# Supplementary material
Source: PubMed Central journal article supplement (PMC2752740)
Supplement: NIHMS110683-supplement-Suppl__Fig__1.pdf [file NIHMS110683-supplement-Suppl__Fig__1.pdf]

gi|70887487|gb|EAO00243.1| hypothetical protein, conserved [*Trypanosoma cruzi*]

K.YVVEQLLEAESR.Y

M+H=1451.701294

DeltaM=1.32854

z=2

P(pep)=3.01E-05

Xcorr=3.98

DCn=0.36

#3572-3572 NL: 9.38E1

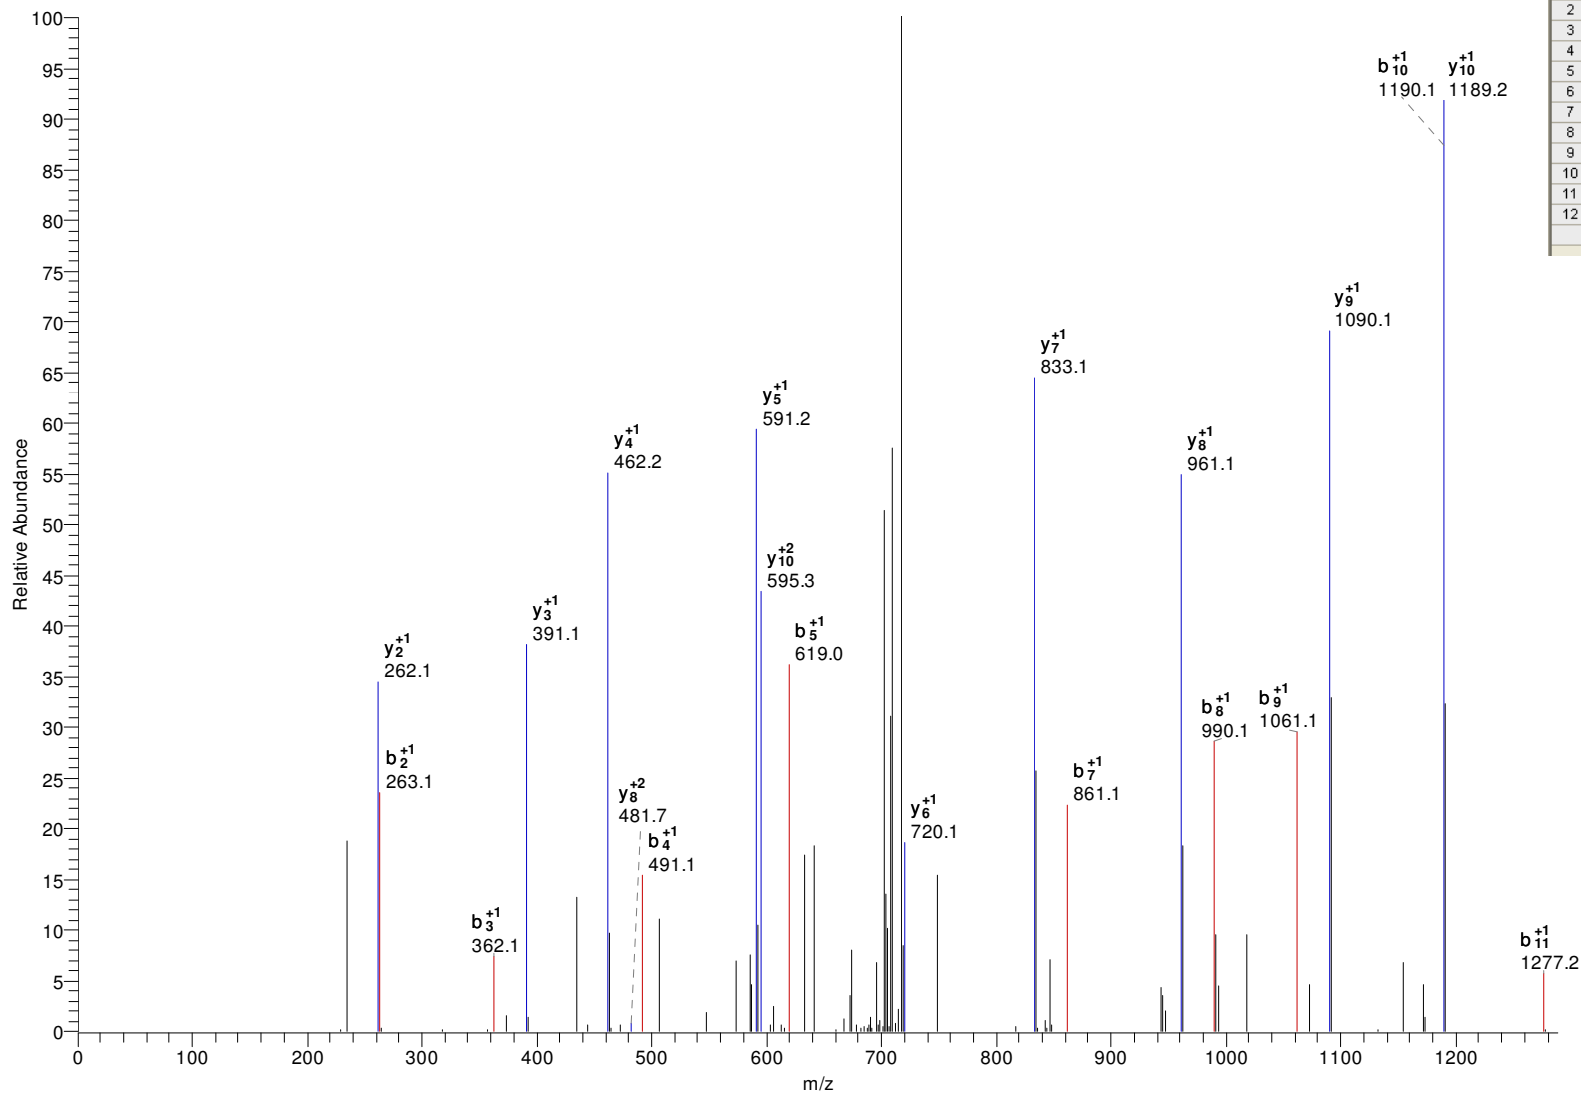

|    | AA | B       | Y       |    |
|----|----|---------|---------|----|
| 1  | Y  | 164.07  | -       | 12 |
| 2  | V  | 263.14  | 1288.64 | 11 |
| 3  | V  | 362.21  | 1189.57 | 10 |
| 4  | E  | 491.25  | 1090.50 | 9  |
| 5  | Q  | 619.31  | 961.46  | 8  |
| 6  | L  | 732.39  | 833.40  | 7  |
| 7  | E  | 861.44  | 720.32  | 6  |
| 8  | E  | 990.48  | 591.27  | 5  |
| 9  | A  | 1061.51 | 462.23  | 4  |
| 10 | E  | 1190.56 | 391.19  | 3  |
| 11 | S  | 1277.59 | 262.15  | 2  |
| 12 | R  | -       | 175.12  | 1  |

gi|70874996|gb|EAN88612.1| small GTP-binding protein Rab11, putative [Trypanosoma cruzi]  
 K.SVYDLVVAPVDAAGGR.R M+H=1588.833008 DeltaM=1.56609 z=2  
 P(pep)=2.19E-07 Xcorr=3.84 DCn=0.42

#4558-4558 NL: 5.32E2

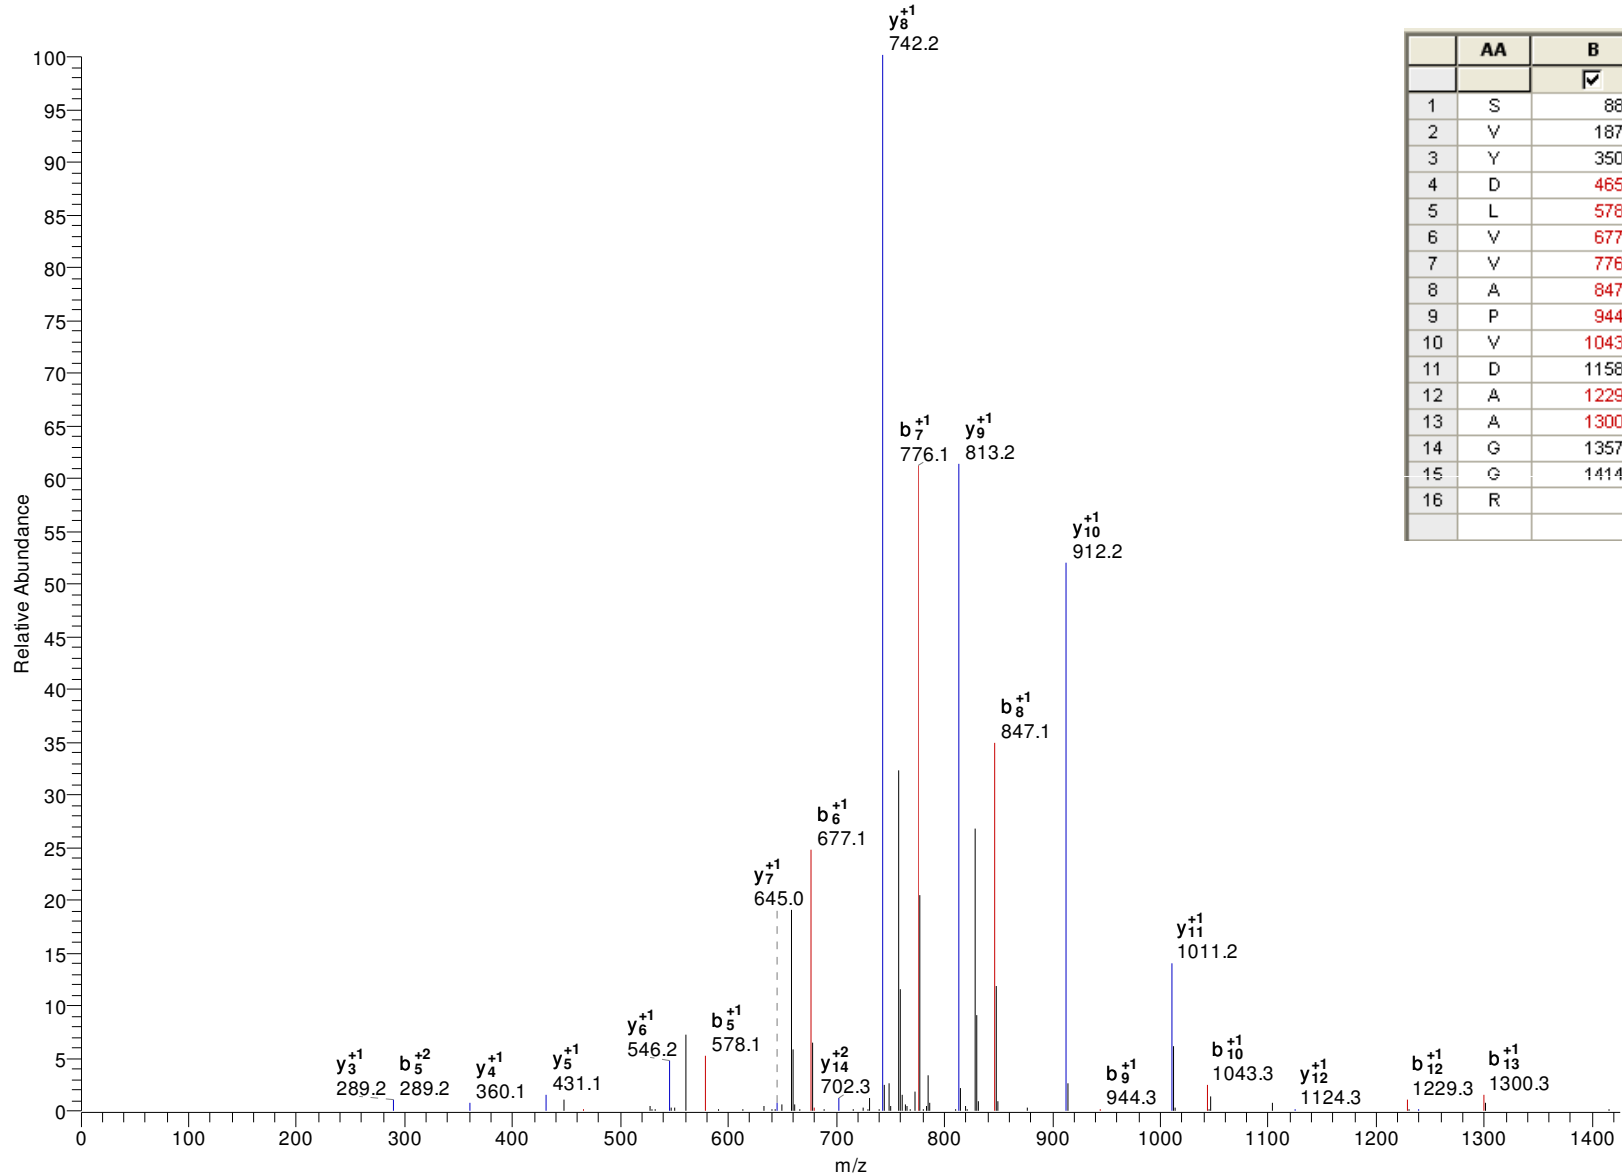

|    | AA | B       | Y       |    |
|----|----|---------|---------|----|
| 1  | S  | 88.04   | -       | 16 |
| 2  | V  | 187.11  | 1501.80 | 15 |
| 3  | Y  | 350.17  | 1402.73 | 14 |
| 4  | D  | 465.20  | 1239.67 | 13 |
| 5  | L  | 578.28  | 1124.64 | 12 |
| 6  | V  | 677.35  | 1011.56 | 11 |
| 7  | V  | 776.42  | 912.49  | 10 |
| 8  | A  | 847.46  | 813.42  | 9  |
| 9  | P  | 944.51  | 742.38  | 8  |
| 10 | V  | 1043.58 | 645.33  | 7  |
| 11 | D  | 1158.60 | 546.26  | 6  |
| 12 | A  | 1229.64 | 431.24  | 5  |
| 13 | A  | 1300.68 | 360.20  | 4  |
| 14 | G  | 1357.70 | 289.16  | 3  |
| 15 | G  | 1414.72 | 232.14  | 2  |
| 16 | R  | -       | 175.12  | 1  |

gi|70879856|gb|EAN92997.1| carbonic anhydrase-like protein, putative [Trypanosoma cruzi]

K.IENEVNTISVR.F

M+H=1273.674683

DeltaM=1.38201

z=2

P(pep)=5.43E-06

Xcorr=3.44

DCn=0.35

#2657-2657 NL: 1.55E2

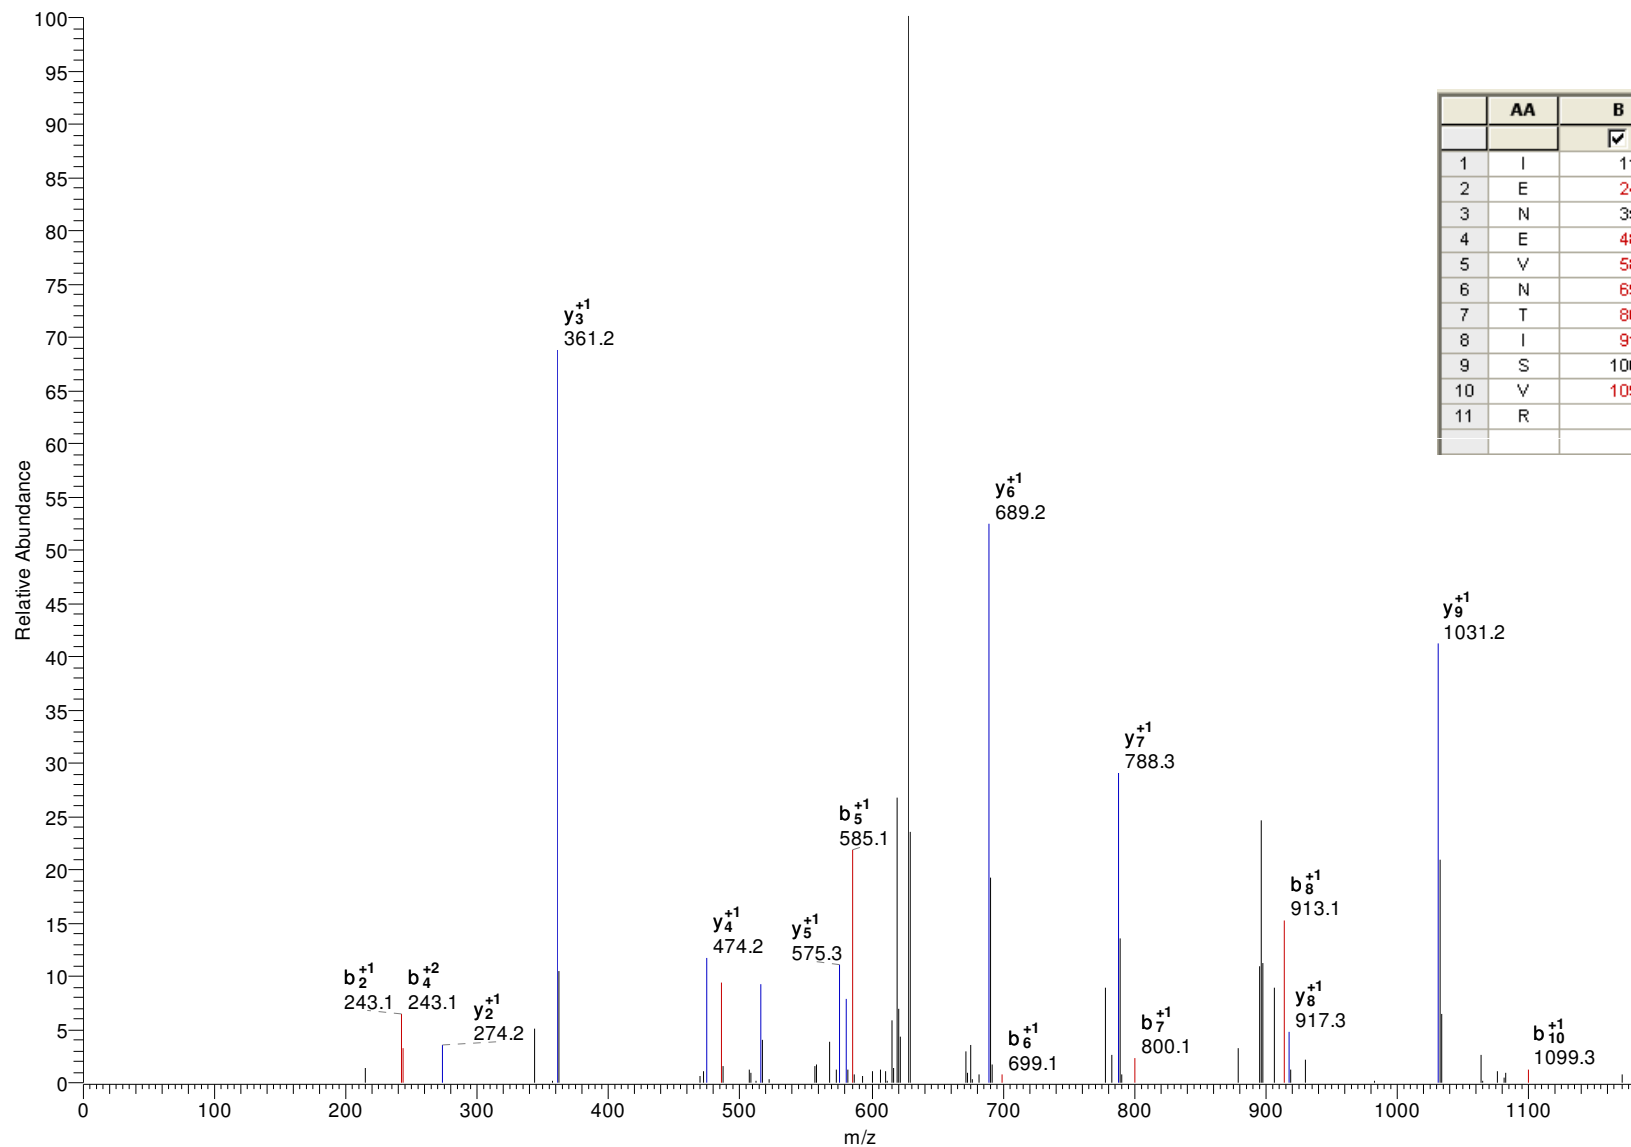

|    | AA | B                                   | Y                                   |    |
|----|----|-------------------------------------|-------------------------------------|----|
|    |    | <input checked="" type="checkbox"/> | <input checked="" type="checkbox"/> |    |
| 1  | I  | 114.09                              | -                                   | 11 |
| 2  | E  | 243.13                              | 1160.59                             | 10 |
| 3  | N  | 357.18                              | 1031.55                             | 9  |
| 4  | E  | 486.22                              | 917.51                              | 8  |
| 5  | V  | 585.29                              | 788.46                              | 7  |
| 6  | N  | 699.33                              | 689.39                              | 6  |
| 7  | T  | 800.38                              | 575.35                              | 5  |
| 8  | I  | 913.46                              | 474.30                              | 4  |
| 9  | S  | 1000.49                             | 361.22                              | 3  |
| 10 | V  | 1099.56                             | 274.19                              | 2  |
| 11 | R  | -                                   | 175.12                              | 1  |

gi|929907|emb|CAA30150.1| unnamed protein product [Trypanosoma cruzi]

K.LAVNLVPFPR.L

M+H=1125.677856

DeltaM=1.01763

z=2

P(pep)=1.50E-4

Xcorr=3.19

DCn=0.36

#4634-4634 NL: 7.09E2

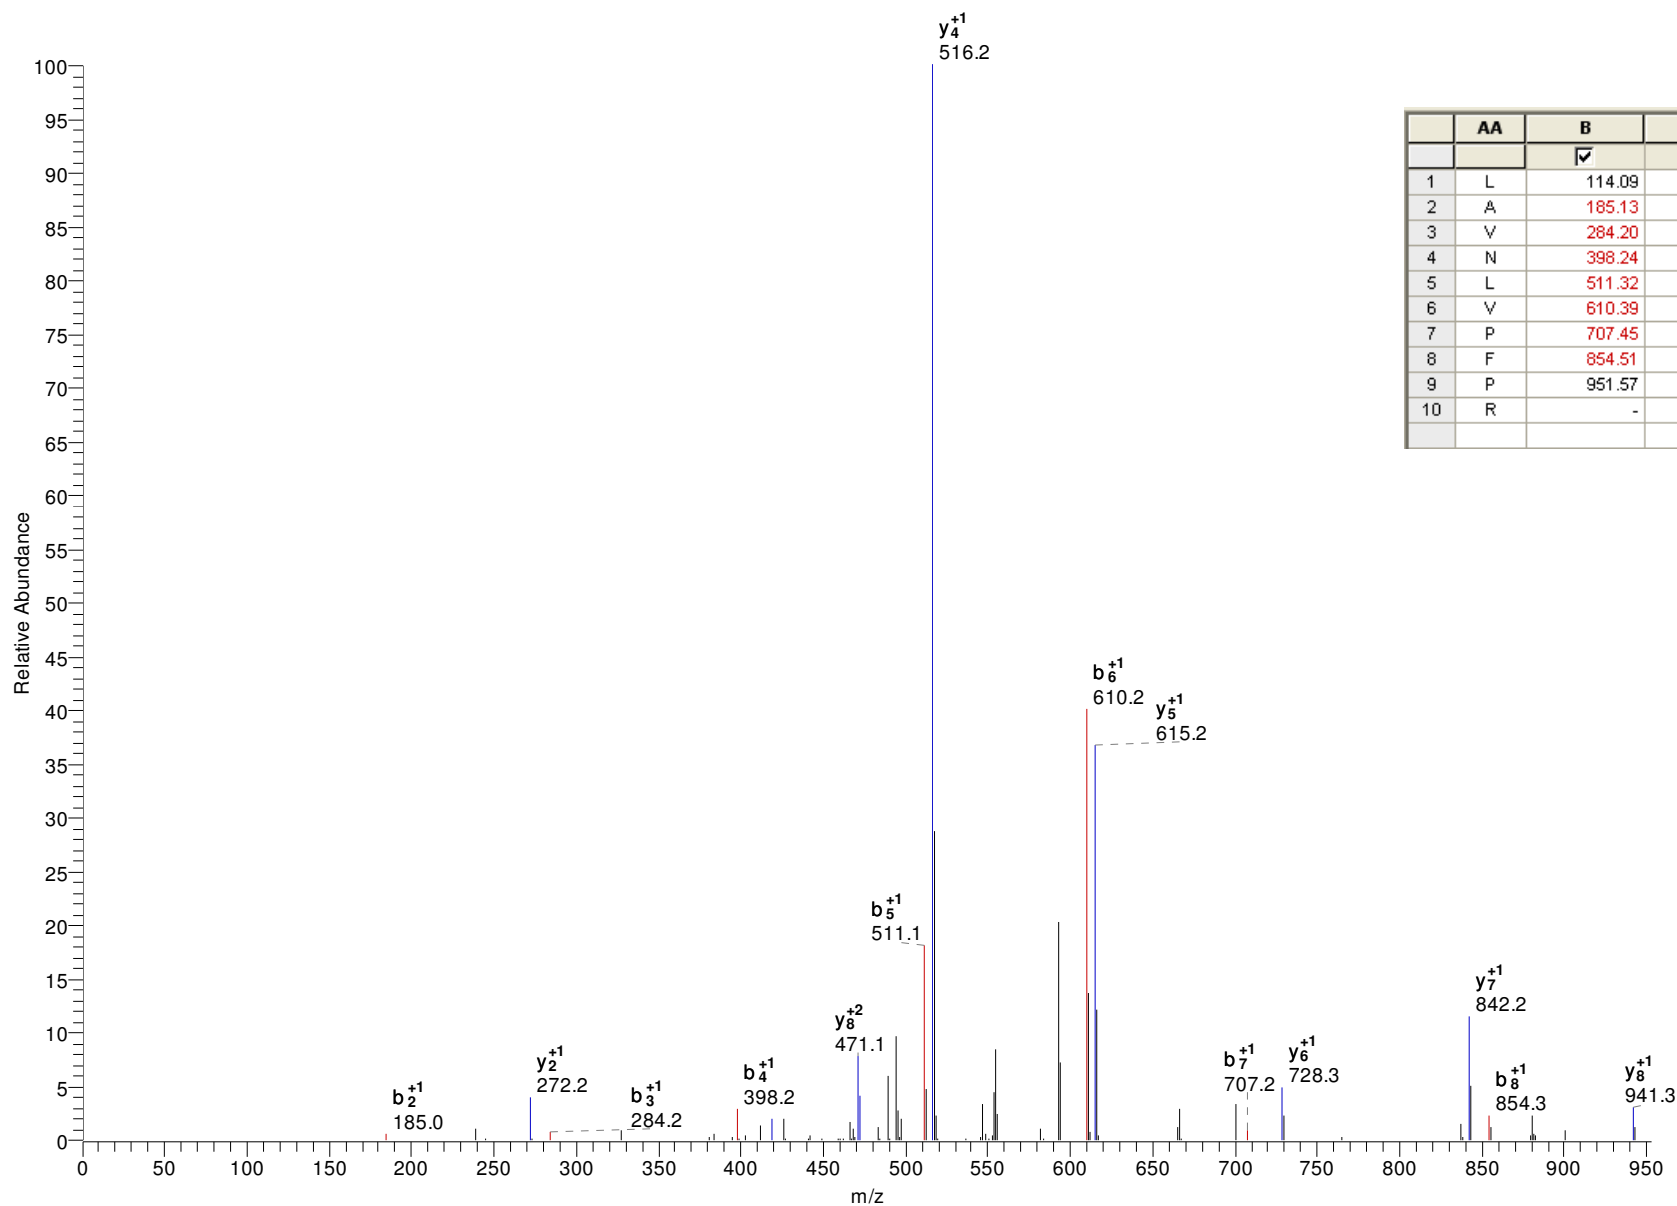

|    | AA | B                                   | Y                                   |    |
|----|----|-------------------------------------|-------------------------------------|----|
|    |    | <input checked="" type="checkbox"/> | <input checked="" type="checkbox"/> |    |
| 1  | L  | 114.09                              | -                                   | 10 |
| 2  | A  | 185.13                              | 1012.59                             | 9  |
| 3  | V  | 284.20                              | 941.56                              | 8  |
| 4  | N  | 398.24                              | 842.49                              | 7  |
| 5  | L  | 511.32                              | 728.45                              | 6  |
| 6  | V  | 610.39                              | 615.36                              | 5  |
| 7  | P  | 707.45                              | 516.29                              | 4  |
| 8  | F  | 854.51                              | 419.24                              | 3  |
| 9  | P  | 951.57                              | 272.17                              | 2  |
| 10 | R  | -                                   | 175.12                              | 1  |

gi|70885383|gb|EAN98205.1| 40S ribosomal protein S18, putative [Trypanosoma cruzi]

R.AGTLTAEELER.I

M+H=1189.605957

DeltaM=1.64922

z=2

P(pep)=2.28E-4

Xcorr=3.15

DCn=0.36

#2539-2539 NL: 8.58E2

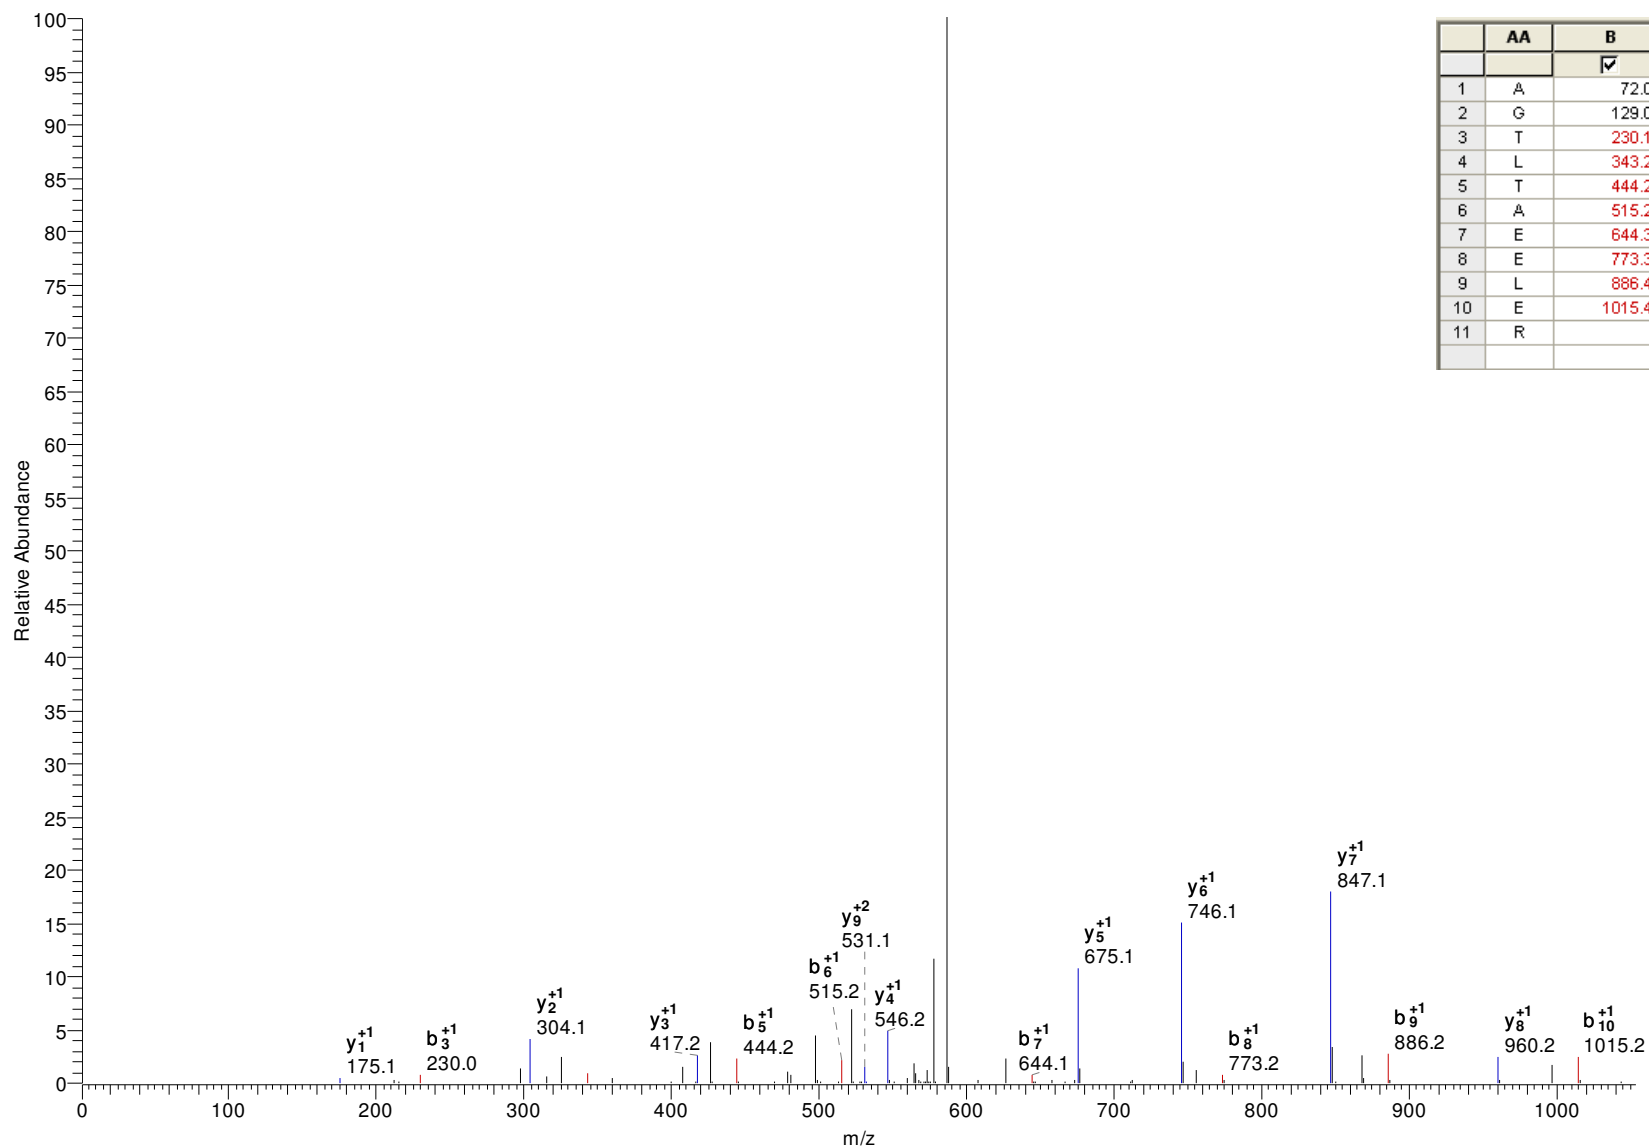

|    | AA | B       | Y       |    |
|----|----|---------|---------|----|
|    |    | ✓       | ✓       |    |
| 1  | A  | 72.04   | -       | 11 |
| 2  | G  | 129.07  | 1118.57 | 10 |
| 3  | T  | 230.11  | 1061.55 | 9  |
| 4  | L  | 343.20  | 960.50  | 8  |
| 5  | T  | 444.25  | 847.42  | 7  |
| 6  | A  | 515.28  | 746.37  | 6  |
| 7  | E  | 644.32  | 675.33  | 5  |
| 8  | E  | 773.37  | 546.29  | 4  |
| 9  | L  | 886.45  | 417.25  | 3  |
| 10 | E  | 1015.49 | 304.16  | 2  |
| 11 | R  | -       | 175.12  | 1  |

gi|70881500|gb|EAN94526.1| hypothetical protein, conserved [Trypanosoma cruzi]  
 K.M\*DENLDVQEVQDASEGTRE.- M+H=2180.924812 DeltaM=-1.88370 z=3  
 P(pep)=1.99E-4 Xcorr=2.94 DCn=0.38

#3572-3572 NL: 9.38E1

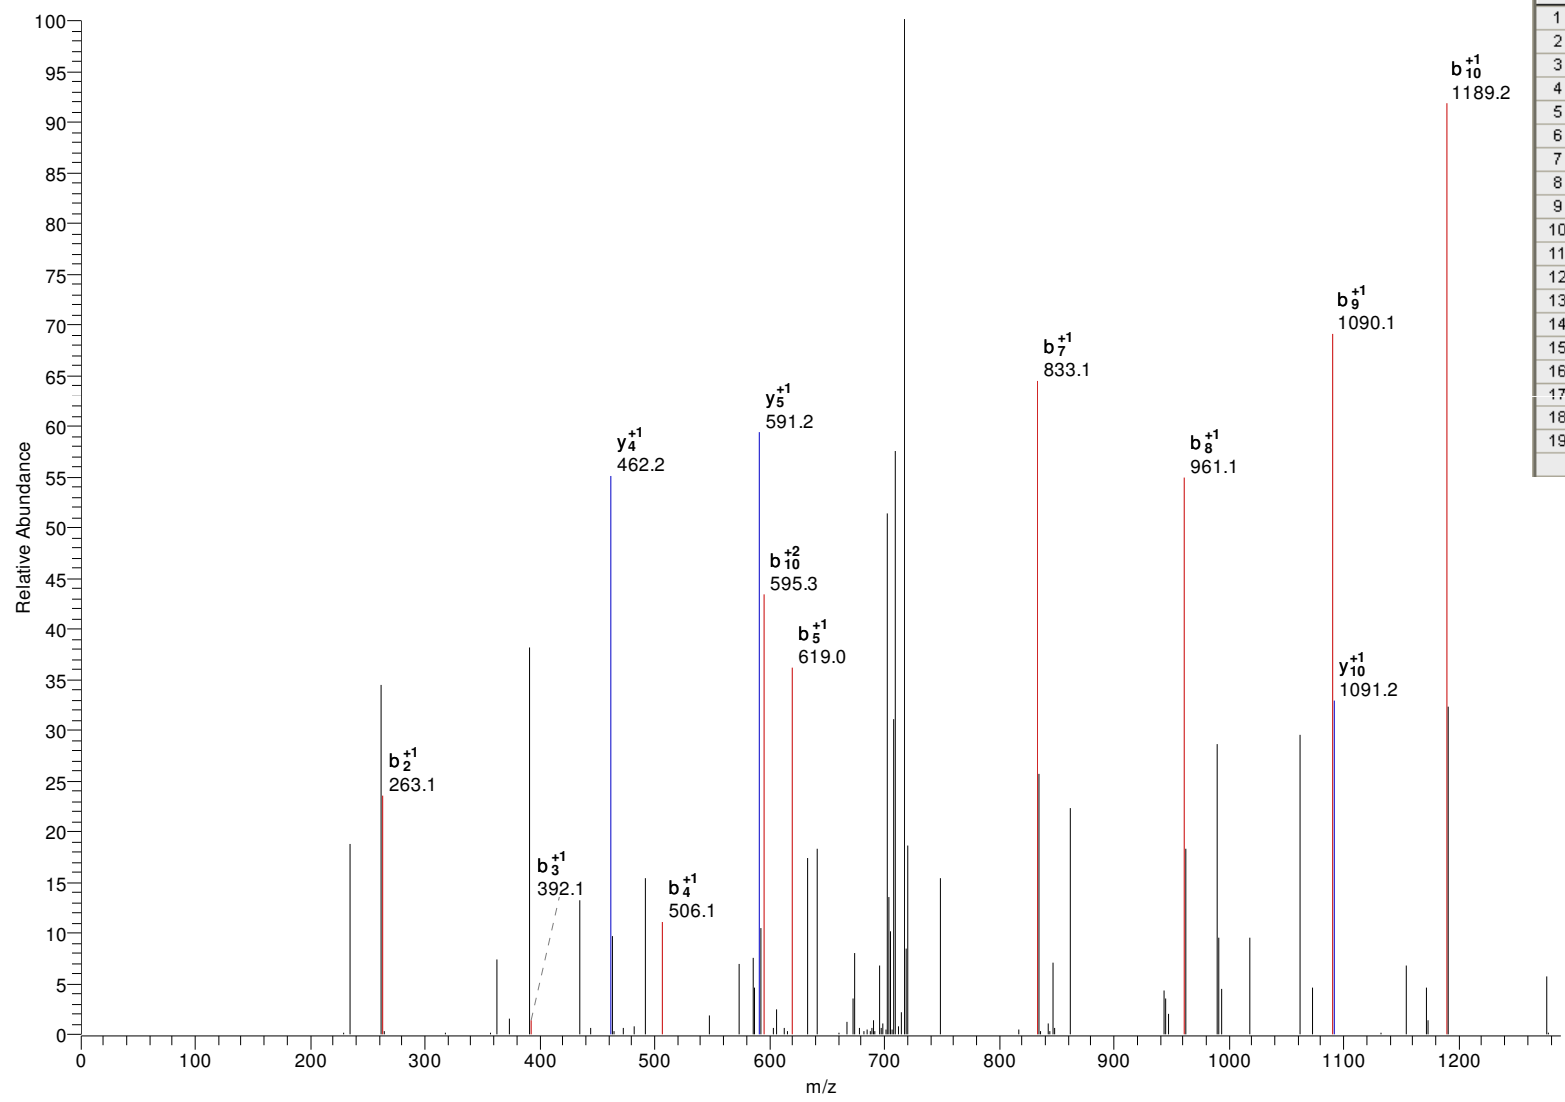

|    | AA | B       | Y       |    |
|----|----|---------|---------|----|
|    |    | ☑       | ☑       |    |
| 1  | M* | 148.04  | -       | 19 |
| 2  | D  | 263.07  | 2033.89 | 18 |
| 3  | E  | 392.11  | 1918.86 | 17 |
| 4  | N  | 506.16  | 1789.82 | 16 |
| 5  | L  | 619.24  | 1675.78 | 15 |
| 6  | D  | 734.27  | 1562.69 | 14 |
| 7  | V  | 833.33  | 1447.67 | 13 |
| 8  | Q  | 961.39  | 1348.60 | 12 |
| 9  | E  | 1090.44 | 1220.54 | 11 |
| 10 | V  | 1189.50 | 1091.50 | 10 |
| 11 | Q  | 1317.56 | 992.43  | 9  |
| 12 | D  | 1432.59 | 864.37  | 8  |
| 13 | A  | 1503.63 | 749.34  | 7  |
| 14 | S  | 1590.66 | 678.31  | 6  |
| 15 | E  | 1719.70 | 591.27  | 5  |
| 16 | G  | 1776.72 | 462.23  | 4  |
| 17 | T  | 1877.77 | 405.21  | 3  |
| 18 | R  | 2033.87 | 304.16  | 2  |
| 19 | E  | -       | 148.06  | 1  |

gi|70871653|gb|EAN85763.1| small GTP-binding protein Rab1, putative [Trypanosoma cruzi]

K.DFADNLGIPFLETSAK.E

M+H=1737.869385

DeltaM=0.31108

z=2

P(pep)=1.47E-05

Xcorr=2.93

DCn=0.47

#5870-5870 NL: 2.24E2

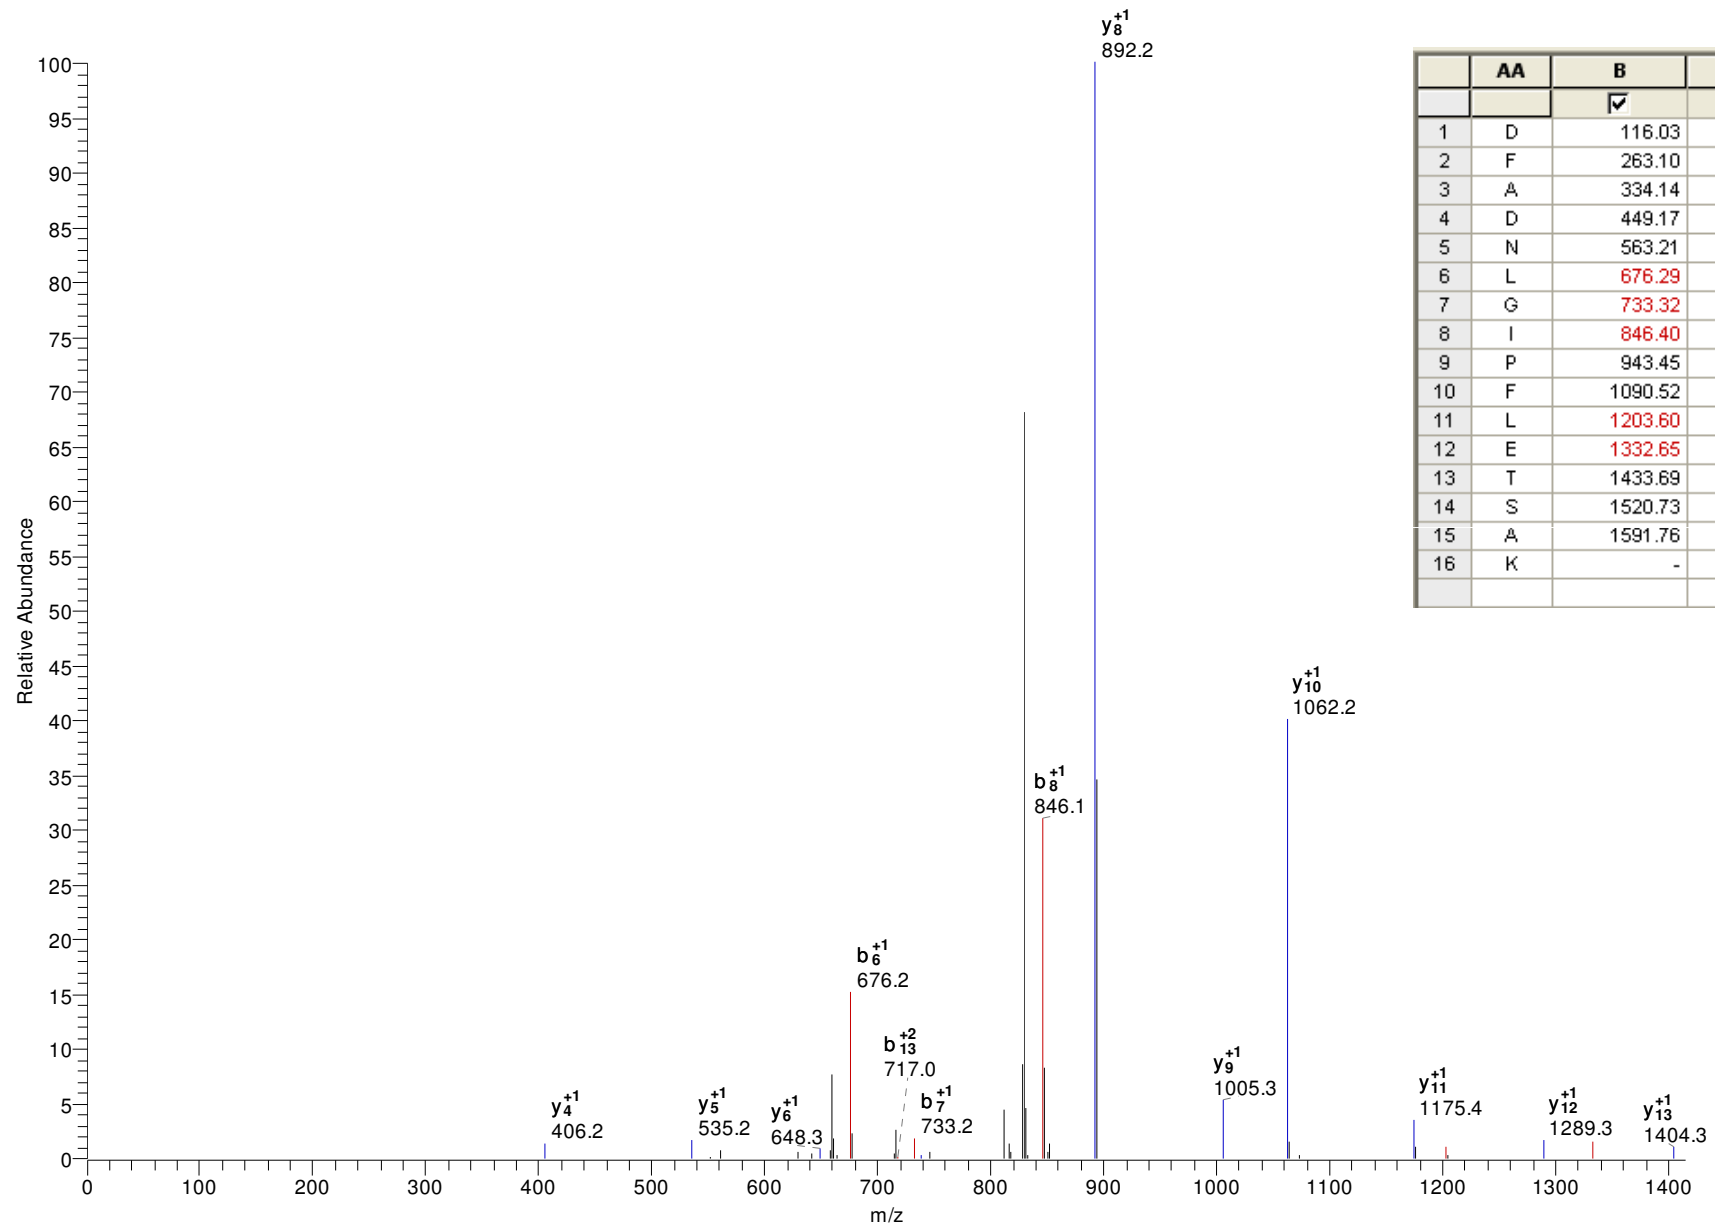

|    | AA | B                                   | Y                                   |    |
|----|----|-------------------------------------|-------------------------------------|----|
|    |    | <input checked="" type="checkbox"/> | <input checked="" type="checkbox"/> |    |
| 1  | D  | 116.03                              | -                                   | 16 |
| 2  | F  | 263.10                              | 1622.84                             | 15 |
| 3  | A  | 334.14                              | 1475.77                             | 14 |
| 4  | D  | 449.17                              | 1404.74                             | 13 |
| 5  | N  | 563.21                              | 1289.71                             | 12 |
| 6  | L  | 676.29                              | 1175.67                             | 11 |
| 7  | G  | 733.32                              | 1062.58                             | 10 |
| 8  | I  | 846.40                              | 1005.56                             | 9  |
| 9  | P  | 943.45                              | 892.48                              | 8  |
| 10 | F  | 1090.52                             | 795.42                              | 7  |
| 11 | L  | 1203.60                             | 648.36                              | 6  |
| 12 | E  | 1332.65                             | 535.27                              | 5  |
| 13 | T  | 1433.69                             | 406.23                              | 4  |
| 14 | S  | 1520.73                             | 305.18                              | 3  |
| 15 | A  | 1591.76                             | 218.15                              | 2  |
| 16 | K  | -                                   | 147.11                              | 1  |

gi|70872485|gb|EAN86456.1| ubiquitin carboxyl-terminal hydrolase, putative [Trypanosoma cruzi]  
K.GKLEGIVVEALAK.K M+H=1356.773315 DeltaM=1.74260 z=2  
P(pep)=7.58E-06 Xcorr=2.92 DCn=0.45

#4765-4765 NL: 4.74E1

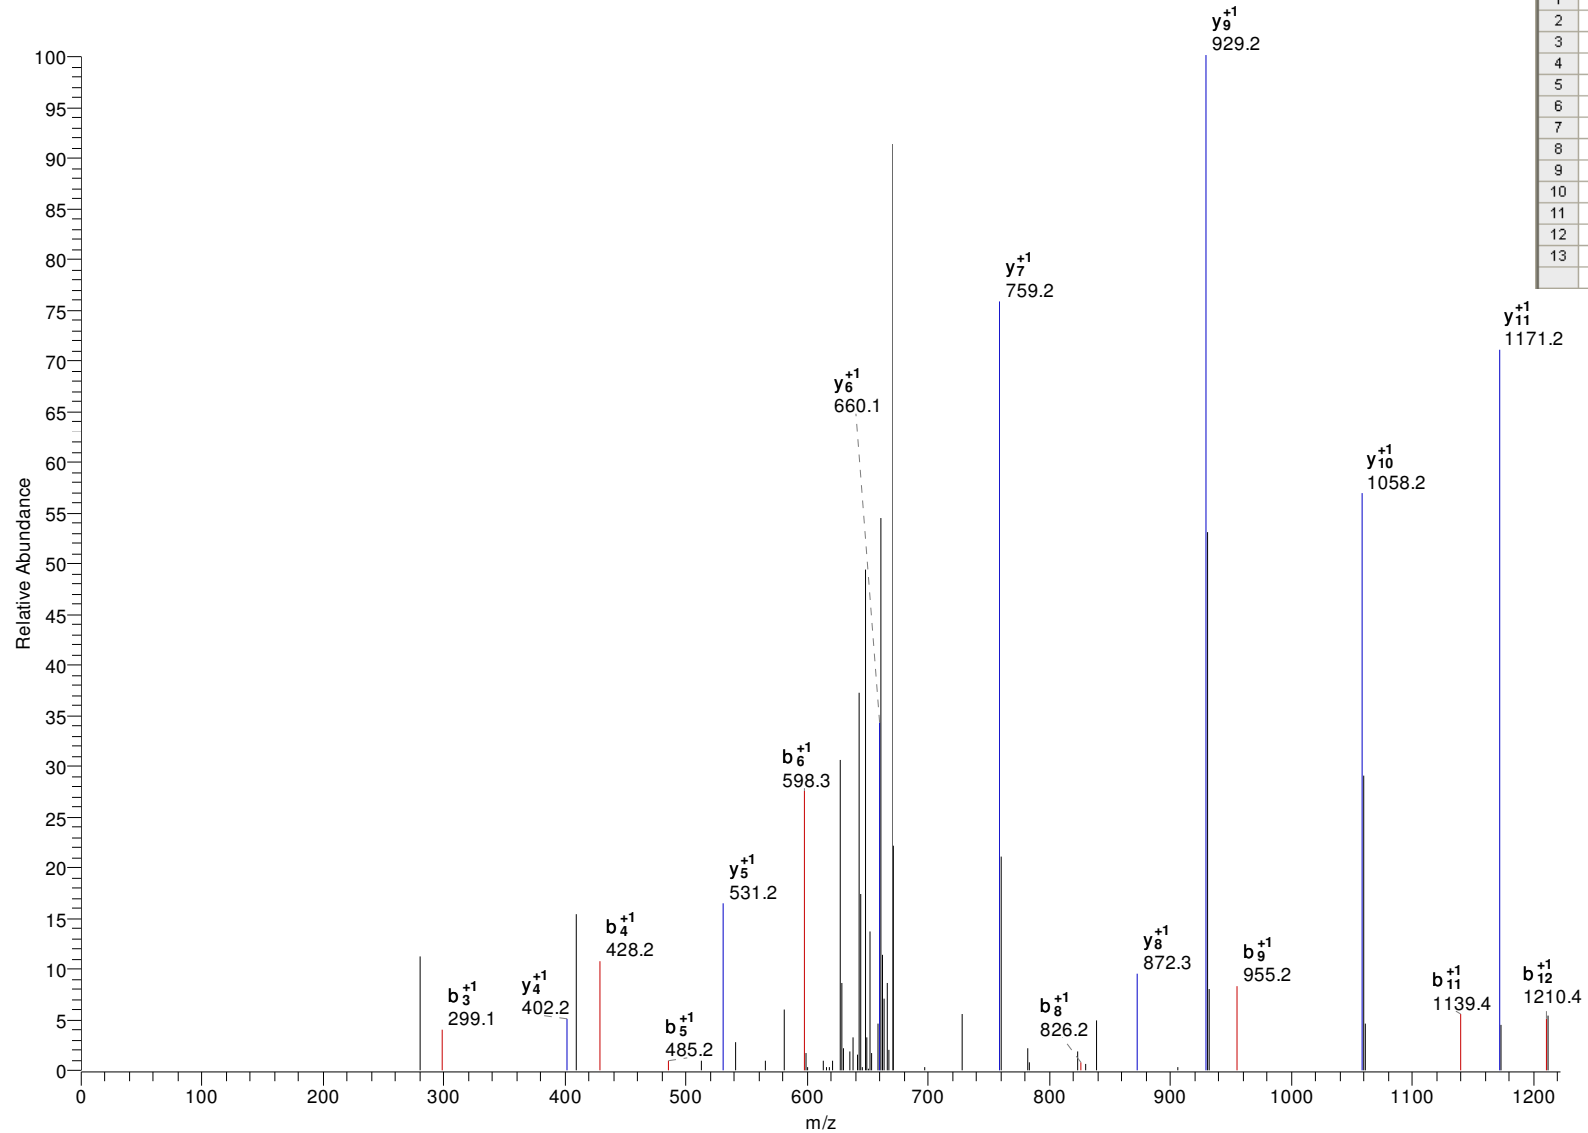

|    | AA | B       | Y       |    |
|----|----|---------|---------|----|
| 1  | G  | 58.03   | -       | 13 |
| 2  | K  | 186.12  | 1299.75 | 12 |
| 3  | L  | 299.21  | 1171.66 | 11 |
| 4  | E  | 428.25  | 1058.57 | 10 |
| 5  | G  | 485.27  | 929.53  | 9  |
| 6  | I  | 598.36  | 872.51  | 8  |
| 7  | V  | 697.42  | 759.42  | 7  |
| 8  | E  | 826.47  | 660.36  | 6  |
| 9  | E  | 955.51  | 531.31  | 5  |
| 10 | A  | 1026.55 | 402.27  | 4  |
| 11 | L  | 1139.63 | 331.23  | 3  |
| 12 | A  | 1210.67 | 218.15  | 2  |
| 13 | K  | -       | 147.11  | 1  |



gi|70874991|gb|EAN88607.1| nuclear transport factor 2, putative [Trypanosoma cruzi]  
 R.FANLGFNEAIFK.A M+H=1370.710327 DeltaM=0.49553 z=2  
 P(pep)=6.95E-09 Xcorr=2.92 DCn=0.48

#5041-5041 NL: 1.53E2

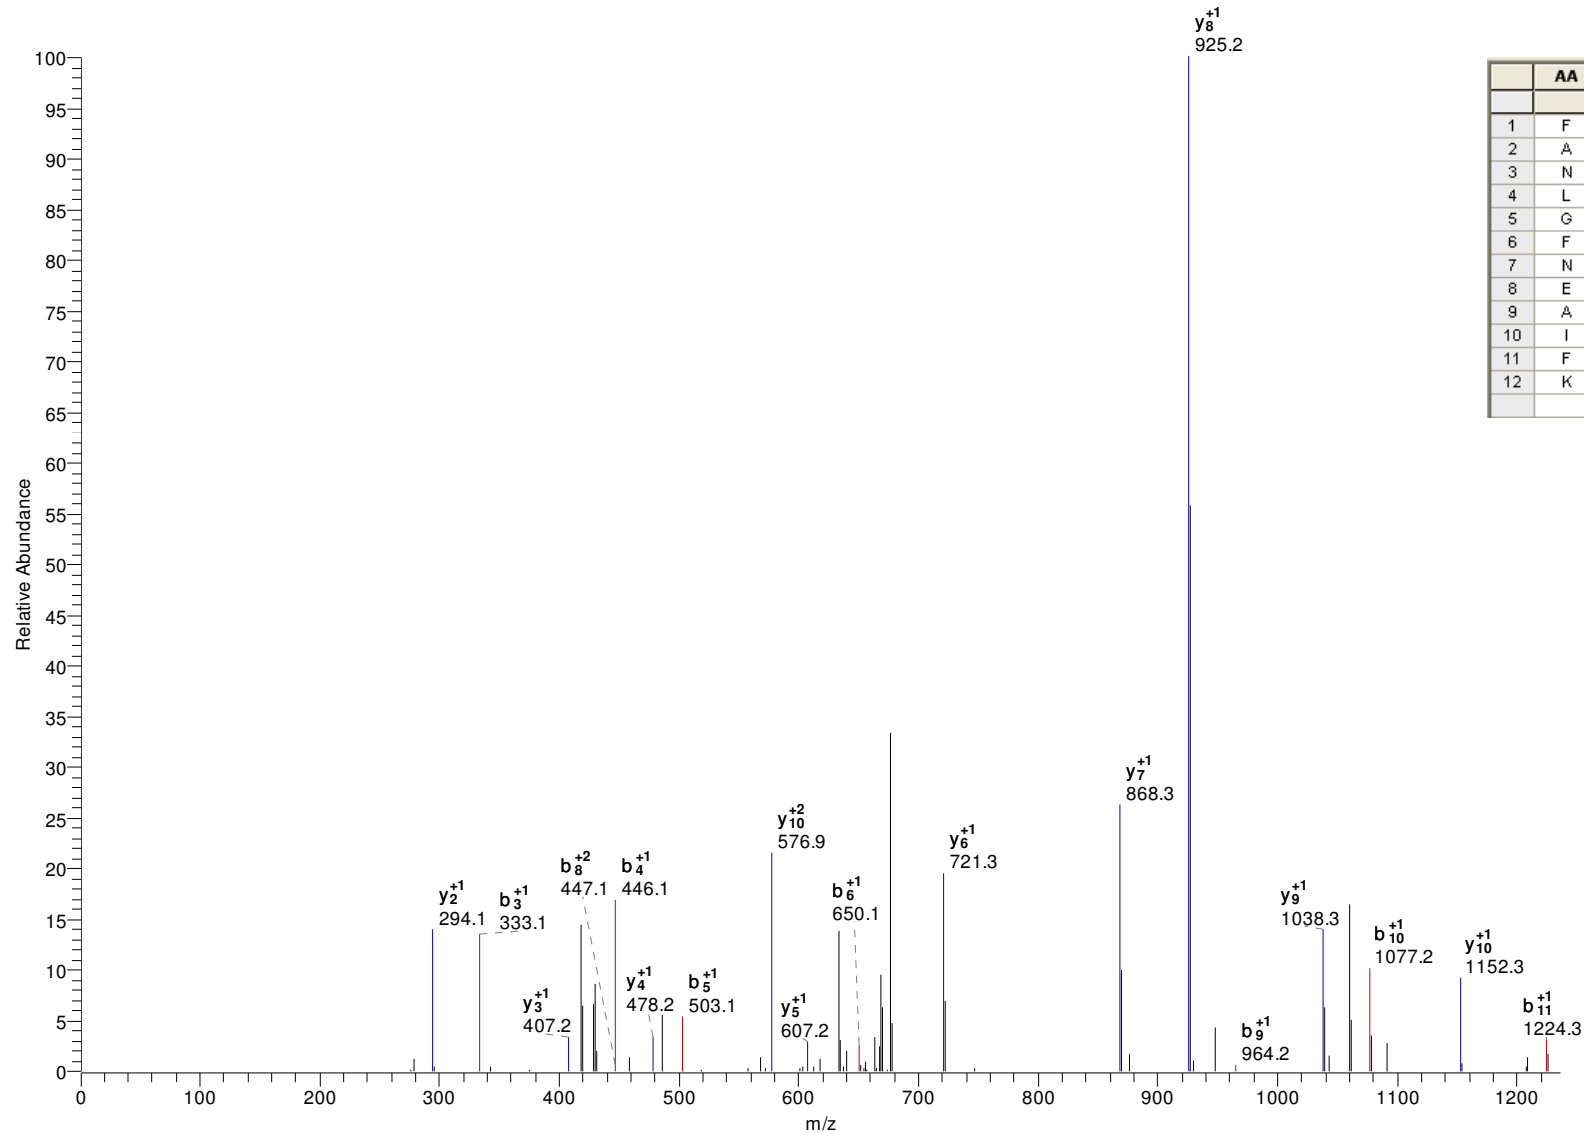

|    | AA | B                                   | Y                                   |    |
|----|----|-------------------------------------|-------------------------------------|----|
|    |    | <input checked="" type="checkbox"/> | <input checked="" type="checkbox"/> |    |
| 1  | F  | 148.08                              | -                                   | 12 |
| 2  | A  | 219.11                              | 1223.64                             | 11 |
| 3  | N  | 333.16                              | 1152.60                             | 10 |
| 4  | L  | 446.24                              | 1038.56                             | 9  |
| 5  | G  | 503.26                              | 925.48                              | 8  |
| 6  | F  | 650.33                              | 868.46                              | 7  |
| 7  | N  | 764.37                              | 721.39                              | 6  |
| 8  | E  | 893.42                              | 607.34                              | 5  |
| 9  | A  | 964.45                              | 478.30                              | 4  |
| 10 | I  | 1077.54                             | 407.27                              | 3  |
| 11 | F  | 1224.60                             | 294.18                              | 2  |
| 12 | K  | -                                   | 147.11                              | 1  |

gi|70869754|gb|EAN84258.1| cation transporter, putative [Trypanosoma cruzi]

R.GALSA AHLNSAR.R

M+H=1167.622925

DeltaM=0.49382

z=2

P(pep)=2.49E-06

Xcorr=2.90

DCn=0.45

#2171-2171 NL: 1.74E2

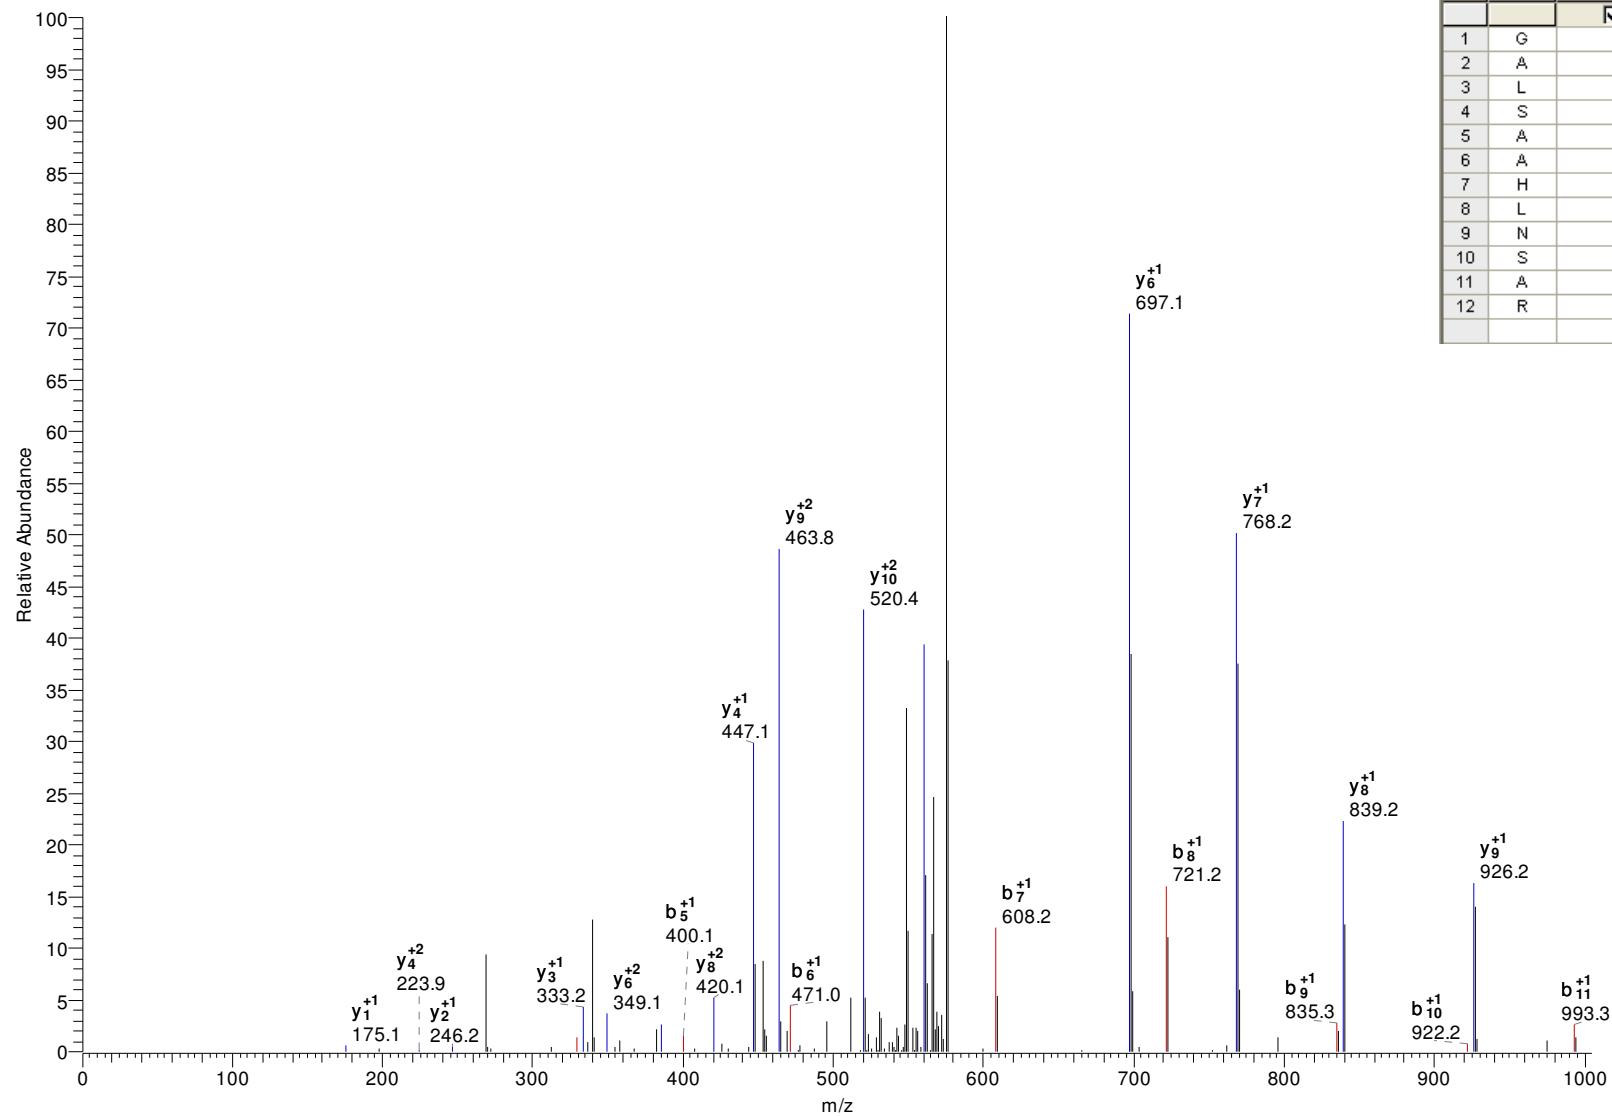

|    | AA | B      | Y       |    |
|----|----|--------|---------|----|
|    |    | ✓      | ✓       |    |
| 1  | G  | 58.03  | -       | 12 |
| 2  | A  | 129.07 | 1110.60 | 11 |
| 3  | L  | 242.15 | 1039.56 | 10 |
| 4  | S  | 329.18 | 926.48  | 9  |
| 5  | A  | 400.22 | 839.45  | 8  |
| 6  | A  | 471.26 | 768.41  | 7  |
| 7  | H  | 608.32 | 697.37  | 6  |
| 8  | L  | 721.40 | 560.32  | 5  |
| 9  | N  | 835.44 | 447.23  | 4  |
| 10 | S  | 922.47 | 333.19  | 3  |
| 11 | A  | 993.51 | 246.16  | 2  |
| 12 | R  | -      | 175.12  | 1  |

gi|70874608|gb|EAN88271.1| hypothetical protein, conserved [Trypanosoma cruzi]  
 K.IICPTCSEEDQK.E M+H=1479.645508 DeltaM=1.55449 z=2  
 P(pep)=5.21E-06 Xcorr=2.85 DCn=0.39

#2207-2207 NL: 7.82E3

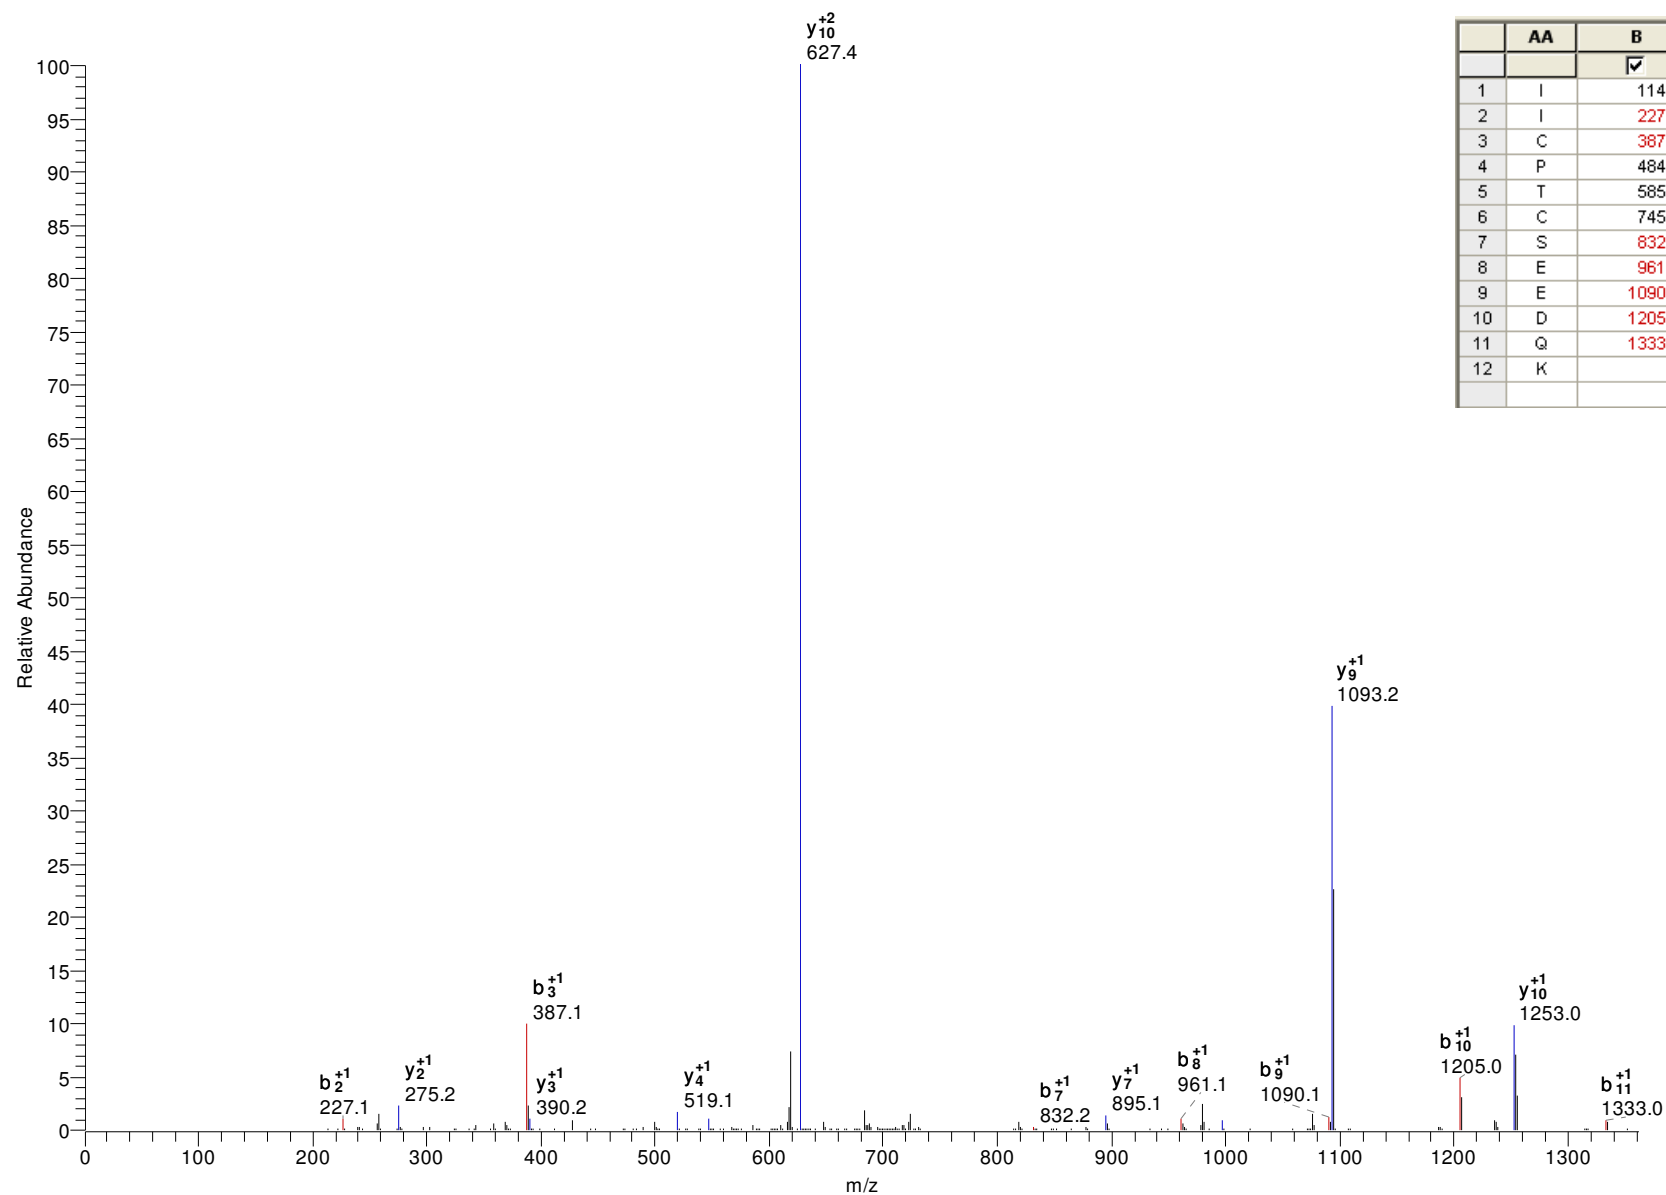

|    | AA | B                                   | Y                                   |    |
|----|----|-------------------------------------|-------------------------------------|----|
|    |    | <input checked="" type="checkbox"/> | <input checked="" type="checkbox"/> |    |
| 1  | I  | 114.09                              | -                                   | 12 |
| 2  | I  | 227.18                              | 1366.56                             | 11 |
| 3  | C  | 387.21                              | 1253.48                             | 10 |
| 4  | P  | 484.26                              | 1093.45                             | 9  |
| 5  | T  | 585.31                              | 996.39                              | 8  |
| 6  | C  | 745.34                              | 895.35                              | 7  |
| 7  | S  | 832.37                              | 735.32                              | 6  |
| 8  | E  | 961.41                              | 648.28                              | 5  |
| 9  | E  | 1090.45                             | 519.24                              | 4  |
| 10 | D  | 1205.48                             | 390.20                              | 3  |
| 11 | Q  | 1333.54                             | 275.17                              | 2  |
| 12 | K  | -                                   | 147.11                              | 1  |

gi|70883212|gb|EAN96137.1| hypothetical protein, conserved [Trypanosoma cruzi]  
K.ESGVGSDNNPVLGIR.Q M+H=1513.760498 DeltaM=1.24199 z=2  
P(pep)=0.001287675 Xcorr=2.79 DCn=0.41

#3366-3366 NL: 1.31E2

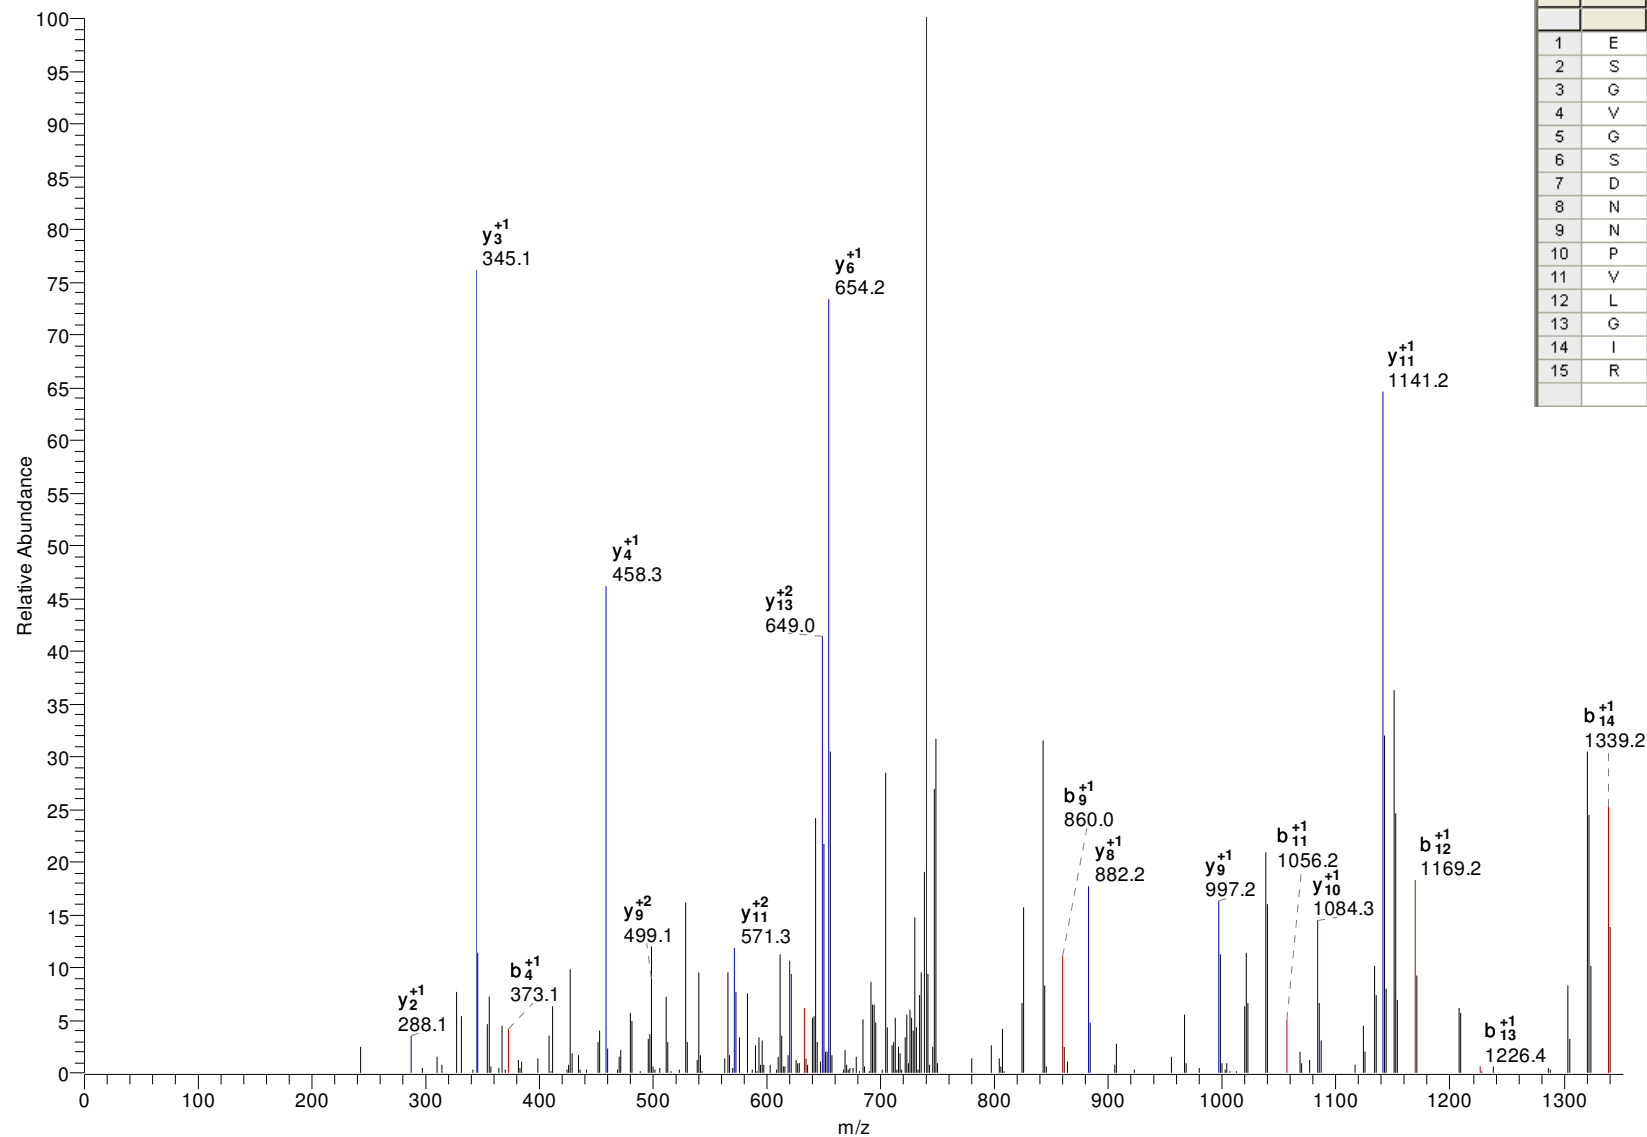

|    | AA | B                                   | Y                                   |    |
|----|----|-------------------------------------|-------------------------------------|----|
|    |    | <input checked="" type="checkbox"/> | <input checked="" type="checkbox"/> |    |
| 1  | E  | 130.05                              | -                                   | 15 |
| 2  | S  | 217.08                              | 1384.72                             | 14 |
| 3  | G  | 274.10                              | 1297.69                             | 13 |
| 4  | V  | 373.17                              | 1240.66                             | 12 |
| 5  | G  | 430.19                              | 1141.60                             | 11 |
| 6  | S  | 517.23                              | 1084.57                             | 10 |
| 7  | D  | 632.25                              | 997.54                              | 9  |
| 8  | N  | 746.30                              | 882.52                              | 8  |
| 9  | N  | 860.34                              | 768.47                              | 7  |
| 10 | P  | 957.39                              | 654.43                              | 6  |
| 11 | V  | 1056.46                             | 557.38                              | 5  |
| 12 | L  | 1169.54                             | 458.31                              | 4  |
| 13 | G  | 1226.56                             | 345.22                              | 3  |
| 14 | I  | 1339.65                             | 288.20                              | 2  |
| 15 | R  | -                                   | 175.12                              | 1  |

gi|70884474|gb|EAN97332.1| hypothetical protein, conserved [Trypanosoma cruzi]  
R.LRDELQYVR.H M+H=1191.648071 DeltaM=0.19036 z=2  
P(pep)=8.82E-05 Xcorr=2.42E+00 DCn=0.29

#2943-2943 NL: 5.65E1

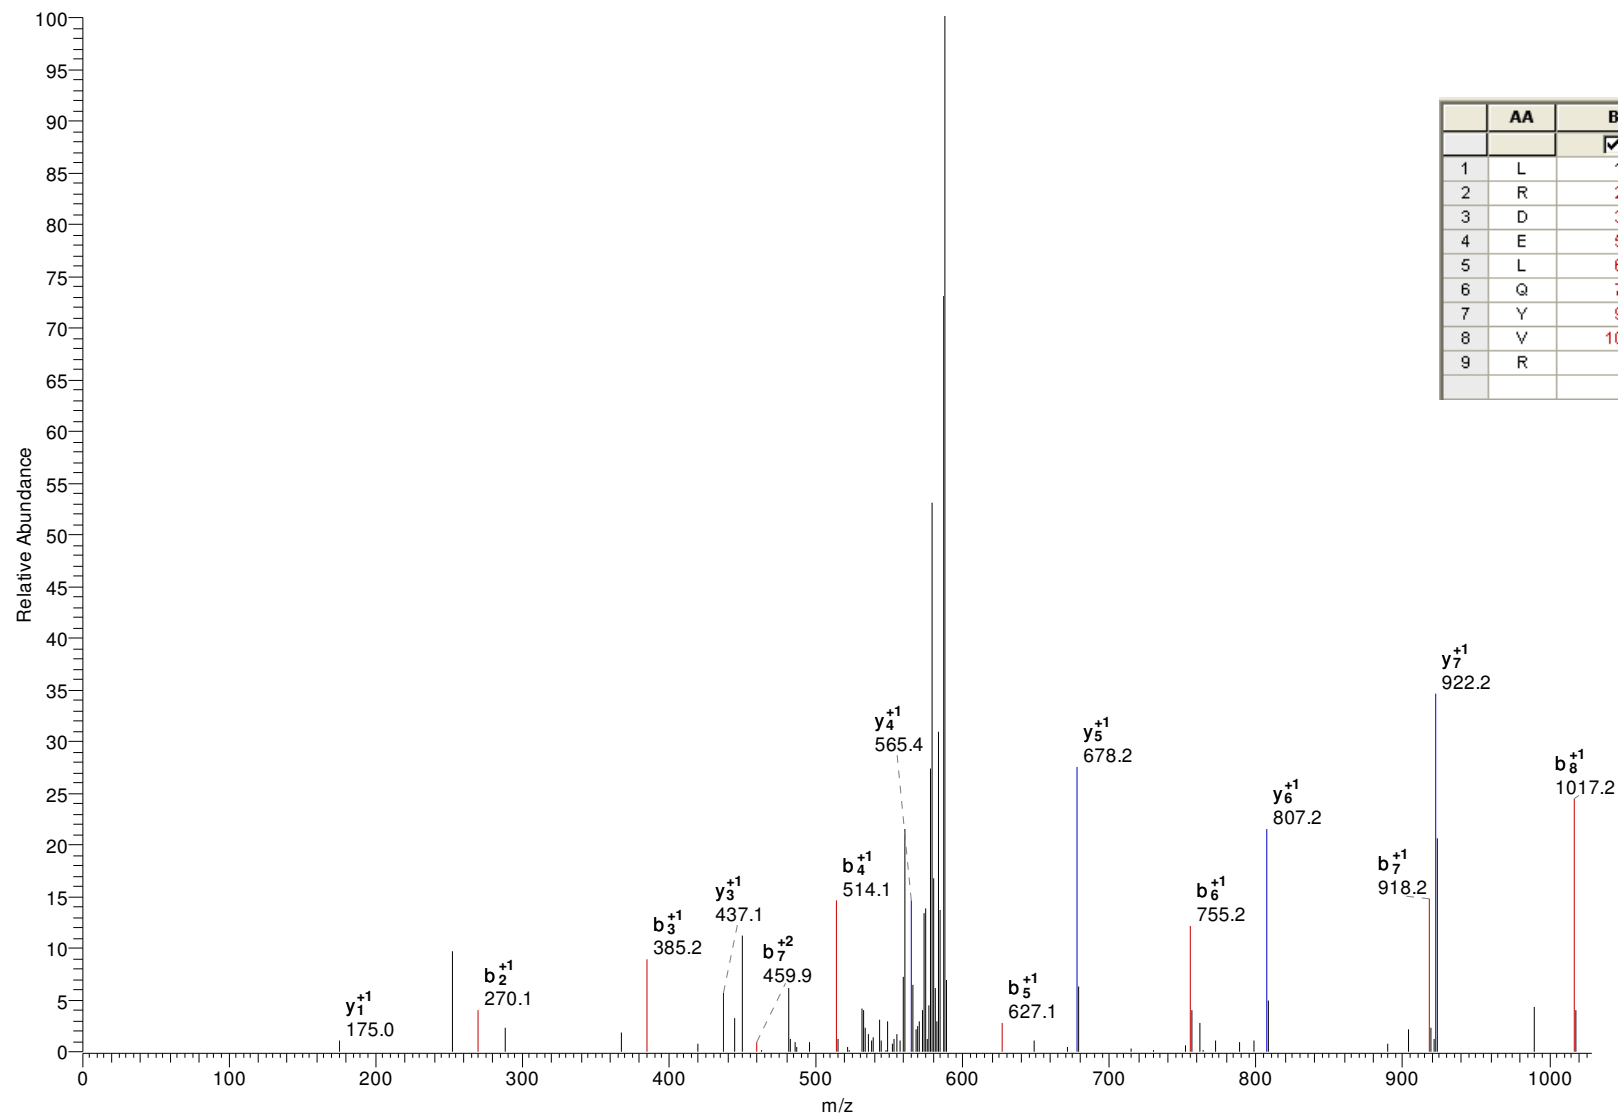

|   | AA | B       | Y       |   |
|---|----|---------|---------|---|
| 1 | L  | 114.09  | -       | 9 |
| 2 | R  | 270.19  | 1078.56 | 8 |
| 3 | D  | 385.22  | 922.46  | 7 |
| 4 | E  | 514.26  | 807.44  | 6 |
| 5 | L  | 627.35  | 678.39  | 5 |
| 6 | Q  | 755.40  | 565.31  | 4 |
| 7 | Y  | 918.47  | 437.25  | 3 |
| 8 | V  | 1017.54 | 274.19  | 2 |
| 9 | R  | -       | 175.12  | 1 |

gi|70870799|gb|EAN85068.1| membrane-bound acid phosphatase, putative [Trypanosoma cruzi]  
K.LCSPNGASSCTAIK.R M+H=1536.7146 DeltaM=0.52739 z=2  
P(pep)=1.24E-05 Xcorr=2.57 DCn=0.26

#2225-2225 NL: 3.97E2

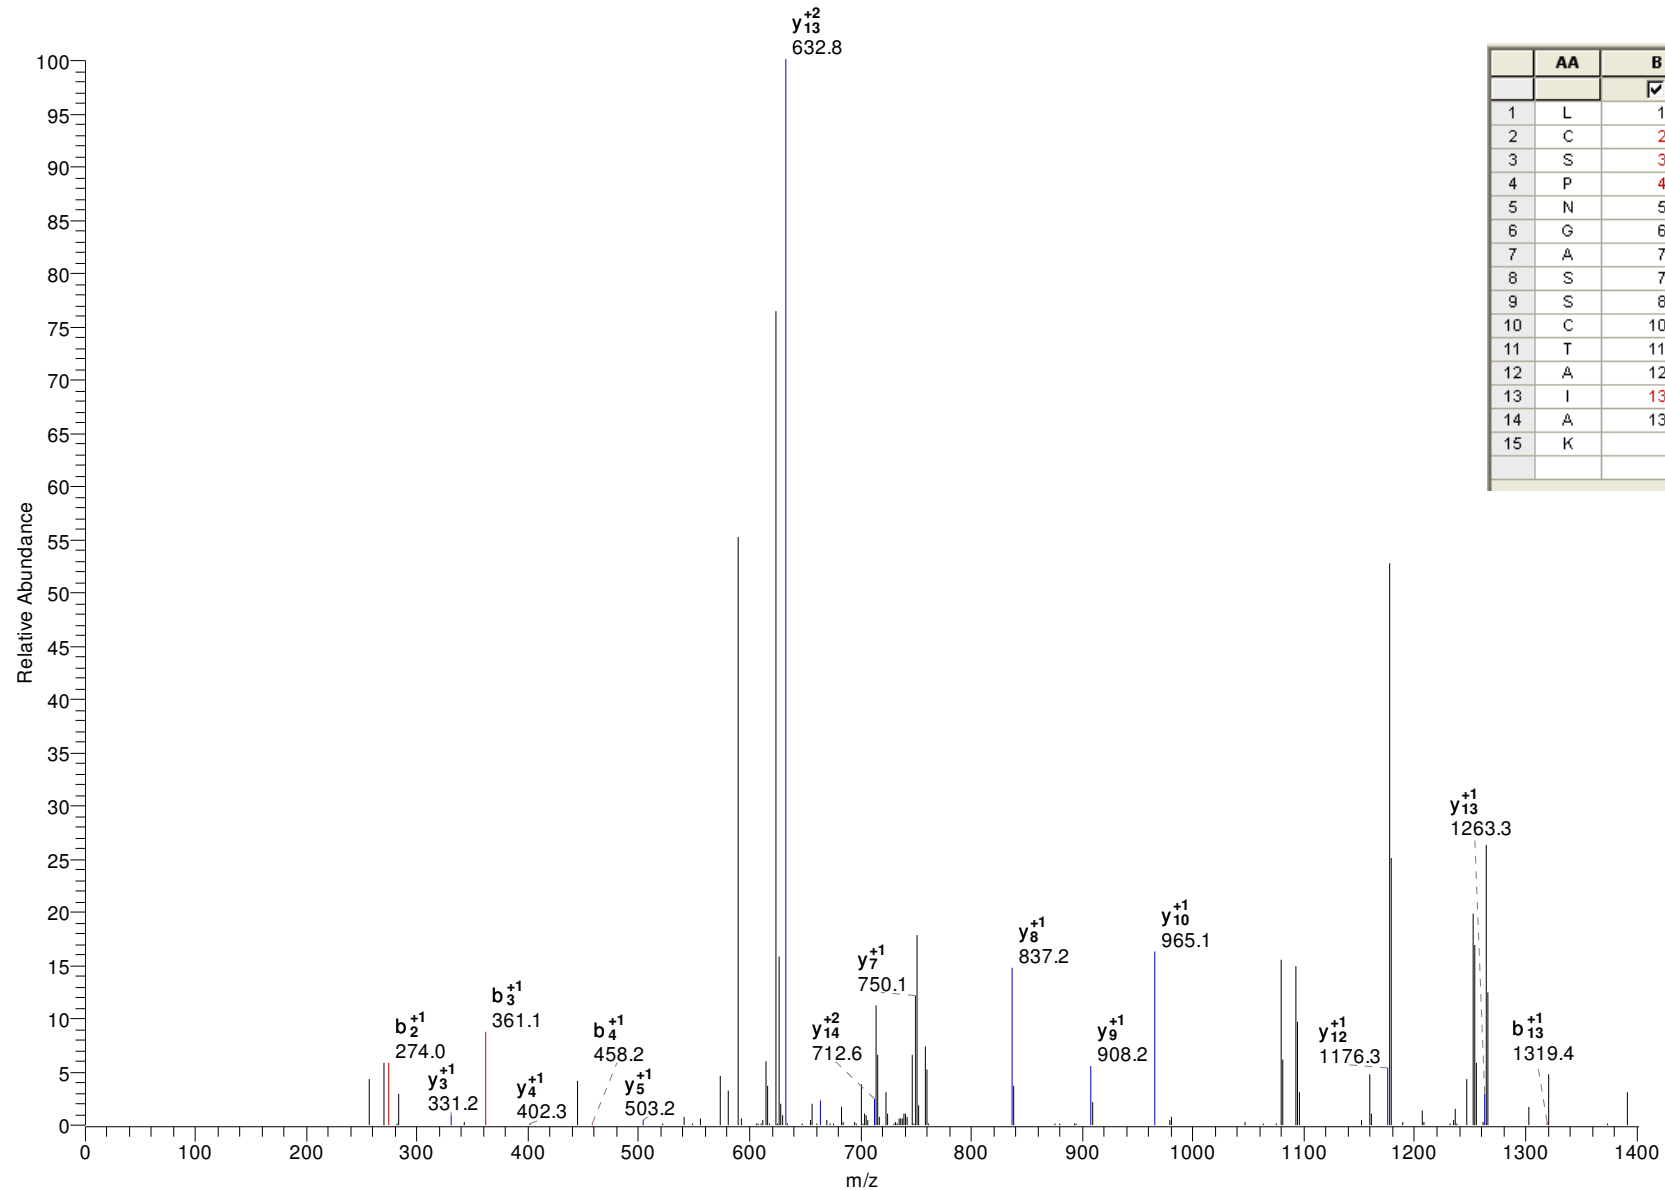

|    | AA | B       | Y       |    |
|----|----|---------|---------|----|
|    |    | ✓       | ✓       |    |
| 1  | L  | 114.09  | -       | 15 |
| 2  | C  | 274.12  | 1423.63 | 14 |
| 3  | S  | 361.15  | 1263.60 | 13 |
| 4  | P  | 458.21  | 1176.57 | 12 |
| 5  | N  | 572.25  | 1079.52 | 11 |
| 6  | G  | 629.27  | 965.47  | 10 |
| 7  | A  | 700.31  | 908.45  | 9  |
| 8  | S  | 787.34  | 837.41  | 8  |
| 9  | S  | 874.37  | 750.38  | 7  |
| 10 | C  | 1034.40 | 663.35  | 6  |
| 11 | T  | 1135.45 | 503.32  | 5  |
| 12 | A  | 1206.49 | 402.27  | 4  |
| 13 | I  | 1319.57 | 331.23  | 3  |
| 14 | A  | 1390.61 | 218.15  | 2  |
| 15 | K  | -       | 147.11  | 1  |

gi|19171158|emb|CAC85916.1| tryparedoxin [Trypanosoma cruzi]

R.GFTPTLVEFYEK.F

P(pep)=8.09E-05

M+H=1430.720215

Xcorr=2.40

DeltaM=1.66142

z=2

DCn=0.44

#5250-5250 NL: 4.69E2

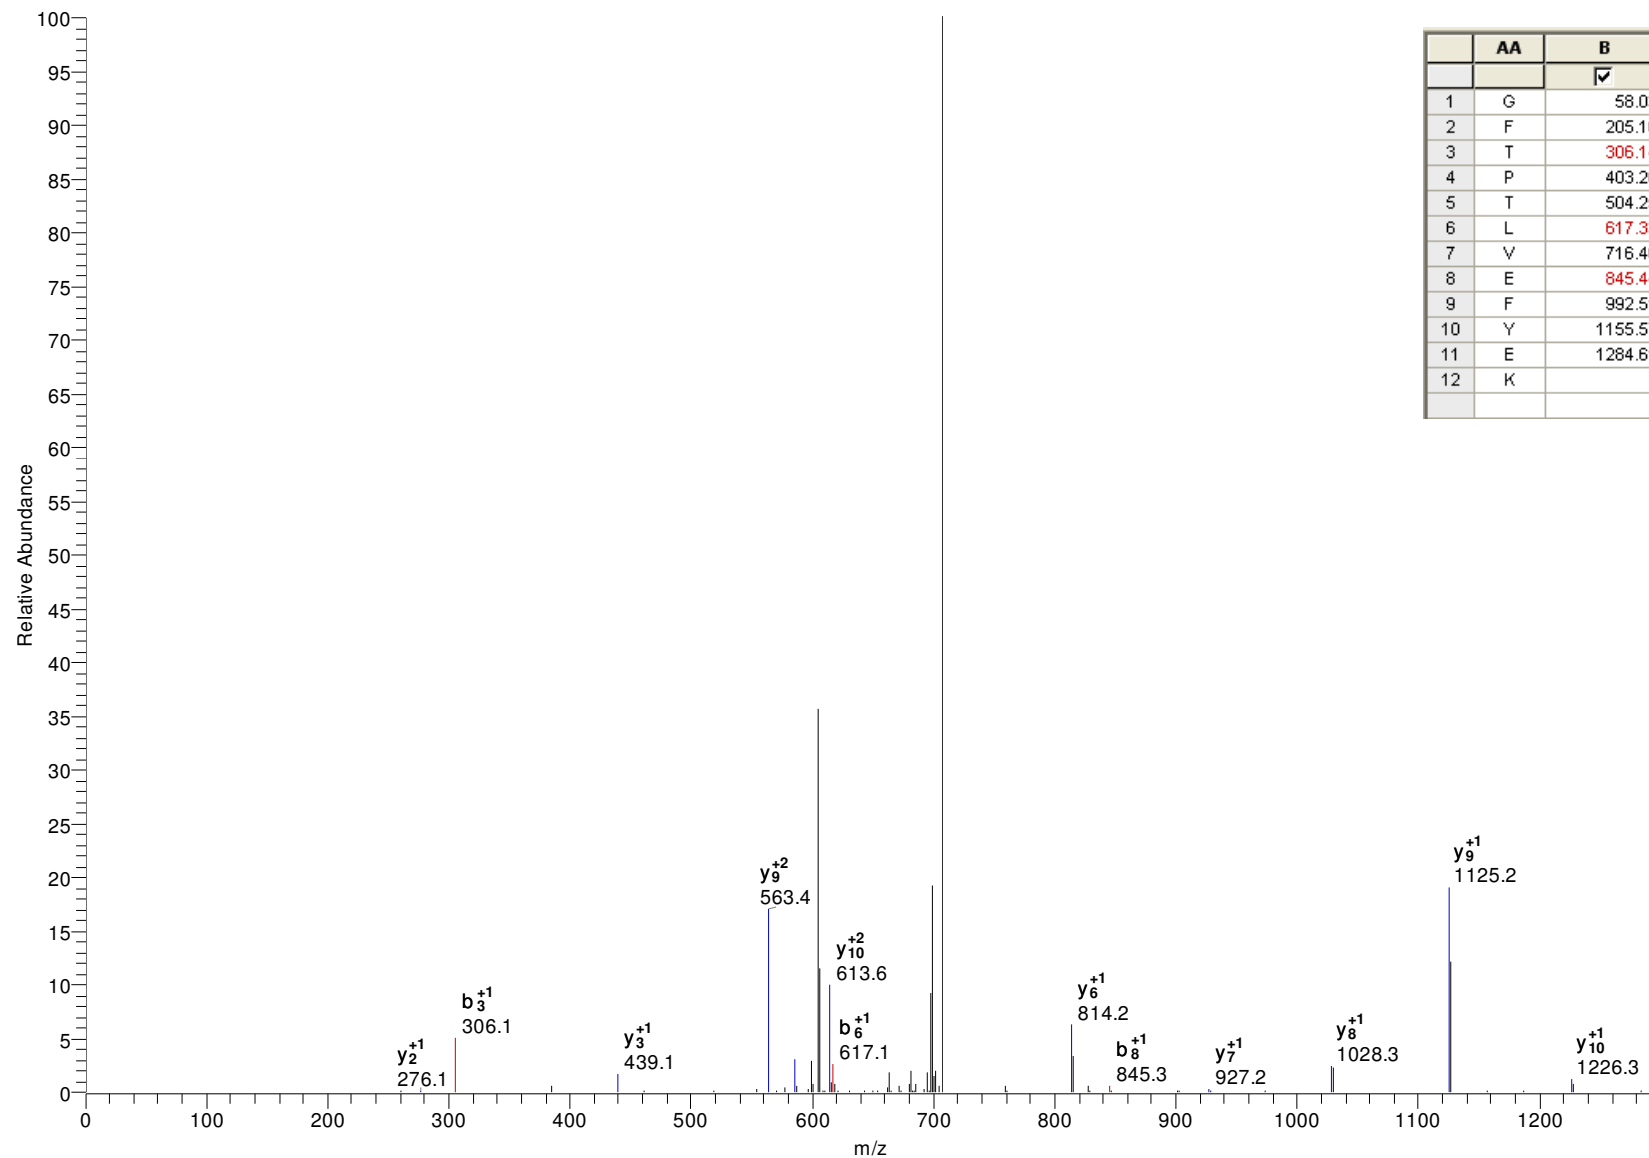

|    | AA | B       | Y       |    |
|----|----|---------|---------|----|
|    |    | ✓       | ✓       |    |
| 1  | G  | 58.03   | -       | 12 |
| 2  | F  | 205.10  | 1373.70 | 11 |
| 3  | T  | 306.14  | 1226.63 | 10 |
| 4  | P  | 403.20  | 1125.58 | 9  |
| 5  | T  | 504.25  | 1028.53 | 8  |
| 6  | L  | 617.33  | 927.48  | 7  |
| 7  | V  | 716.40  | 814.40  | 6  |
| 8  | E  | 845.44  | 715.33  | 5  |
| 9  | F  | 992.51  | 586.29  | 4  |
| 10 | Y  | 1155.57 | 439.22  | 3  |
| 11 | E  | 1284.61 | 276.16  | 2  |
| 12 | K  | -       | 147.11  | 1  |

gi|70873320|gb|EAN87155.1| GPR1/FUN34/yaaH family, putative [Trypanosoma cruzi]

R.TLLPLFPPCIR.R

M+H=1326.760254

DeltaM=0.73589

z=2

P(pep)=0.000991065

Xcorr=2.23

DCn=0.25

#6101-6101 NL:1.14E3

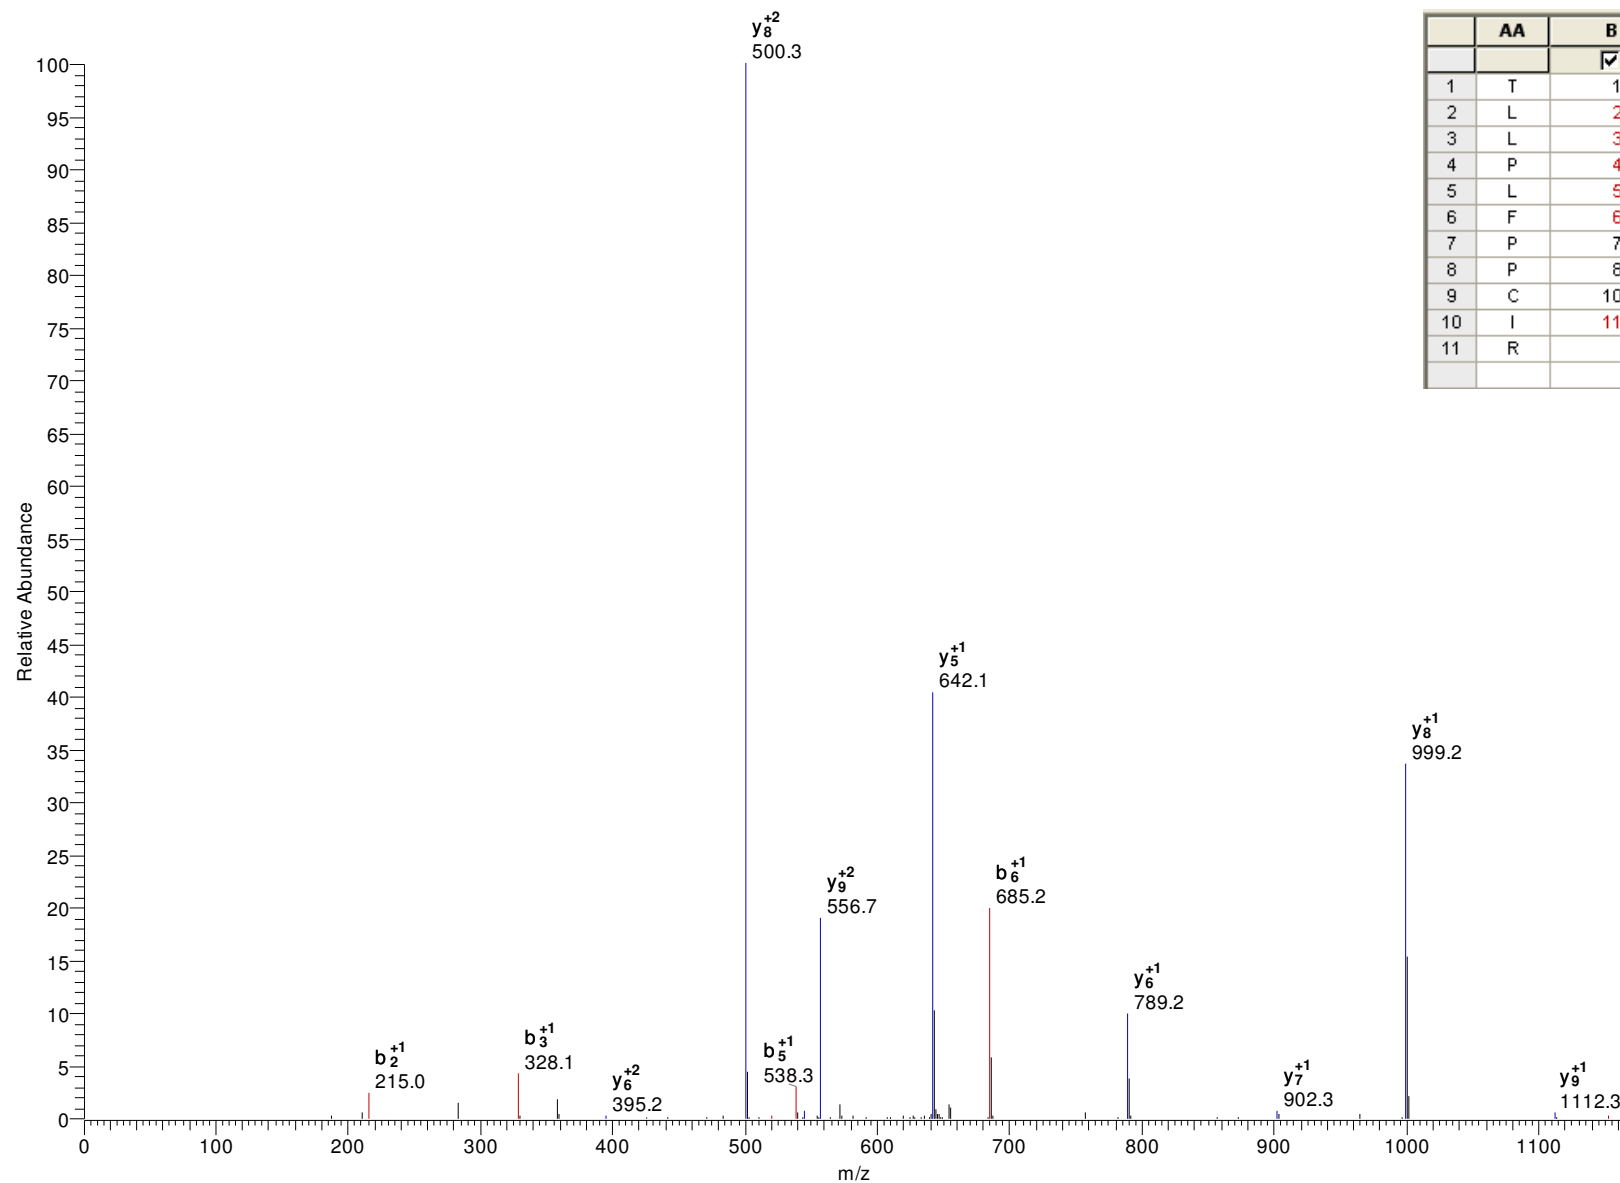

|    | AA | B                                   | Y                                   |    |
|----|----|-------------------------------------|-------------------------------------|----|
|    |    | <input checked="" type="checkbox"/> | <input checked="" type="checkbox"/> |    |
| 1  | T  | 102.05                              | -                                   | 11 |
| 2  | L  | 215.14                              | 1225.71                             | 10 |
| 3  | L  | 328.22                              | 1112.63                             | 9  |
| 4  | P  | 425.28                              | 999.54                              | 8  |
| 5  | L  | 538.36                              | 902.49                              | 7  |
| 6  | F  | 685.43                              | 789.41                              | 6  |
| 7  | P  | 782.48                              | 642.34                              | 5  |
| 8  | P  | 879.53                              | 545.29                              | 4  |
| 9  | C  | 1039.56                             | 448.23                              | 3  |
| 10 | I  | 1152.65                             | 288.20                              | 2  |
| 11 | R  | -                                   | 175.12                              | 1  |



gi|70876860|gb|EAN90267.1| hypothetical protein, conserved [Trypanosoma cruzi]  
 -.AVFQGLSTK.- M+H=950.5305786 DeltaM=1.20250 z=2  
 P(pep)0.000282484 Xcorr=2.17 DCn=0.36

#2779-2779 NL: 5.78E2

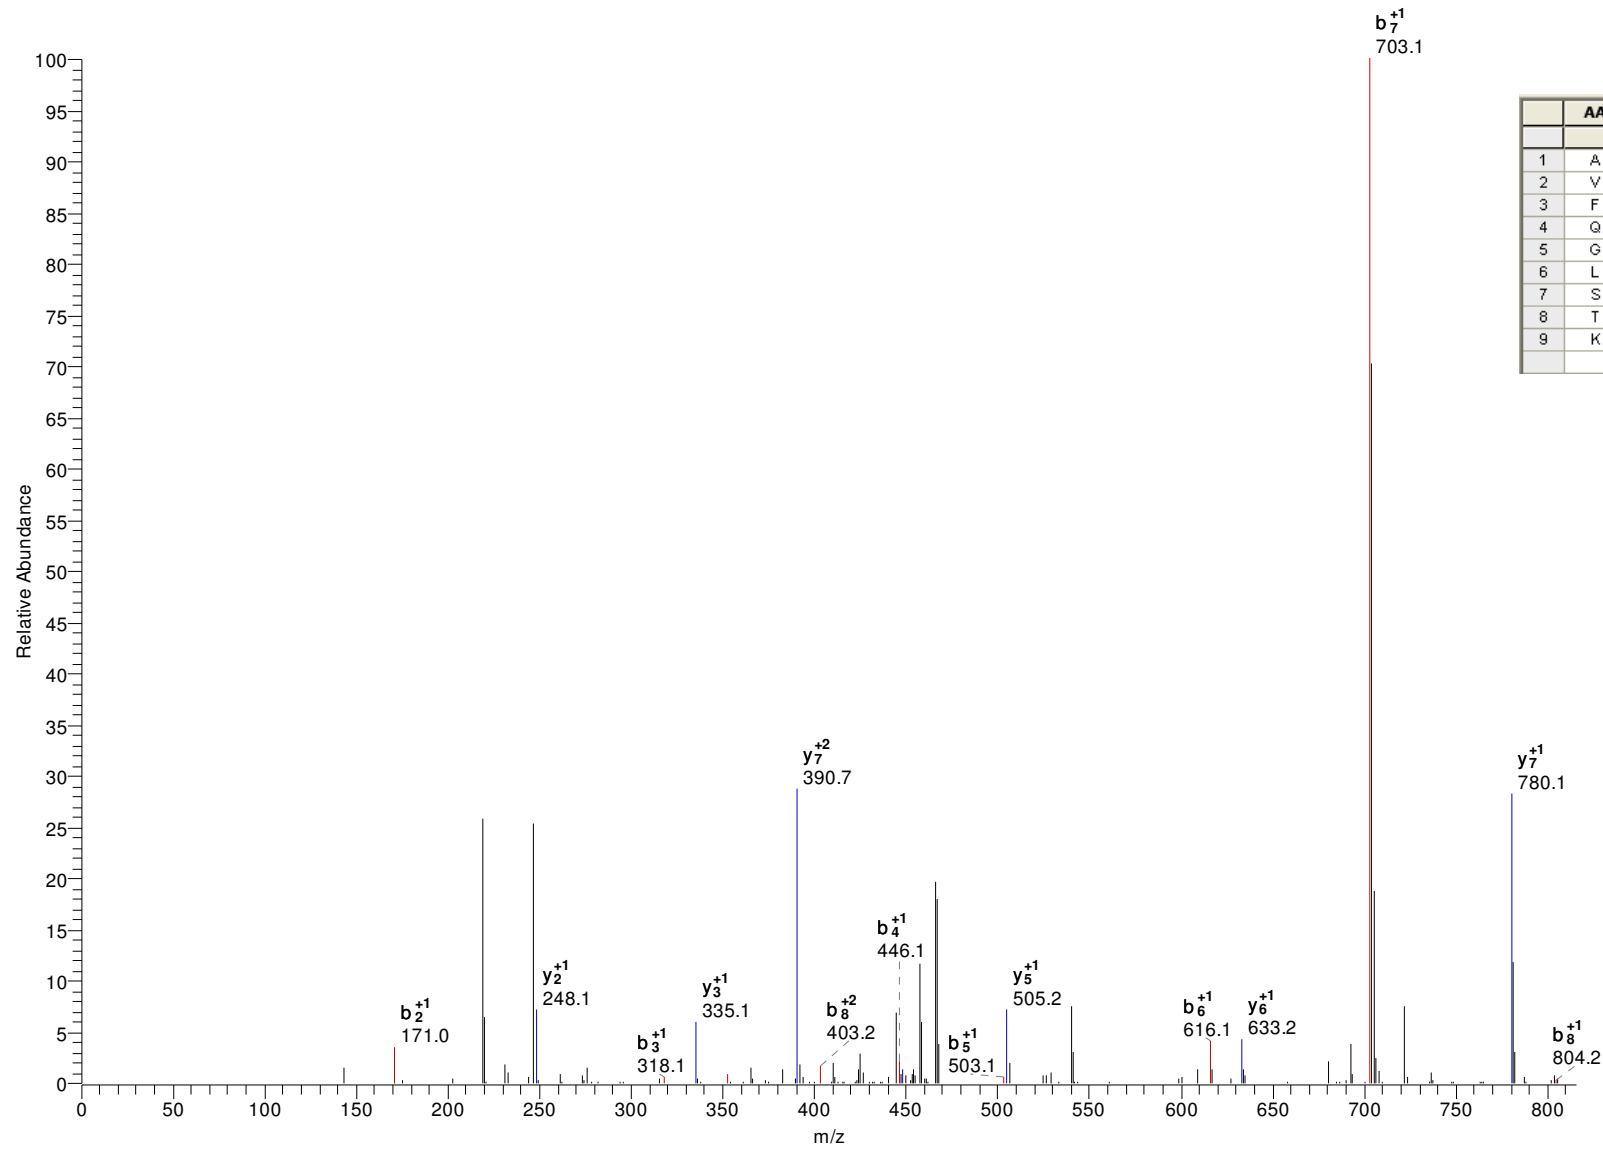

|   | AA | B      | Y      |   |
|---|----|--------|--------|---|
|   |    | ✓      | ✓      |   |
| 1 | A  | 72.04  | -      | 9 |
| 2 | V  | 171.11 | 879.49 | 8 |
| 3 | F  | 318.18 | 780.43 | 7 |
| 4 | Q  | 446.24 | 633.36 | 6 |
| 5 | G  | 503.26 | 505.30 | 5 |
| 6 | L  | 616.35 | 448.28 | 4 |
| 7 | S  | 703.38 | 335.19 | 3 |
| 8 | T  | 804.43 | 248.16 | 2 |
| 9 | K  | -      | 147.11 | 1 |

gi|70886206|gb|EAN98994.1| hypothetical protein, conserved [Trypanosoma cruzi]

-.TGQFVLDDAPK.-

M+H=1190.605225

DeltaM=1.01494

z=2

P(pep)=4.41E-05

Xcorr=2.11

DCn=0.22

#3294-3294 NL: 2.62E2

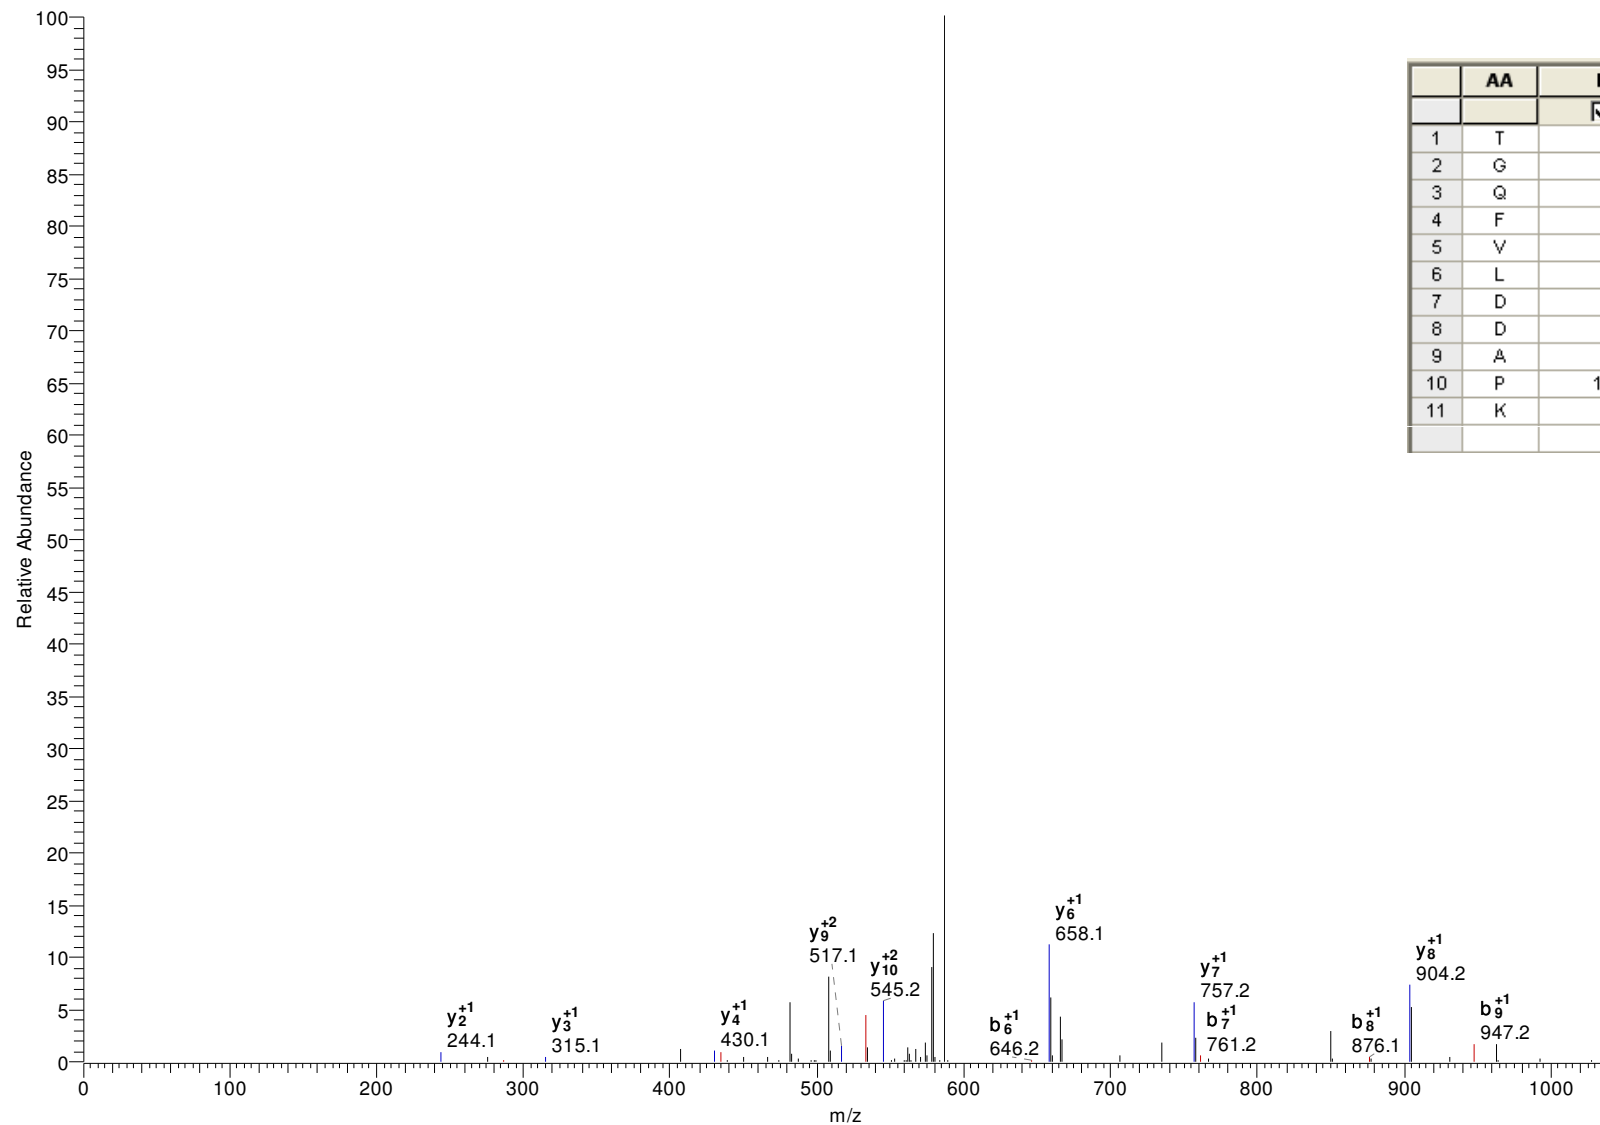

|    | AA | B       | Y       |    |
|----|----|---------|---------|----|
|    |    | ✓       | ✓       |    |
| 1  | T  | 102.05  | -       | 11 |
| 2  | G  | 159.08  | 1089.56 | 10 |
| 3  | Q  | 287.13  | 1032.54 | 9  |
| 4  | F  | 434.20  | 904.48  | 8  |
| 5  | V  | 533.27  | 757.41  | 7  |
| 6  | L  | 646.36  | 658.34  | 6  |
| 7  | D  | 761.38  | 545.26  | 5  |
| 8  | D  | 876.41  | 430.23  | 4  |
| 9  | A  | 947.45  | 315.20  | 3  |
| 10 | P  | 1044.50 | 244.17  | 2  |
| 11 | K  | -       | 147.11  | 1  |

gi|70877369|gb|EAN90722.1| hypothetical protein, conserved [Trypanosoma cruzi]

R.LCELYELLR.D

M+H=1208.634399

DeltaM=1.40215

z=2

P(pep)=0.000799388

Xcorr=3.44

DCn=0.18

#4903-4903 NL: 1.77E2

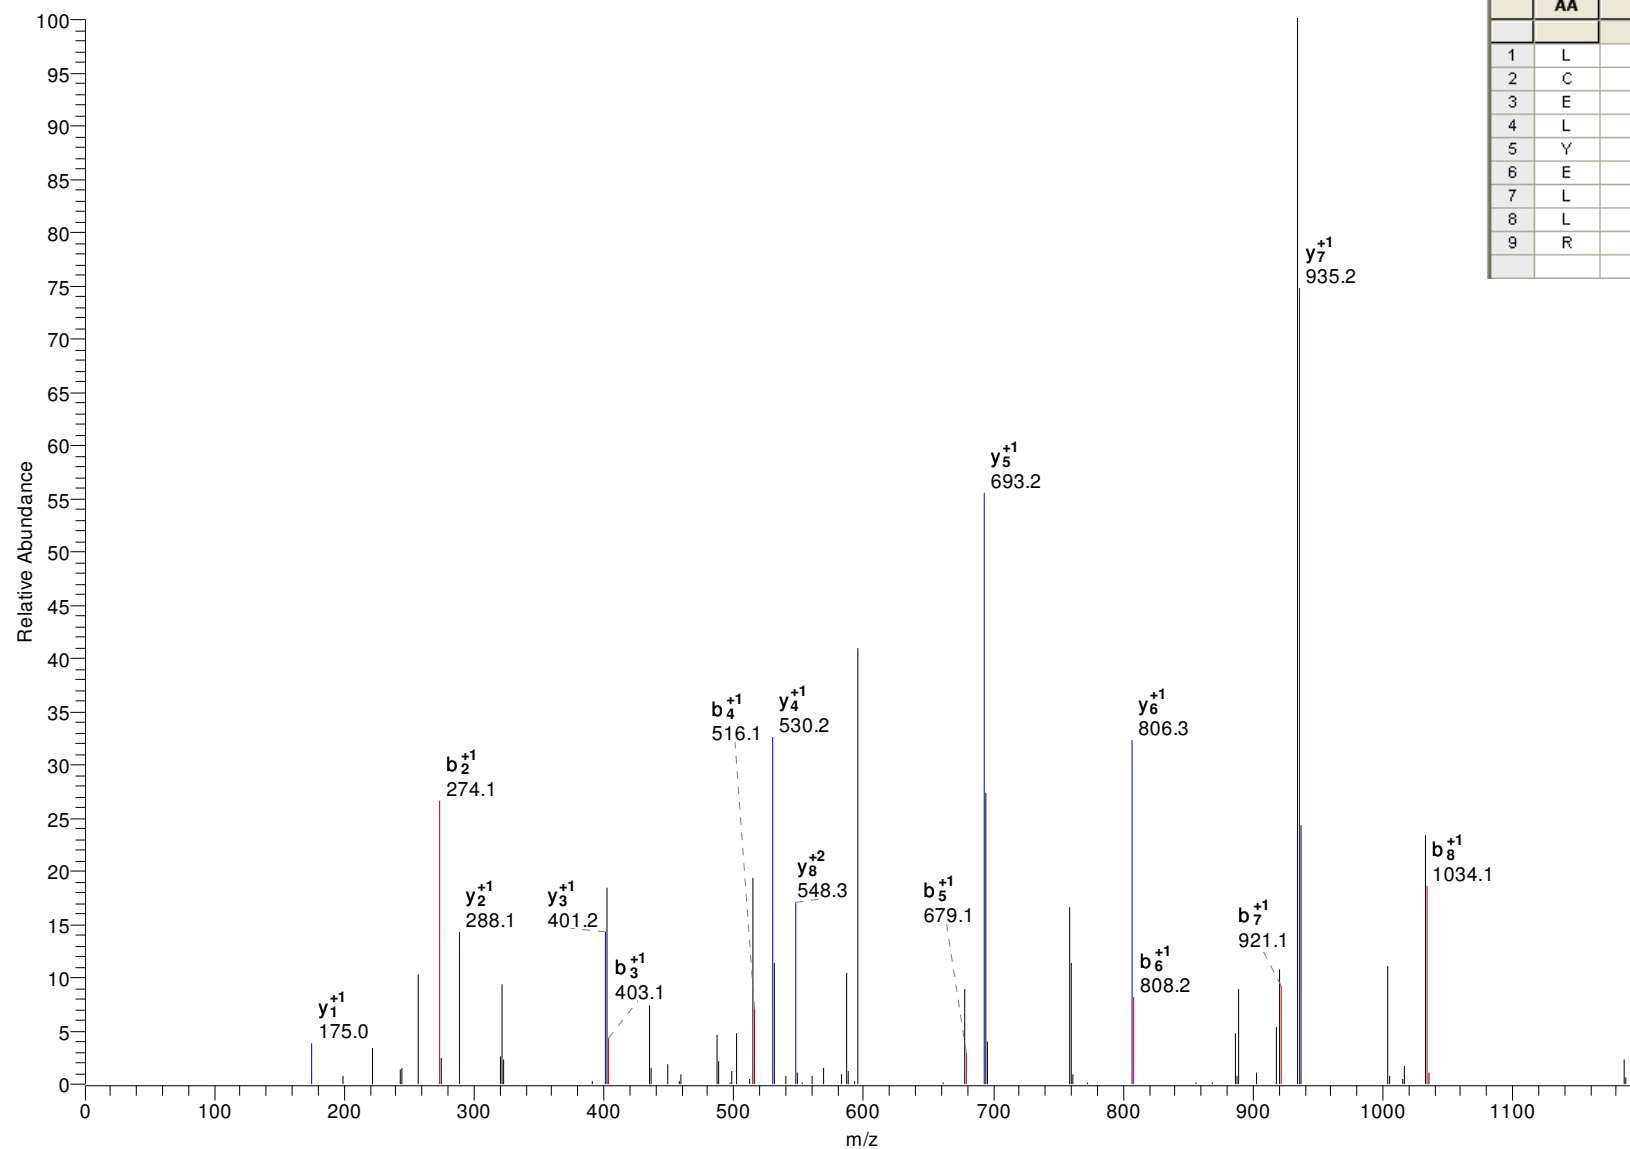

|   | AA | B       | Y       |   |
|---|----|---------|---------|---|
|   |    | ✓       | ✓       |   |
| 1 | L  | 114.09  | -       | 9 |
| 2 | C  | 274.12  | 1095.55 | 8 |
| 3 | E  | 403.16  | 935.52  | 7 |
| 4 | L  | 516.25  | 806.48  | 6 |
| 5 | Y  | 679.31  | 693.39  | 5 |
| 6 | E  | 808.35  | 530.33  | 4 |
| 7 | L  | 921.44  | 401.29  | 3 |
| 8 | L  | 1034.52 | 288.20  | 2 |
| 9 | R  | -       | 175.12  | 1 |

gi|70877823|gb|EAN91132.1| hypothetical protein, conserved [Trypanosoma cruzi]

R.FQEMSDTIITR.I

M+H=1340.651489

DeltaM=0.14543

z=2

P(pep)=0.000324736

Xcorr=2.27

DCn=0.11

#3118-3118 NL: 1.30E2

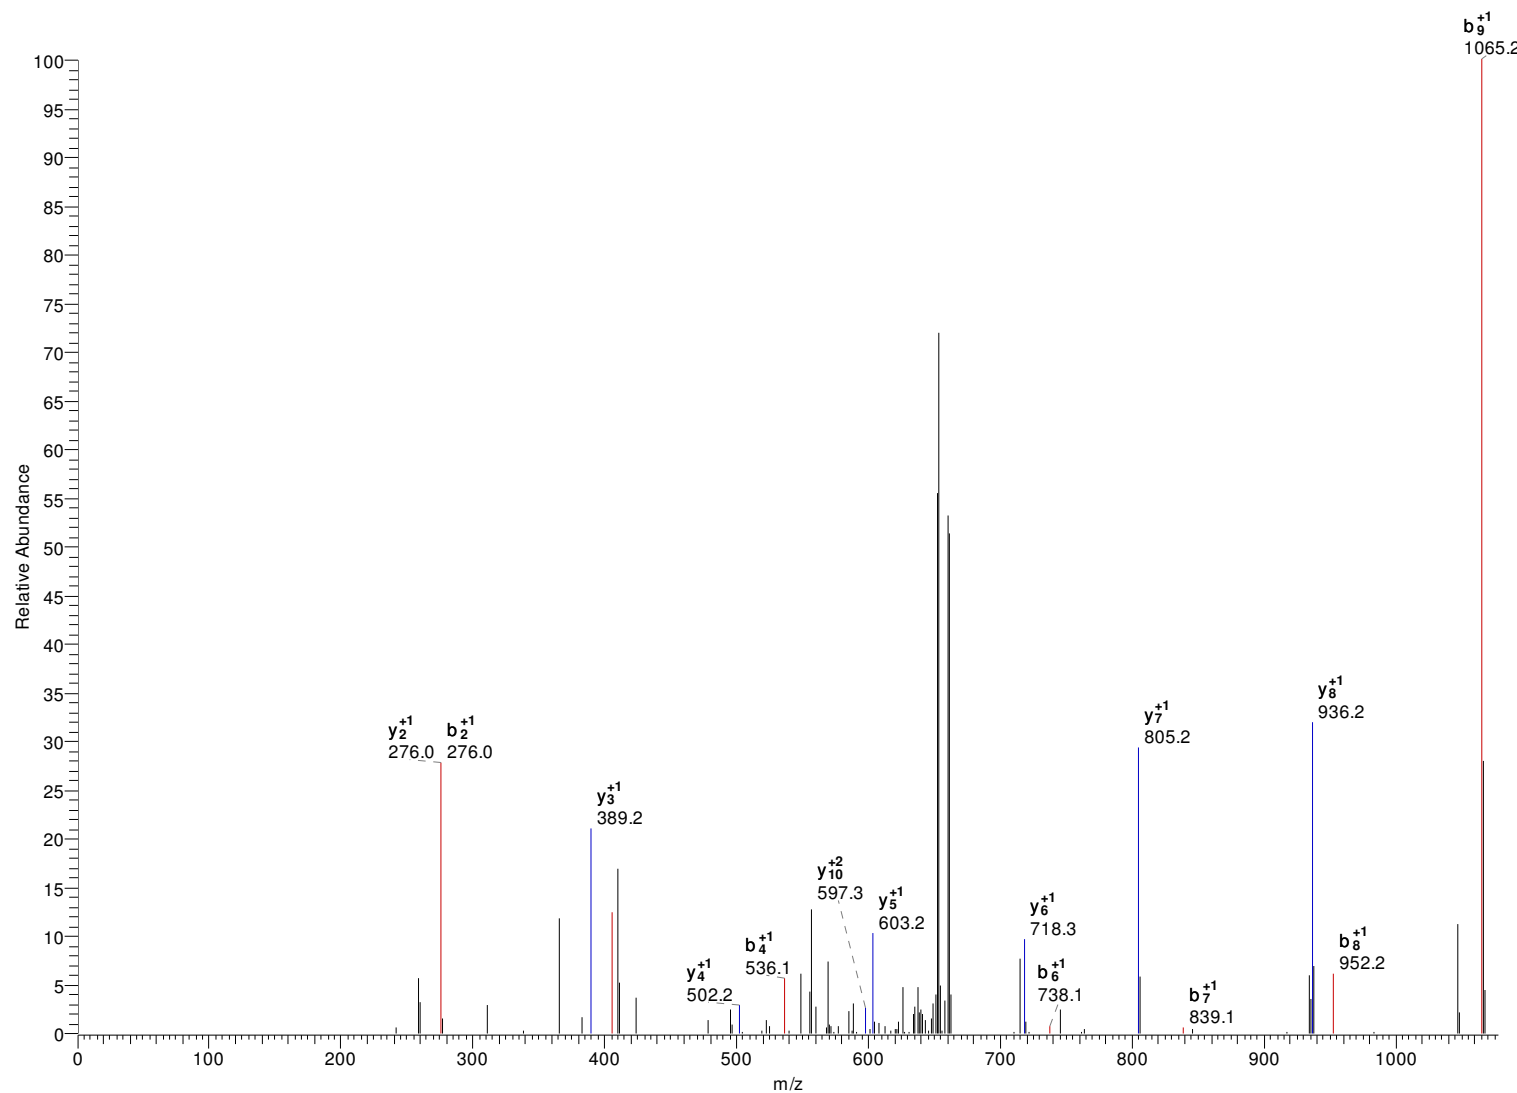

|    | AA | B       | Y       |    |
|----|----|---------|---------|----|
|    |    | ✓       | ✓       |    |
| 1  | F  | 148.08  | -       | 11 |
| 2  | Q  | 276.13  | 1193.58 | 10 |
| 3  | E  | 405.18  | 1065.52 | 9  |
| 4  | M  | 536.22  | 936.48  | 8  |
| 5  | S  | 623.25  | 805.44  | 7  |
| 6  | D  | 738.28  | 718.41  | 6  |
| 7  | T  | 839.32  | 603.38  | 5  |
| 8  | I  | 952.41  | 502.33  | 4  |
| 9  | i  | 1065.43 | 389.25  | 3  |
| 10 | T  | 1166.54 | 276.17  | 2  |
| 11 | R  | -       | 175.12  | 1  |

gi|70881464|gb|EAN94492.1| protein tyrosine phosphatase, putative [Trypanosoma cruzi]

R.VCGPTYDASQLEK.D

M+H=1467.678467

DeltaM=0.43413

z=2

P(pep)=1.20E-08

Xcorr=4.32E+00

DCn=0.54

#2447-2447 NL: 1.88E2

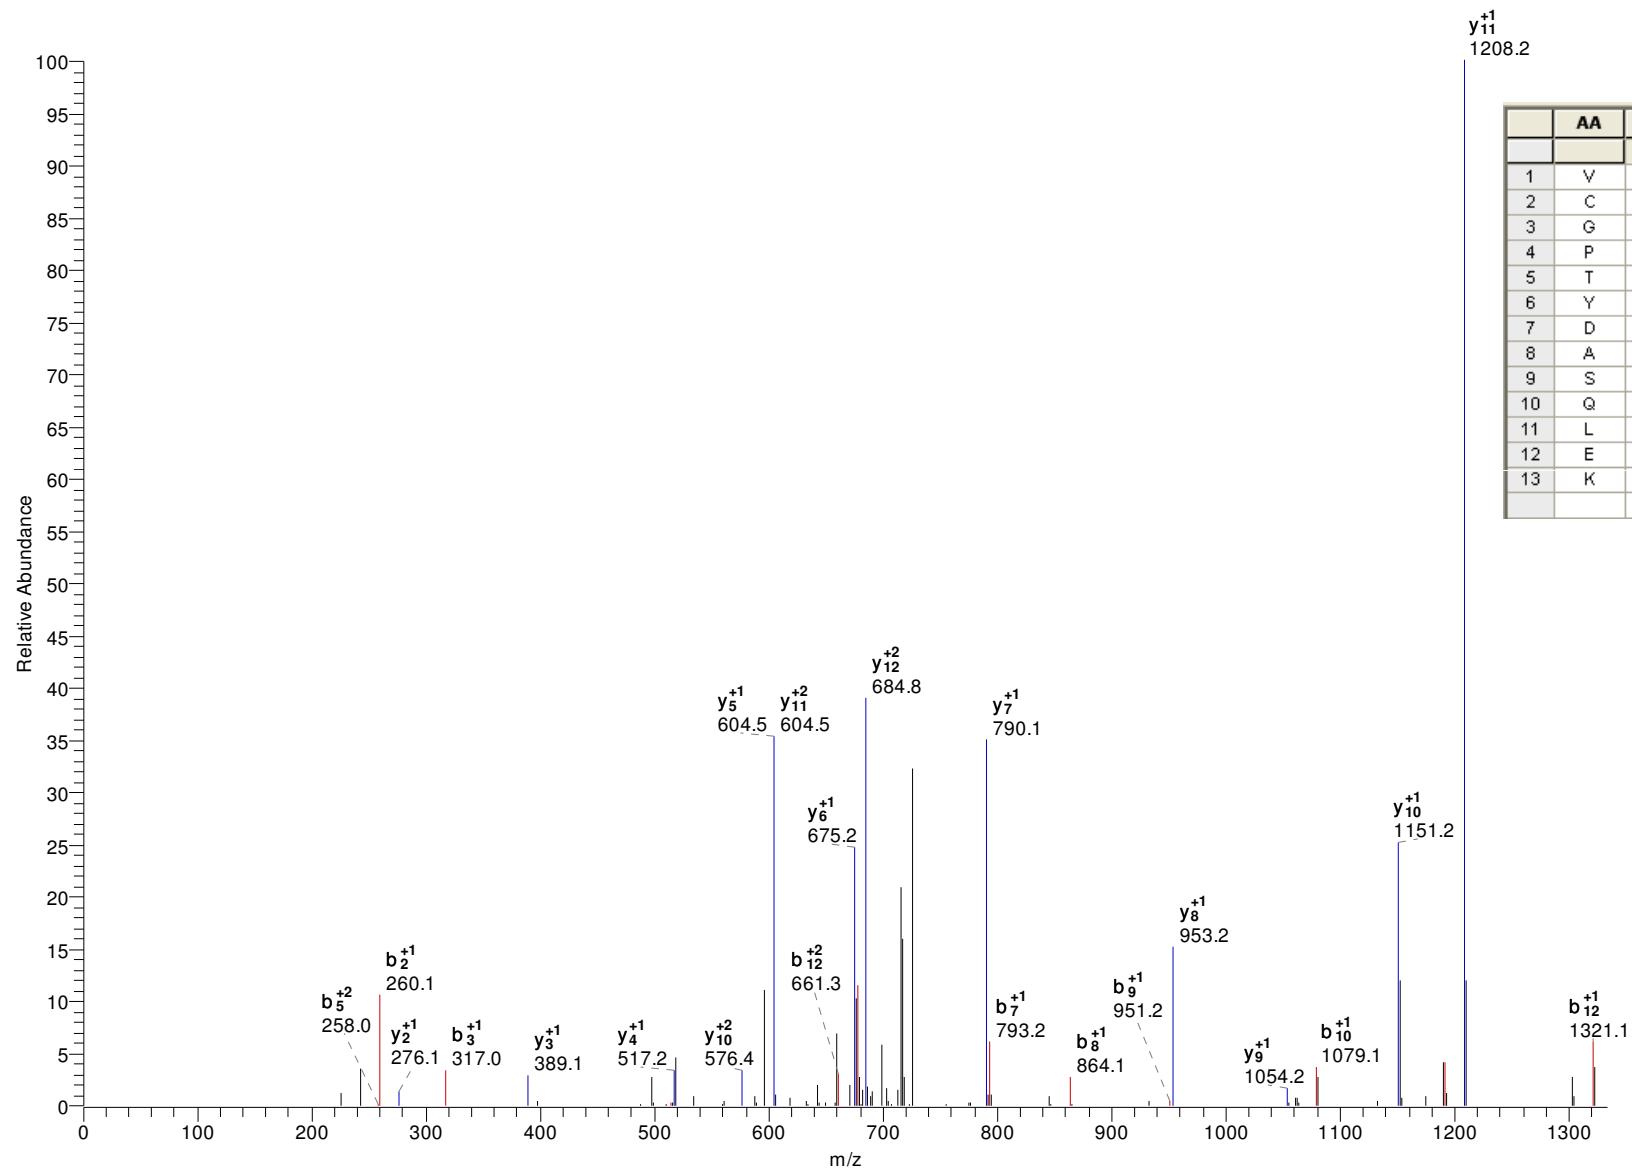

|    | AA | B       | Y       |    |
|----|----|---------|---------|----|
|    |    | ✓       | ✓       |    |
| 1  | V  | 100.08  | -       | 13 |
| 2  | C  | 260.11  | 1368.61 | 12 |
| 3  | G  | 317.13  | 1208.58 | 11 |
| 4  | P  | 414.18  | 1151.56 | 10 |
| 5  | T  | 515.23  | 1054.51 | 9  |
| 6  | Y  | 678.29  | 953.46  | 8  |
| 7  | D  | 793.32  | 790.39  | 7  |
| 8  | A  | 864.36  | 675.37  | 6  |
| 9  | S  | 951.39  | 604.33  | 5  |
| 10 | Q  | 1079.45 | 517.30  | 4  |
| 11 | L  | 1192.53 | 389.24  | 3  |
| 12 | E  | 1321.57 | 276.16  | 2  |
| 13 | K  | -       | 147.11  | 1  |

gi|70880722|gb|EAN93801.1| hypothetical protein, conserved [Trypanosoma cruzi]  
 R.RGEVEAAEEAGVLLPSESEFDVTSLHAALENR.E M+H=3496.718994 DeltaM=0.92942  
 z=3 P(pep)=1.00E-30 Xcorr=5.51 DCn=0.57

#5652-5652 NL: 4.09E1

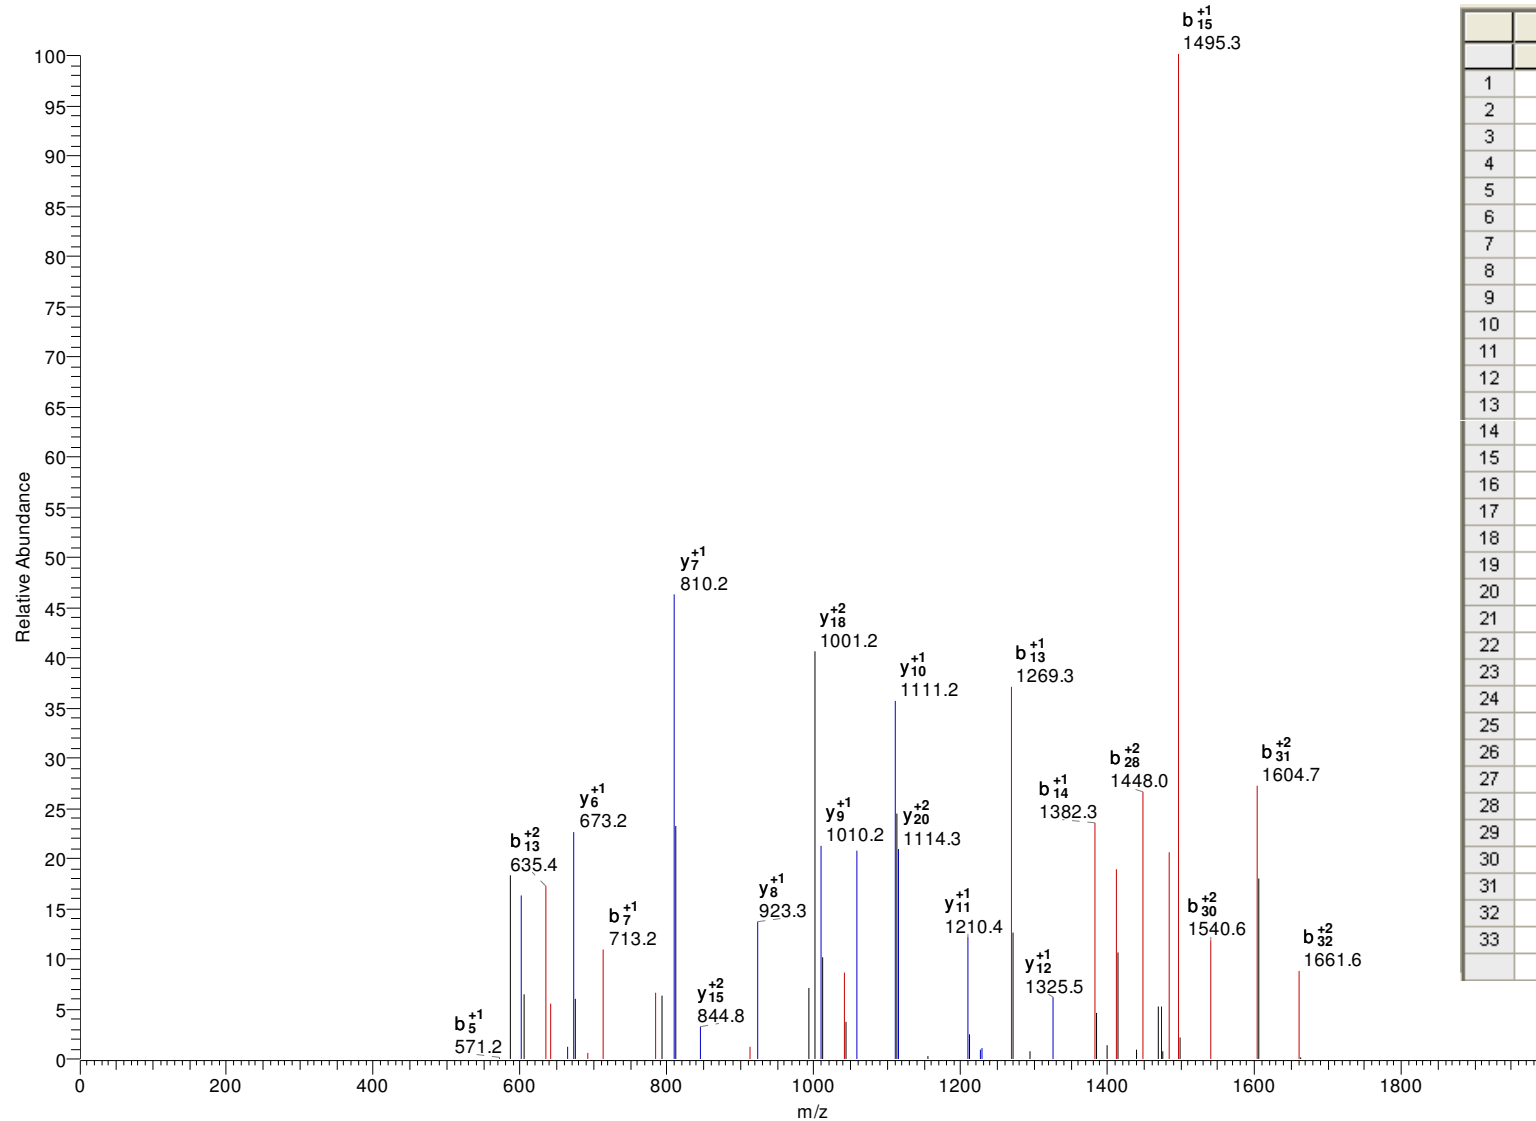

|    | AA | B                                   | Y                                   |    |
|----|----|-------------------------------------|-------------------------------------|----|
|    |    | <input checked="" type="checkbox"/> | <input checked="" type="checkbox"/> |    |
| 1  | R  | 157.11                              | -                                   | 33 |
| 2  | G  | 214.13                              | 3340.62                             | 32 |
| 3  | E  | 343.17                              | 3283.60                             | 31 |
| 4  | V  | 442.24                              | 3154.55                             | 30 |
| 5  | E  | 571.28                              | 3055.49                             | 29 |
| 6  | A  | 642.32                              | 2926.44                             | 28 |
| 7  | A  | 713.36                              | 2855.41                             | 27 |
| 8  | A  | 784.39                              | 2784.37                             | 26 |
| 9  | E  | 913.44                              | 2713.33                             | 25 |
| 10 | E  | 1042.48                             | 2584.29                             | 24 |
| 11 | A  | 1113.52                             | 2455.25                             | 23 |
| 12 | G  | 1170.54                             | 2384.21                             | 22 |
| 13 | V  | 1269.61                             | 2327.19                             | 21 |
| 14 | L  | 1382.69                             | 2228.12                             | 20 |
| 15 | L  | 1495.78                             | 2115.04                             | 19 |
| 16 | P  | 1592.83                             | 2001.95                             | 18 |
| 17 | S  | 1679.86                             | 1904.90                             | 17 |
| 18 | E  | 1808.90                             | 1817.87                             | 16 |
| 19 | S  | 1895.93                             | 1688.82                             | 15 |
| 20 | E  | 2024.98                             | 1601.79                             | 14 |
| 21 | F  | 2172.05                             | 1472.75                             | 13 |
| 22 | D  | 2287.07                             | 1325.68                             | 12 |
| 23 | V  | 2386.14                             | 1210.65                             | 11 |
| 24 | T  | 2487.19                             | 1111.59                             | 10 |
| 25 | S  | 2574.22                             | 1010.54                             | 9  |
| 26 | L  | 2687.30                             | 923.51                              | 8  |
| 27 | H  | 2824.36                             | 810.42                              | 7  |
| 28 | A  | 2895.40                             | 673.36                              | 6  |
| 29 | A  | 2966.44                             | 602.33                              | 5  |
| 30 | L  | 3079.52                             | 531.29                              | 4  |
| 31 | E  | 3208.56                             | 418.20                              | 3  |
| 32 | N  | 3322.61                             | 289.16                              | 2  |
| 33 | R  | -                                   | 175.12                              | 1  |

gi|70884484|gb|EAN97342.1| hypothetical protein, conserved [Trypanosoma cruzi]  
 R.AGSEPDENVVVDSADLR.H M+H=1871.898071 DeltaM=1.20281 z=2  
 P(pep)=2.43E-09 Xcorr=5.42 DCn=0.61

#3655-3655 NL: 2.17E2

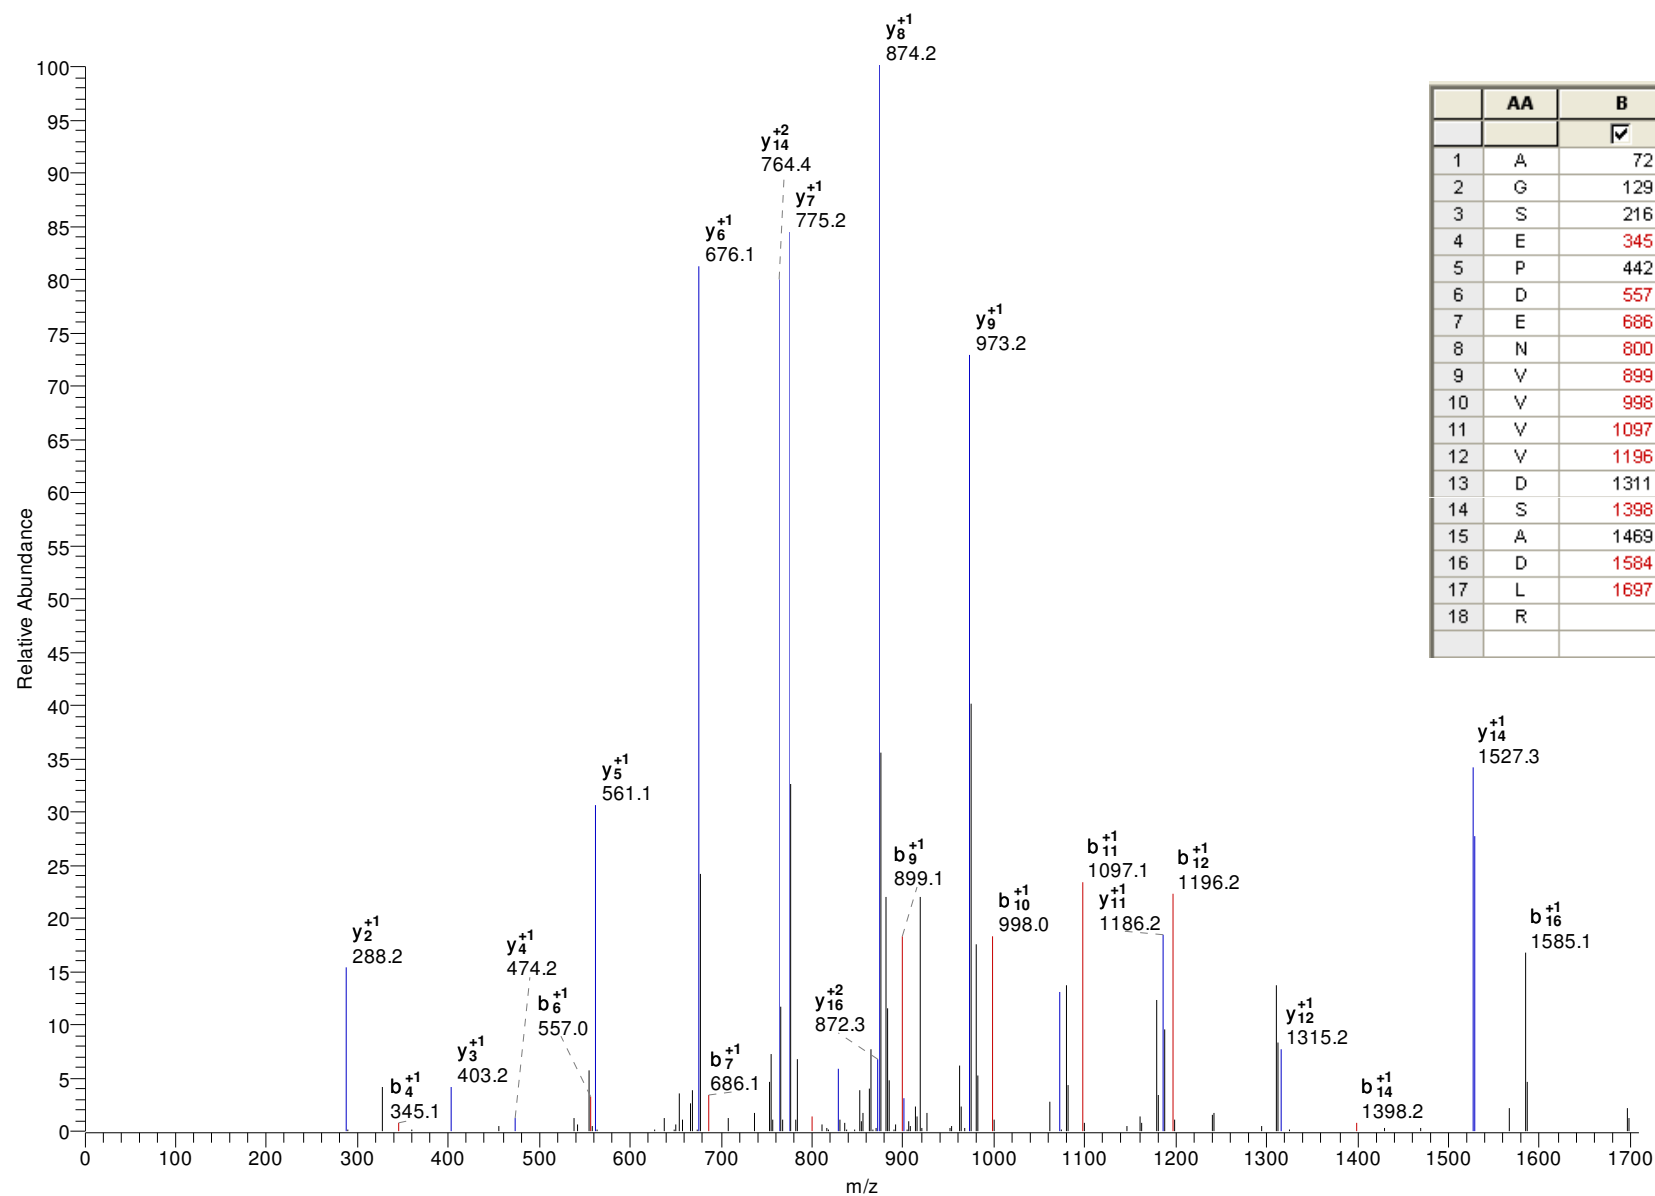

|    | AA | B                                   | Y                                   |    |
|----|----|-------------------------------------|-------------------------------------|----|
|    |    | <input checked="" type="checkbox"/> | <input checked="" type="checkbox"/> |    |
| 1  | A  | 72.04                               | -                                   | 18 |
| 2  | G  | 129.07                              | 1800.86                             | 17 |
| 3  | S  | 216.10                              | 1743.84                             | 16 |
| 4  | E  | 345.14                              | 1656.81                             | 15 |
| 5  | P  | 442.19                              | 1527.76                             | 14 |
| 6  | D  | 557.22                              | 1430.71                             | 13 |
| 7  | E  | 686.26                              | 1315.69                             | 12 |
| 8  | N  | 800.31                              | 1186.64                             | 11 |
| 9  | V  | 899.37                              | 1072.60                             | 10 |
| 10 | V  | 998.44                              | 973.53                              | 9  |
| 11 | V  | 1097.51                             | 874.46                              | 8  |
| 12 | V  | 1196.58                             | 775.39                              | 7  |
| 13 | D  | 1311.61                             | 676.33                              | 6  |
| 14 | S  | 1398.64                             | 561.30                              | 5  |
| 15 | A  | 1469.68                             | 474.27                              | 4  |
| 16 | D  | 1584.70                             | 403.23                              | 3  |
| 17 | L  | 1697.79                             | 288.20                              | 2  |
| 18 | R  | -                                   | 175.12                              | 1  |

gi|1177696|emb|CAA90898.1| F29 [Trypanosoma cruzi]

K.LCYDEVYSGCLEVLK.L

M+H=1847.855469

DeltaM=1.93706

z=2

P(pep)=1.70E-08

Xcorr=5.40

DCn=0.55

#4759-4759 NL: 3.35E2

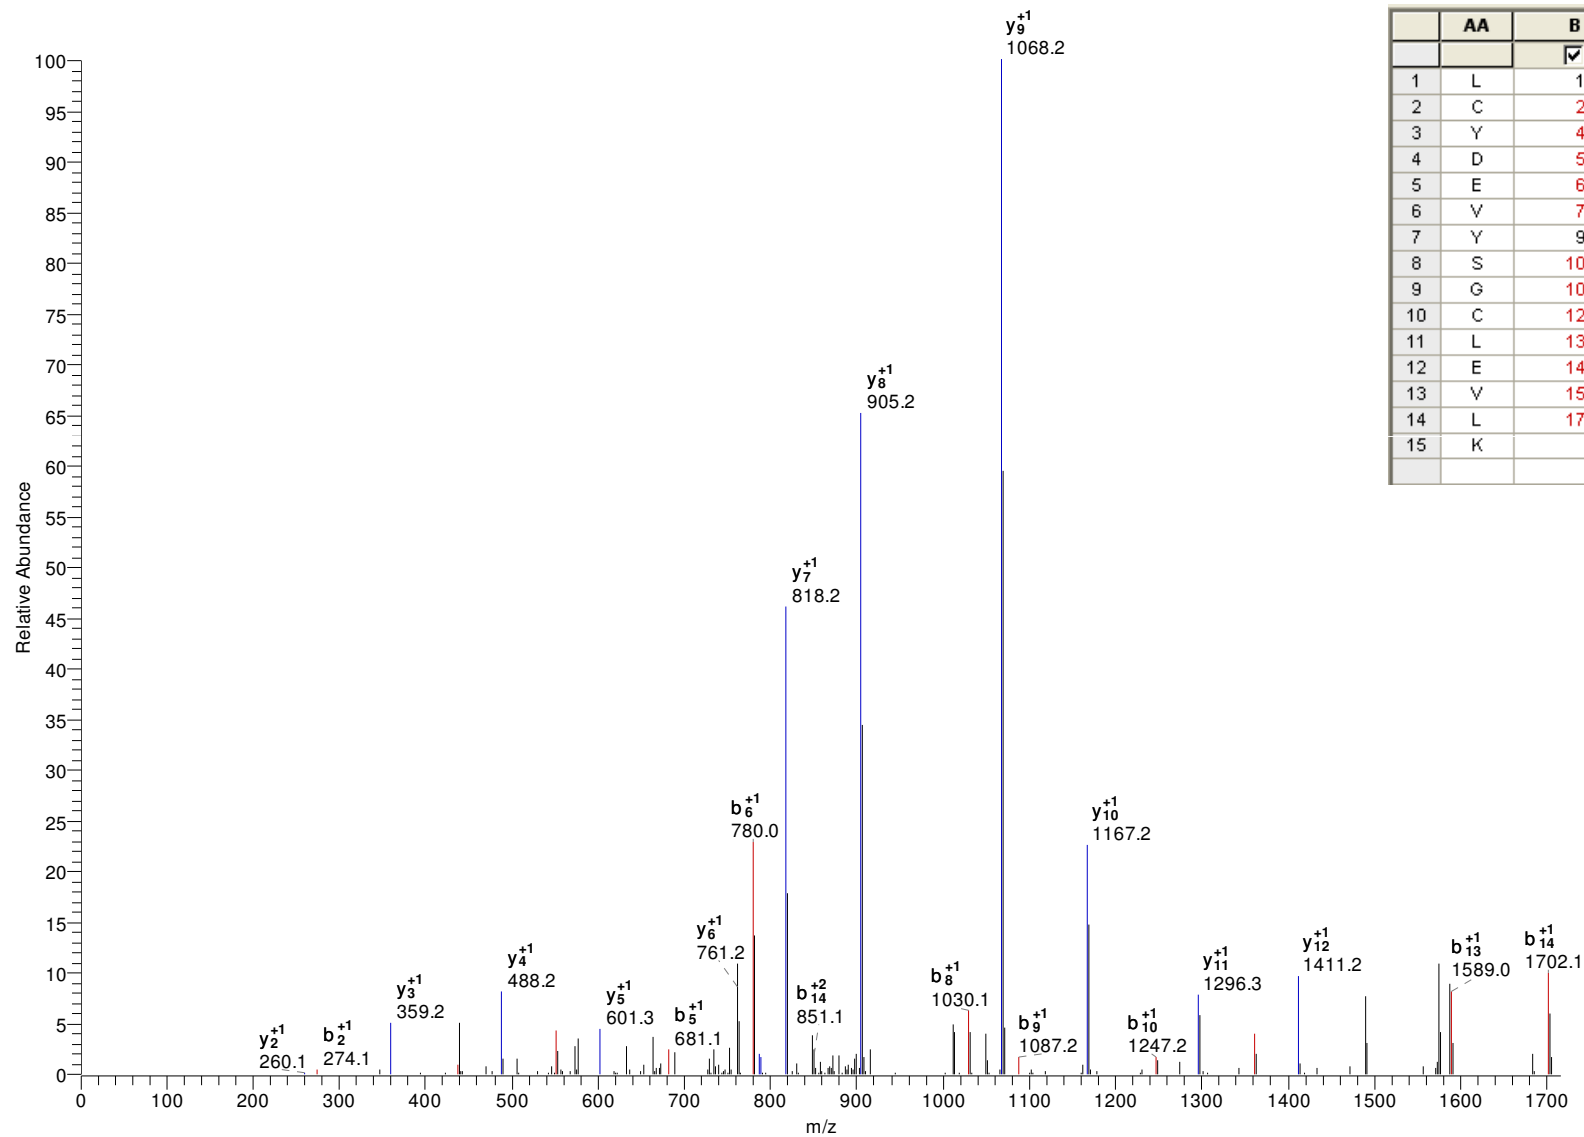

|    | AA | B                                   | Y                                   |    |
|----|----|-------------------------------------|-------------------------------------|----|
|    |    | <input checked="" type="checkbox"/> | <input checked="" type="checkbox"/> |    |
| 1  | L  | 114.09                              | -                                   | 15 |
| 2  | C  | 274.12                              | 1734.77                             | 14 |
| 3  | Y  | 437.19                              | 1574.74                             | 13 |
| 4  | D  | 552.21                              | 1411.68                             | 12 |
| 5  | E  | 681.25                              | 1296.65                             | 11 |
| 6  | V  | 780.32                              | 1167.61                             | 10 |
| 7  | Y  | 943.39                              | 1068.54                             | 9  |
| 8  | S  | 1030.42                             | 905.48                              | 8  |
| 9  | G  | 1087.44                             | 818.44                              | 7  |
| 10 | C  | 1247.47                             | 761.42                              | 6  |
| 11 | L  | 1360.55                             | 601.39                              | 5  |
| 12 | E  | 1489.60                             | 488.31                              | 4  |
| 13 | V  | 1588.67                             | 359.27                              | 3  |
| 14 | L  | 1701.75                             | 260.20                              | 2  |
| 15 | K  | -                                   | 147.11                              | 1  |



gi|70882982|gb|EAN95920.1| serine carboxypeptidase (CBP1), putative [Trypanosoma cruzi]

K.LFVVGESYGGHYAPATAHYINK.A

M+H=2394.187744

DeltaM=1.65555

z=3

P(pep)=1.23E-13

Xcorr=4.98

DCn=0.59

#3797-3797 NL: 4.21E2

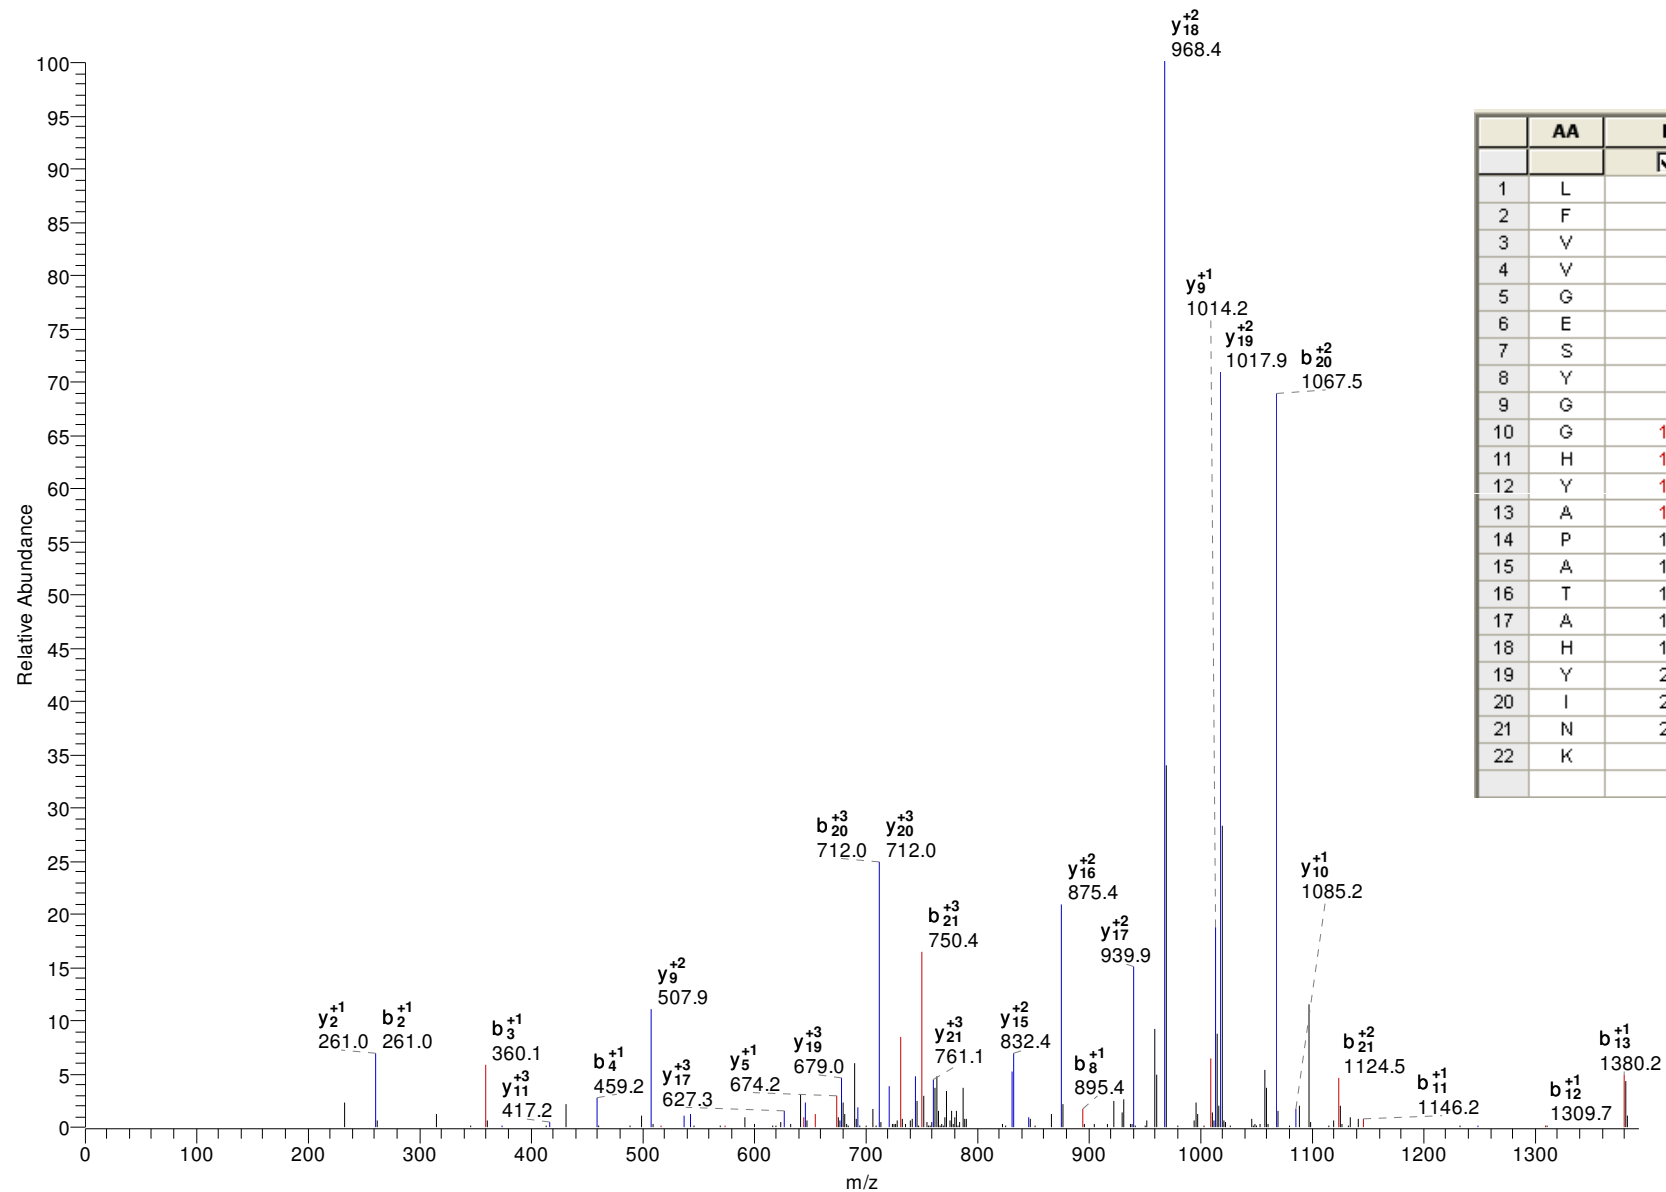

|    | AA | B                                   | Y                                   |    |
|----|----|-------------------------------------|-------------------------------------|----|
|    |    | <input checked="" type="checkbox"/> | <input checked="" type="checkbox"/> |    |
| 1  | L  | 114.09                              | -                                   | 22 |
| 2  | F  | 261.16                              | 2281.10                             | 21 |
| 3  | V  | 360.23                              | 2134.04                             | 20 |
| 4  | V  | 459.30                              | 2034.97                             | 19 |
| 5  | G  | 516.32                              | 1935.90                             | 18 |
| 6  | E  | 645.36                              | 1878.88                             | 17 |
| 7  | S  | 732.39                              | 1749.83                             | 16 |
| 8  | Y  | 895.46                              | 1662.80                             | 15 |
| 9  | G  | 952.48                              | 1499.74                             | 14 |
| 10 | G  | 1009.50                             | 1442.72                             | 13 |
| 11 | H  | 1146.56                             | 1385.70                             | 12 |
| 12 | Y  | 1309.62                             | 1248.64                             | 11 |
| 13 | A  | 1380.66                             | 1085.57                             | 10 |
| 14 | P  | 1477.71                             | 1014.54                             | 9  |
| 15 | A  | 1548.75                             | 917.48                              | 8  |
| 16 | T  | 1649.80                             | 846.45                              | 7  |
| 17 | A  | 1720.83                             | 745.40                              | 6  |
| 18 | H  | 1857.89                             | 674.36                              | 5  |
| 19 | Y  | 2020.96                             | 537.30                              | 4  |
| 20 | I  | 2134.04                             | 374.24                              | 3  |
| 21 | N  | 2248.08                             | 261.16                              | 2  |
| 22 | K  | -                                   | 147.11                              | 1  |

gi|70879974|gb|EAN93104.1| hypothetical protein, conserved [Trypanosoma cruzi]

K.GLSHEDATTIVNIISK.D

M+H=1697.90686

DeltaM=0.55681

z=2

P(pep)=6.82E-09

Xcorr=4.43E

DCn=0.54

#4435-4435 NL: 4.72E1

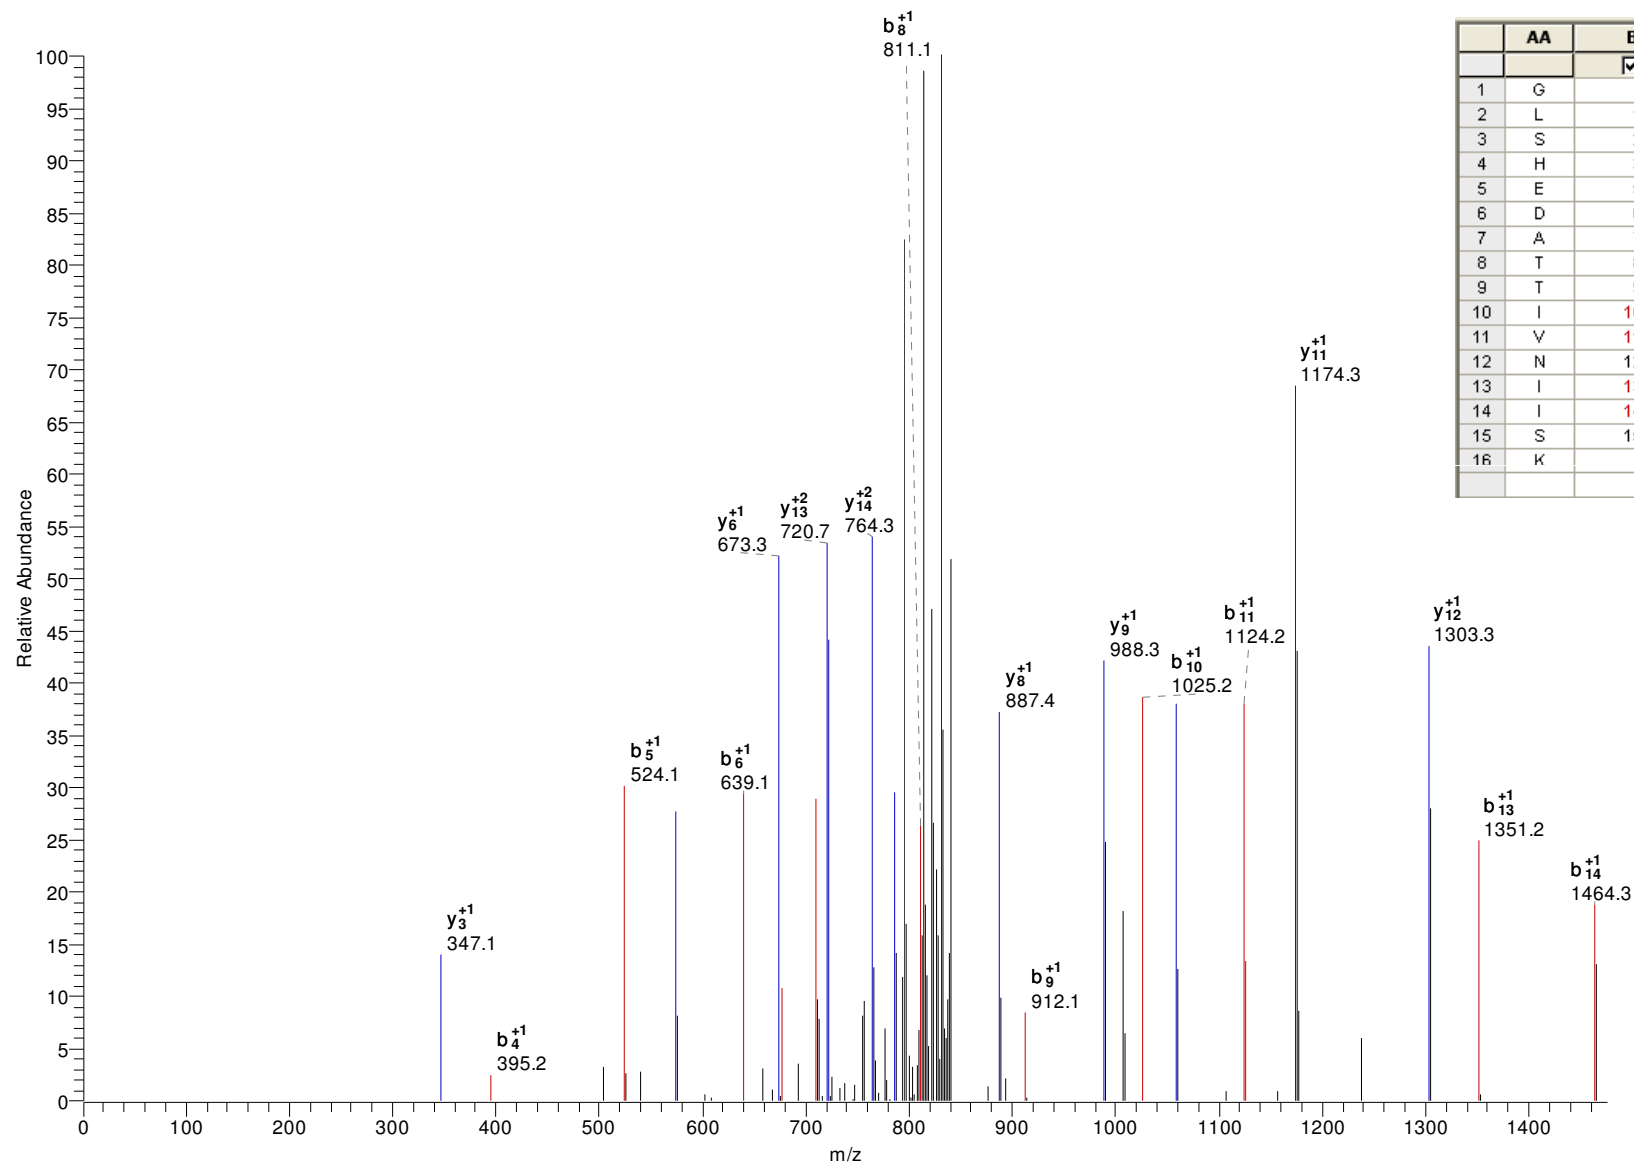

|    | AA | B       | Y       |    |
|----|----|---------|---------|----|
|    |    | ☑       | ☑       |    |
| 1  | G  | 58.03   | -       | 16 |
| 2  | L  | 171.11  | 1640.89 | 15 |
| 3  | S  | 258.14  | 1527.80 | 14 |
| 4  | H  | 395.20  | 1440.77 | 13 |
| 5  | E  | 524.25  | 1303.71 | 12 |
| 6  | D  | 639.27  | 1174.67 | 11 |
| 7  | A  | 710.31  | 1059.64 | 10 |
| 8  | T  | 811.36  | 988.60  | 9  |
| 9  | T  | 912.41  | 887.56  | 8  |
| 10 | I  | 1025.49 | 786.51  | 7  |
| 11 | V  | 1124.56 | 673.42  | 6  |
| 12 | N  | 1238.60 | 574.36  | 5  |
| 13 | I  | 1351.69 | 460.31  | 4  |
| 14 | I  | 1464.77 | 347.23  | 3  |
| 15 | S  | 1551.80 | 234.14  | 2  |
| 16 | K  | -       | 147.11  | 1  |

gi|70885123|gb|EAN97954.1| cytochrome b5-like, putative [Trypanosoma cruzi]

K.EFIVGDLDKSKPPVVEPK.A

P(pep)=0.000741212

M+H=2112.122314

Xcorr=4.42

DeltaM=0.66483

DCn=0.46

z=3

#3625-3625 NL: 7.69E1

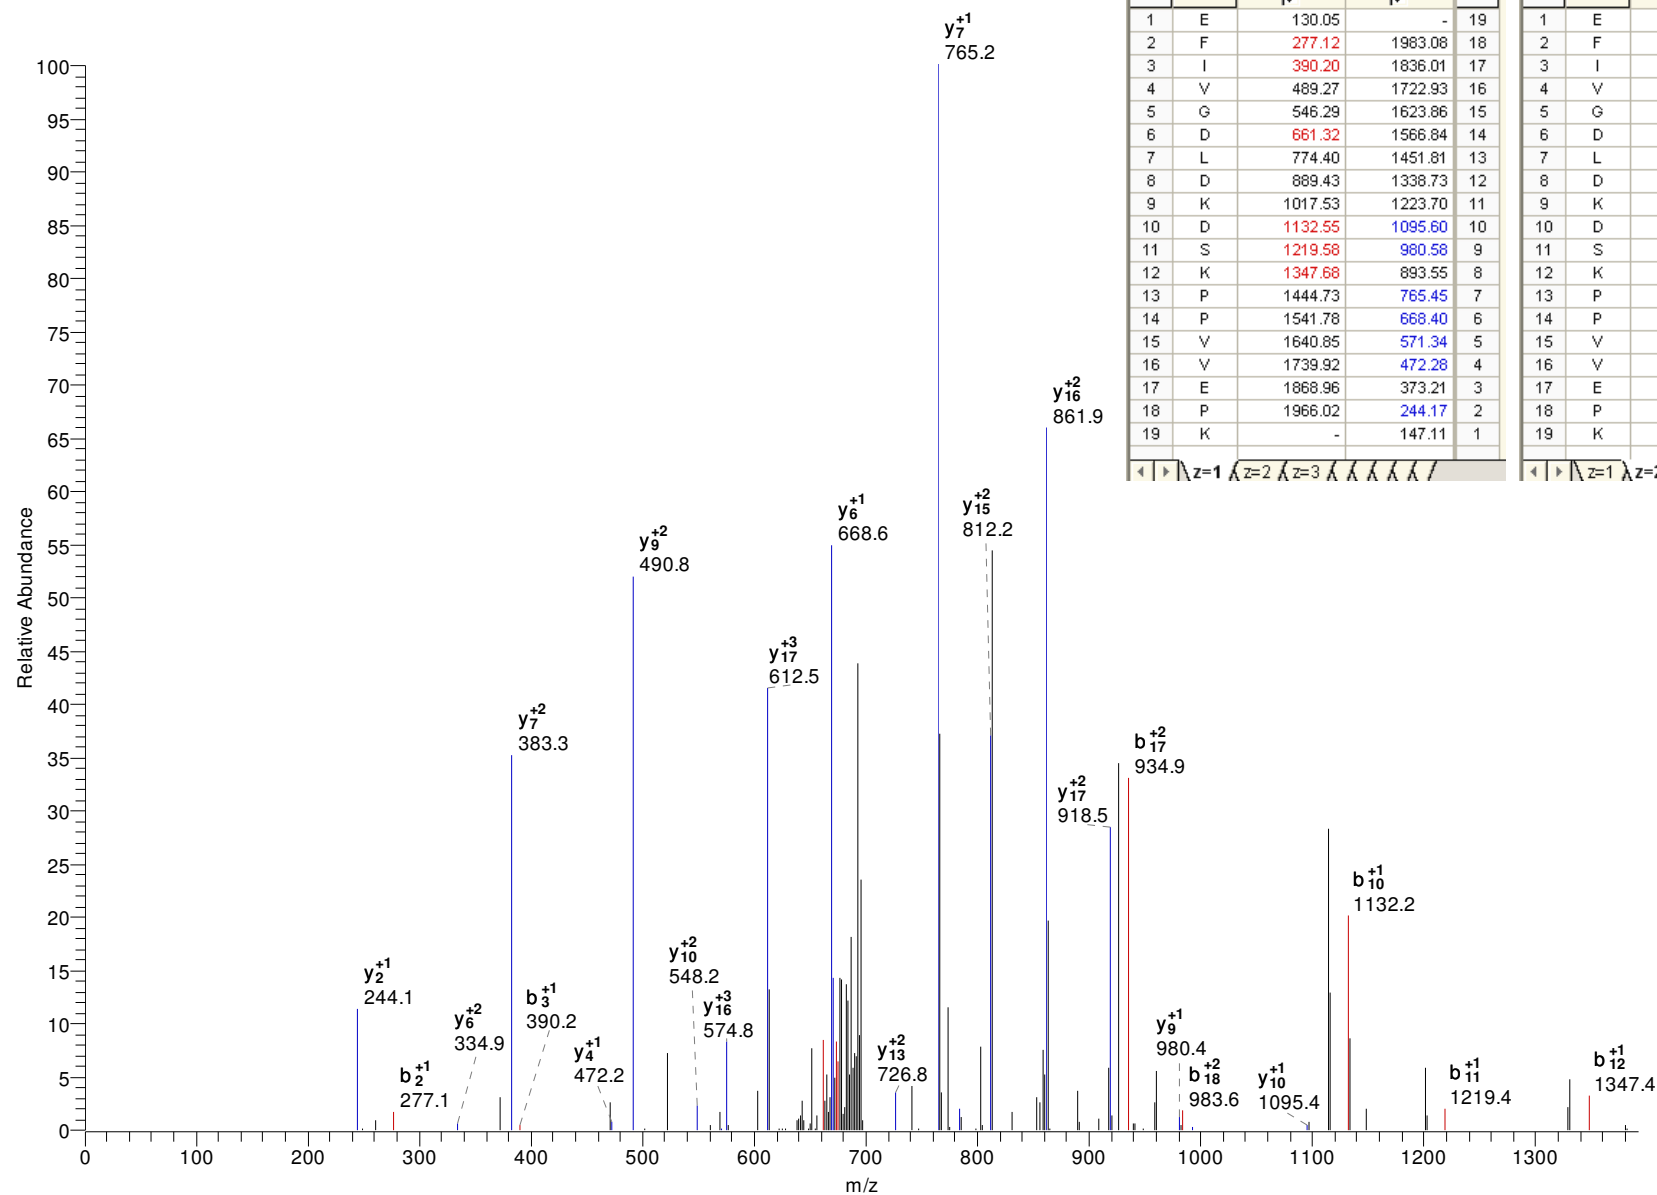

|    | AA | B       | Y       |    |
|----|----|---------|---------|----|
| 1  | E  | 130.05  | -       | 19 |
| 2  | F  | 277.12  | 1983.08 | 18 |
| 3  | I  | 390.20  | 1836.01 | 17 |
| 4  | V  | 489.27  | 1722.93 | 16 |
| 5  | G  | 546.29  | 1623.86 | 15 |
| 6  | D  | 661.32  | 1566.84 | 14 |
| 7  | L  | 774.40  | 1451.81 | 13 |
| 8  | D  | 869.43  | 1338.73 | 12 |
| 9  | K  | 1017.53 | 1223.70 | 11 |
| 10 | D  | 1132.55 | 1095.60 | 10 |
| 11 | S  | 1219.58 | 980.58  | 9  |
| 12 | K  | 1347.68 | 893.55  | 8  |
| 13 | P  | 1444.73 | 765.45  | 7  |
| 14 | P  | 1541.78 | 668.40  | 6  |
| 15 | V  | 1640.85 | 571.34  | 5  |
| 16 | V  | 1739.92 | 472.28  | 4  |
| 17 | E  | 1868.96 | 373.21  | 3  |
| 18 | P  | 1966.02 | 244.17  | 2  |
| 19 | K  | -       | 147.11  | 1  |

|    | AA | B      | Y      |    |
|----|----|--------|--------|----|
| 1  | E  | 65.53  | -      | 19 |
| 2  | F  | 139.06 | 992.04 | 18 |
| 3  | I  | 195.60 | 918.51 | 17 |
| 4  | V  | 245.14 | 861.97 | 16 |
| 5  | G  | 273.65 | 812.43 | 15 |
| 6  | D  | 331.16 | 783.92 | 14 |
| 7  | L  | 387.71 | 726.41 | 13 |
| 8  | D  | 445.22 | 669.87 | 12 |
| 9  | K  | 509.27 | 612.35 | 11 |
| 10 | D  | 566.78 | 548.31 | 10 |
| 11 | S  | 610.30 | 490.79 | 9  |
| 12 | K  | 674.34 | 447.28 | 8  |
| 13 | P  | 722.87 | 383.23 | 7  |
| 14 | P  | 771.40 | 334.70 | 6  |
| 15 | V  | 820.93 | 286.18 | 5  |
| 16 | V  | 870.46 | 236.64 | 4  |
| 17 | E  | 934.99 | 187.11 | 3  |
| 18 | P  | 983.51 | 122.59 | 2  |
| 19 | K  | -      | 74.06  | 1  |

gi|70869048|gb|EAN83733.1| cysteine peptidase, putative [Trypanosoma cruzi]

K.NSWTTQWGEDGYIR.I

M+H=1712.766357

DeltaM=0.91228

z=2

P(pep)=2.30E-06

Xcorr=4.26

DCn=0.55

#4429-4429 NL: 2.66E2

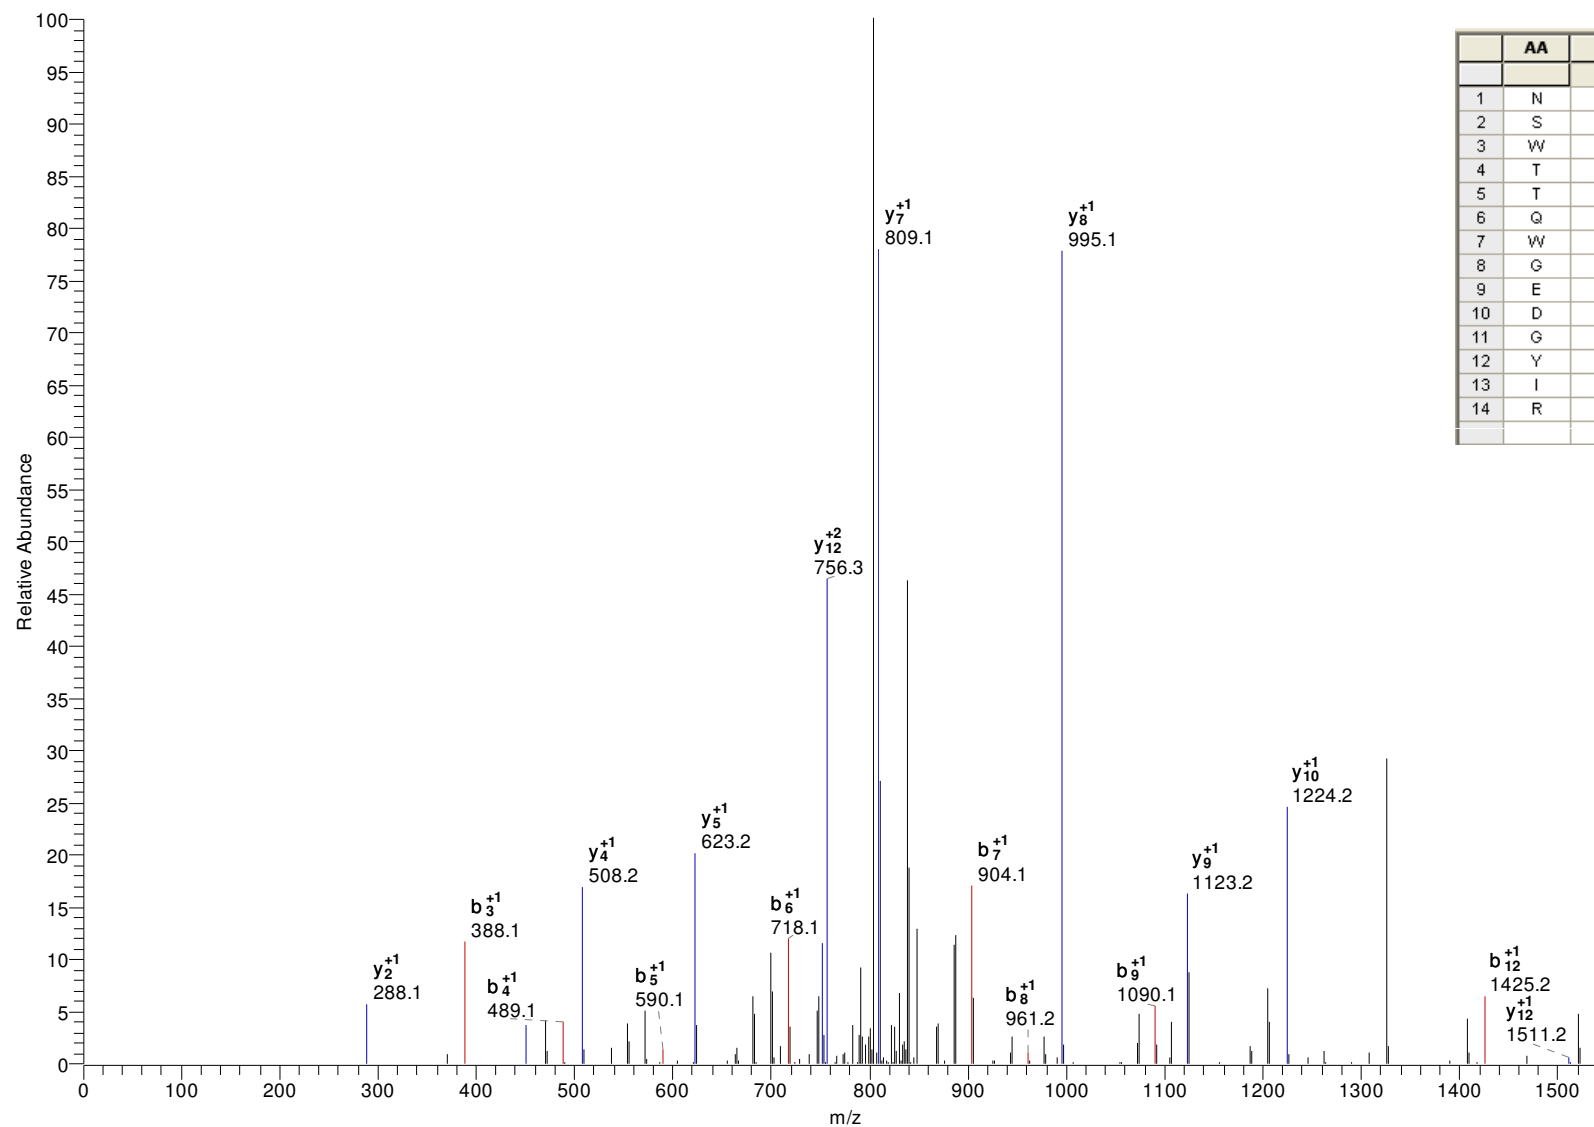

|    | AA | B       | Y       |    |
|----|----|---------|---------|----|
|    |    | ✓       | ✓       |    |
| 1  | N  | 115.05  | -       | 14 |
| 2  | S  | 202.08  | 1598.72 | 13 |
| 3  | W  | 388.16  | 1511.69 | 12 |
| 4  | T  | 489.21  | 1325.61 | 11 |
| 5  | T  | 590.26  | 1224.56 | 10 |
| 6  | Q  | 718.32  | 1123.52 | 9  |
| 7  | W  | 904.39  | 995.46  | 8  |
| 8  | G  | 961.42  | 809.38  | 7  |
| 9  | E  | 1090.46 | 752.36  | 6  |
| 10 | D  | 1205.49 | 623.31  | 5  |
| 11 | G  | 1262.51 | 508.29  | 4  |
| 12 | Y  | 1425.57 | 451.27  | 3  |
| 13 | I  | 1538.65 | 288.20  | 2  |
| 14 | R  | -       | 175.12  | 1  |

gi|3063548|gb|AAC14084.1| TcC31.28 [Trypanosoma cruzi]

R.VLVVINPGNPTGGVLDR.D

M+H=1719.97522

DeltaM=0.28874

z=2

P(pep)=3.22E-08

Xcorr=4.13

DCn=0.57

#4467-4467 NL:2.30E2

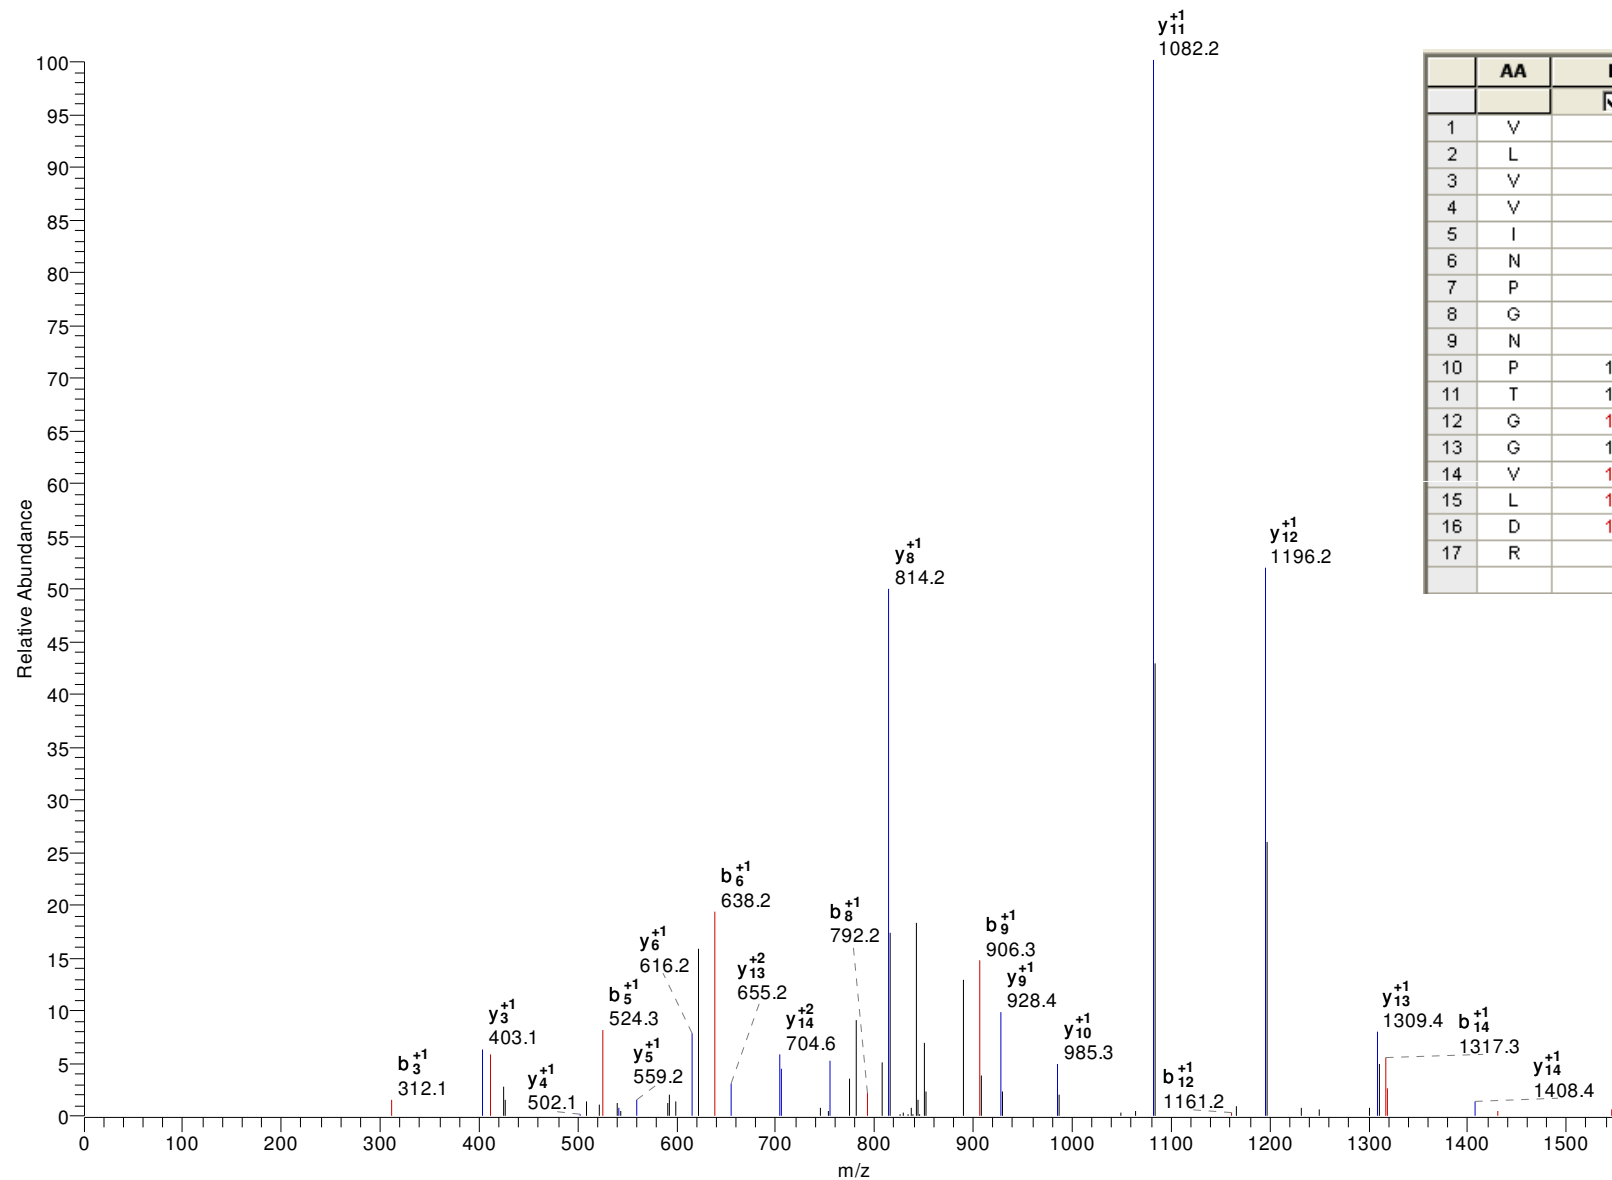

|    | AA | B                                   | Y                                   |    |
|----|----|-------------------------------------|-------------------------------------|----|
|    |    | <input checked="" type="checkbox"/> | <input checked="" type="checkbox"/> |    |
| 1  | V  | 100.08                              | -                                   | 17 |
| 2  | L  | 213.16                              | 1620.91                             | 16 |
| 3  | V  | 312.23                              | 1507.82                             | 15 |
| 4  | V  | 411.30                              | 1408.75                             | 14 |
| 5  | I  | 524.38                              | 1309.69                             | 13 |
| 6  | N  | 638.42                              | 1196.60                             | 12 |
| 7  | P  | 735.48                              | 1082.56                             | 11 |
| 8  | G  | 792.50                              | 985.51                              | 10 |
| 9  | N  | 906.54                              | 928.48                              | 9  |
| 10 | P  | 1003.59                             | 814.44                              | 8  |
| 11 | T  | 1104.64                             | 717.39                              | 7  |
| 12 | G  | 1161.66                             | 616.34                              | 6  |
| 13 | G  | 1218.68                             | 559.32                              | 5  |
| 14 | V  | 1317.75                             | 502.30                              | 4  |
| 15 | L  | 1430.84                             | 403.23                              | 3  |
| 16 | D  | 1545.86                             | 290.15                              | 2  |
| 17 | R  | -                                   | 175.12                              | 1  |

gi|70875763|gb|EAN89283.1| urocanate hydratase, putative [Trypanosoma cruzi]

R.FWDYGNLFLLEASR.A

M+H=1704.801636

DeltaM=1.74211

z=2

P(pep)=7.19E-08

Xcorr=4.12

DCn=0.52

#5461-5461 NL: 3.56E1

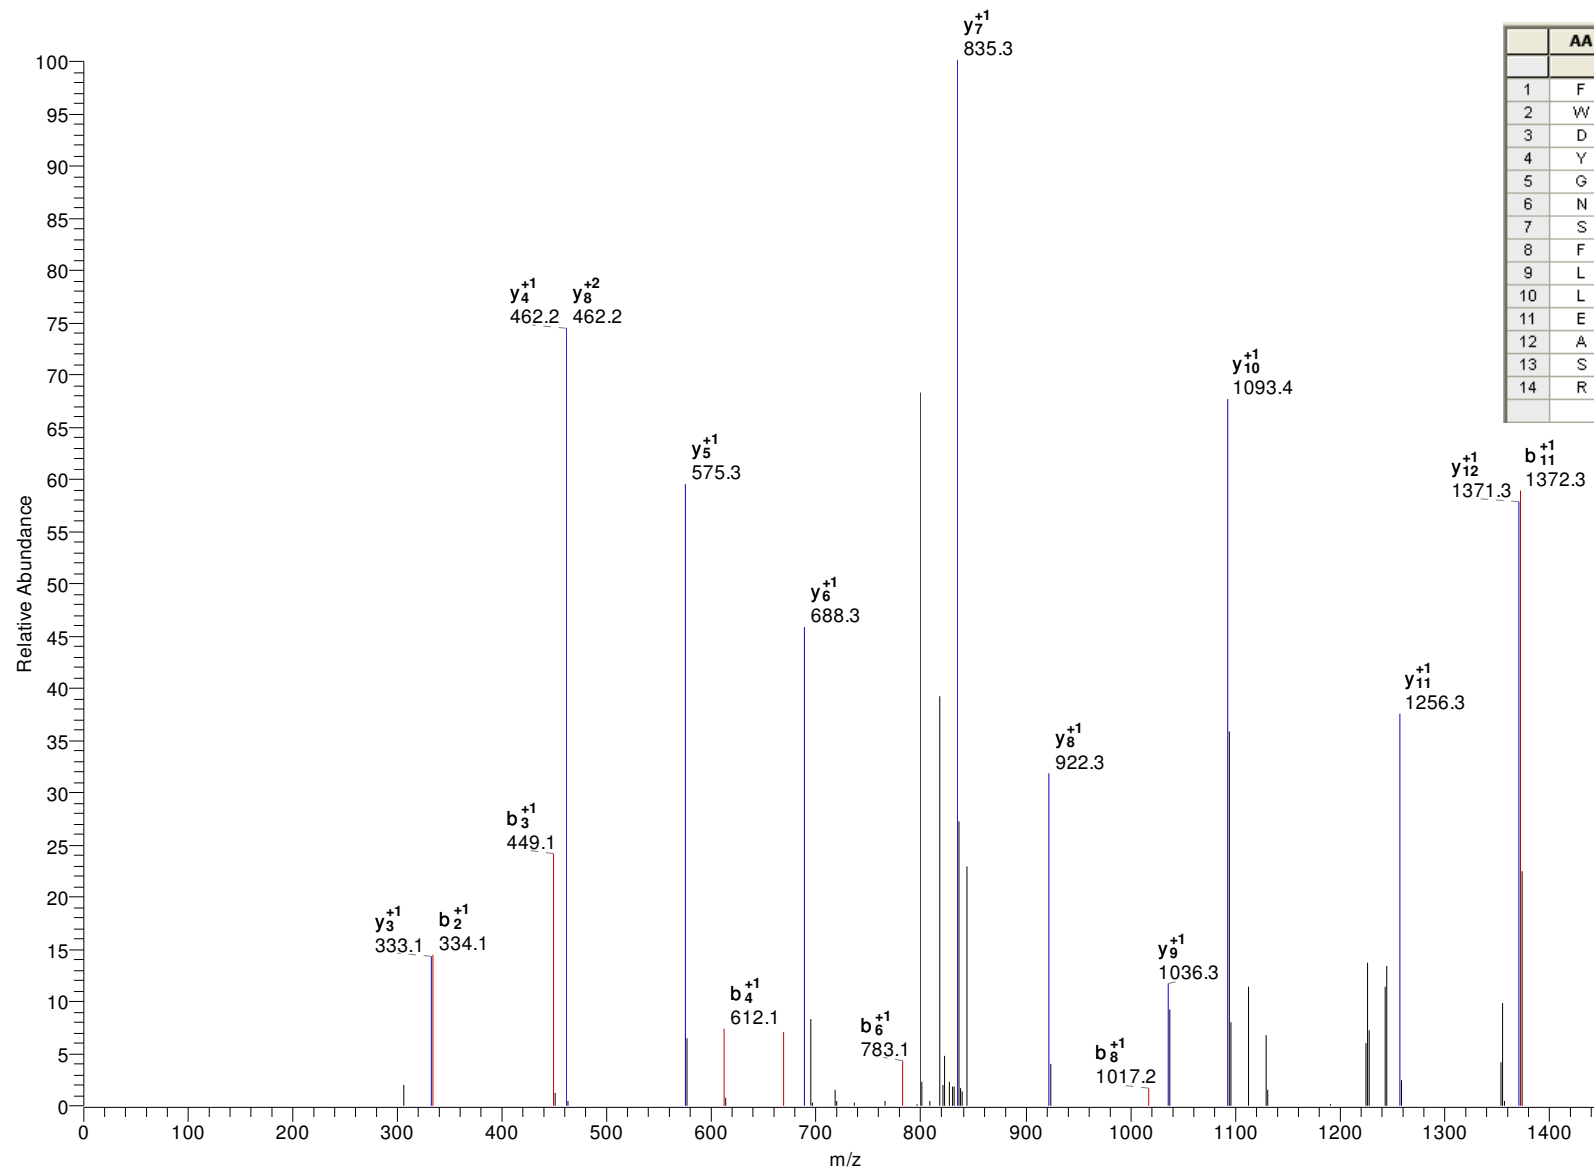

|    | AA | B       | Y       |    |
|----|----|---------|---------|----|
|    |    | ☑       | ☑       |    |
| 1  | F  | 148.08  | -       | 14 |
| 2  | W  | 334.16  | 1557.73 | 13 |
| 3  | D  | 449.18  | 1371.65 | 12 |
| 4  | Y  | 612.25  | 1256.63 | 11 |
| 5  | G  | 669.27  | 1093.56 | 10 |
| 6  | N  | 783.31  | 1036.54 | 9  |
| 7  | S  | 870.34  | 922.50  | 8  |
| 8  | F  | 1017.41 | 835.47  | 7  |
| 9  | L  | 1130.49 | 688.40  | 6  |
| 10 | L  | 1243.58 | 575.31  | 5  |
| 11 | E  | 1372.62 | 462.23  | 4  |
| 12 | A  | 1443.66 | 333.19  | 3  |
| 13 | S  | 1530.69 | 262.15  | 2  |
| 14 | R  | -       | 175.12  | 1  |

gi|61744171|gb|AAX55669.1| dehydrogenase [Trypanosoma cruzi]

R.YDFEADQQIR.E

P(pep)=5.38E-06

M+H=1413.628052

Xcorr=4.07

DeltaM=1.45354

DCn=0.44

z=2

#3226-3226 NL: 1.13E2

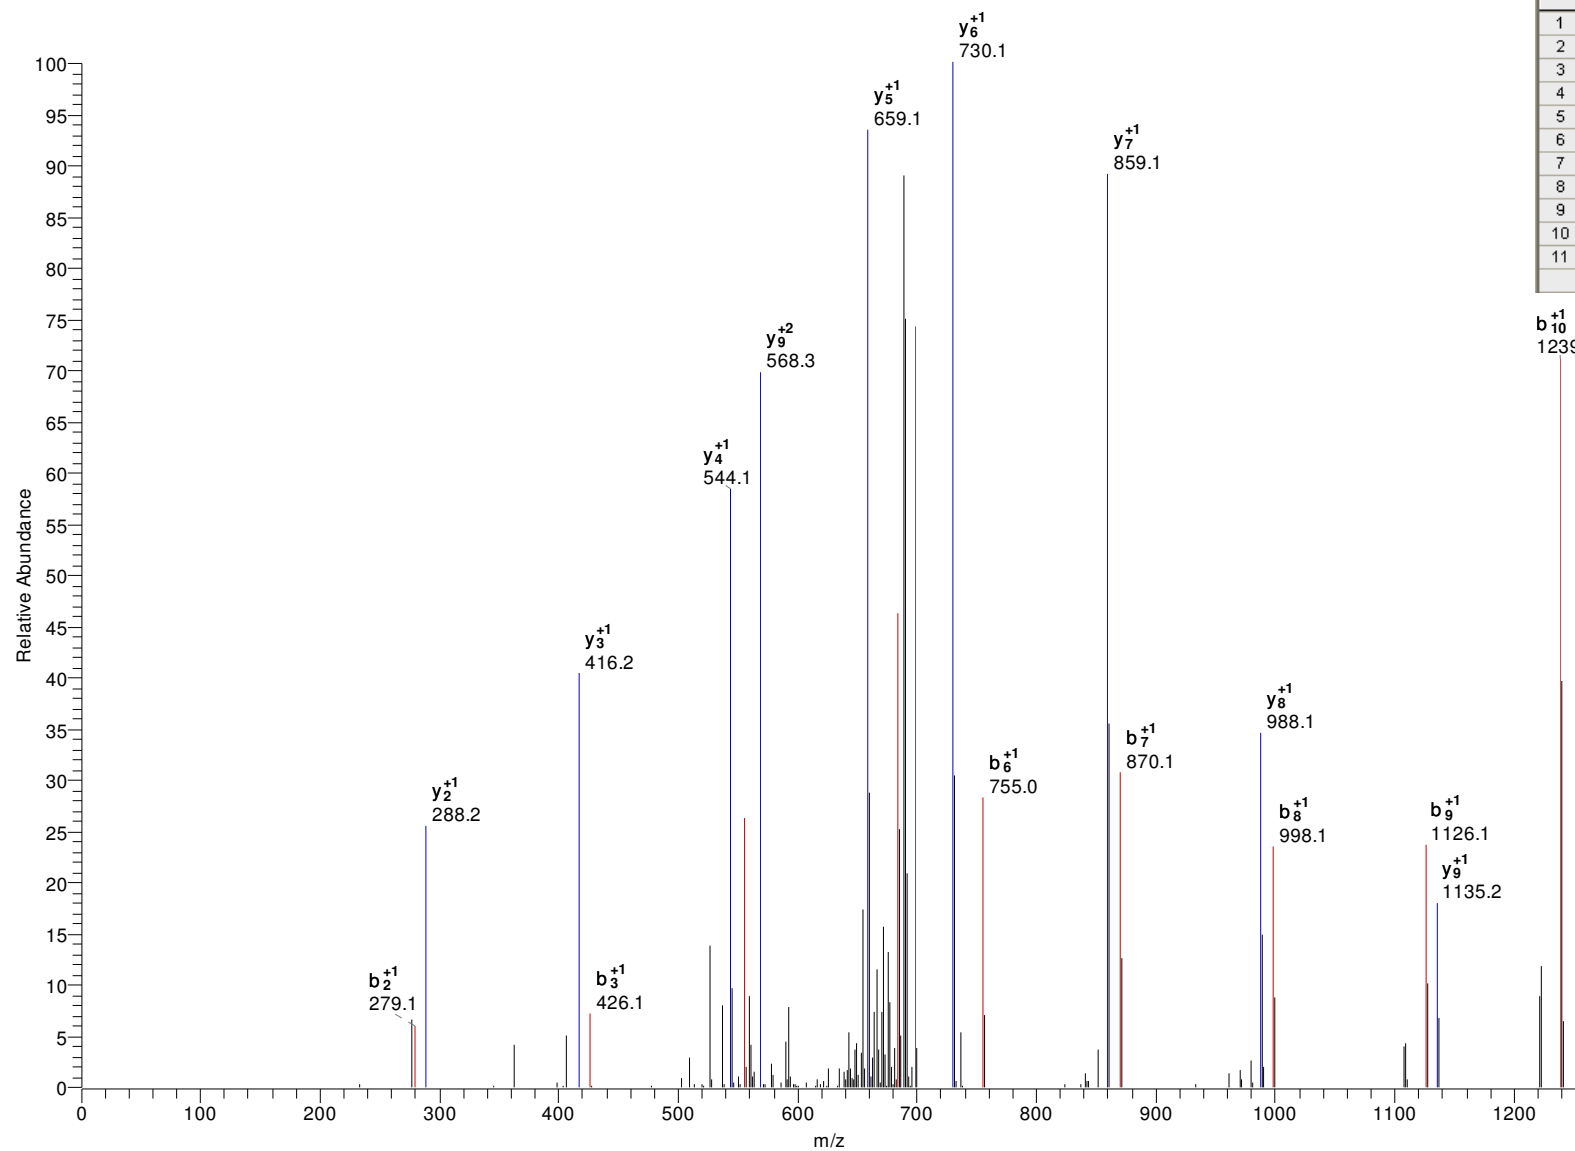

|    | AA | B                                   | Y                                   |    |
|----|----|-------------------------------------|-------------------------------------|----|
|    |    | <input checked="" type="checkbox"/> | <input checked="" type="checkbox"/> |    |
| 1  | Y  | 164.07                              | -                                   | 11 |
| 2  | D  | 279.10                              | 1250.56                             | 10 |
| 3  | F  | 426.17                              | 1135.54                             | 9  |
| 4  | E  | 555.21                              | 988.47                              | 8  |
| 5  | E  | 684.25                              | 859.43                              | 7  |
| 6  | A  | 755.29                              | 730.38                              | 6  |
| 7  | D  | 870.32                              | 659.35                              | 5  |
| 8  | Q  | 998.37                              | 544.32                              | 4  |
| 9  | Q  | 1126.43                             | 416.26                              | 3  |
| 10 | I  | 1239.52                             | 288.20                              | 2  |
| 11 | R  | -                                   | 175.12                              | 1  |

gi|70881191|gb|EAN94237.1| hypothetical protein, conserved [Trypanosoma cruzi]

K.EDGSSQWVFESAPDADTR.V

M+H=1996.851929

DeltaM=0.39861

z=2

P(pep)=3.70E-06

Xcorr=4.06

DCn=0.59

#3963-3963 NL: 2.56E2

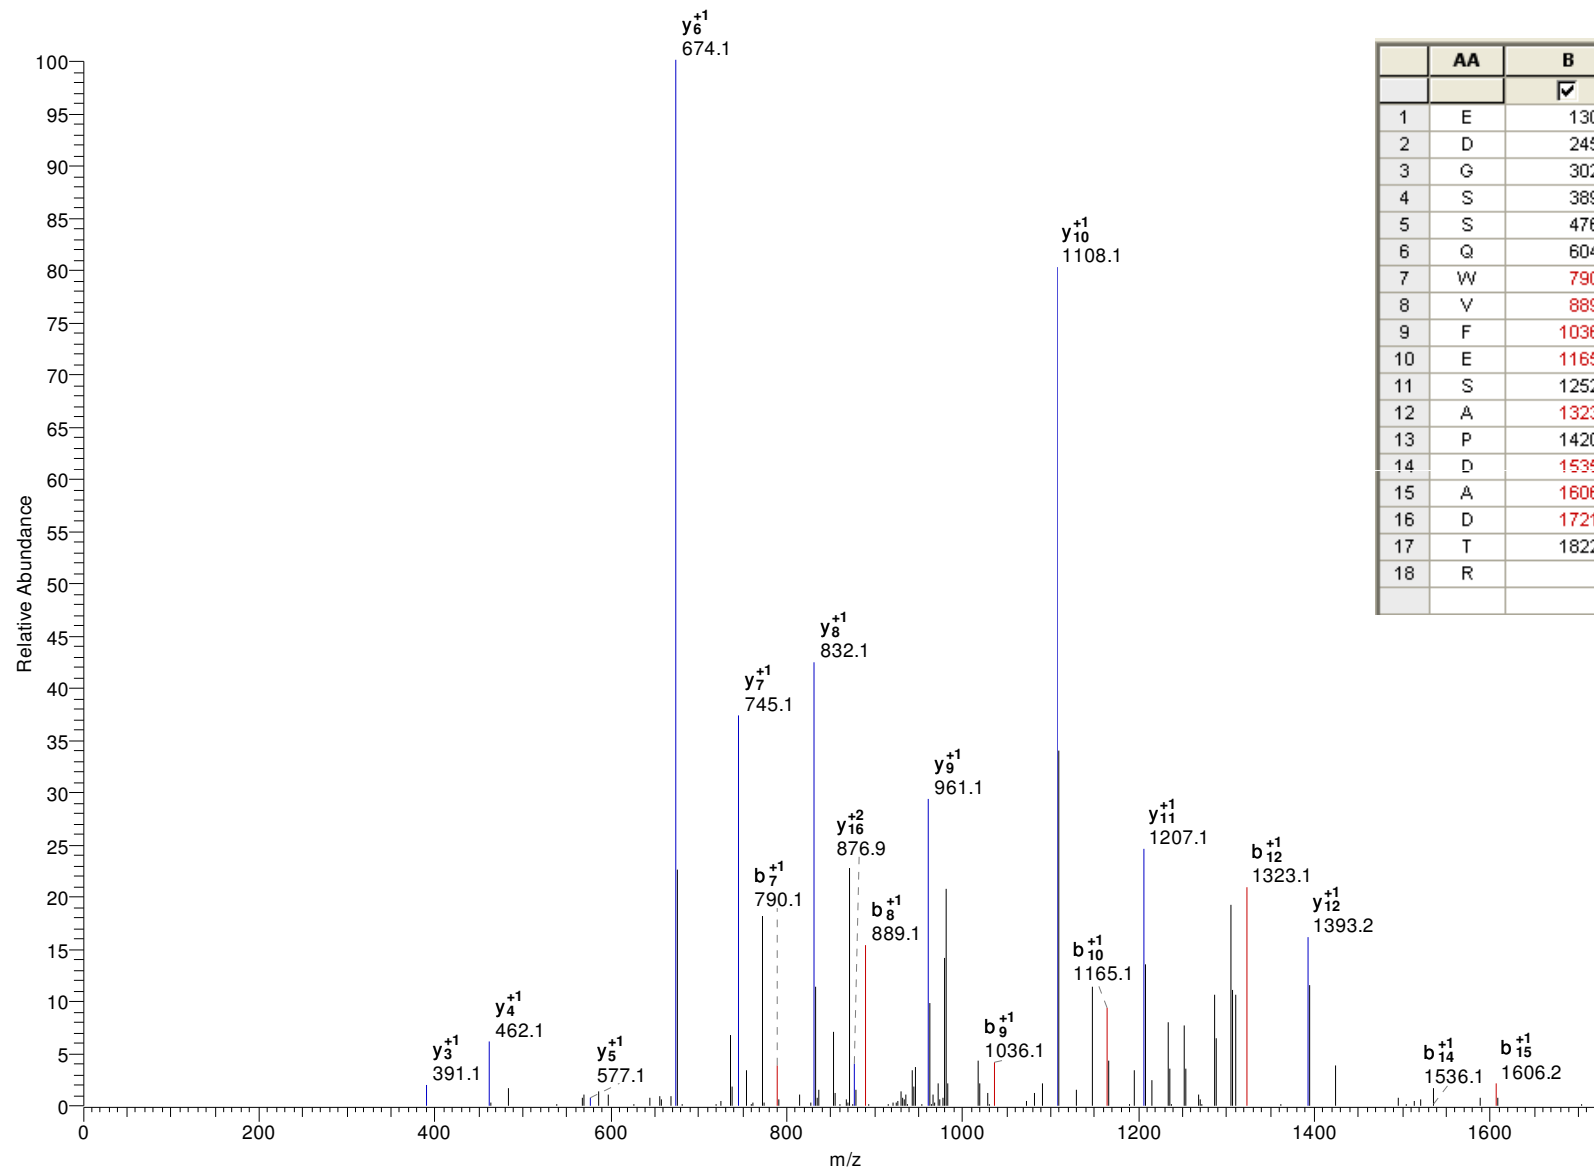

|    | AA | B       | Y       |    |
|----|----|---------|---------|----|
|    |    | ✓       | ✓       |    |
| 1  | E  | 130.05  | -       | 18 |
| 2  | D  | 245.08  | 1867.81 | 17 |
| 3  | G  | 302.10  | 1752.78 | 16 |
| 4  | S  | 389.13  | 1695.76 | 15 |
| 5  | S  | 476.16  | 1608.73 | 14 |
| 6  | Q  | 604.22  | 1521.70 | 13 |
| 7  | W  | 790.30  | 1393.64 | 12 |
| 8  | V  | 889.37  | 1207.56 | 11 |
| 9  | F  | 1036.44 | 1108.49 | 10 |
| 10 | E  | 1165.48 | 961.42  | 9  |
| 11 | S  | 1252.51 | 832.38  | 8  |
| 12 | A  | 1323.55 | 745.35  | 7  |
| 13 | P  | 1420.60 | 674.31  | 6  |
| 14 | D  | 1535.63 | 577.26  | 5  |
| 15 | A  | 1606.67 | 462.23  | 4  |
| 16 | D  | 1721.69 | 391.19  | 3  |
| 17 | T  | 1822.74 | 276.17  | 2  |
| 18 | R  | -       | 175.12  | 1  |



gi|70880087|gb|EAN93210.1| vesicle-associated membrane protein, putative [Trypanosoma cruzi]

K.SNTLADQAEQFK.Q

M+H=1351.648804

DeltaM=0.95793

z=2

P(pep)=1.82E-07

Xcorr=4.03

DCn=0.52

#2709-2709 NL: 2.10E2

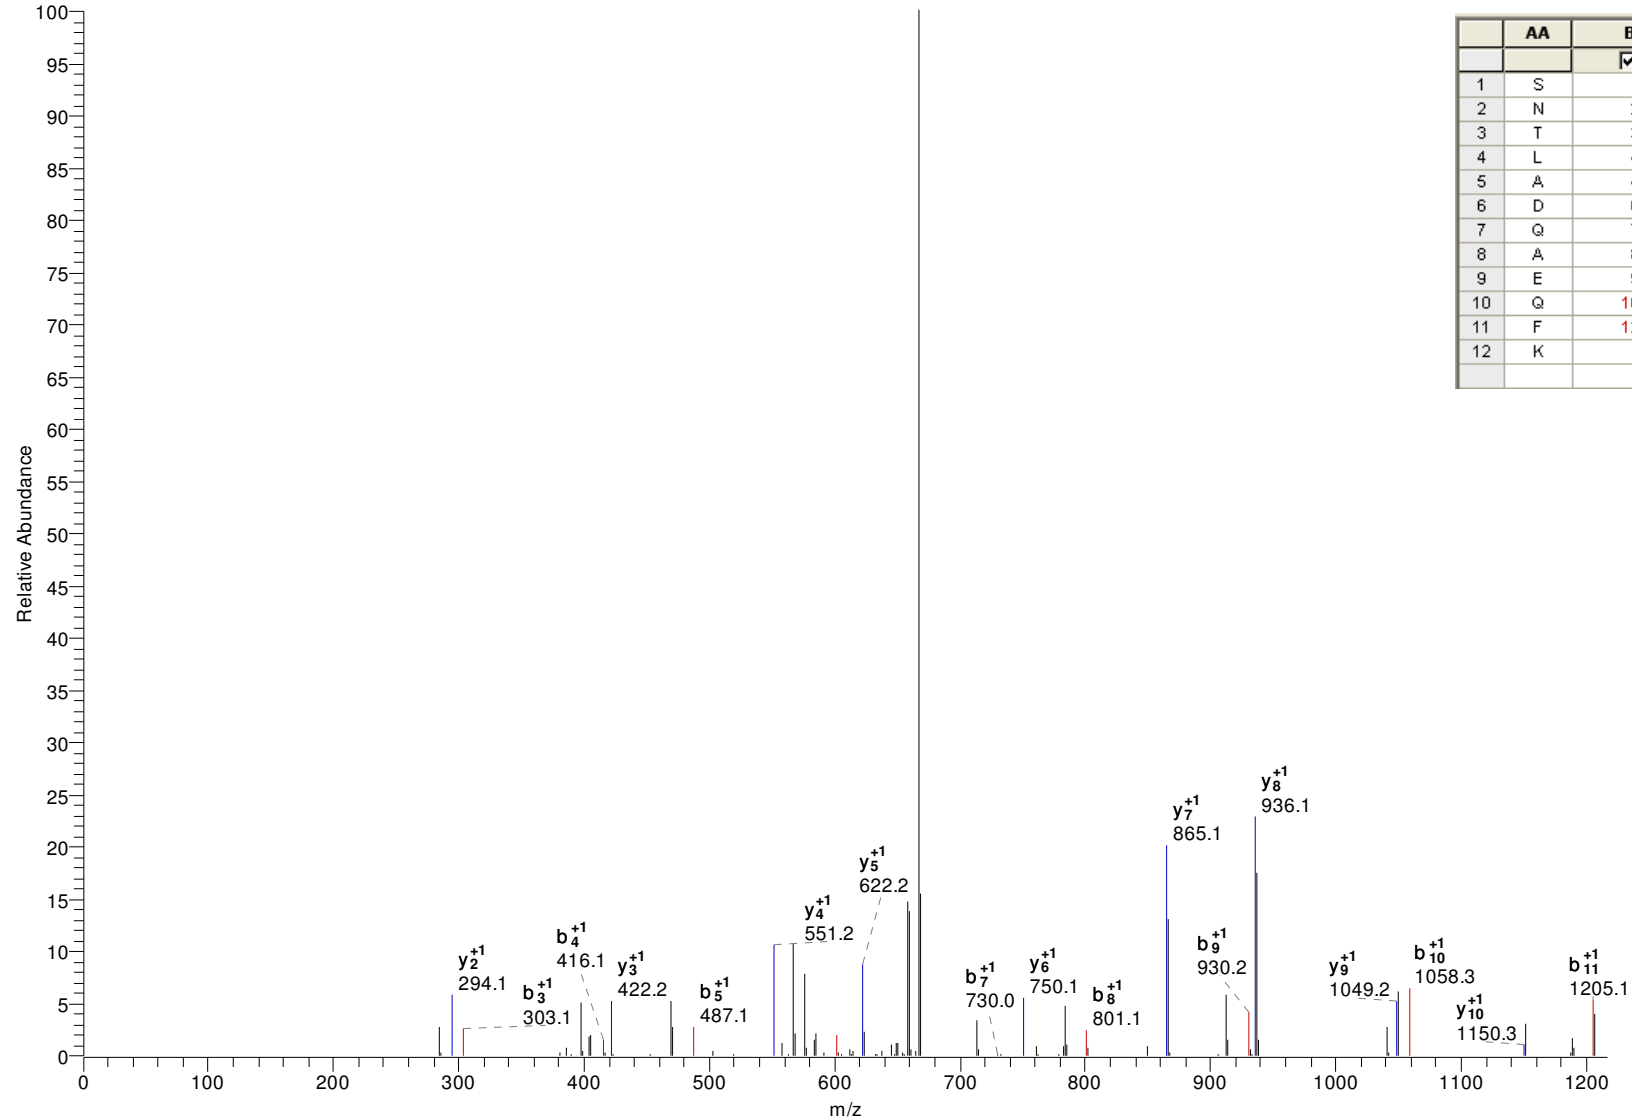

|    | AA | B       | Y       |    |
|----|----|---------|---------|----|
| 1  | S  | 88.04   | -       | 12 |
| 2  | N  | 202.08  | 1264.62 | 11 |
| 3  | T  | 303.13  | 1150.57 | 10 |
| 4  | L  | 416.21  | 1049.53 | 9  |
| 5  | A  | 487.25  | 936.44  | 8  |
| 6  | D  | 602.28  | 865.41  | 7  |
| 7  | Q  | 730.34  | 750.38  | 6  |
| 8  | A  | 801.37  | 622.32  | 5  |
| 9  | E  | 930.42  | 551.28  | 4  |
| 10 | Q  | 1058.47 | 422.24  | 3  |
| 11 | F  | 1205.54 | 294.18  | 2  |
| 12 | K  | -       | 147.11  | 1  |

gi|70872606|gb|EAN86554.1| fatty acyl CoA synthetase, putative [Trypanosoma cruzi]

R.SLVDFSEYQEYMR.L

M+H=1666.741699

DeltaM=1.84685

z=2

P(pep)=1.32E-08

Xcorr=4.02

DCn=0.59

#4678-4678 NL: 9.08E1

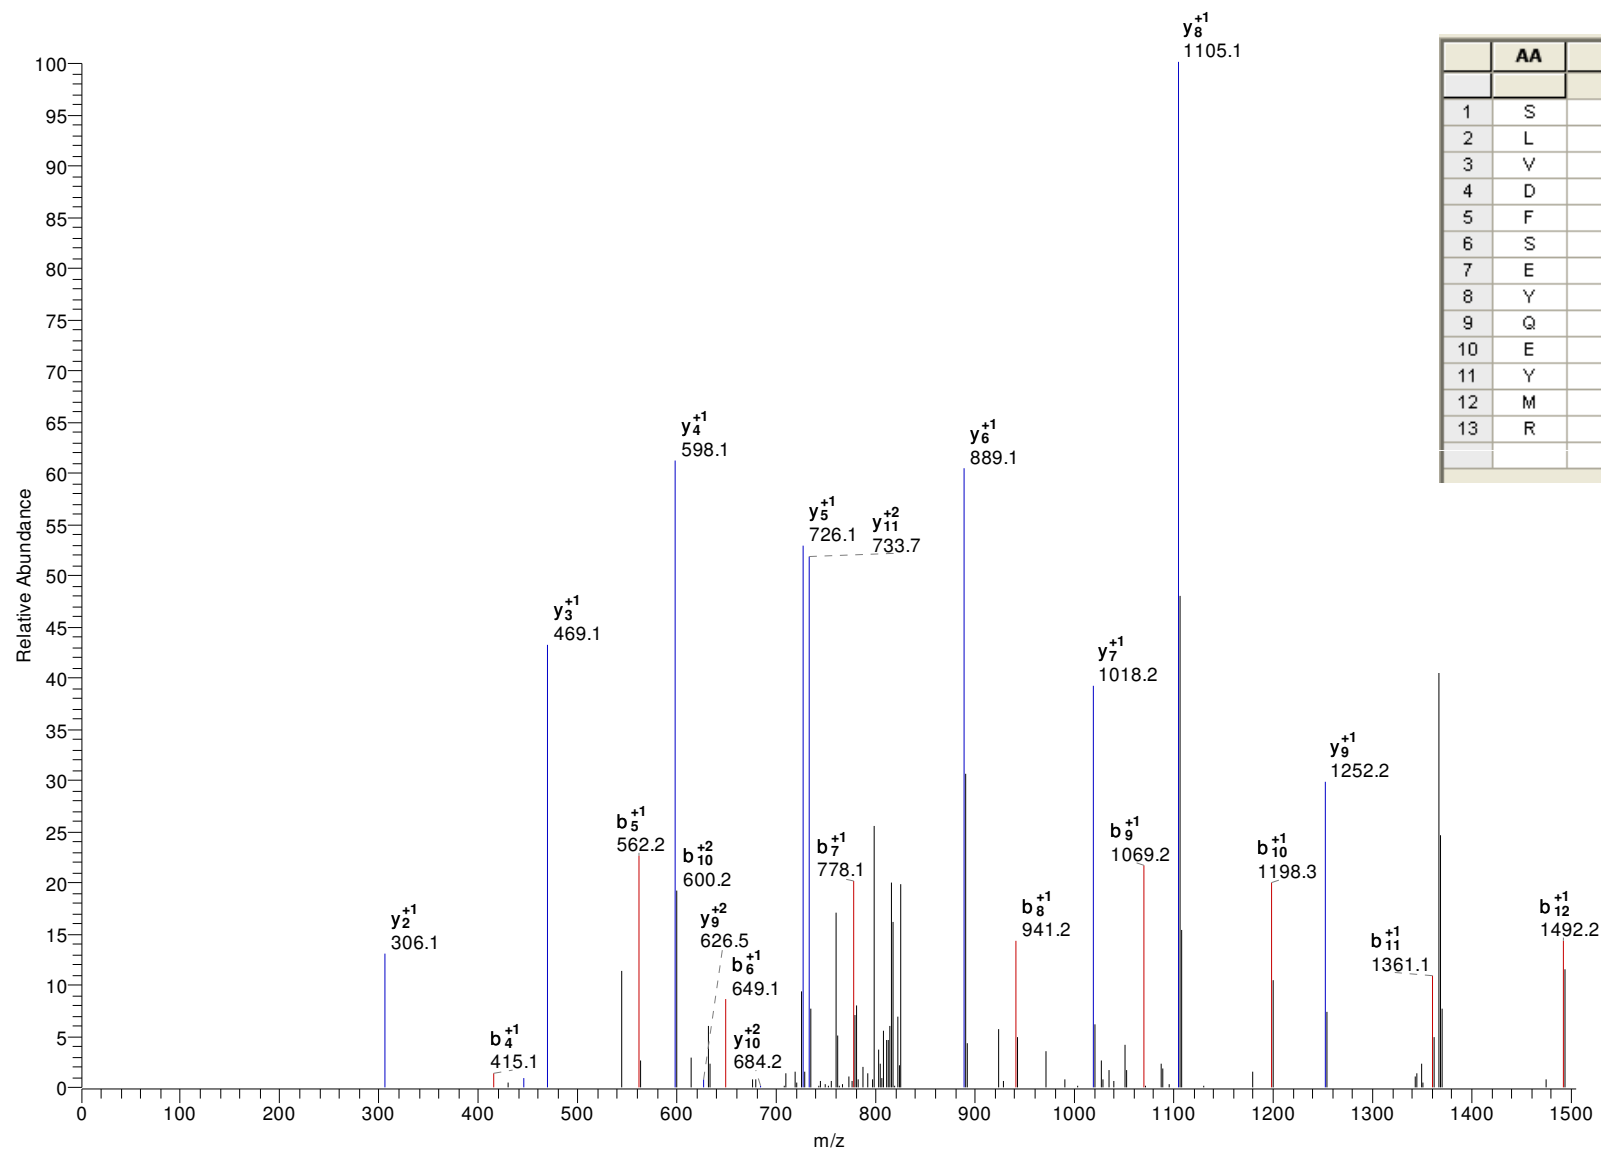

|    | AA | B                                   | Y                                   |    |
|----|----|-------------------------------------|-------------------------------------|----|
|    |    | <input checked="" type="checkbox"/> | <input checked="" type="checkbox"/> |    |
| 1  | S  | 88.04                               | -                                   | 13 |
| 2  | L  | 201.12                              | 1579.71                             | 12 |
| 3  | V  | 300.19                              | 1466.63                             | 11 |
| 4  | D  | 415.22                              | 1367.56                             | 10 |
| 5  | F  | 562.29                              | 1252.53                             | 9  |
| 6  | S  | 649.32                              | 1105.46                             | 8  |
| 7  | E  | 778.36                              | 1018.43                             | 7  |
| 8  | Y  | 941.43                              | 889.39                              | 6  |
| 9  | Q  | 1069.48                             | 726.32                              | 5  |
| 10 | E  | 1198.53                             | 598.27                              | 4  |
| 11 | Y  | 1361.59                             | 469.22                              | 3  |
| 12 | M  | 1492.63                             | 306.16                              | 2  |
| 13 | R  | -                                   | 175.12                              | 1  |

gi|70871218|gb|EAN85406.1| hypothetical protein, conserved [Trypanosoma cruzi]

R.EAVLQDPLGLPIIGR.V

M+H=1590.921387

DeltaM=1.95195

z=2

P(pep)=7.92E-08

Xcorr=3.97

DCn=0.56

#5577-5577 NL: 2.59E2

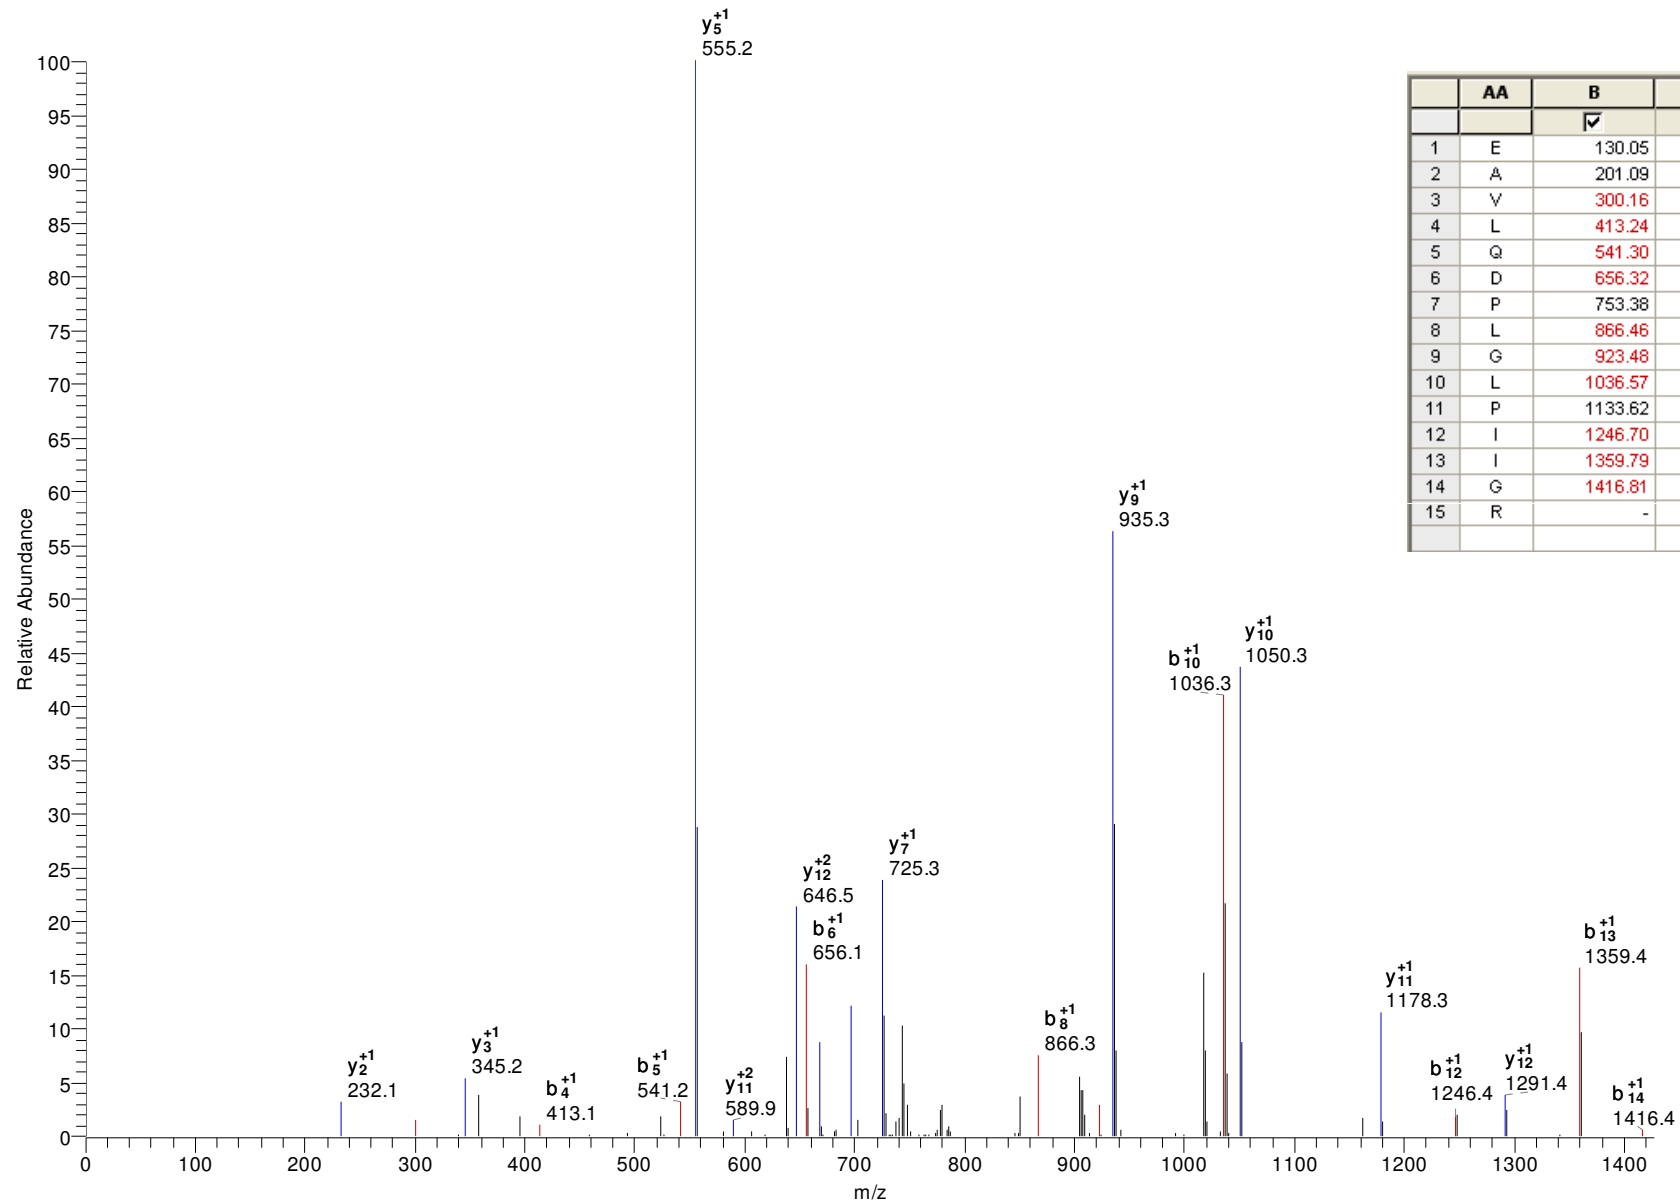

|    | AA | B                                   | Y                                   |    |
|----|----|-------------------------------------|-------------------------------------|----|
|    |    | <input checked="" type="checkbox"/> | <input checked="" type="checkbox"/> |    |
| 1  | E  | 130.05                              | -                                   | 15 |
| 2  | A  | 201.09                              | 1461.88                             | 14 |
| 3  | V  | 300.16                              | 1390.84                             | 13 |
| 4  | L  | 413.24                              | 1291.77                             | 12 |
| 5  | Q  | 541.30                              | 1178.69                             | 11 |
| 6  | D  | 656.32                              | 1050.63                             | 10 |
| 7  | P  | 753.38                              | 935.60                              | 9  |
| 8  | L  | 866.46                              | 838.55                              | 8  |
| 9  | G  | 923.48                              | 725.47                              | 7  |
| 10 | L  | 1036.57                             | 668.45                              | 6  |
| 11 | P  | 1133.62                             | 555.36                              | 5  |
| 12 | I  | 1246.70                             | 458.31                              | 4  |
| 13 | I  | 1359.79                             | 345.22                              | 3  |
| 14 | G  | 1416.81                             | 232.14                              | 2  |
| 15 | R  | -                                   | 175.12                              | 1  |

gi|70877155|gb|EAN90529.1| hypothetical protein, conserved [Trypanosoma cruzi]

K.VDVSESLCGQYK.L

M+H=1384.641357

DeltaM=1.78362

z=2

P(pep)=1.98E-06

Xcorr=3.95

DCn=0.27

#2921-2921 NL:8.91E1

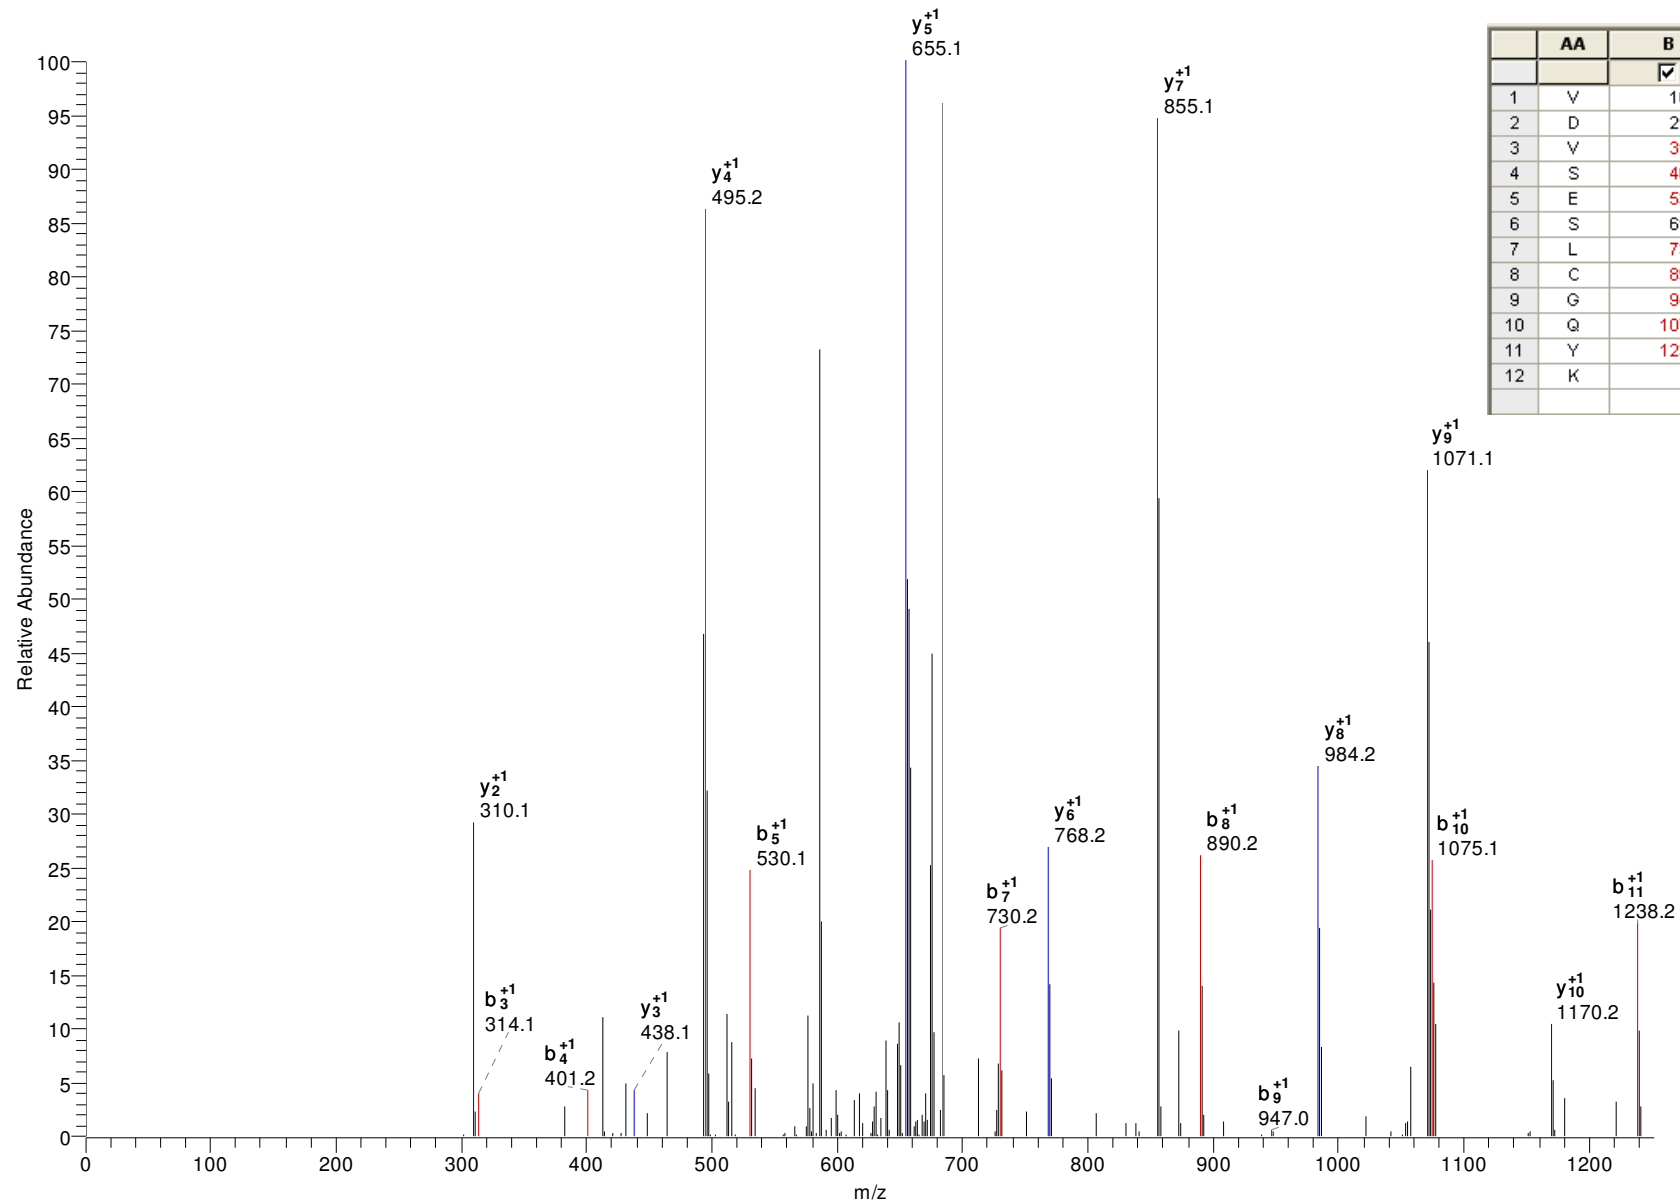

|    | AA | B       | Y       |    |
|----|----|---------|---------|----|
| 1  | V  | 100.08  | -       | 12 |
| 2  | D  | 215.10  | 1285.57 | 11 |
| 3  | V  | 314.17  | 1170.55 | 10 |
| 4  | S  | 401.20  | 1071.48 | 9  |
| 5  | E  | 530.25  | 984.45  | 8  |
| 6  | S  | 617.28  | 855.40  | 7  |
| 7  | L  | 730.36  | 768.37  | 6  |
| 8  | C  | 890.39  | 655.29  | 5  |
| 9  | G  | 947.41  | 495.26  | 4  |
| 10 | Q  | 1075.47 | 438.23  | 3  |
| 11 | Y  | 1238.54 | 310.18  | 2  |
| 12 | K  | -       | 147.11  | 1  |

gi|34329198|gb|AAQ63816.1| 6-phosphogluconate dehydrogenase [Trypanosoma cruzi]

K.LSNLLCAFEK.E

M+H=1194.618774

DeltaM=1.94597

z=2

P(pep)=1.93E-05

Xcorr=3.95E

DCn=0.35

#4789-4789 NL: 4.05E2

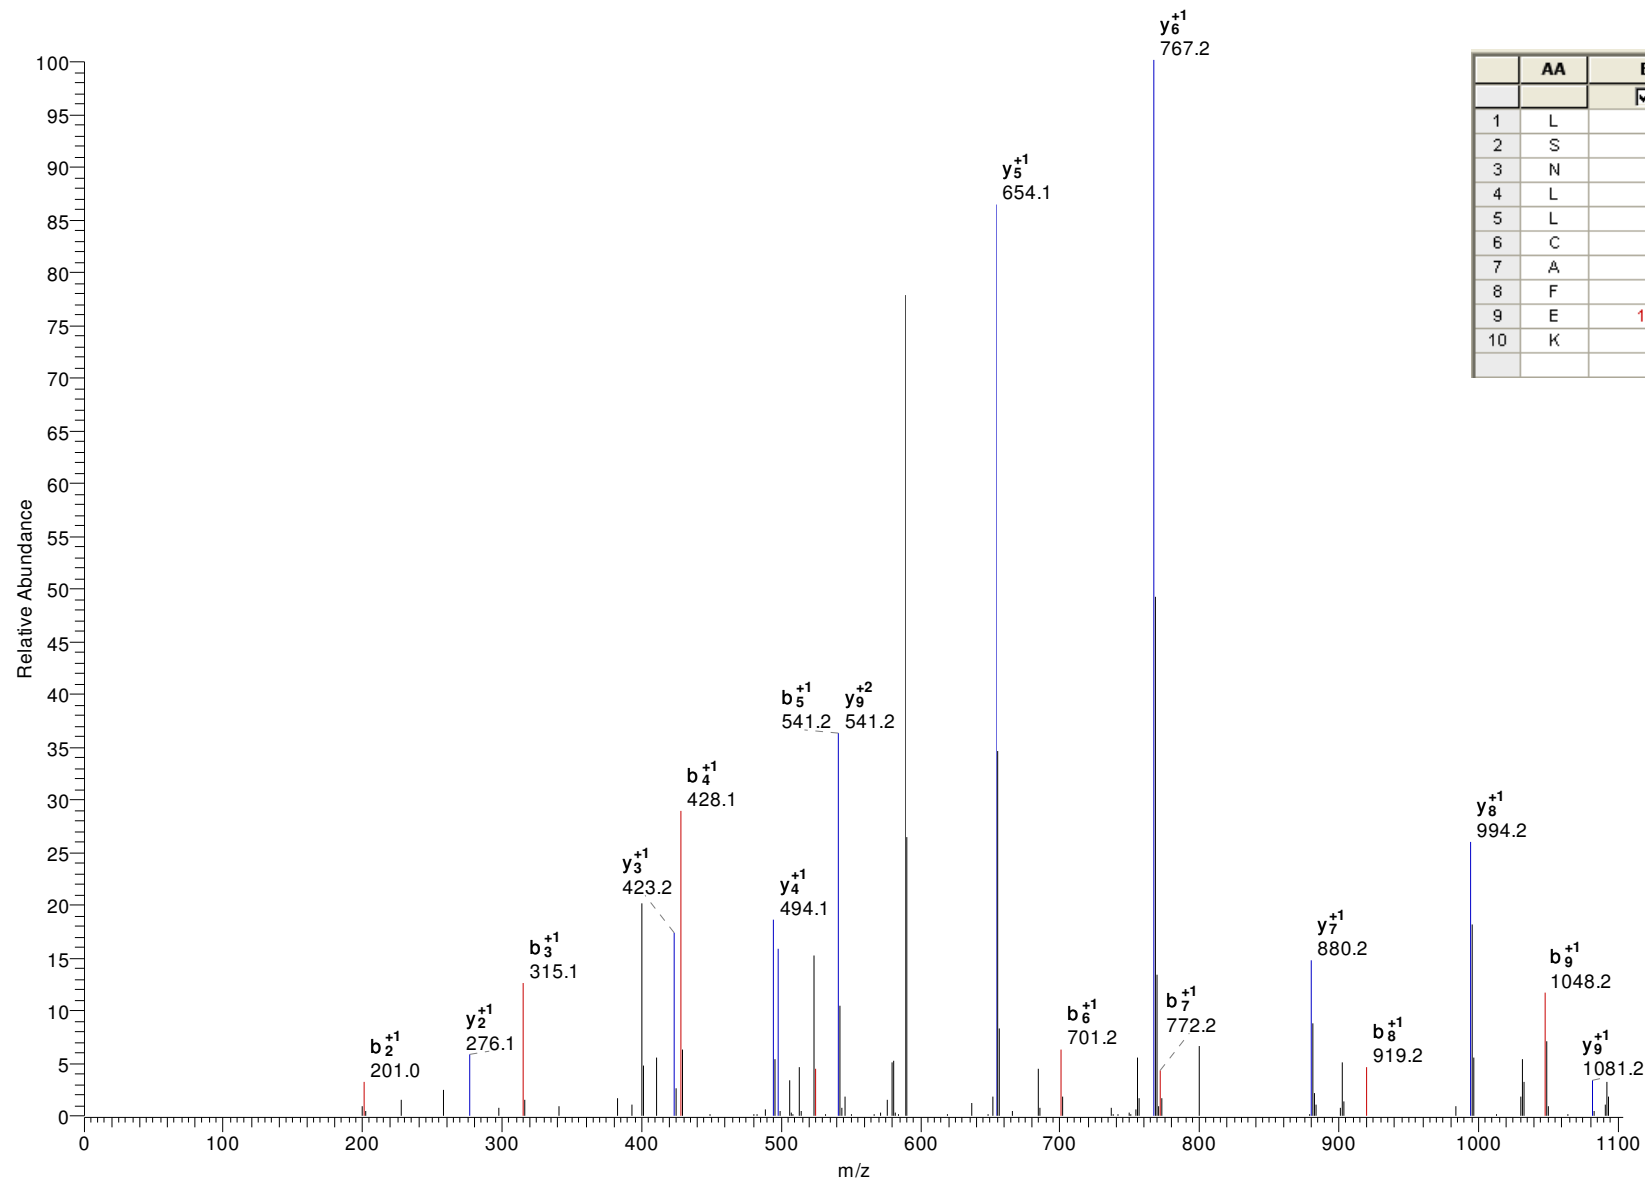

|    | AA | B                                   | Y                                   |    |
|----|----|-------------------------------------|-------------------------------------|----|
|    |    | <input checked="" type="checkbox"/> | <input checked="" type="checkbox"/> |    |
| 1  | L  | 114.09                              | -                                   | 10 |
| 2  | S  | 201.12                              | 1081.53                             | 9  |
| 3  | N  | 315.17                              | 994.50                              | 8  |
| 4  | L  | 428.25                              | 880.46                              | 7  |
| 5  | L  | 541.33                              | 767.38                              | 6  |
| 6  | C  | 701.37                              | 654.29                              | 5  |
| 7  | A  | 772.40                              | 494.26                              | 4  |
| 8  | F  | 919.47                              | 423.22                              | 3  |
| 9  | E  | 1048.51                             | 276.16                              | 2  |
| 10 | K  | -                                   | 147.11                              | 1  |

gi|70869764|gb|EAN84265.1| cell differentiation protein, putative [Trypanosoma cruzi]

K.LLLSDLGLQYVCQTPER.F

M+H2005.042358

DeltaM=1.11101

z=2

P(pep)=1.64E-08

Xcorr=3.94

DCn=0.60

#5519-5519 NL: 4.12E1

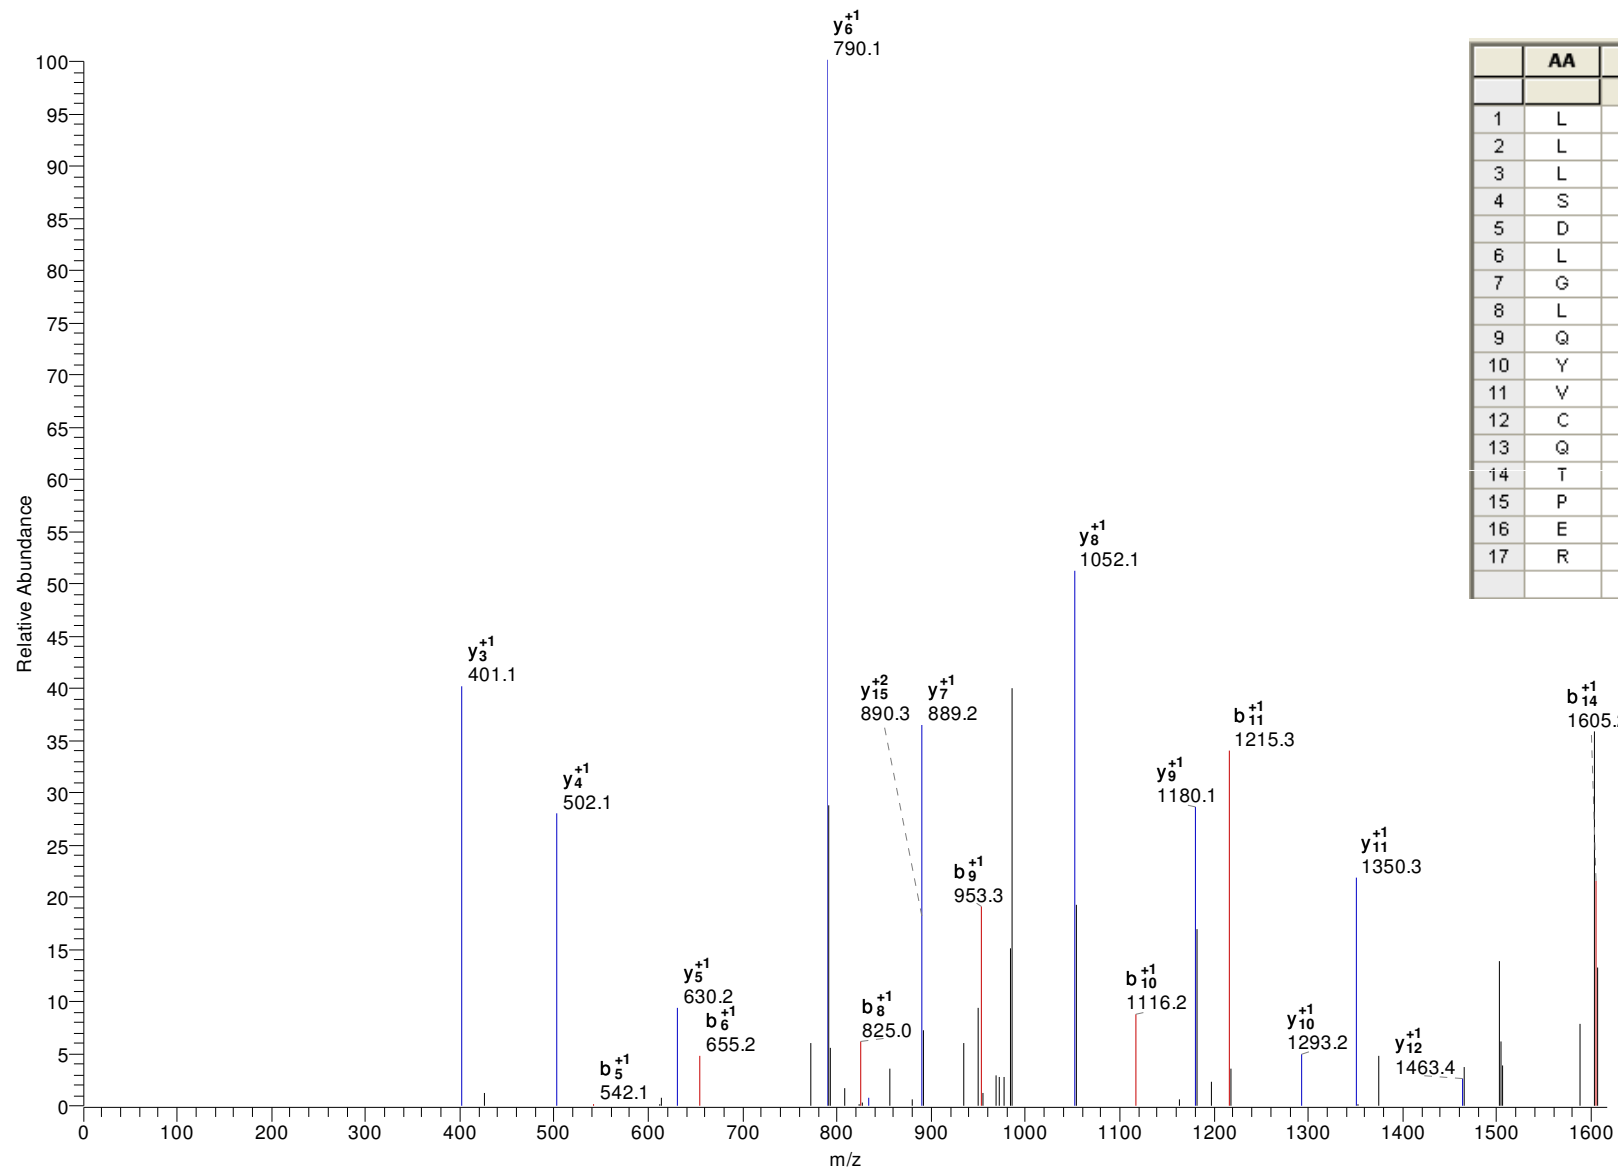

|    | AA | B                                   | Y                                   |    |
|----|----|-------------------------------------|-------------------------------------|----|
|    |    | <input checked="" type="checkbox"/> | <input checked="" type="checkbox"/> |    |
| 1  | L  | 114.09                              | -                                   | 17 |
| 2  | L  | 227.18                              | 1891.96                             | 16 |
| 3  | L  | 340.26                              | 1778.87                             | 15 |
| 4  | S  | 427.29                              | 1665.79                             | 14 |
| 5  | D  | 542.32                              | 1578.76                             | 13 |
| 6  | L  | 655.40                              | 1463.73                             | 12 |
| 7  | G  | 712.42                              | 1350.65                             | 11 |
| 8  | L  | 825.51                              | 1293.63                             | 10 |
| 9  | Q  | 953.57                              | 1180.54                             | 9  |
| 10 | Y  | 1116.63                             | 1052.48                             | 8  |
| 11 | V  | 1215.70                             | 889.42                              | 7  |
| 12 | C  | 1375.73                             | 790.35                              | 6  |
| 13 | Q  | 1503.79                             | 630.32                              | 5  |
| 14 | T  | 1604.84                             | 502.26                              | 4  |
| 15 | P  | 1701.89                             | 401.21                              | 3  |
| 16 | E  | 1830.93                             | 304.16                              | 2  |
| 17 | R  | -                                   | 175.12                              | 1  |

gi|70878269|gb|EAN91541.1| 25 kDa translation elongation factor 1-beta, putative [Trypanosoma cruzi]

K.LFNDLLGAENTSLYR.W

M+H=1725.880615

DeltaM=1.29399

z=2

P(pep)=1.41E-06

Xcorr=3.89

DCn=0.31

#5026-5026 NL: 1.57E2

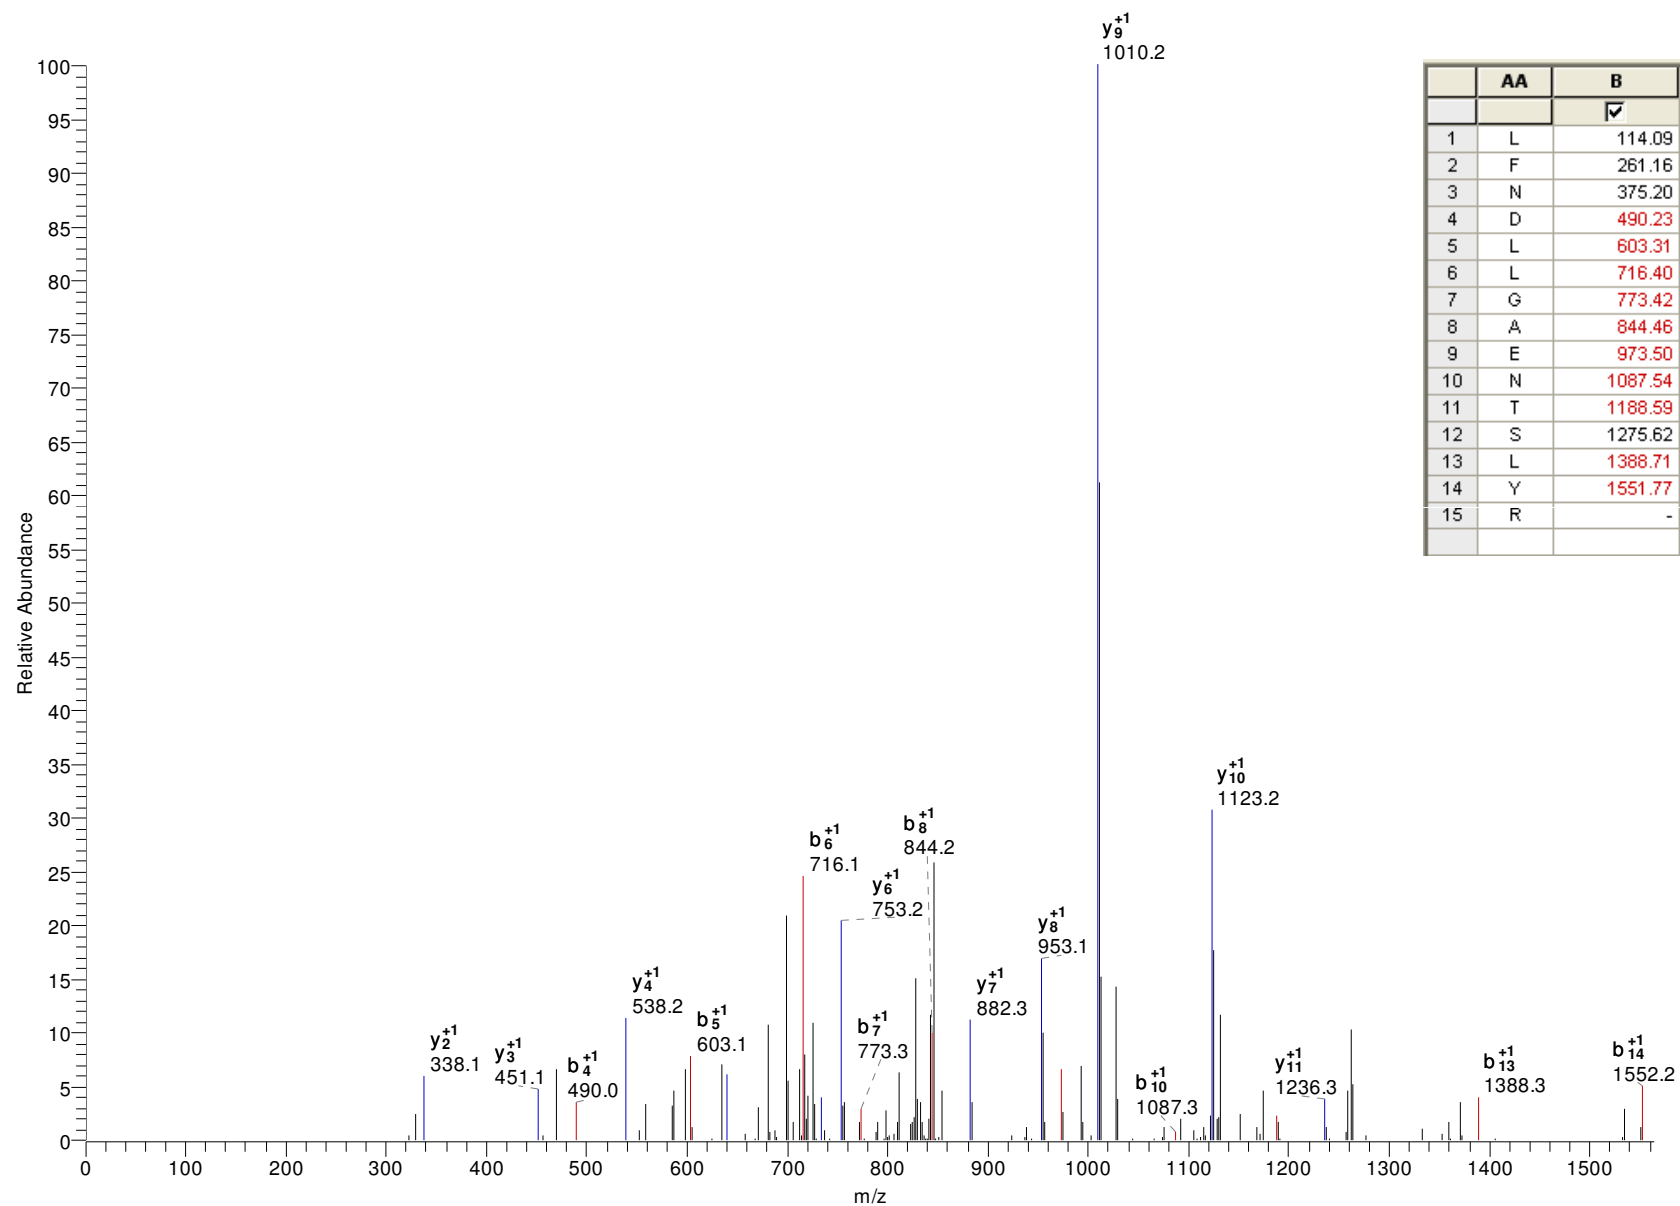

|    | AA | B       | Y       |    |
|----|----|---------|---------|----|
|    |    | ✓       | ✓       |    |
| 1  | L  | 114.09  | -       | 15 |
| 2  | F  | 261.16  | 1612.80 | 14 |
| 3  | N  | 375.20  | 1465.73 | 13 |
| 4  | D  | 490.23  | 1351.69 | 12 |
| 5  | L  | 603.31  | 1236.66 | 11 |
| 6  | L  | 716.40  | 1123.57 | 10 |
| 7  | G  | 773.42  | 1010.49 | 9  |
| 8  | A  | 844.46  | 953.47  | 8  |
| 9  | E  | 973.50  | 882.43  | 7  |
| 10 | N  | 1087.54 | 753.39  | 6  |
| 11 | T  | 1188.59 | 639.35  | 5  |
| 12 | S  | 1275.62 | 538.30  | 4  |
| 13 | L  | 1388.71 | 451.27  | 3  |
| 14 | Y  | 1551.77 | 338.18  | 2  |
| 15 | R  | -       | 175.12  | 1  |

gi|11027|emb|CAA44070.1| P0 ribosomal protein (carboxy terminal) [Trypanosoma cruzi]

K.TLLGASVATEYEFDEFDGK.N M+H=2091.975586 DeltaM=0.98515 z=2

P(pep)=1.12E-10 Xcorr=3.89 DCn=0.63

#5053-5053 NL: 8.02E1

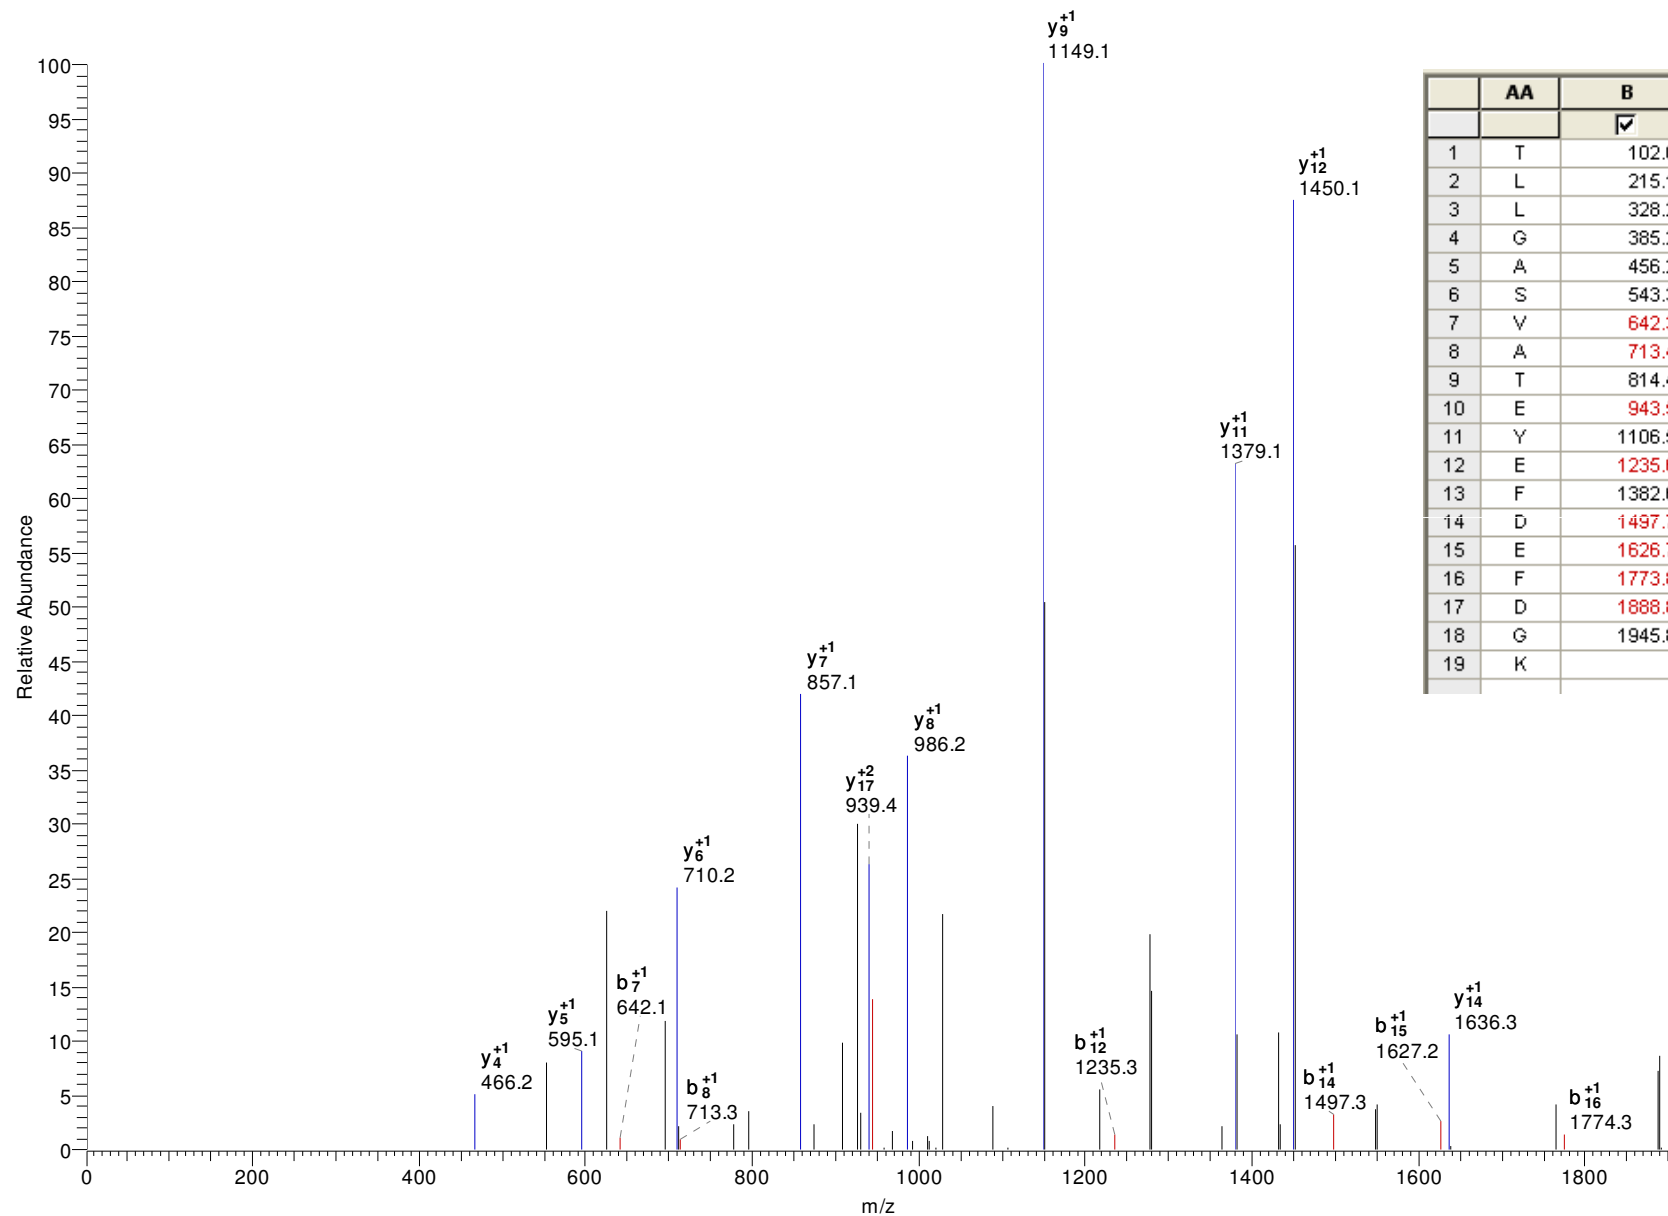

|    | AA | B       | Y       |    |
|----|----|---------|---------|----|
|    |    | ✓       | ✓       |    |
| 1  | T  | 102.05  | -       | 19 |
| 2  | L  | 215.14  | 1990.93 | 18 |
| 3  | L  | 328.22  | 1877.84 | 17 |
| 4  | G  | 385.24  | 1764.76 | 16 |
| 5  | A  | 456.28  | 1707.74 | 15 |
| 6  | S  | 543.31  | 1636.70 | 14 |
| 7  | V  | 642.38  | 1549.67 | 13 |
| 8  | A  | 713.42  | 1450.60 | 12 |
| 9  | T  | 814.47  | 1379.56 | 11 |
| 10 | E  | 943.51  | 1278.52 | 10 |
| 11 | Y  | 1106.57 | 1149.47 | 9  |
| 12 | E  | 1235.62 | 986.41  | 8  |
| 13 | F  | 1382.68 | 857.37  | 7  |
| 14 | D  | 1497.71 | 710.30  | 6  |
| 15 | E  | 1626.75 | 595.27  | 5  |
| 16 | F  | 1773.82 | 466.23  | 4  |
| 17 | D  | 1888.85 | 319.16  | 3  |
| 18 | G  | 1945.87 | 204.13  | 2  |
| 19 | K  | -       | 147.11  | 1  |



gi|70874520|gb|EAN88194.1| regulatory subunit of protein kinase a-like protein, putative [Trypanosoma cruzi]

K.HQILENVITTIDK.Y

M+H=1523.842773

DeltaM=1.34990

z=2

P(pep)=2.64E-05

Xcorr=3.87

DCn=0.38

#4403-4403 NL: 1.59E2

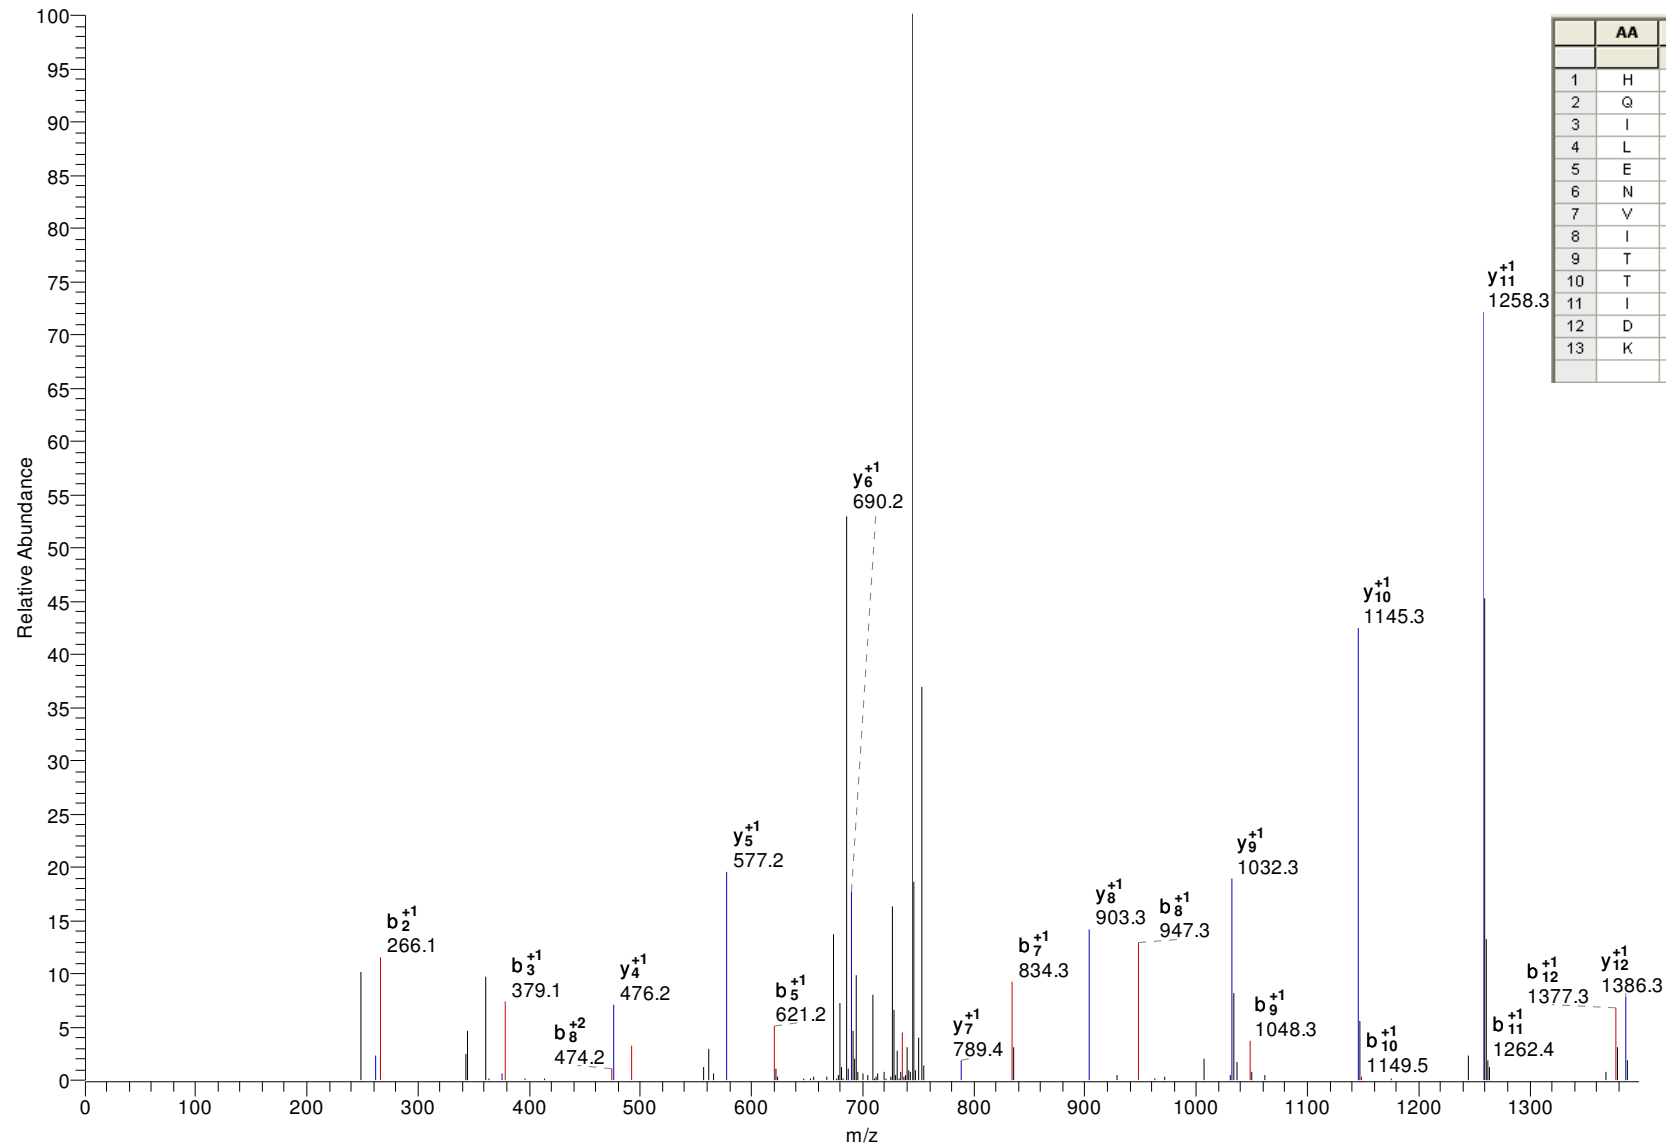

|    | AA | B       | Y       |    |
|----|----|---------|---------|----|
|    |    | ✓       | ✓       |    |
| 1  | H  | 138.07  | -       | 13 |
| 2  | Q  | 266.12  | 1386.78 | 12 |
| 3  | I  | 379.21  | 1258.73 | 11 |
| 4  | L  | 492.29  | 1145.64 | 10 |
| 5  | E  | 621.34  | 1032.56 | 9  |
| 6  | N  | 735.38  | 903.51  | 8  |
| 7  | V  | 834.45  | 789.47  | 7  |
| 8  | I  | 947.53  | 690.40  | 6  |
| 9  | T  | 1048.58 | 577.32  | 5  |
| 10 | T  | 1149.63 | 476.27  | 4  |
| 11 | I  | 1262.71 | 375.22  | 3  |
| 12 | D  | 1377.74 | 262.14  | 2  |
| 13 | K  | -       | 147.11  | 1  |

gi|70870091|gb|EAN84515.1| calpain-like cysteine peptidase, putative [Trypanosoma cruzi]

R.GFDEGNLLFR.I

M+H=1224.600708

DeltaM=1.65801

z=2

P(pep)=4.71E-06

Xcorr=3.83

DCN=0.40

#4597-4597 NL: 3.26E2

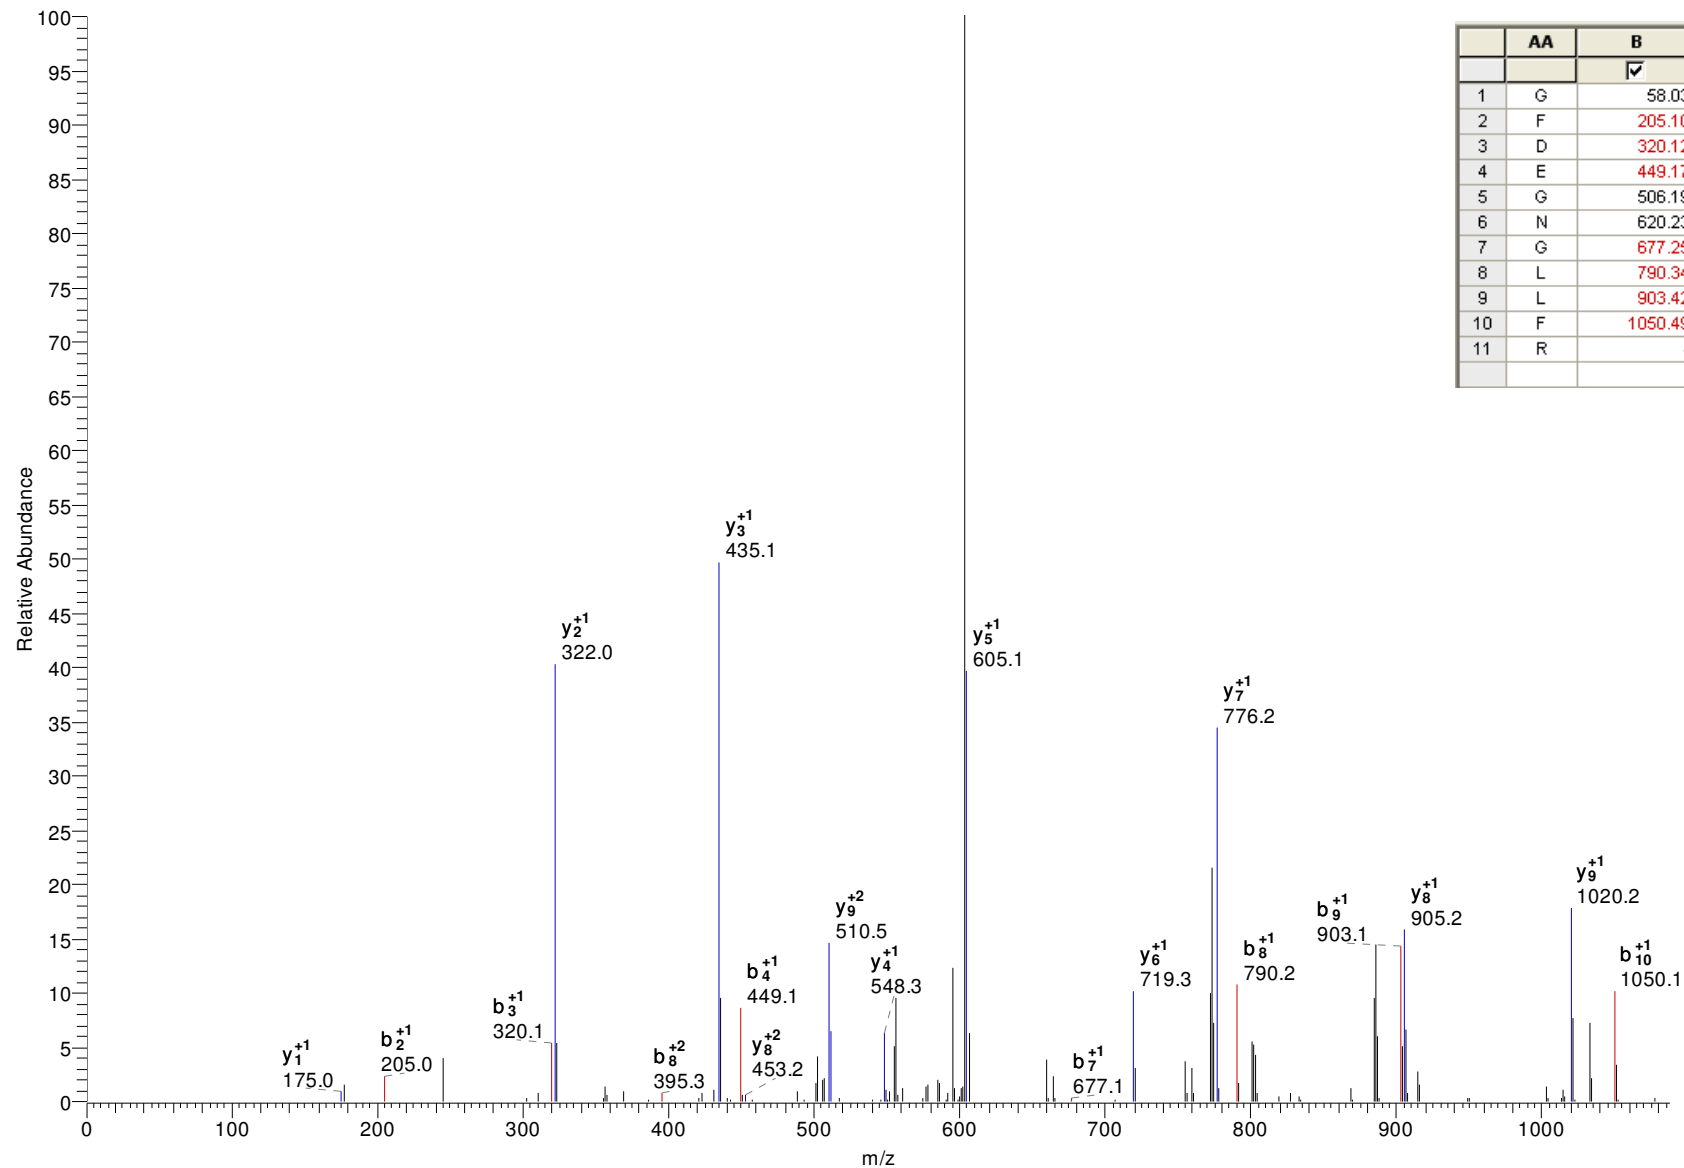

|    | AA | B                                   | Y                                   |    |
|----|----|-------------------------------------|-------------------------------------|----|
|    |    | <input checked="" type="checkbox"/> | <input checked="" type="checkbox"/> |    |
| 1  | G  | 58.03                               | -                                   | 11 |
| 2  | F  | 205.10                              | 1167.58                             | 10 |
| 3  | D  | 320.12                              | 1020.51                             | 9  |
| 4  | E  | 449.17                              | 905.48                              | 8  |
| 5  | G  | 506.19                              | 776.44                              | 7  |
| 6  | N  | 620.23                              | 719.42                              | 6  |
| 7  | G  | 677.25                              | 605.38                              | 5  |
| 8  | L  | 790.34                              | 548.36                              | 4  |
| 9  | L  | 903.42                              | 435.27                              | 3  |
| 10 | F  | 1050.49                             | 322.19                              | 2  |
| 11 | R  | -                                   | 175.12                              | 1  |

gi|70885176|gb|EAN98005.1| procyclic form surface glycoprotein, putative [Trypanosoma cruzi]

K.GVDGATSVFAEAVVPVSQR.S

M+H=1888.976318

DeltaM=0.65117

z=2

P(pep)=8.73E-05

Xcorr=3.83E+00

DCn=0.41

#4530-4530 NL: 2.46E2

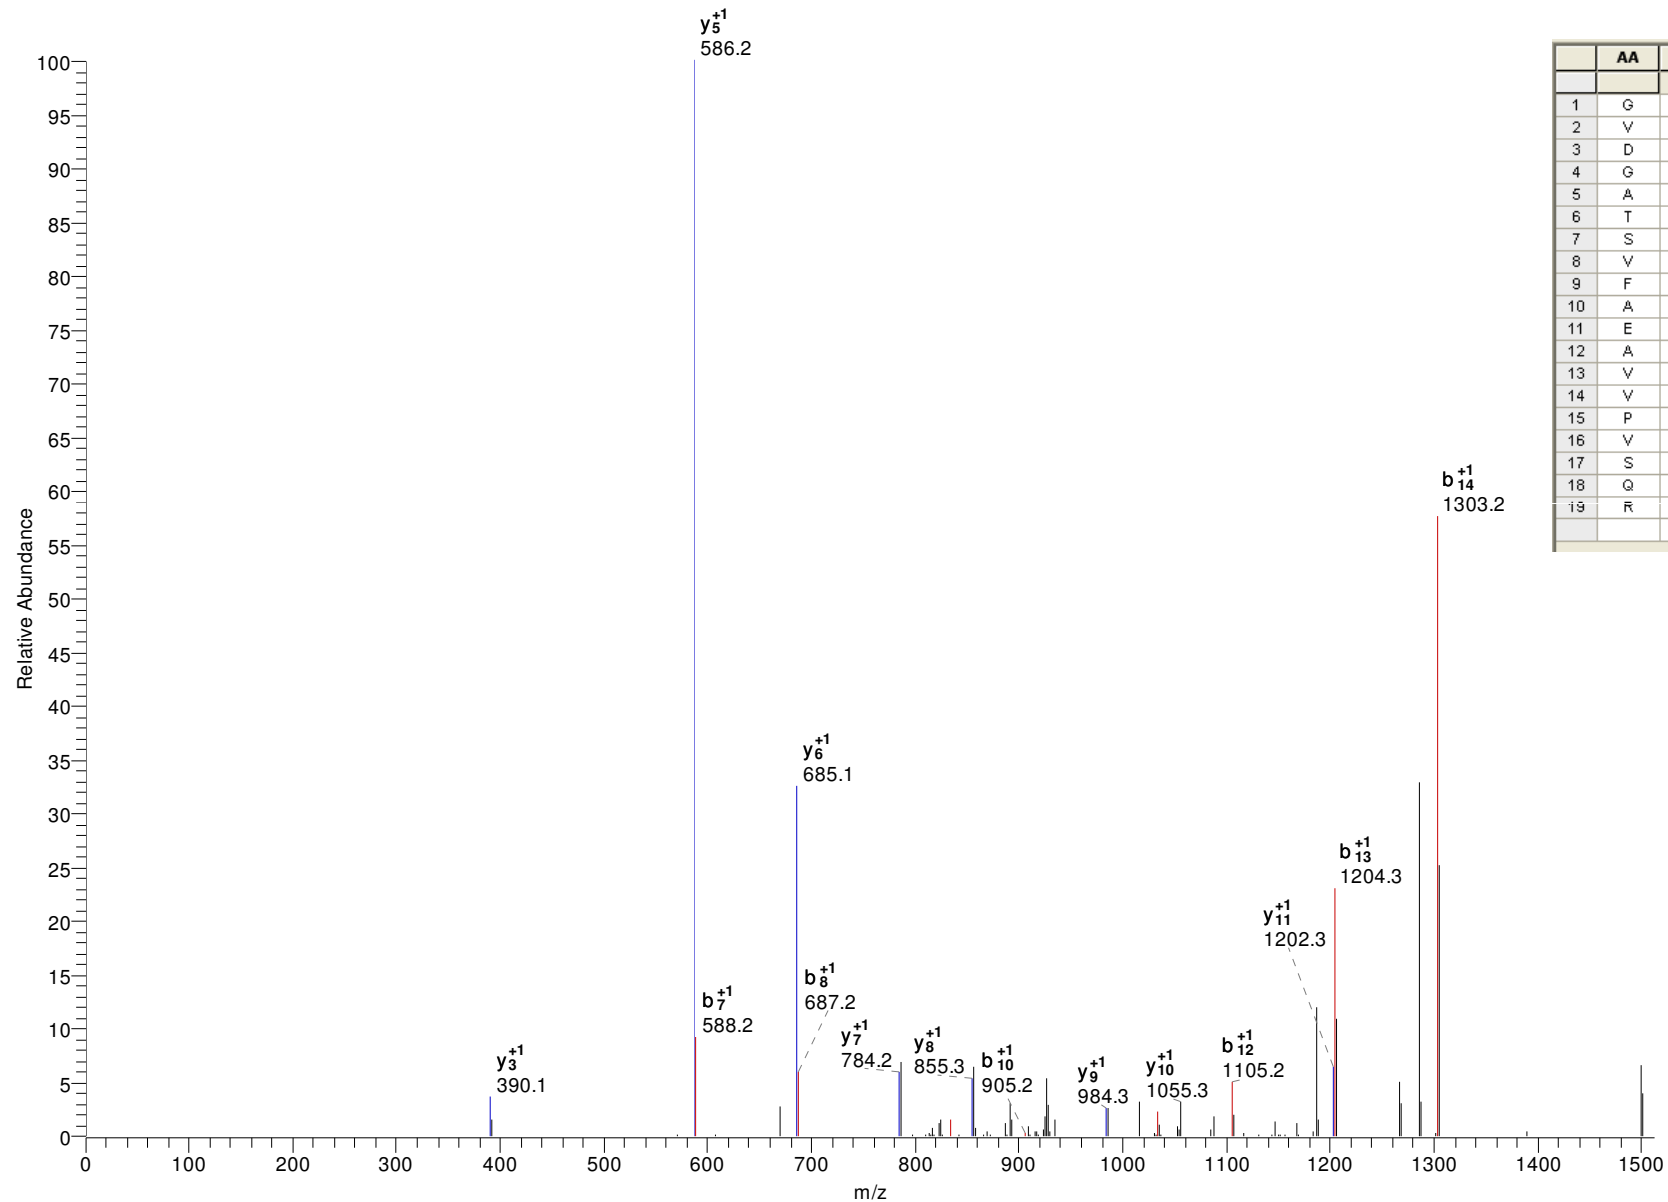

|    | AA | B       | Y       |    |
|----|----|---------|---------|----|
|    |    | ✓       | ✓       |    |
| 1  | G  | 58.03   | -       | 19 |
| 2  | V  | 157.10  | 1831.95 | 18 |
| 3  | D  | 272.12  | 1732.89 | 17 |
| 4  | G  | 329.15  | 1617.86 | 16 |
| 5  | A  | 400.18  | 1560.84 | 15 |
| 6  | T  | 501.23  | 1489.80 | 14 |
| 7  | S  | 588.26  | 1388.75 | 13 |
| 8  | V  | 687.33  | 1301.72 | 12 |
| 9  | F  | 834.40  | 1202.65 | 11 |
| 10 | A  | 905.44  | 1055.58 | 10 |
| 11 | E  | 1034.48 | 984.55  | 9  |
| 12 | A  | 1105.52 | 855.50  | 8  |
| 13 | V  | 1204.58 | 784.47  | 7  |
| 14 | V  | 1303.65 | 685.40  | 6  |
| 15 | P  | 1400.71 | 586.33  | 5  |
| 16 | V  | 1499.77 | 489.28  | 4  |
| 17 | S  | 1586.81 | 390.21  | 3  |
| 18 | Q  | 1714.86 | 303.18  | 2  |
| 19 | R  | -       | 175.12  | 1  |

gi|70878473|gb|EAN91726.1| ubiquitin-like protein, putative [Trypanosoma cruzi]

R.INVSGVRPEHTISDLEVDLDAGVEGLR.R M+H=2890.490479

DeltaM=0.78879

z=3

P(pep)3.80E-05

Xcorr=3.82

DCn=0.41

#5747-5747 NL: 1.30E1

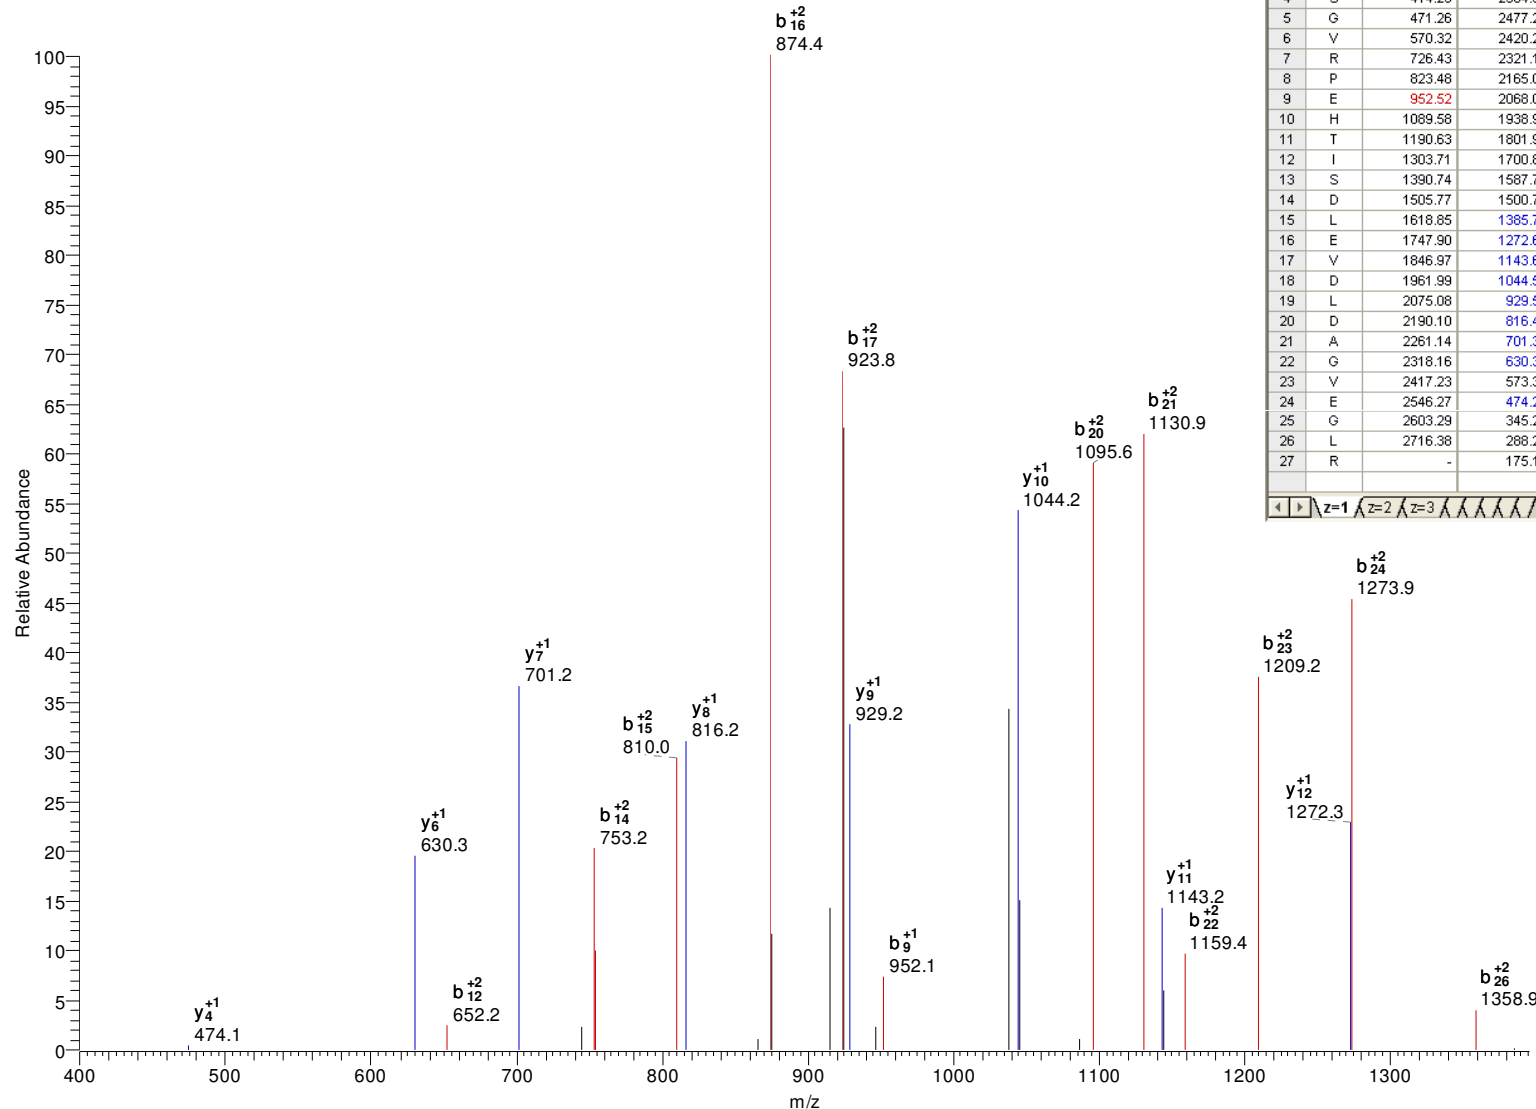

|    |   | ✓       | ✓       |    | AA | B       | Y       |    |
|----|---|---------|---------|----|----|---------|---------|----|
| 1  | I | 114.09  | -       | 27 |    | ✓       | ✓       |    |
| 2  | N | 228.13  | 2777.41 | 26 | I  | 57.55   | -       | 27 |
| 3  | V | 327.20  | 2663.36 | 25 | N  | 114.57  | 1389.21 | 26 |
| 4  | S | 414.23  | 2564.30 | 24 | V  | 164.10  | 1332.19 | 25 |
| 5  | G | 471.26  | 2477.26 | 23 | S  | 207.62  | 1282.65 | 24 |
| 6  | V | 570.32  | 2420.24 | 22 | G  | 236.13  | 1239.14 | 23 |
| 7  | R | 726.43  | 2321.17 | 21 | V  | 285.67  | 1210.62 | 22 |
| 8  | P | 823.48  | 2165.07 | 20 | R  | 363.72  | 1161.09 | 21 |
| 9  | E | 952.52  | 2068.02 | 19 | P  | 412.24  | 1083.04 | 20 |
| 10 | H | 1089.58 | 1938.98 | 18 | E  | 476.76  | 1034.51 | 19 |
| 11 | T | 1190.63 | 1801.92 | 17 | H  | 545.29  | 969.99  | 18 |
| 12 | I | 1303.71 | 1700.87 | 16 | T  | 595.82  | 901.46  | 17 |
| 13 | S | 1390.74 | 1587.79 | 15 | I  | 652.36  | 850.94  | 16 |
| 14 | D | 1505.77 | 1500.75 | 14 | S  | 695.88  | 794.40  | 15 |
| 15 | L | 1618.85 | 1385.73 | 13 | D  | 753.39  | 750.88  | 14 |
| 16 | E | 1747.90 | 1272.64 | 12 | L  | 809.93  | 693.37  | 13 |
| 17 | V | 1846.97 | 1143.60 | 11 | E  | 874.45  | 636.83  | 12 |
| 18 | D | 1961.99 | 1044.53 | 10 | V  | 923.99  | 572.30  | 11 |
| 19 | L | 2075.08 | 929.51  | 9  | D  | 981.50  | 522.77  | 10 |
| 20 | D | 2190.10 | 816.42  | 8  | L  | 1038.04 | 465.26  | 9  |
| 21 | A | 2261.14 | 701.39  | 7  | D  | 1095.56 | 408.71  | 8  |
| 22 | G | 2318.16 | 630.36  | 6  | A  | 1131.07 | 351.20  | 7  |
| 23 | V | 2417.23 | 573.34  | 5  | G  | 1159.58 | 315.68  | 6  |
| 24 | E | 2546.27 | 474.27  | 4  | V  | 1209.12 | 287.17  | 5  |
| 25 | G | 2603.29 | 345.22  | 3  | E  | 1273.64 | 237.64  | 4  |
| 26 | L | 2716.38 | 288.20  | 2  | G  | 1302.15 | 173.12  | 3  |
| 27 | R | -       | 175.12  | 1  | L  | 1358.69 | 144.61  | 2  |
|    |   |         |         |    | R  | -       | 88.06   | 1  |

gi|70879340|gb|EAN92523.1| endo-beta-N-acetylglucosaminidase, putative [Trypanosoma cruzi]  
 K.EFYFDGGTGIVHESPGK.T M+H=1839.854858 DeltaM=0.23381 z=2  
 P(pep)=2.52E-06 Xcorr=3.64 DCn=0.58

#3830-3830 NL: 1.63E2

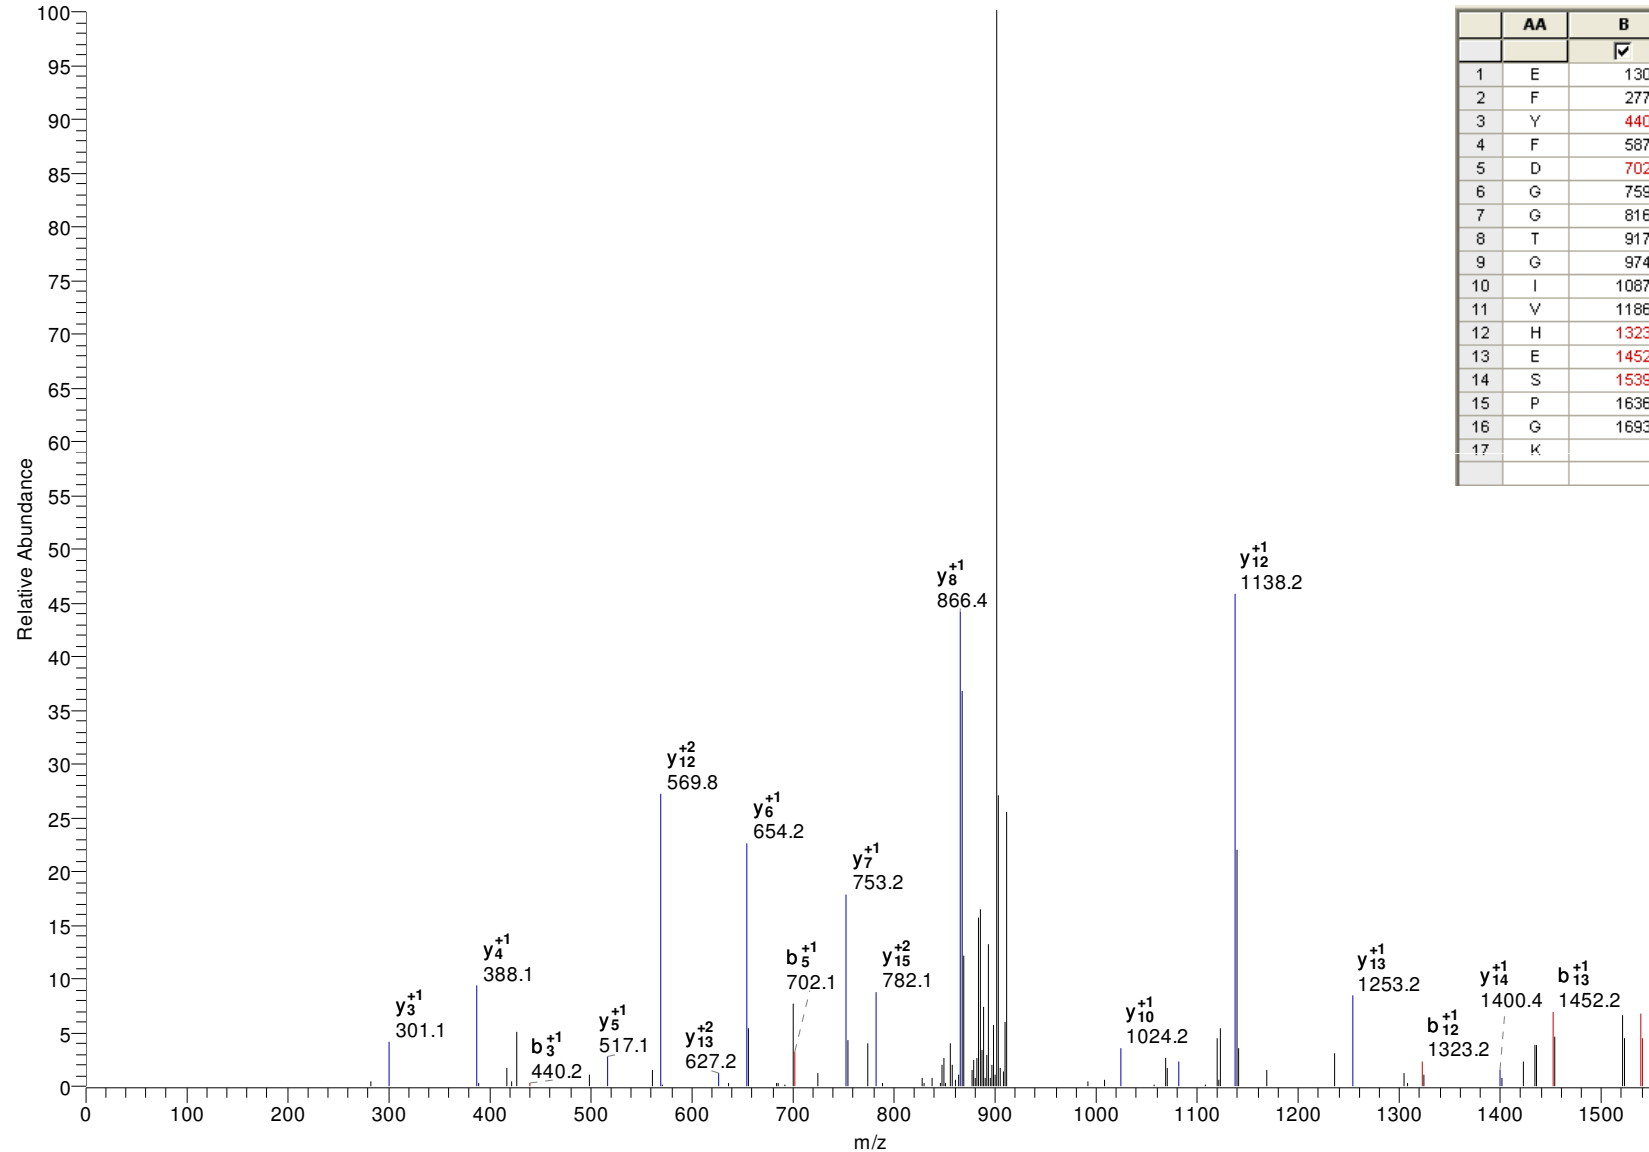

|    | AA | B       | Y       |    |
|----|----|---------|---------|----|
|    |    | ☑       | ☑       |    |
| 1  | E  | 130.05  | -       | 17 |
| 2  | F  | 277.12  | 1710.81 | 16 |
| 3  | Y  | 440.18  | 1563.74 | 15 |
| 4  | F  | 587.25  | 1400.68 | 14 |
| 5  | D  | 702.28  | 1253.61 | 13 |
| 6  | G  | 759.30  | 1138.59 | 12 |
| 7  | G  | 816.32  | 1081.56 | 11 |
| 8  | T  | 917.37  | 1024.54 | 10 |
| 9  | G  | 974.39  | 923.49  | 9  |
| 10 | I  | 1087.47 | 866.47  | 8  |
| 11 | V  | 1186.54 | 753.39  | 7  |
| 12 | H  | 1323.60 | 654.32  | 6  |
| 13 | E  | 1452.64 | 517.26  | 5  |
| 14 | S  | 1539.68 | 388.22  | 4  |
| 15 | P  | 1636.73 | 301.19  | 3  |
| 16 | G  | 1693.75 | 204.13  | 2  |
| 17 | K  | -       | 147.11  | 1  |

gi|70876359|gb|EAN89821.1| hypothetical protein, conserved [Trypanosoma cruzi]  
 R.VTQTLQCGDLACDTR.G M+H=1852.816406 DeltaM=0.87578 z=2  
 (Pep)=7.98E-09 Xcorr=3.61 DCn=0.54

#2711-2711 NL:1.31E2

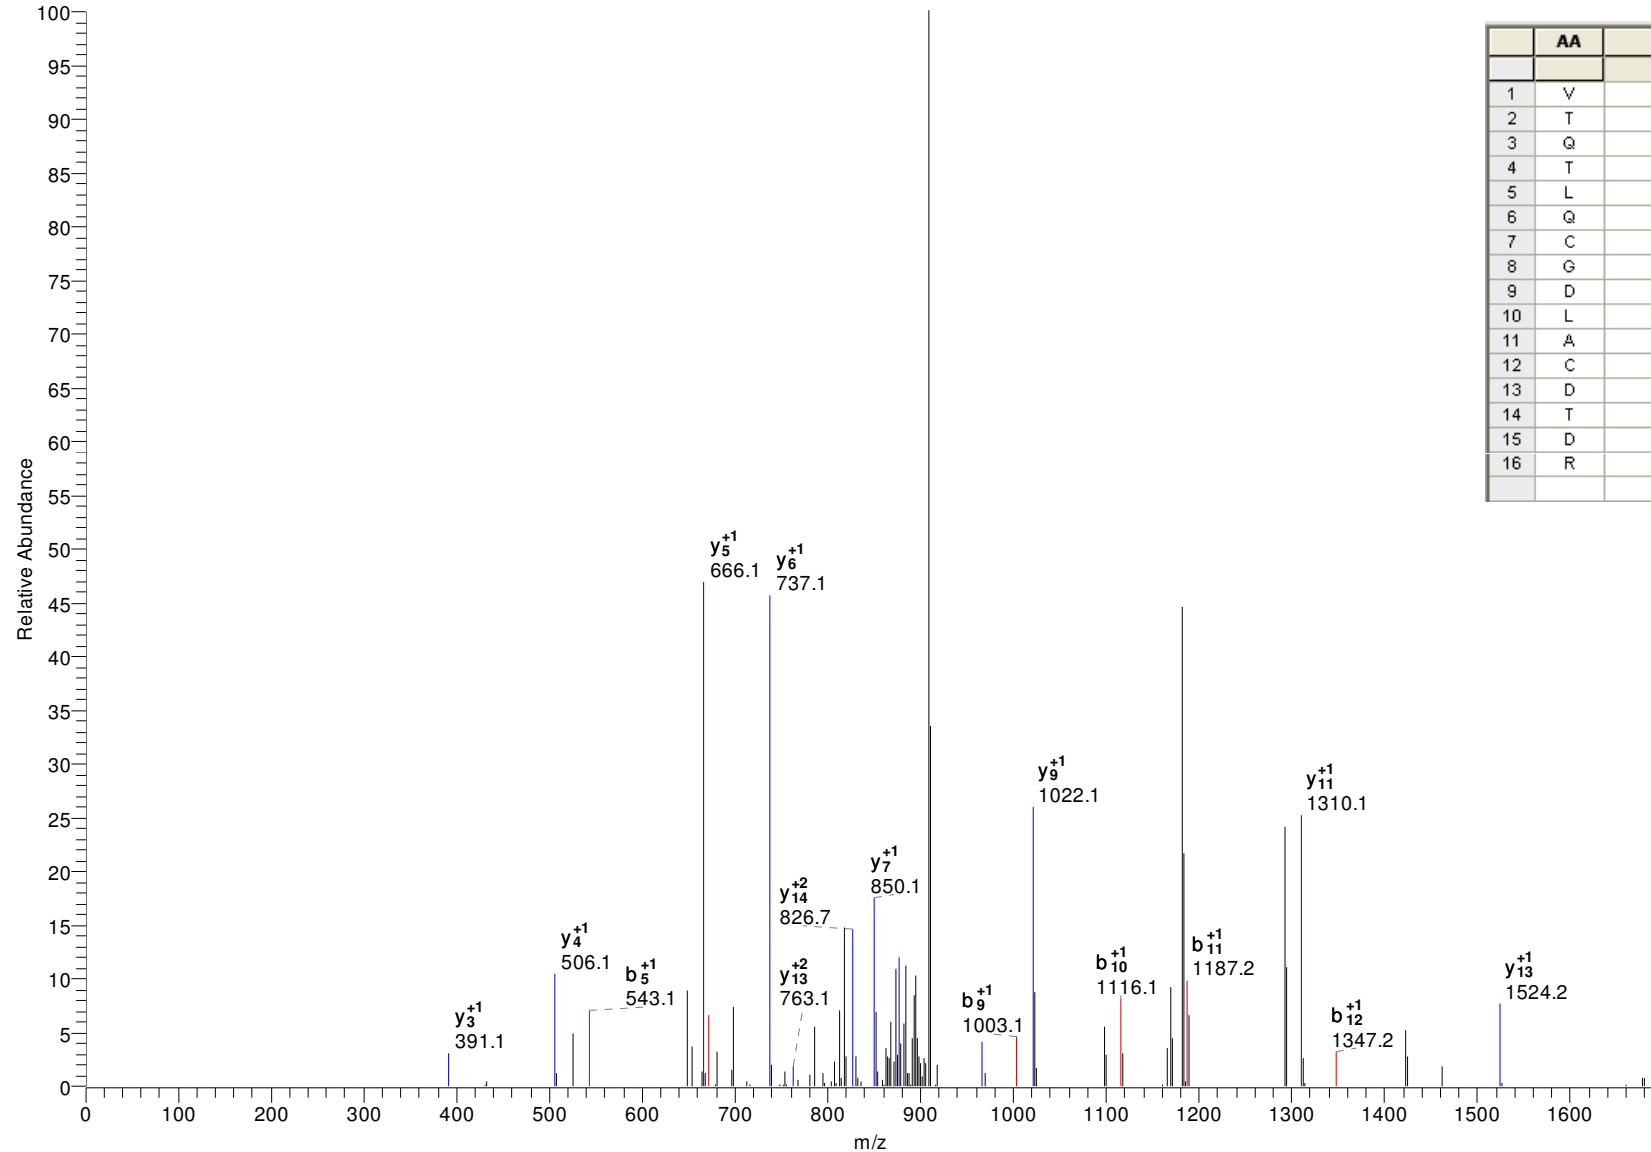

|    | AA | B       | Y       |    |
|----|----|---------|---------|----|
|    |    | ✓       | ✓       |    |
| 1  | V  | 100.08  | -       | 16 |
| 2  | T  | 201.12  | 1753.75 | 15 |
| 3  | Q  | 329.18  | 1652.70 | 14 |
| 4  | T  | 430.23  | 1524.64 | 13 |
| 5  | L  | 543.31  | 1423.59 | 12 |
| 6  | Q  | 671.37  | 1310.51 | 11 |
| 7  | C  | 831.40  | 1182.45 | 10 |
| 8  | G  | 888.42  | 1022.42 | 9  |
| 9  | D  | 1003.45 | 965.40  | 8  |
| 10 | L  | 1116.54 | 850.37  | 7  |
| 11 | A  | 1187.57 | 737.29  | 6  |
| 12 | C  | 1347.60 | 666.25  | 5  |
| 13 | D  | 1462.63 | 506.22  | 4  |
| 14 | T  | 1563.68 | 391.19  | 3  |
| 15 | D  | 1678.70 | 290.15  | 2  |
| 16 | R  | -       | 175.12  | 1  |

gi|70881383|gb|EAN94417.1| hypothetical protein, conserved [Trypanosoma cruzi]

R.AAAASTADTHPTT.-

M+H1214.564819

DeltaM=1.46196

z=2

P(pep)=9.49E-06

Xcorr=3.59

DCn=0.60

#2110-2110 NL:2.70E2

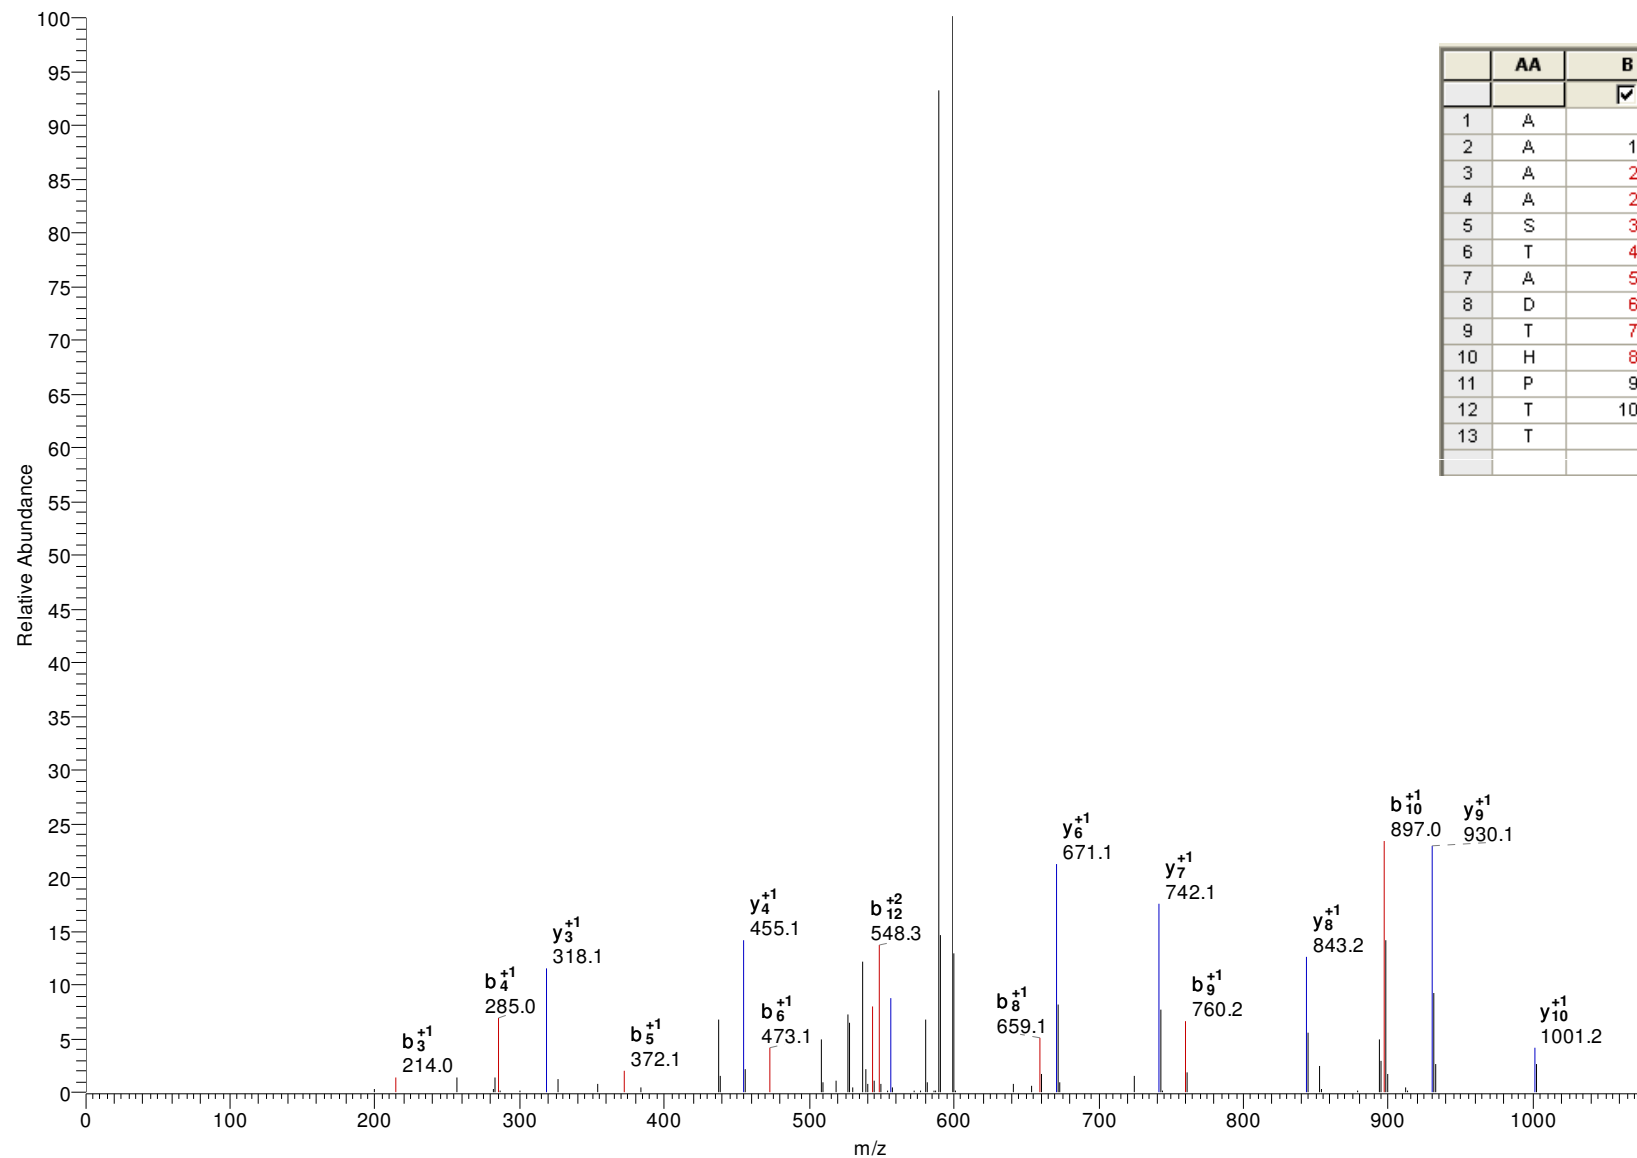

|    | AA | B       | Y       |    |
|----|----|---------|---------|----|
| 1  | A  | 72.04   | -       | 13 |
| 2  | A  | 143.08  | 1143.53 | 12 |
| 3  | A  | 214.12  | 1072.49 | 11 |
| 4  | A  | 285.16  | 1001.45 | 10 |
| 5  | S  | 372.19  | 930.42  | 9  |
| 6  | T  | 473.24  | 843.38  | 8  |
| 7  | A  | 544.27  | 742.34  | 7  |
| 8  | D  | 659.30  | 671.30  | 6  |
| 9  | T  | 760.35  | 556.27  | 5  |
| 10 | H  | 897.41  | 455.22  | 4  |
| 11 | P  | 994.46  | 318.17  | 3  |
| 12 | T  | 1095.51 | 221.11  | 2  |
| 13 | T  | -       | 120.07  | 1  |

gi|70880634|gb|EAN93719.1| membrane-bound acid phosphatase 2, putative [Trypanosoma cruzi]

K.EAFSEGYCSDPANR.W

M+H=1602.648926

DeltaM=0.47978

z=2

P(pep)=6.54E-08

Xcorr=3.55

DCn=0.57

#2593-2593 NL: 1.41E2

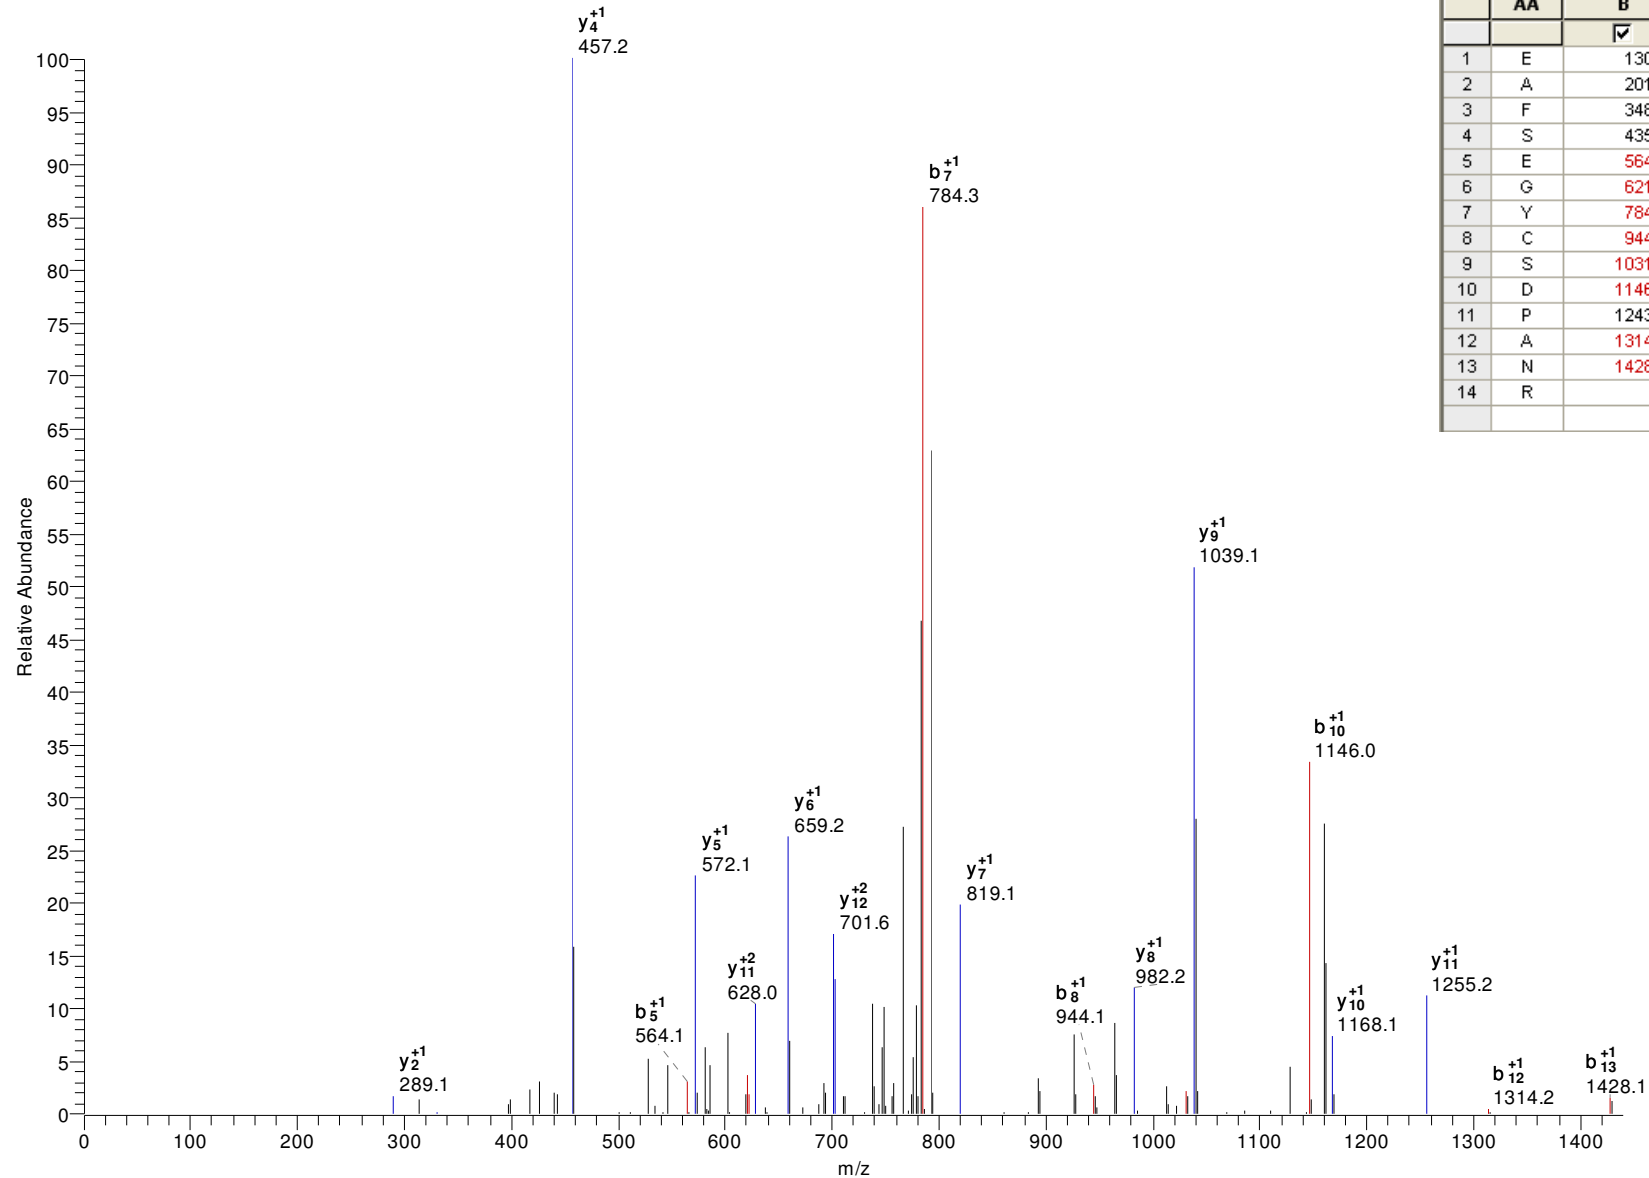

|    | AA | B                                   | Y                                   |    |
|----|----|-------------------------------------|-------------------------------------|----|
|    |    | <input checked="" type="checkbox"/> | <input checked="" type="checkbox"/> |    |
| 1  | E  | 130.05                              | -                                   | 14 |
| 2  | A  | 201.09                              | 1473.61                             | 13 |
| 3  | F  | 348.16                              | 1402.57                             | 12 |
| 4  | S  | 435.19                              | 1255.50                             | 11 |
| 5  | E  | 564.23                              | 1168.47                             | 10 |
| 6  | G  | 621.25                              | 1039.43                             | 9  |
| 7  | Y  | 784.31                              | 982.40                              | 8  |
| 8  | C  | 944.35                              | 819.34                              | 7  |
| 9  | S  | 1031.38                             | 659.31                              | 6  |
| 10 | D  | 1146.40                             | 572.28                              | 5  |
| 11 | P  | 1243.46                             | 457.25                              | 4  |
| 12 | A  | 1314.49                             | 360.20                              | 3  |
| 13 | N  | 1428.54                             | 289.16                              | 2  |
| 14 | R  | -                                   | 175.12                              | 1  |



gi|3088522|gb|AAD03404.1| cathepsin B-like protease precursor [Trypanosoma cruzi]  
 R.GVDECGIEGSGVAGIPR.I M+H=1672.795898 DeltaM=1.29521  
 P(pep)=3.71E-08 Xcorr=3.55 DCn=0.64

z=2

#3342-3342 NL: 9.68E1

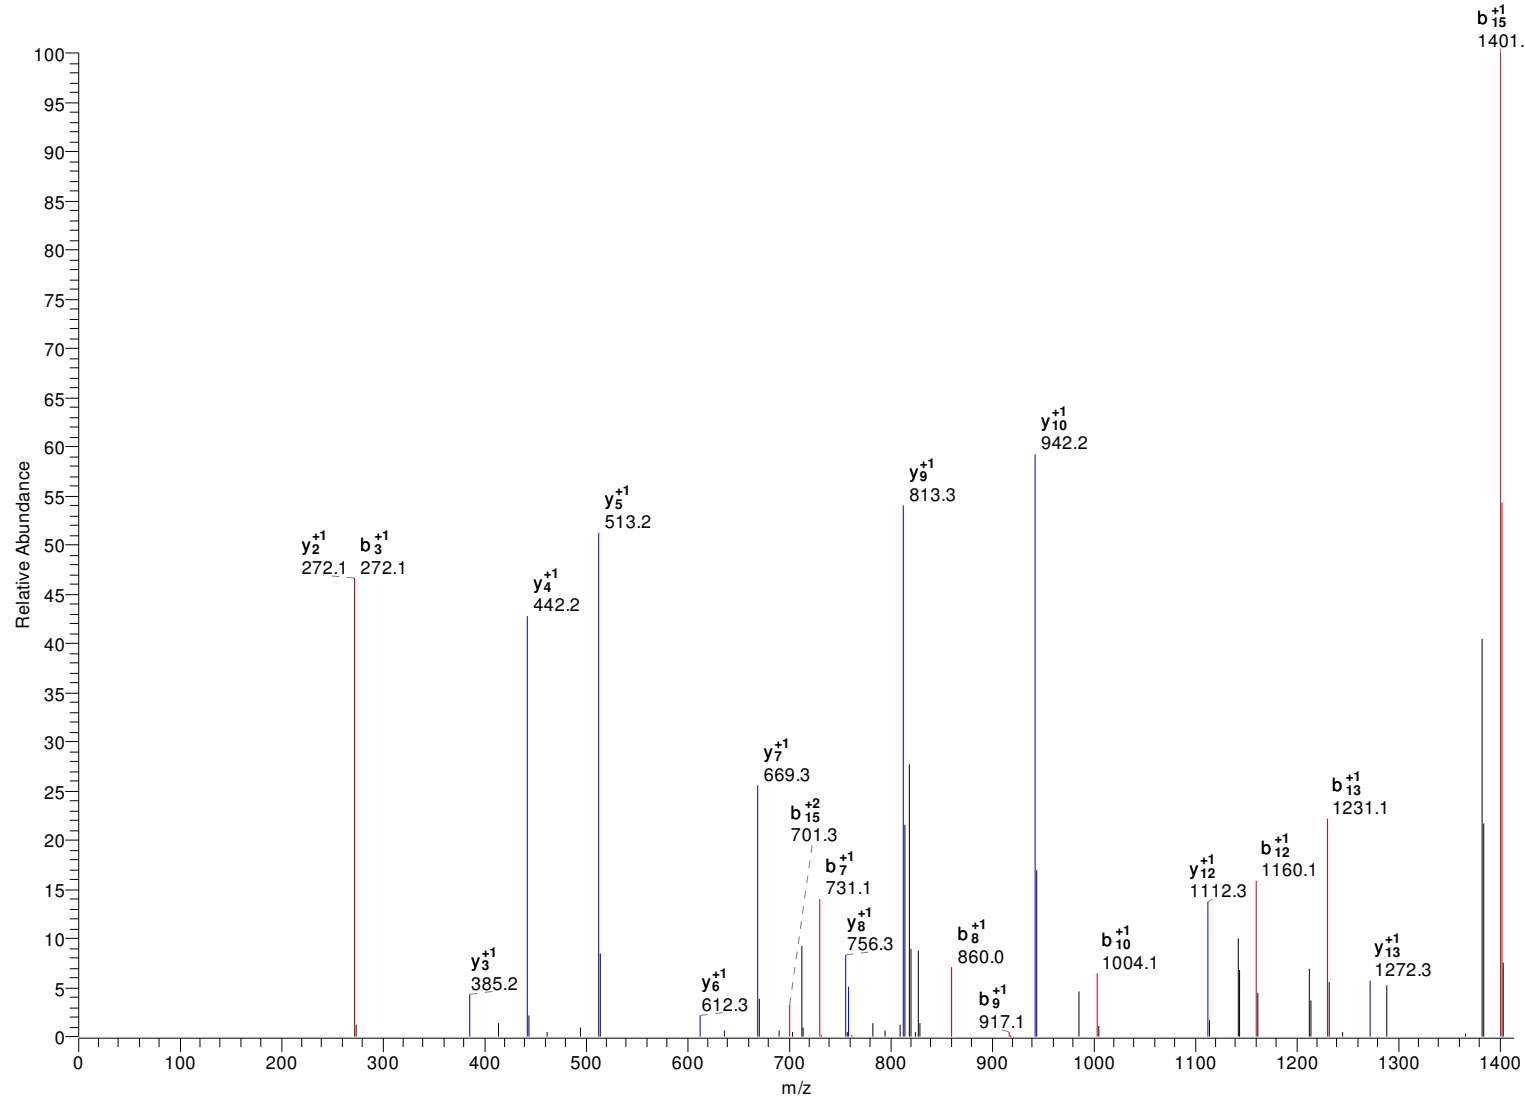

b<sub>15</sub><sup>+1</sup>  
1401.1

|    | AA | B       | Y       |    |
|----|----|---------|---------|----|
|    |    | ✓       | ✓       |    |
| 1  | G  | 58.03   | -       | 17 |
| 2  | V  | 157.10  | 1615.77 | 16 |
| 3  | D  | 272.12  | 1516.71 | 15 |
| 4  | E  | 401.17  | 1401.68 | 14 |
| 5  | C  | 561.20  | 1272.64 | 13 |
| 6  | G  | 618.22  | 1112.61 | 12 |
| 7  | I  | 731.30  | 1055.58 | 11 |
| 8  | E  | 860.35  | 942.50  | 10 |
| 9  | G  | 917.37  | 813.46  | 9  |
| 10 | S  | 1004.40 | 756.44  | 8  |
| 11 | G  | 1061.42 | 669.40  | 7  |
| 12 | V  | 1160.49 | 612.38  | 6  |
| 13 | A  | 1231.53 | 513.31  | 5  |
| 14 | G  | 1288.55 | 442.28  | 4  |
| 15 | I  | 1401.63 | 385.26  | 3  |
| 16 | P  | 1498.68 | 272.17  | 2  |
| 17 | R  | -       | 175.12  | 1  |

gi|70884760|gb|EAN97607.1| ADP,ATP carrier protein 1, mitochondrial precursor, putative [Trypanosoma cruzi]

R.LDRPYTGVADCFVHTMK.T

M+H=2009.957275

Delta=1.93235

z=3

P(pep)=9.85E-06

Xcorr=3.54

DCn=0.36

#3915-3915 NL: 2.66E1

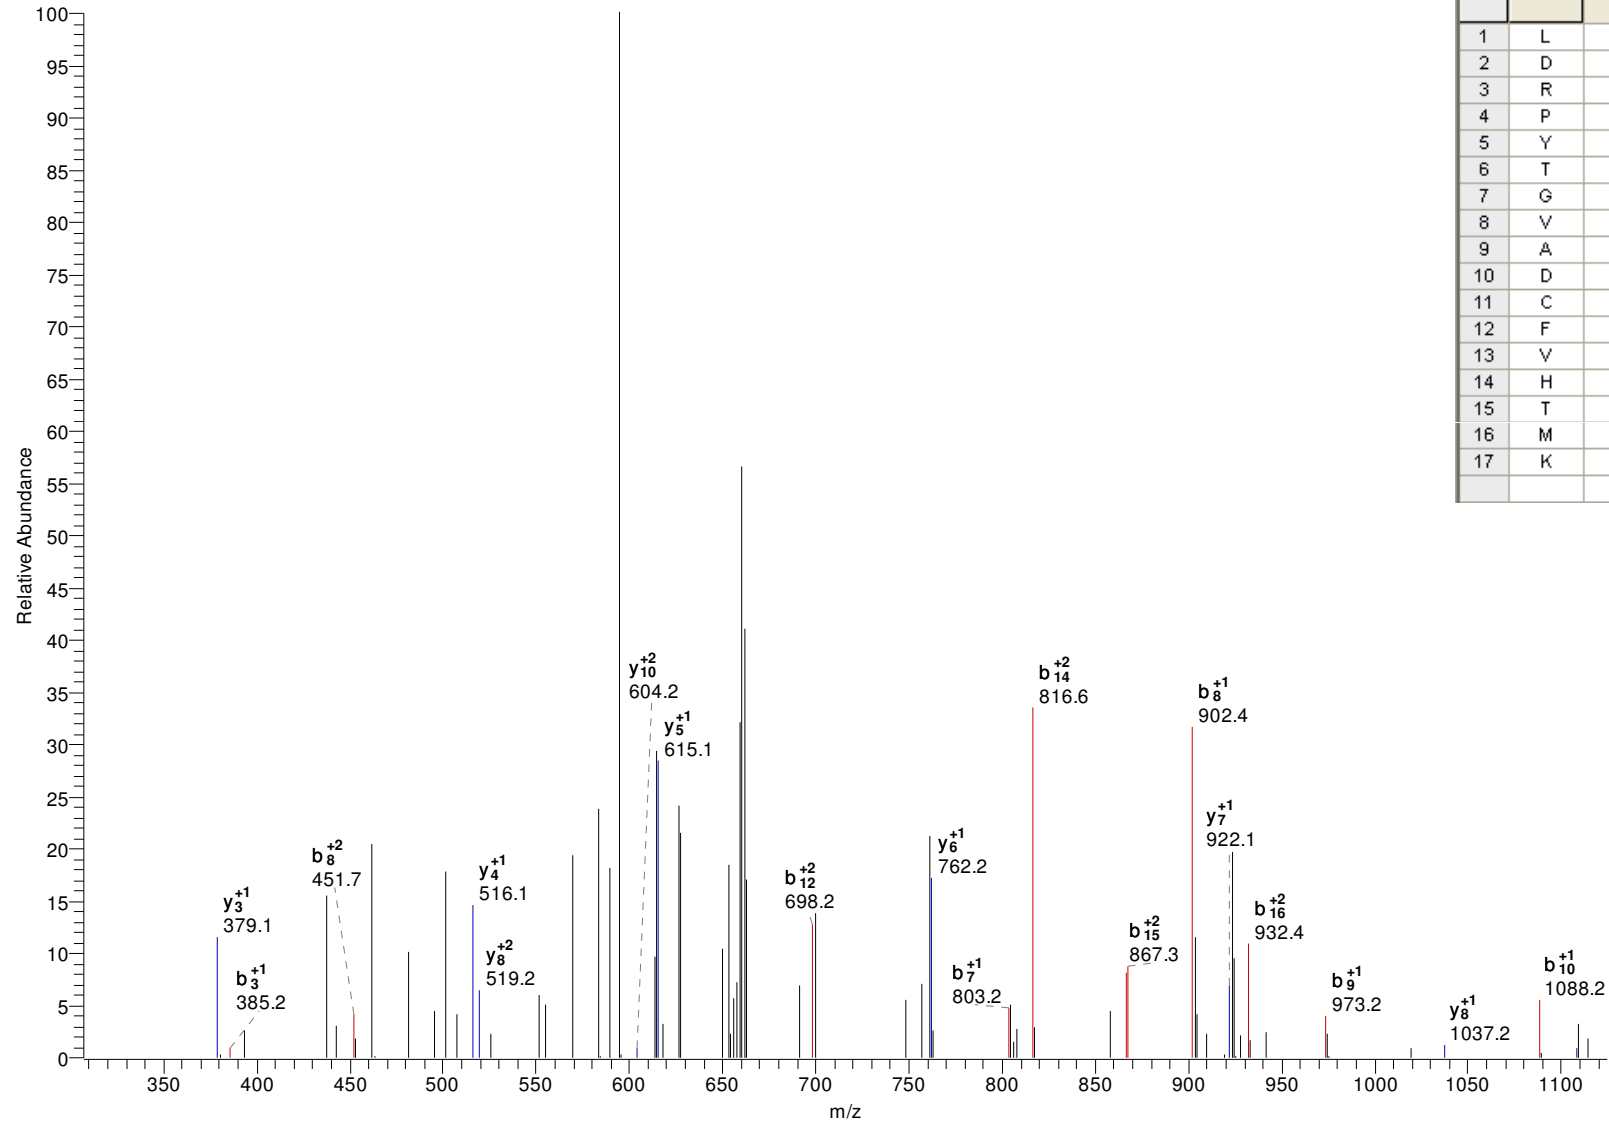

|    | AA | B       | Y       |    |
|----|----|---------|---------|----|
|    |    | ✓       | ✓       |    |
| 1  | L  | 114.09  | -       | 17 |
| 2  | D  | 229.12  | 1896.87 | 16 |
| 3  | R  | 385.22  | 1781.85 | 15 |
| 4  | P  | 482.27  | 1625.75 | 14 |
| 5  | Y  | 645.34  | 1528.69 | 13 |
| 6  | T  | 746.38  | 1365.63 | 12 |
| 7  | G  | 803.40  | 1264.58 | 11 |
| 8  | V  | 902.47  | 1207.56 | 10 |
| 9  | A  | 973.51  | 1108.49 | 9  |
| 10 | D  | 1088.54 | 1037.45 | 8  |
| 11 | C  | 1248.57 | 922.43  | 7  |
| 12 | F  | 1395.64 | 762.40  | 6  |
| 13 | V  | 1494.70 | 615.33  | 5  |
| 14 | H  | 1631.76 | 516.26  | 4  |
| 15 | T  | 1732.81 | 379.20  | 3  |
| 16 | M  | 1863.85 | 278.15  | 2  |
| 17 | K  | -       | 147.11  | 1  |

gi|70866876|gb|EAN82242.1| co-chaperone GrpE, putative [Trypanosoma cruzi]

K.DMLEVVDTLEK.G M+H=1291.64502 DeltaM=0.95012 z=2

P(pep)=7.43E-05 Xcorr=3.53 DCn=0.40

#4928-4928 NL: 5.94E1

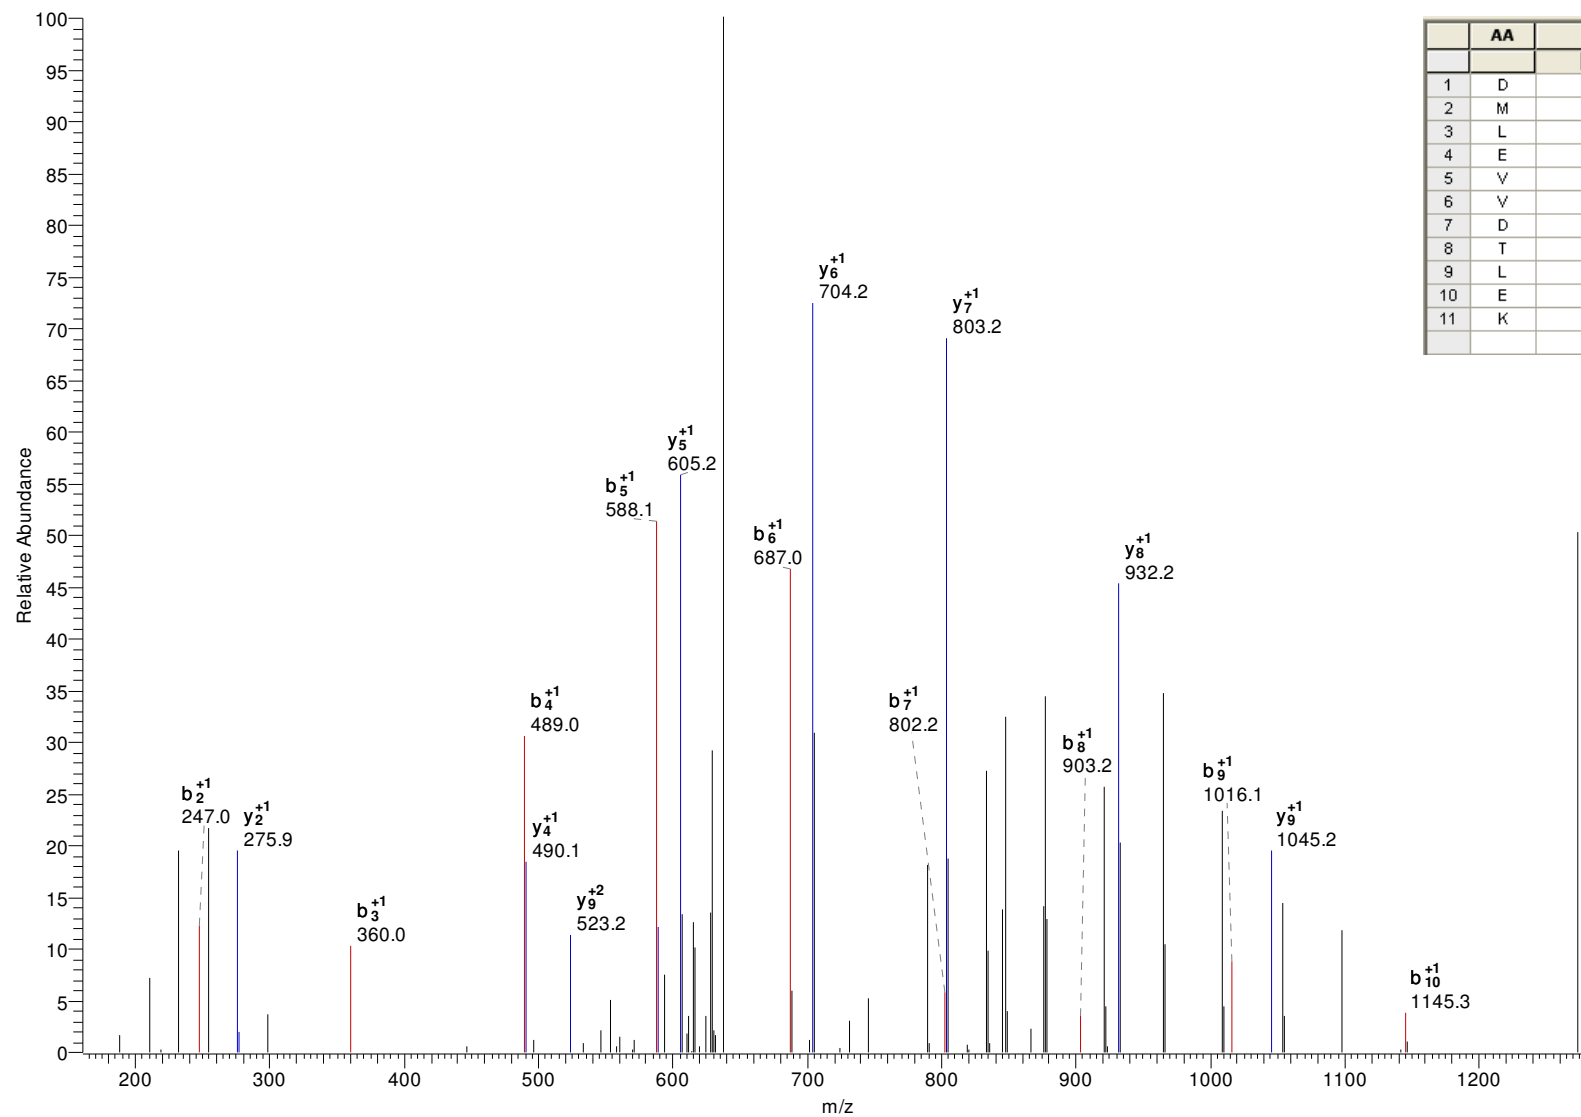

|    | AA | B       | Y       |    |
|----|----|---------|---------|----|
|    |    | ☑       | ☑       |    |
| 1  | D  | 116.03  | -       | 11 |
| 2  | M  | 247.07  | 1176.62 | 10 |
| 3  | L  | 360.16  | 1045.58 | 9  |
| 4  | E  | 489.20  | 932.49  | 8  |
| 5  | V  | 588.27  | 803.45  | 7  |
| 6  | V  | 687.34  | 704.38  | 6  |
| 7  | D  | 802.37  | 605.31  | 5  |
| 8  | T  | 903.41  | 490.29  | 4  |
| 9  | L  | 1016.50 | 389.24  | 3  |
| 10 | E  | 1145.54 | 276.16  | 2  |
| 11 | K  | -       | 147.11  | 1  |

gi|3599495|gb|AAD13347.1| surface glycoprotein Tc85-11[Trypanosoma cruzi]  
R.DSFVSPSLVSAGGVIAAFAEGR.I  
P(pep)=2.96E-10

M+H=2137.092529  
Xcorr=3.49

DeltaM=0.41533  
DCn=0.51

z=2

#6709-6709 NL: 3.43E1

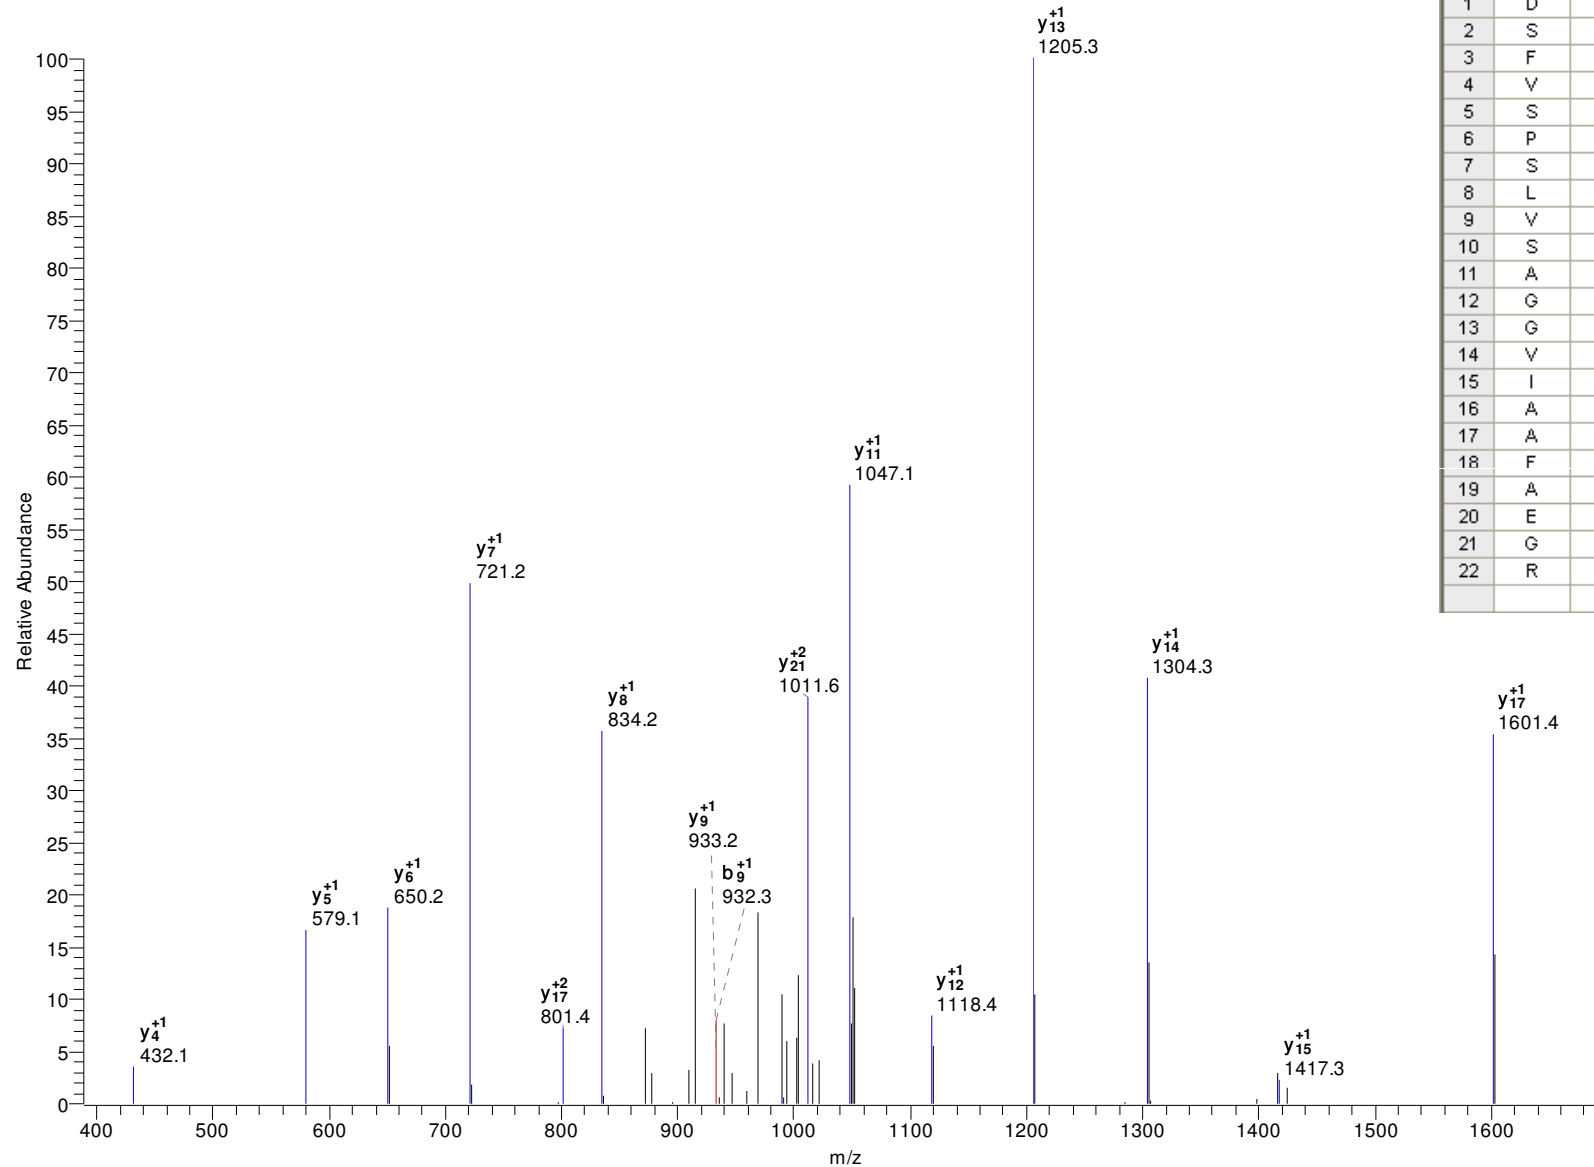

|    | AA | B       | Y       |    |
|----|----|---------|---------|----|
| 1  | D  | 116.03  | -       | 22 |
| 2  | S  | 203.07  | 2022.07 | 21 |
| 3  | F  | 350.13  | 1935.03 | 20 |
| 4  | V  | 449.20  | 1787.97 | 19 |
| 5  | S  | 536.24  | 1688.90 | 18 |
| 6  | P  | 633.29  | 1601.86 | 17 |
| 7  | S  | 720.32  | 1504.81 | 16 |
| 8  | L  | 833.40  | 1417.78 | 15 |
| 9  | V  | 932.47  | 1304.70 | 14 |
| 10 | S  | 1019.50 | 1205.63 | 13 |
| 11 | A  | 1090.54 | 1118.60 | 12 |
| 12 | G  | 1147.56 | 1047.56 | 11 |
| 13 | G  | 1204.58 | 990.54  | 10 |
| 14 | V  | 1303.65 | 933.52  | 9  |
| 15 | I  | 1416.74 | 834.45  | 8  |
| 16 | A  | 1487.77 | 721.36  | 7  |
| 17 | A  | 1558.81 | 650.33  | 6  |
| 18 | F  | 1705.88 | 579.29  | 5  |
| 19 | A  | 1776.92 | 432.22  | 4  |
| 20 | E  | 1905.96 | 361.18  | 3  |
| 21 | G  | 1962.98 | 232.14  | 2  |
| 22 | R  | -       | 175.12  | 1  |

gi|70887017|gb|EAN99782.1| t-complex protein 1, eta subunit, putative [Trypanosoma cruzi]

K.TLQELCVFPDPNSEQGR.K

M+H=1989.933472

DeltaM=0.74968

z=2

P(pep)=3.76E-07

Xcorr=3.42

DCn=0.37

#4307-4307 NL: 6.84E2

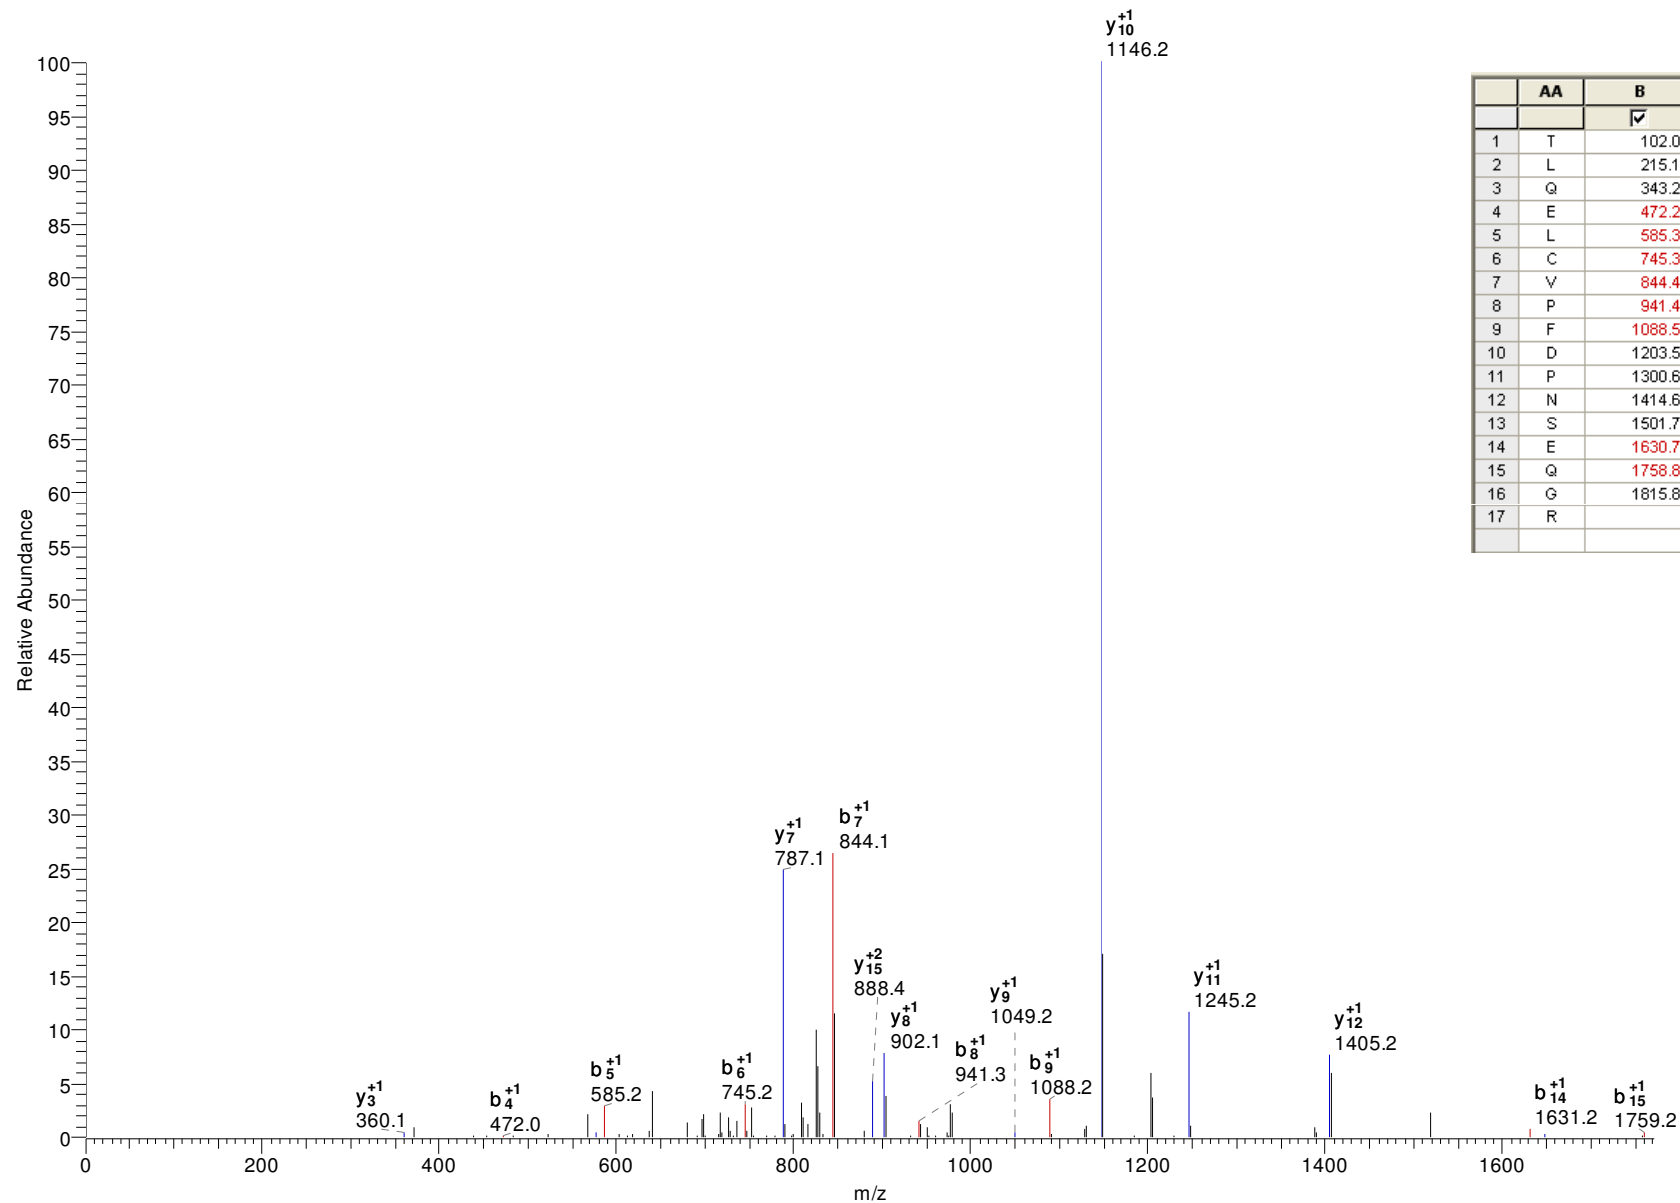

|    | AA | B       | Y       |    |
|----|----|---------|---------|----|
|    |    | ✓       | ✓       |    |
| 1  | T  | 102.05  | -       | 17 |
| 2  | L  | 215.14  | 1888.89 | 16 |
| 3  | Q  | 343.20  | 1775.80 | 15 |
| 4  | E  | 472.24  | 1647.74 | 14 |
| 5  | L  | 585.32  | 1518.70 | 13 |
| 6  | C  | 745.35  | 1405.62 | 12 |
| 7  | V  | 844.42  | 1245.59 | 11 |
| 8  | P  | 941.48  | 1146.52 | 10 |
| 9  | F  | 1088.54 | 1049.46 | 9  |
| 10 | D  | 1203.57 | 902.40  | 8  |
| 11 | P  | 1300.62 | 787.37  | 7  |
| 12 | N  | 1414.67 | 690.32  | 6  |
| 13 | S  | 1501.70 | 576.27  | 5  |
| 14 | E  | 1630.74 | 489.24  | 4  |
| 15 | Q  | 1758.80 | 360.20  | 3  |
| 16 | G  | 1815.82 | 232.14  | 2  |
| 17 | R  | -       | 175.12  | 1  |

gi|61207176|gb|AAx40321.1| actin [Trypanosoma cruzi]  
 R.TTGIVLDAGDGVTHTVPIYEGYSLPHAIR.R  
 z=3 P(pep)=4.56E-11 Xcorr=3.41

M+H=3052.57373 DeltaM=1.28965  
 DCn=0.50

#4755-4755 NL: 2.24E1

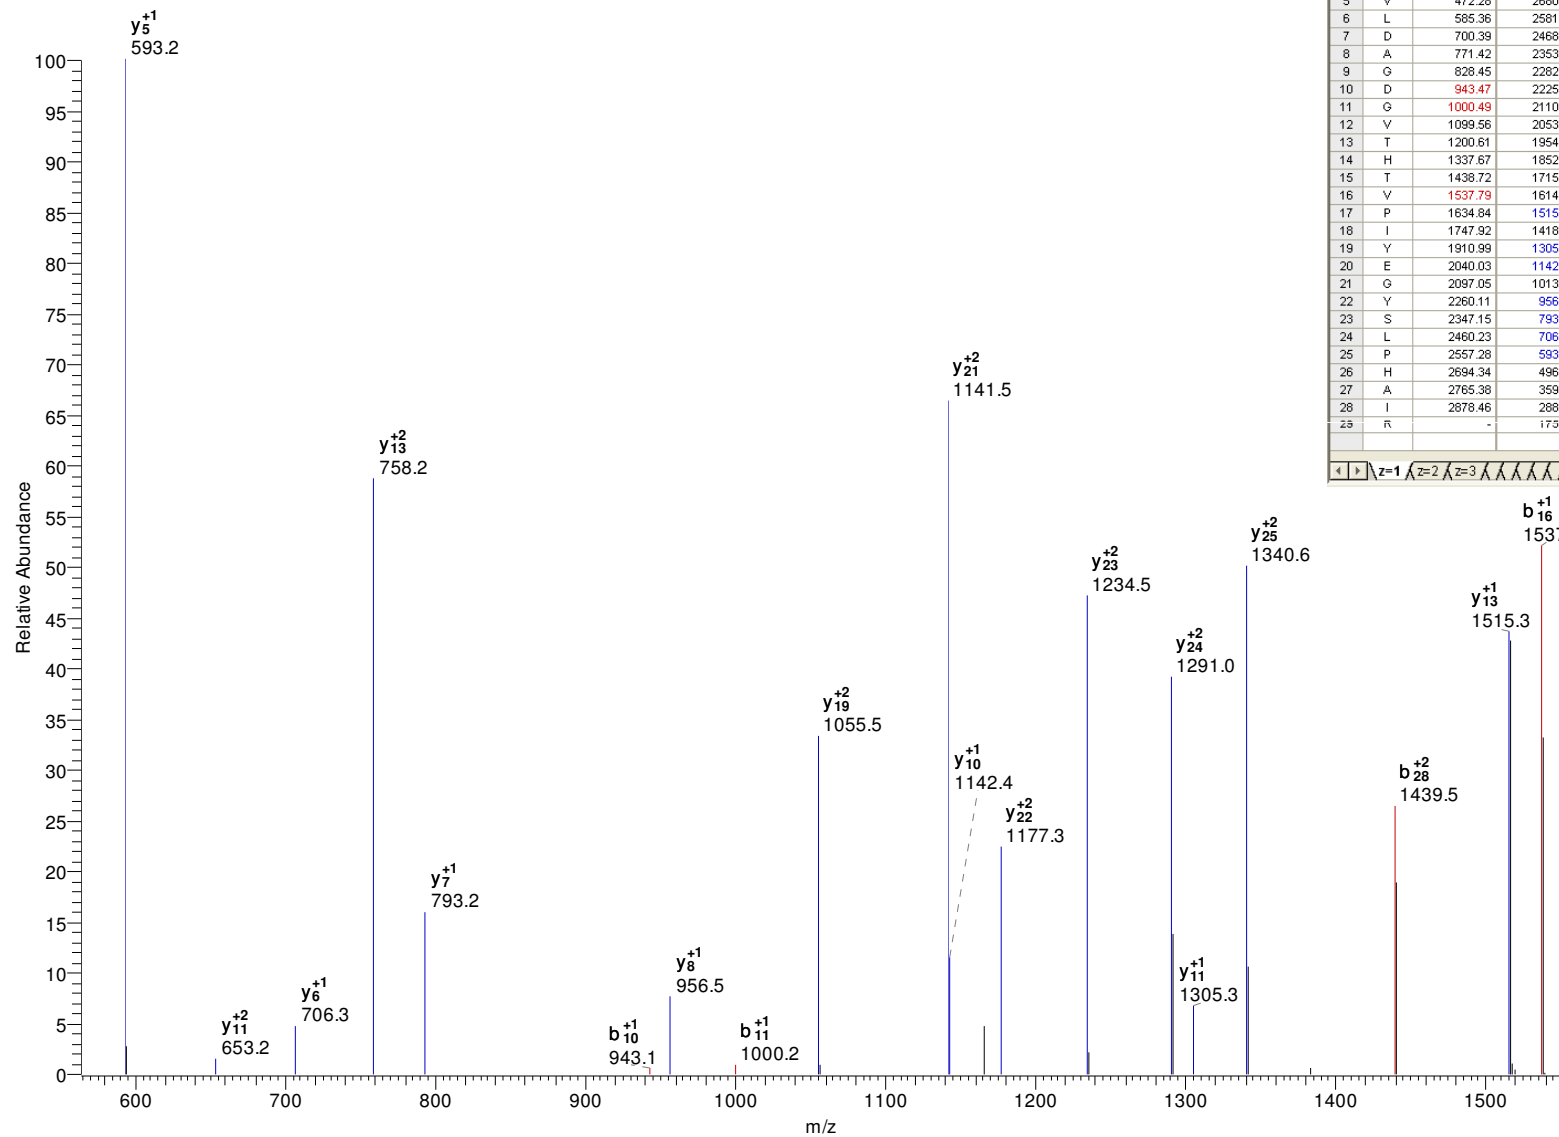

|    | AA | B       | Y       |    |
|----|----|---------|---------|----|
| 1  | T  | 102.05  | -       | 29 |
| 2  | T  | 203.10  | 2951.53 | 28 |
| 3  | G  | 260.12  | 2850.48 | 27 |
| 4  | I  | 373.21  | 2793.46 | 26 |
| 5  | V  | 472.28  | 2680.37 | 25 |
| 6  | L  | 585.36  | 2581.30 | 24 |
| 7  | D  | 700.39  | 2468.22 | 23 |
| 8  | A  | 771.42  | 2353.19 | 22 |
| 9  | G  | 828.45  | 2282.16 | 21 |
| 10 | D  | 943.47  | 2225.13 | 20 |
| 11 | G  | 1000.49 | 2110.11 | 19 |
| 12 | V  | 1099.56 | 2053.09 | 18 |
| 13 | T  | 1200.61 | 1954.02 | 17 |
| 14 | H  | 1337.67 | 1852.97 | 16 |
| 15 | T  | 1438.72 | 1715.91 | 15 |
| 16 | V  | 1537.79 | 1614.86 | 14 |
| 17 | P  | 1634.84 | 1515.80 | 13 |
| 18 | I  | 1747.92 | 1418.74 | 12 |
| 19 | Y  | 1910.99 | 1305.66 | 11 |
| 20 | E  | 2040.03 | 1142.60 | 10 |
| 21 | G  | 2097.05 | 1013.55 | 9  |
| 22 | Y  | 2260.11 | 956.53  | 8  |
| 23 | S  | 2347.15 | 793.47  | 7  |
| 24 | L  | 2460.23 | 706.44  | 6  |
| 25 | P  | 2557.28 | 593.35  | 5  |
| 26 | H  | 2694.34 | 496.30  | 4  |
| 27 | A  | 2765.38 | 359.24  | 3  |
| 28 | I  | 2878.46 | 268.20  | 2  |
| 29 | R  | -       | 173.12  | 1  |

|    | AA | B       | Y       |    |
|----|----|---------|---------|----|
| 1  | T  | 51.53   | -       | 29 |
| 2  | T  | 102.05  | 1476.27 | 28 |
| 3  | G  | 130.57  | 1425.74 | 27 |
| 4  | I  | 187.11  | 1397.23 | 26 |
| 5  | V  | 236.64  | 1340.69 | 25 |
| 6  | L  | 293.18  | 1291.16 | 24 |
| 7  | D  | 350.70  | 1234.61 | 23 |
| 8  | A  | 386.22  | 1177.10 | 22 |
| 9  | G  | 414.73  | 1141.58 | 21 |
| 10 | D  | 472.24  | 1113.07 | 20 |
| 11 | G  | 500.75  | 1055.56 | 19 |
| 12 | V  | 550.29  | 1027.05 | 18 |
| 13 | T  | 600.81  | 977.51  | 17 |
| 14 | H  | 669.34  | 926.99  | 16 |
| 15 | T  | 719.86  | 858.46  | 15 |
| 16 | V  | 769.40  | 807.94  | 14 |
| 17 | P  | 817.92  | 758.40  | 13 |
| 18 | I  | 874.46  | 709.87  | 12 |
| 19 | Y  | 956.00  | 653.33  | 11 |
| 20 | E  | 1020.52 | 571.80  | 10 |
| 21 | G  | 1049.03 | 507.28  | 9  |
| 22 | Y  | 1130.56 | 478.77  | 8  |
| 23 | S  | 1174.08 | 397.24  | 7  |
| 24 | L  | 1230.62 | 353.72  | 6  |
| 25 | P  | 1279.14 | 297.18  | 5  |
| 26 | H  | 1347.67 | 248.65  | 4  |
| 27 | A  | 1383.19 | 180.12  | 3  |
| 28 | I  | 1439.73 | 144.61  | 2  |
| 29 | R  | -       | 86.06   | 1  |

z=1 z=2 z=3

z=1 z=2 z=3

gi|70876182|gb|EAN89660.1| vacuolar ATP synthase, putative [Trypanosoma cruzi]

K.SGVGVAHLGILHSER.I

M+H=1531.833984

DeltaM=0.10515

z=2

P(pep)=1.75E-06

Xcorr=3.37

DCn=0.57

#3056-3056 NL: 7.79E1

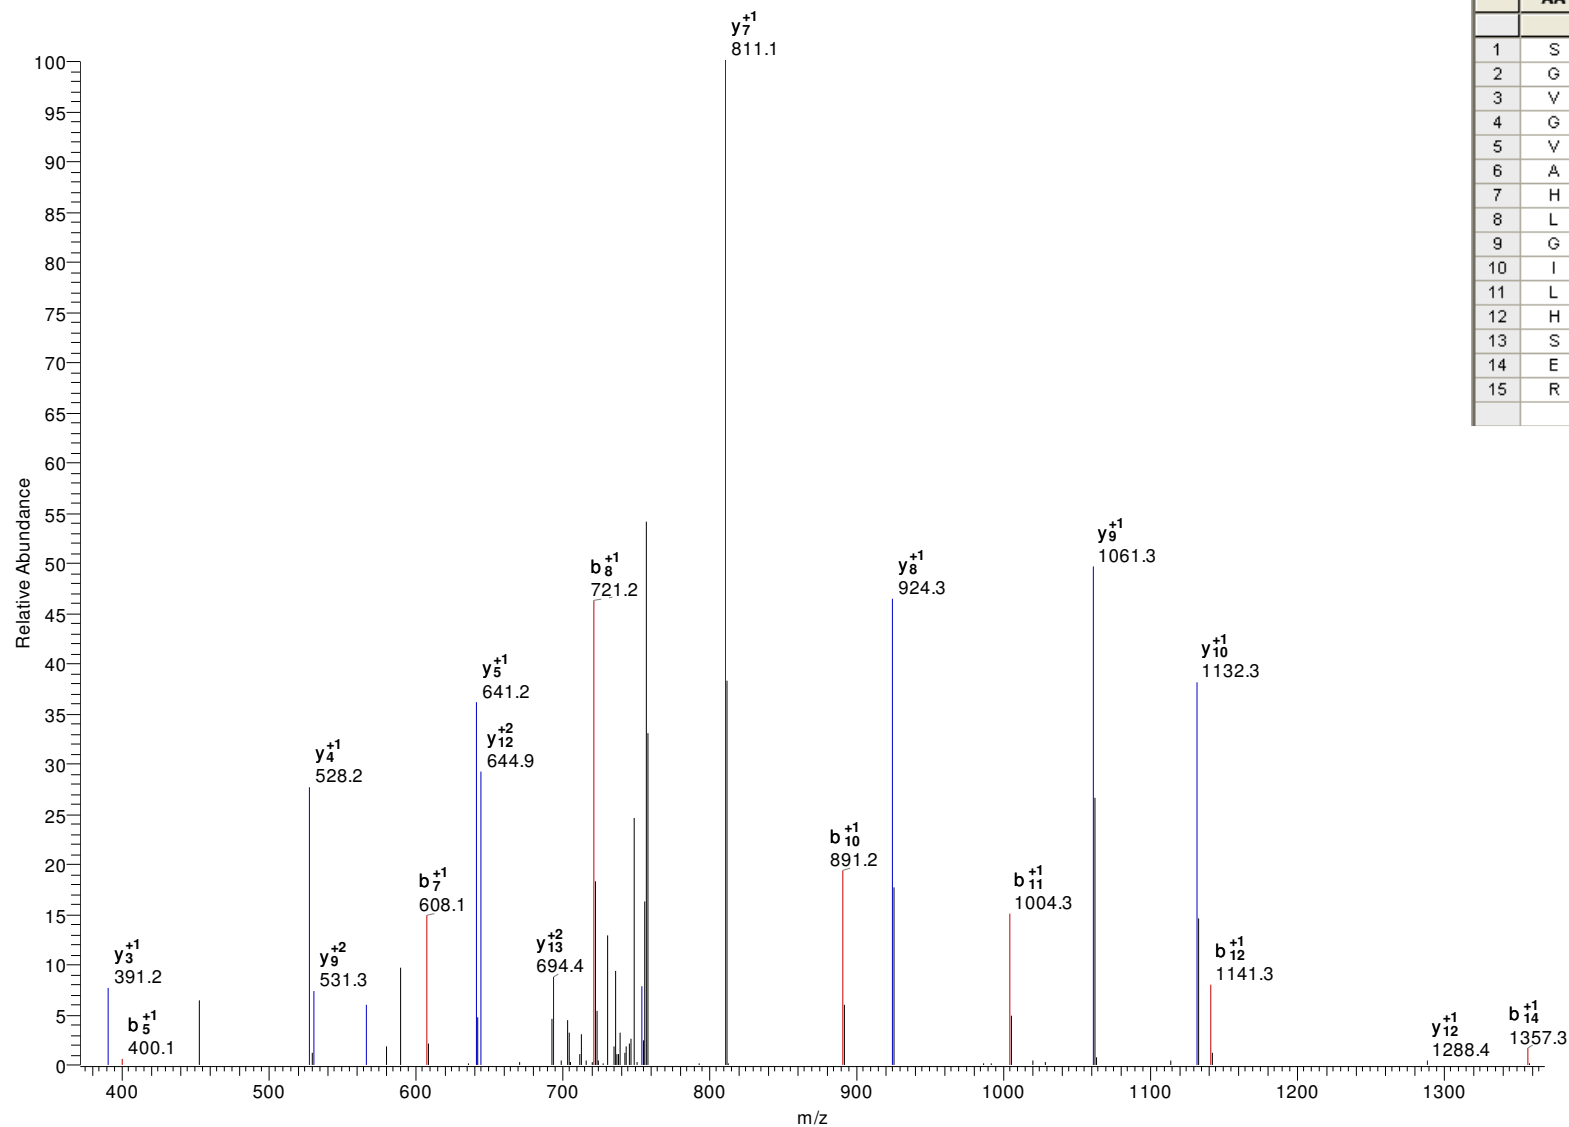

|    | AA | B                                   | Y                                   |    |
|----|----|-------------------------------------|-------------------------------------|----|
|    |    | <input checked="" type="checkbox"/> | <input checked="" type="checkbox"/> |    |
| 1  | S  | 88.04                               | -                                   | 15 |
| 2  | G  | 145.06                              | 1444.80                             | 14 |
| 3  | V  | 244.13                              | 1387.78                             | 13 |
| 4  | G  | 301.15                              | 1288.71                             | 12 |
| 5  | V  | 400.22                              | 1231.69                             | 11 |
| 6  | A  | 471.26                              | 1132.62                             | 10 |
| 7  | H  | 608.32                              | 1061.59                             | 9  |
| 8  | L  | 721.40                              | 924.53                              | 8  |
| 9  | G  | 778.42                              | 811.44                              | 7  |
| 10 | I  | 891.50                              | 754.42                              | 6  |
| 11 | L  | 1004.59                             | 641.34                              | 5  |
| 12 | H  | 1141.65                             | 528.25                              | 4  |
| 13 | S  | 1228.68                             | 391.19                              | 3  |
| 14 | E  | 1357.72                             | 304.16                              | 2  |
| 15 | R  | -                                   | 175.12                              | 1  |

gi|70879190|gb|EAN92384.1| ADG1-like protein, putative [Trypanosoma cruzi]

R.RLELQNVEQTR.S

M+H=1385.749512

DeltaM=0.63982

z=2

P(pep)=7.94E-05

Xcorr=3.37

DCn=0.46

#2704-2704 NL: 1.72E2

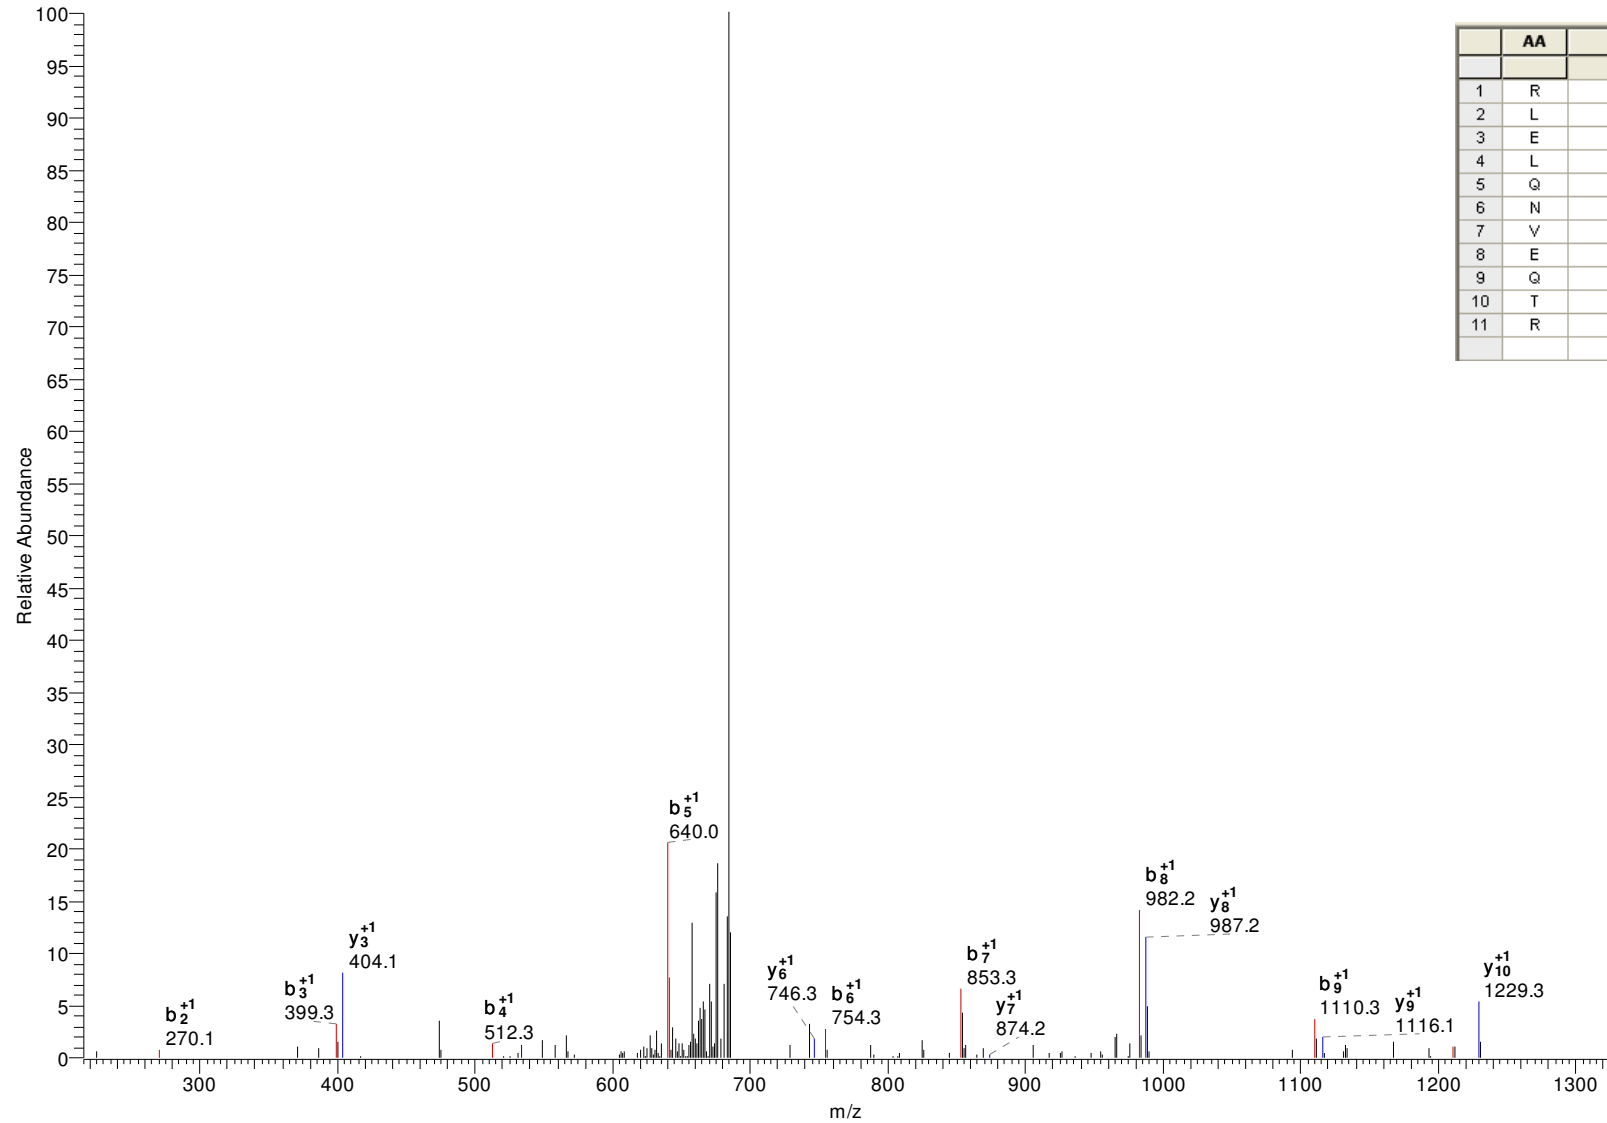

|    | AA | B                                   | Y                                   |    |
|----|----|-------------------------------------|-------------------------------------|----|
|    |    | <input checked="" type="checkbox"/> | <input checked="" type="checkbox"/> |    |
| 1  | R  | 157.11                              | -                                   | 11 |
| 2  | L  | 270.19                              | 1229.65                             | 10 |
| 3  | E  | 399.24                              | 1116.56                             | 9  |
| 4  | L  | 512.32                              | 987.52                              | 8  |
| 5  | Q  | 640.38                              | 874.44                              | 7  |
| 6  | N  | 754.42                              | 746.38                              | 6  |
| 7  | V  | 853.49                              | 632.34                              | 5  |
| 8  | E  | 982.53                              | 533.27                              | 4  |
| 9  | Q  | 1110.59                             | 404.23                              | 3  |
| 10 | T  | 1211.64                             | 276.17                              | 2  |
| 11 | R  | -                                   | 175.12                              | 1  |



gi|70868637|gb|EAN83435.1| hypothetical protein, conserved [Trypanosoma cruzi]  
 R.LCQLYELLR.D M+H=1207.650391 DeltaM=0.40691 z=2  
 P(pep)=4.13E-05 Xcorr=3.36 DCn=0.09

#4964-4964 NL: 1.32E2

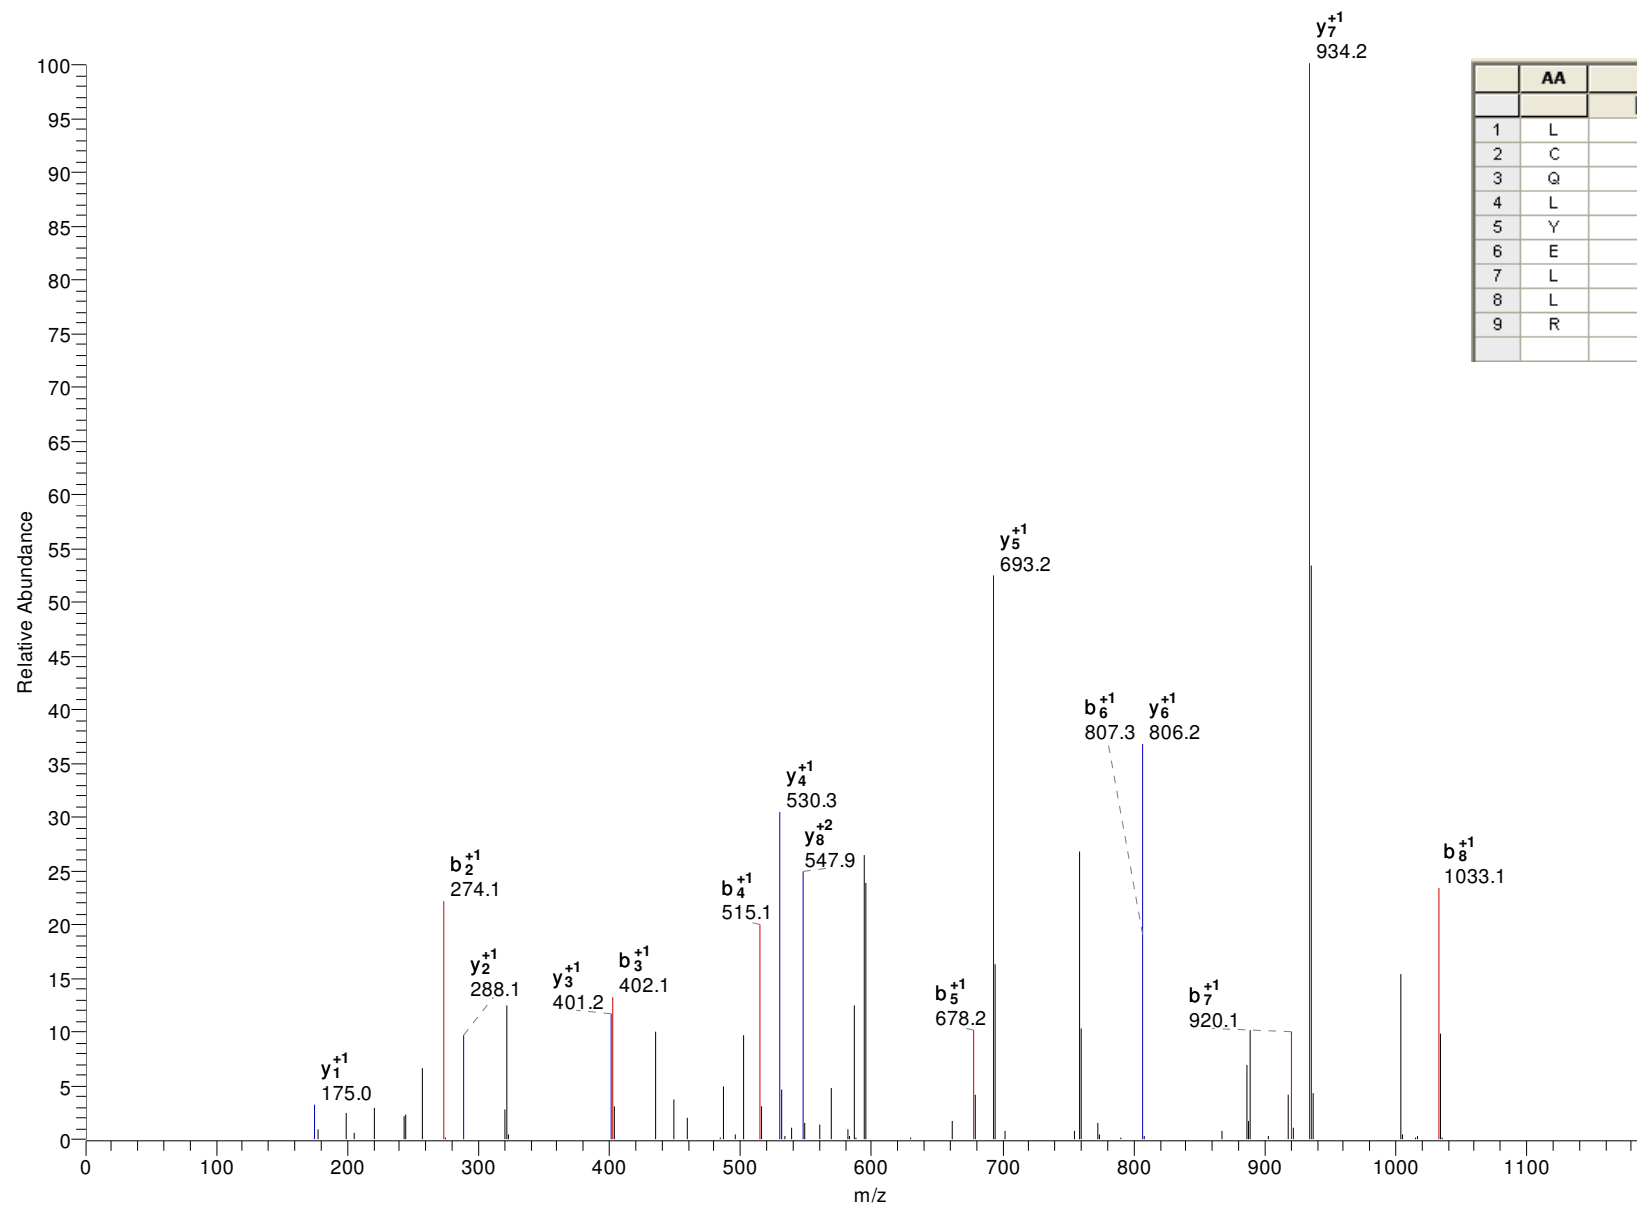

|   | AA | B       | Y       |   |
|---|----|---------|---------|---|
|   |    | ✓       | ✓       |   |
| 1 | L  | 114.09  | -       | 9 |
| 2 | C  | 274.12  | 1094.57 | 8 |
| 3 | Q  | 402.18  | 934.54  | 7 |
| 4 | L  | 515.26  | 806.48  | 6 |
| 5 | Y  | 678.33  | 693.39  | 5 |
| 6 | E  | 807.37  | 530.33  | 4 |
| 7 | L  | 920.45  | 401.29  | 3 |
| 8 | L  | 1033.54 | 288.20  | 2 |
| 9 | R  | -       | 175.12  | 1 |

gi|70885133|gb|EAN97964.1| hypothetical protein, conserved [Trypanosoma cruzi]

K.TLLTVLNGVGSAAGR.L

M+H=1428.816895

DeltaM=1.58391

z=2

P(pep)=4.38E-09

Xcorr=3.36

DCn=0.46

#4981-4981 NL: 5.14E1

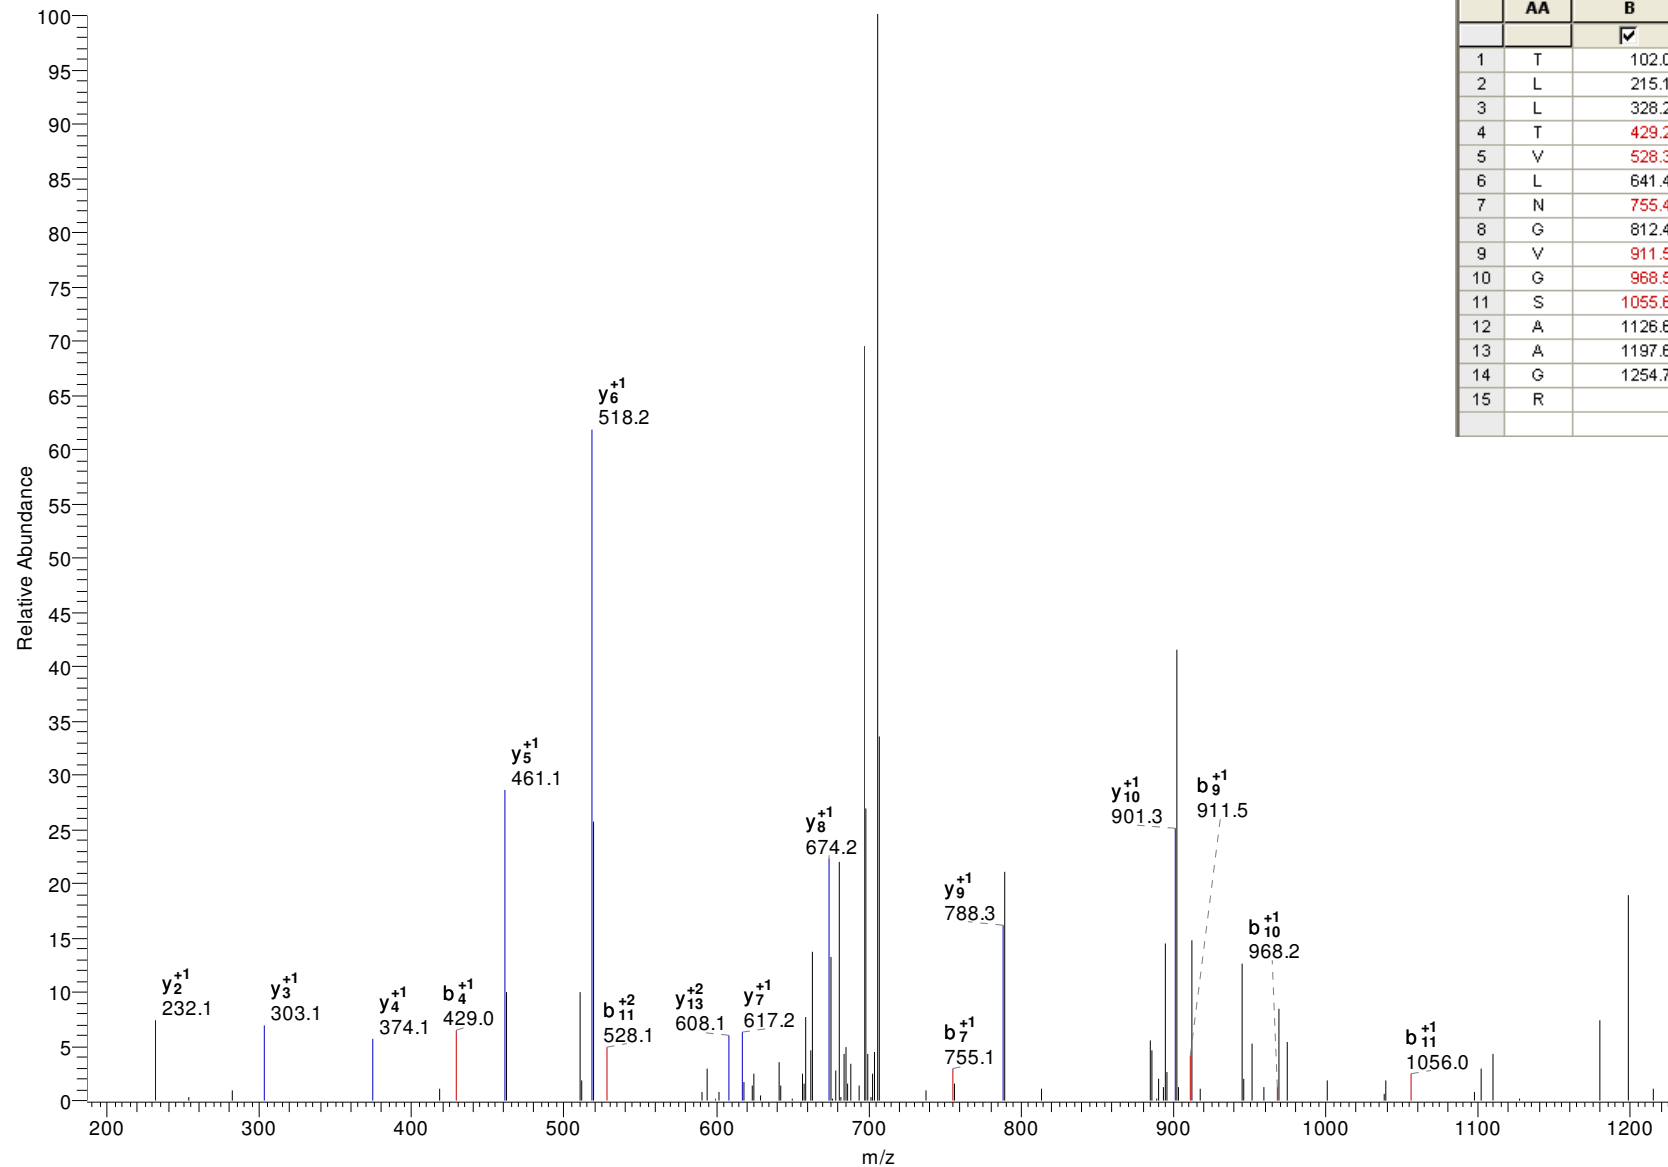

|    | AA | B       | Y       |    |
|----|----|---------|---------|----|
|    |    | ✓       | ✓       |    |
| 1  | T  | 102.05  | -       | 15 |
| 2  | L  | 215.14  | 1327.77 | 14 |
| 3  | L  | 328.22  | 1214.69 | 13 |
| 4  | T  | 429.27  | 1101.60 | 12 |
| 5  | V  | 528.34  | 1000.55 | 11 |
| 6  | L  | 641.42  | 901.49  | 10 |
| 7  | N  | 755.47  | 788.40  | 9  |
| 8  | G  | 812.49  | 674.36  | 8  |
| 9  | V  | 911.56  | 617.34  | 7  |
| 10 | G  | 968.58  | 518.27  | 6  |
| 11 | S  | 1055.61 | 461.25  | 5  |
| 12 | A  | 1126.65 | 374.21  | 4  |
| 13 | A  | 1197.68 | 303.18  | 3  |
| 14 | G  | 1254.71 | 232.14  | 2  |
| 15 | R  | -       | 175.12  | 1  |

gi|70877737|gb|EAN91053.1| L-threonine 3-dehydrogenase, putative [Trypanosoma cruzi]

K.DDTILNPSTVYGVTK.V

M+H=1622.827148

DeltaM=0.92290

z=2

P(pep)=0.000585515

Xcorr=3.35

DCn=0.44

#3916-3916 NL: 1.48E2

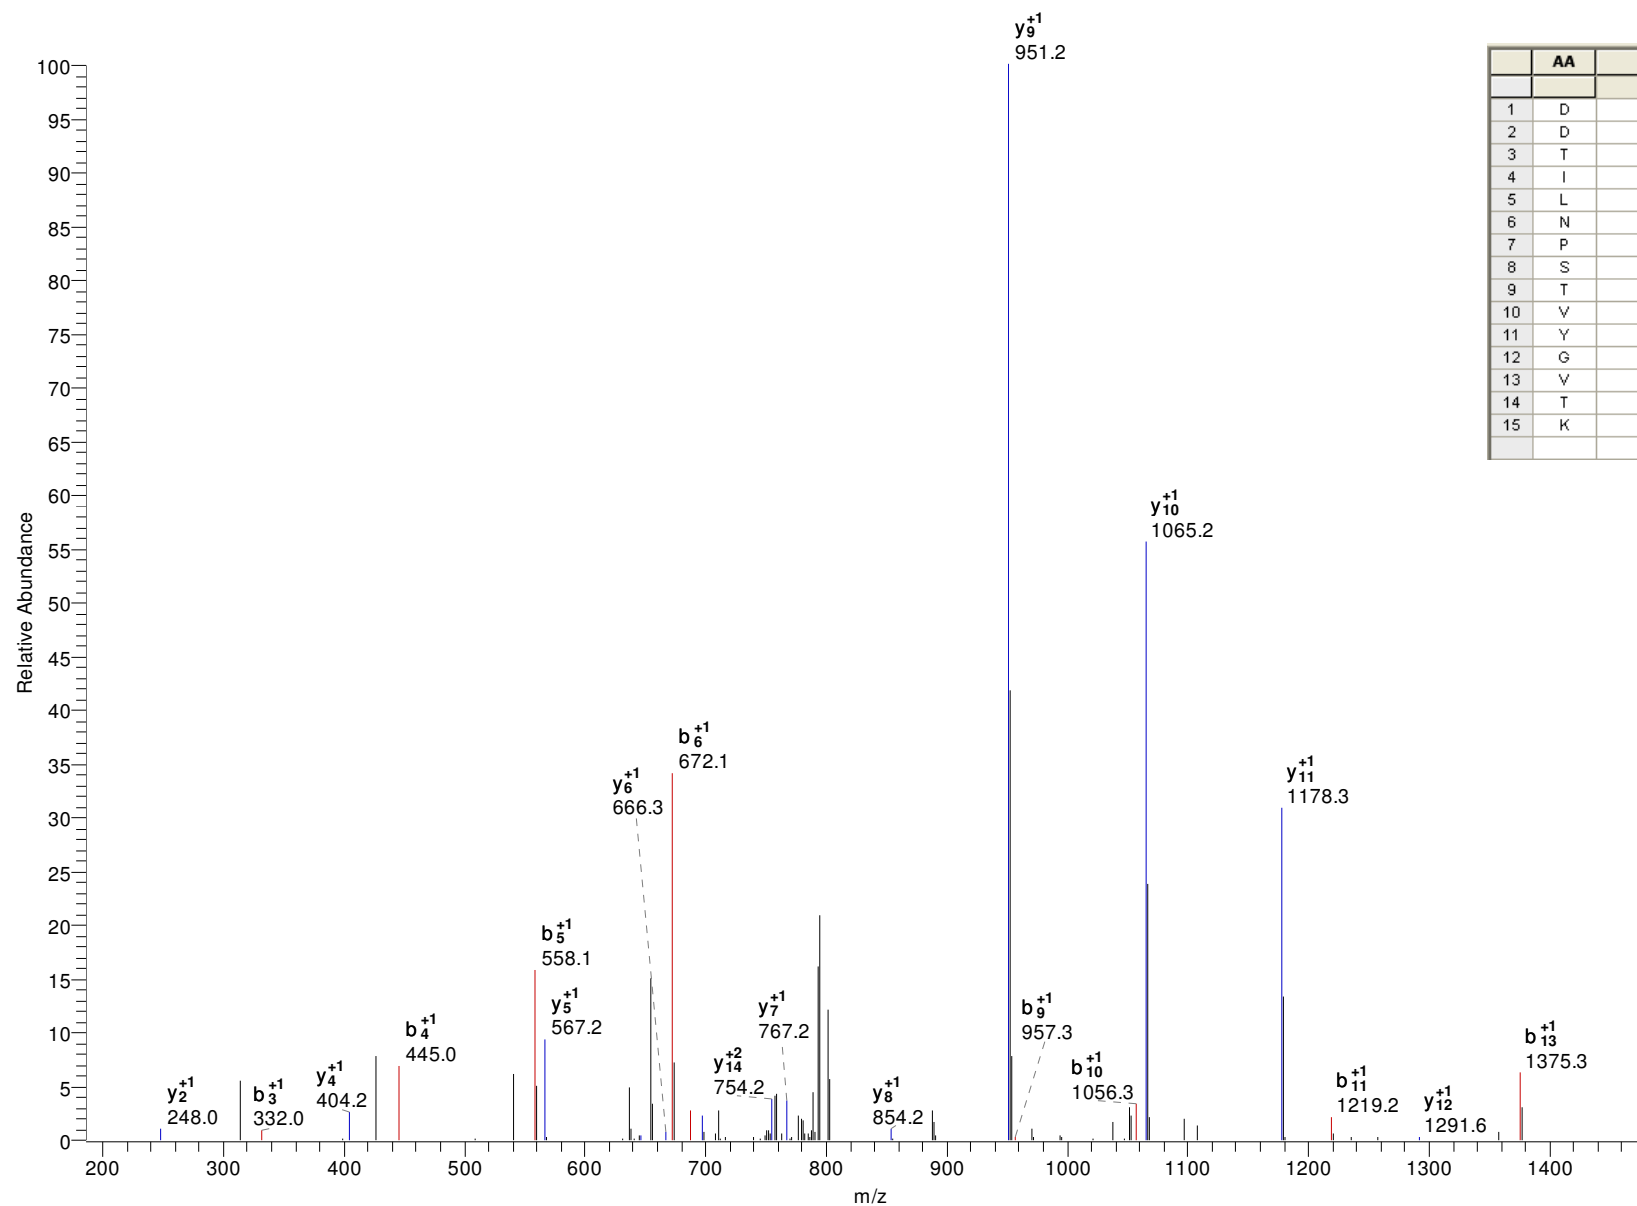

|    | AA | B       | Y       |    |
|----|----|---------|---------|----|
|    |    | ✓       | ✓       |    |
| 1  | D  | 116.03  | -       | 15 |
| 2  | D  | 231.06  | 1507.80 | 14 |
| 3  | T  | 332.11  | 1392.77 | 13 |
| 4  | I  | 445.19  | 1291.73 | 12 |
| 5  | L  | 558.28  | 1178.64 | 11 |
| 6  | N  | 672.32  | 1065.56 | 10 |
| 7  | P  | 769.37  | 951.51  | 9  |
| 8  | S  | 856.40  | 854.46  | 8  |
| 9  | T  | 957.45  | 767.43  | 7  |
| 10 | V  | 1056.52 | 666.38  | 6  |
| 11 | Y  | 1219.58 | 567.31  | 5  |
| 12 | G  | 1276.61 | 404.25  | 4  |
| 13 | V  | 1375.67 | 347.23  | 3  |
| 14 | T  | 1476.72 | 248.16  | 2  |
| 15 | K  | -       | 147.11  | 1  |

gi|70870752|gb|EAN85029.1| hypothetical protein, conserved [Trypanosoma cruzi]  
R.TVEEFWSTINSLPK.L M+H=1650.837402 DeltaM=1.17534 z=2  
P(pep)=6.30E-07 Xcorr=3.35 DCn=0.56

#5663-5663 NL: 2.13E1

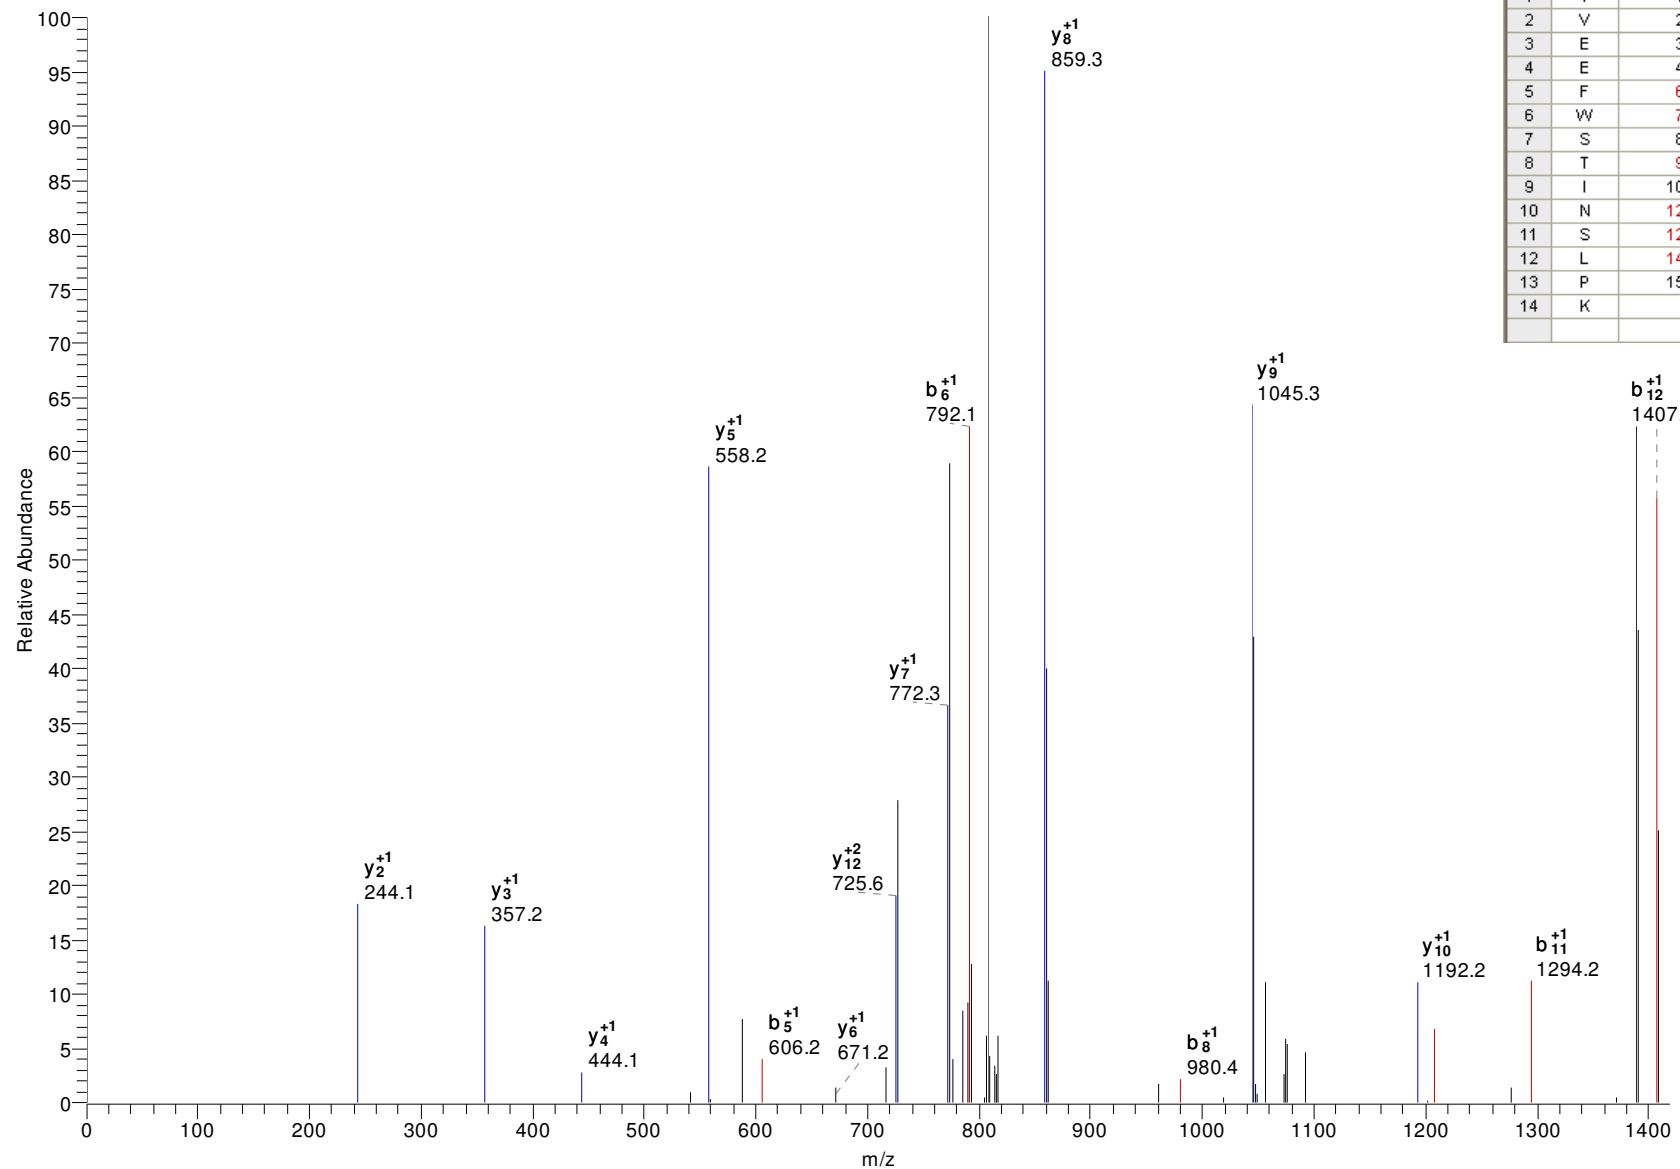

|    | AA | B       | Y       |    |
|----|----|---------|---------|----|
|    |    | ✓       | ✓       |    |
| 1  | T  | 102.05  | -       | 14 |
| 2  | V  | 201.12  | 1549.79 | 13 |
| 3  | E  | 330.17  | 1450.72 | 12 |
| 4  | E  | 459.21  | 1321.68 | 11 |
| 5  | F  | 606.28  | 1192.64 | 10 |
| 6  | W  | 792.36  | 1045.57 | 9  |
| 7  | S  | 879.39  | 859.49  | 8  |
| 8  | T  | 980.44  | 772.46  | 7  |
| 9  | I  | 1093.52 | 671.41  | 6  |
| 10 | N  | 1207.56 | 558.32  | 5  |
| 11 | S  | 1294.60 | 444.28  | 4  |
| 12 | L  | 1407.68 | 357.25  | 3  |
| 13 | P  | 1504.73 | 244.17  | 2  |
| 14 | K  | -       | 147.11  | 1  |

gi|70867170|gb|EAN82432.1| hypothetical protein, conserved [Trypanosoma cruzi]

K.FFEEVPDAWSNEK.N

M+H=1597.716919

DeltaM=1.22136

z=2

P(pep)=8.28E-06

Xcorr=3.33

DCn=0.54

#4039-4039 NL: 4.16E2

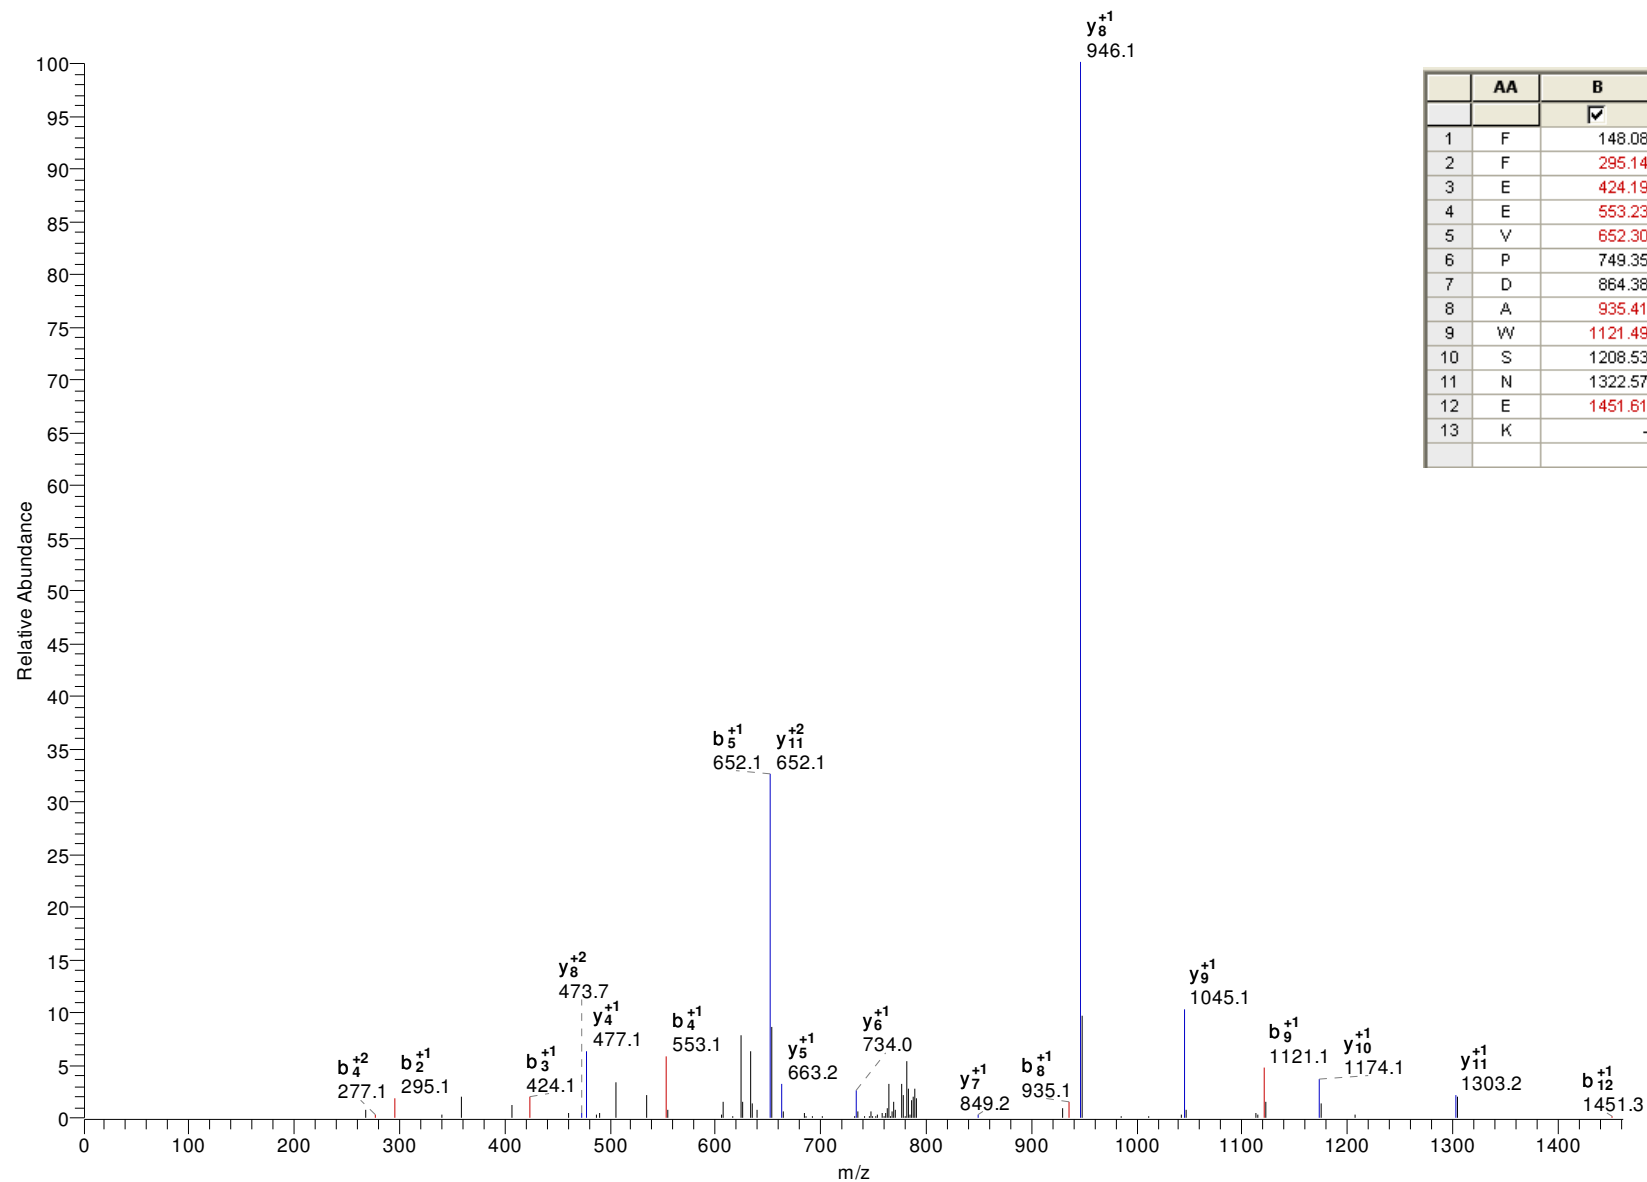

|    | AA | B                                   | Y                                   |    |
|----|----|-------------------------------------|-------------------------------------|----|
|    |    | <input checked="" type="checkbox"/> | <input checked="" type="checkbox"/> |    |
| 1  | F  | 148.08                              | -                                   | 13 |
| 2  | F  | 295.14                              | 1450.65                             | 12 |
| 3  | E  | 424.19                              | 1303.58                             | 11 |
| 4  | E  | 553.23                              | 1174.54                             | 10 |
| 5  | V  | 652.30                              | 1045.49                             | 9  |
| 6  | P  | 749.35                              | 946.43                              | 8  |
| 7  | D  | 864.38                              | 849.37                              | 7  |
| 8  | A  | 935.41                              | 734.35                              | 6  |
| 9  | W  | 1121.49                             | 663.31                              | 5  |
| 10 | S  | 1208.53                             | 477.23                              | 4  |
| 11 | N  | 1322.57                             | 390.20                              | 3  |
| 12 | E  | 1451.61                             | 276.16                              | 2  |
| 13 | K  | -                                   | 147.11                              | 1  |

gi|70886428|gb|EAN99210.1| proteasome regulatory non-ATPase subunit 6, putative [Trypanosoma cruzi]

K.DSPFLADEVLQR.R

M+H=1389.700928

DeltaM=0.90044

z=2

P(pep)=3.68E-07

Xcorr=3.31

DCn=0.41

#4177-4177 NL: 2.94E2

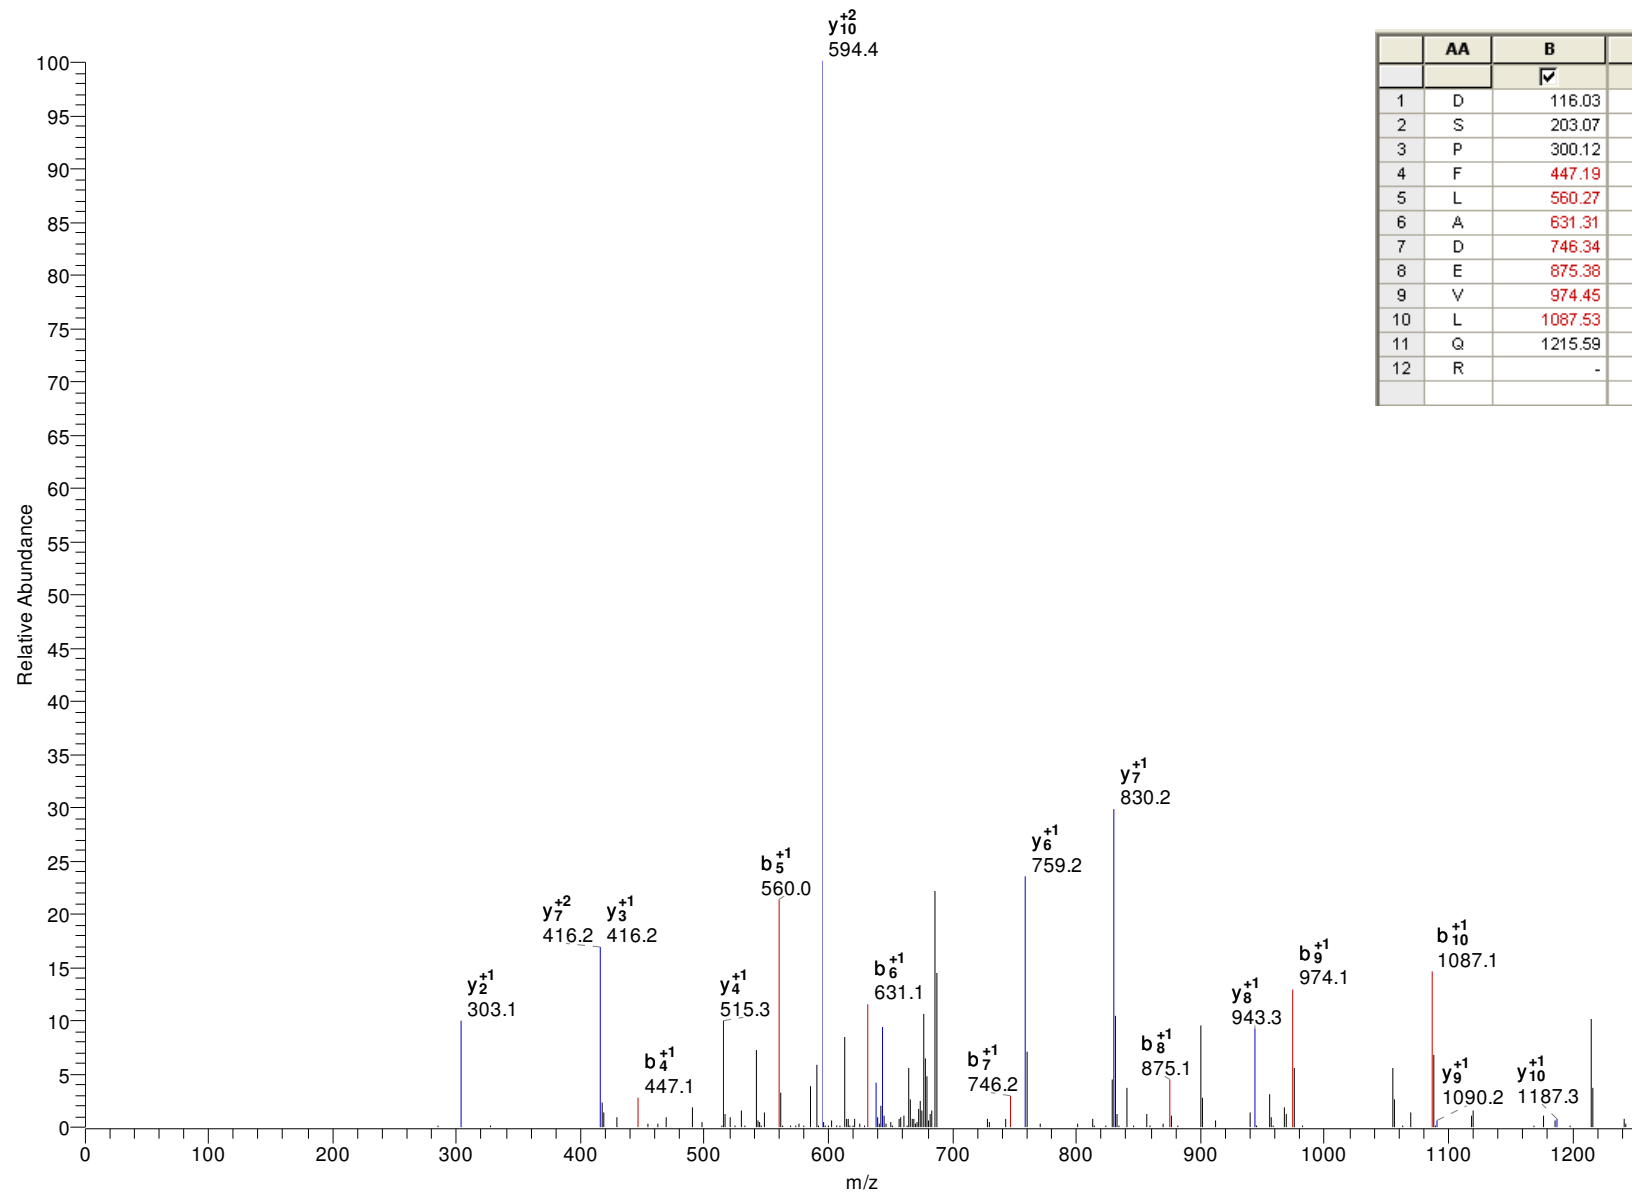

|    | AA | B       | Y       |    |
|----|----|---------|---------|----|
|    |    | ✓       | ✓       |    |
| 1  | D  | 116.03  | -       | 12 |
| 2  | S  | 203.07  | 1274.67 | 11 |
| 3  | P  | 300.12  | 1187.64 | 10 |
| 4  | F  | 447.19  | 1090.59 | 9  |
| 5  | L  | 560.27  | 943.52  | 8  |
| 6  | A  | 631.31  | 830.44  | 7  |
| 7  | D  | 746.34  | 759.40  | 6  |
| 8  | E  | 875.38  | 644.37  | 5  |
| 9  | V  | 974.45  | 515.33  | 4  |
| 10 | L  | 1087.53 | 416.26  | 3  |
| 11 | Q  | 1215.59 | 303.18  | 2  |
| 12 | R  | -       | 175.12  | 1  |

gi|70882458|gb|EAN95427.1| hypothetical protein, conserved [Trypanosoma cruzi]

R.SKLDVAVVEIEK.K

M+H=1301.731079

DeltaM=0.19475

z=2

P(pep)=1.86E-05

Xcorr=3.30

DCn=0.49

#4070-4070 NL: 6.62E1

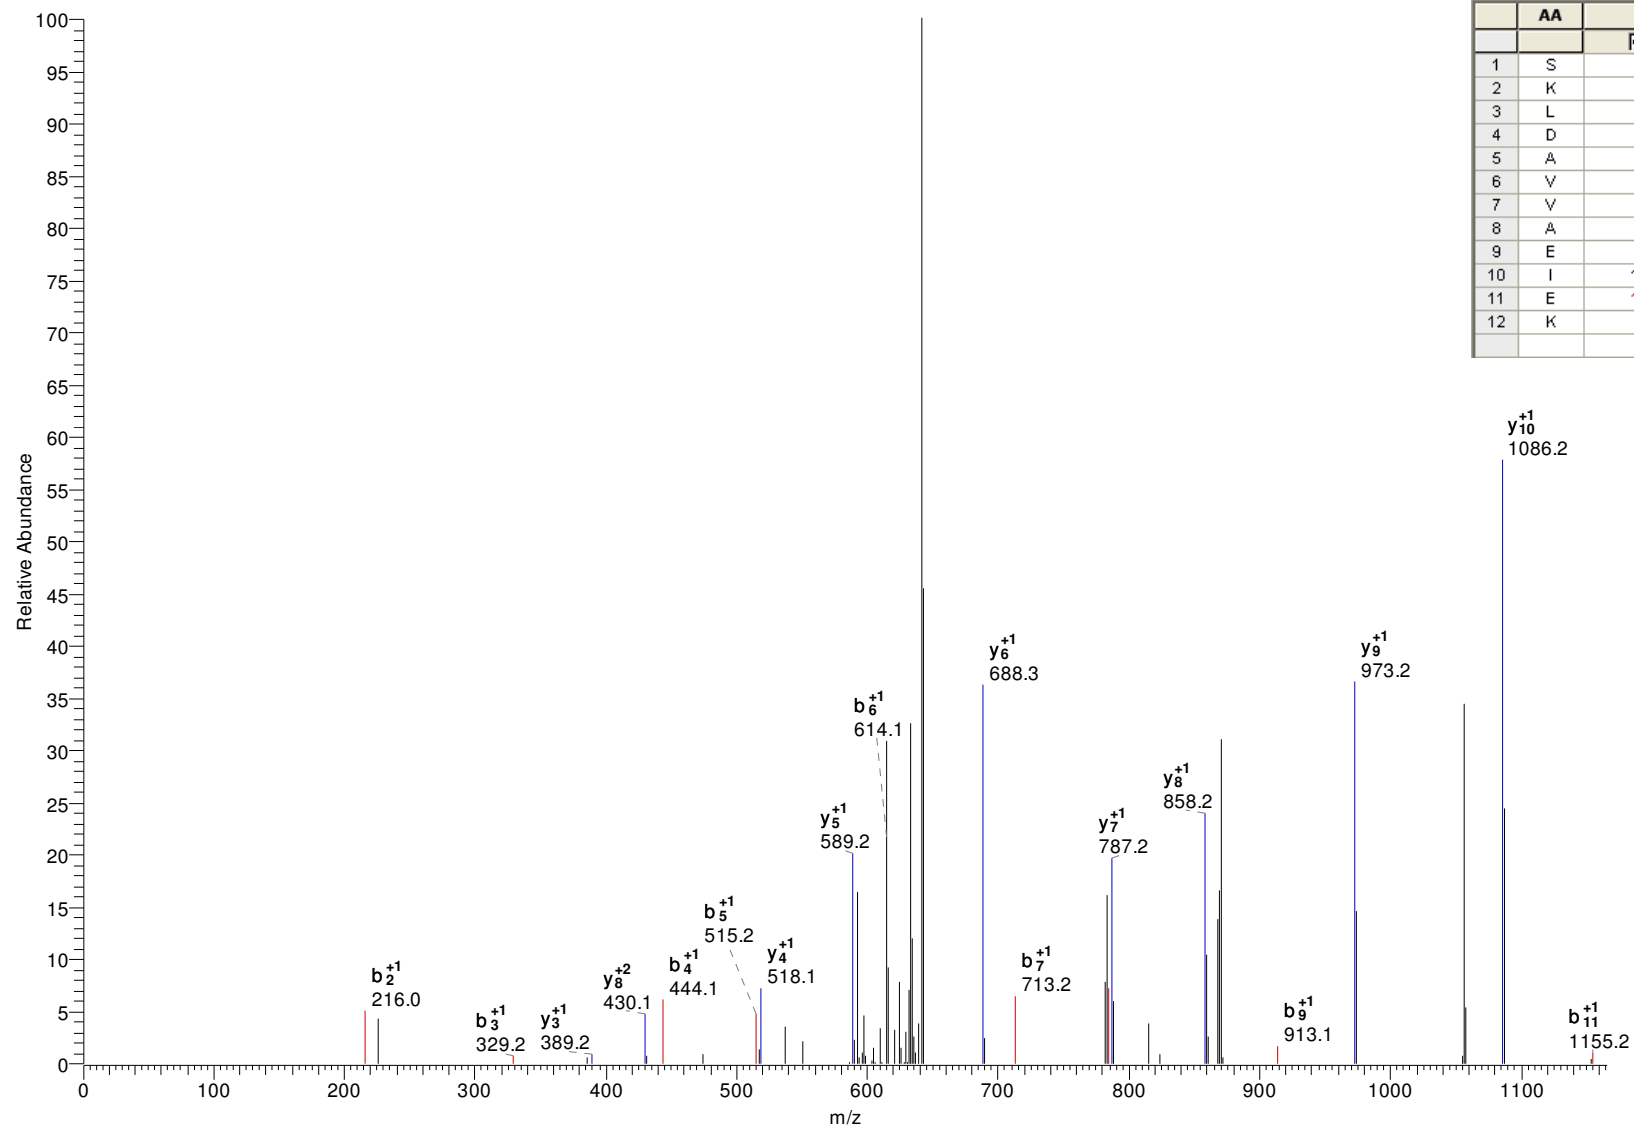

|    | AA | B       | Y       |    |
|----|----|---------|---------|----|
|    |    | ✓       | ✓       |    |
| 1  | S  | 88.04   | -       | 12 |
| 2  | K  | 216.13  | 1214.70 | 11 |
| 3  | L  | 329.22  | 1086.60 | 10 |
| 4  | D  | 444.25  | 973.52  | 9  |
| 5  | A  | 515.28  | 858.49  | 8  |
| 6  | V  | 614.35  | 787.46  | 7  |
| 7  | V  | 713.42  | 688.39  | 6  |
| 8  | A  | 784.46  | 589.32  | 5  |
| 9  | E  | 913.50  | 518.28  | 4  |
| 10 | I  | 1026.58 | 389.24  | 3  |
| 11 | E  | 1155.63 | 276.16  | 2  |
| 12 | K  | -       | 147.11  | 1  |

gi|124109205|gb|ABM91078.1| thiol transferase Tc52 [Trypanosoma cruzi]

K.ACTPDLTEGQDLLANYK.L

M+H=1908.900757

DeltaM=0.31169

z=2

P(pep)=5.68E-07

Xcorr=3.29

DCn=0.53

#4353-4353 NL: 5.79E1

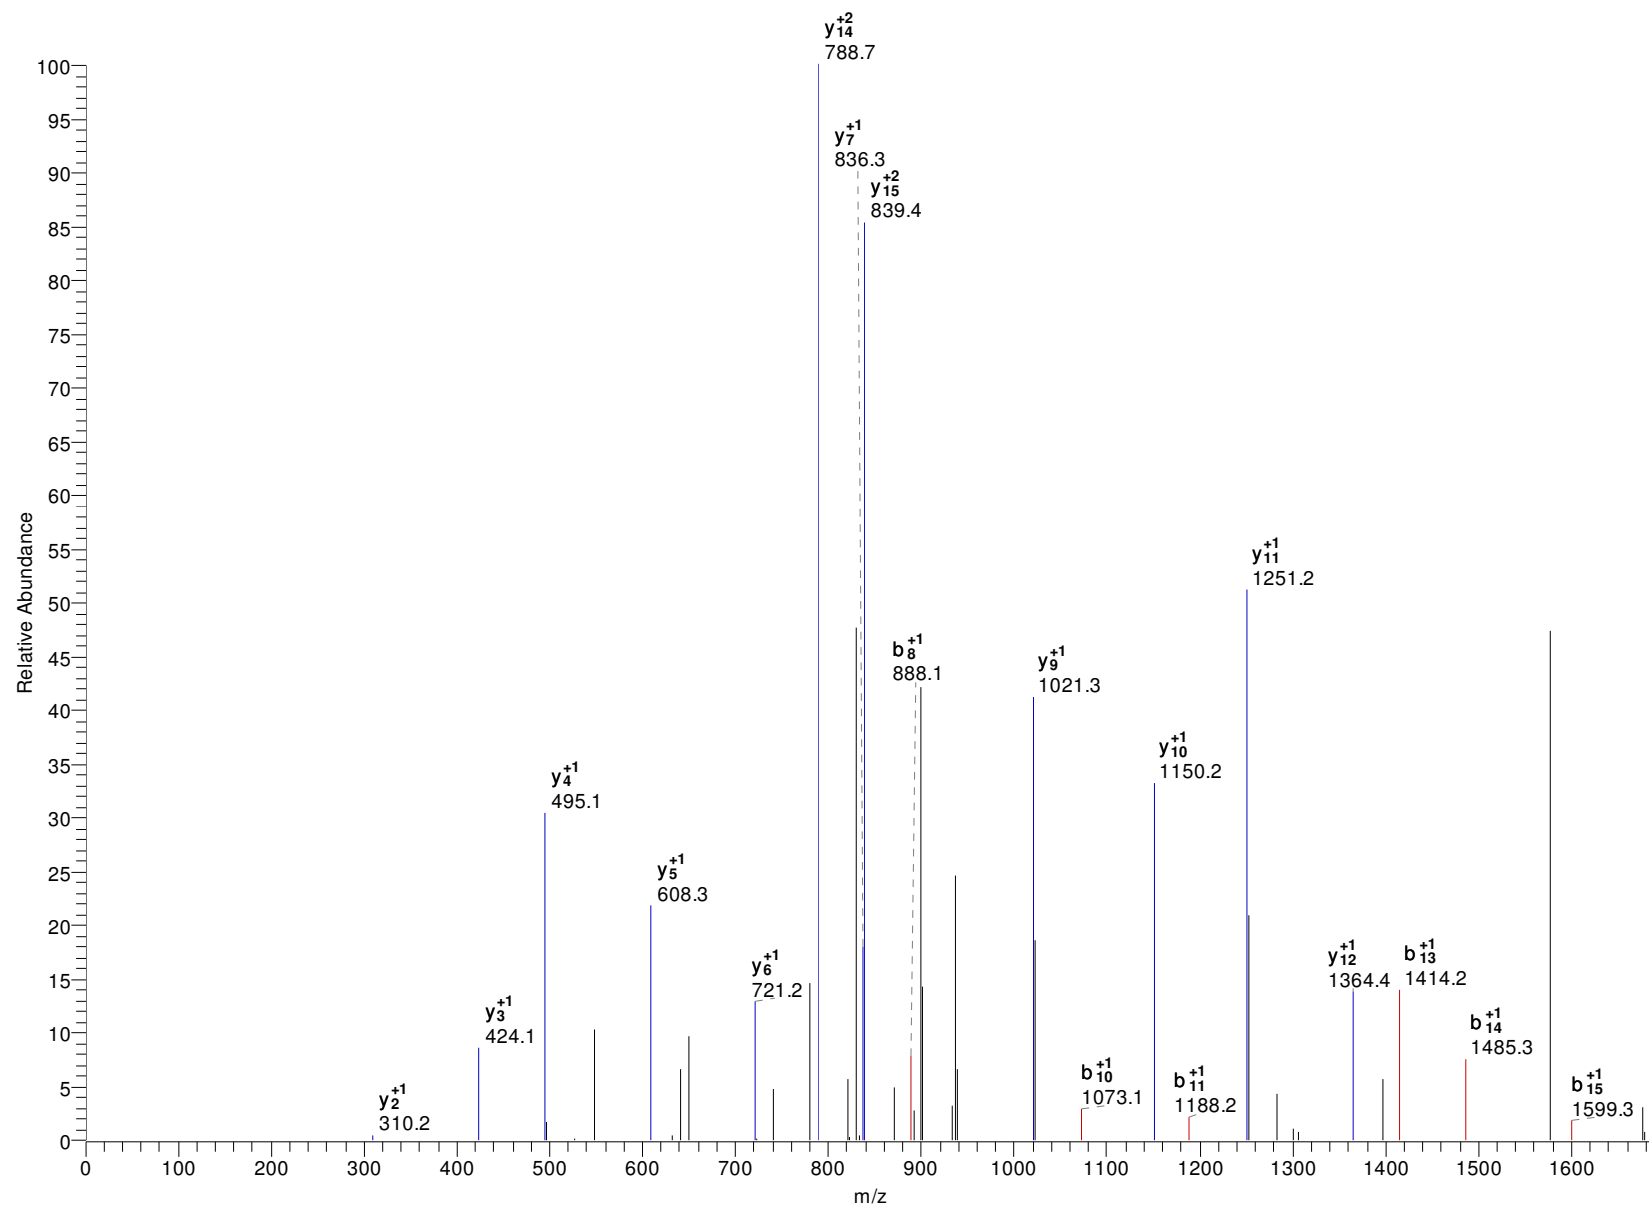



gi|70879737|gb|EAN92888.1| acyl-CoA dehydrogenase, putative [Trypanosoma cruzi]

K.ELFESLLEEASK.L

M+H=1394.704956

Xcorr=1.92571

z=2

P(pep)=9.87E-07

Xcorr=3.25

DCn=0.43

#5864-5864 NL: 4.72E1

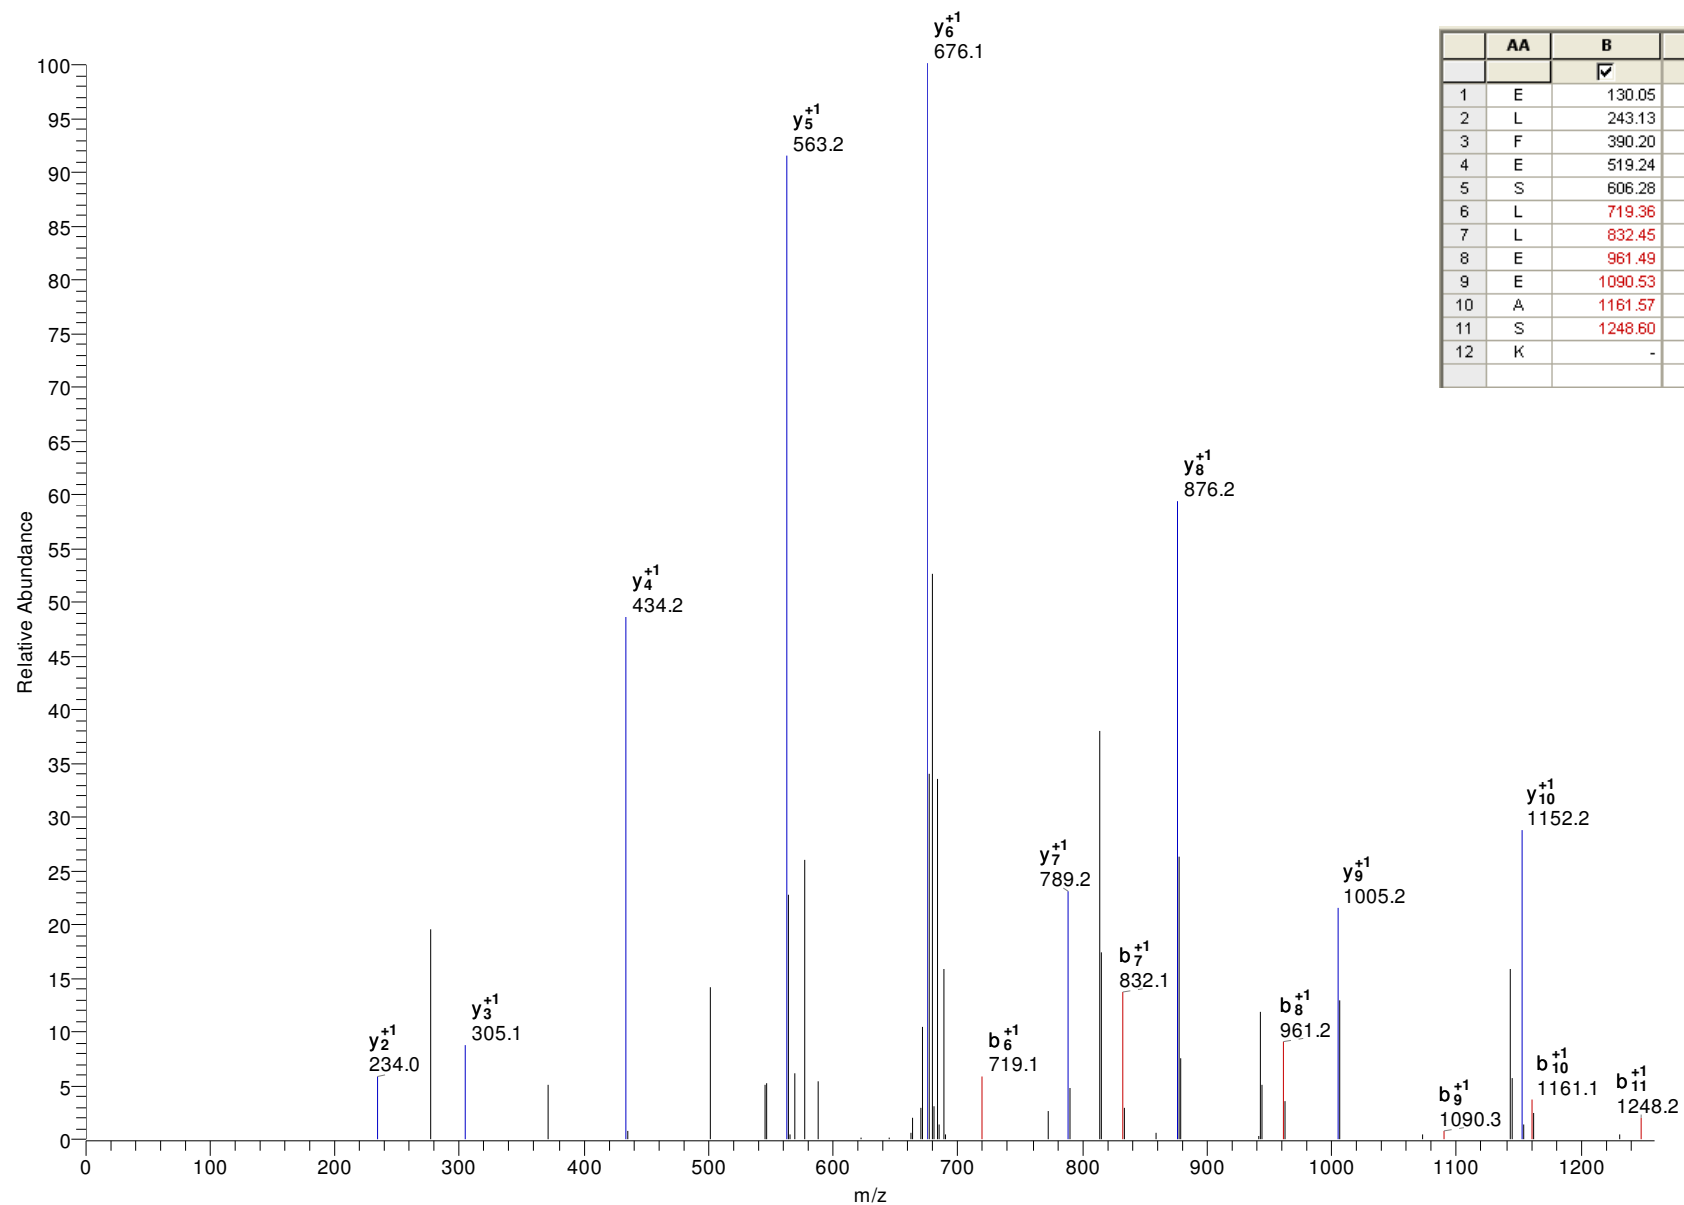

|    | AA | B                                   | Y                                   |    |
|----|----|-------------------------------------|-------------------------------------|----|
|    |    | <input checked="" type="checkbox"/> | <input checked="" type="checkbox"/> |    |
| 1  | E  | 130.05                              | -                                   | 12 |
| 2  | L  | 243.13                              | 1265.66                             | 11 |
| 3  | F  | 390.20                              | 1152.58                             | 10 |
| 4  | E  | 519.24                              | 1005.51                             | 9  |
| 5  | S  | 606.28                              | 876.47                              | 8  |
| 6  | L  | 719.36                              | 789.44                              | 7  |
| 7  | L  | 832.45                              | 676.35                              | 6  |
| 8  | E  | 961.49                              | 563.27                              | 5  |
| 9  | E  | 1090.53                             | 434.22                              | 4  |
| 10 | A  | 1161.57                             | 305.18                              | 3  |
| 11 | S  | 1248.60                             | 234.14                              | 2  |
| 12 | K  | -                                   | 147.11                              | 1  |

gi|70868943|gb|EAN83656.1| 3,2-trans-enoyl-CoA isomerase, mitochondrial precursor, putative [Trypanosoma cruzi] R.APVNSLSLELFEELNK.W M+H=1802.953491 DeltaM=1.30168 z=2  
P(pep)=1.02E-06 Xcorr=3.24 DCn=0.58

#5785-5785 NL: 3.80E1

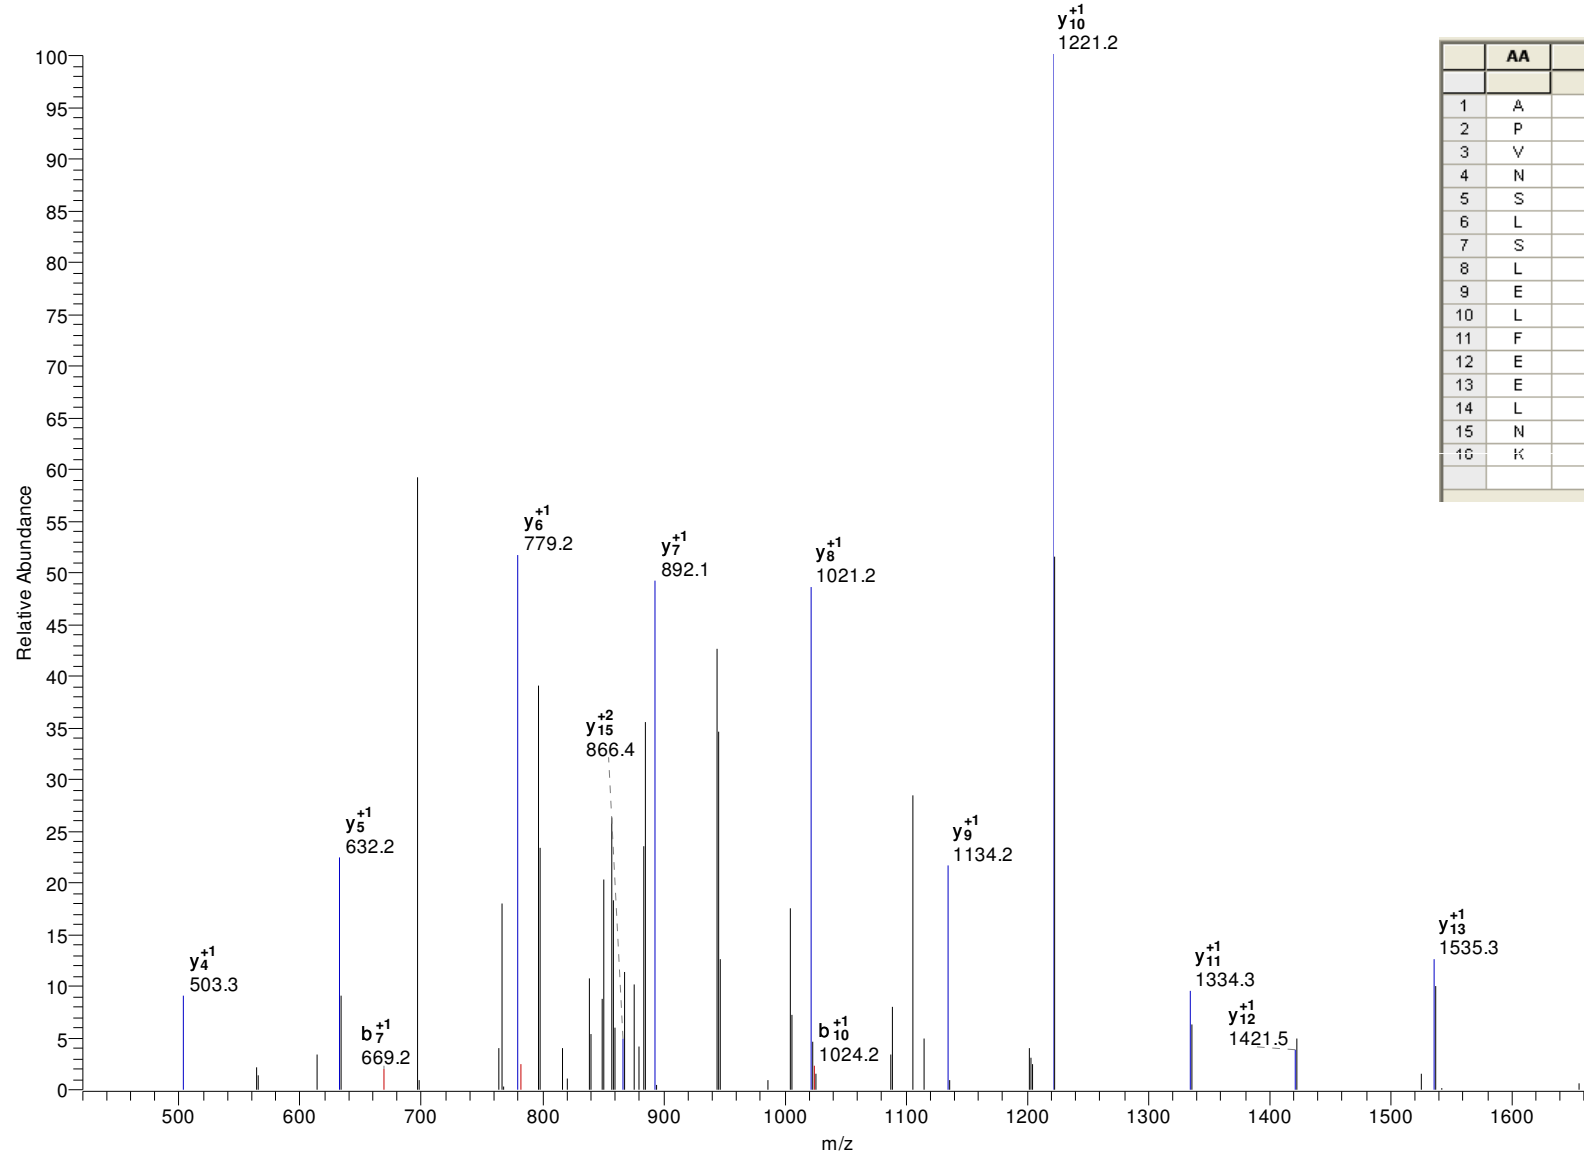

|    | AA | B                                   | Y                                   |    |
|----|----|-------------------------------------|-------------------------------------|----|
|    |    | <input checked="" type="checkbox"/> | <input checked="" type="checkbox"/> |    |
| 1  | A  | 72.04                               | -                                   | 16 |
| 2  | P  | 169.10                              | 1731.92                             | 15 |
| 3  | V  | 268.17                              | 1634.86                             | 14 |
| 4  | N  | 382.21                              | 1535.80                             | 13 |
| 5  | S  | 469.24                              | 1421.75                             | 12 |
| 6  | L  | 582.32                              | 1334.72                             | 11 |
| 7  | S  | 669.36                              | 1221.64                             | 10 |
| 8  | L  | 782.44                              | 1134.60                             | 9  |
| 9  | E  | 911.48                              | 1021.52                             | 8  |
| 10 | L  | 1024.57                             | 892.48                              | 7  |
| 11 | F  | 1171.64                             | 779.39                              | 6  |
| 12 | E  | 1300.68                             | 632.32                              | 5  |
| 13 | E  | 1429.72                             | 503.28                              | 4  |
| 14 | L  | 1542.81                             | 374.24                              | 3  |
| 15 | N  | 1656.85                             | 261.16                              | 2  |
| 16 | K  | -                                   | 147.11                              | 1  |

gi|70886602|gb|EAN99378.1| 40S ribosomal protein S5, putative [Trypanosoma cruzi]

K.TLPECLADEIVNASK.G

M+H=1659.825806

DeltaM=0.52141

z=2

P(pep)=8.59E-07

Xcorr=3.23

DCn=0.58

#4880-4880 NL: 8.34E2

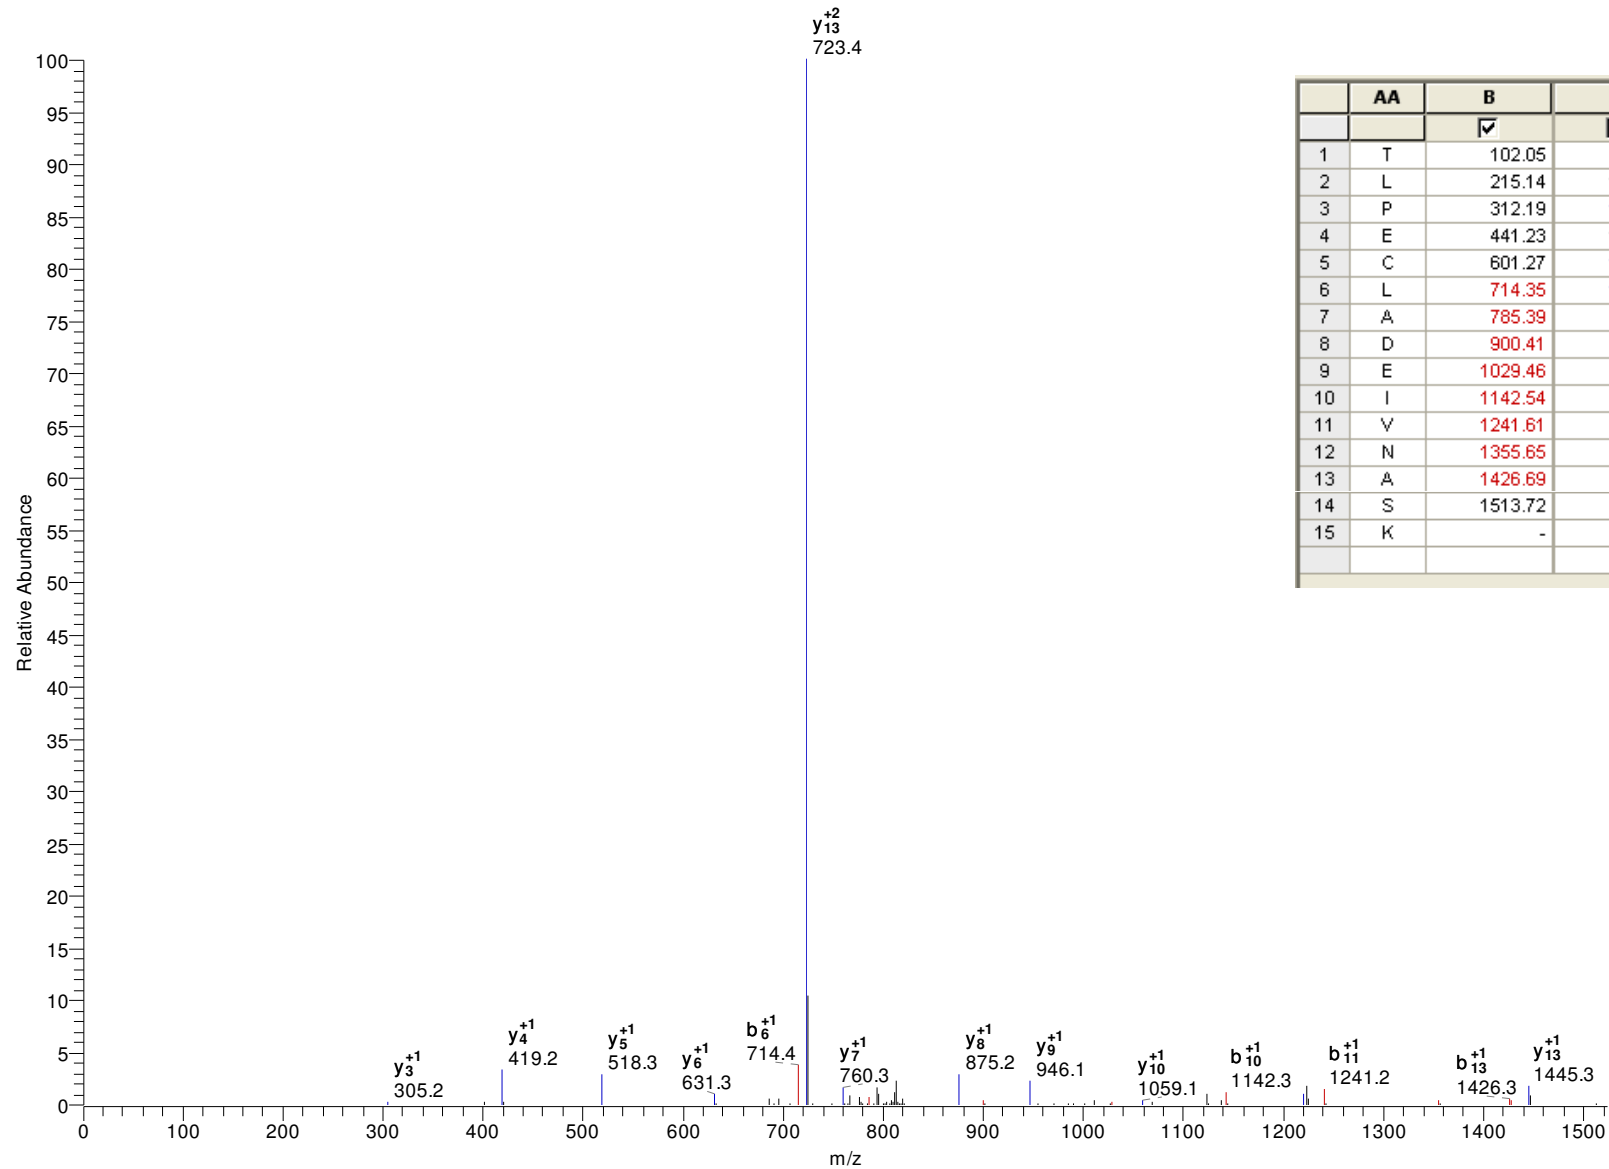

|    | AA | B       | Y       |    |
|----|----|---------|---------|----|
| 1  | T  | 102.05  | -       | 15 |
| 2  | L  | 215.14  | 1558.78 | 14 |
| 3  | P  | 312.19  | 1445.69 | 13 |
| 4  | E  | 441.23  | 1348.64 | 12 |
| 5  | C  | 601.27  | 1219.60 | 11 |
| 6  | L  | 714.35  | 1059.57 | 10 |
| 7  | A  | 785.39  | 946.48  | 9  |
| 8  | D  | 900.41  | 875.45  | 8  |
| 9  | E  | 1029.46 | 760.42  | 7  |
| 10 | I  | 1142.54 | 631.38  | 6  |
| 11 | V  | 1241.61 | 518.29  | 5  |
| 12 | N  | 1355.65 | 419.22  | 4  |
| 13 | A  | 1426.69 | 305.18  | 3  |
| 14 | S  | 1513.72 | 234.14  | 2  |
| 15 | K  | -       | 147.11  | 1  |

gi|70881937|gb|EAN94935.1| ABC transporter, putative [Trypanosoma cruzi]

K.DPPEGYDPVCSK.S

M+H=1363.583496

DeltaM=0.53618

z=2

P(pep)=1.29E-07

Xcorr=3.23

DCn=0.55

#2561-2561 NL: 1.68E2

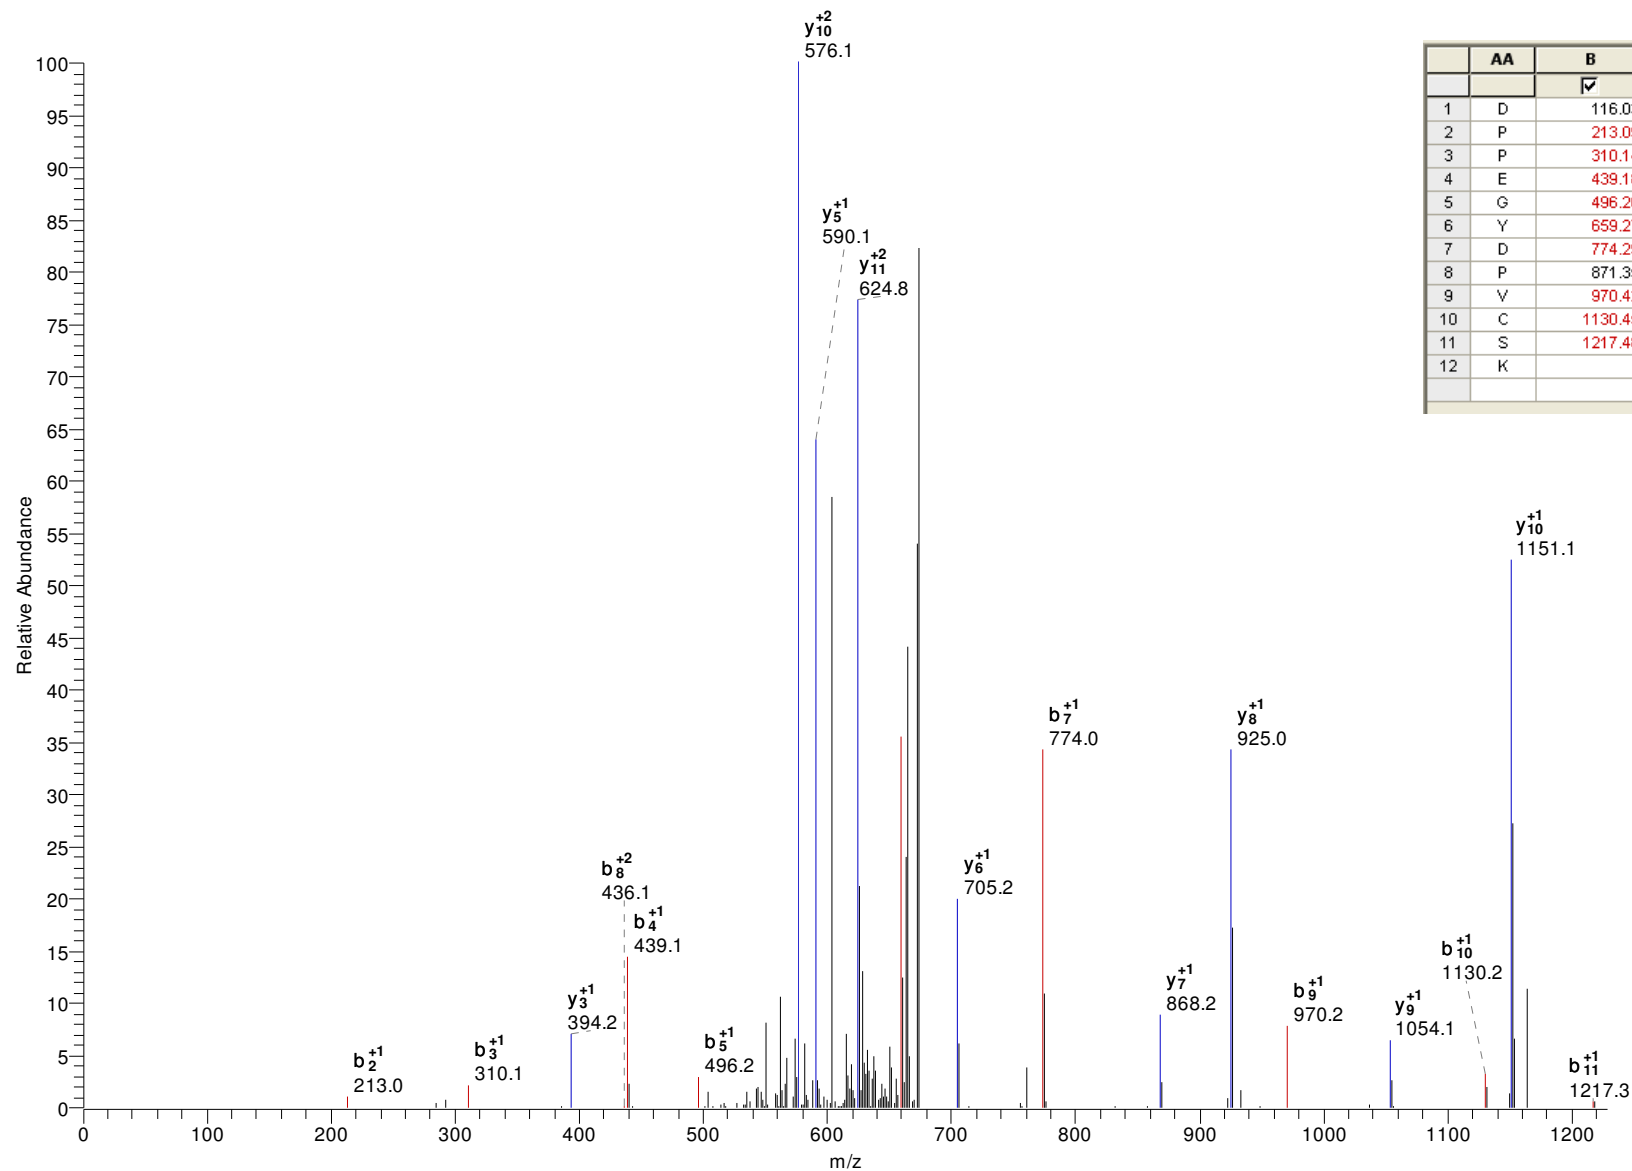

|    | AA | B                                   | Y                                   |    |
|----|----|-------------------------------------|-------------------------------------|----|
|    |    | <input checked="" type="checkbox"/> | <input checked="" type="checkbox"/> |    |
| 1  | D  | 116.03                              | -                                   | 12 |
| 2  | P  | 213.09                              | 1248.56                             | 11 |
| 3  | P  | 310.14                              | 1151.50                             | 10 |
| 4  | E  | 439.18                              | 1054.45                             | 9  |
| 5  | G  | 496.20                              | 925.41                              | 8  |
| 6  | Y  | 659.27                              | 868.39                              | 7  |
| 7  | D  | 774.29                              | 705.32                              | 6  |
| 8  | P  | 871.35                              | 590.30                              | 5  |
| 9  | V  | 970.42                              | 493.24                              | 4  |
| 10 | C  | 1130.45                             | 394.18                              | 3  |
| 11 | S  | 1217.48                             | 234.14                              | 2  |
| 12 | K  | -                                   | 147.11                              | 1  |

gi|70880707|gb|EAN93787.1| hypothetical protein, conserved [Trypanosoma cruzi]  
R.NLVSDTQYFYK.F M+H=1540.731812 DeltaM=0.64104 z=2  
P(pep)=2.08E-05 Xcorr=3.22 DCn=0.51

#4256-4256 NL: 1.35E2

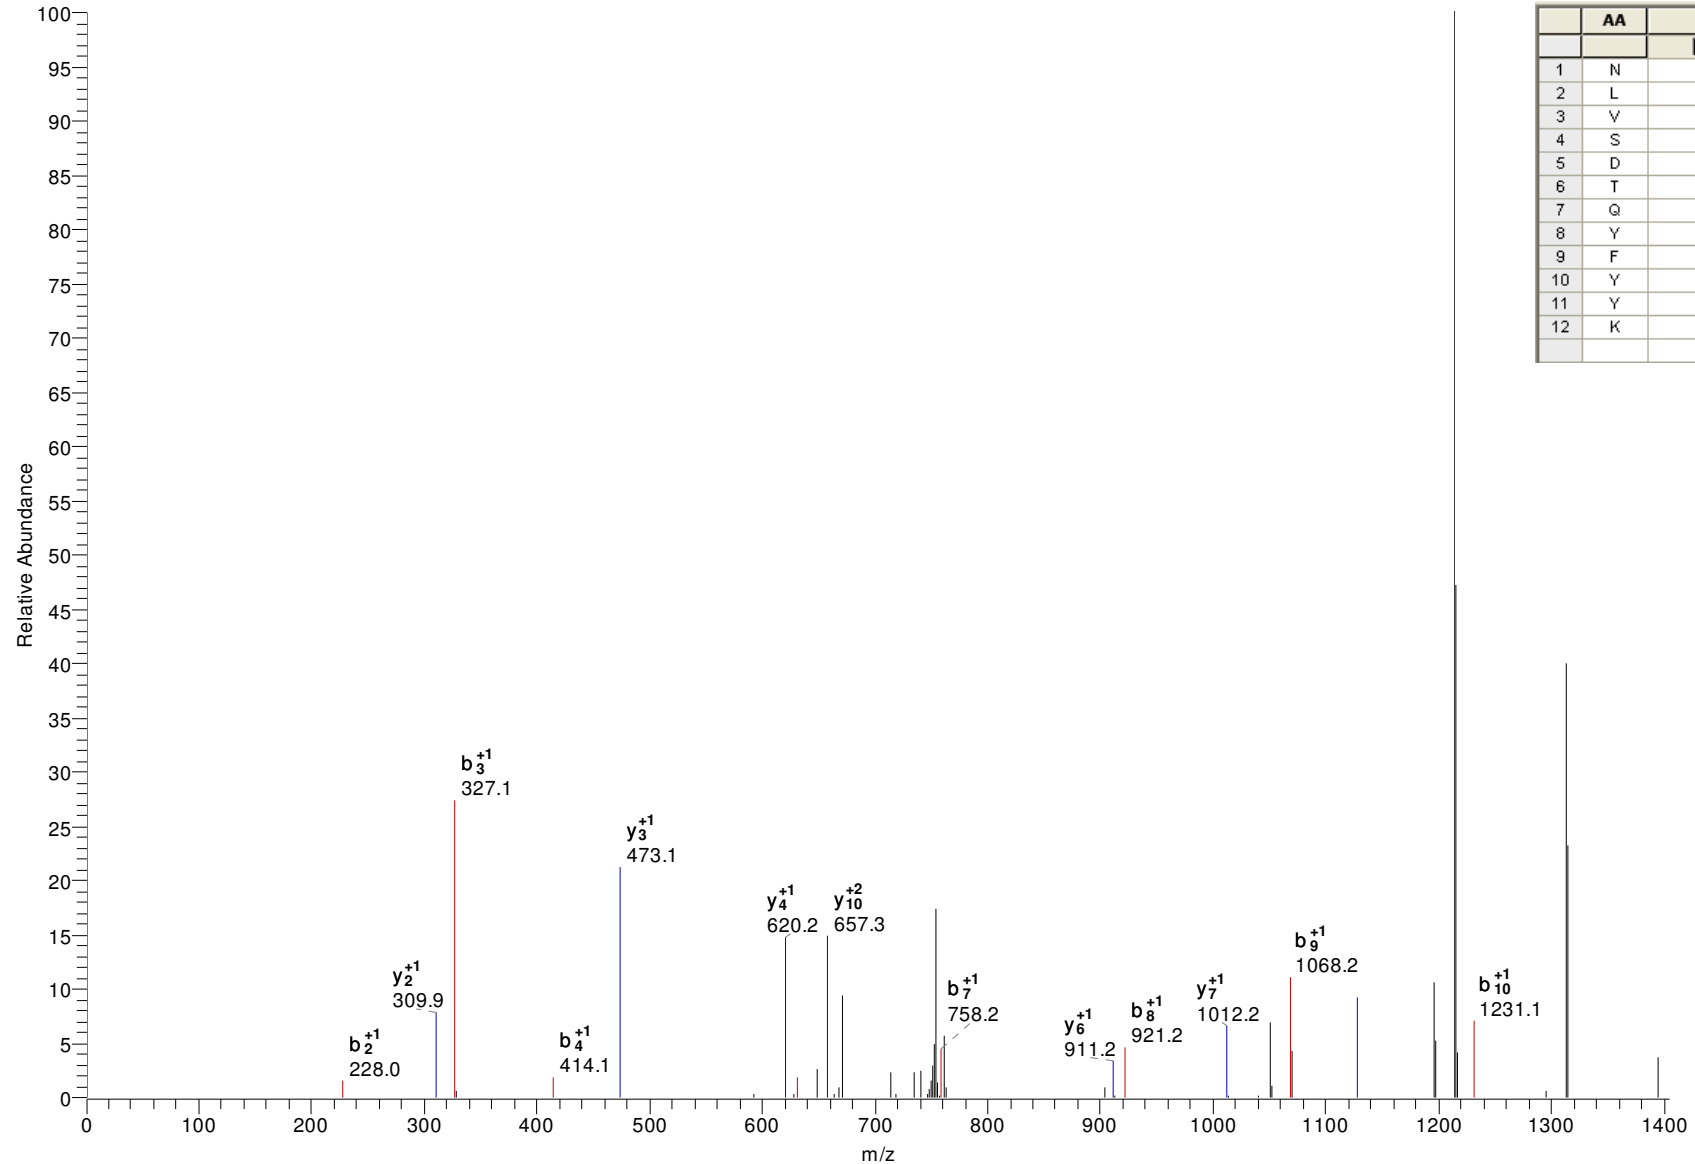

|    | AA | B       | Y       |    |
|----|----|---------|---------|----|
|    |    | ✓       | ✓       |    |
| 1  | N  | 115.05  | -       | 12 |
| 2  | L  | 228.13  | 1426.69 | 11 |
| 3  | V  | 327.20  | 1313.60 | 10 |
| 4  | S  | 414.23  | 1214.54 | 9  |
| 5  | D  | 529.26  | 1127.50 | 8  |
| 6  | T  | 630.31  | 1012.48 | 7  |
| 7  | Q  | 758.37  | 911.43  | 6  |
| 8  | Y  | 921.43  | 783.37  | 5  |
| 9  | F  | 1068.50 | 620.31  | 4  |
| 10 | Y  | 1231.56 | 473.24  | 3  |
| 11 | Y  | 1394.63 | 310.18  | 2  |
| 12 | K  | -       | 147.11  | 1  |

gi|70878534|gb|EAN91782.1| hypothetical protein, conserved [Trypanosoma cruzi]

R.LTVWDQGMTSAAFR.L

M+H=1582.768188

DeltaM=1.00566

z=2

P(pep)=6.38E-09

Xcorr=3.21

DCn=0.56

#4417-4417 NL: 5.21E1

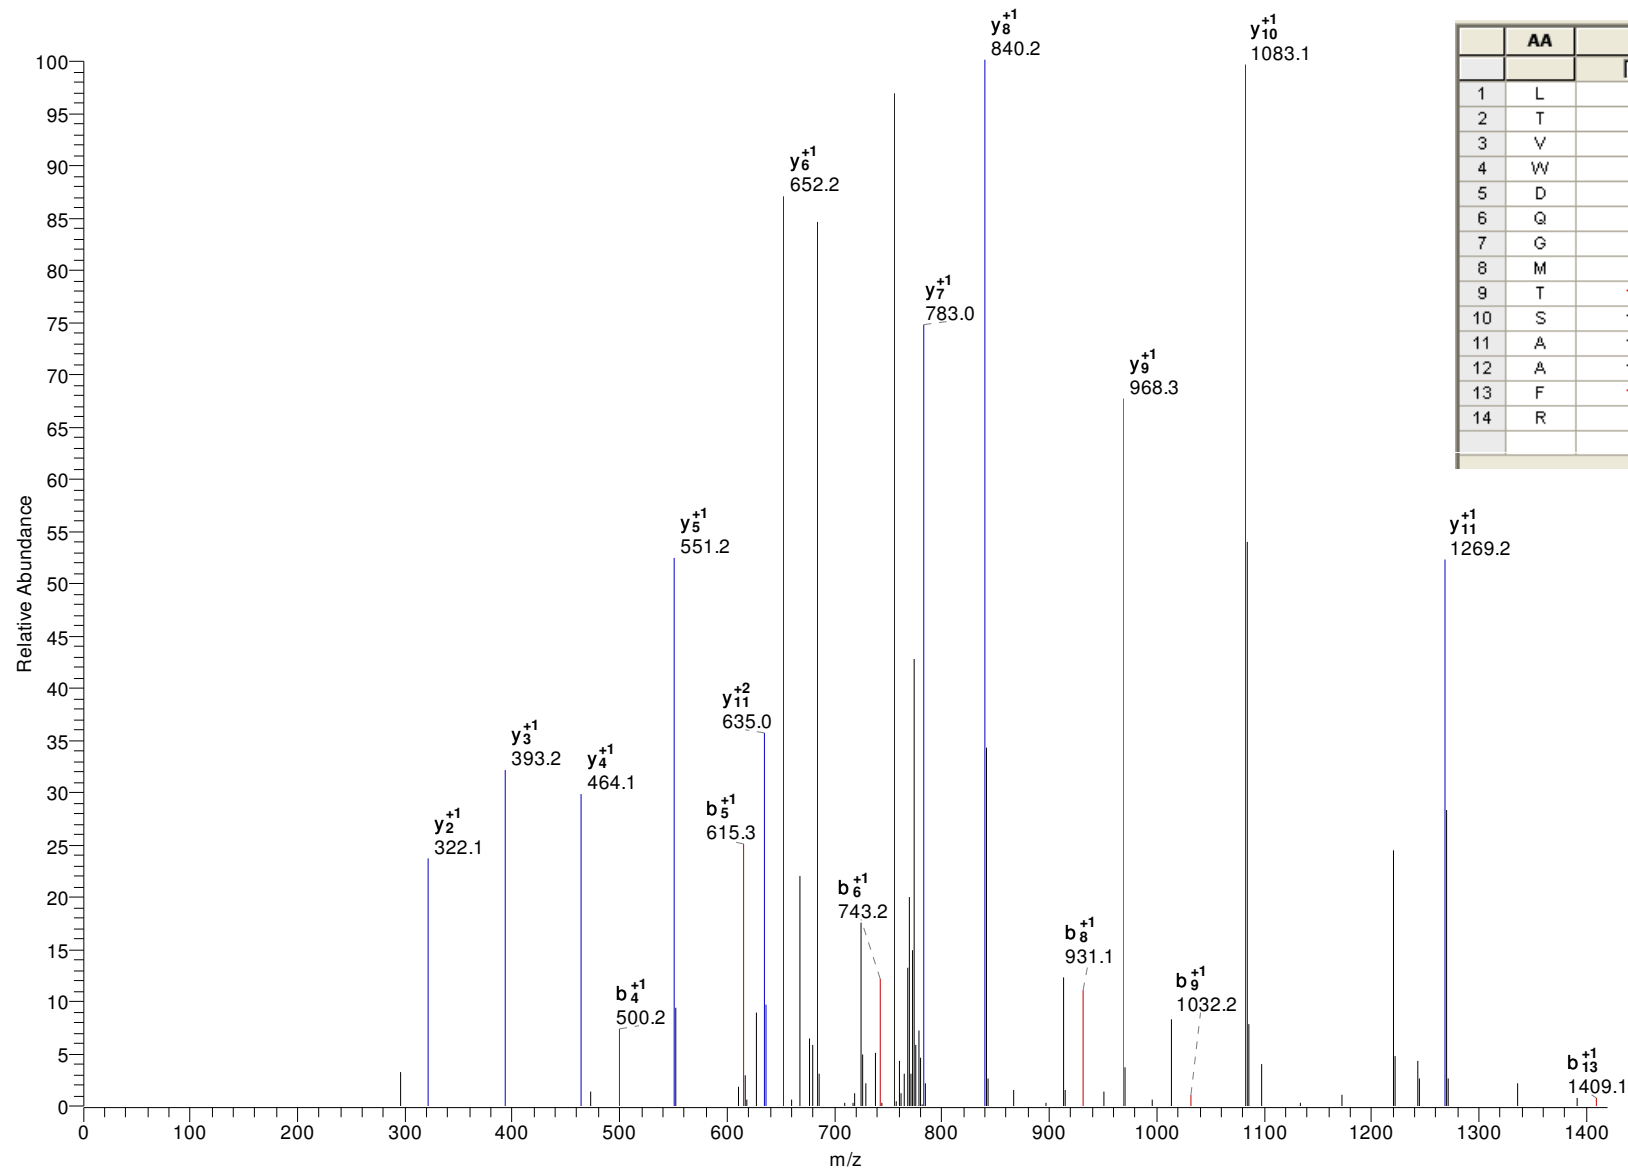

|    | AA | B                                   | Y                                   |    |
|----|----|-------------------------------------|-------------------------------------|----|
|    |    | <input checked="" type="checkbox"/> | <input checked="" type="checkbox"/> |    |
| 1  | L  | 114.09                              | -                                   | 14 |
| 2  | T  | 215.14                              | 1469.68                             | 13 |
| 3  | V  | 314.21                              | 1368.64                             | 12 |
| 4  | W  | 500.29                              | 1269.57                             | 11 |
| 5  | D  | 615.31                              | 1083.49                             | 10 |
| 6  | Q  | 743.37                              | 968.46                              | 9  |
| 7  | G  | 800.39                              | 840.40                              | 8  |
| 8  | M  | 931.43                              | 783.38                              | 7  |
| 9  | T  | 1032.48                             | 652.34                              | 6  |
| 10 | S  | 1119.51                             | 551.29                              | 5  |
| 11 | A  | 1190.55                             | 464.26                              | 4  |
| 12 | A  | 1261.59                             | 393.22                              | 3  |
| 13 | F  | 1408.66                             | 322.19                              | 2  |
| 14 | R  | -                                   | 175.12                              | 1  |

gi|70872519|gb|EAN86484.1| hypothetical protein, conserved [Trypanosoma cruzi]

K.LPLECILEVDALR.G

M+H=1540.840332

DeltaM=1.70842

z=2

P(pep)=1.21E-05

Xcorr=3.20

DCn=0.47

#5949-5949 NL: 3.00E1

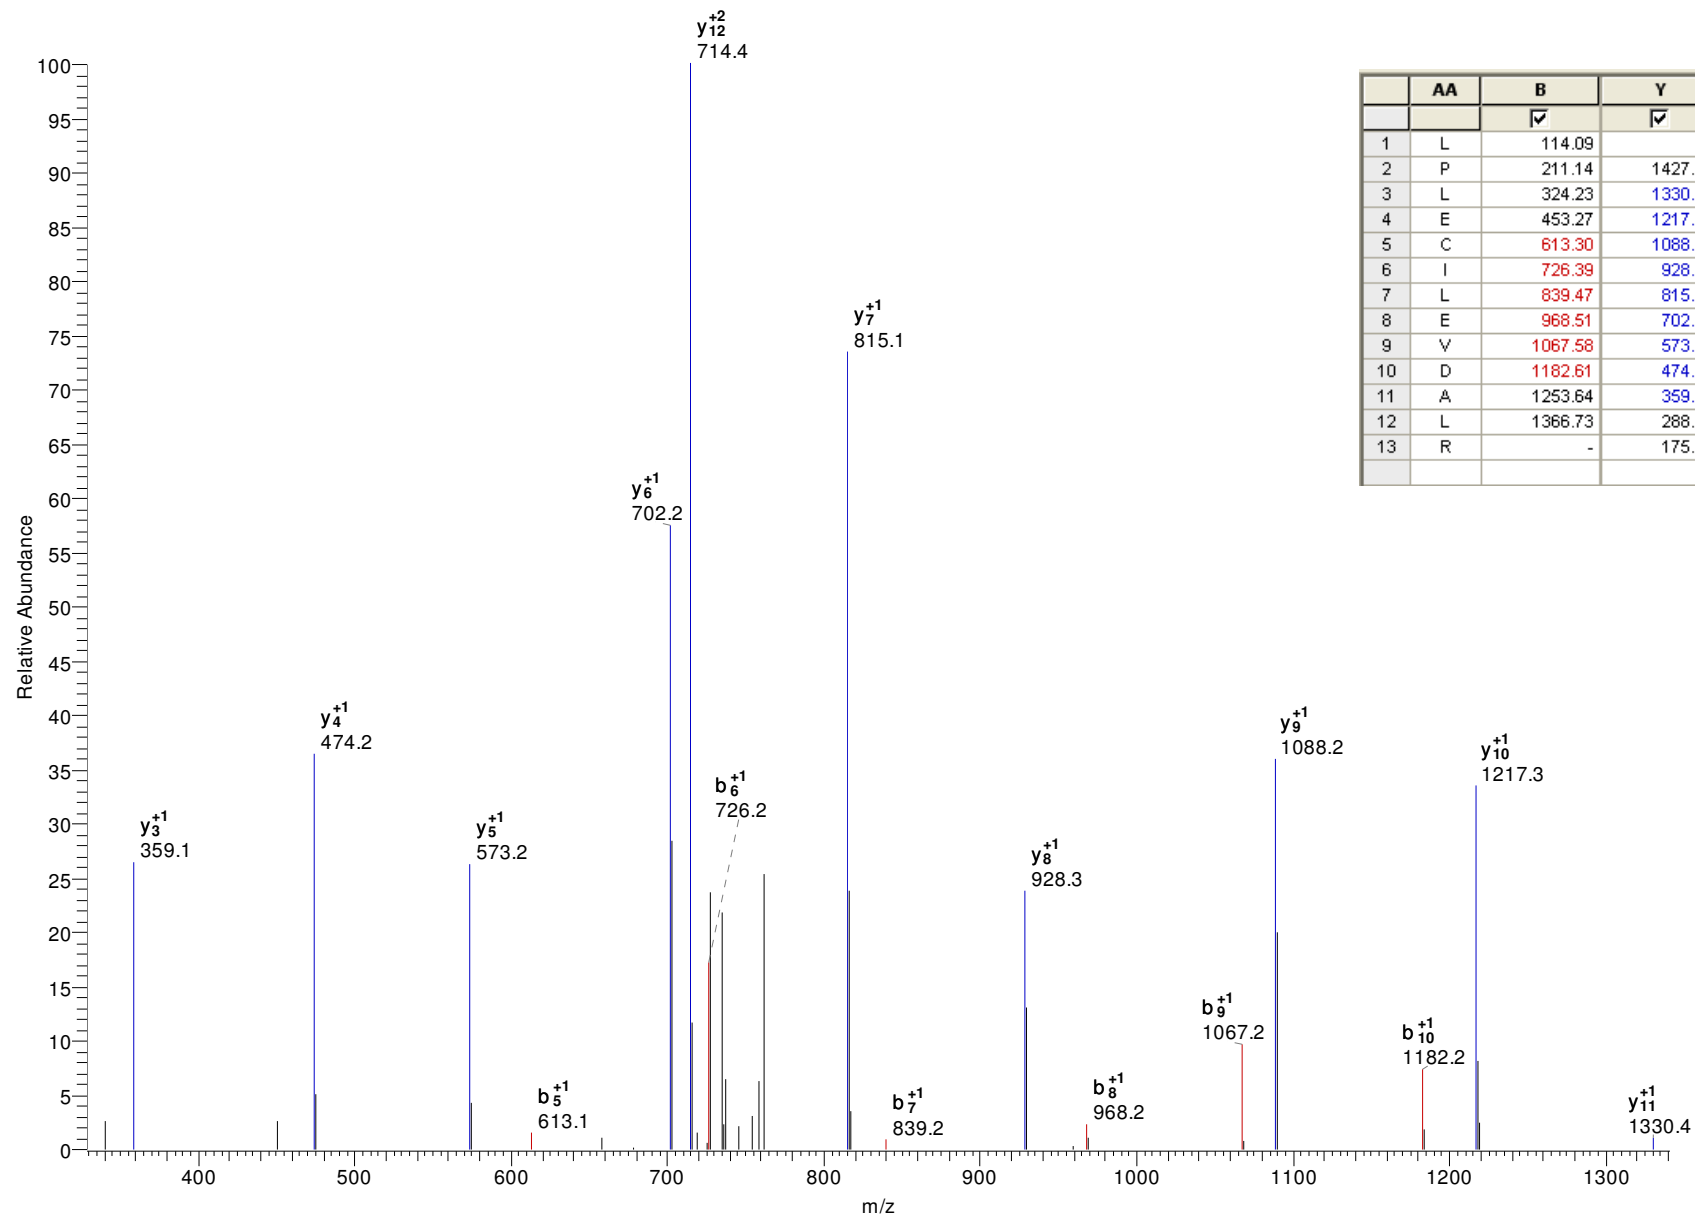

|    | AA | B                                   | Y                                   |    |
|----|----|-------------------------------------|-------------------------------------|----|
|    |    | <input checked="" type="checkbox"/> | <input checked="" type="checkbox"/> |    |
| 1  | L  | 114.09                              | -                                   | 13 |
| 2  | P  | 211.14                              | 1427.76                             | 12 |
| 3  | L  | 324.23                              | 1330.70                             | 11 |
| 4  | E  | 453.27                              | 1217.62                             | 10 |
| 5  | C  | 613.30                              | 1088.58                             | 9  |
| 6  | I  | 726.39                              | 928.55                              | 8  |
| 7  | L  | 839.47                              | 815.46                              | 7  |
| 8  | E  | 968.51                              | 702.38                              | 6  |
| 9  | V  | 1067.58                             | 573.34                              | 5  |
| 10 | D  | 1182.61                             | 474.27                              | 4  |
| 11 | A  | 1253.64                             | 359.24                              | 3  |
| 12 | L  | 1366.73                             | 288.20                              | 2  |
| 13 | R  | -                                   | 175.12                              | 1  |

# gi|42543197|pdb|1OGL|A Chain A, The Crystal Structure Of Native Trypanosoma Cruzi Dutpase

R.NIIQLASIYR.F

M+H=1190.689209

DeltaM=1.98296

z=2

P(pep)=3.27E-06

Xcorr=3.20

DCn=0.45

#4666-4666 NL: 8.47E1

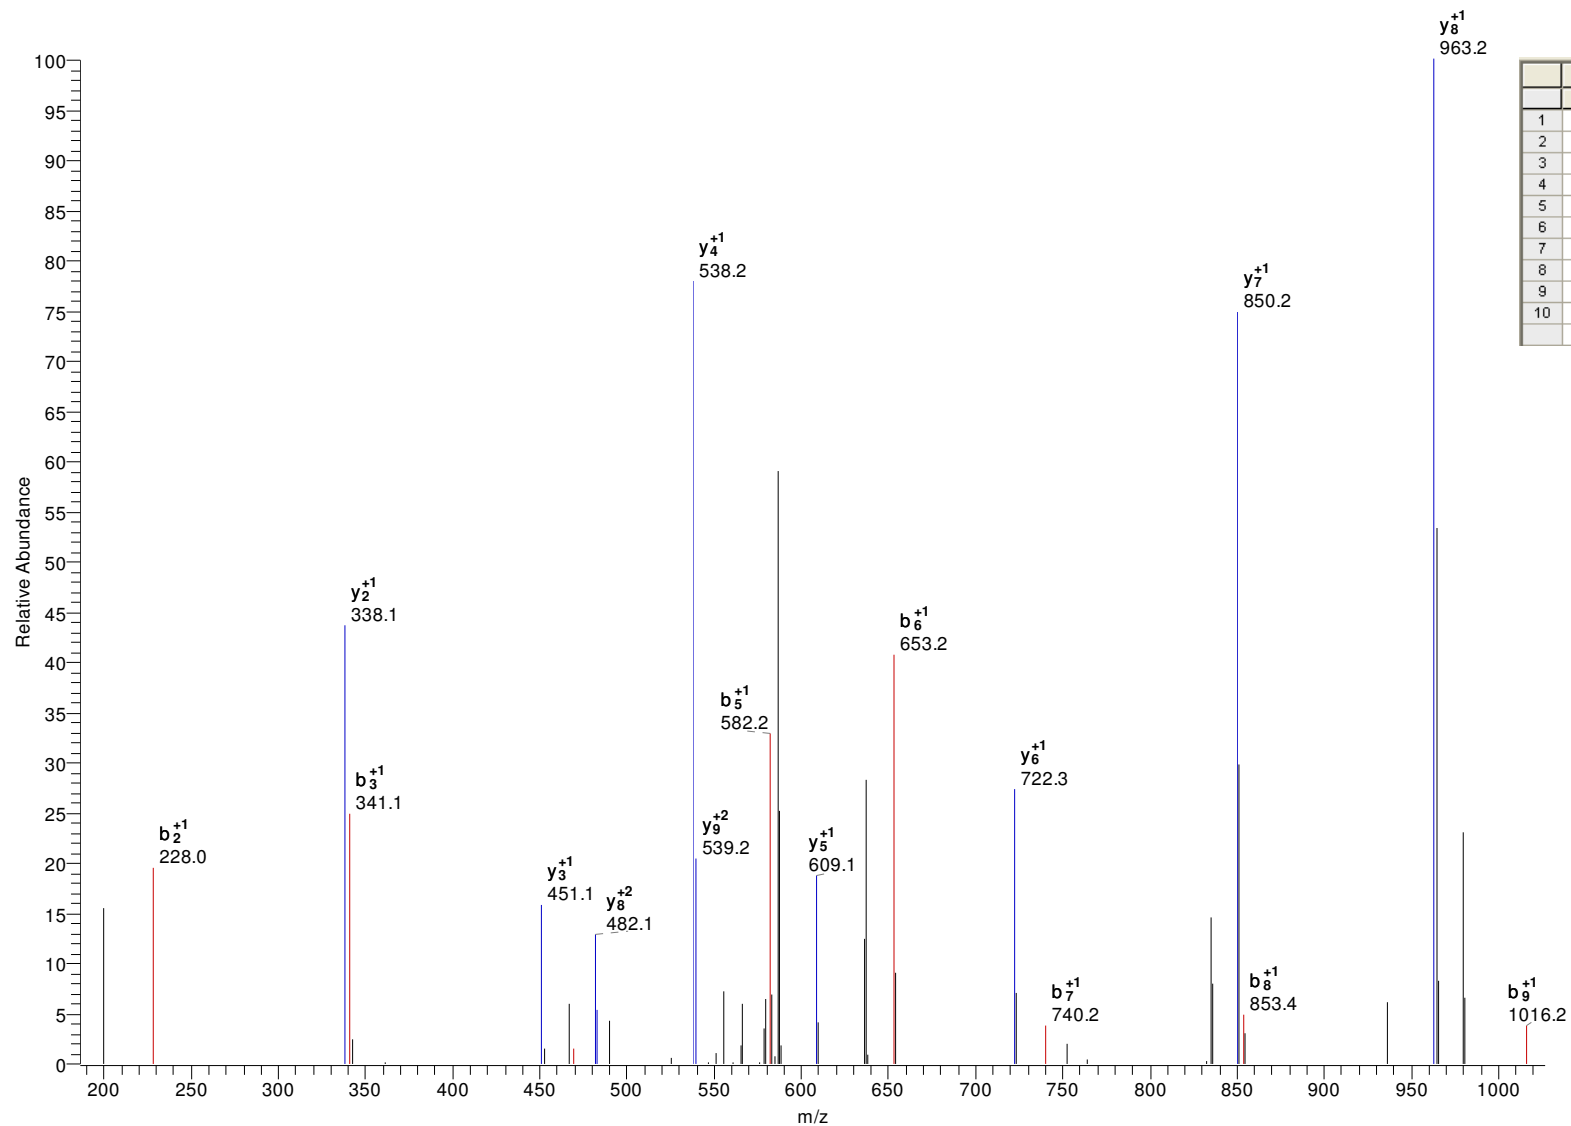

|    | AA | B       | Y       |    |
|----|----|---------|---------|----|
| 1  | N  | 115.05  | -       | 10 |
| 2  | I  | 228.13  | 1076.65 | 9  |
| 3  | I  | 341.22  | 963.56  | 8  |
| 4  | Q  | 469.28  | 850.48  | 7  |
| 5  | L  | 582.36  | 722.42  | 6  |
| 6  | A  | 653.40  | 609.34  | 5  |
| 7  | S  | 740.43  | 538.30  | 4  |
| 8  | I  | 853.51  | 451.27  | 3  |
| 9  | Y  | 1016.58 | 338.18  | 2  |
| 10 | R  | -       | 175.12  | 1  |



gi|70869775|gb|EAN84275.1| succinate dehydrogenase, putative [Trypanosoma cruzi]

R.EQFLGPAVLLQSYR.W

M+H=1620.87439

DeltaM=0.78606

z=2

P(pep)=5.66E-07

Xcorr=3.18

DCn=0.57

#5791-5791 NL: 4.92E1

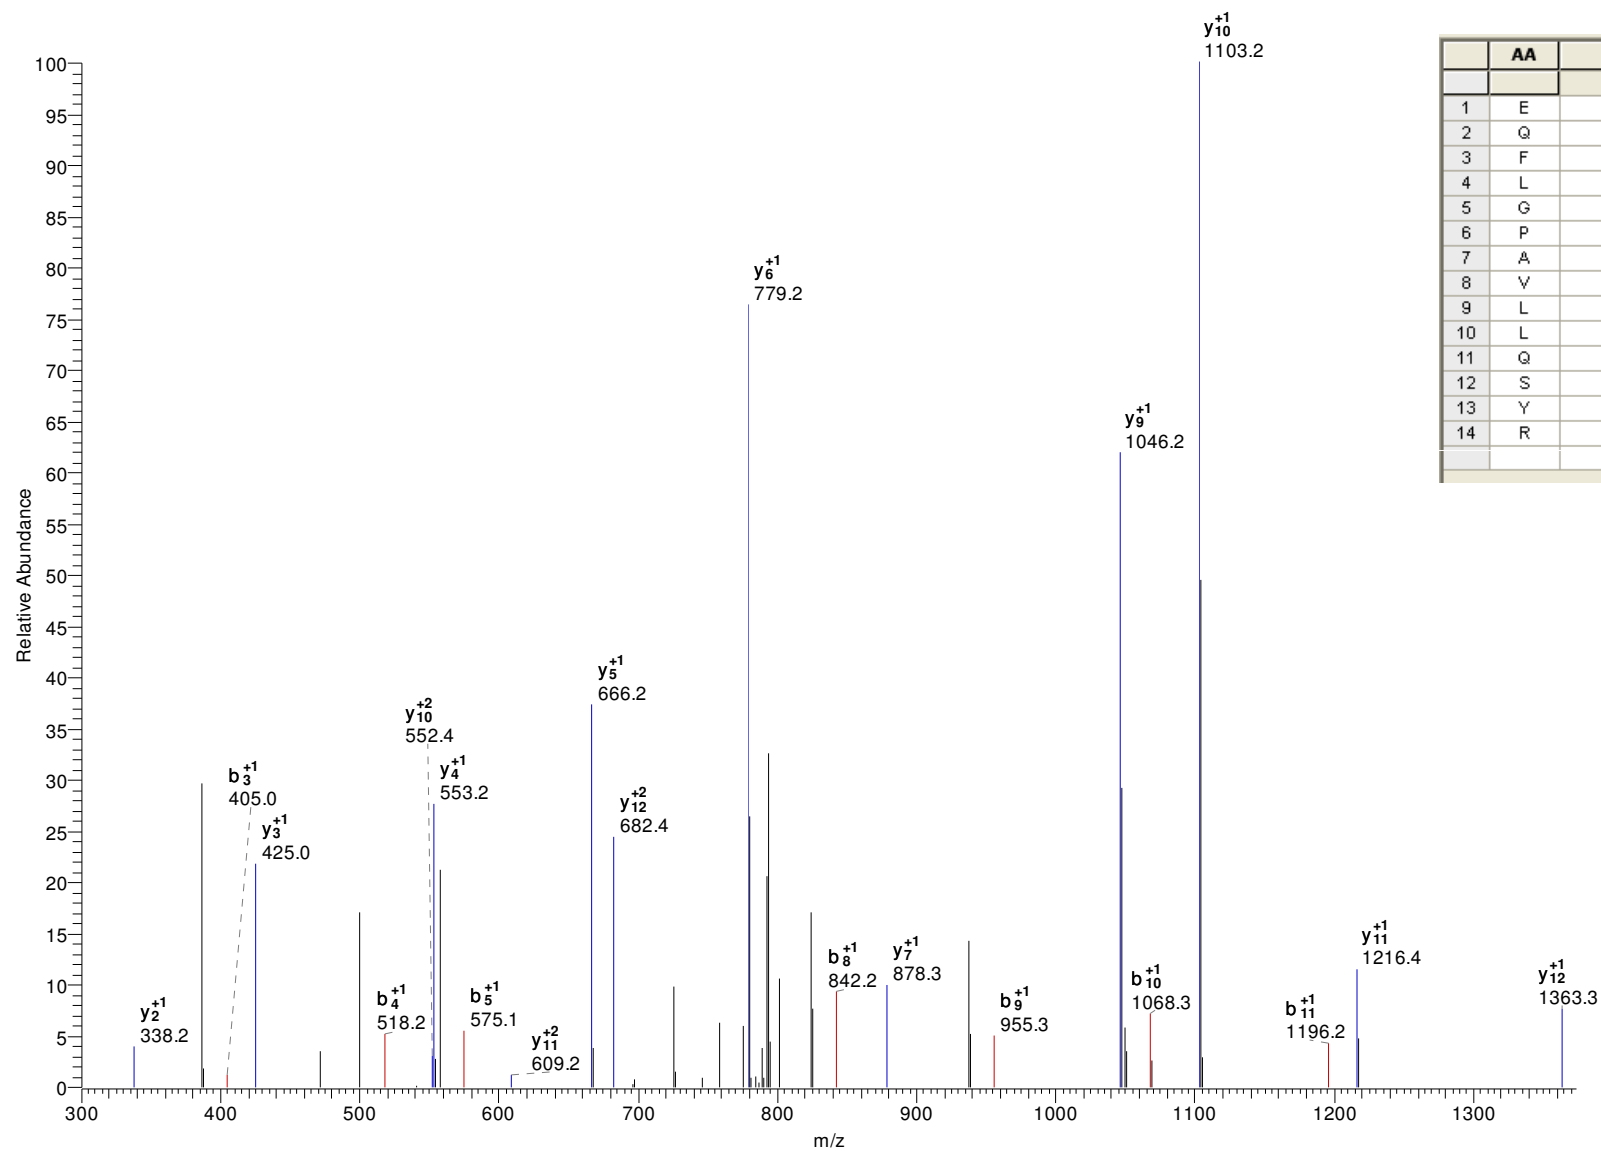

|    | AA | B       | Y       |    |
|----|----|---------|---------|----|
| 1  | E  | 130.05  | -       | 14 |
| 2  | Q  | 258.11  | 1491.83 | 13 |
| 3  | F  | 405.18  | 1363.77 | 12 |
| 4  | L  | 518.26  | 1216.70 | 11 |
| 5  | G  | 575.28  | 1103.62 | 10 |
| 6  | P  | 672.34  | 1046.60 | 9  |
| 7  | A  | 743.37  | 949.55  | 8  |
| 8  | V  | 842.44  | 878.51  | 7  |
| 9  | L  | 955.52  | 779.44  | 6  |
| 10 | L  | 1068.61 | 666.36  | 5  |
| 11 | Q  | 1196.67 | 553.27  | 4  |
| 12 | S  | 1283.70 | 425.21  | 3  |
| 13 | Y  | 1446.76 | 338.18  | 2  |
| 14 | R  | -       | 175.12  | 1  |

gi|15076959|gb|AAK82995.1| lanosterol synthase [Trypanosoma cruzi]

R.IRDAVDEILSLR.N

M+H=1399.790405

DeltaM=1.05876

z=2

P(pep)=0.000163921

Xcorr=3.16

DCn=0.38

#5226-5226 NL: 6.92E1

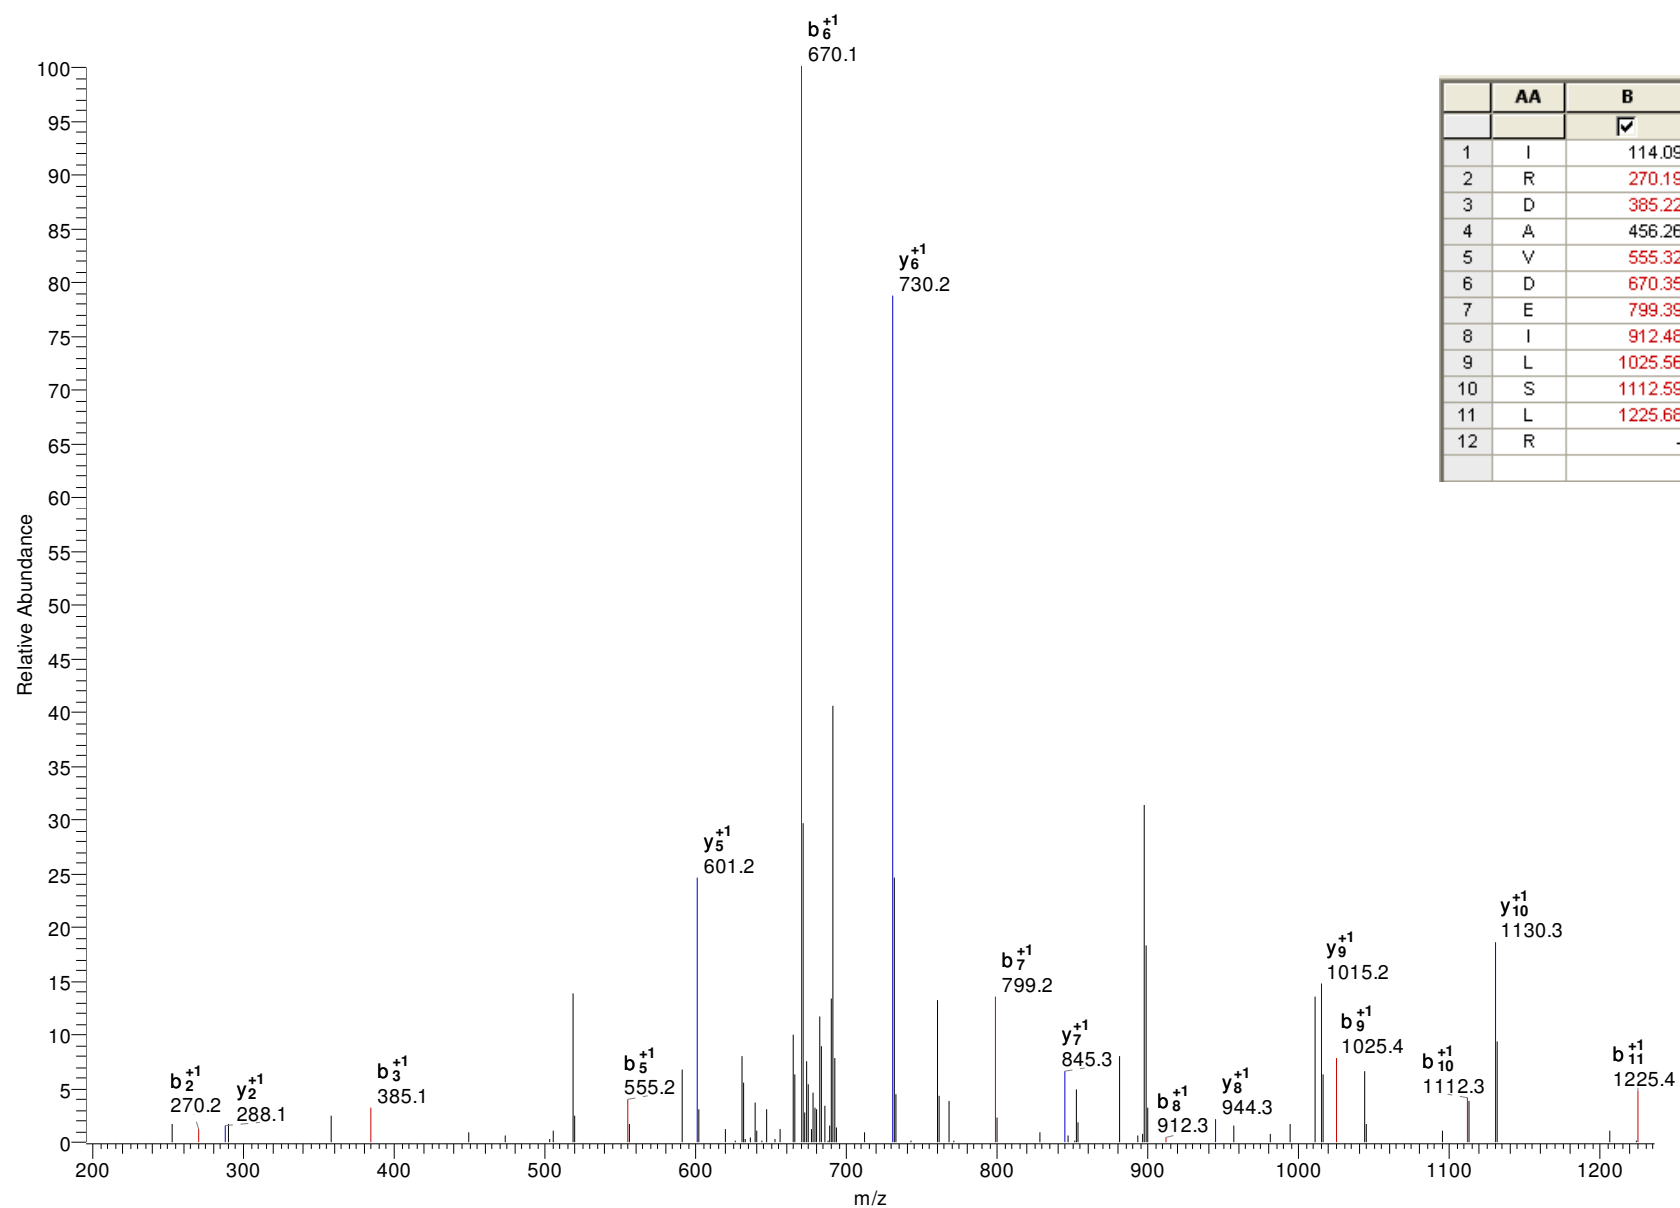

|    | AA | B                                   | Y                                   |    |
|----|----|-------------------------------------|-------------------------------------|----|
|    |    | <input checked="" type="checkbox"/> | <input checked="" type="checkbox"/> |    |
| 1  | I  | 114.09                              | -                                   | 12 |
| 2  | R  | 270.19                              | 1286.71                             | 11 |
| 3  | D  | 385.22                              | 1130.61                             | 10 |
| 4  | A  | 456.26                              | 1015.58                             | 9  |
| 5  | V  | 555.32                              | 944.54                              | 8  |
| 6  | D  | 670.35                              | 845.47                              | 7  |
| 7  | E  | 799.39                              | 730.45                              | 6  |
| 8  | I  | 912.48                              | 601.40                              | 5  |
| 9  | L  | 1025.56                             | 488.32                              | 4  |
| 10 | S  | 1112.59                             | 375.24                              | 3  |
| 11 | L  | 1225.68                             | 288.20                              | 2  |
| 12 | R  | -                                   | 175.12                              | 1  |

gi|70877159|gb|EAN90533.1| hypothetical protein, conserved [Trypanosoma cruzi]

K.CVAPSSTEVSDFNLT.K.D

M+H=1754.826538

DeltaM=1.20745

z=2

P(pep)=5.89E-08

Xcorr=3.14

DCn=0.54

#3549-3549 NL: 1.31E2

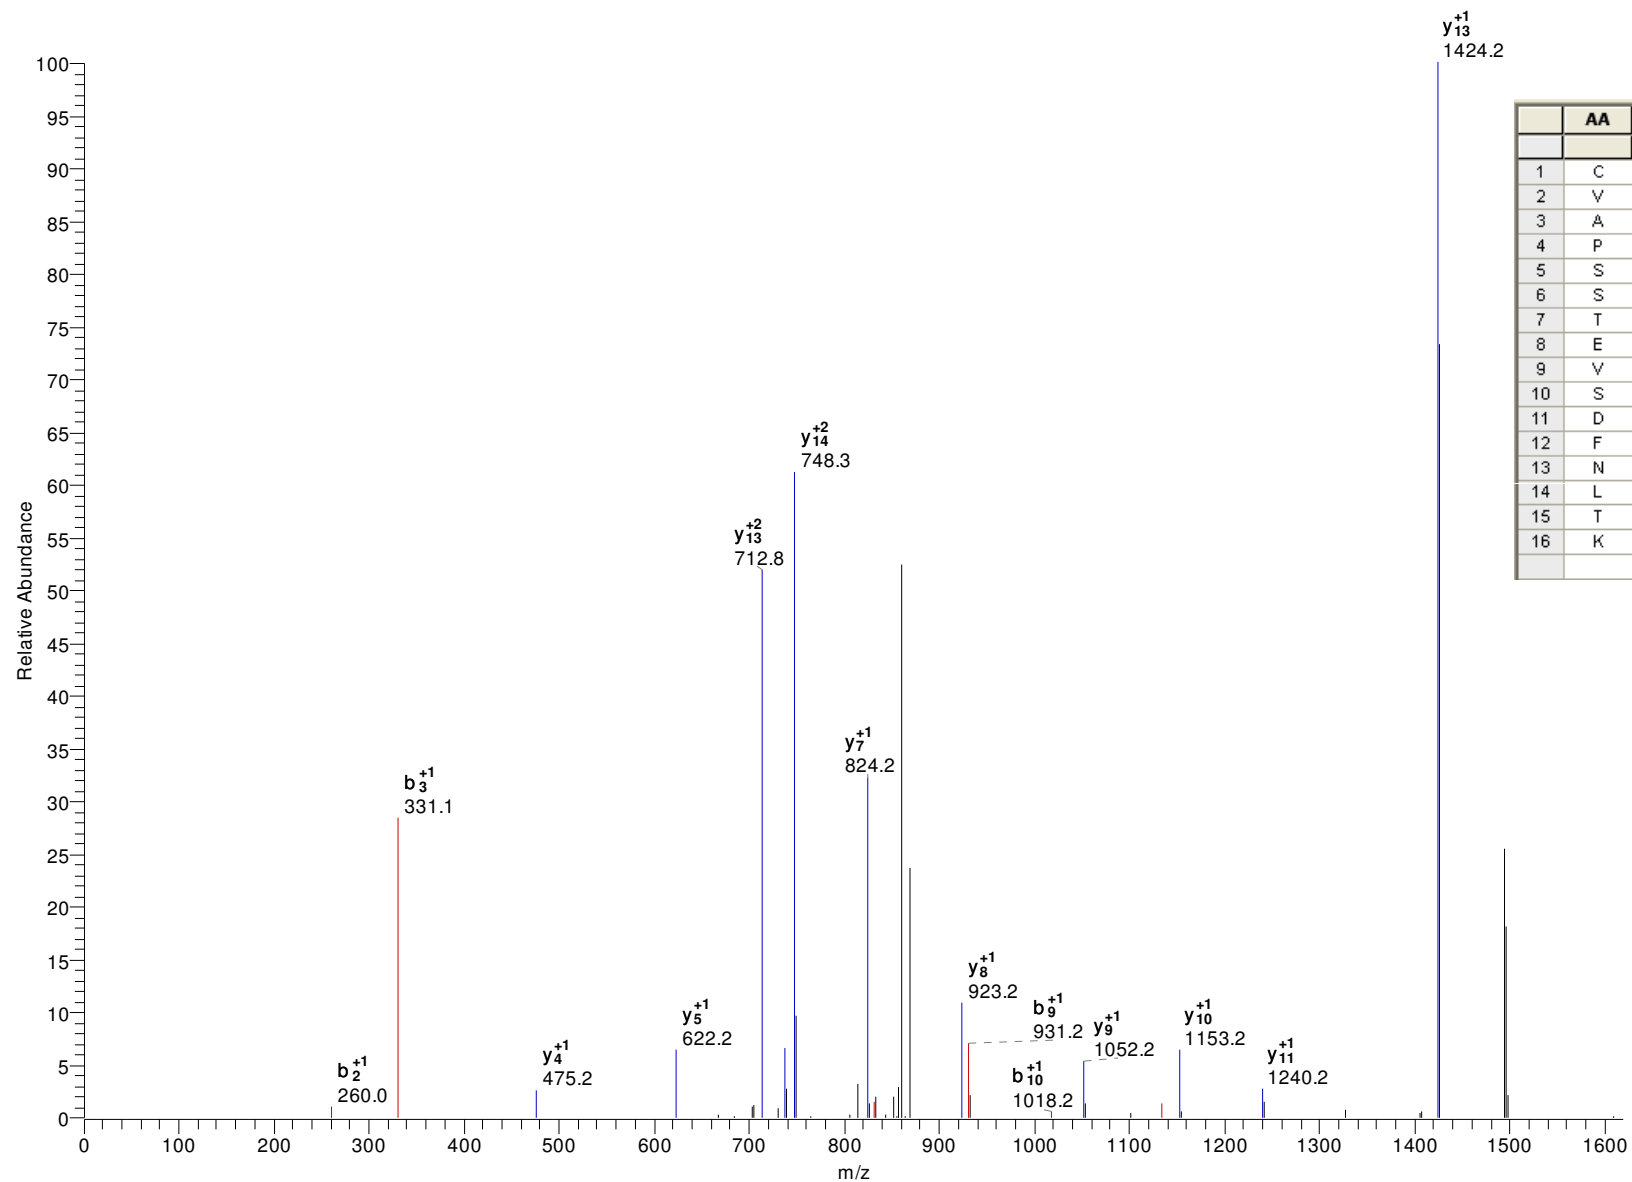

|    | AA | B                                   | Y                                   |    |
|----|----|-------------------------------------|-------------------------------------|----|
|    |    | <input checked="" type="checkbox"/> | <input checked="" type="checkbox"/> |    |
| 1  | C  | 161.04                              | -                                   | 16 |
| 2  | V  | 260.11                              | 1594.80                             | 15 |
| 3  | A  | 331.14                              | 1495.73                             | 14 |
| 4  | P  | 428.20                              | 1424.69                             | 13 |
| 5  | S  | 515.23                              | 1327.64                             | 12 |
| 6  | S  | 602.26                              | 1240.61                             | 11 |
| 7  | T  | 703.31                              | 1153.57                             | 10 |
| 8  | E  | 832.35                              | 1052.53                             | 9  |
| 9  | V  | 931.42                              | 923.48                              | 8  |
| 10 | S  | 1018.45                             | 824.41                              | 7  |
| 11 | D  | 1133.48                             | 737.38                              | 6  |
| 12 | F  | 1280.55                             | 622.36                              | 5  |
| 13 | N  | 1394.59                             | 475.29                              | 4  |
| 14 | L  | 1507.67                             | 361.24                              | 3  |
| 15 | T  | 1608.72                             | 248.16                              | 2  |
| 16 | K  | -                                   | 147.11                              | 1  |

gi|70865058|gb|EAN81396.1| hypothetical protein, conserved [Trypanosoma cruzi]

R.IDDFLTVDVGALAGAQTTPGR.Y M+H=1916.971191 DeltaM=1.12529 z=2

P(pep)=2.47E-05

Xcorr=3.13

DCn=0.53

#5486-5486 NL: 1.91E1

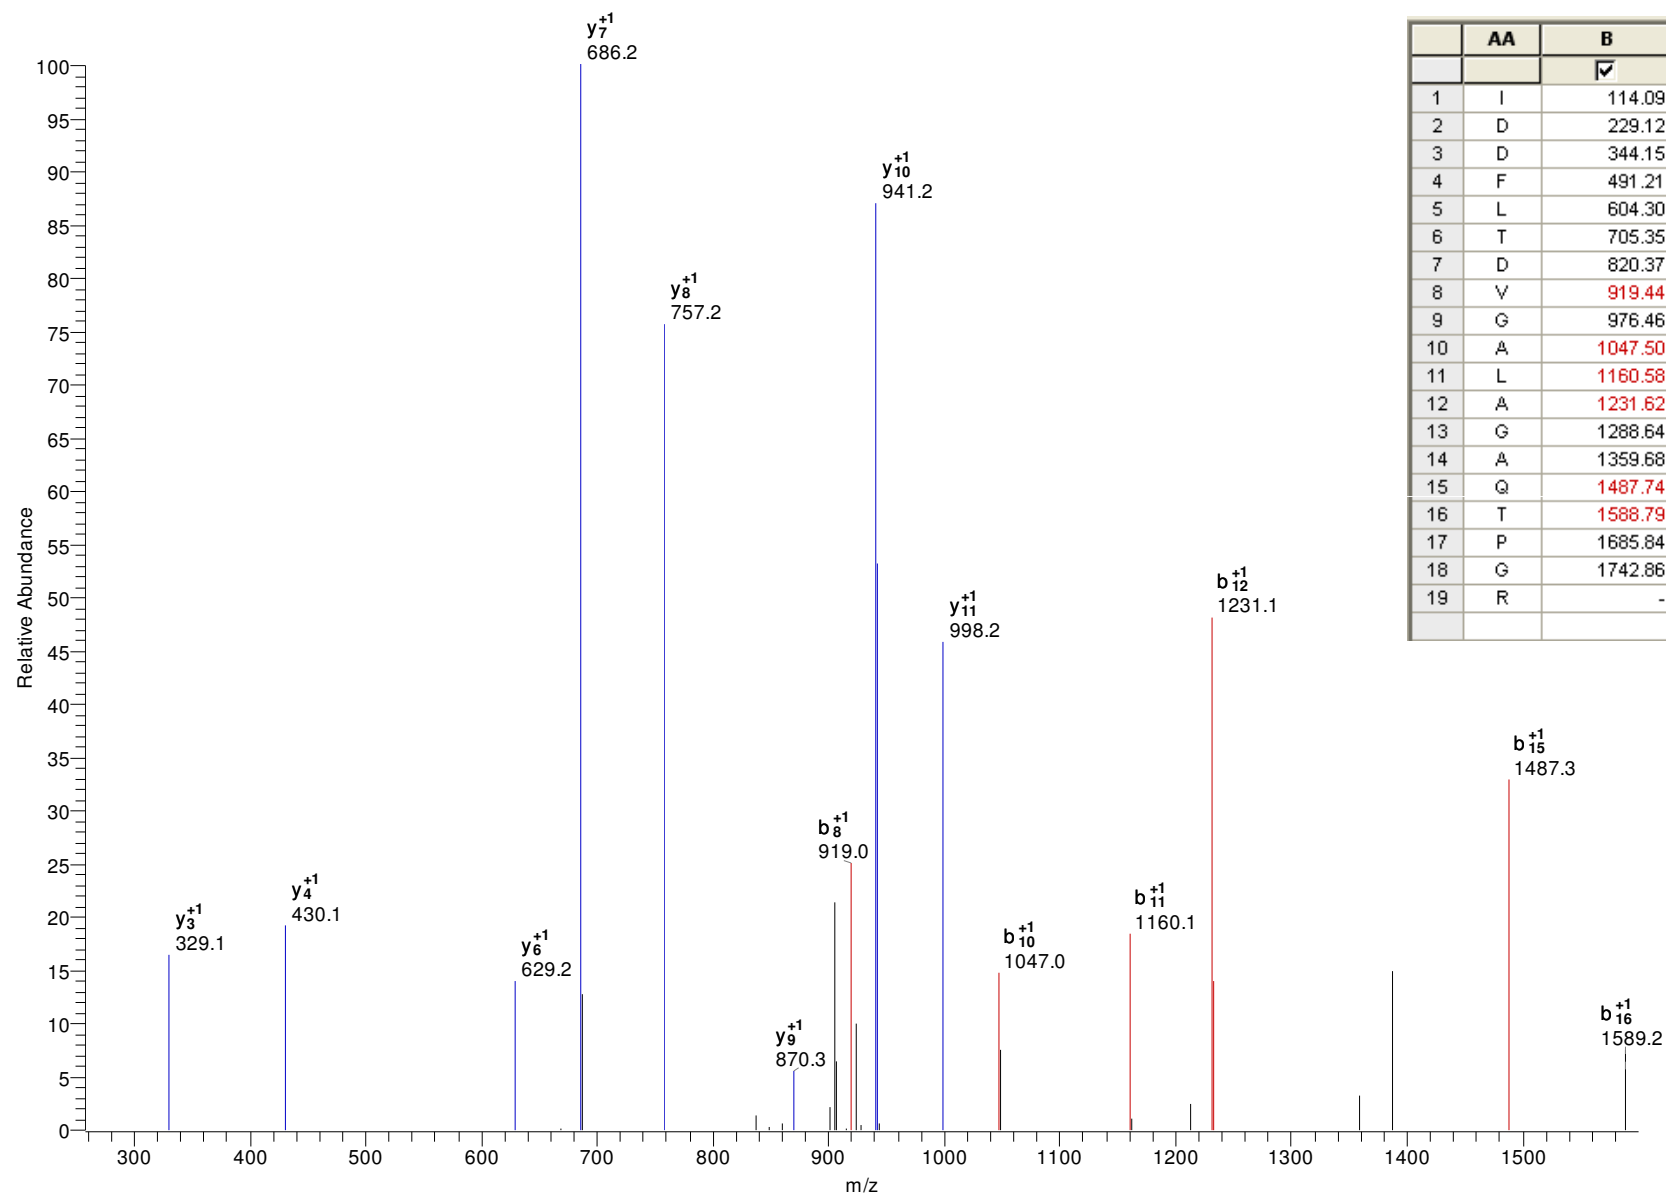

|    | AA | B                                   | Y                                   |    |
|----|----|-------------------------------------|-------------------------------------|----|
|    |    | <input checked="" type="checkbox"/> | <input checked="" type="checkbox"/> |    |
| 1  | I  | 114.09                              | -                                   | 19 |
| 2  | D  | 229.12                              | 1803.89                             | 18 |
| 3  | D  | 344.15                              | 1688.86                             | 17 |
| 4  | F  | 491.21                              | 1573.83                             | 16 |
| 5  | L  | 604.30                              | 1426.76                             | 15 |
| 6  | T  | 705.35                              | 1313.68                             | 14 |
| 7  | D  | 820.37                              | 1212.63                             | 13 |
| 8  | V  | 919.44                              | 1097.61                             | 12 |
| 9  | G  | 976.46                              | 998.54                              | 11 |
| 10 | A  | 1047.50                             | 941.52                              | 10 |
| 11 | L  | 1160.58                             | 870.48                              | 9  |
| 12 | A  | 1231.62                             | 757.40                              | 8  |
| 13 | G  | 1288.64                             | 686.36                              | 7  |
| 14 | A  | 1359.68                             | 629.34                              | 6  |
| 15 | Q  | 1487.74                             | 558.30                              | 5  |
| 16 | T  | 1588.79                             | 430.24                              | 4  |
| 17 | P  | 1685.84                             | 329.19                              | 3  |
| 18 | G  | 1742.86                             | 232.14                              | 2  |
| 19 | R  | -                                   | 175.12                              | 1  |

gi|70876009|gb|EAN89502.1| D-isomer specific 2-hydroxyacid dehydrogenase-protein, putative [Trypanosoma cruzi]  
 K.VGIIGYGDIGQASAK.L M+H=1448.774414 DeltaM=0.63164 z=2  
 P(pep)=1.97E-06 Xcorr=3.12 DCn=0.42

#3840-3840 NL: 1.23E2

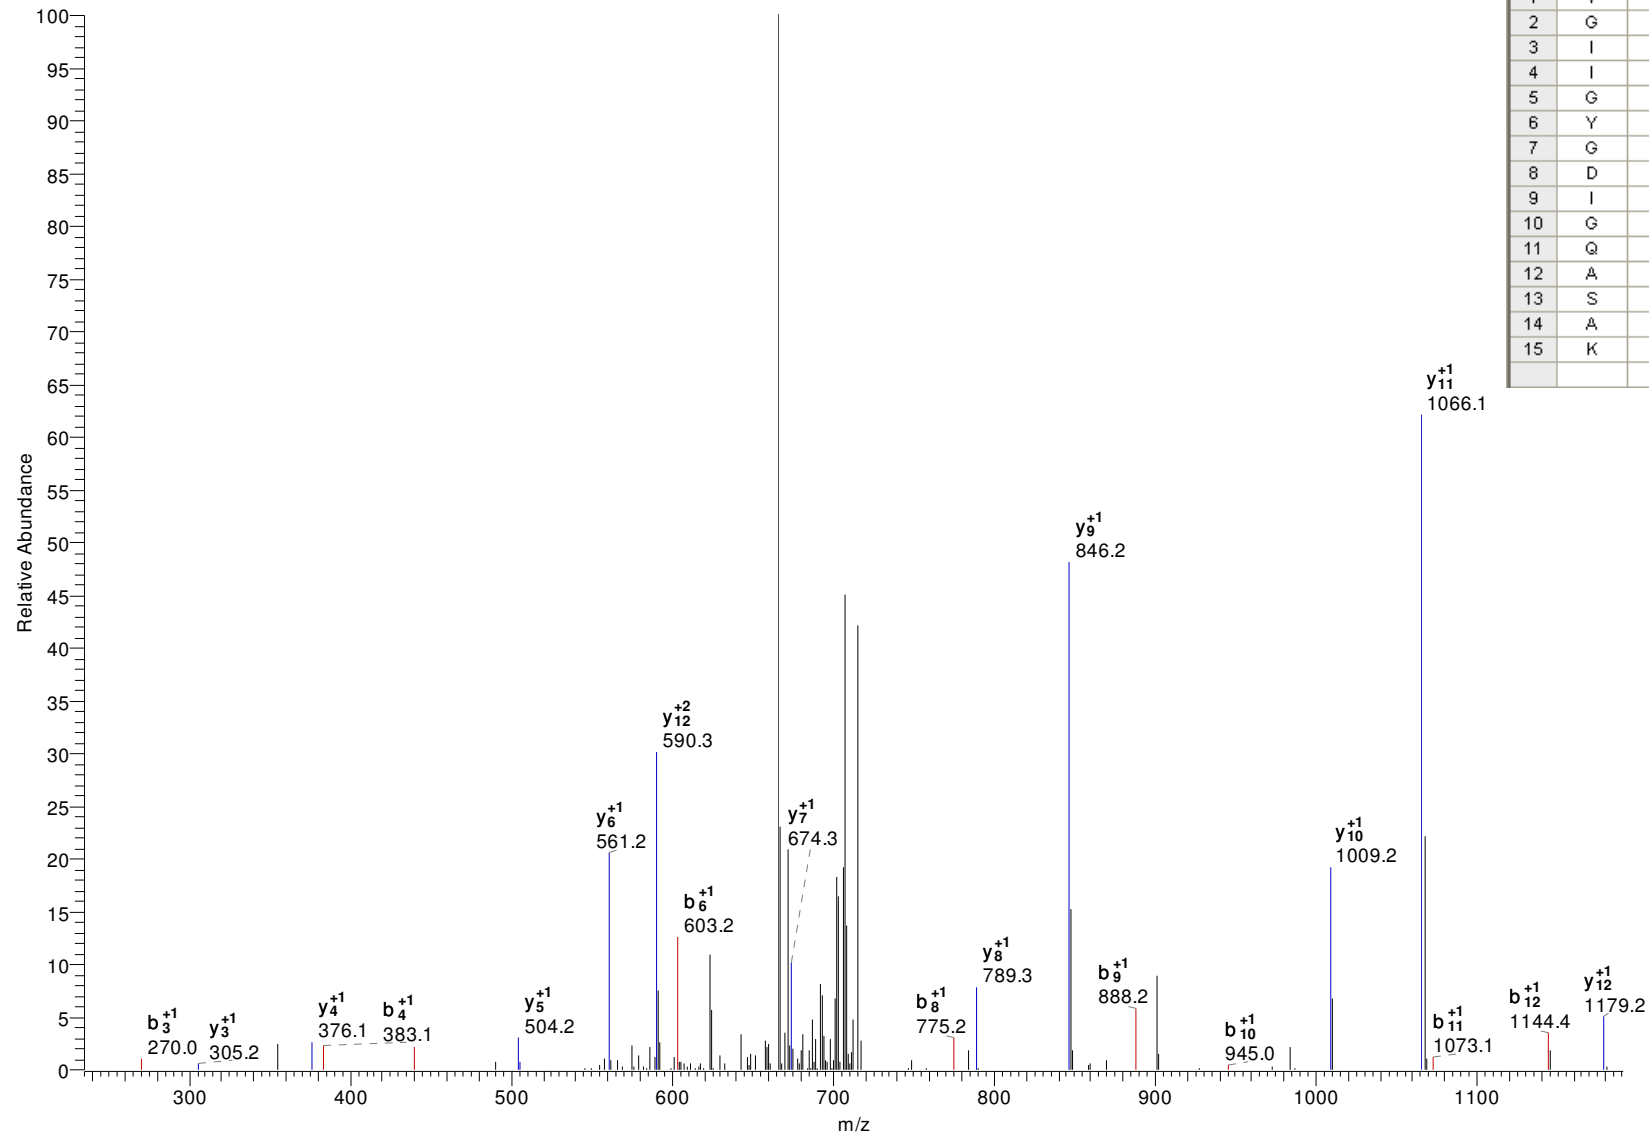

|    | AA | B                                   | Y                                   |    |
|----|----|-------------------------------------|-------------------------------------|----|
|    |    | <input checked="" type="checkbox"/> | <input checked="" type="checkbox"/> |    |
| 1  | V  | 100.08                              | -                                   | 15 |
| 2  | G  | 157.10                              | 1349.71                             | 14 |
| 3  | I  | 270.18                              | 1292.68                             | 13 |
| 4  | I  | 383.27                              | 1179.60                             | 12 |
| 5  | G  | 440.29                              | 1066.52                             | 11 |
| 6  | Y  | 603.35                              | 1009.49                             | 10 |
| 7  | G  | 660.37                              | 846.43                              | 9  |
| 8  | D  | 775.40                              | 789.41                              | 8  |
| 9  | I  | 888.48                              | 674.38                              | 7  |
| 10 | G  | 945.50                              | 561.30                              | 6  |
| 11 | Q  | 1073.56                             | 504.28                              | 5  |
| 12 | A  | 1144.60                             | 376.22                              | 4  |
| 13 | S  | 1231.63                             | 305.18                              | 3  |
| 14 | A  | 1302.67                             | 218.15                              | 2  |
| 15 | K  | -                                   | 147.11                              | 1  |

gi|70866533|gb|EAN82034.1| surface glycoprotein, putative [Trypanosoma cruzi]  
 R.TPGMCELD.R.T M+H=1078.465576 DeltaM=1.80766 z=2  
 P(pep)=1.90E-05 Xcorr=3.11 DCn=0.40

#2360-2360 NL: 6.13E2

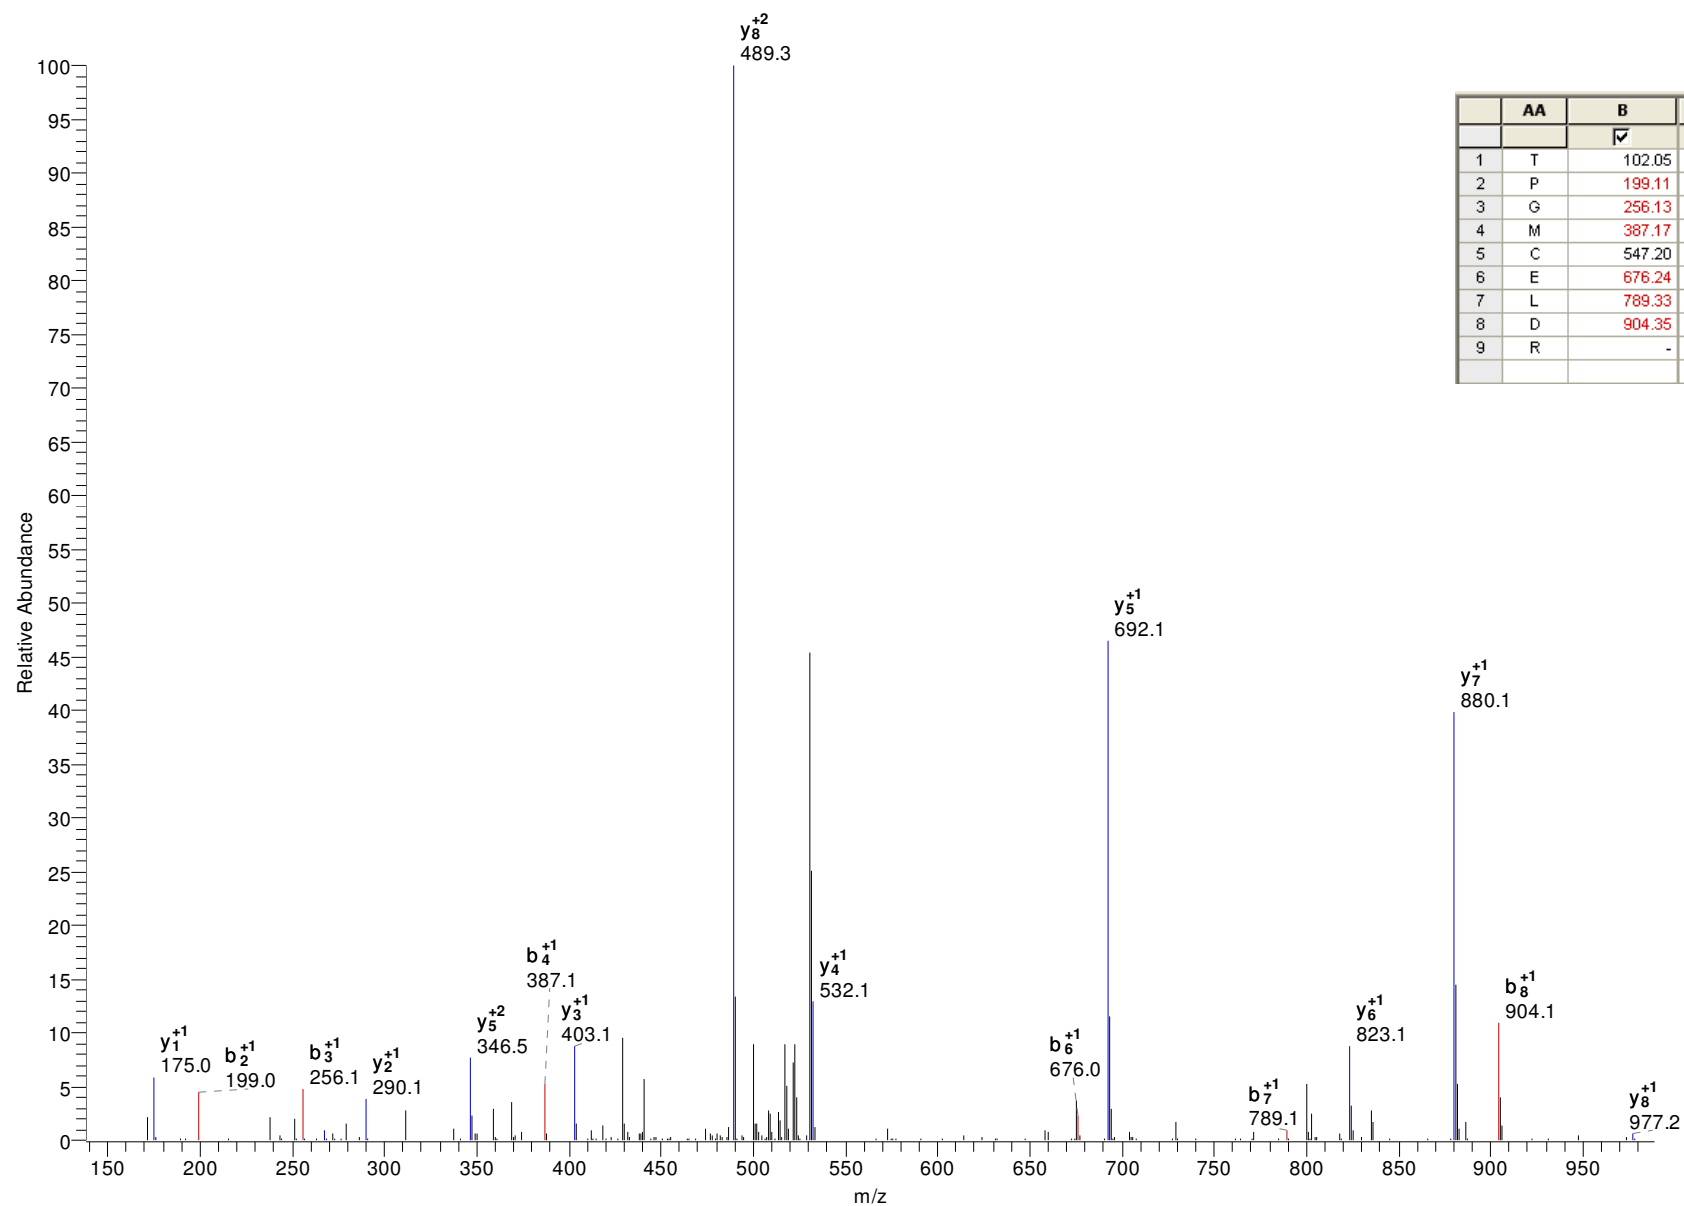

|   | AA | B                                   | Y                                   |   |
|---|----|-------------------------------------|-------------------------------------|---|
|   |    | <input checked="" type="checkbox"/> | <input checked="" type="checkbox"/> |   |
| 1 | T  | 102.05                              | -                                   | 9 |
| 2 | P  | 199.11                              | 977.42                              | 8 |
| 3 | G  | 256.13                              | 880.37                              | 7 |
| 4 | M  | 387.17                              | 823.34                              | 6 |
| 5 | C  | 547.20                              | 692.30                              | 5 |
| 6 | E  | 676.24                              | 532.27                              | 4 |
| 7 | L  | 789.33                              | 403.23                              | 3 |
| 8 | D  | 904.35                              | 290.15                              | 2 |
| 9 | R  | -                                   | 175.12                              | 1 |

gi|70885011|gb|EAN97847.1| hypothetical protein, conserved [Trypanosoma cruzi]

R.AVVDSEETPGYIR.E

M+H=1695.822388

DeltaM=0.63274

z=2

P(pep)=0.000100413

Xcorr=3.08

DCn=0.41

#3333-3333 NL: 2.46E2

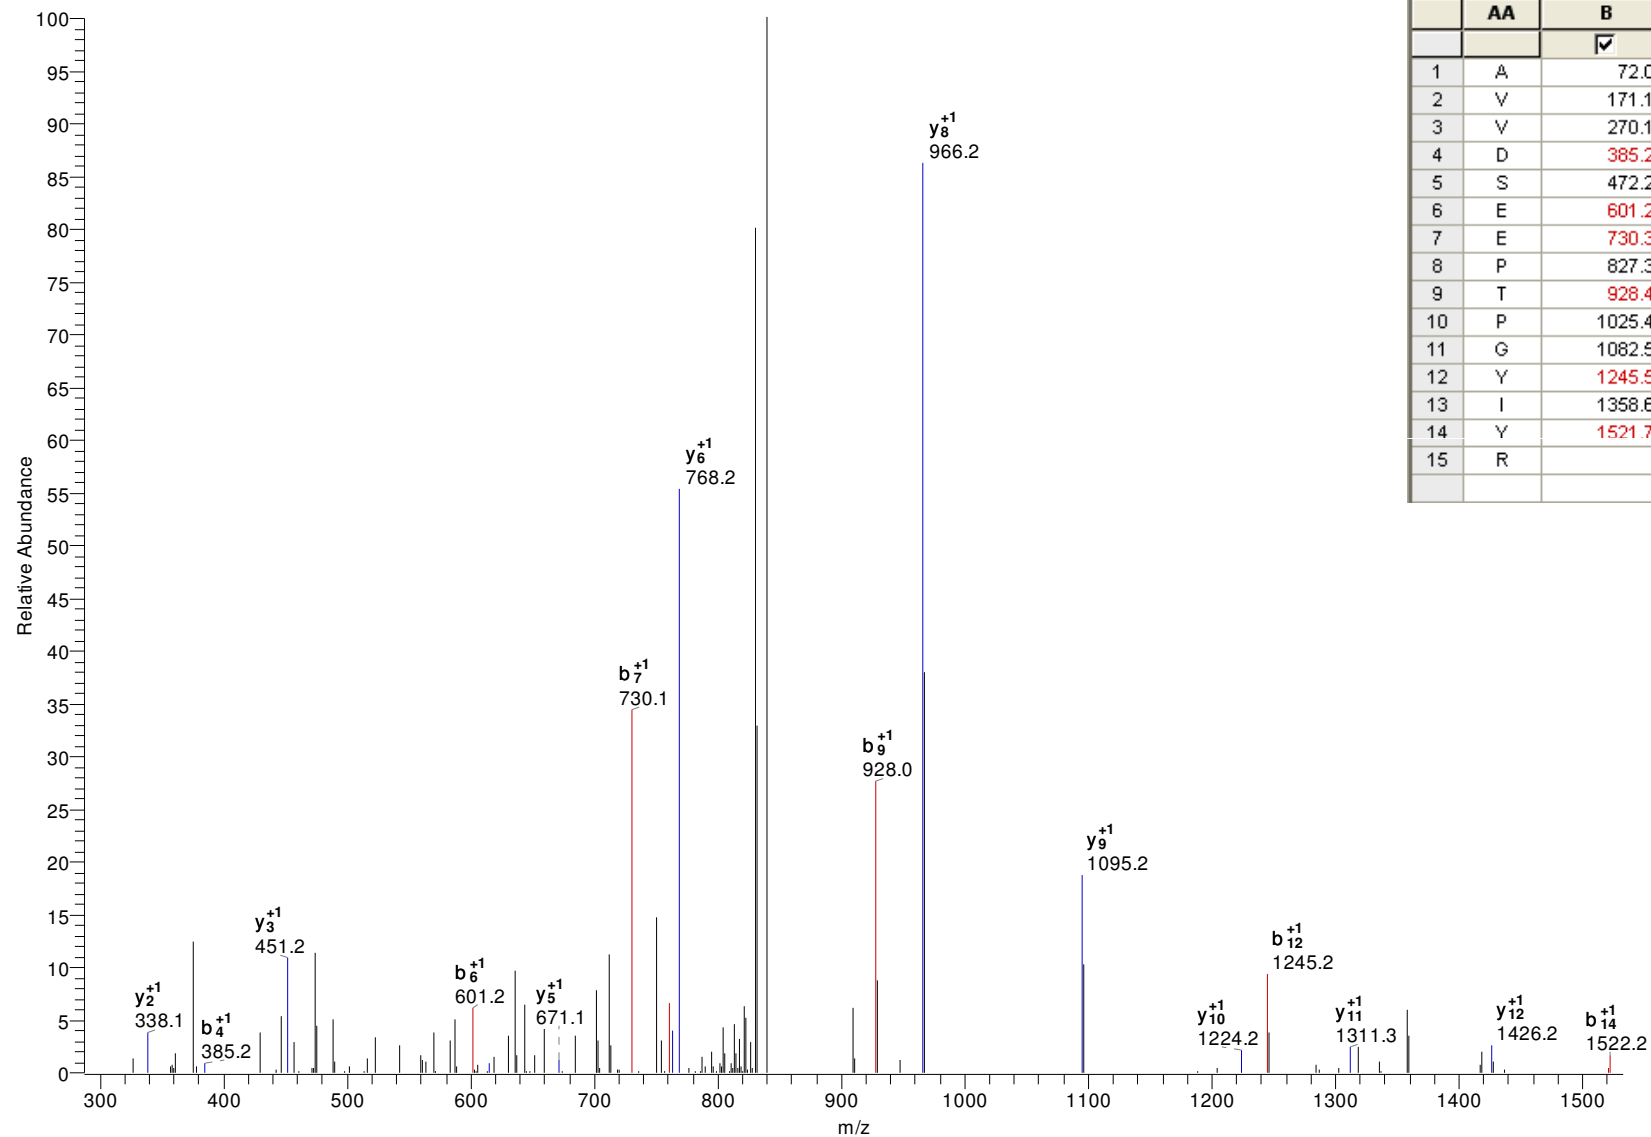

|    | AA | B                                   | Y                                   |    |
|----|----|-------------------------------------|-------------------------------------|----|
|    |    | <input checked="" type="checkbox"/> | <input checked="" type="checkbox"/> |    |
| 1  | A  | 72.04                               | -                                   | 15 |
| 2  | V  | 171.11                              | 1624.79                             | 14 |
| 3  | V  | 270.18                              | 1525.72                             | 13 |
| 4  | D  | 385.21                              | 1426.65                             | 12 |
| 5  | S  | 472.24                              | 1311.62                             | 11 |
| 6  | E  | 601.28                              | 1224.59                             | 10 |
| 7  | E  | 730.33                              | 1095.55                             | 9  |
| 8  | P  | 827.38                              | 966.50                              | 8  |
| 9  | T  | 928.43                              | 869.45                              | 7  |
| 10 | P  | 1025.48                             | 768.40                              | 6  |
| 11 | G  | 1082.50                             | 671.35                              | 5  |
| 12 | Y  | 1245.56                             | 614.33                              | 4  |
| 13 | I  | 1358.65                             | 451.27                              | 3  |
| 14 | Y  | 1521.71                             | 338.18                              | 2  |
| 15 | R  | -                                   | 175.12                              | 1  |

gi|70867597|gb|EAN82710.1| glutamamyl carboxypeptidase, putative [Trypanosoma cruzi]

R.DETPSFEGSEEAPITK.L

M+H=1736.786133

DeltaM=1.65288

z=2

P(pep)=8.63E-08

Xcorr=3.08

DCn=0.43

#2855-2855 NL: 4.61E2

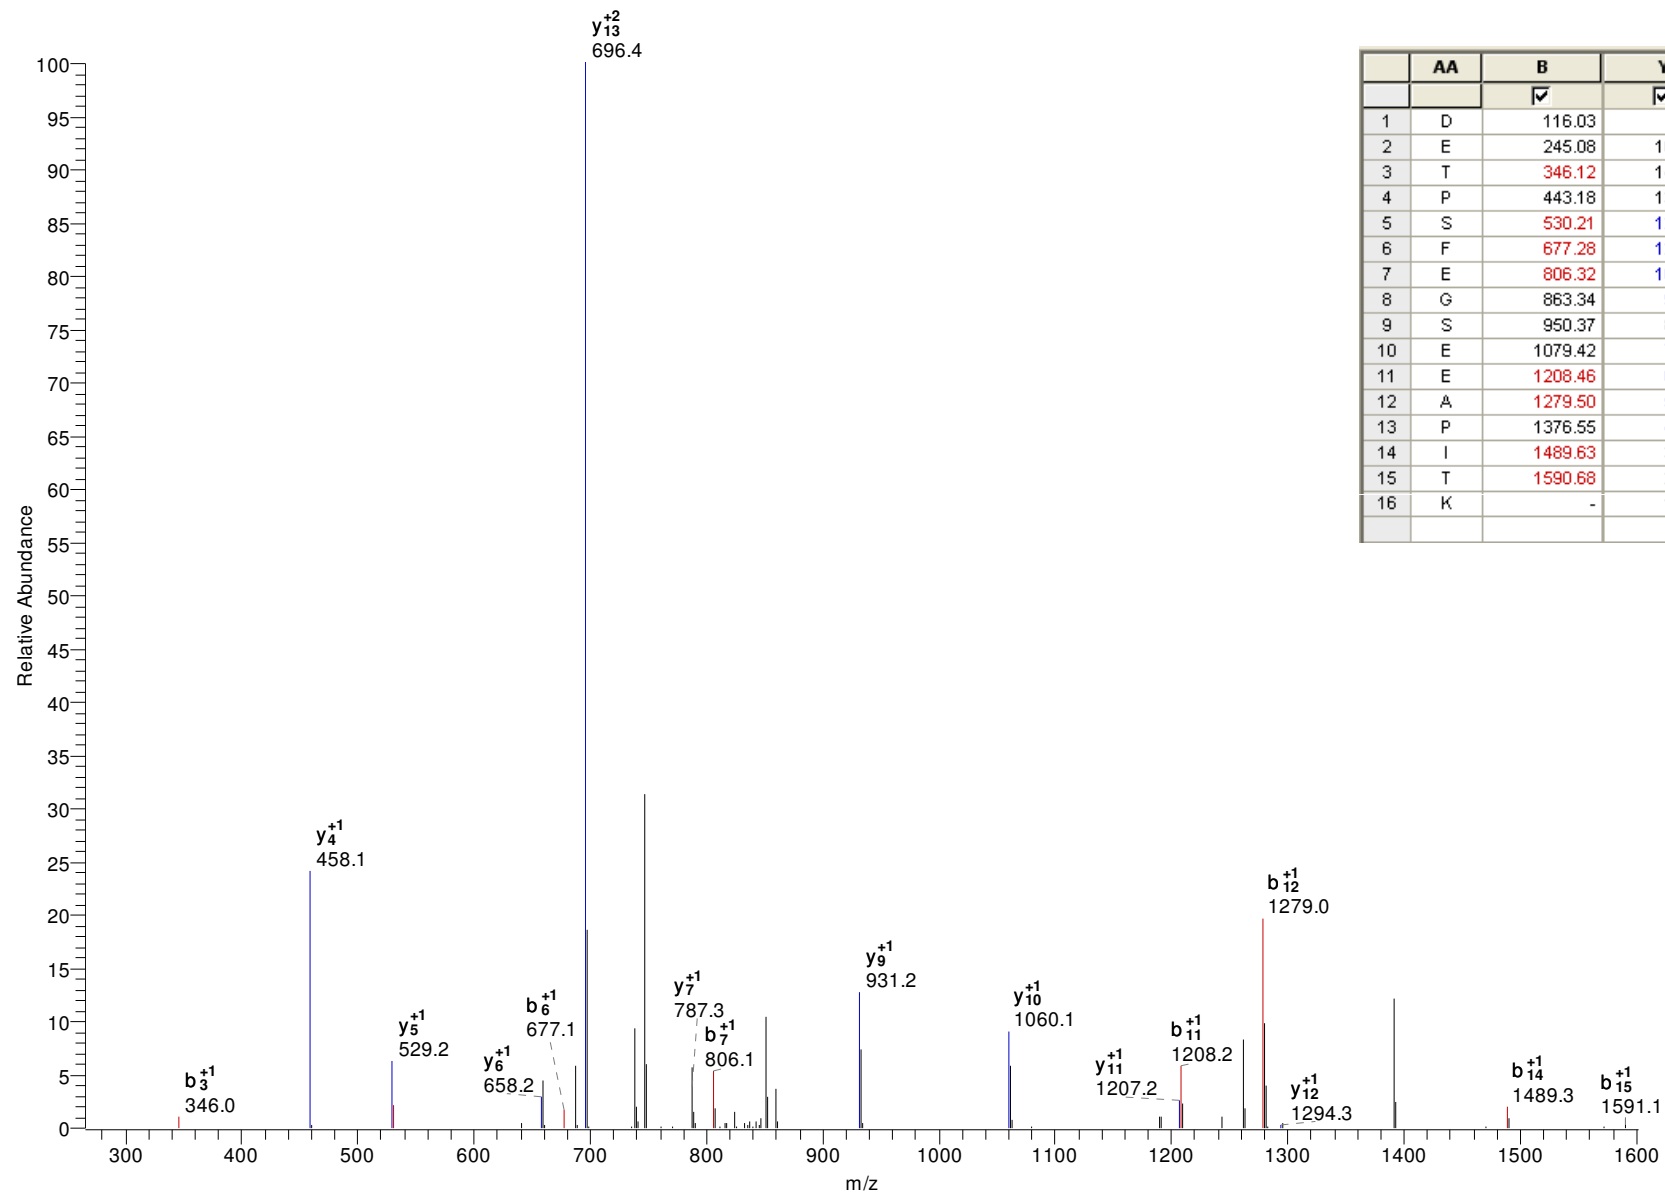

|    | AA | B                                   | Y                                   |    |
|----|----|-------------------------------------|-------------------------------------|----|
|    |    | <input checked="" type="checkbox"/> | <input checked="" type="checkbox"/> |    |
| 1  | D  | 116.03                              | -                                   | 16 |
| 2  | E  | 245.08                              | 1621.76                             | 15 |
| 3  | T  | 346.12                              | 1492.72                             | 14 |
| 4  | P  | 443.18                              | 1391.67                             | 13 |
| 5  | S  | 530.21                              | 1294.62                             | 12 |
| 6  | F  | 677.28                              | 1207.58                             | 11 |
| 7  | E  | 806.32                              | 1060.52                             | 10 |
| 8  | G  | 863.34                              | 931.47                              | 9  |
| 9  | S  | 950.37                              | 874.45                              | 8  |
| 10 | E  | 1079.42                             | 787.42                              | 7  |
| 11 | E  | 1208.46                             | 658.38                              | 6  |
| 12 | A  | 1279.50                             | 529.33                              | 5  |
| 13 | P  | 1376.55                             | 458.30                              | 4  |
| 14 | I  | 1489.63                             | 361.24                              | 3  |
| 15 | T  | 1590.68                             | 248.16                              | 2  |
| 16 | K  | -                                   | 147.11                              | 1  |



gi|70874988|gb|EAN88605.1| acetylornithine deacetylase-like, putative [Trypanosoma cruzi]

K.WSDPFTLTER.D

M+H=1366.627319

DeltaM=1.16545

z=2

P(pep)=1.93E-05

Xcorr=3.06

DCn=0.49

#4423-4423 NL: 1.78E2

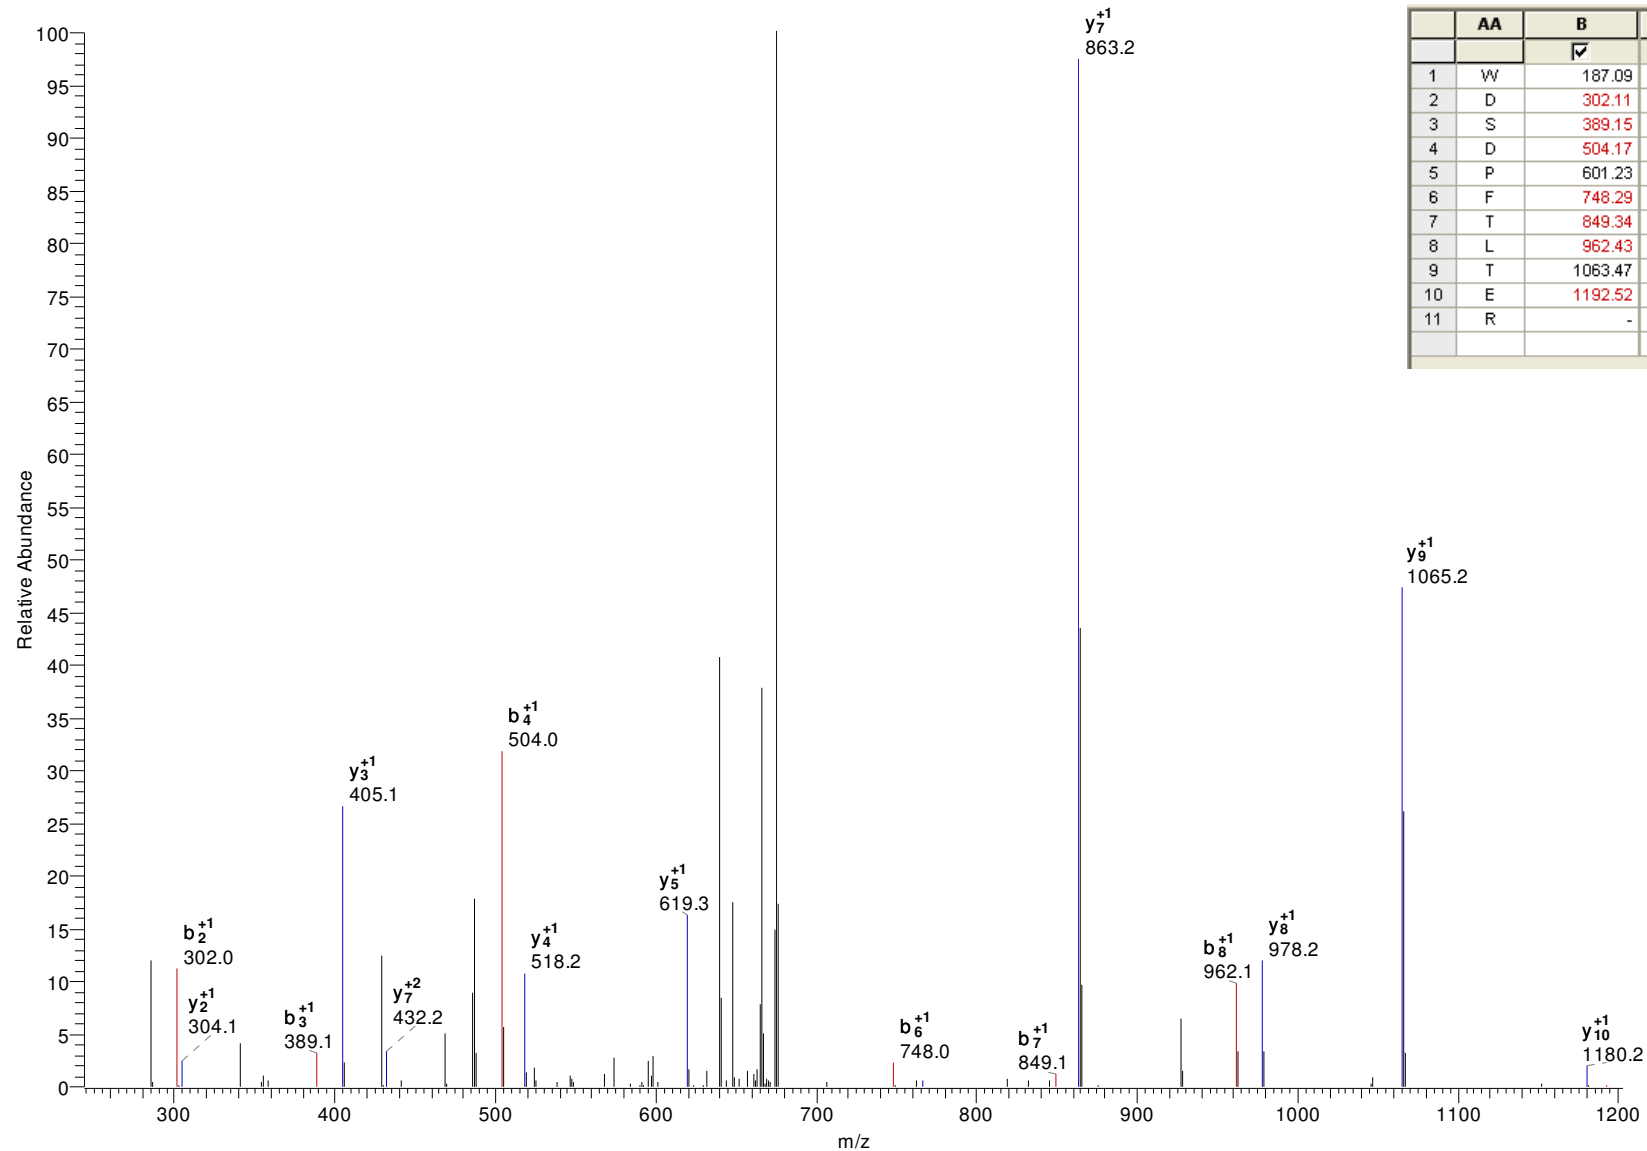

|    | AA | B                                   | Y                                   |    |
|----|----|-------------------------------------|-------------------------------------|----|
|    |    | <input checked="" type="checkbox"/> | <input checked="" type="checkbox"/> |    |
| 1  | W  | 187.09                              | -                                   | 11 |
| 2  | D  | 302.11                              | 1180.55                             | 10 |
| 3  | S  | 389.15                              | 1065.52                             | 9  |
| 4  | D  | 504.17                              | 978.49                              | 8  |
| 5  | P  | 601.23                              | 863.46                              | 7  |
| 6  | F  | 748.29                              | 766.41                              | 6  |
| 7  | T  | 849.34                              | 619.34                              | 5  |
| 8  | L  | 962.43                              | 518.29                              | 4  |
| 9  | T  | 1063.47                             | 405.21                              | 3  |
| 10 | E  | 1192.52                             | 304.16                              | 2  |
| 11 | R  | -                                   | 175.12                              | 1  |

gi|70885175|gb|EAN98004.1| procyclic form surface glycoprotein, putative [Trypanosoma cruzi]

R.LNCQCNELLNSFMNQCVASGGK.F

M+H=2544.109863

DeltaM=1.83799

z=3

P(pep)=7.63E-05

Xcorr=3.06

DCn=0.53

#4586-4586 NL: 4.25E1

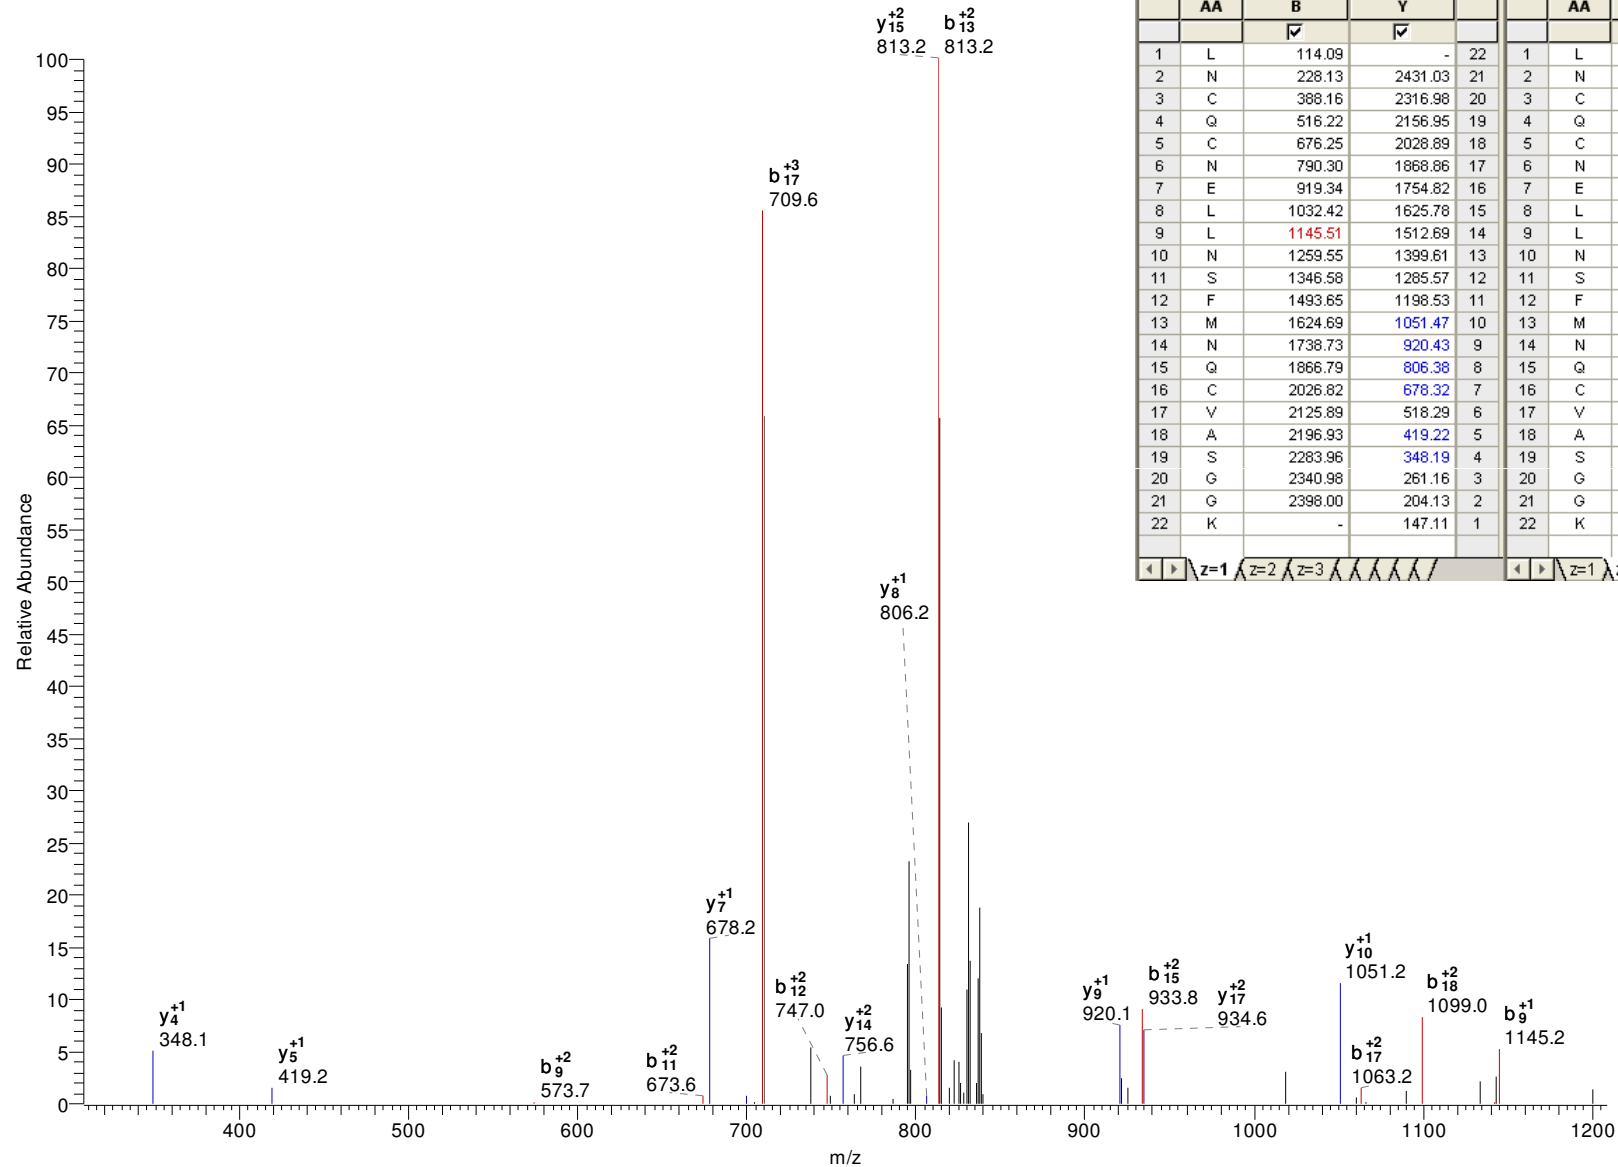

|    | AA | B       | Y       |    |    | AA | B       | Y       |    |
|----|----|---------|---------|----|----|----|---------|---------|----|
|    |    | ✓       | ✓       |    |    |    | ✓       | ✓       |    |
| 1  | L  | 114.09  | -       | 22 | 1  | L  | 57.55   | -       | 22 |
| 2  | N  | 228.13  | 2431.03 | 21 | 2  | N  | 114.57  | 1216.02 | 21 |
| 3  | C  | 388.16  | 2316.98 | 20 | 3  | C  | 194.59  | 1159.00 | 20 |
| 4  | Q  | 516.22  | 2156.95 | 19 | 4  | Q  | 258.62  | 1078.98 | 19 |
| 5  | C  | 676.25  | 2028.89 | 18 | 5  | C  | 338.63  | 1014.95 | 18 |
| 6  | N  | 790.30  | 1868.86 | 17 | 6  | N  | 395.65  | 934.94  | 17 |
| 7  | E  | 919.34  | 1754.82 | 16 | 7  | E  | 460.17  | 877.91  | 16 |
| 8  | L  | 1032.42 | 1625.78 | 15 | 8  | L  | 516.72  | 813.39  | 15 |
| 9  | L  | 1145.51 | 1512.69 | 14 | 9  | L  | 573.26  | 756.85  | 14 |
| 10 | N  | 1259.55 | 1399.61 | 13 | 10 | N  | 630.28  | 700.31  | 13 |
| 11 | S  | 1346.58 | 1285.57 | 12 | 11 | S  | 673.80  | 643.29  | 12 |
| 12 | F  | 1493.65 | 1198.53 | 11 | 12 | F  | 747.33  | 599.77  | 11 |
| 13 | M  | 1624.69 | 1051.47 | 10 | 13 | M  | 812.85  | 526.24  | 10 |
| 14 | N  | 1738.73 | 920.43  | 9  | 14 | N  | 869.87  | 460.72  | 9  |
| 15 | Q  | 1866.79 | 806.38  | 8  | 15 | Q  | 933.90  | 403.69  | 8  |
| 16 | C  | 2026.82 | 678.32  | 7  | 16 | C  | 1013.92 | 339.67  | 7  |
| 17 | V  | 2125.89 | 518.29  | 6  | 17 | V  | 1063.45 | 259.65  | 6  |
| 18 | A  | 2196.93 | 419.22  | 5  | 18 | A  | 1098.97 | 210.12  | 5  |
| 19 | S  | 2283.96 | 348.19  | 4  | 19 | S  | 1142.48 | 174.60  | 4  |
| 20 | G  | 2340.98 | 261.16  | 3  | 20 | G  | 1171.00 | 131.08  | 3  |
| 21 | G  | 2398.00 | 204.13  | 2  | 21 | G  | 1199.51 | 102.57  | 2  |
| 22 | K  | -       | 147.11  | 1  | 22 | K  | -       | 74.06   | 1  |

gi|70882340|gb|EAN95315.1| hypothetical protein, conserved [Trypanosoma cruzi]  
K.EAPIGGWCPYSSCTTQK.C M+H=1941.847046 DeltaM=1.95818 z=2  
P(pep)=2.66E-07 Xcorr=3.05 DCn=0.48

#3565-3565 NL: 5.75E2

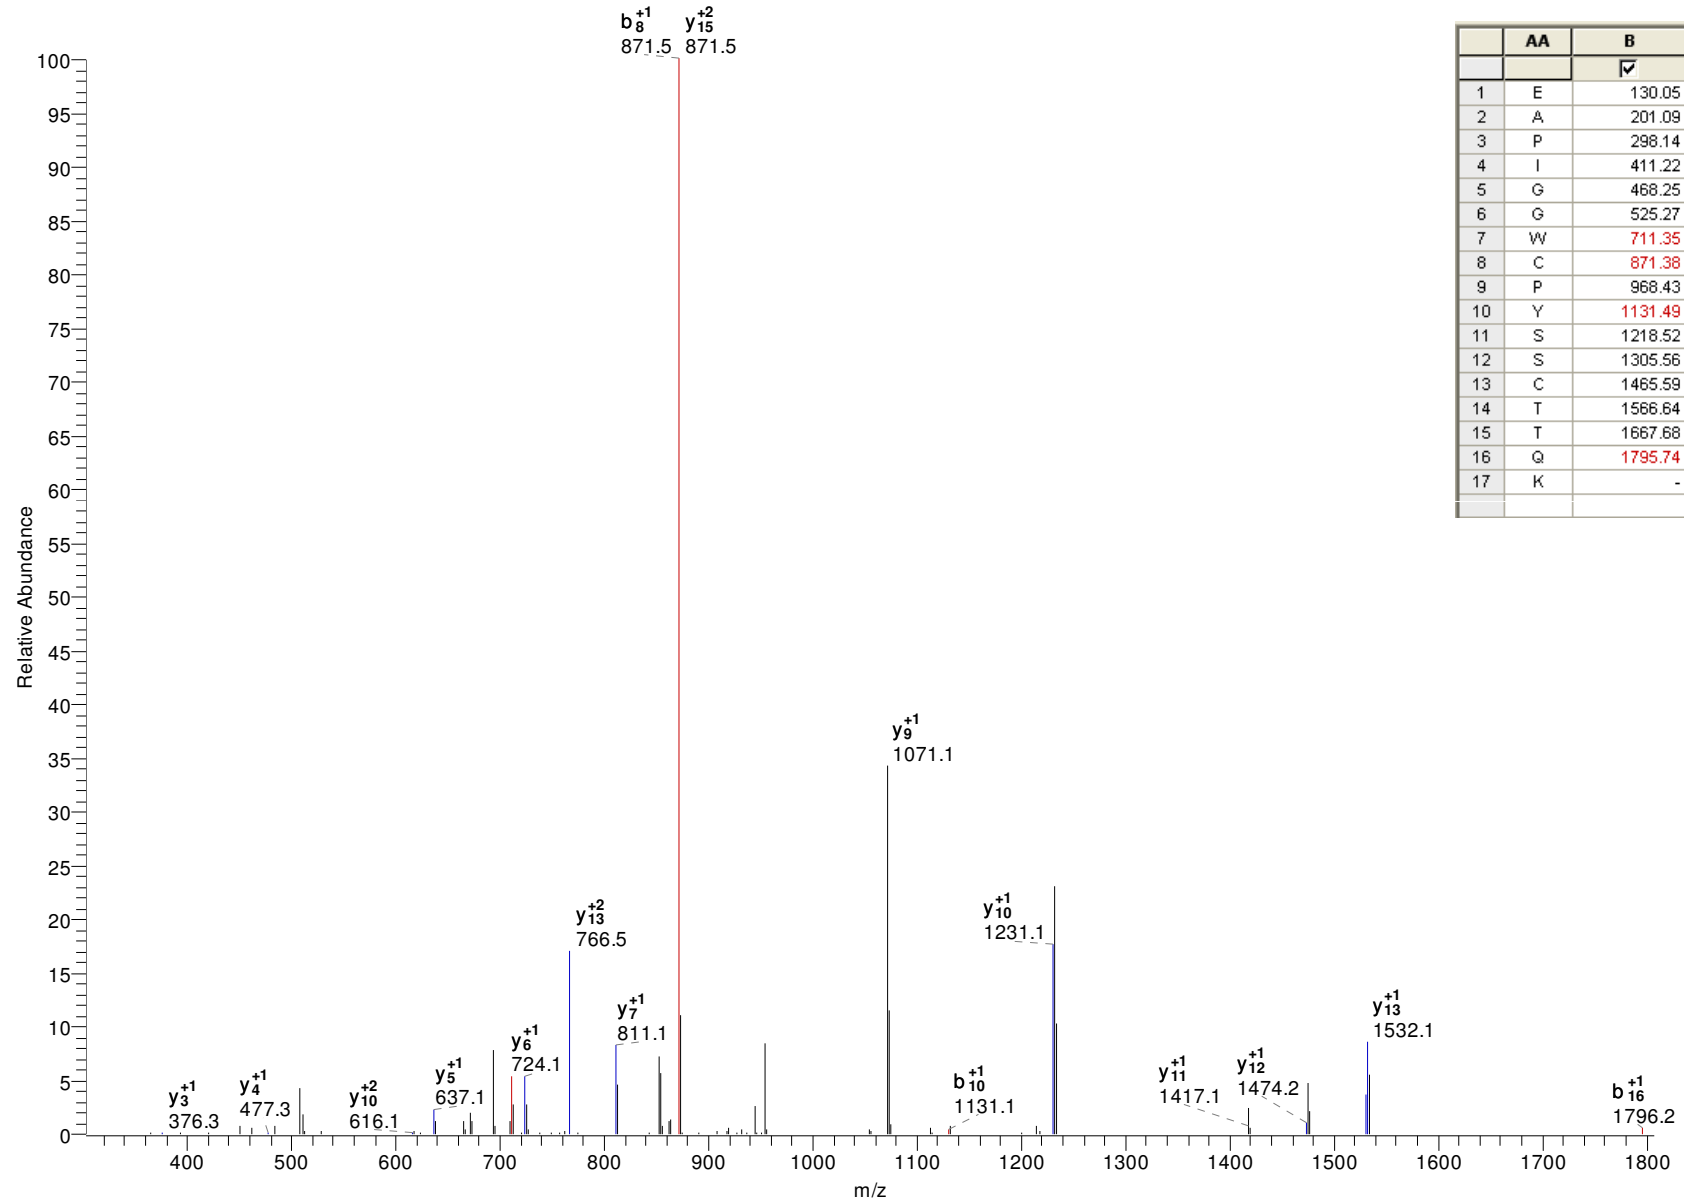

|    | AA | B       | Y       |    |
|----|----|---------|---------|----|
|    |    | ✓       | ✓       |    |
| 1  | E  | 130.05  | -       | 17 |
| 2  | A  | 201.09  | 1812.80 | 16 |
| 3  | P  | 298.14  | 1741.77 | 15 |
| 4  | I  | 411.22  | 1644.71 | 14 |
| 5  | G  | 468.25  | 1531.63 | 13 |
| 6  | G  | 525.27  | 1474.61 | 12 |
| 7  | W  | 711.35  | 1417.59 | 11 |
| 8  | C  | 871.38  | 1231.51 | 10 |
| 9  | P  | 968.43  | 1071.48 | 9  |
| 10 | Y  | 1131.49 | 974.42  | 8  |
| 11 | S  | 1218.52 | 811.36  | 7  |
| 12 | S  | 1305.56 | 724.33  | 6  |
| 13 | C  | 1465.59 | 637.30  | 5  |
| 14 | T  | 1566.64 | 477.27  | 4  |
| 15 | T  | 1667.68 | 376.22  | 3  |
| 16 | Q  | 1795.74 | 275.17  | 2  |
| 17 | K  | -       | 147.11  | 1  |

gi|19401140|gb|AAL87542.1|AF254412\_2 proton motive P-type ATPase 2 [Trypanosoma cruzi]  
 -.VDVNDLPDDLGEK.- M+H=1428.685303 DeltaM=1.10576 z=2  
 P(pep)=1.79E-05 Xcorr=3.05 DCn=0.42

#3478-3478 NL:2.14E2

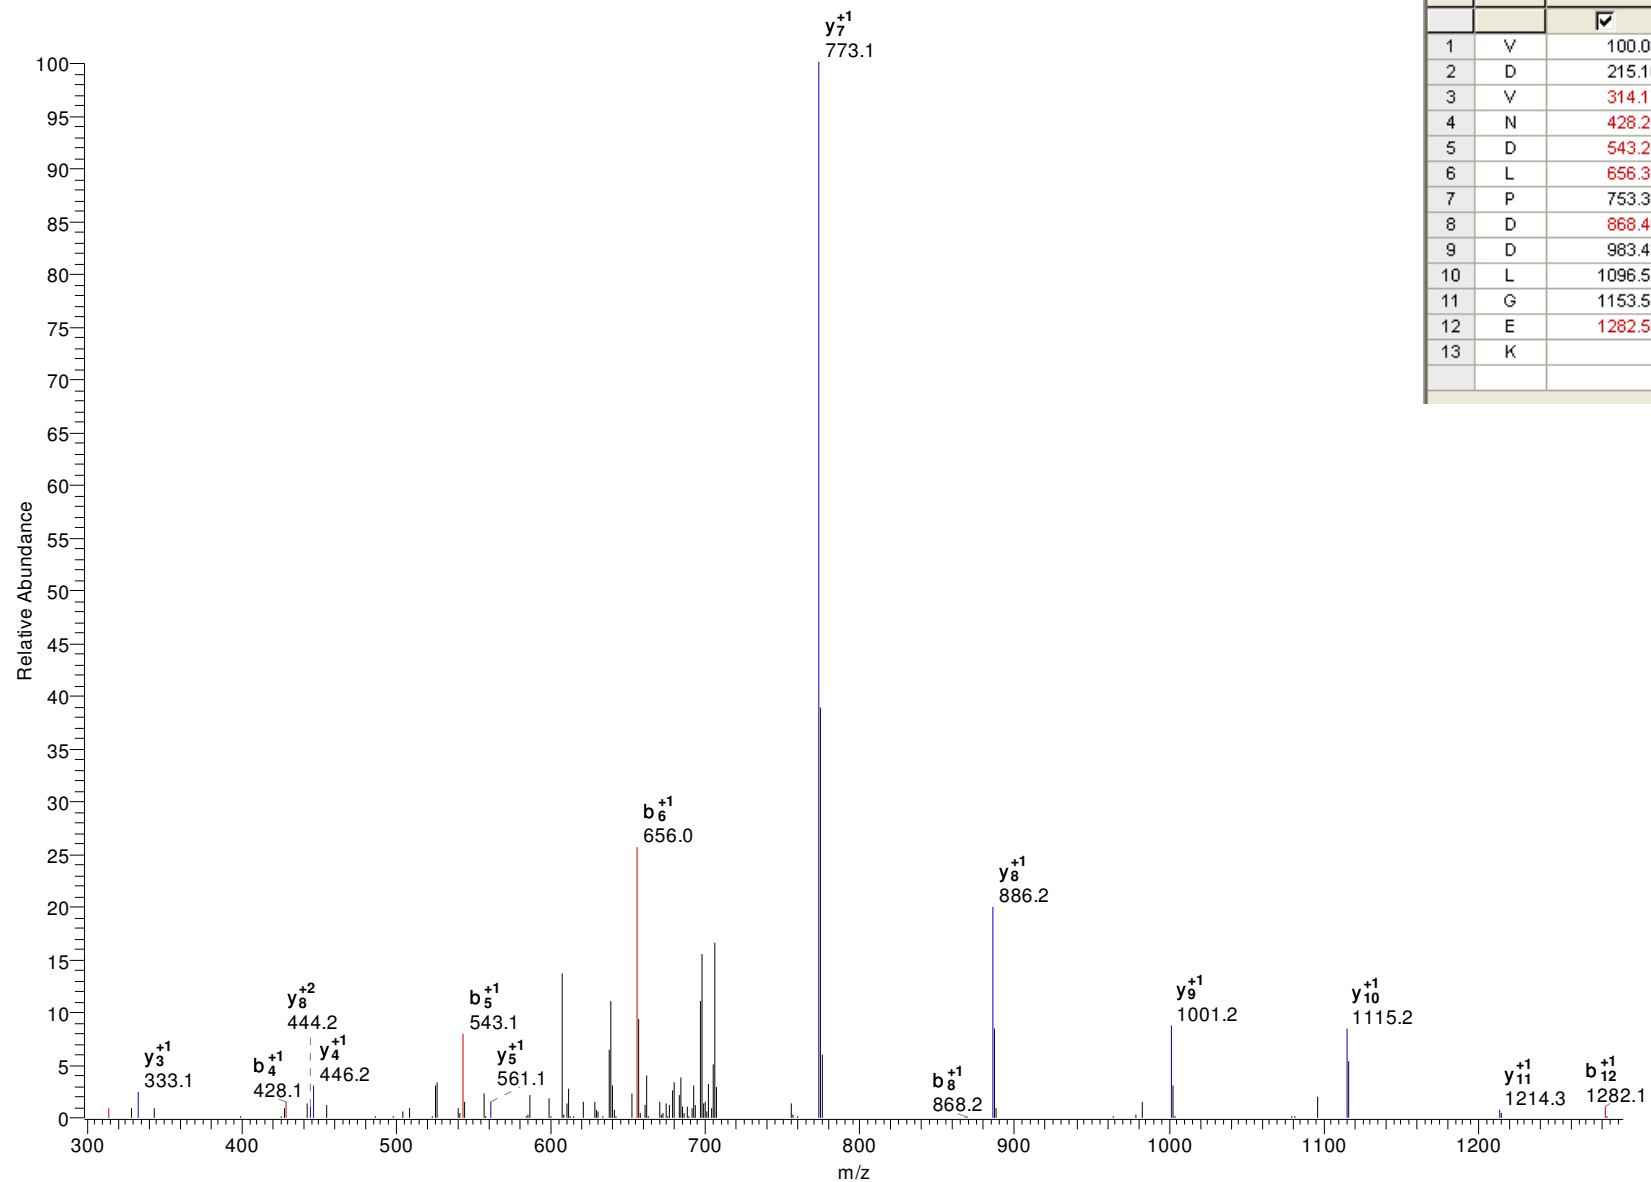

|    | AA | B                                   | Y                                   |    |
|----|----|-------------------------------------|-------------------------------------|----|
|    |    | <input checked="" type="checkbox"/> | <input checked="" type="checkbox"/> |    |
| 1  | V  | 100.08                              | -                                   | 13 |
| 2  | D  | 215.10                              | 1329.62                             | 12 |
| 3  | V  | 314.17                              | 1214.59                             | 11 |
| 4  | N  | 428.21                              | 1115.52                             | 10 |
| 5  | D  | 543.24                              | 1001.48                             | 9  |
| 6  | L  | 656.32                              | 886.45                              | 8  |
| 7  | P  | 753.38                              | 773.37                              | 7  |
| 8  | D  | 868.40                              | 676.31                              | 6  |
| 9  | D  | 983.43                              | 561.29                              | 5  |
| 10 | L  | 1096.52                             | 446.26                              | 4  |
| 11 | G  | 1153.54                             | 333.18                              | 3  |
| 12 | E  | 1282.58                             | 276.16                              | 2  |
| 13 | K  | -                                   | 147.11                              | 1  |

gi|70876223|gb|EAN89698.1| heat shock 70 kDa protein, putative [Trypanosoma cruzi]

K.TFFPEEISAMVLSK.M

M+H=1598.813477

DeltaM=0.83977

z=2

P(pep)=0.000138669

Xcorr=2.94

DCn=0.52

#6111-6111 NL: 1.31E2

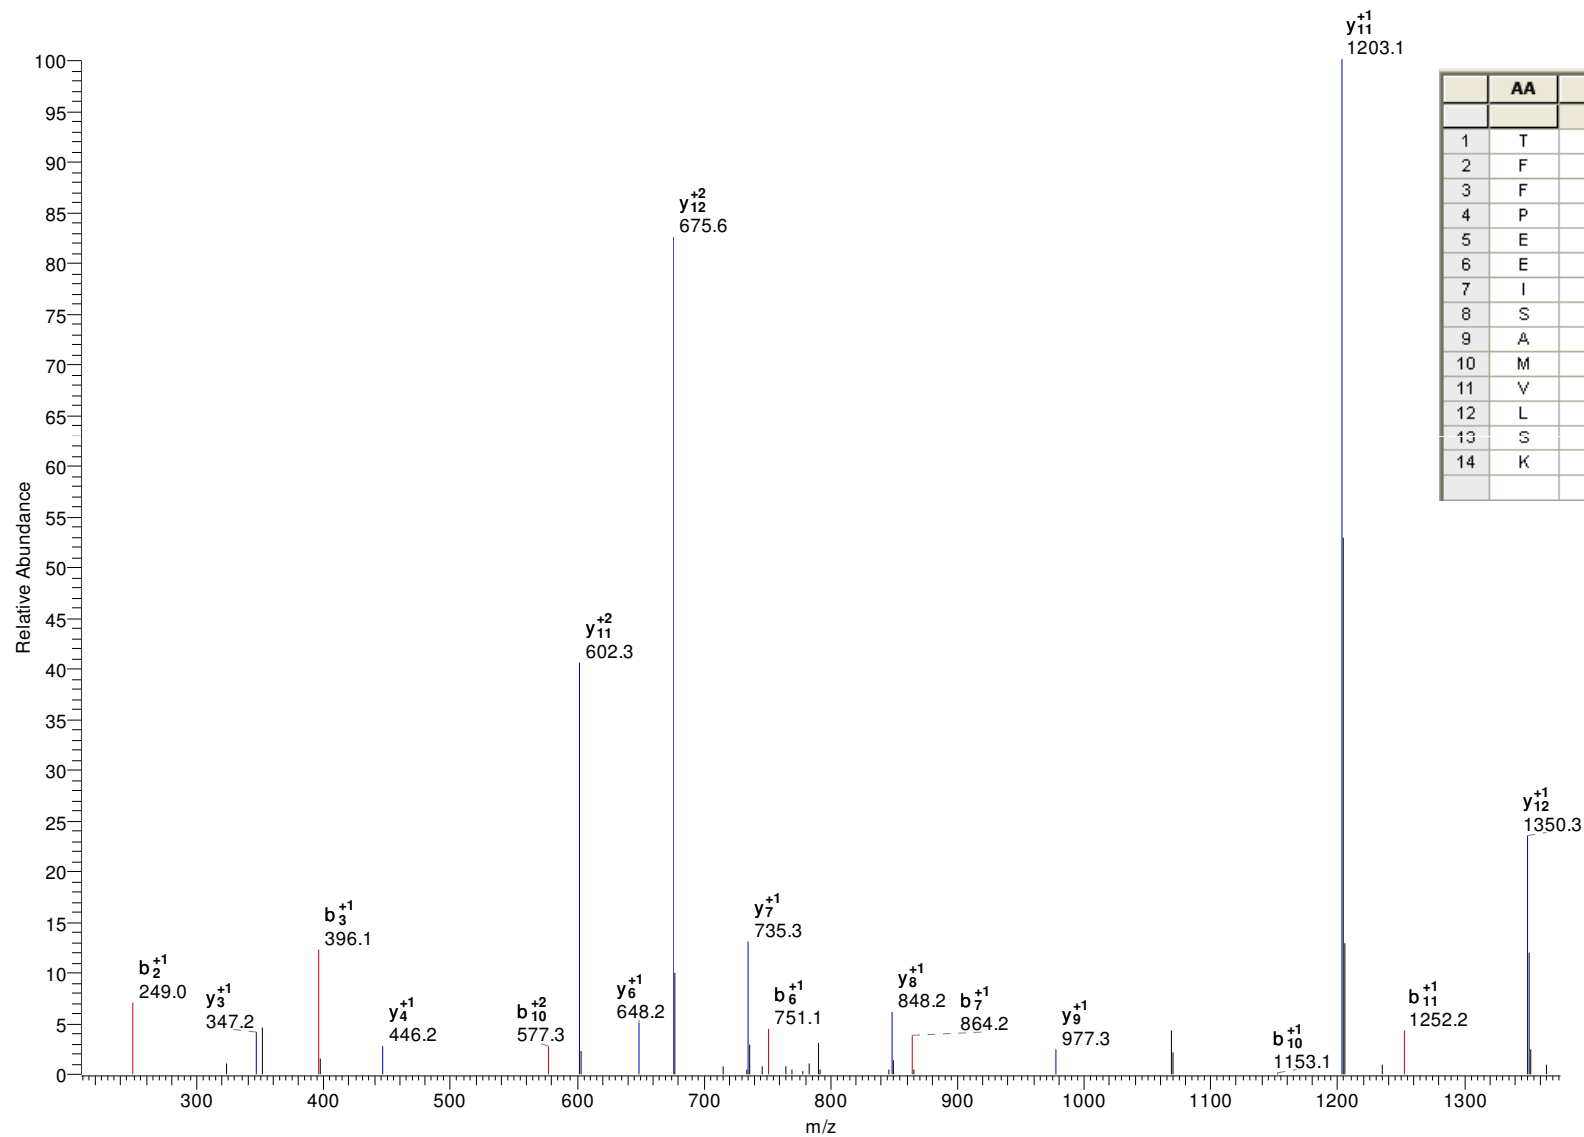

|    | AA | B       | Y       |    |
|----|----|---------|---------|----|
|    |    | ✓       | ✓       |    |
| 1  | T  | 102.05  | -       | 14 |
| 2  | F  | 249.12  | 1497.77 | 13 |
| 3  | F  | 396.19  | 1350.70 | 12 |
| 4  | P  | 493.24  | 1203.63 | 11 |
| 5  | E  | 622.29  | 1106.58 | 10 |
| 6  | E  | 751.33  | 977.53  | 9  |
| 7  | I  | 864.41  | 848.49  | 8  |
| 8  | S  | 951.45  | 735.41  | 7  |
| 9  | A  | 1022.48 | 648.37  | 6  |
| 10 | M  | 1153.52 | 577.34  | 5  |
| 11 | V  | 1252.59 | 446.30  | 4  |
| 12 | L  | 1365.68 | 347.23  | 3  |
| 13 | S  | 1452.71 | 234.14  | 2  |
| 14 | K  | -       | 147.11  | 1  |

gi|70869771|gb|EAN84271.1| glutamate dehydrogenase, putative [Trypanosoma cruzi]

R.ANILASDVFK.N

M+H=1077.593872

DeltaM=1.79509

z=2

P(pep)=0.000111701

Xcorr=2.94

DCn=0.38

#4010-4010 NL: 3.11E2

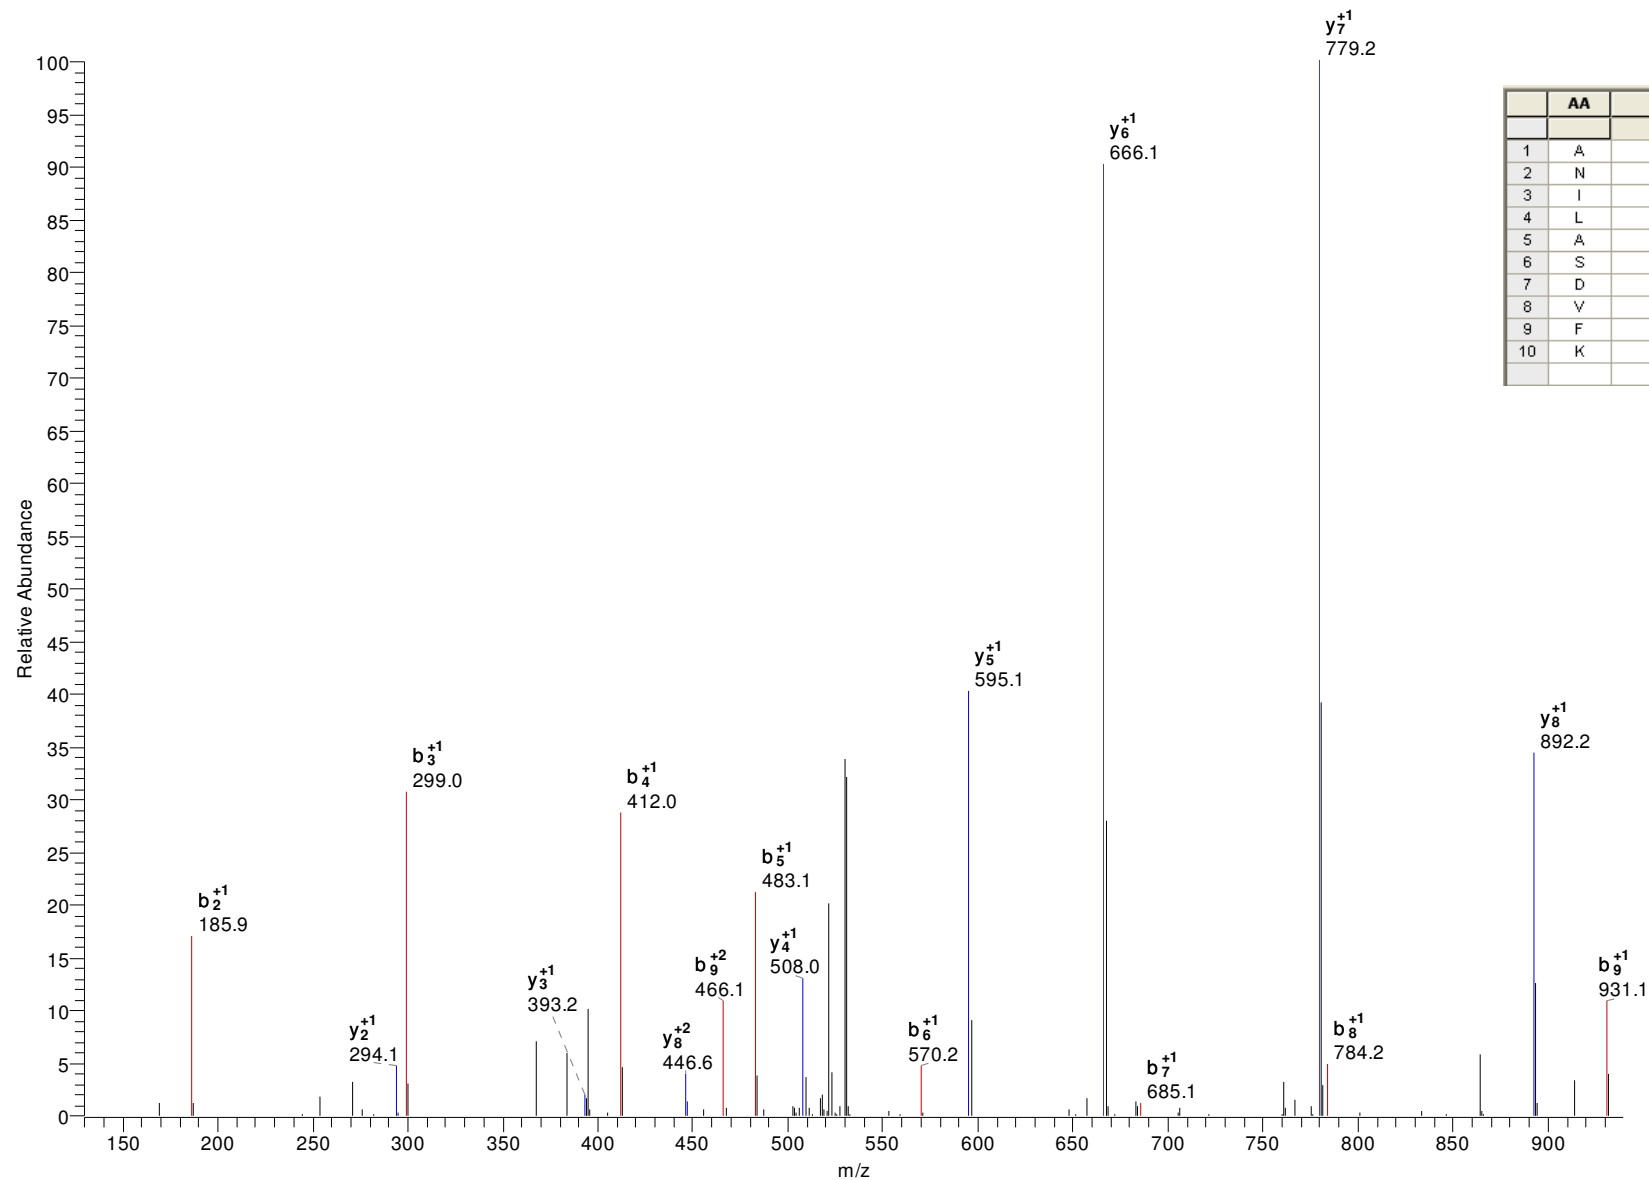

|    | AA | B      | Y       |    |
|----|----|--------|---------|----|
|    |    | ✓      | ✓       |    |
| 1  | A  | 72.04  | -       | 10 |
| 2  | N  | 186.09 | 1006.56 | 9  |
| 3  | I  | 299.17 | 892.51  | 8  |
| 4  | L  | 412.26 | 779.43  | 7  |
| 5  | A  | 483.29 | 666.35  | 6  |
| 6  | S  | 570.32 | 595.31  | 5  |
| 7  | D  | 685.35 | 508.28  | 4  |
| 8  | V  | 784.42 | 393.25  | 3  |
| 9  | F  | 931.49 | 294.18  | 2  |
| 10 | K  | -      | 147.11  | 1  |

gi|70885675|gb|EAN98484.1| hypothetical protein, conserved [Trypanosoma cruzi]

K.DFQTIAAASSSLPIFWER.T

M+H=2039.023315

DeltaM=1.90032

z=2

P(pep)=0.000810671

Xcorr=2.91

DCn=0.50

#6425-6425 NL: 1.20E2

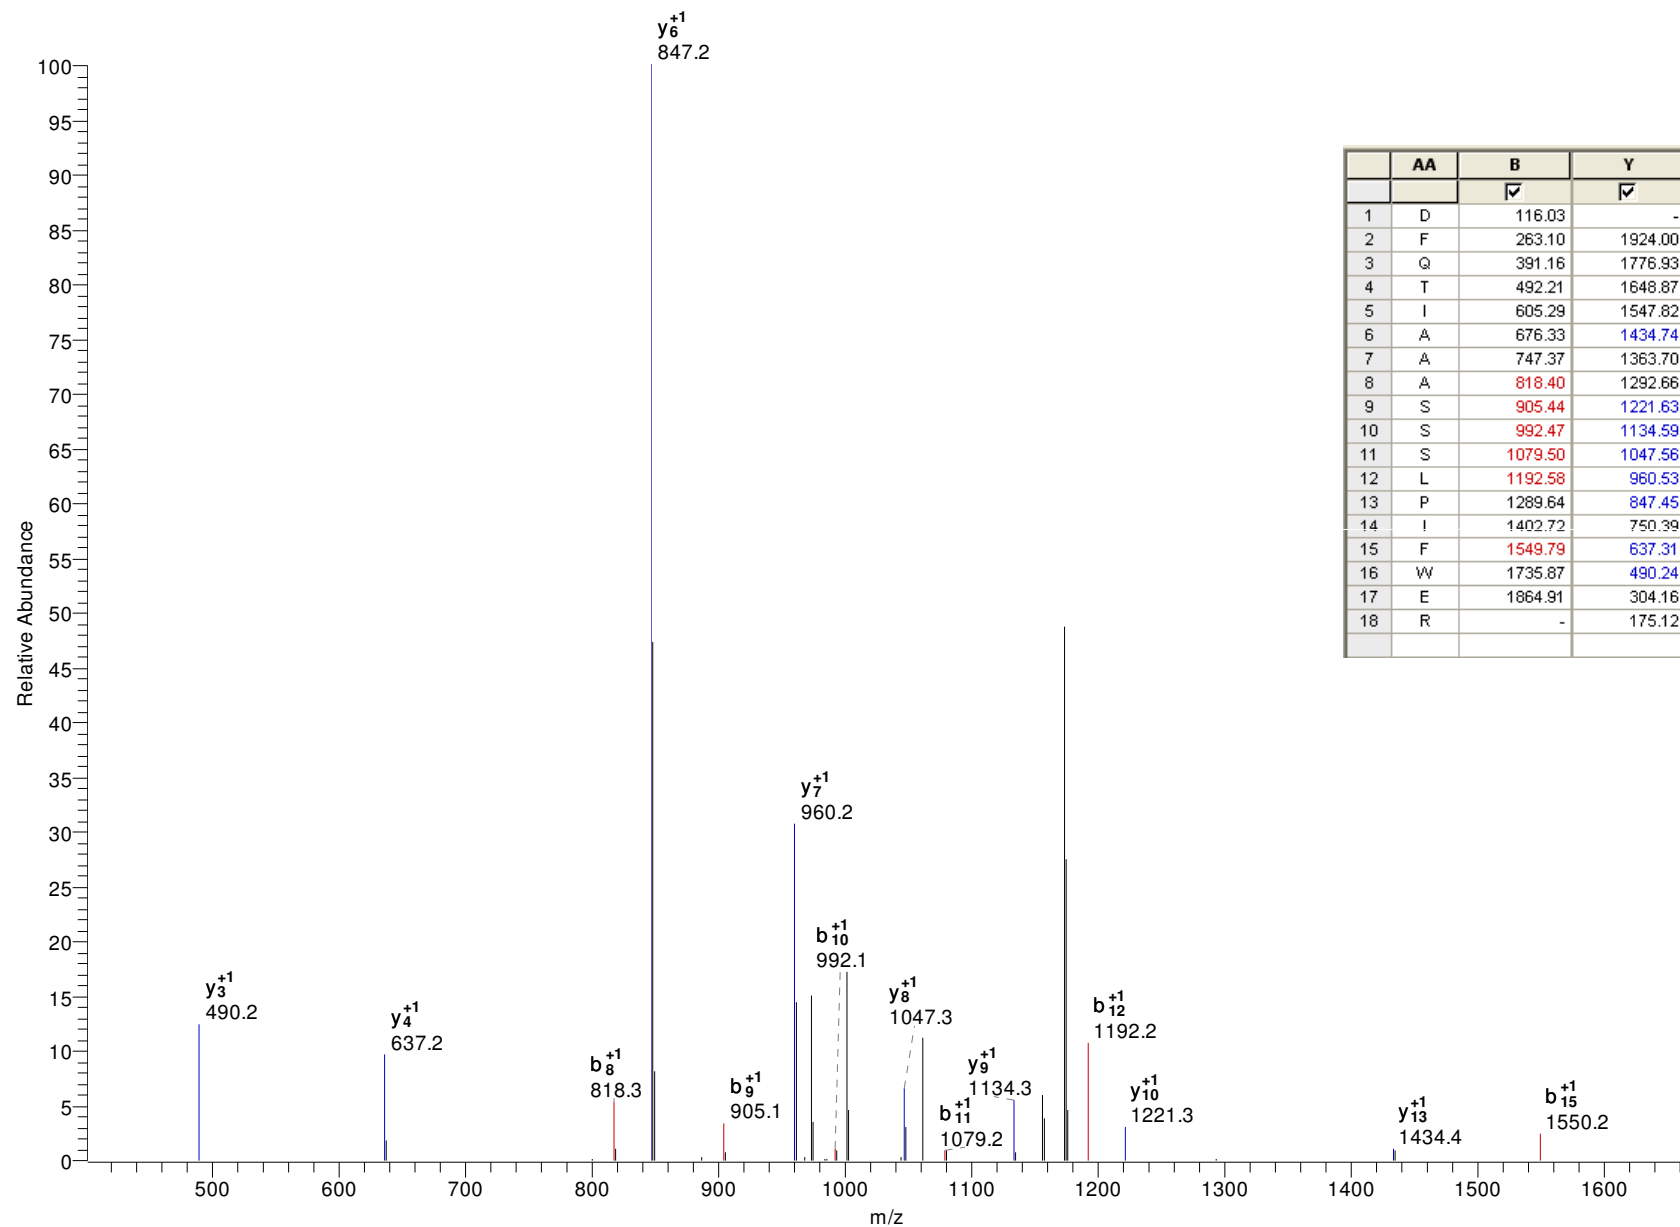

|    | AA | B       | Y       |    |
|----|----|---------|---------|----|
|    |    | ✓       | ✓       |    |
| 1  | D  | 116.03  | -       | 18 |
| 2  | F  | 263.10  | 1924.00 | 17 |
| 3  | Q  | 391.16  | 1776.93 | 16 |
| 4  | T  | 492.21  | 1648.87 | 15 |
| 5  | I  | 605.29  | 1547.82 | 14 |
| 6  | A  | 676.33  | 1434.74 | 13 |
| 7  | A  | 747.37  | 1363.70 | 12 |
| 8  | A  | 818.40  | 1292.66 | 11 |
| 9  | S  | 905.44  | 1221.63 | 10 |
| 10 | S  | 992.47  | 1134.59 | 9  |
| 11 | S  | 1079.50 | 1047.56 | 8  |
| 12 | L  | 1192.58 | 960.53  | 7  |
| 13 | P  | 1289.64 | 847.45  | 6  |
| 14 | I  | 1402.72 | 750.39  | 5  |
| 15 | F  | 1549.79 | 637.31  | 4  |
| 16 | W  | 1735.87 | 490.24  | 3  |
| 17 | E  | 1864.91 | 304.16  | 2  |
| 18 | R  | -       | 175.12  | 1  |

gi|70878249|gb|EAN91522.1| folate/pteridine transporter, putative [Trypanosoma cruzi]

-.ICDNIDVDGR.-  
P(pep)=4.75E-05

M+H=1176.531372  
Xcorr=2.85

DeltaM=1.91692  
DCn=0.44

z=2

#2476-2476 NL: 5.39E1

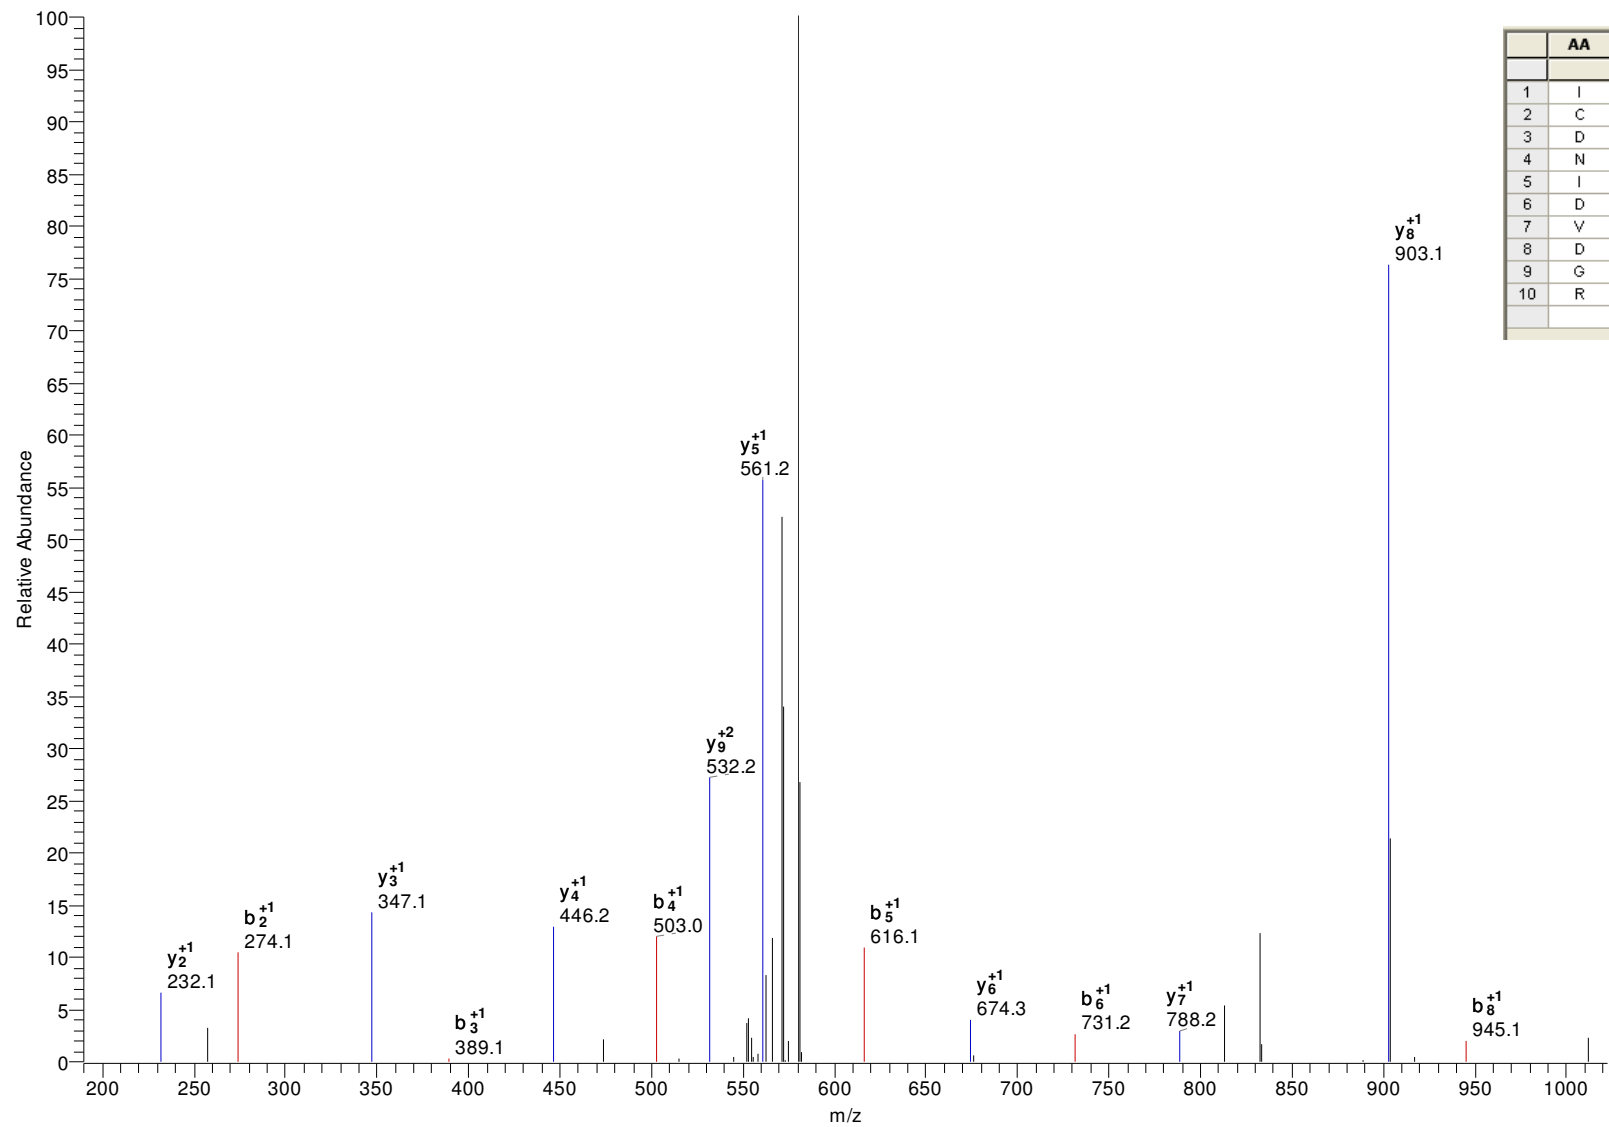

|    | AA | B       | Y       |    |
|----|----|---------|---------|----|
|    |    | ✓       | ✓       |    |
| 1  | I  | 114.09  | -       | 10 |
| 2  | C  | 274.12  | 1063.45 | 9  |
| 3  | D  | 389.15  | 903.42  | 8  |
| 4  | N  | 503.19  | 788.39  | 7  |
| 5  | I  | 616.28  | 674.35  | 6  |
| 6  | D  | 731.30  | 561.26  | 5  |
| 7  | V  | 830.37  | 446.24  | 4  |
| 8  | D  | 945.40  | 347.17  | 3  |
| 9  | G  | 1002.42 | 232.14  | 2  |
| 10 | R  | -       | 175.12  | 1  |



gi|19718723|gb|AAL96371.1|AC116314\_8 Tcc44h21-2.8 [Trypanosoma cruzi]

K.NAAAAAIDAIR.A

M+H=1056.57959

DeltaM=0.93511

z=2

P(pep)=0.000243589

Xcorr=2.85

DCn=0.32

#3328-3328 NL: 1.40E2

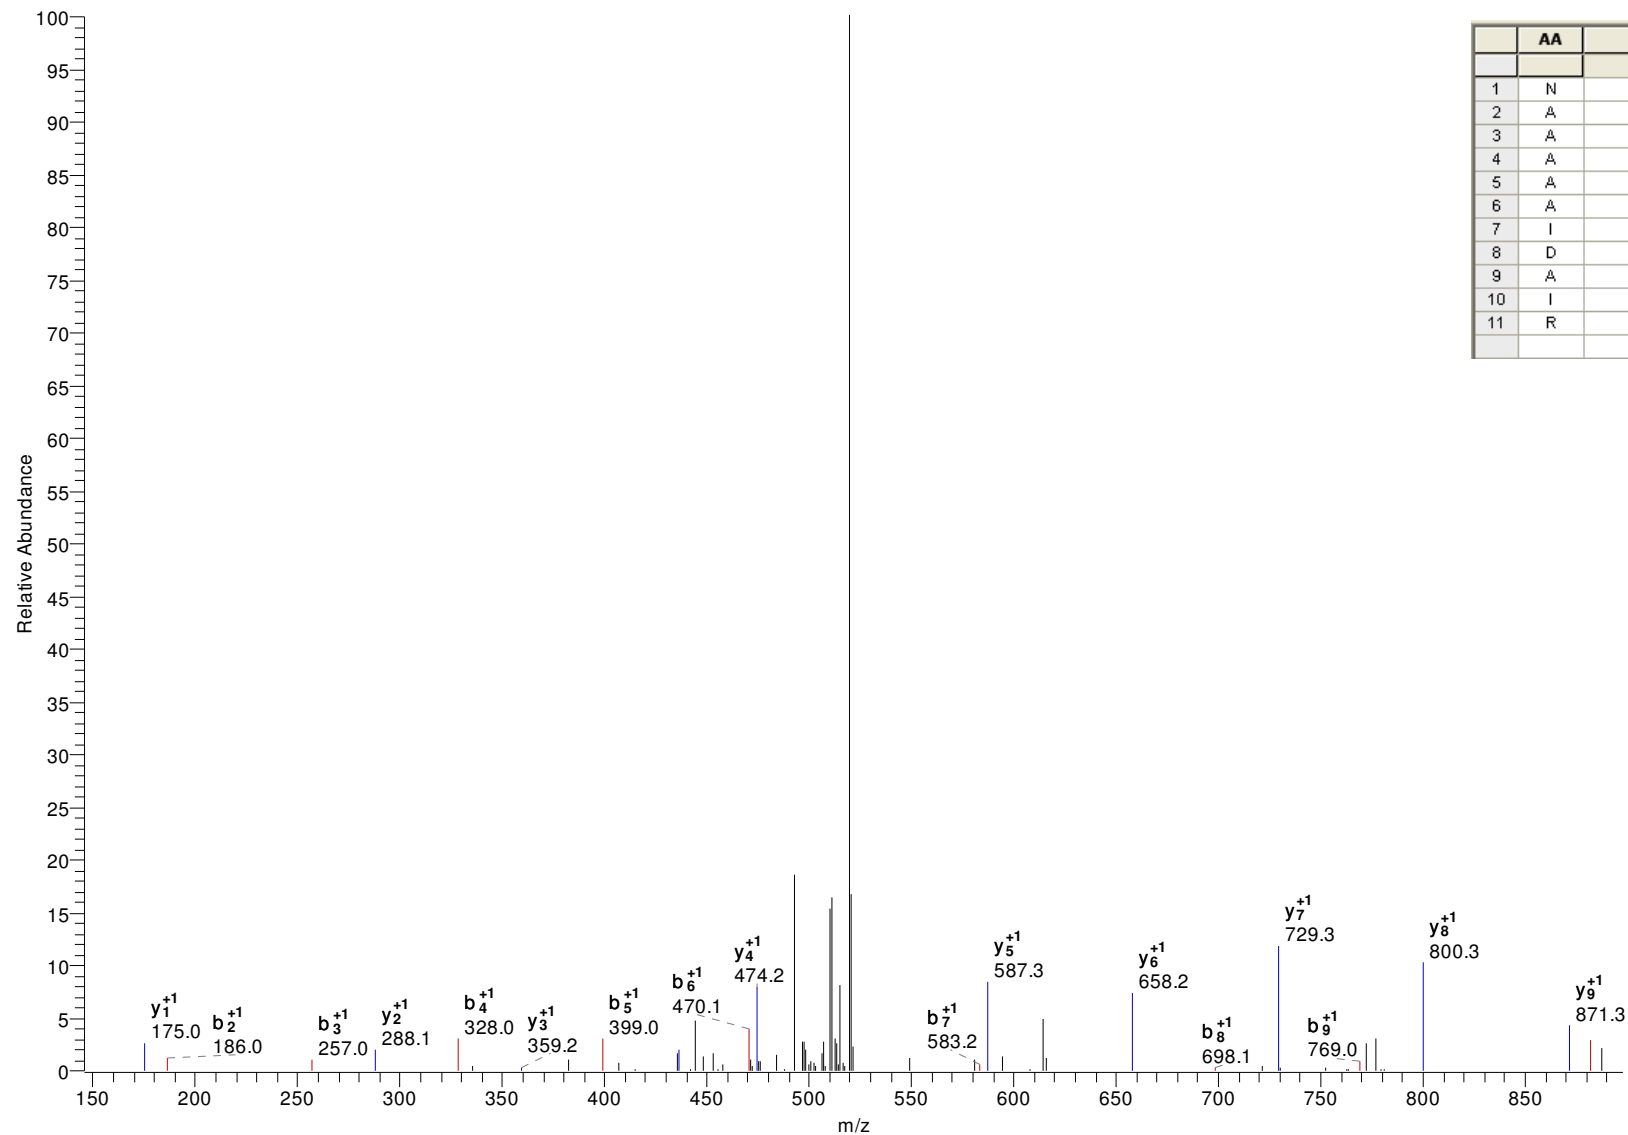

|    | AA | B                                   | Y                                   |    |
|----|----|-------------------------------------|-------------------------------------|----|
|    |    | <input checked="" type="checkbox"/> | <input checked="" type="checkbox"/> |    |
| 1  | N  | 115.05                              | -                                   | 11 |
| 2  | A  | 186.09                              | 942.54                              | 10 |
| 3  | A  | 257.12                              | 871.50                              | 9  |
| 4  | A  | 328.16                              | 800.46                              | 8  |
| 5  | A  | 399.20                              | 729.43                              | 7  |
| 6  | A  | 470.24                              | 658.39                              | 6  |
| 7  | I  | 583.32                              | 587.35                              | 5  |
| 8  | D  | 698.35                              | 474.27                              | 4  |
| 9  | A  | 769.38                              | 359.24                              | 3  |
| 10 | I  | 882.47                              | 288.20                              | 2  |
| 11 | R  | -                                   | 175.12                              | 1  |

gi|70887167|gb|EAN99928.1| sarcoplasmic reticulum glycoprotein, putative [Trypanosoma cruzi]

K.HIDAVLSELR.R

M+H=1152.637207

DeltaM=1.88738

z=2

P(pep)=4.77E-05

Xcorr=2.85

DCn=0.31

#3854-3854 NL: 1.24E2

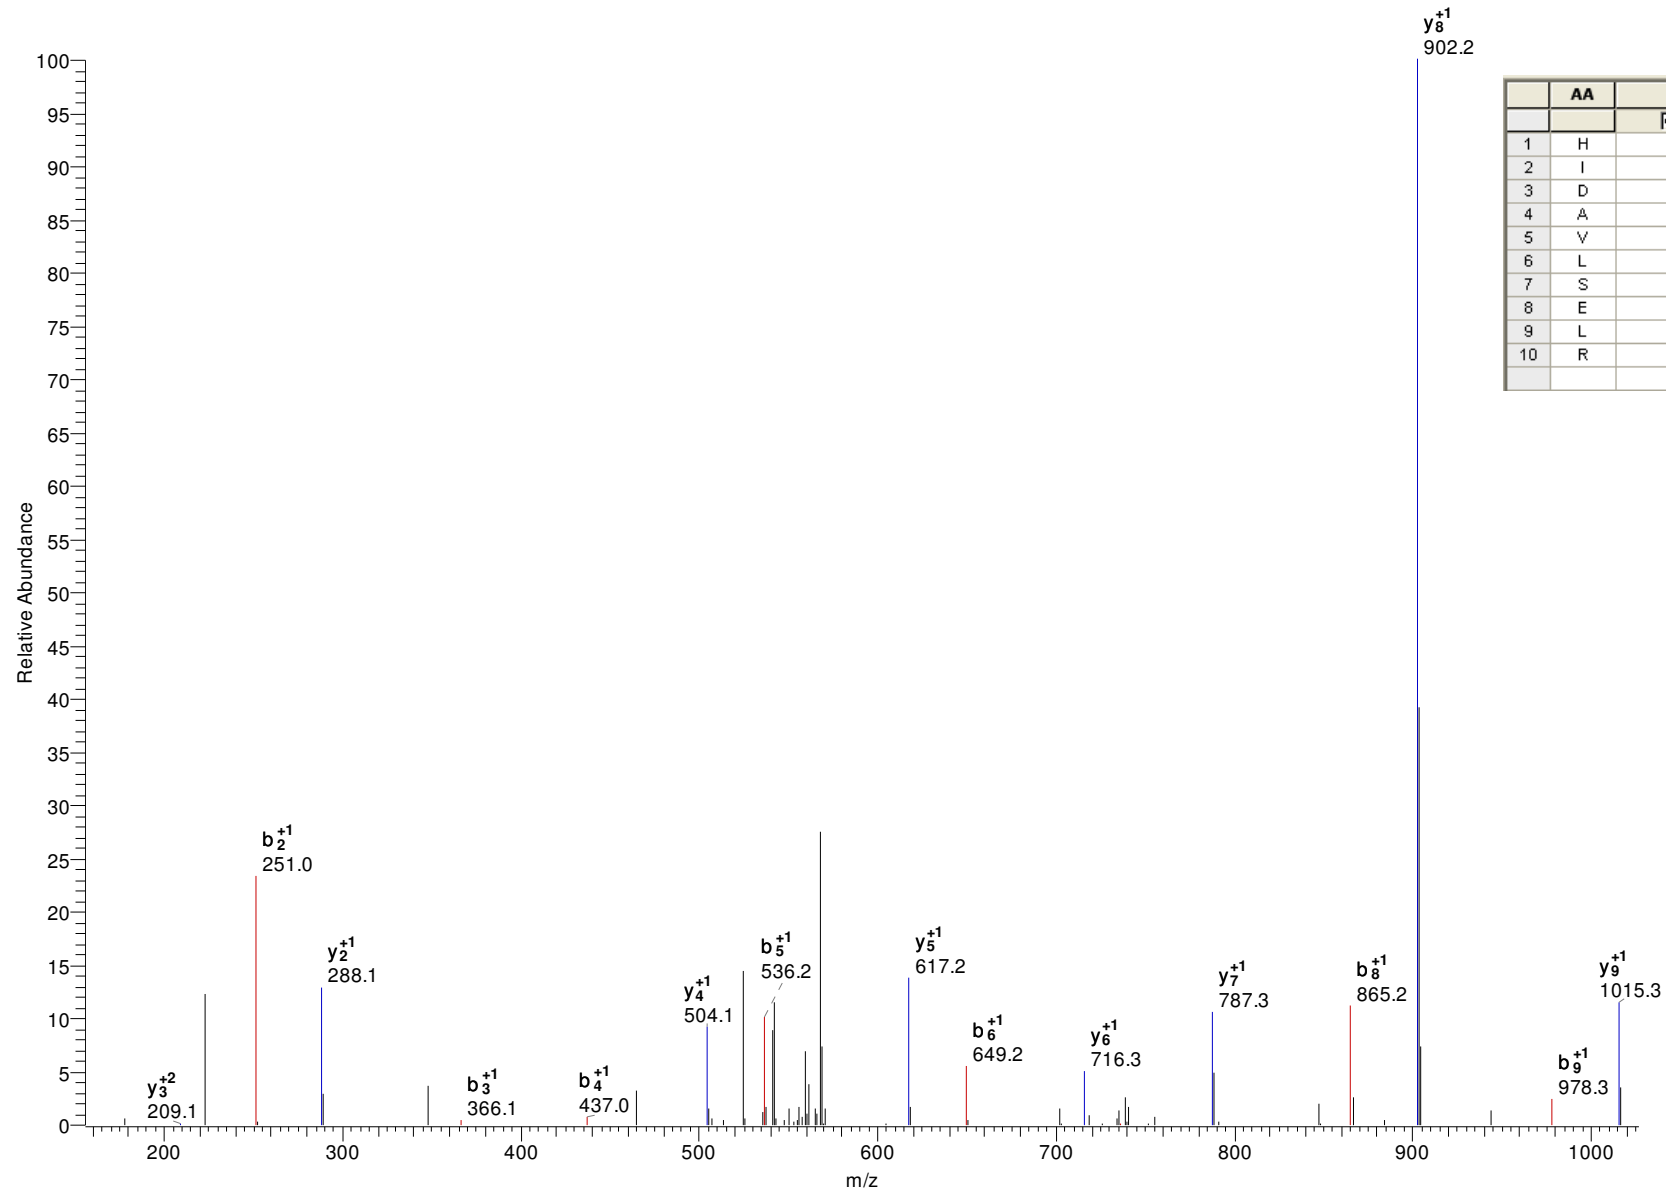

|    | AA | B      | Y       |    |
|----|----|--------|---------|----|
|    |    | ✓      | ✓       |    |
| 1  | H  | 138.07 | -       | 10 |
| 2  | I  | 251.15 | 1015.58 | 9  |
| 3  | D  | 366.18 | 902.49  | 8  |
| 4  | A  | 437.21 | 787.47  | 7  |
| 5  | V  | 536.28 | 716.43  | 6  |
| 6  | L  | 649.37 | 617.36  | 5  |
| 7  | S  | 736.40 | 504.28  | 4  |
| 8  | E  | 865.44 | 417.25  | 3  |
| 9  | L  | 978.53 | 288.20  | 2  |
| 10 | R  | -      | 175.12  | 1  |

gi|70868973|gb|EAN83677.1| tryptophanyl-tRNA synthetase, putative [Trypanosoma cruzi]

K.VLIEIVSNIVK.Q

M+H=1226.771851

DeltaM=1.86809

z=2

P(pep)=0.000674847

Xcorr=2.85

DCn=0.44

#5194-5194 NL:7.53E1

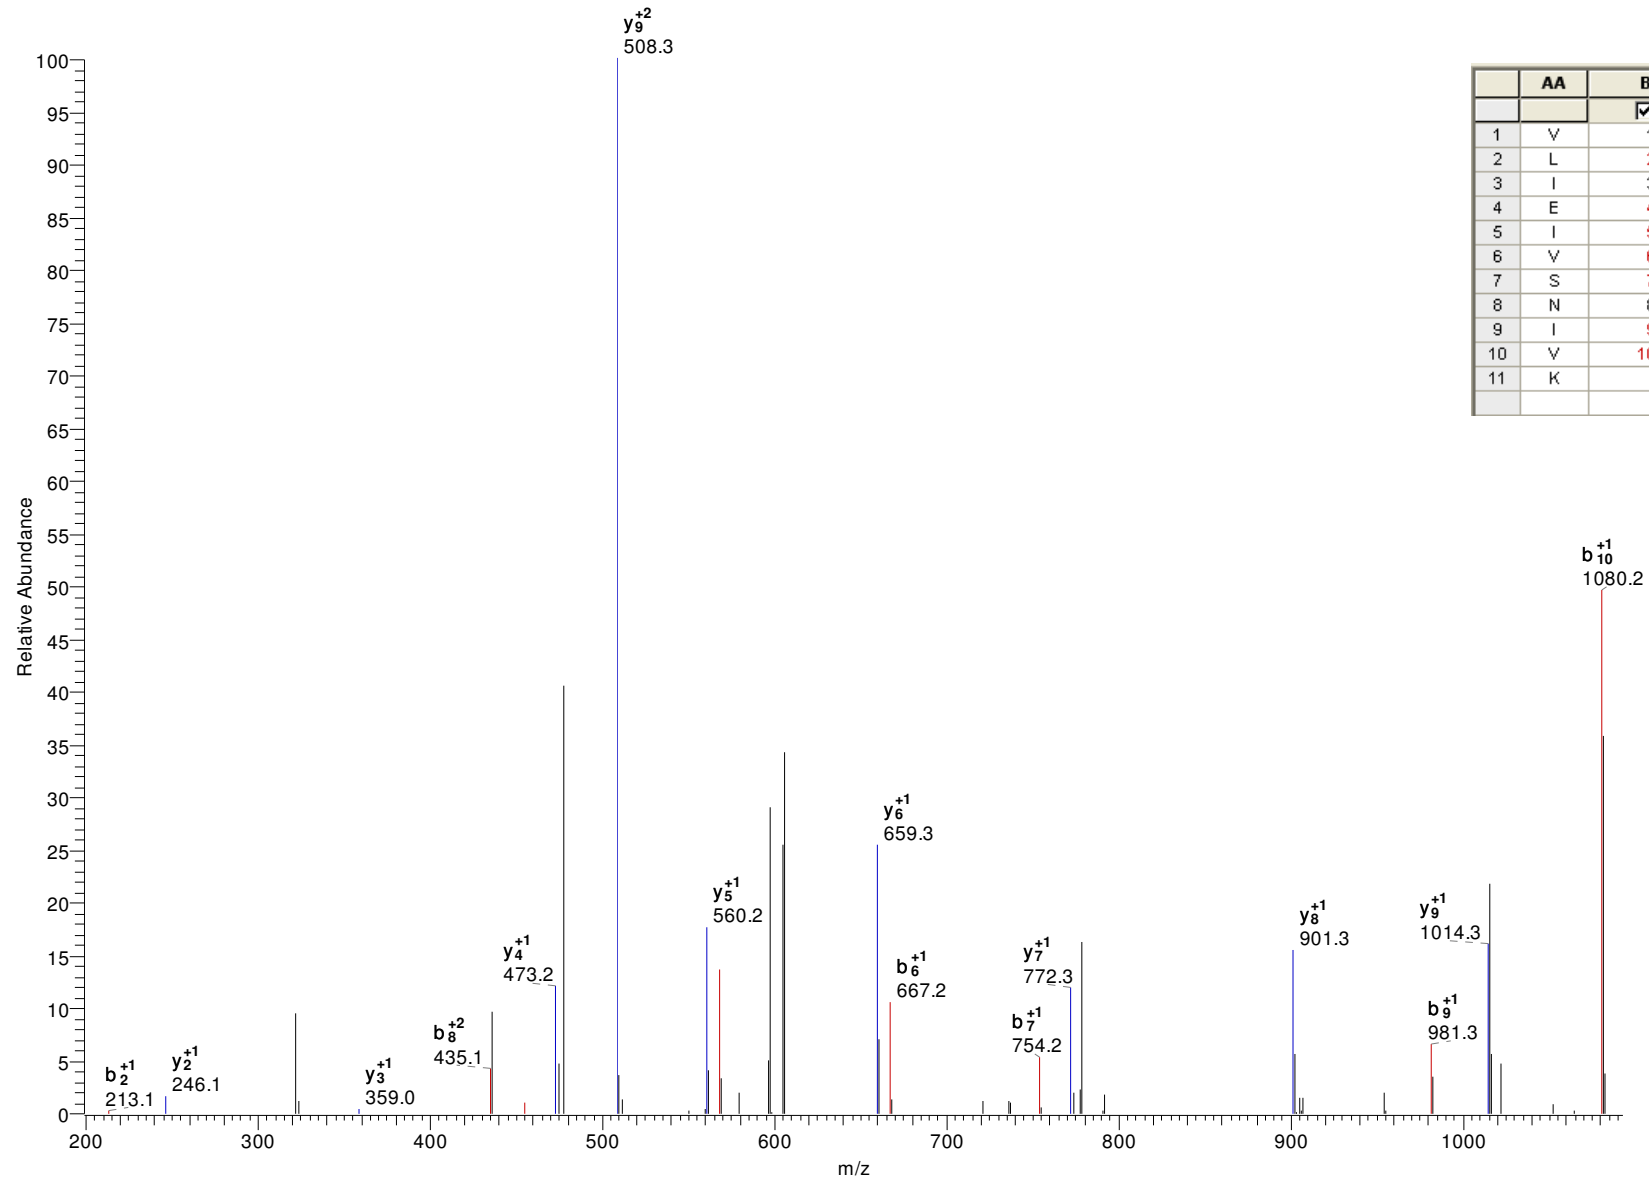

|    | AA | B                                   | Y                                   |    |
|----|----|-------------------------------------|-------------------------------------|----|
|    |    | <input checked="" type="checkbox"/> | <input checked="" type="checkbox"/> |    |
| 1  | V  | 100.08                              | -                                   | 11 |
| 2  | L  | 213.16                              | 1127.70                             | 10 |
| 3  | I  | 326.24                              | 1014.62                             | 9  |
| 4  | E  | 455.29                              | 901.54                              | 8  |
| 5  | I  | 568.37                              | 772.49                              | 7  |
| 6  | V  | 667.44                              | 659.41                              | 6  |
| 7  | S  | 754.47                              | 560.34                              | 5  |
| 8  | N  | 868.51                              | 473.31                              | 4  |
| 9  | I  | 981.60                              | 359.27                              | 3  |
| 10 | V  | 1080.67                             | 246.18                              | 2  |
| 11 | K  | -                                   | 147.11                              | 1  |

gi|70886240|gb|EAN99027.1| alanine aminotransferase, putative [Trypanosoma cruzi]

R.TGAYTDSAGYAFAR.D

M+H=1450.65979

DeltaM=1.50408

z=2

P(pep)=8.06E-07

Xcorr=2.84

DCn=0.19

#3241-3241 NL: 5.63E1

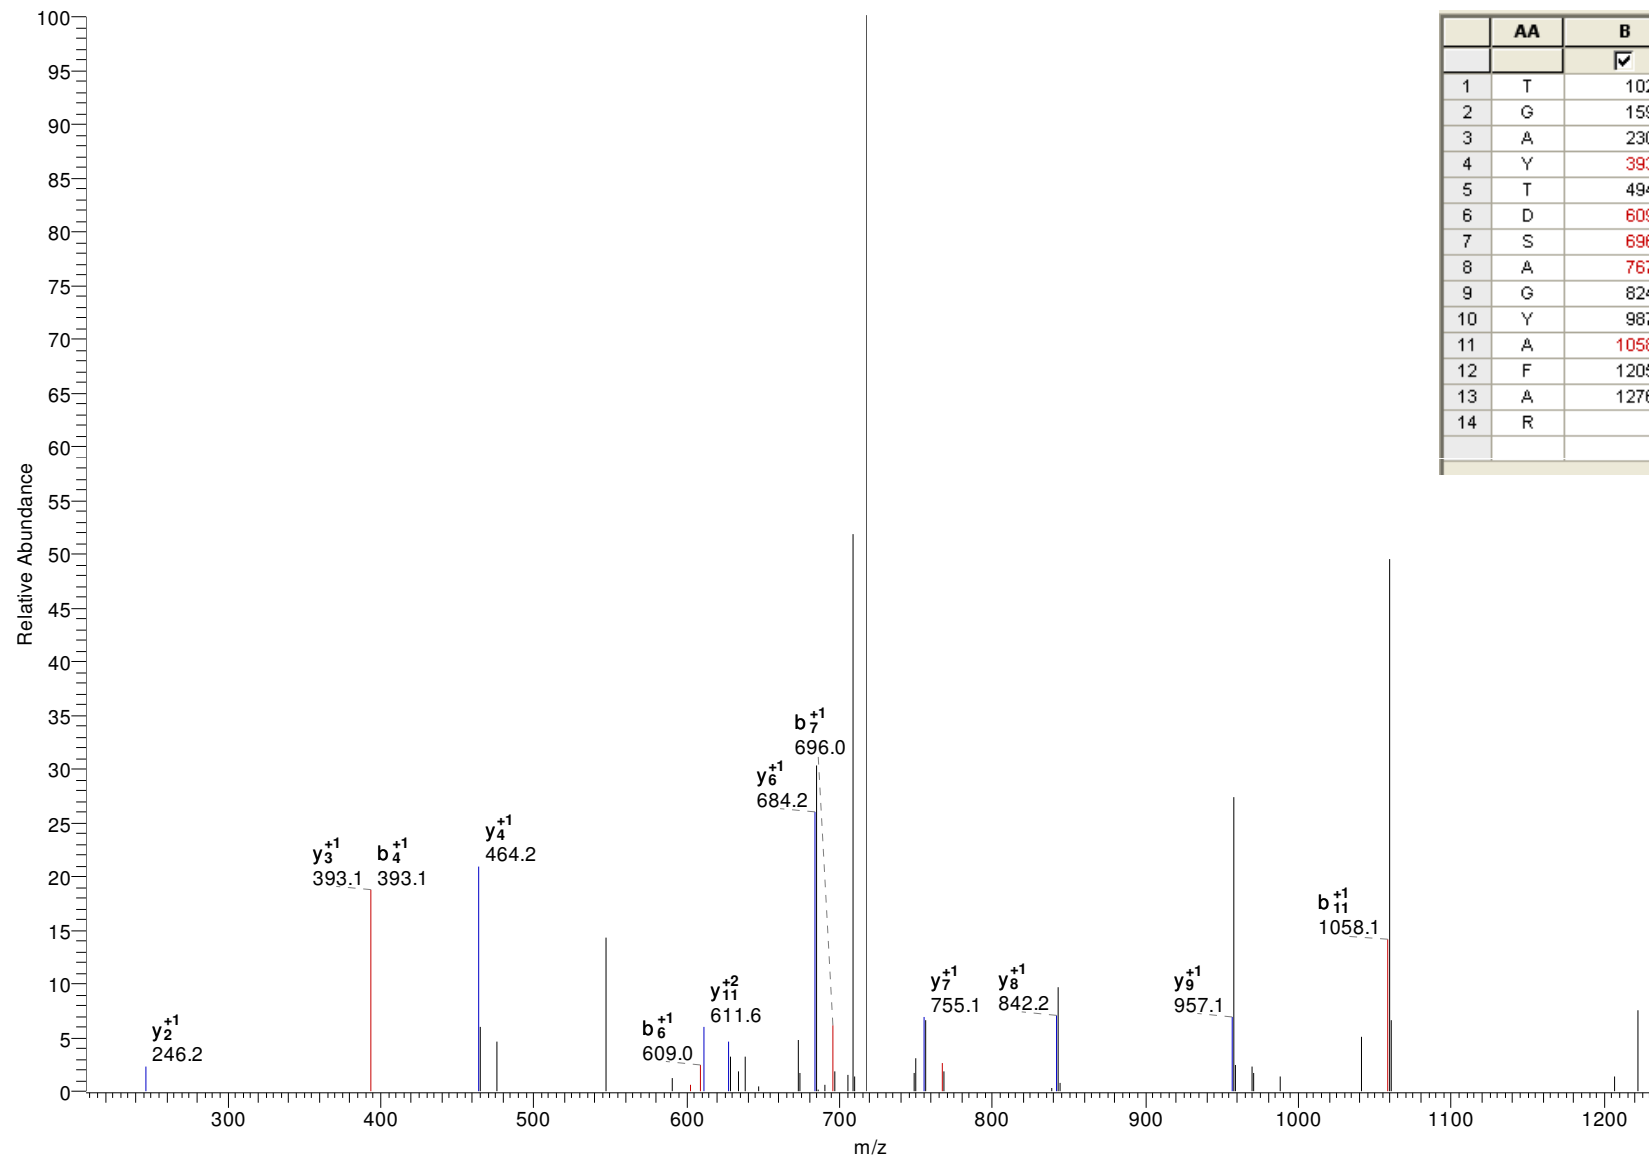

|    | AA | B                                   | Y                                   |    |
|----|----|-------------------------------------|-------------------------------------|----|
|    |    | <input checked="" type="checkbox"/> | <input checked="" type="checkbox"/> |    |
| 1  | T  | 102.05                              | -                                   | 14 |
| 2  | G  | 159.08                              | 1349.61                             | 13 |
| 3  | A  | 230.11                              | 1292.59                             | 12 |
| 4  | Y  | 393.18                              | 1221.55                             | 11 |
| 5  | T  | 494.22                              | 1058.49                             | 10 |
| 6  | D  | 609.25                              | 957.44                              | 9  |
| 7  | S  | 696.28                              | 842.42                              | 8  |
| 8  | A  | 767.32                              | 755.38                              | 7  |
| 9  | G  | 824.34                              | 684.35                              | 6  |
| 10 | Y  | 987.41                              | 627.32                              | 5  |
| 11 | A  | 1058.44                             | 464.26                              | 4  |
| 12 | F  | 1205.51                             | 393.22                              | 3  |
| 13 | A  | 1276.55                             | 246.16                              | 2  |
| 14 | R  | -                                   | 175.12                              | 1  |

gi|70878070|gb|EAN91357.1| hypothetical protein, conserved [Trypanosoma cruzi]  
-.ADQQLQLILDK.- M+H=1284.71582 DeltaM=1.01494 z=2  
P(pep)=3.03E-05 Xcorr=2.84 DCn=0.41

#3866-3866 NL: 8.30E1

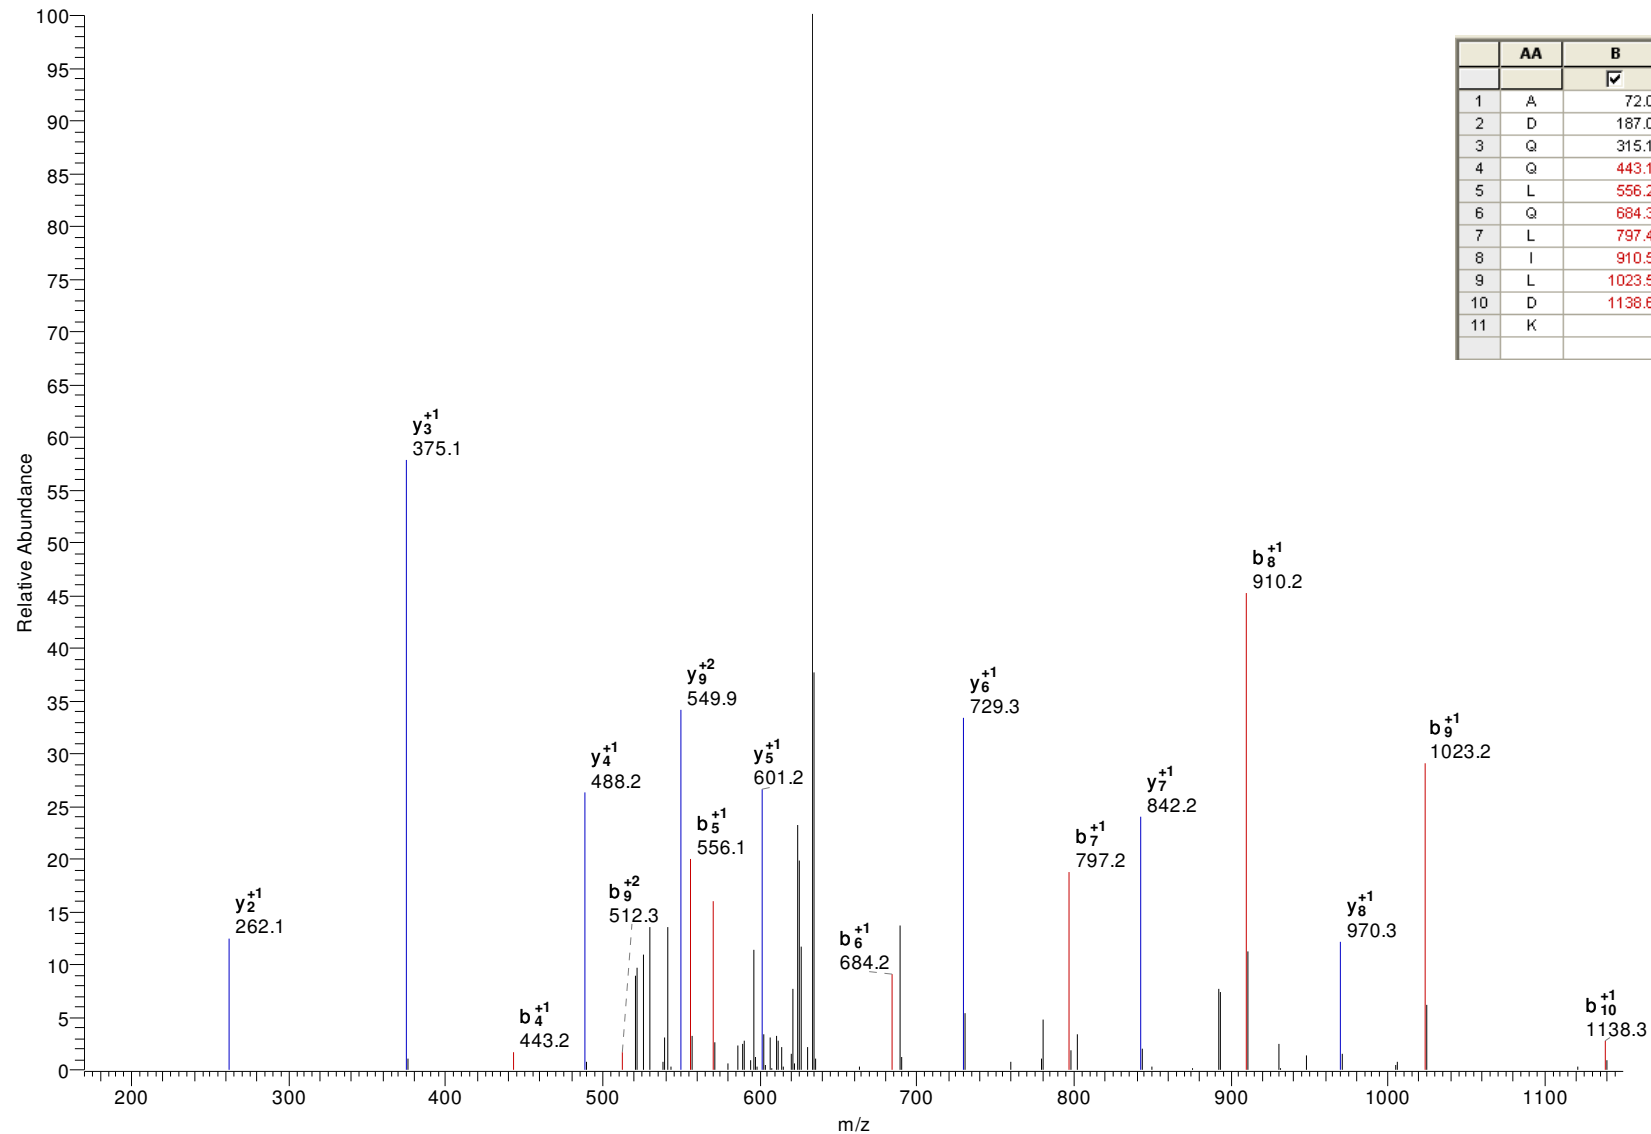

|    | AA | B       | Y       |    |
|----|----|---------|---------|----|
|    |    | ✓       | ✓       |    |
| 1  | A  | 72.04   | -       | 11 |
| 2  | D  | 187.07  | 1213.68 | 10 |
| 3  | Q  | 315.13  | 1098.65 | 9  |
| 4  | Q  | 443.19  | 970.59  | 8  |
| 5  | L  | 556.27  | 842.53  | 7  |
| 6  | Q  | 684.33  | 729.45  | 6  |
| 7  | L  | 797.42  | 601.39  | 5  |
| 8  | I  | 910.50  | 488.31  | 4  |
| 9  | L  | 1023.58 | 375.22  | 3  |
| 10 | D  | 1138.61 | 262.14  | 2  |
| 11 | K  | -       | 147.11  | 1  |

gi|70868040|gb|EAN83013.1| ATP-dependent Clp protease subunit, heat shock protein 78, putative [Trypanosoma cruzi]  
R.KIVELLFDQVR.A M+H=1359.799438 DeltaM=0.82732 z=2

P(pep)=2.53E-05

Xcorr=2.82

DCn=0.44

#5117-5117 NL:3.10E1

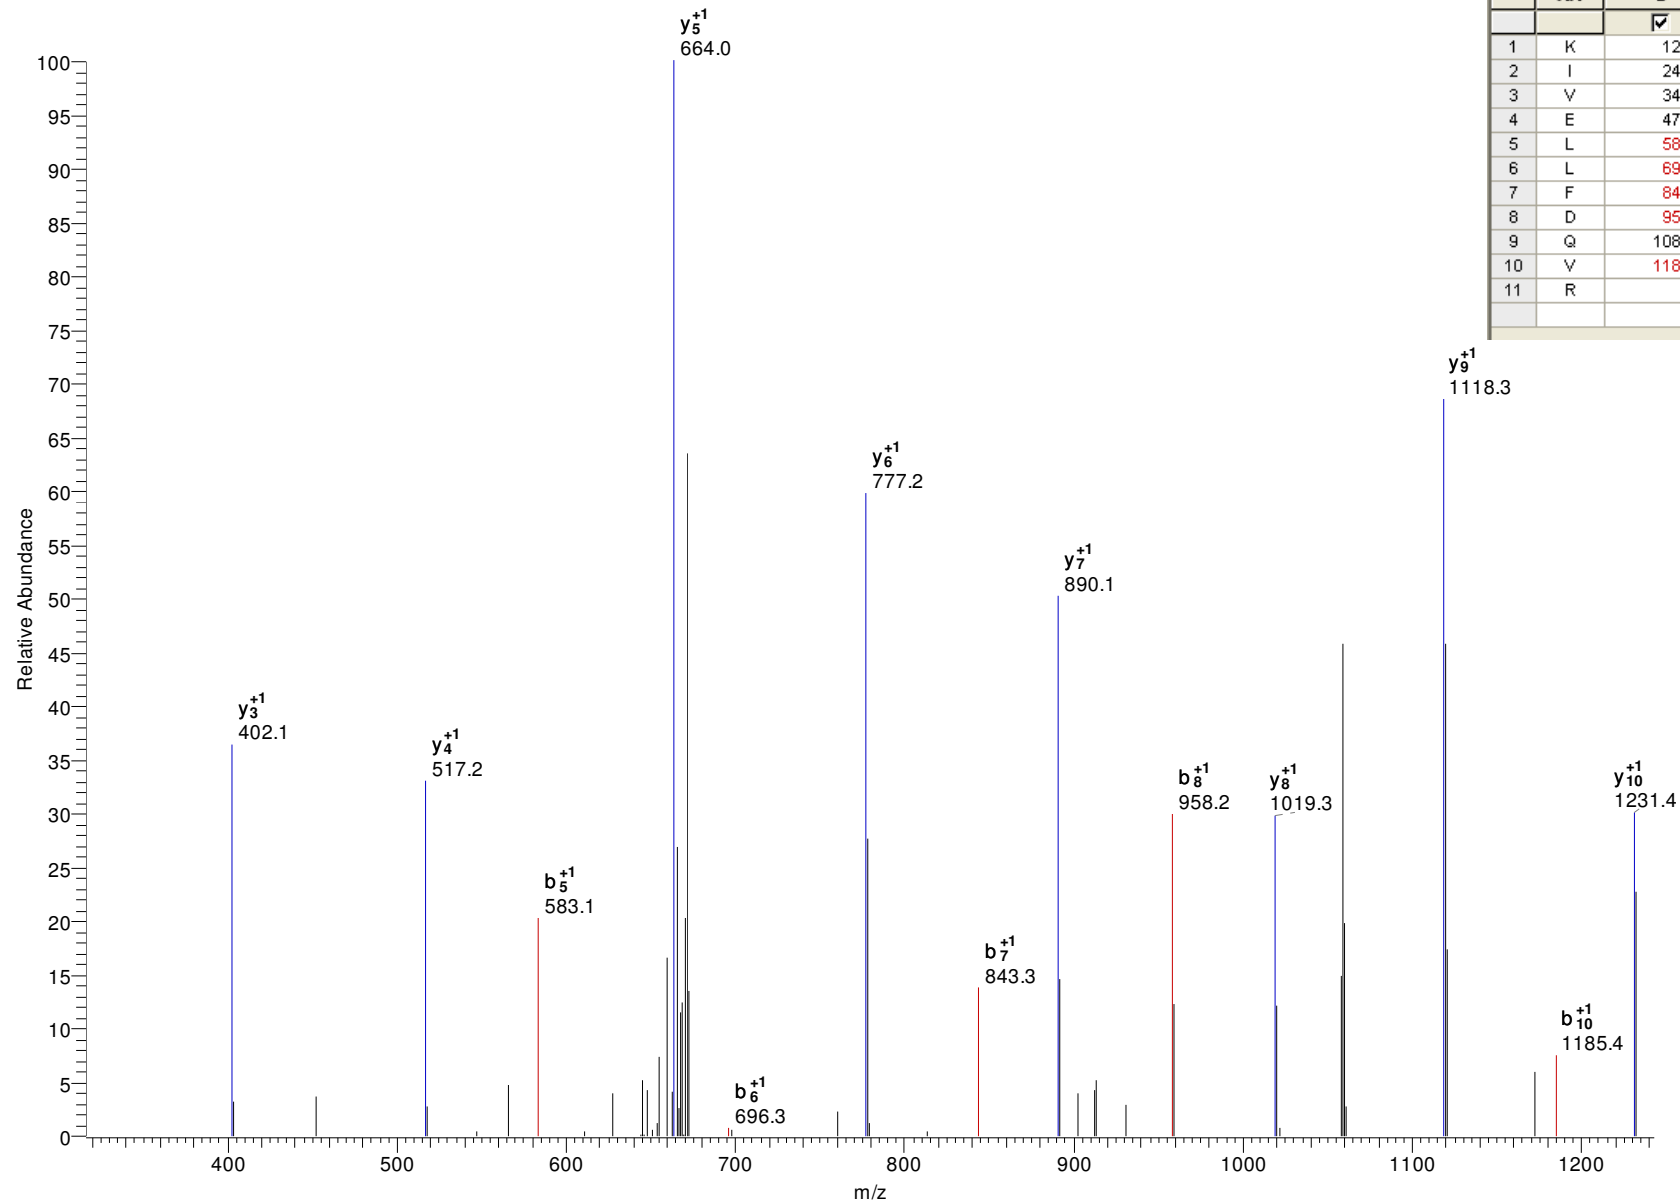

|    | AA | B       | Y       |    |
|----|----|---------|---------|----|
|    |    | ✓       | ✓       |    |
| 1  | K  | 129.10  | -       | 11 |
| 2  | I  | 242.19  | 1231.70 | 10 |
| 3  | V  | 341.25  | 1118.62 | 9  |
| 4  | E  | 470.30  | 1019.55 | 8  |
| 5  | L  | 583.38  | 890.51  | 7  |
| 6  | L  | 696.47  | 777.43  | 6  |
| 7  | F  | 843.53  | 664.34  | 5  |
| 8  | D  | 958.56  | 517.27  | 4  |
| 9  | Q  | 1086.62 | 402.25  | 3  |
| 10 | V  | 1185.69 | 274.19  | 2  |
| 11 | R  | -       | 175.12  | 1  |

gi|70875675|gb|EAN89203.1| nitrilase, putative [Trypanosoma cruzi]

R.EVLSPGSTAFPVSINEK.I

M+H=1774.922119

DeltaM=0.59416

z=2

P(pep)=0.000744925

Xcorr=2.80

DCn=0.51

#4123-4123 NL: 7.74E1

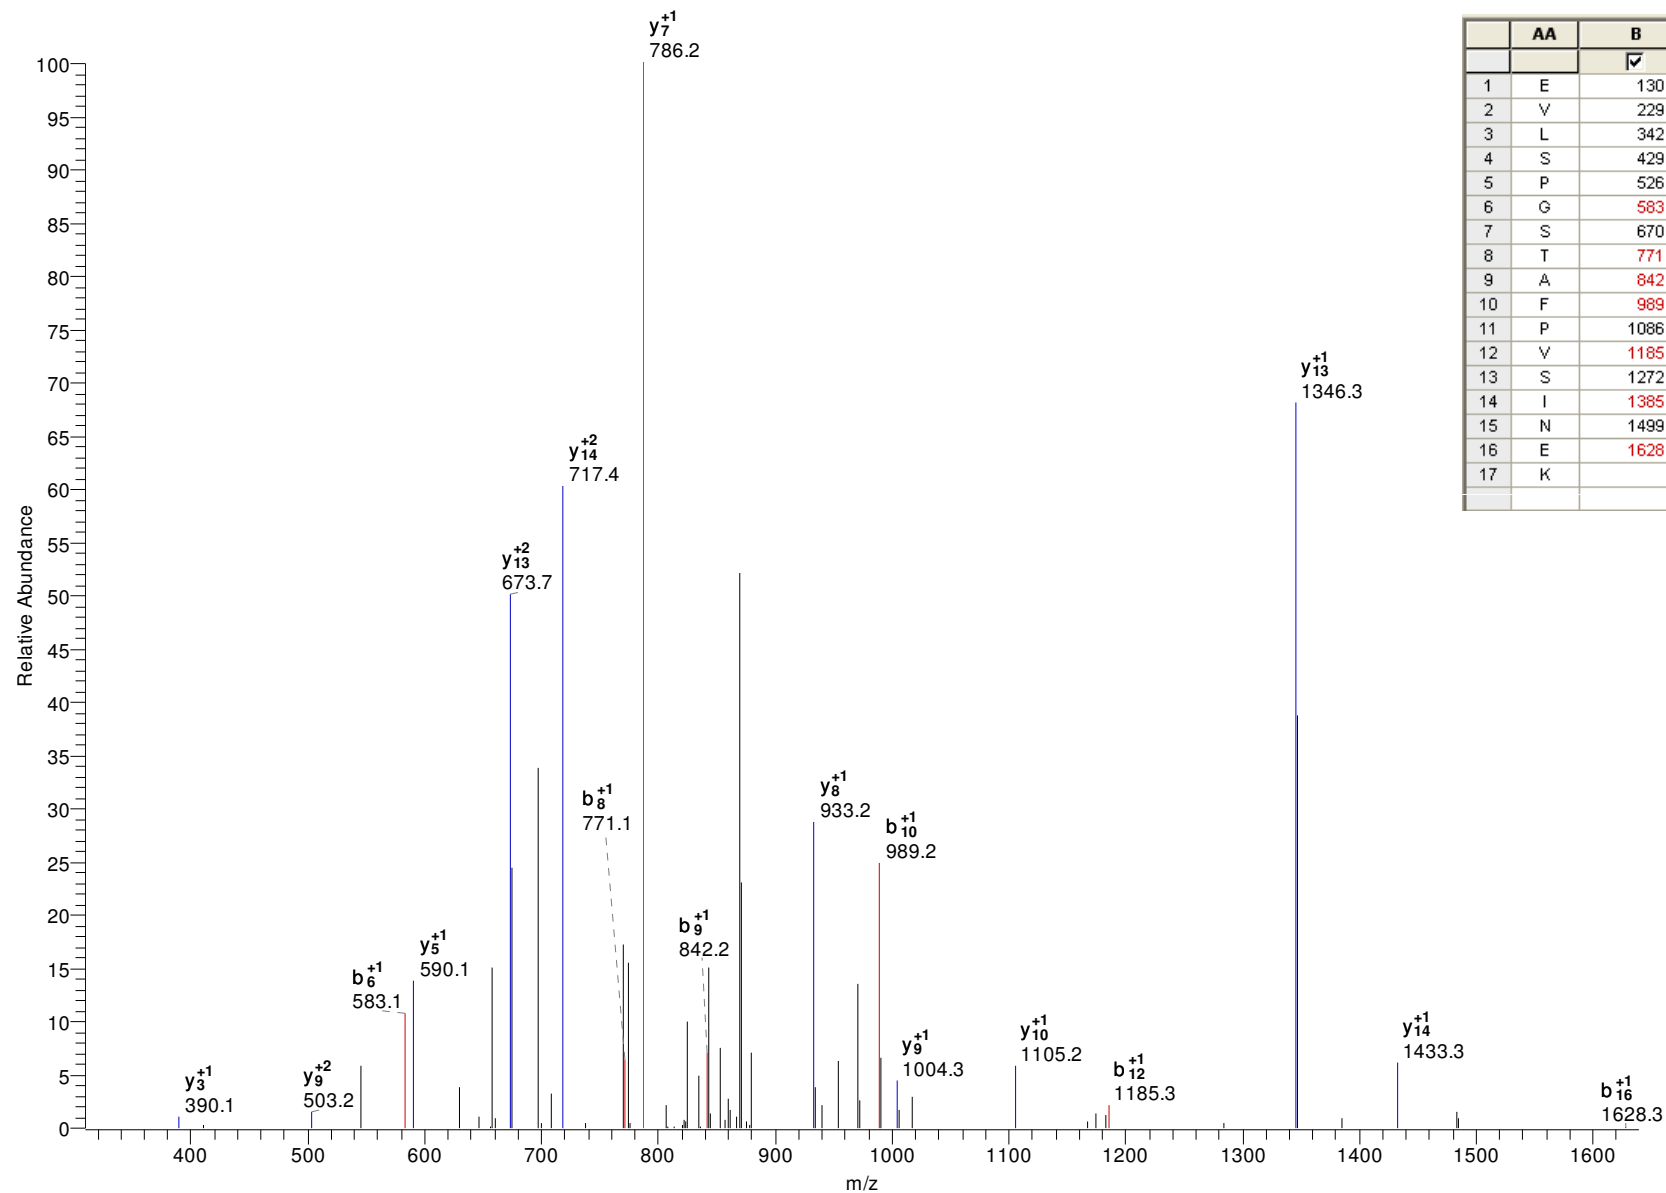

|    | AA | B                                   | Y                                   |    |
|----|----|-------------------------------------|-------------------------------------|----|
|    |    | <input checked="" type="checkbox"/> | <input checked="" type="checkbox"/> |    |
| 1  | E  | 130.05                              | -                                   | 17 |
| 2  | V  | 229.12                              | 1645.88                             | 16 |
| 3  | L  | 342.20                              | 1546.81                             | 15 |
| 4  | S  | 429.23                              | 1433.73                             | 14 |
| 5  | P  | 526.29                              | 1346.70                             | 13 |
| 6  | G  | 583.31                              | 1249.64                             | 12 |
| 7  | S  | 670.34                              | 1192.62                             | 11 |
| 8  | T  | 771.39                              | 1105.59                             | 10 |
| 9  | A  | 842.43                              | 1004.54                             | 9  |
| 10 | F  | 989.49                              | 933.50                              | 8  |
| 11 | P  | 1086.55                             | 786.44                              | 7  |
| 12 | V  | 1185.62                             | 689.38                              | 6  |
| 13 | S  | 1272.65                             | 590.31                              | 5  |
| 14 | I  | 1385.73                             | 503.28                              | 4  |
| 15 | N  | 1499.77                             | 390.20                              | 3  |
| 16 | E  | 1628.82                             | 276.16                              | 2  |
| 17 | K  | -                                   | 147.11                              | 1  |

gi|70885576|gb|EAN98388.1| hypothetical protein, conserved [Trypanosoma cruzi]

K.AIGELETELSSVR.H

M+H=1403.737671

DeltaM=0.68279

z=2

P(pep)=0.000374958

Xcorr=2.78

DCn=0.43

#4065-4065 NL: 3.05E1

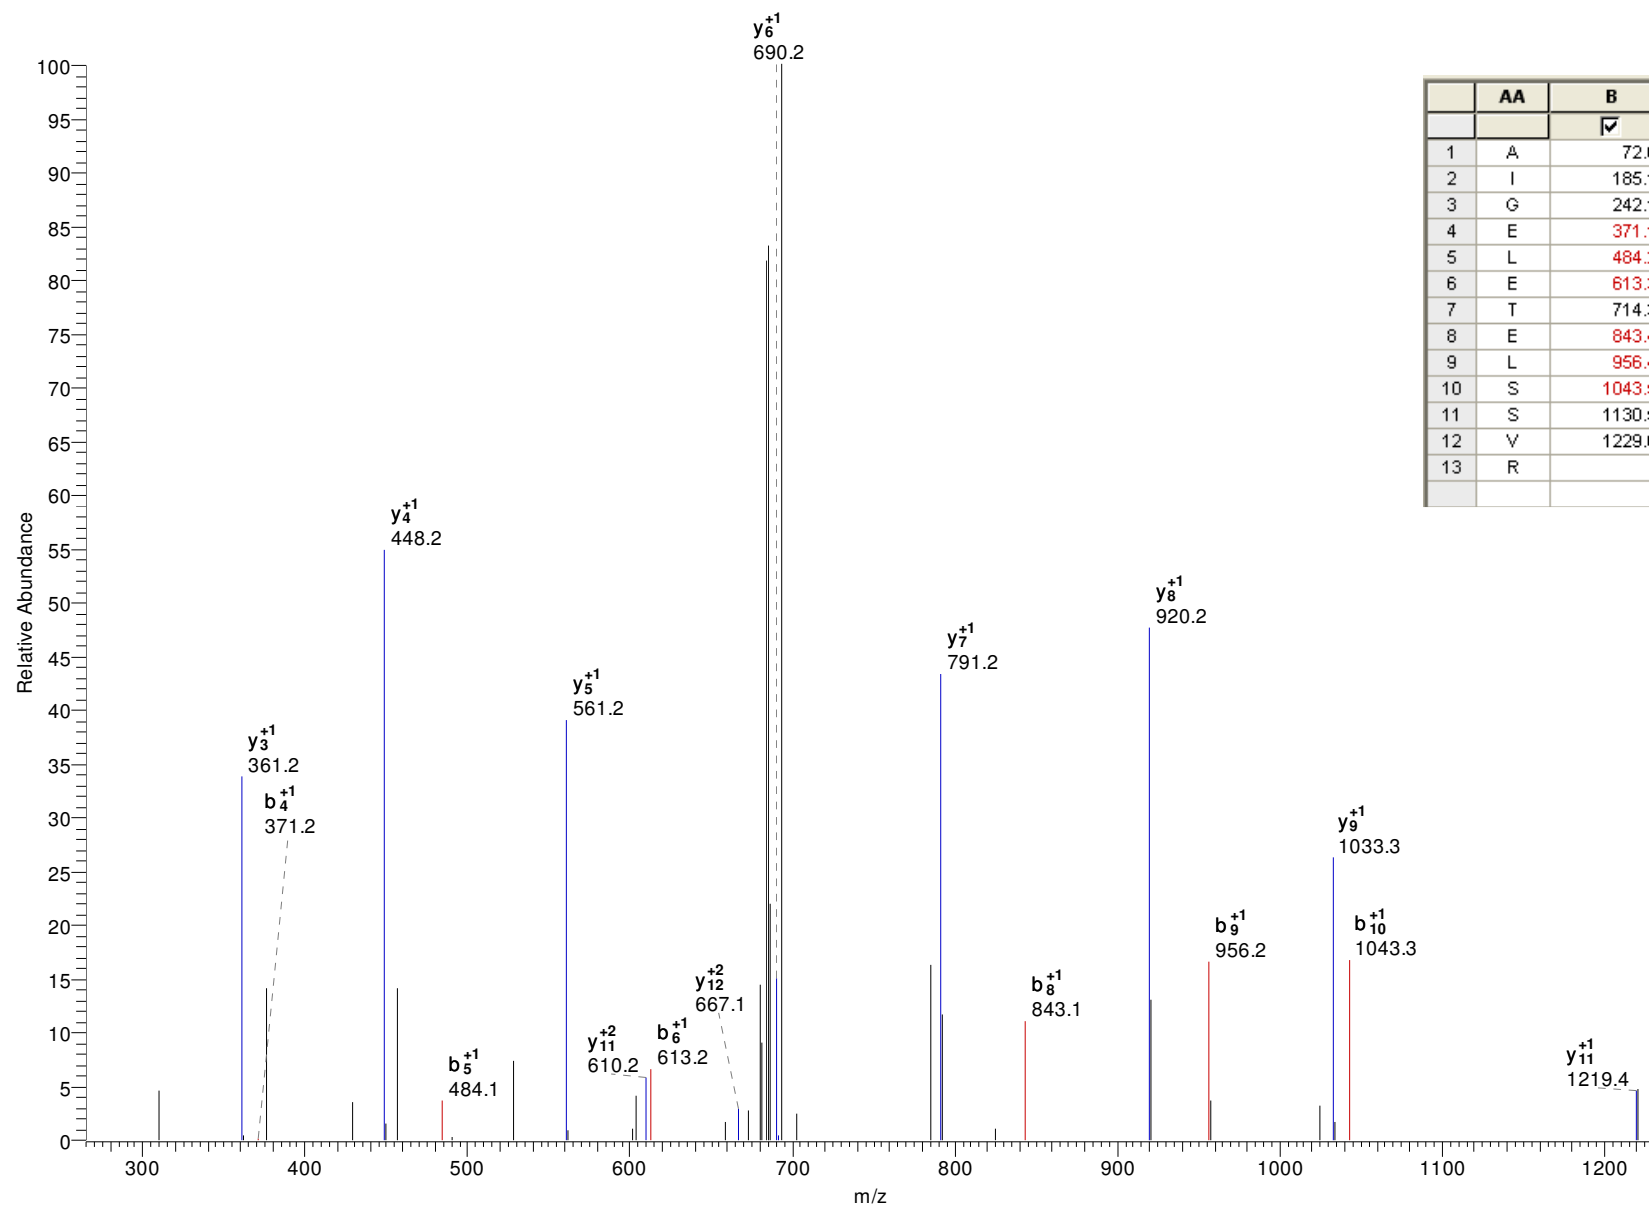

|    | AA | B                                   | Y                                   |    |
|----|----|-------------------------------------|-------------------------------------|----|
|    |    | <input checked="" type="checkbox"/> | <input checked="" type="checkbox"/> |    |
| 1  | A  | 72.04                               | -                                   | 13 |
| 2  | I  | 185.13                              | 1332.70                             | 12 |
| 3  | G  | 242.15                              | 1219.62                             | 11 |
| 4  | E  | 371.19                              | 1162.60                             | 10 |
| 5  | L  | 484.28                              | 1033.55                             | 9  |
| 6  | E  | 613.32                              | 920.47                              | 8  |
| 7  | T  | 714.37                              | 791.43                              | 7  |
| 8  | E  | 843.41                              | 690.38                              | 6  |
| 9  | L  | 956.49                              | 561.34                              | 5  |
| 10 | S  | 1043.53                             | 448.25                              | 4  |
| 11 | S  | 1130.56                             | 361.22                              | 3  |
| 12 | V  | 1229.63                             | 274.19                              | 2  |
| 13 | R  | -                                   | 175.12                              | 1  |



gi|70886848|gb|EAN99616.1| tyrosine aminotransferase, putative [Trypanosoma cruzi]

K.SFVSELLSASAAGSSGK.G

M+H=1597.806763

DeltaM=1.41203

z=2

P(pep)=3.55E-05

Xcorr=2.73

DCn=0.52

#5572-5572 NL: 3.54E1

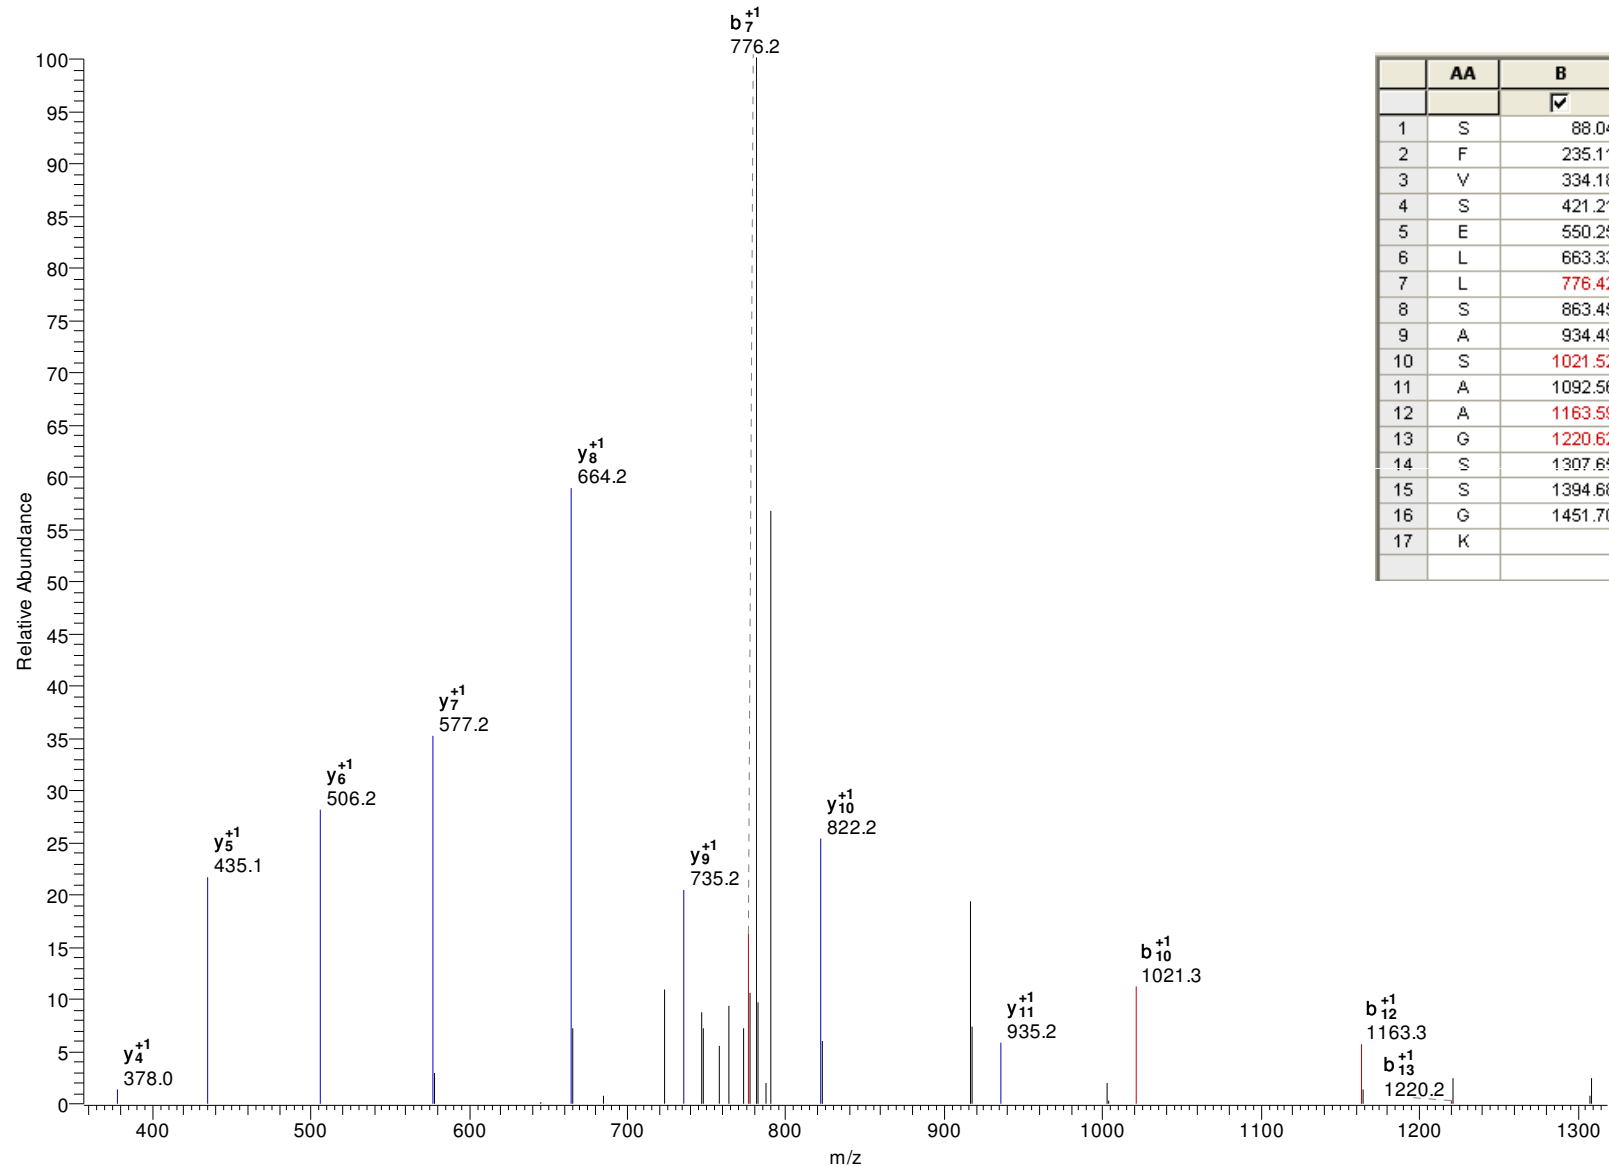

|    | AA | B                                   | Y                                   |    |
|----|----|-------------------------------------|-------------------------------------|----|
|    |    | <input checked="" type="checkbox"/> | <input checked="" type="checkbox"/> |    |
| 1  | S  | 88.04                               | -                                   | 17 |
| 2  | F  | 235.11                              | 1510.77                             | 16 |
| 3  | V  | 334.18                              | 1363.71                             | 15 |
| 4  | S  | 421.21                              | 1264.64                             | 14 |
| 5  | E  | 550.25                              | 1177.61                             | 13 |
| 6  | L  | 663.33                              | 1048.56                             | 12 |
| 7  | L  | 776.42                              | 935.48                              | 11 |
| 8  | S  | 863.45                              | 822.40                              | 10 |
| 9  | A  | 934.49                              | 735.36                              | 9  |
| 10 | S  | 1021.52                             | 664.33                              | 8  |
| 11 | A  | 1092.56                             | 577.29                              | 7  |
| 12 | A  | 1163.59                             | 506.26                              | 6  |
| 13 | G  | 1220.62                             | 435.22                              | 5  |
| 14 | S  | 1307.65                             | 378.20                              | 4  |
| 15 | S  | 1394.68                             | 291.17                              | 3  |
| 16 | G  | 1451.70                             | 204.13                              | 2  |
| 17 | K  | -                                   | 147.11                              | 1  |

gi|70885077|gb|EAN97910.1| hypothetical protein Tc00.1047053506825.200 [Trypanosoma cruzi]  
 K.AHPDENEEEEGDVAALLSEHR.L M+H=2347.043213 DeltaM=1.62461  
 P(pep)=7.15E-06 Xcorr=2.73 DCn=0.51

z=3

#3876-3876 NL: 5.36E2

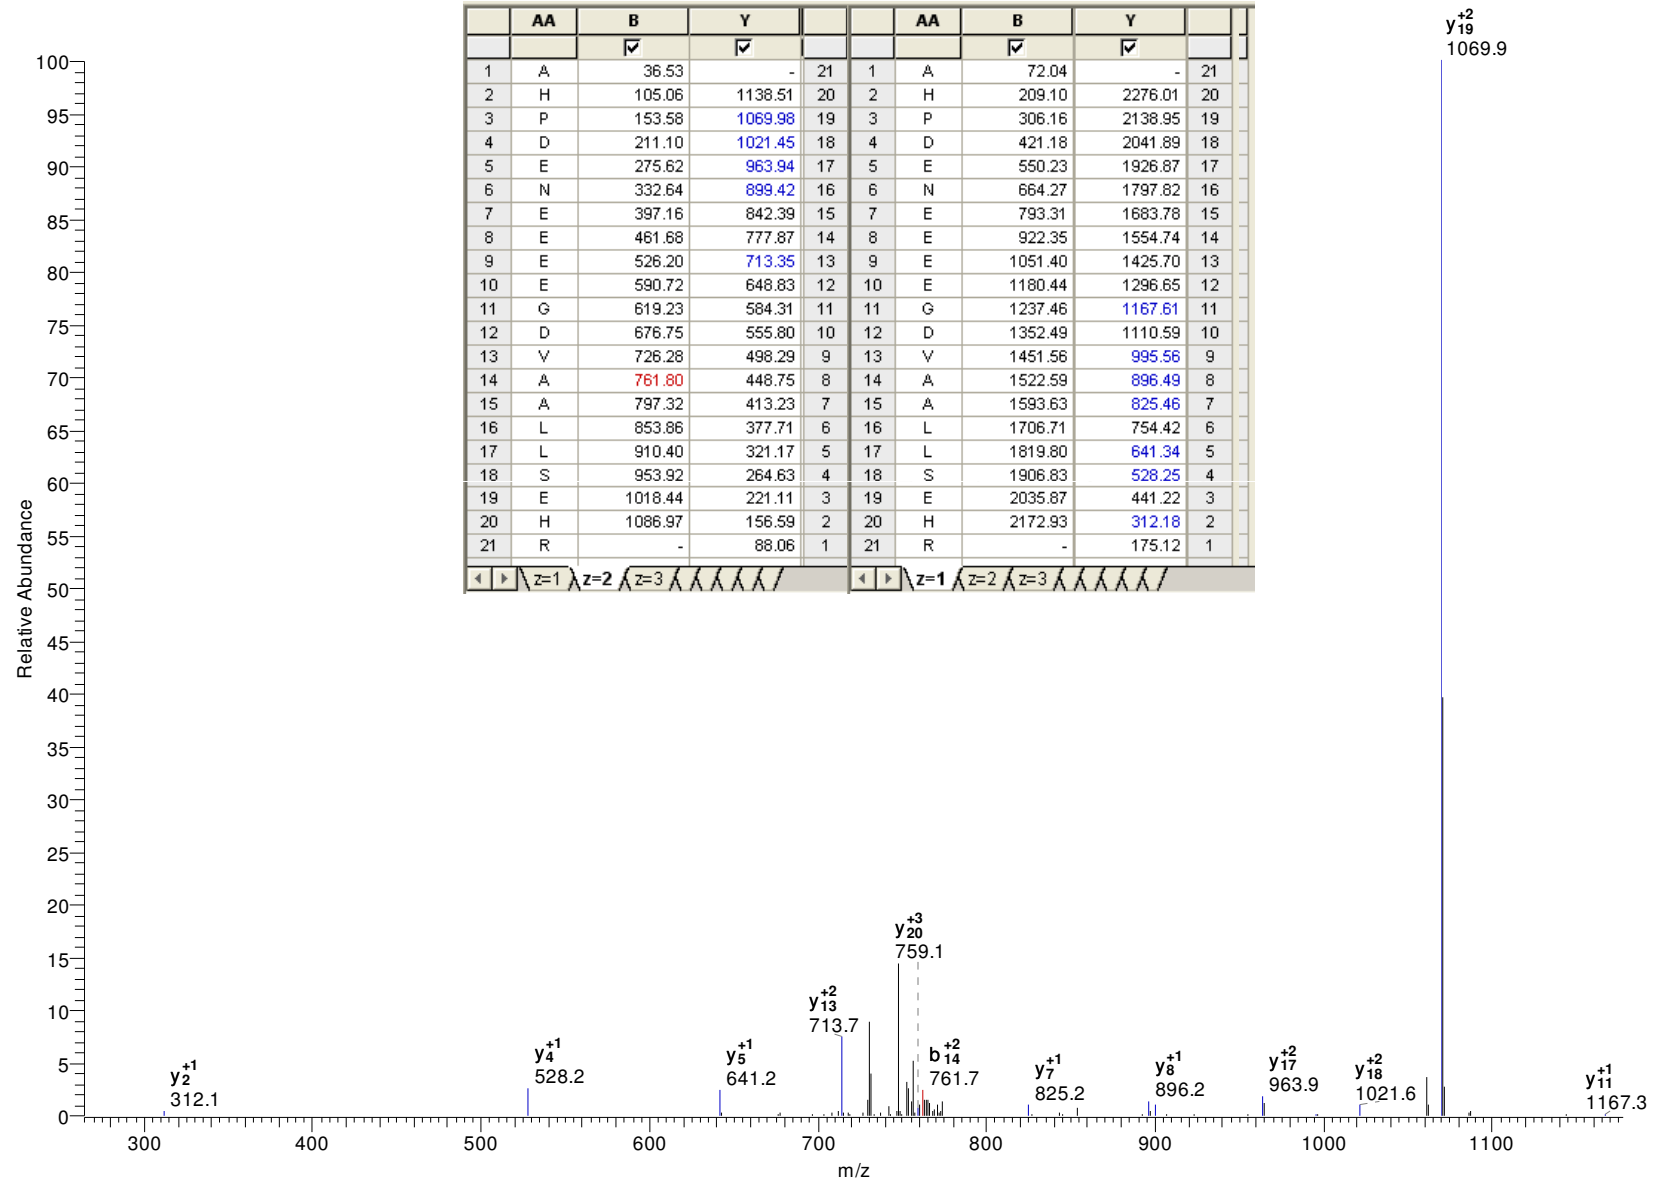

gi|70869470|gb|EAN84039.1| hypothetical protein, conserved [Trypanosoma cruzi]  
 -.FASNCVETAIAACHSLPDGSALLLR.- M+H=2673.3125 DeltaM=0.01834 z=3  
 P(pep)=2.06E-06 Xcorr=2.71 DCn=0.53

#4888-4888 NL: 1.66E2

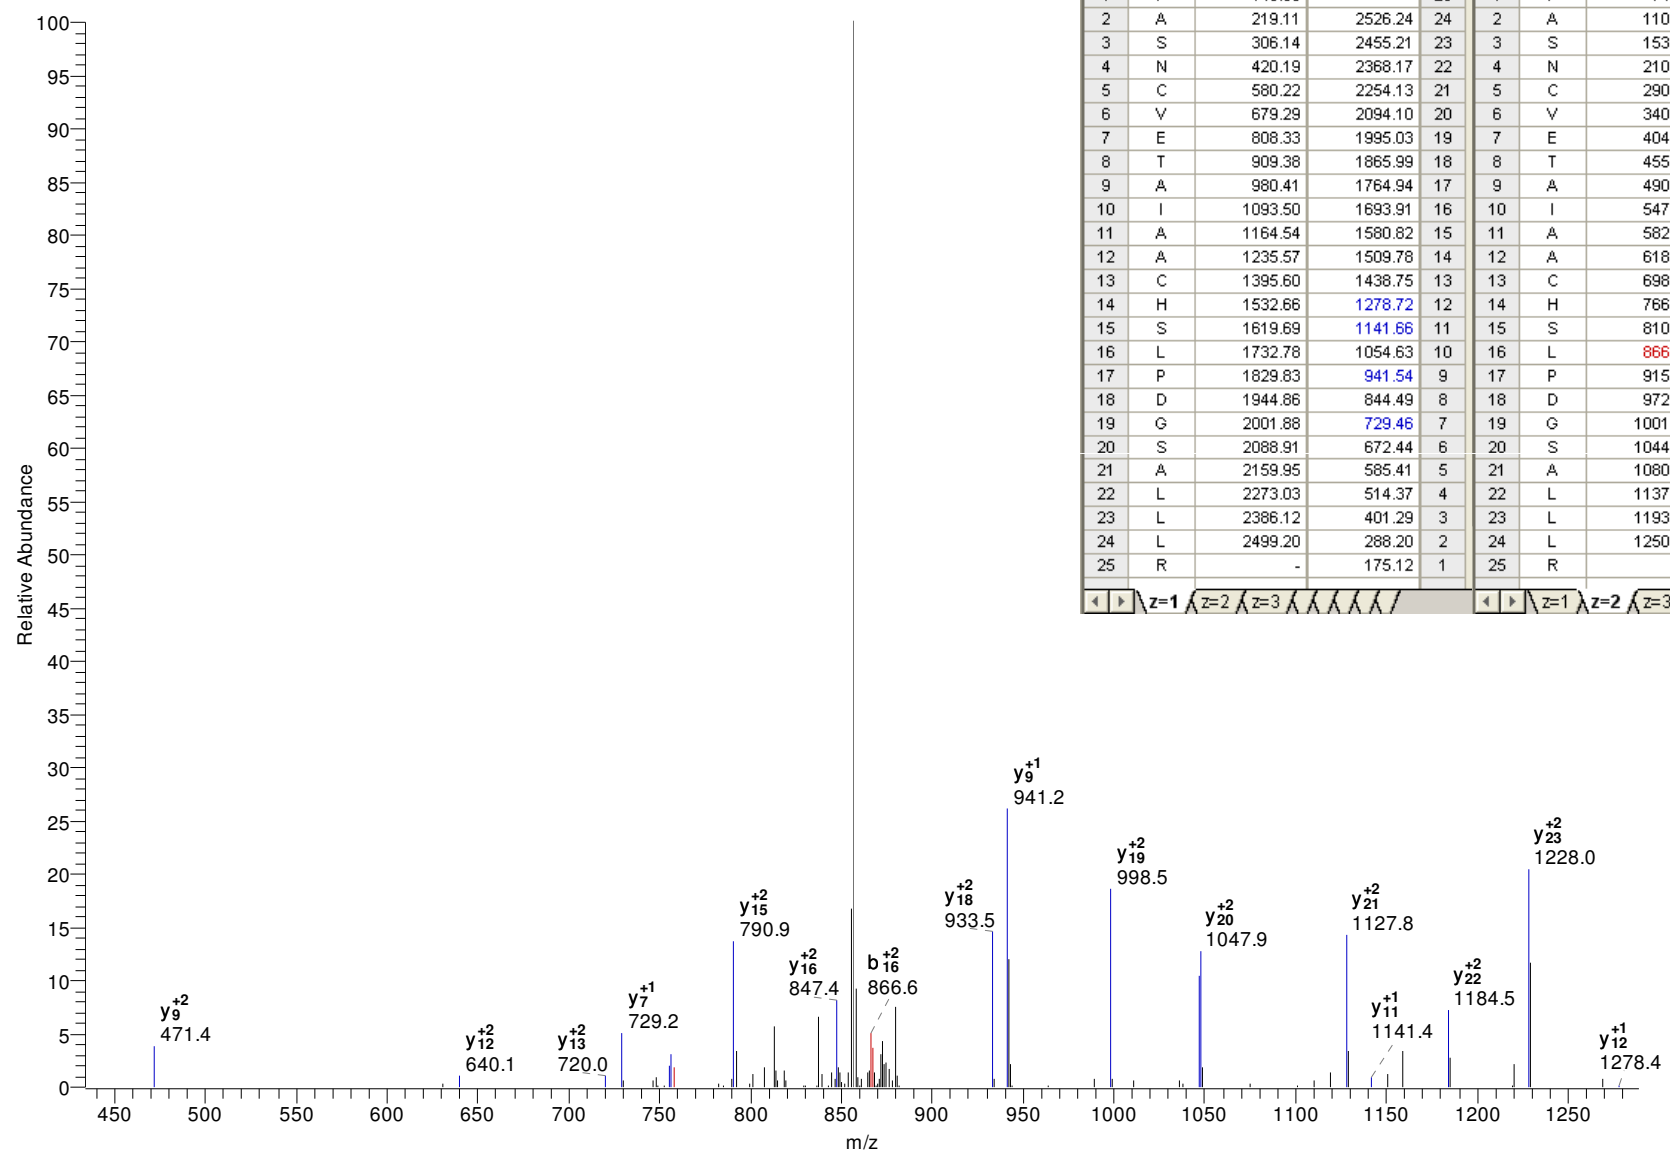

|    | AA | B       | Y       |    |    | AA | B       | Y       |    |
|----|----|---------|---------|----|----|----|---------|---------|----|
|    |    | ✓       | ✓       |    |    |    | ✓       | ✓       |    |
| 1  | F  | 148.08  | -       | 25 | 1  | F  | 74.54   | -       | 25 |
| 2  | A  | 219.11  | 2526.24 | 24 | 2  | A  | 110.06  | 1263.63 | 24 |
| 3  | S  | 306.14  | 2455.21 | 23 | 3  | S  | 153.58  | 1228.11 | 23 |
| 4  | N  | 420.19  | 2368.17 | 22 | 4  | N  | 210.60  | 1184.59 | 22 |
| 5  | C  | 580.22  | 2254.13 | 21 | 5  | C  | 290.61  | 1127.57 | 21 |
| 6  | V  | 679.29  | 2094.10 | 20 | 6  | V  | 340.15  | 1047.55 | 20 |
| 7  | E  | 808.33  | 1995.03 | 19 | 7  | E  | 404.67  | 998.02  | 19 |
| 8  | T  | 909.38  | 1865.99 | 18 | 8  | T  | 455.19  | 933.50  | 18 |
| 9  | A  | 980.41  | 1764.94 | 17 | 9  | A  | 490.71  | 882.97  | 17 |
| 10 | I  | 1093.50 | 1693.91 | 16 | 10 | I  | 547.25  | 847.46  | 16 |
| 11 | A  | 1164.54 | 1580.82 | 15 | 11 | A  | 582.77  | 790.91  | 15 |
| 12 | A  | 1235.57 | 1509.78 | 14 | 12 | A  | 618.29  | 755.40  | 14 |
| 13 | C  | 1395.60 | 1438.75 | 13 | 13 | C  | 698.31  | 719.88  | 13 |
| 14 | H  | 1532.66 | 1278.72 | 12 | 14 | H  | 766.83  | 639.86  | 12 |
| 15 | S  | 1619.69 | 1141.66 | 11 | 15 | S  | 810.35  | 571.33  | 11 |
| 16 | L  | 1732.78 | 1054.63 | 10 | 16 | L  | 866.89  | 527.82  | 10 |
| 17 | P  | 1829.83 | 941.54  | 9  | 17 | P  | 915.42  | 471.27  | 9  |
| 18 | D  | 1944.86 | 844.49  | 8  | 18 | D  | 972.93  | 422.75  | 8  |
| 19 | G  | 2001.88 | 729.46  | 7  | 19 | G  | 1001.44 | 365.23  | 7  |
| 20 | S  | 2088.91 | 672.44  | 6  | 20 | S  | 1044.96 | 336.72  | 6  |
| 21 | A  | 2159.95 | 585.41  | 5  | 21 | A  | 1080.48 | 293.21  | 5  |
| 22 | L  | 2273.03 | 514.37  | 4  | 22 | L  | 1137.02 | 257.69  | 4  |
| 23 | L  | 2386.12 | 401.29  | 3  | 23 | L  | 1193.56 | 201.15  | 3  |
| 24 | L  | 2499.20 | 288.20  | 2  | 24 | L  | 1250.10 | 144.61  | 2  |
| 25 | R  | -       | 175.12  | 1  | 25 | R  | -       | 88.06   | 1  |

gi|16923277|dbj|BAB71999.1| aspartate carbamoyltransferase [Trypanosoma cruzi]

K.SITSAEQFSR.A

M+H=1125.553467

DeltaM=1.82036

z=2

P(pep)=0.000909799

Xcorr=2.67

DCn=0.52

#2356-2356 NL: 1.05E2

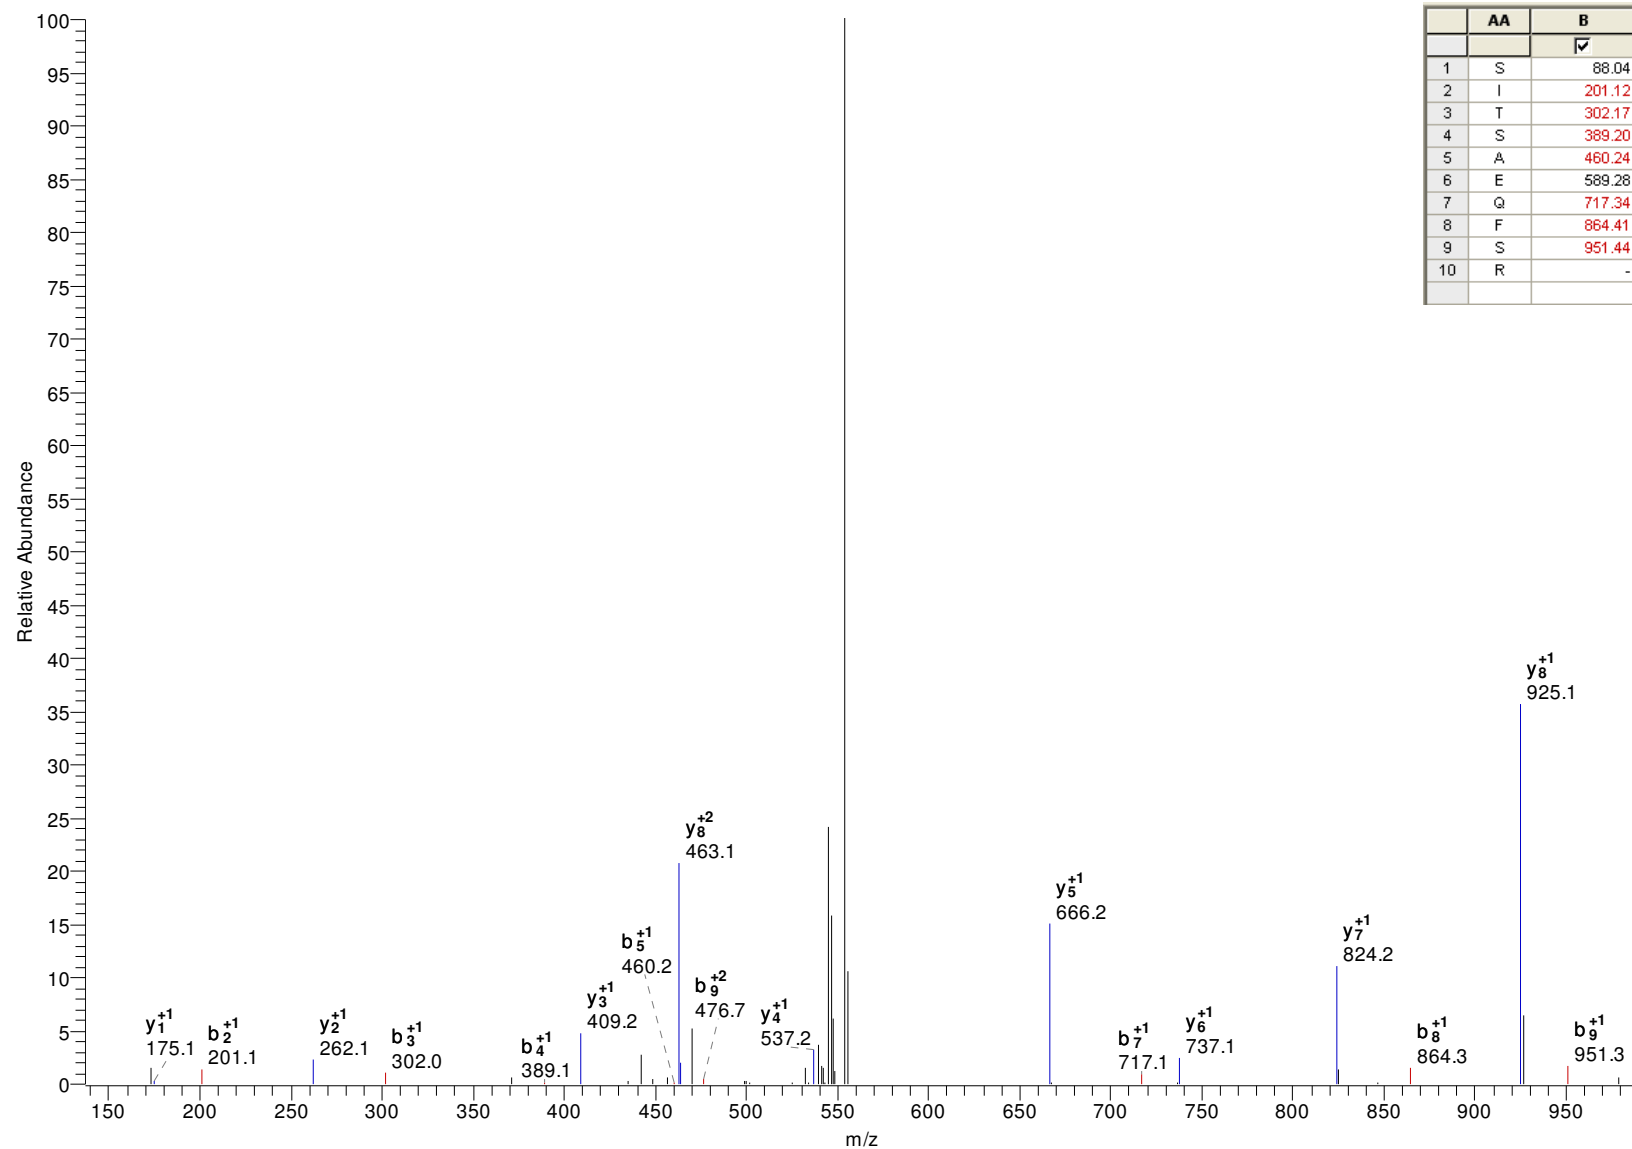

|    | AA | B      | Y       |    |
|----|----|--------|---------|----|
|    |    | ✓      | ✓       |    |
| 1  | S  | 88.04  | -       | 10 |
| 2  | I  | 201.12 | 1038.52 | 9  |
| 3  | T  | 302.17 | 925.44  | 8  |
| 4  | S  | 389.20 | 824.39  | 7  |
| 5  | A  | 460.24 | 737.36  | 6  |
| 6  | E  | 589.28 | 666.32  | 5  |
| 7  | Q  | 717.34 | 537.28  | 4  |
| 8  | F  | 864.41 | 409.22  | 3  |
| 9  | S  | 951.44 | 262.15  | 2  |
| 10 | R  | -      | 175.12  | 1  |

gi|70880431|gb|EAN93529.1| hypothetical protein, conserved [Trypanosoma cruzi]

K.ALSLFEMEALVK.S

M+H=1350.733765

DeltaM=1.54399

z=2

P(pep)=0.000835149

Xcorr=2.64

DCn=0.36

#5712-5712 NL: 4.57E1

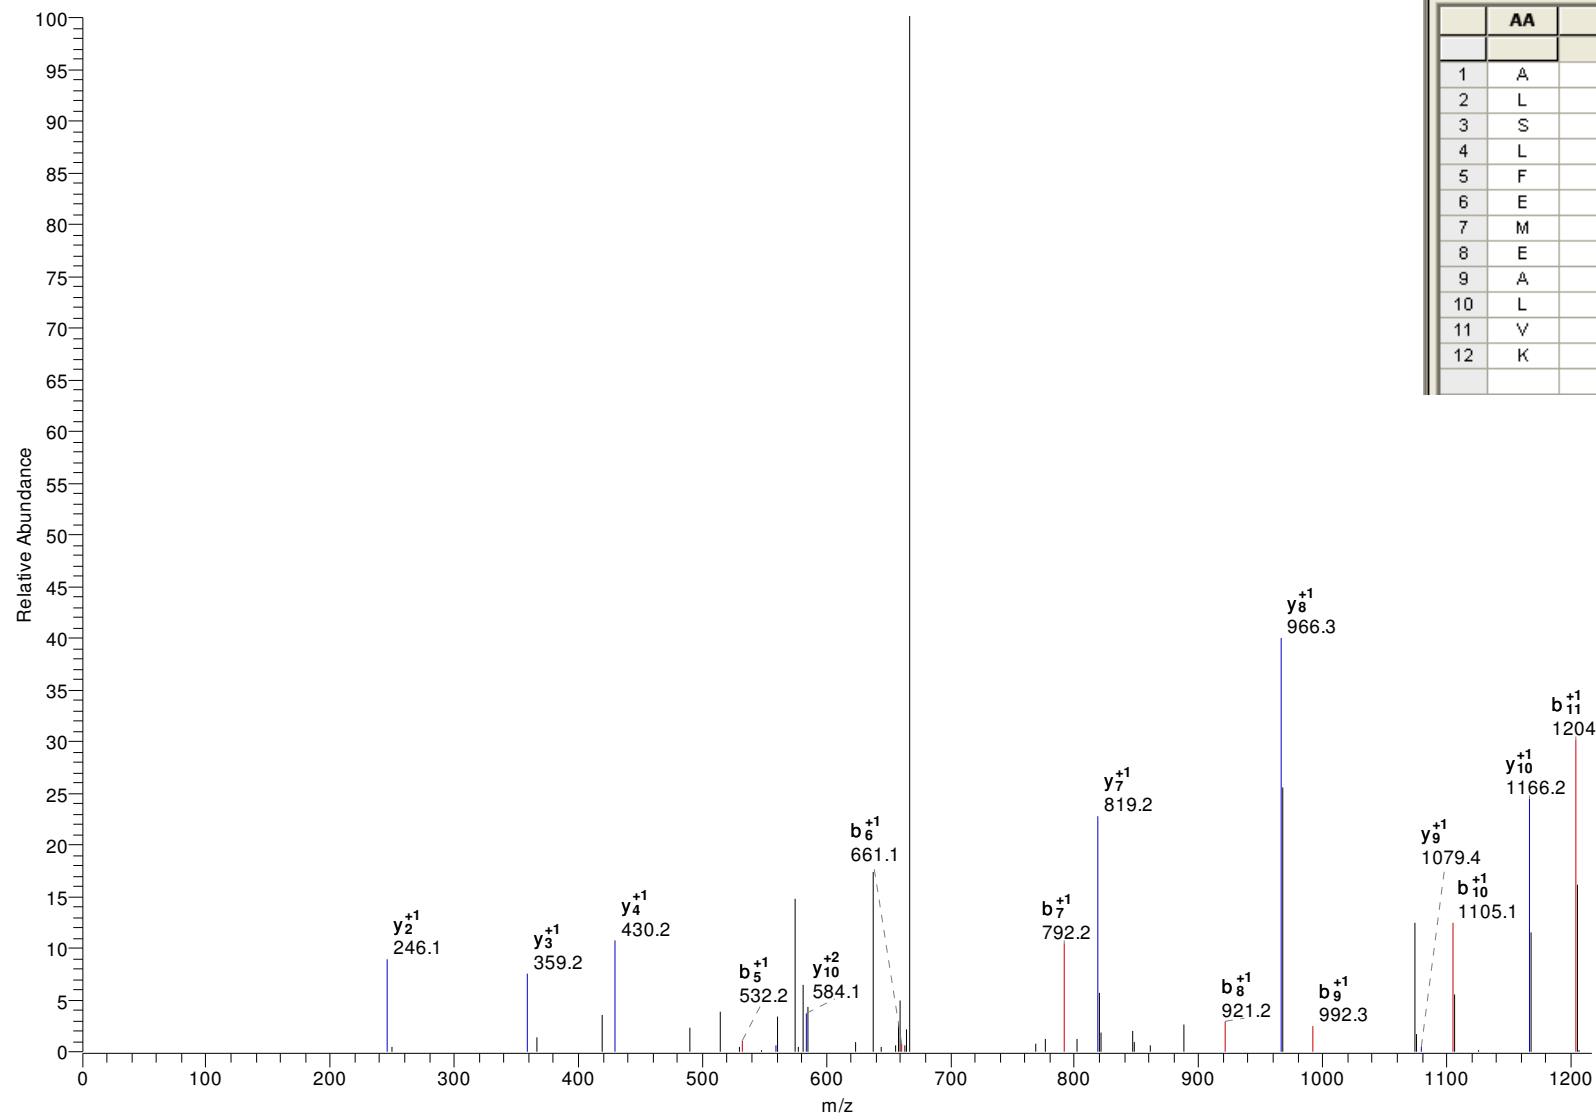

|    | AA | B       | Y       |    |
|----|----|---------|---------|----|
| 1  | A  | 72.04   | -       | 12 |
| 2  | L  | 185.13  | 1279.70 | 11 |
| 3  | S  | 272.16  | 1166.61 | 10 |
| 4  | L  | 385.24  | 1079.58 | 9  |
| 5  | F  | 532.31  | 966.50  | 8  |
| 6  | E  | 661.36  | 819.43  | 7  |
| 7  | M  | 792.40  | 690.39  | 6  |
| 8  | E  | 921.44  | 559.34  | 5  |
| 9  | A  | 992.48  | 430.30  | 4  |
| 10 | L  | 1105.56 | 359.27  | 3  |
| 11 | V  | 1204.63 | 246.18  | 2  |
| 12 | K  | -       | 147.11  | 1  |

gi|70880282|gb|EAN93389.1| hypothetical protein, conserved [Trypanosoma cruzi]

R.EQIQQAYHSVR.Q

M+H=1358.681152

DeltaM=0.89726

z=2

P(pep)=1.98E-06

Xcorr=2.63

DCn=0.35

#2220-2220 NL: 9.74E2

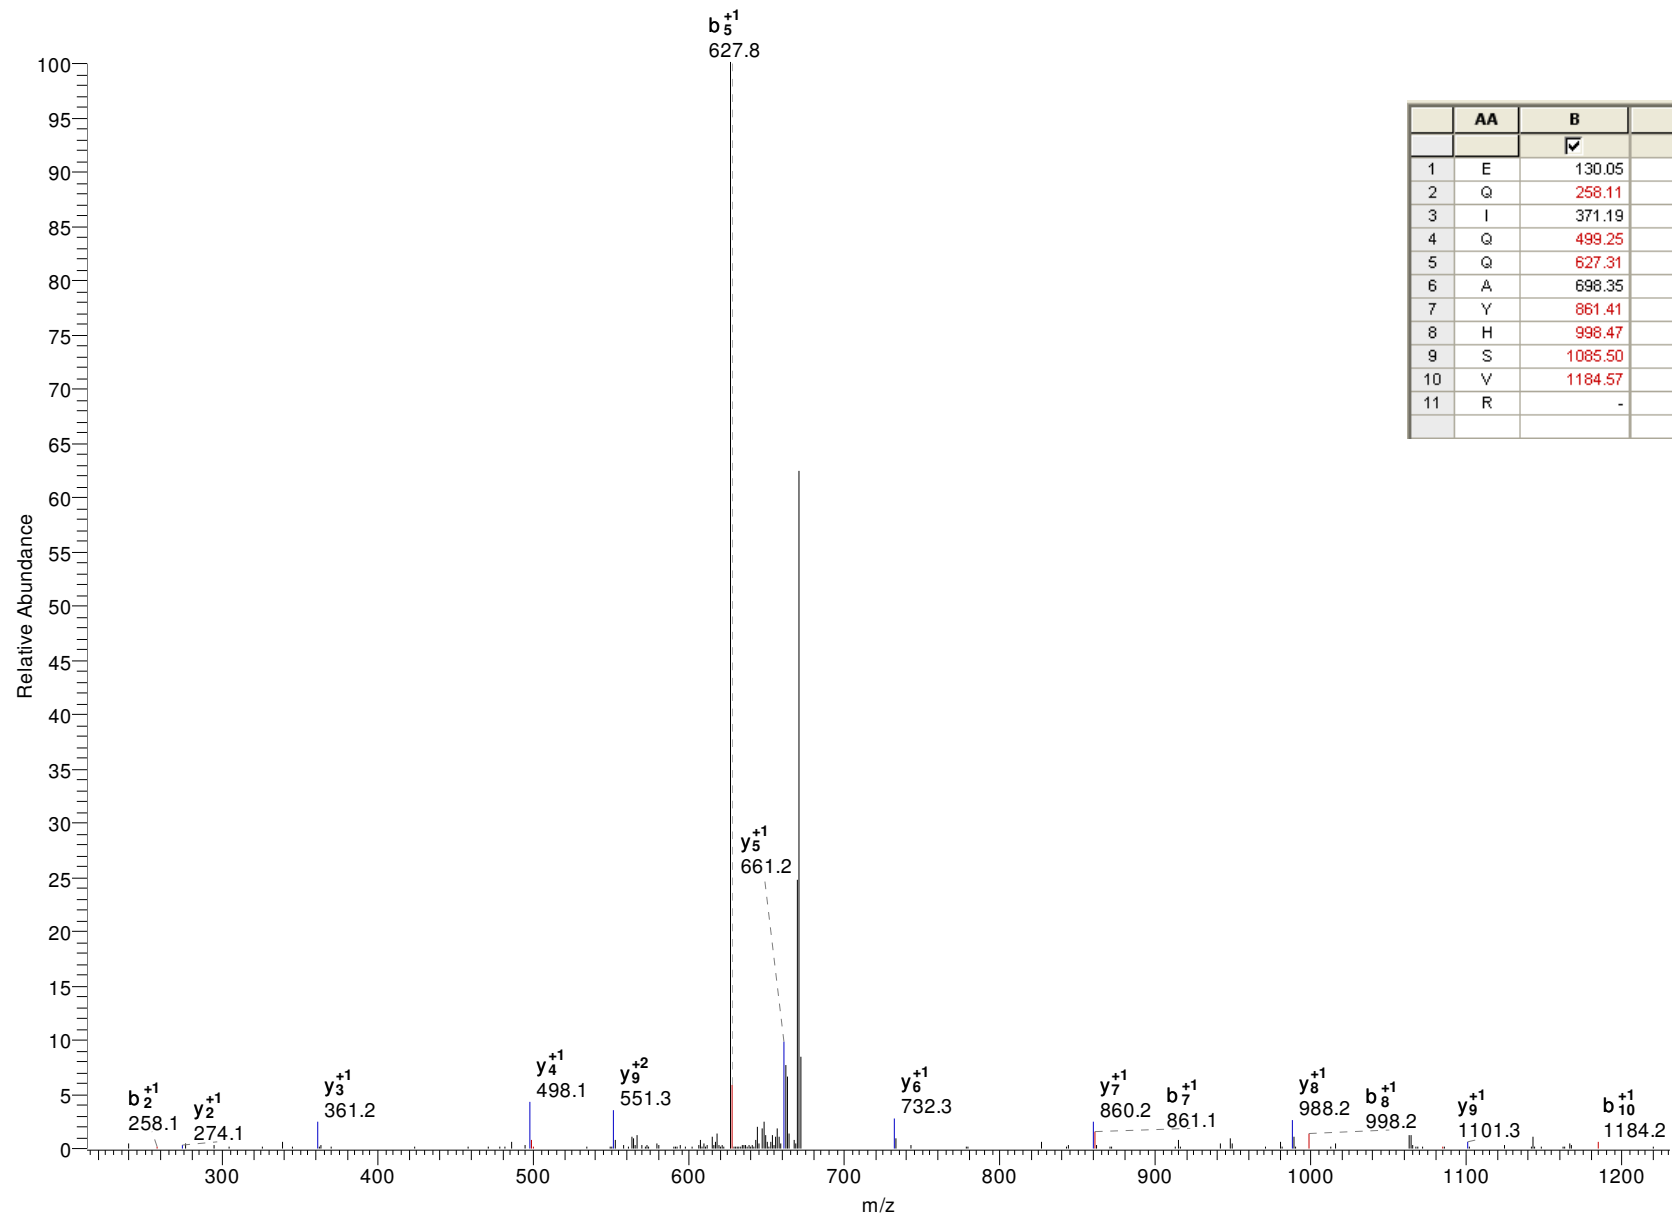

|    | AA | B                                   | Y                                   |    |
|----|----|-------------------------------------|-------------------------------------|----|
|    |    | <input checked="" type="checkbox"/> | <input checked="" type="checkbox"/> |    |
| 1  | E  | 130.05                              | -                                   | 11 |
| 2  | Q  | 258.11                              | 1229.64                             | 10 |
| 3  | I  | 371.19                              | 1101.58                             | 9  |
| 4  | Q  | 499.25                              | 988.50                              | 8  |
| 5  | Q  | 627.31                              | 860.44                              | 7  |
| 6  | A  | 698.35                              | 732.38                              | 6  |
| 7  | Y  | 861.41                              | 661.34                              | 5  |
| 8  | H  | 998.47                              | 498.28                              | 4  |
| 9  | S  | 1085.50                             | 361.22                              | 3  |
| 10 | V  | 1184.57                             | 274.19                              | 2  |
| 11 | R  | -                                   | 175.12                              | 1  |

gi|70869428|gb|EAN84006.1| hypothetical protein, conserved [Trypanosoma cruzi]

R.ASVDNIIGTLK.R

M+H=1130.641602

DeltaM=0.84502

z=2

P(pep)=3.65E-05

Xcorr=2.62

DCn=0.39

#3838-3838 NL: 1.24E2

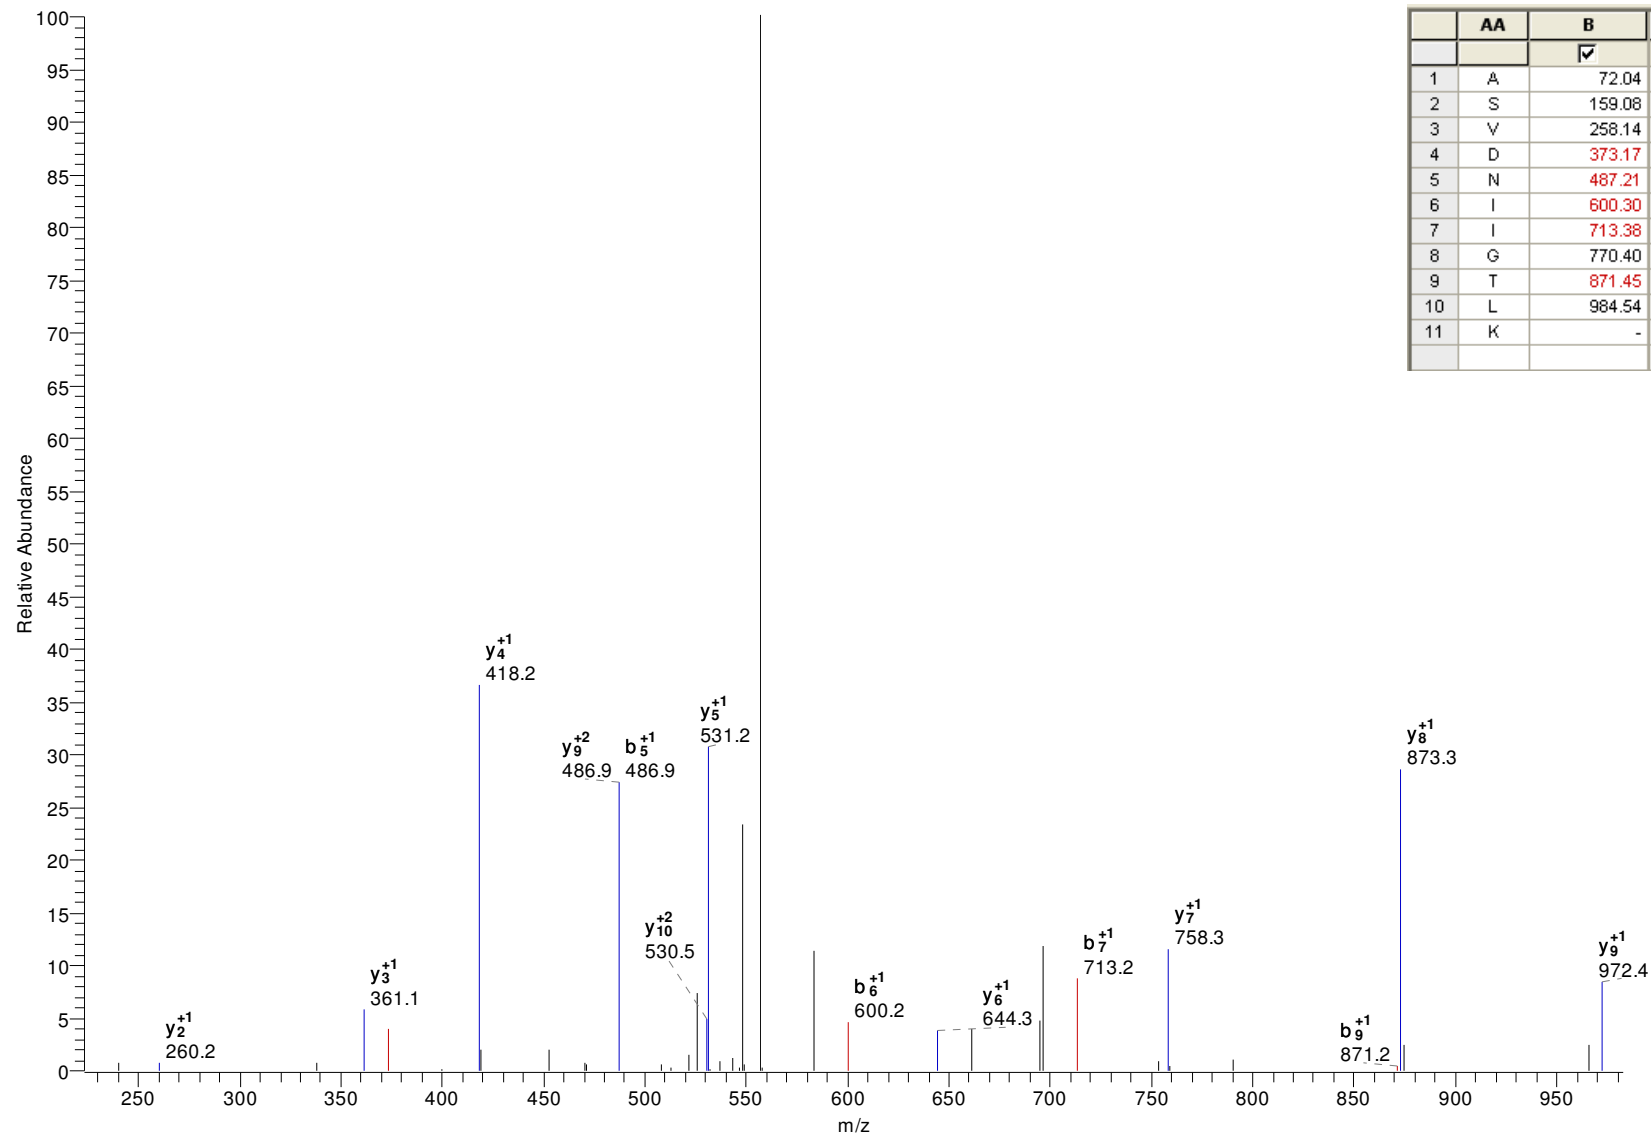

|    | AA | B      | Y       |    |
|----|----|--------|---------|----|
|    |    | ✓      | ✓       |    |
| 1  | A  | 72.04  | -       | 11 |
| 2  | S  | 159.08 | 1059.60 | 10 |
| 3  | V  | 258.14 | 972.57  | 9  |
| 4  | D  | 373.17 | 873.50  | 8  |
| 5  | N  | 487.21 | 758.48  | 7  |
| 6  | I  | 600.30 | 644.43  | 6  |
| 7  | I  | 713.38 | 531.35  | 5  |
| 8  | G  | 770.40 | 418.27  | 4  |
| 9  | T  | 871.45 | 361.24  | 3  |
| 10 | L  | 984.54 | 260.20  | 2  |
| 11 | K  | -      | 147.11  | 1  |

gi|70885574|gb|EAN98386.1| hypothetical protein, conserved [Trypanosoma cruzi]  
R.HFDSLDFK.W M+H=1008.478516 DeltaM=1.35076 z=2  
P(pep)=7.30E-06 Xcorr=2.61 DCn=0.33

#3533-3533 NL: 2.66E2

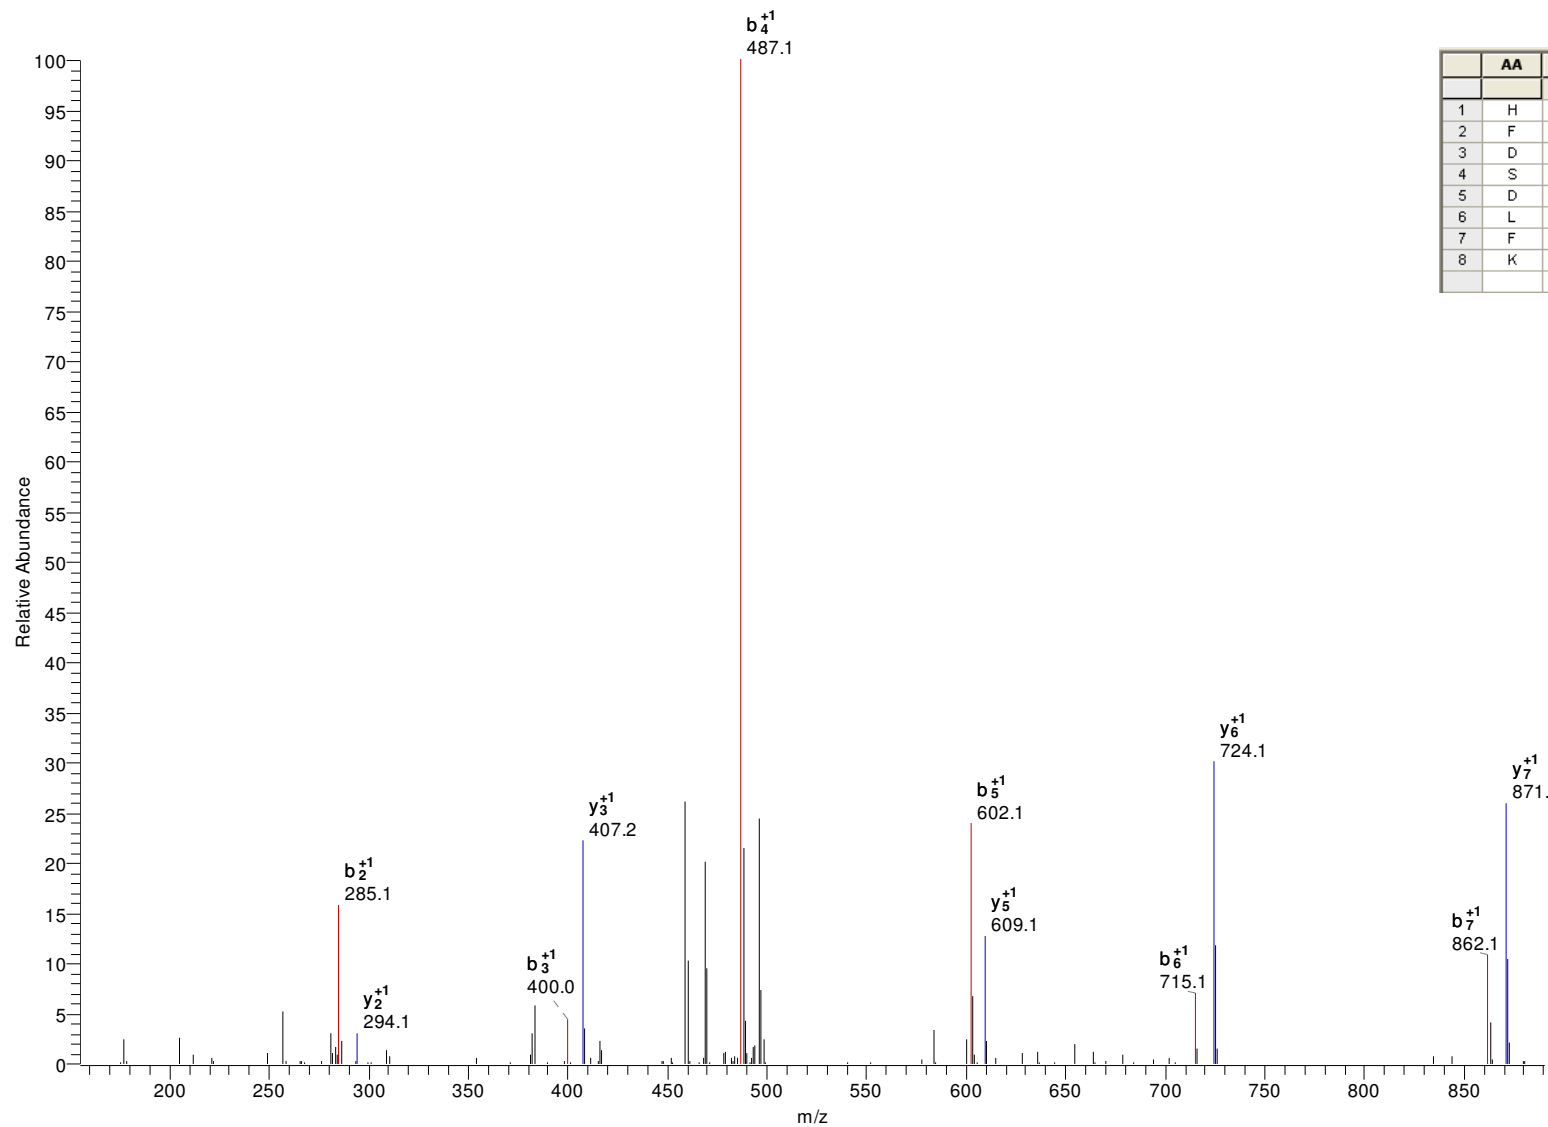

|   | AA | B      | Y      |   |
|---|----|--------|--------|---|
|   |    | ✓      | ✓      |   |
| 1 | H  | 138.07 | -      | 8 |
| 2 | F  | 285.13 | 871.42 | 7 |
| 3 | D  | 400.16 | 724.35 | 6 |
| 4 | S  | 487.19 | 609.32 | 5 |
| 5 | D  | 602.22 | 522.29 | 4 |
| 6 | L  | 715.30 | 407.27 | 3 |
| 7 | F  | 862.37 | 294.18 | 2 |
| 8 | K  | -      | 147.11 | 1 |



gi|10676|emb|CAA30335.1| unnamed protein product [Trypanosoma cruzi]

R.TLADYNIQK.E

M+H=1065.557495

DeltaM=1.82463

z=2

P(pep)=8.78E-06

Xcorr=2.58

DCn=0.44

#2553-2553 NL: 5.77E2

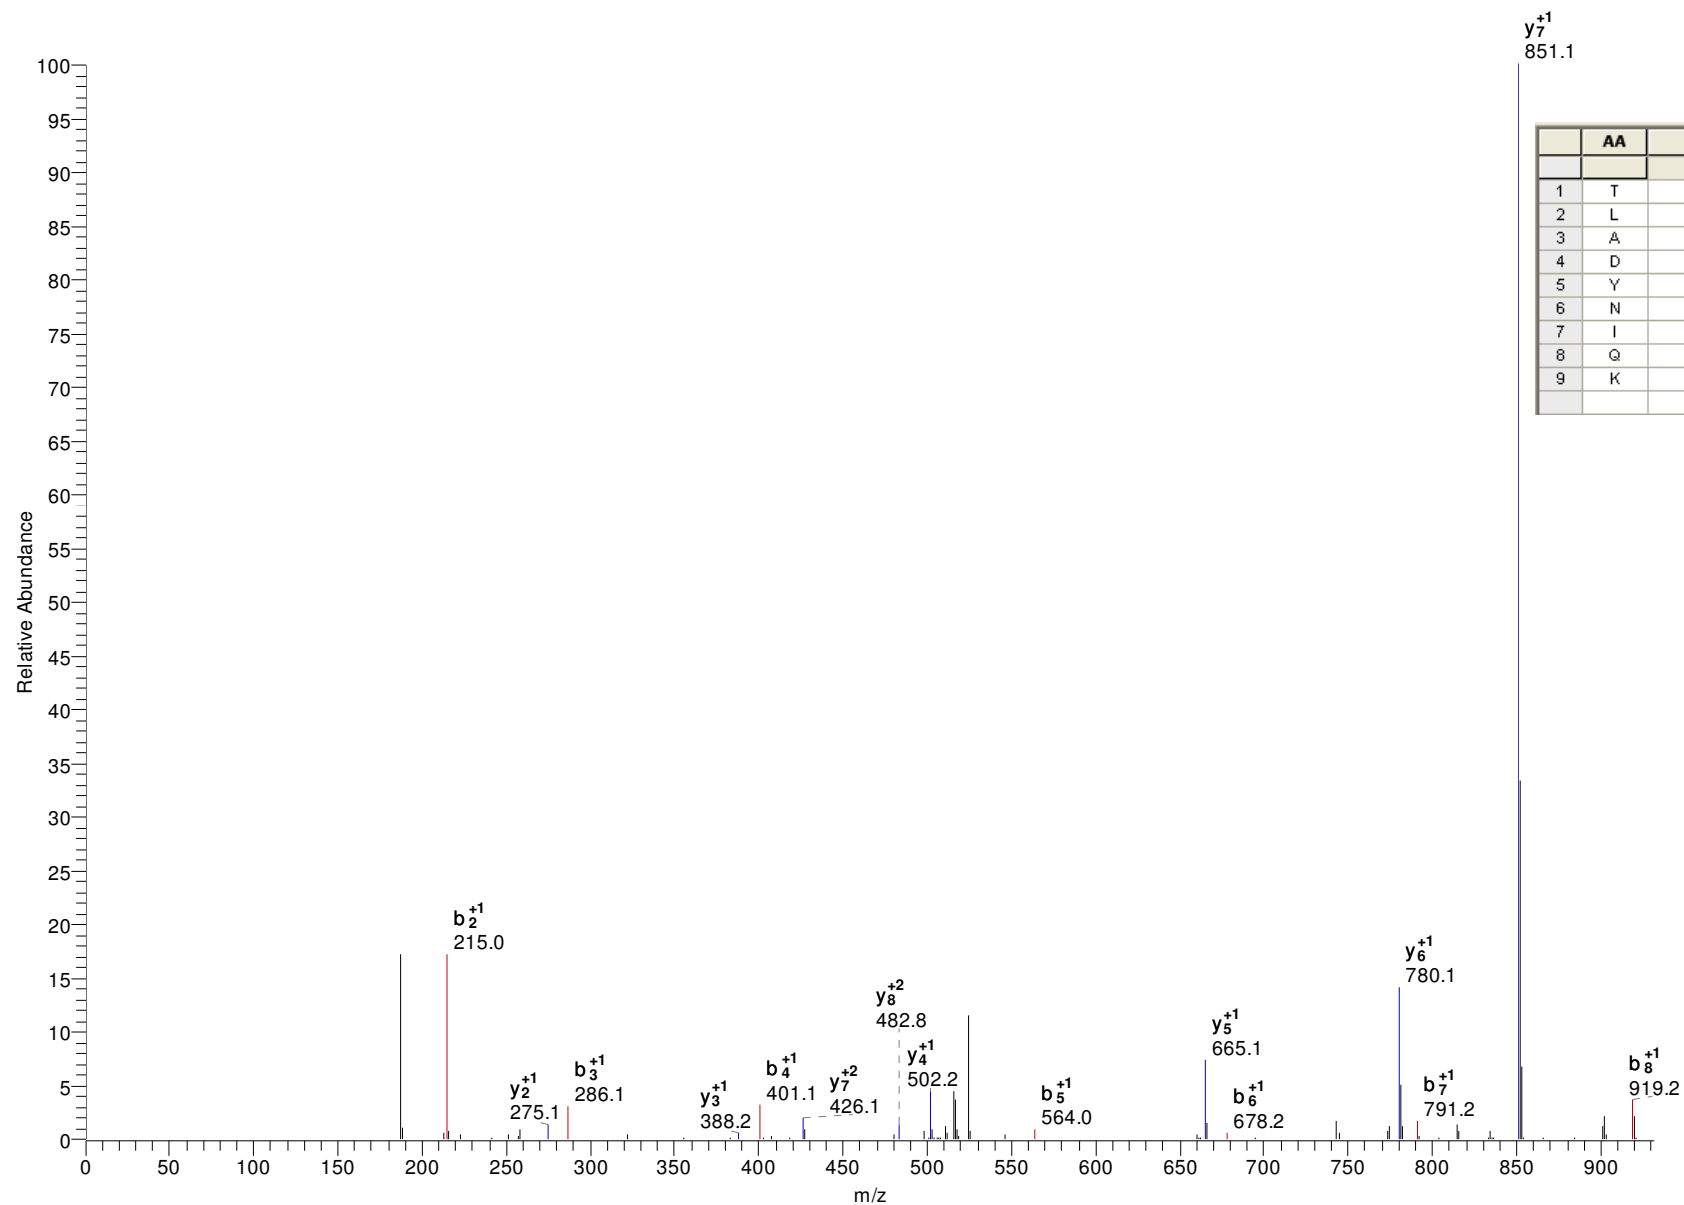

$y_7^{+1}$   
851.1

|   | AA | B      | Y      |   |
|---|----|--------|--------|---|
|   |    | ☑      | ☑      |   |
| 1 | T  | 102.05 | -      | 9 |
| 2 | L  | 215.14 | 964.51 | 8 |
| 3 | A  | 286.18 | 851.43 | 7 |
| 4 | D  | 401.20 | 780.39 | 6 |
| 5 | Y  | 564.27 | 665.36 | 5 |
| 6 | N  | 678.31 | 502.30 | 4 |
| 7 | I  | 791.39 | 388.26 | 3 |
| 8 | Q  | 919.45 | 275.17 | 2 |
| 9 | K  | -      | 147.11 | 1 |

gi|19424456|gb|AAL88739.1|AC104504\_8 Tcc2i18.8 [Trypanosoma cruzi]

R.GLEIDPLLALSEEFFK.T

M+H=1802.942261

DeltaM=1.31731

z=2

P(pep)=8.02E-05

Xcorr=2.57

DCn=0.39

#6575-6575 NL: 2.71E1

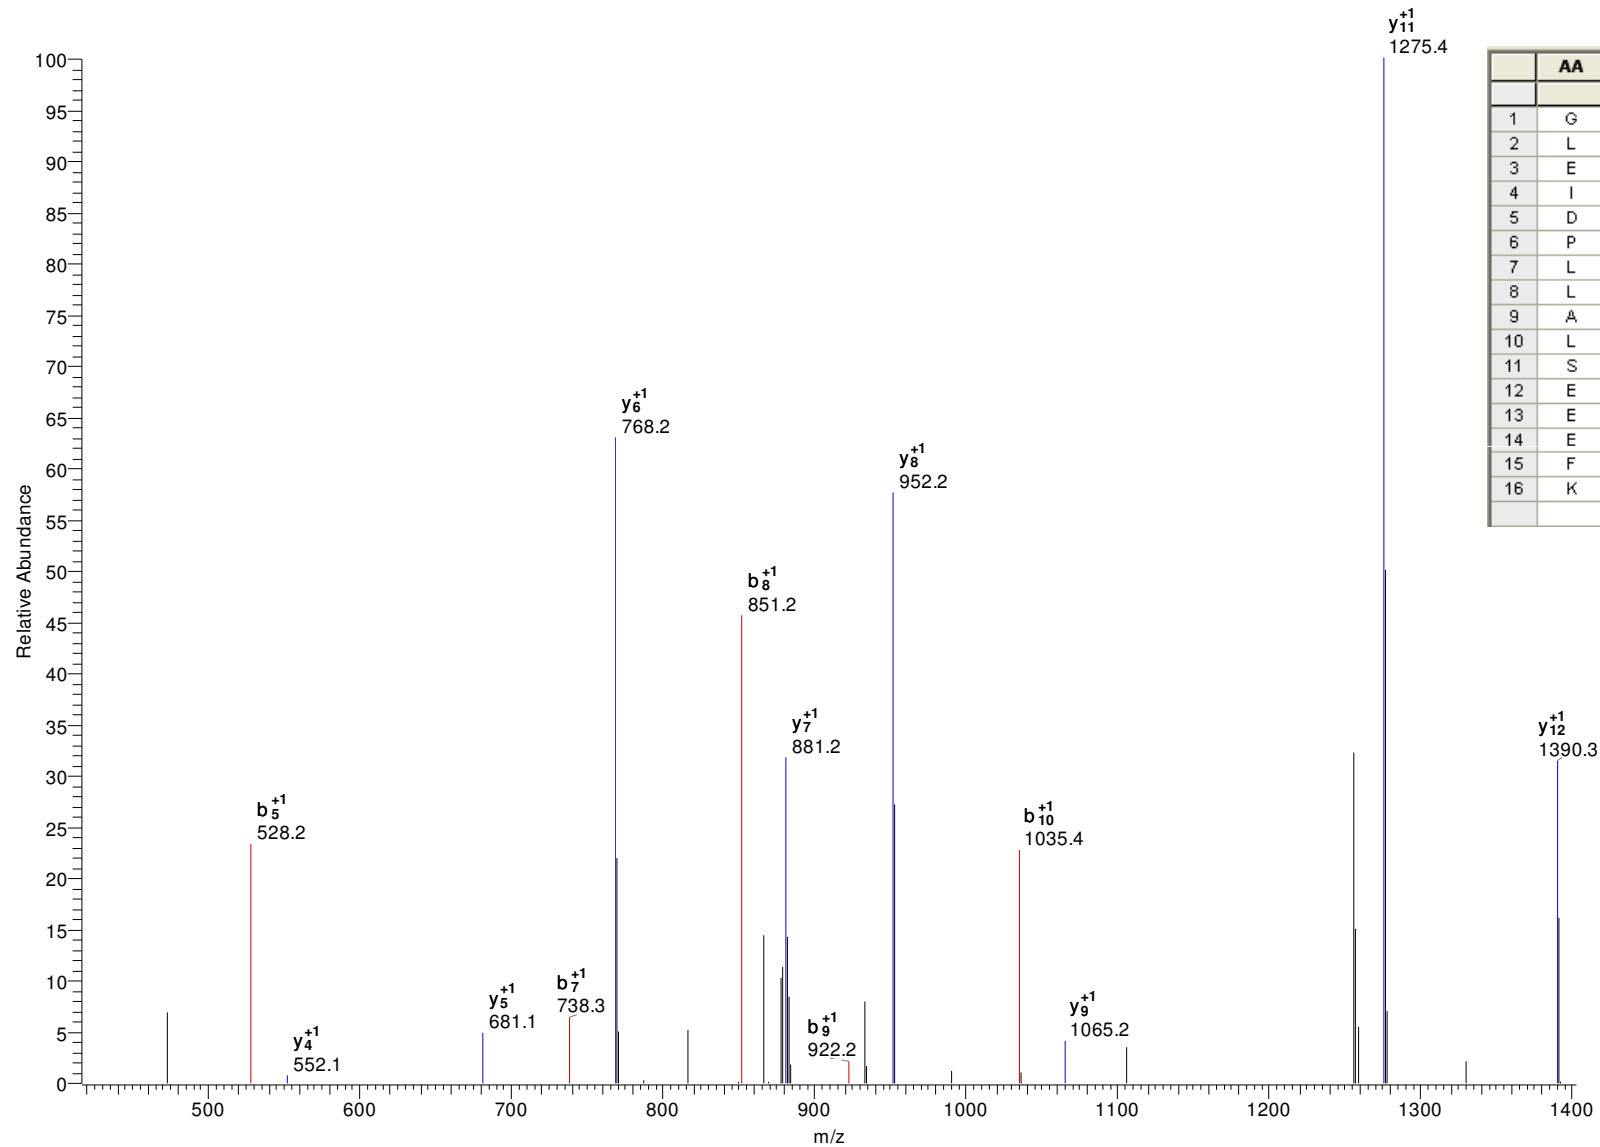

|    | AA | B       | Y       |    |
|----|----|---------|---------|----|
|    |    | ✓       | ✓       |    |
| 1  | G  | 58.03   | -       | 16 |
| 2  | L  | 171.11  | 1745.92 | 15 |
| 3  | E  | 300.16  | 1632.84 | 14 |
| 4  | I  | 413.24  | 1503.79 | 13 |
| 5  | D  | 528.27  | 1390.71 | 12 |
| 6  | P  | 625.32  | 1275.68 | 11 |
| 7  | L  | 738.40  | 1178.63 | 10 |
| 8  | L  | 851.49  | 1065.55 | 9  |
| 9  | A  | 922.52  | 952.46  | 8  |
| 10 | L  | 1035.61 | 881.43  | 7  |
| 11 | S  | 1122.64 | 768.34  | 6  |
| 12 | E  | 1251.68 | 681.31  | 5  |
| 13 | E  | 1380.73 | 552.27  | 4  |
| 14 | E  | 1509.77 | 423.22  | 3  |
| 15 | F  | 1656.84 | 294.18  | 2  |
| 16 | K  | -       | 147.11  | 1  |

gi|70879670|gb|EAN92825.1| hypothetical protein, conserved [Trypanosoma cruzi]

K.AFESHTTTLEDK.S

M+H=1378.64856

DeltaM=0.73992

z=2

P(pep)=0.00066188

Xcorr=2.57

DCn=0.43

#2214-2214 NL: 7.41E2

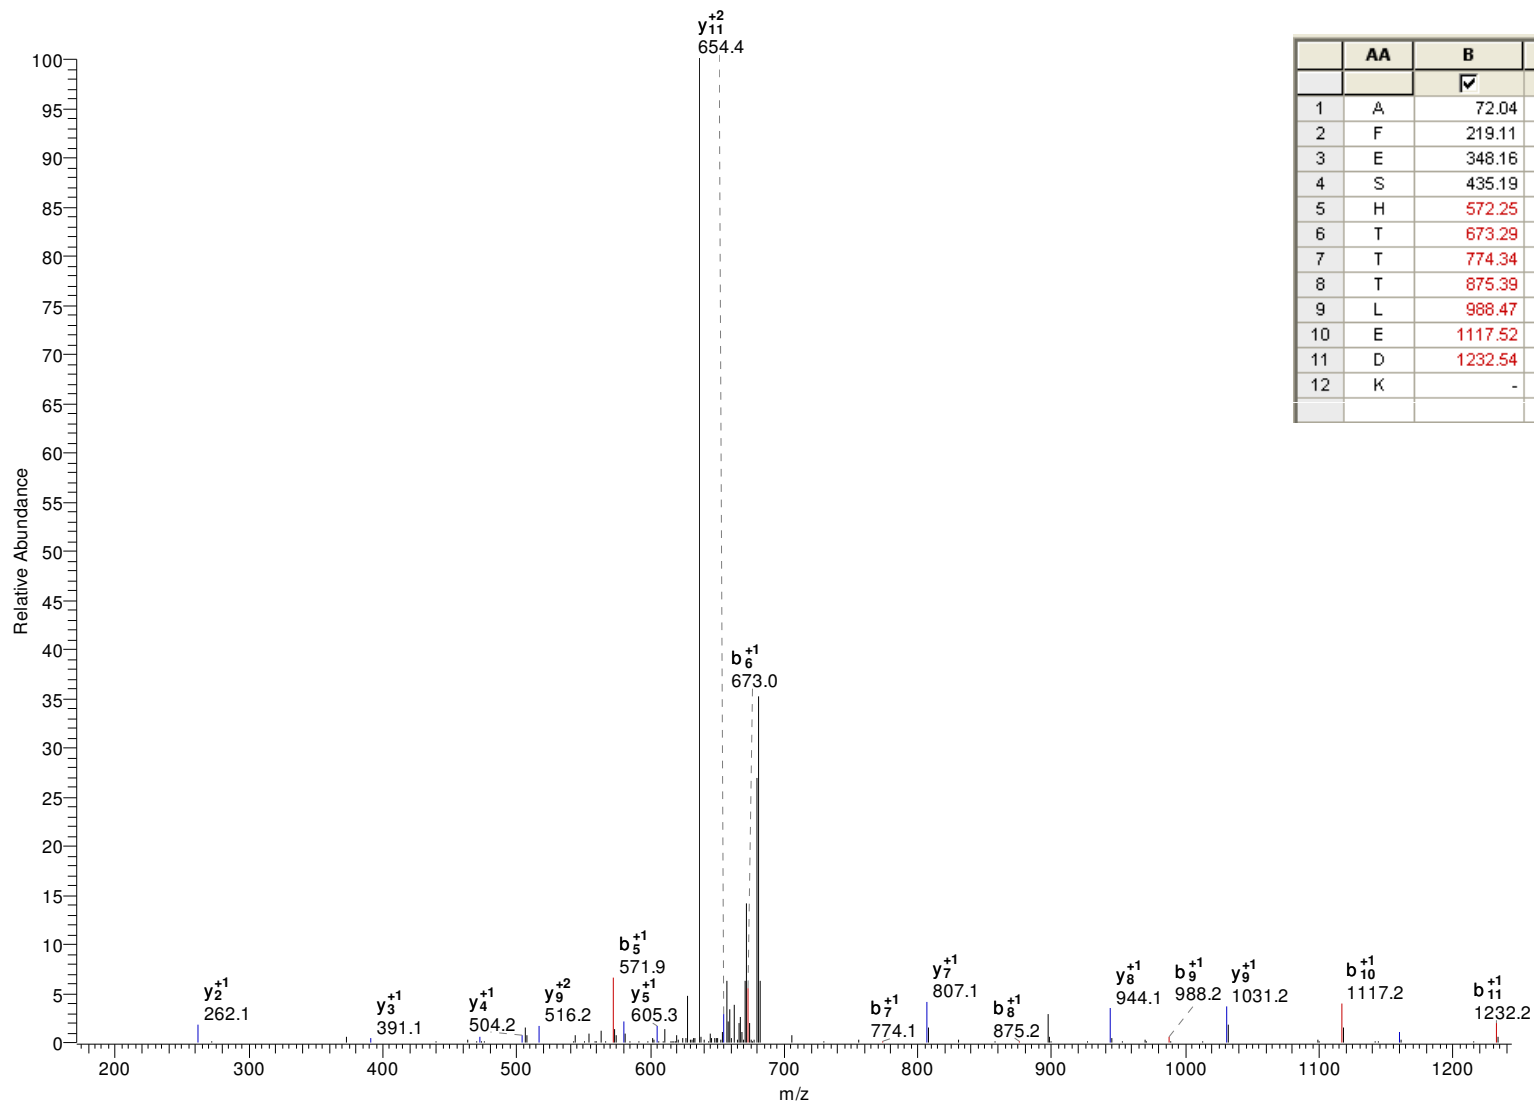

|    | AA | B                                   | Y                                   |    |
|----|----|-------------------------------------|-------------------------------------|----|
|    |    | <input checked="" type="checkbox"/> | <input checked="" type="checkbox"/> |    |
| 1  | A  | 72.04                               | -                                   | 12 |
| 2  | F  | 219.11                              | 1307.61                             | 11 |
| 3  | E  | 348.16                              | 1160.54                             | 10 |
| 4  | S  | 435.19                              | 1031.50                             | 9  |
| 5  | H  | 572.25                              | 944.47                              | 8  |
| 6  | T  | 673.29                              | 807.41                              | 7  |
| 7  | T  | 774.34                              | 706.36                              | 6  |
| 8  | T  | 875.39                              | 605.31                              | 5  |
| 9  | L  | 988.47                              | 504.27                              | 4  |
| 10 | E  | 1117.52                             | 391.18                              | 3  |
| 11 | D  | 1232.54                             | 262.14                              | 2  |
| 12 | K  | -                                   | 147.11                              | 1  |

gi|70878726|gb|EAN91956.1| aldehyde dehydrogenase, putative [Trypanosoma cruzi]

R.YSAPTITVPLPR.T

M+H=1314.741577

DeltaM=0.25041

z=2

P(pep)=1.09E-05

Xcorr=2.56

DCn=0.44

#3862-3862 NL: 9.88E1

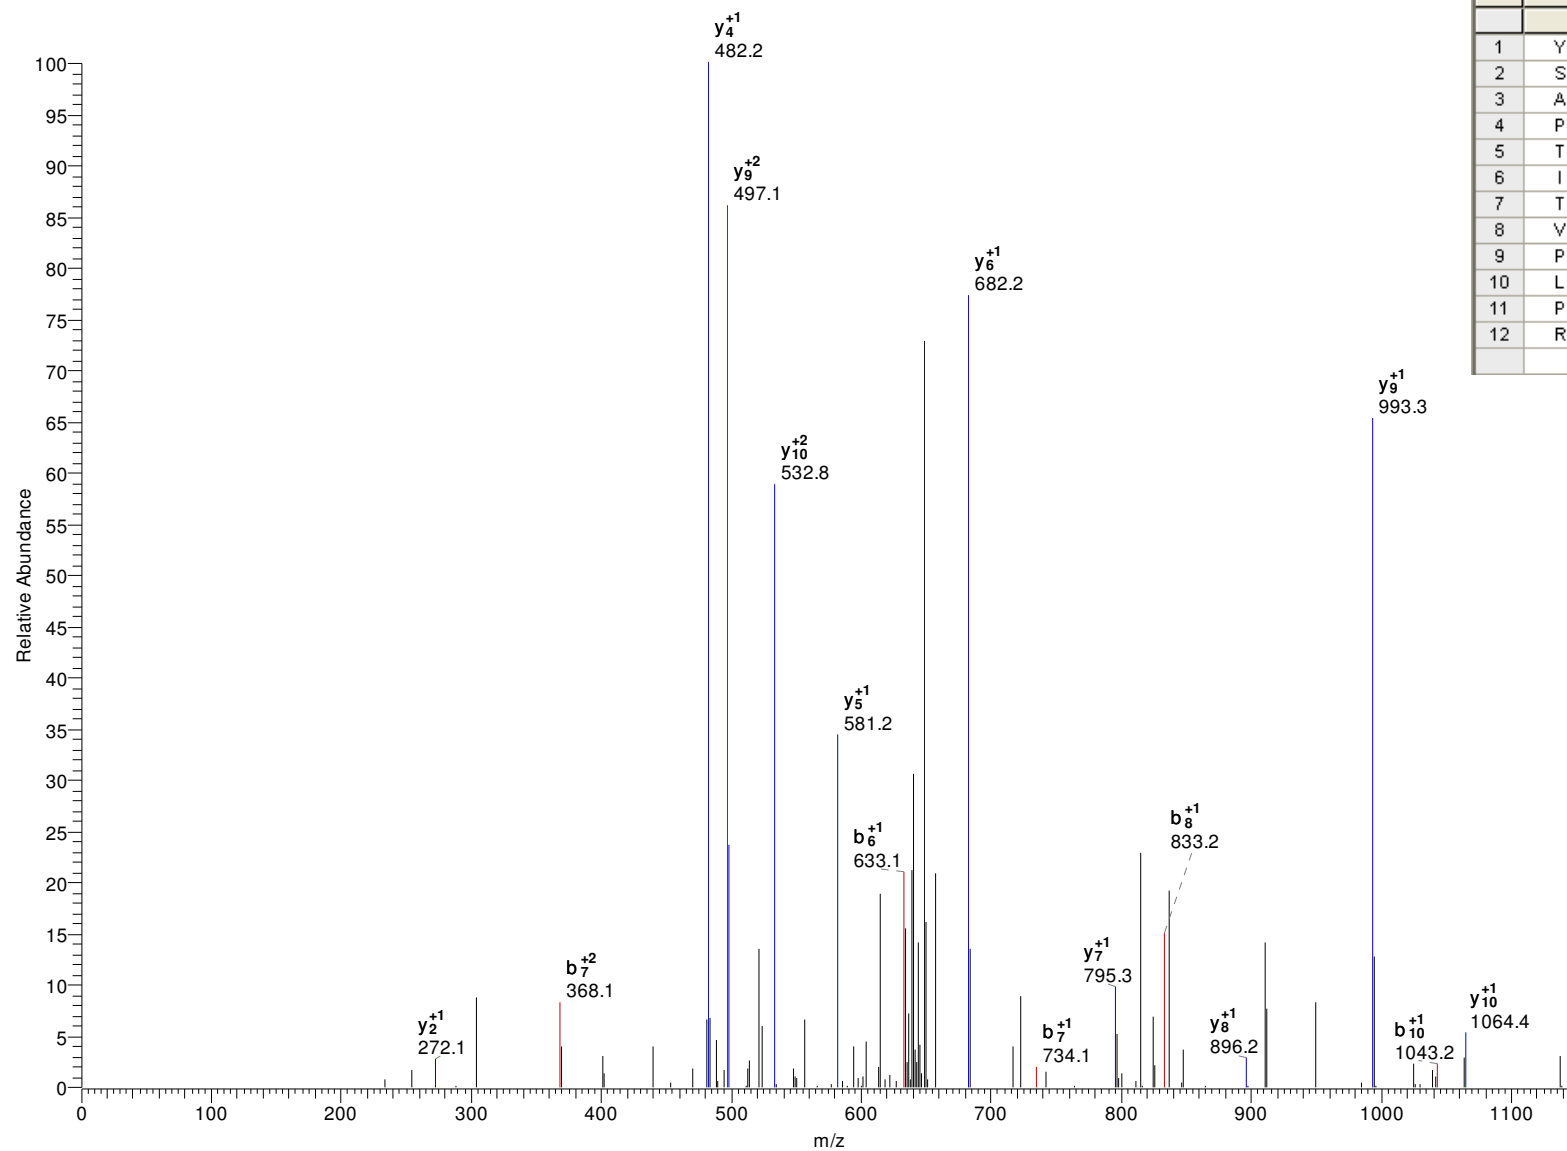

|    | AA | B       | Y       |    |
|----|----|---------|---------|----|
| 1  | Y  | 164.07  | -       | 12 |
| 2  | S  | 251.10  | 1151.68 | 11 |
| 3  | A  | 322.14  | 1064.65 | 10 |
| 4  | P  | 419.19  | 993.61  | 9  |
| 5  | T  | 520.24  | 896.56  | 8  |
| 6  | I  | 633.32  | 795.51  | 7  |
| 7  | T  | 734.37  | 682.42  | 6  |
| 8  | V  | 833.44  | 581.38  | 5  |
| 9  | P  | 930.49  | 482.31  | 4  |
| 10 | L  | 1043.58 | 385.26  | 3  |
| 11 | P  | 1140.63 | 272.17  | 2  |
| 12 | R  | -       | 175.12  | 1  |

gi|1682979|gb|AH004308.1| tyrosine aminotransferase; TAT [Trypanosoma cruzi]

-.AITAICDAGDYALVPQPGFPHYETVCK.A

M+H=2993.417236

DeltaM=1.29868

z=3

P(pep)=6.40E-05

Xcorr=2.52

DCn=0.43

#4809-4809 NL: 1.22E2

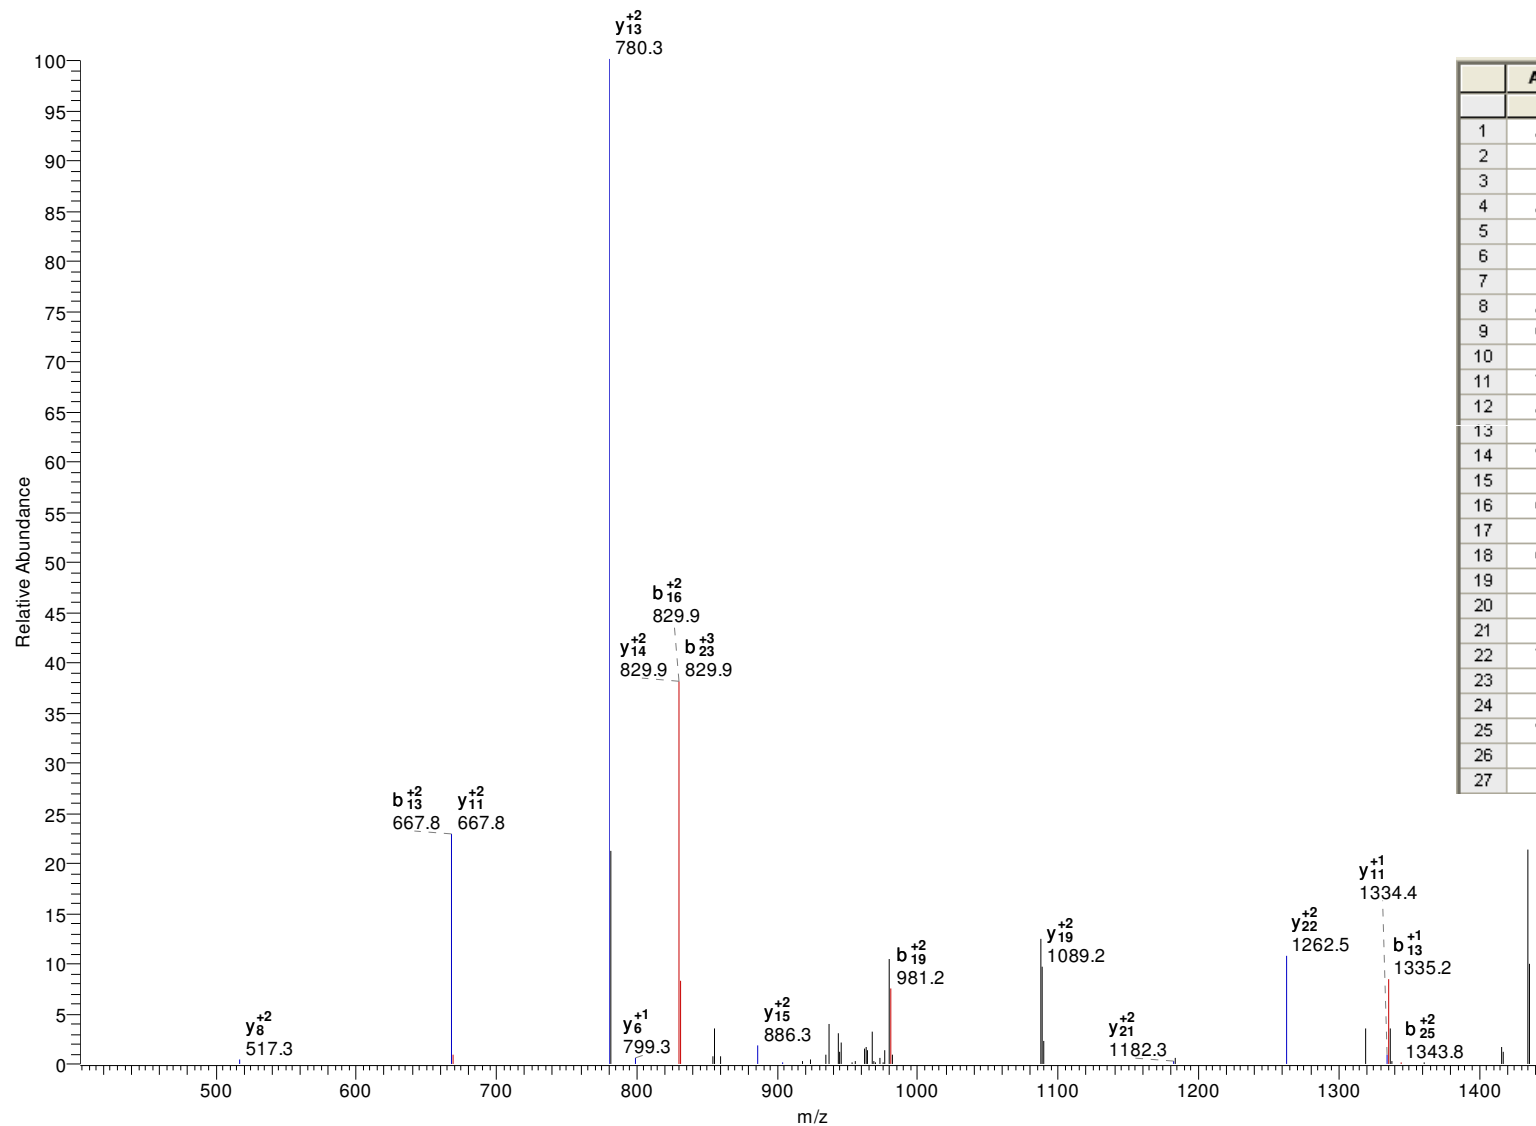

|    | AA | B                                   | Y                                   |    |
|----|----|-------------------------------------|-------------------------------------|----|
|    |    | <input checked="" type="checkbox"/> | <input checked="" type="checkbox"/> |    |
| 1  | A  | 36.53                               | -                                   | 27 |
| 2  | I  | 93.07                               | 1461.69                             | 26 |
| 3  | T  | 143.59                              | 1405.15                             | 25 |
| 4  | A  | 179.11                              | 1354.63                             | 24 |
| 5  | I  | 235.65                              | 1319.11                             | 23 |
| 6  | C  | 315.67                              | 1262.57                             | 22 |
| 7  | D  | 373.18                              | 1182.55                             | 21 |
| 8  | A  | 408.70                              | 1125.04                             | 20 |
| 9  | G  | 437.21                              | 1089.52                             | 19 |
| 10 | D  | 494.72                              | 1061.01                             | 18 |
| 11 | Y  | 576.26                              | 1003.50                             | 17 |
| 12 | A  | 611.77                              | 921.96                              | 16 |
| 13 | L  | 668.32                              | 886.45                              | 15 |
| 14 | V  | 717.85                              | 829.90                              | 14 |
| 15 | P  | 766.38                              | 780.37                              | 13 |
| 16 | Q  | 830.41                              | 731.84                              | 12 |
| 17 | P  | 878.93                              | 667.81                              | 11 |
| 18 | G  | 907.44                              | 619.29                              | 10 |
| 19 | F  | 980.98                              | 590.78                              | 9  |
| 20 | P  | 1029.50                             | 517.24                              | 8  |
| 21 | H  | 1098.03                             | 468.72                              | 7  |
| 22 | Y  | 1179.56                             | 400.19                              | 6  |
| 23 | E  | 1244.09                             | 318.65                              | 5  |
| 24 | T  | 1294.61                             | 254.13                              | 4  |
| 25 | V  | 1344.14                             | 203.61                              | 3  |
| 26 | C  | 1424.16                             | 154.08                              | 2  |
| 27 | K  | -                                   | 74.06                               | 1  |

gi|70876272|gb|EAN89743.1| hypothetical protein, conserved [Trypanosoma cruzi]  
K.HMTPSEALQK.H M+H=1141.567017 DeltaM=1.03020 z=2  
P(pep)=7.60E-06 Xcorr=2.51 DCn=0.41

#2206-2206 NL: 6.94E2

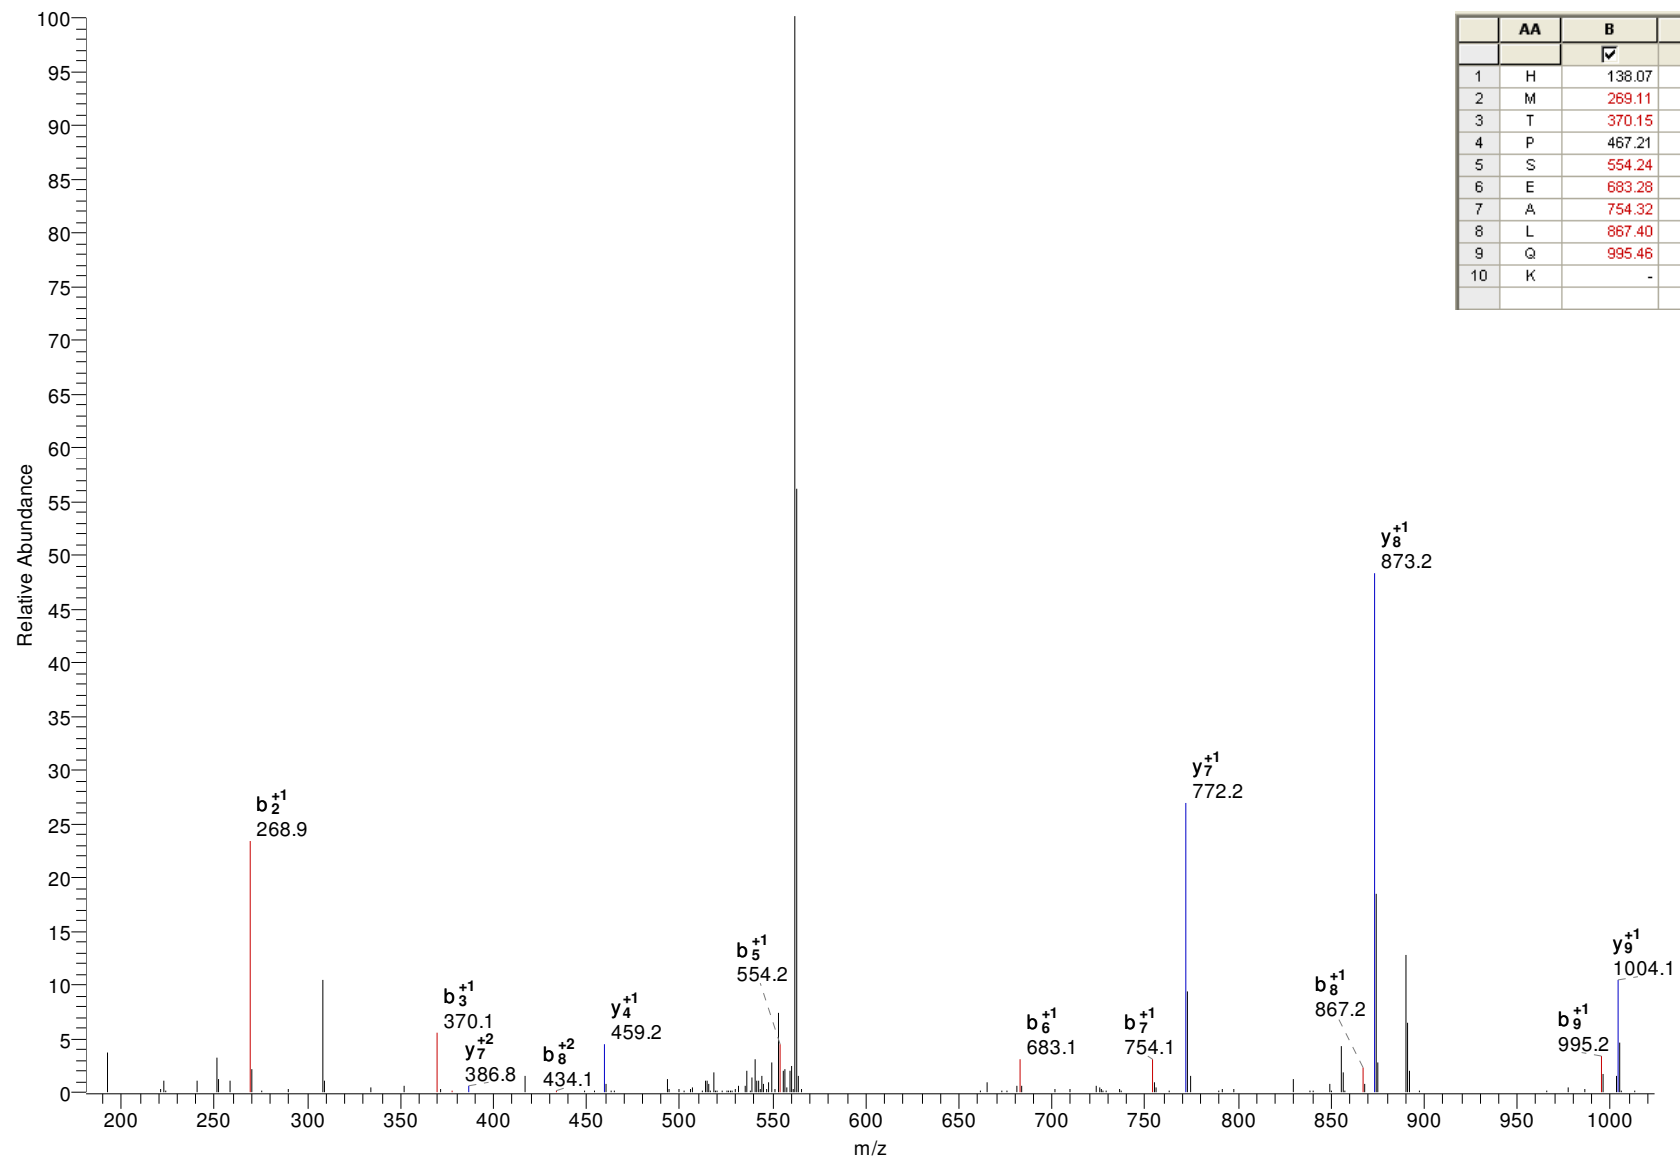

|    | AA | B      | Y       |    |
|----|----|--------|---------|----|
|    |    | ✓      | ✓       |    |
| 1  | H  | 138.07 | -       | 10 |
| 2  | M  | 269.11 | 1004.51 | 9  |
| 3  | T  | 370.15 | 873.47  | 8  |
| 4  | P  | 467.21 | 772.42  | 7  |
| 5  | S  | 554.24 | 675.37  | 6  |
| 6  | E  | 683.28 | 588.34  | 5  |
| 7  | A  | 754.32 | 459.29  | 4  |
| 8  | L  | 867.40 | 388.26  | 3  |
| 9  | Q  | 995.46 | 275.17  | 2  |
| 10 | K  | -      | 147.11  | 1  |

gi|70874895|gb|EAN88524.1| 3-ketoacyl-CoA thiolase, putative [Trypanosoma cruzi]

K.TLEELLADAINGALEK.T

M+H=1699.911255

DeltaM=1.61284

z=2

P(pep)=2.94E-06

Xcorr=2.41

DCn=0.14

#6498-6500 NL:7.28E1

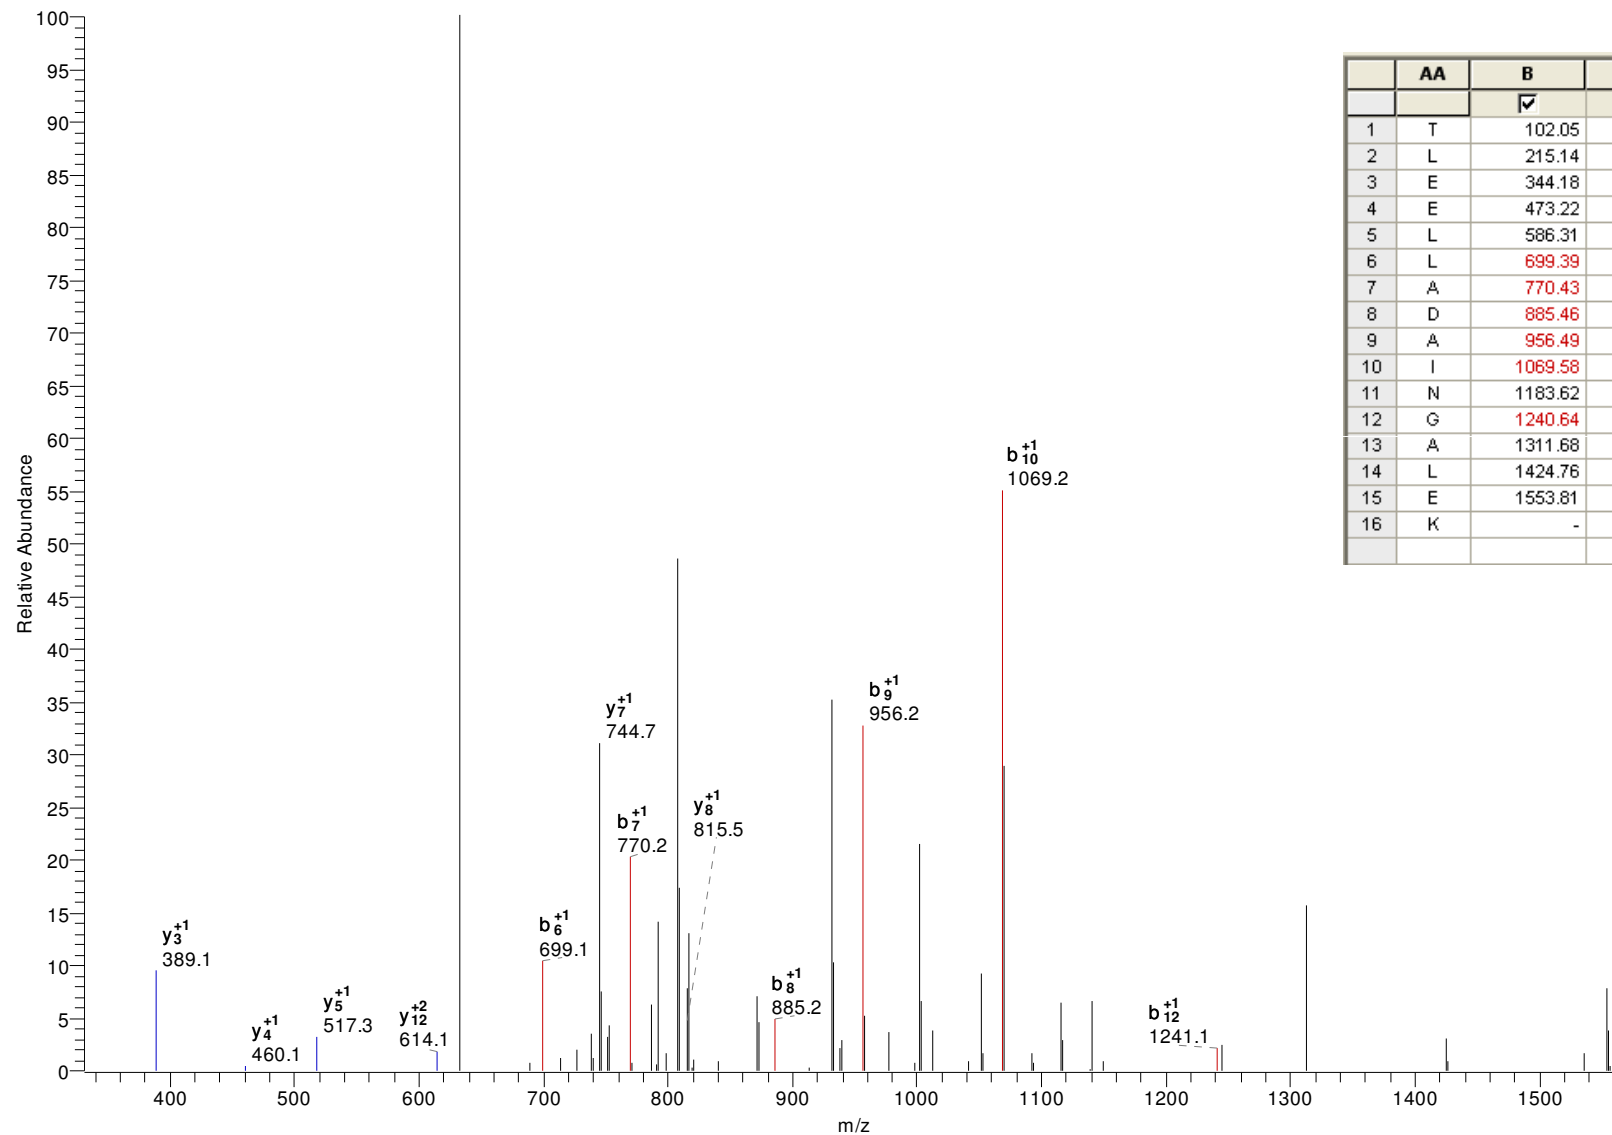

|    | AA | B                                   | Y                                   |    |
|----|----|-------------------------------------|-------------------------------------|----|
|    |    | <input checked="" type="checkbox"/> | <input checked="" type="checkbox"/> |    |
| 1  | T  | 102.05                              | -                                   | 16 |
| 2  | L  | 215.14                              | 1598.86                             | 15 |
| 3  | E  | 344.18                              | 1485.78                             | 14 |
| 4  | E  | 473.22                              | 1356.74                             | 13 |
| 5  | L  | 586.31                              | 1227.69                             | 12 |
| 6  | L  | 699.39                              | 1114.61                             | 11 |
| 7  | A  | 770.43                              | 1001.53                             | 10 |
| 8  | D  | 885.46                              | 930.49                              | 9  |
| 9  | A  | 956.49                              | 815.46                              | 8  |
| 10 | I  | 1069.58                             | 744.43                              | 7  |
| 11 | N  | 1183.62                             | 631.34                              | 6  |
| 12 | G  | 1240.64                             | 517.30                              | 5  |
| 13 | A  | 1311.68                             | 460.28                              | 4  |
| 14 | L  | 1424.76                             | 389.24                              | 3  |
| 15 | E  | 1553.81                             | 276.16                              | 2  |
| 16 | K  | -                                   | 147.11                              | 1  |

gi|70874252|gb|EAN87963.1| cytoskeleton-associated protein CAP5.5, putative [Trypanosoma cruzi]

R.QLLQVLTQAATEELQR.V

M+H=1784.950073

DeltaM=1.10100

z=2

P(pep)=9.28E-05

Xcorr=2.43

DCn=0.45

#4790-4790 NL: 2.54E1

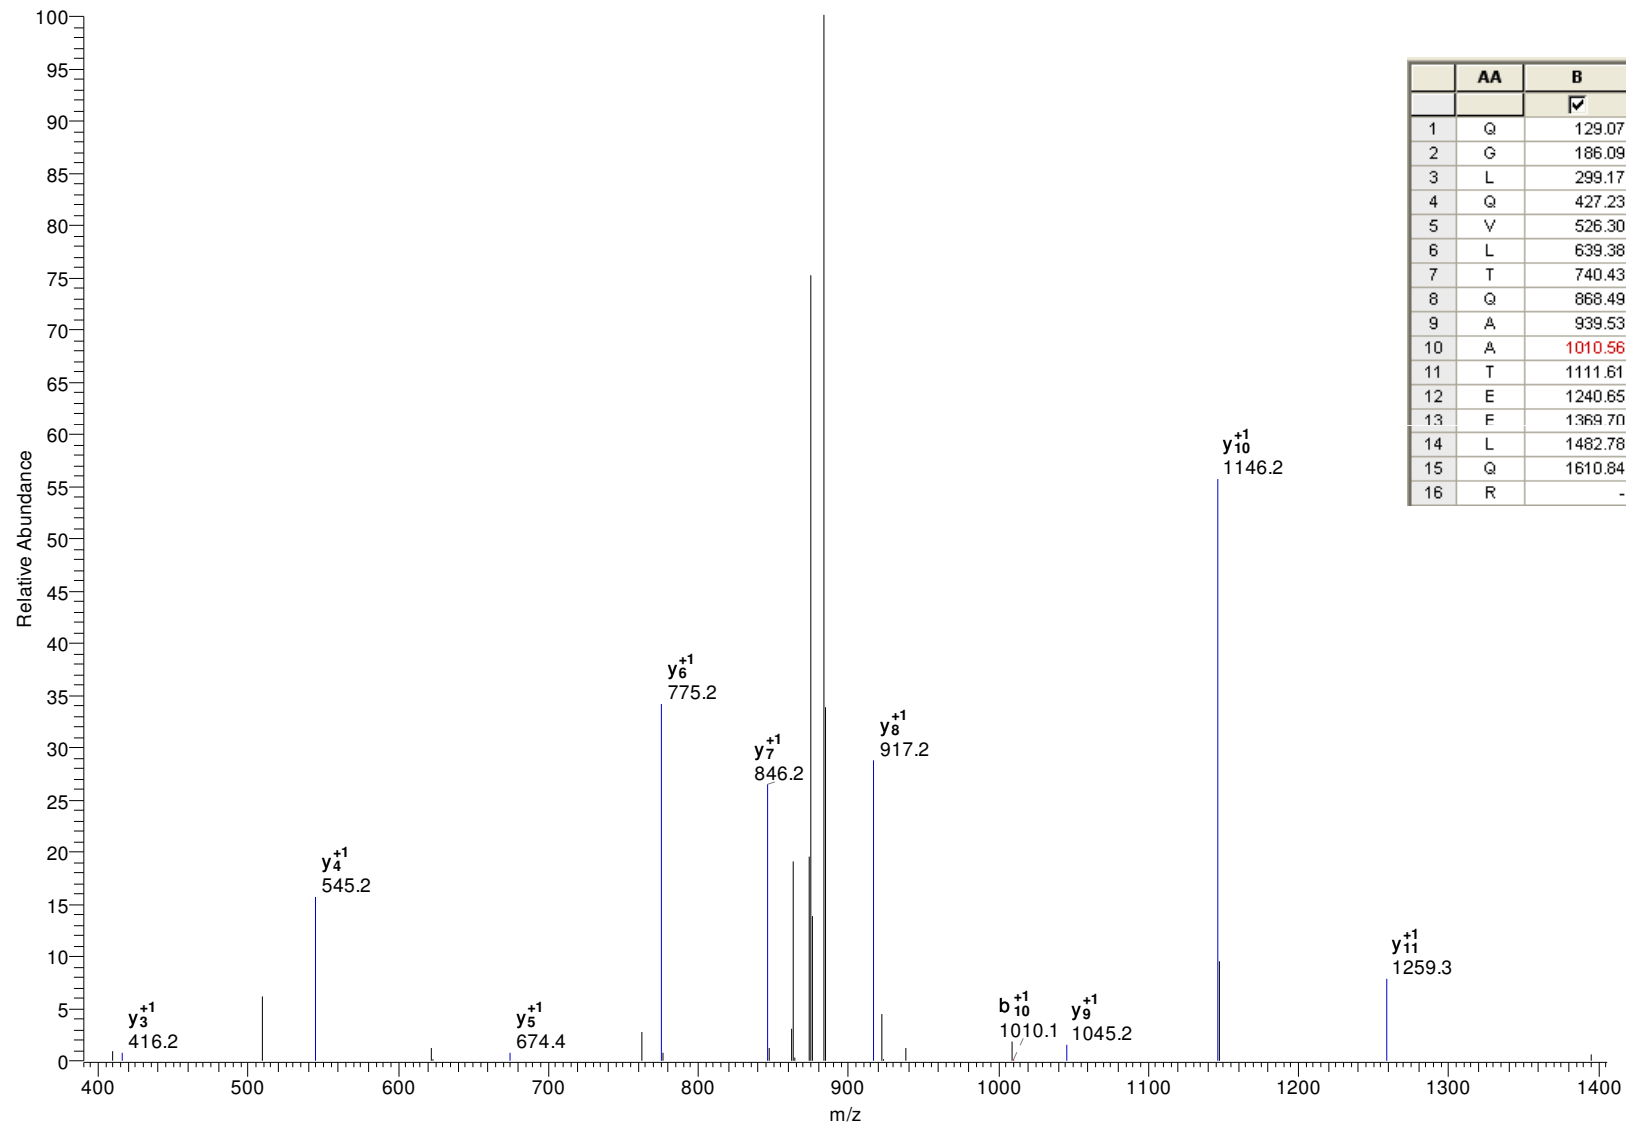

|    | AA | B       | Y       |    |
|----|----|---------|---------|----|
|    |    | ✓       | ✓       |    |
| 1  | Q  | 129.07  | -       | 16 |
| 2  | G  | 186.09  | 1656.89 | 15 |
| 3  | L  | 299.17  | 1599.87 | 14 |
| 4  | Q  | 427.23  | 1486.79 | 13 |
| 5  | V  | 526.30  | 1358.73 | 12 |
| 6  | L  | 639.38  | 1259.66 | 11 |
| 7  | T  | 740.43  | 1146.57 | 10 |
| 8  | Q  | 868.49  | 1045.53 | 9  |
| 9  | A  | 939.53  | 917.47  | 8  |
| 10 | A  | 1010.56 | 846.43  | 7  |
| 11 | T  | 1111.61 | 775.39  | 6  |
| 12 | E  | 1240.65 | 674.35  | 5  |
| 13 | F  | 1369.70 | 545.30  | 4  |
| 14 | L  | 1482.78 | 416.26  | 3  |
| 15 | Q  | 1610.84 | 303.18  | 2  |
| 16 | R  | -       | 175.12  | 1  |



gi|70885630|gb|EAN98441.1| hypothetical protein, conserved [Trypanosoma cruzi]

R.YGVISLLETAVR.A

M+H=1320.752197

DeltaM=1.49541

z=2

P(pep)=0.000152472

Xcorr=2.41

DCn=0.30

#6597-6597 NL: 6.22

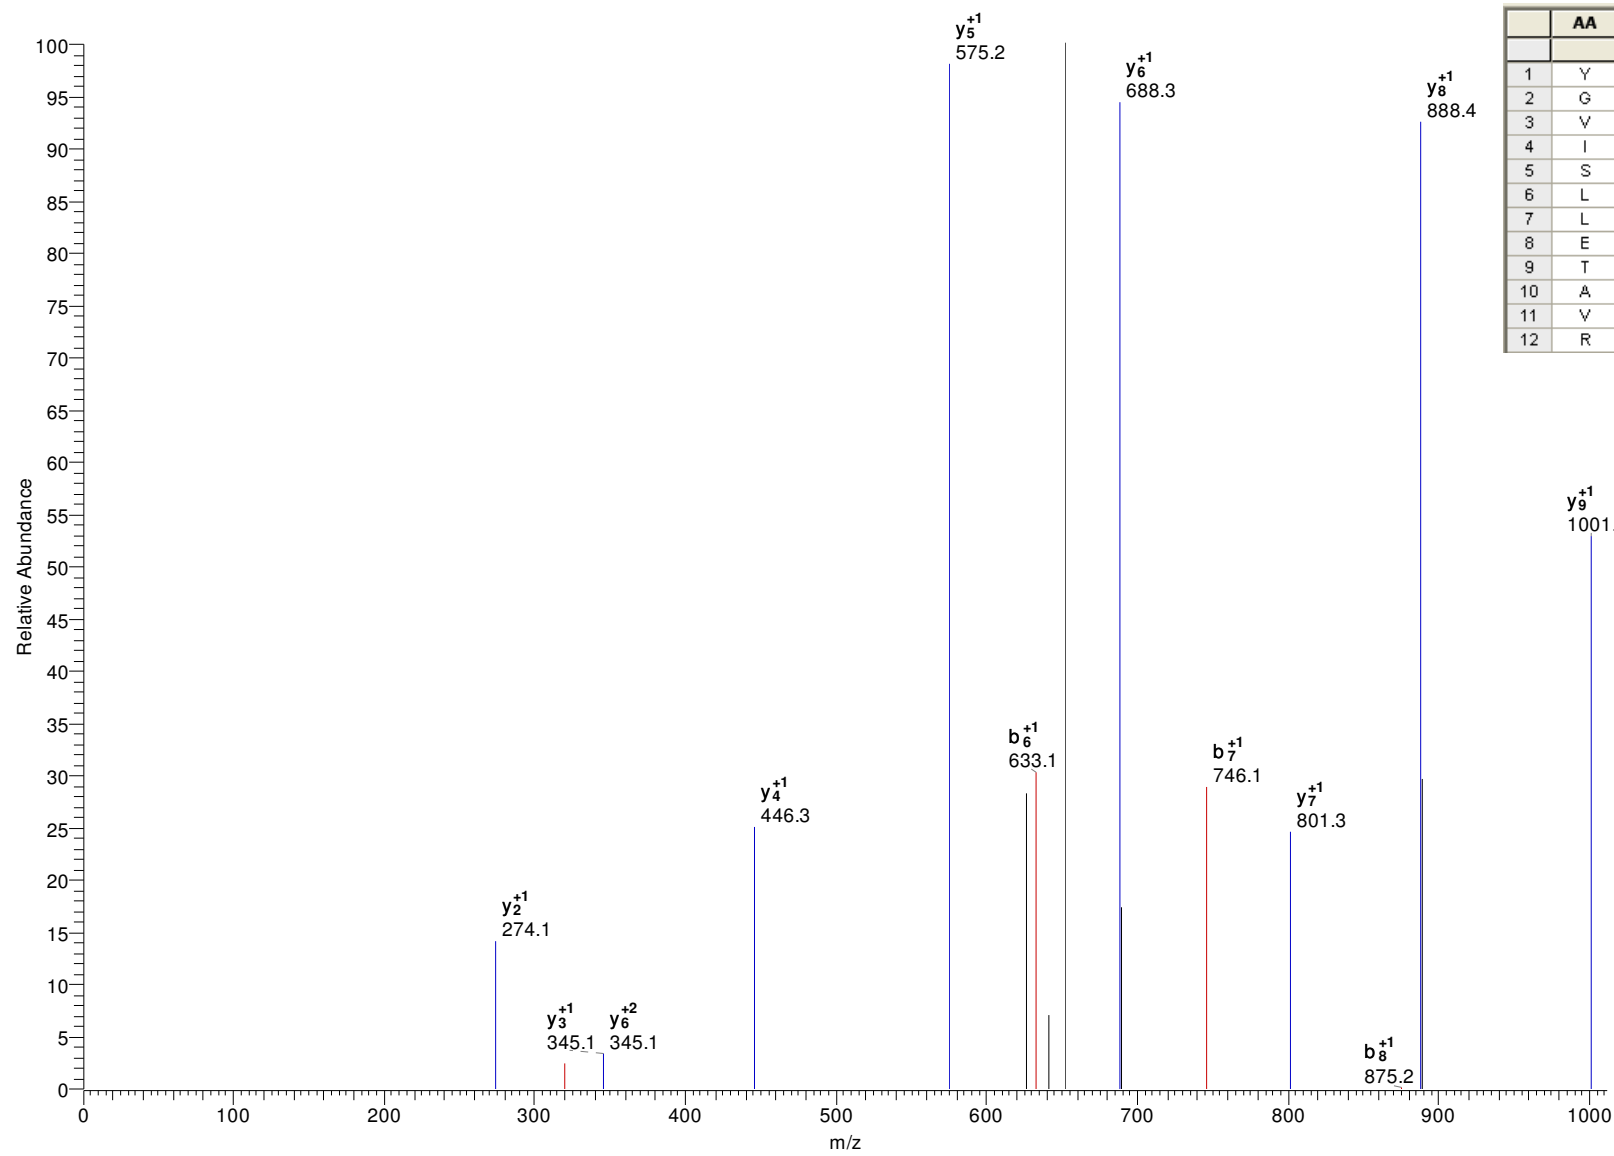

|    | AA | B       | Y       |    |
|----|----|---------|---------|----|
|    |    | ✓       | ✓       |    |
| 1  | Y  | 164.07  | -       | 12 |
| 2  | G  | 221.09  | 1157.69 | 11 |
| 3  | V  | 320.16  | 1100.67 | 10 |
| 4  | I  | 433.24  | 1001.60 | 9  |
| 5  | S  | 520.28  | 888.51  | 8  |
| 6  | L  | 633.36  | 801.48  | 7  |
| 7  | L  | 746.44  | 688.40  | 6  |
| 8  | E  | 875.49  | 575.31  | 5  |
| 9  | T  | 976.53  | 446.27  | 4  |
| 10 | A  | 1047.57 | 345.22  | 3  |
| 11 | V  | 1146.64 | 274.19  | 2  |
| 12 | R  | -       | 175.12  | 1  |

gi|70871842|gb|EAN85920.1| calpain-like cysteine peptidase, putative [Trypanosoma cruzi]

K.MEKDEATGEFK.C

M+H=1284.577637

DeltaM=1.53374

z=2

P(pep)=0.000140222

Xcorr=2.41

DCn=0.19

#2158-2158 NL: 1.10E2

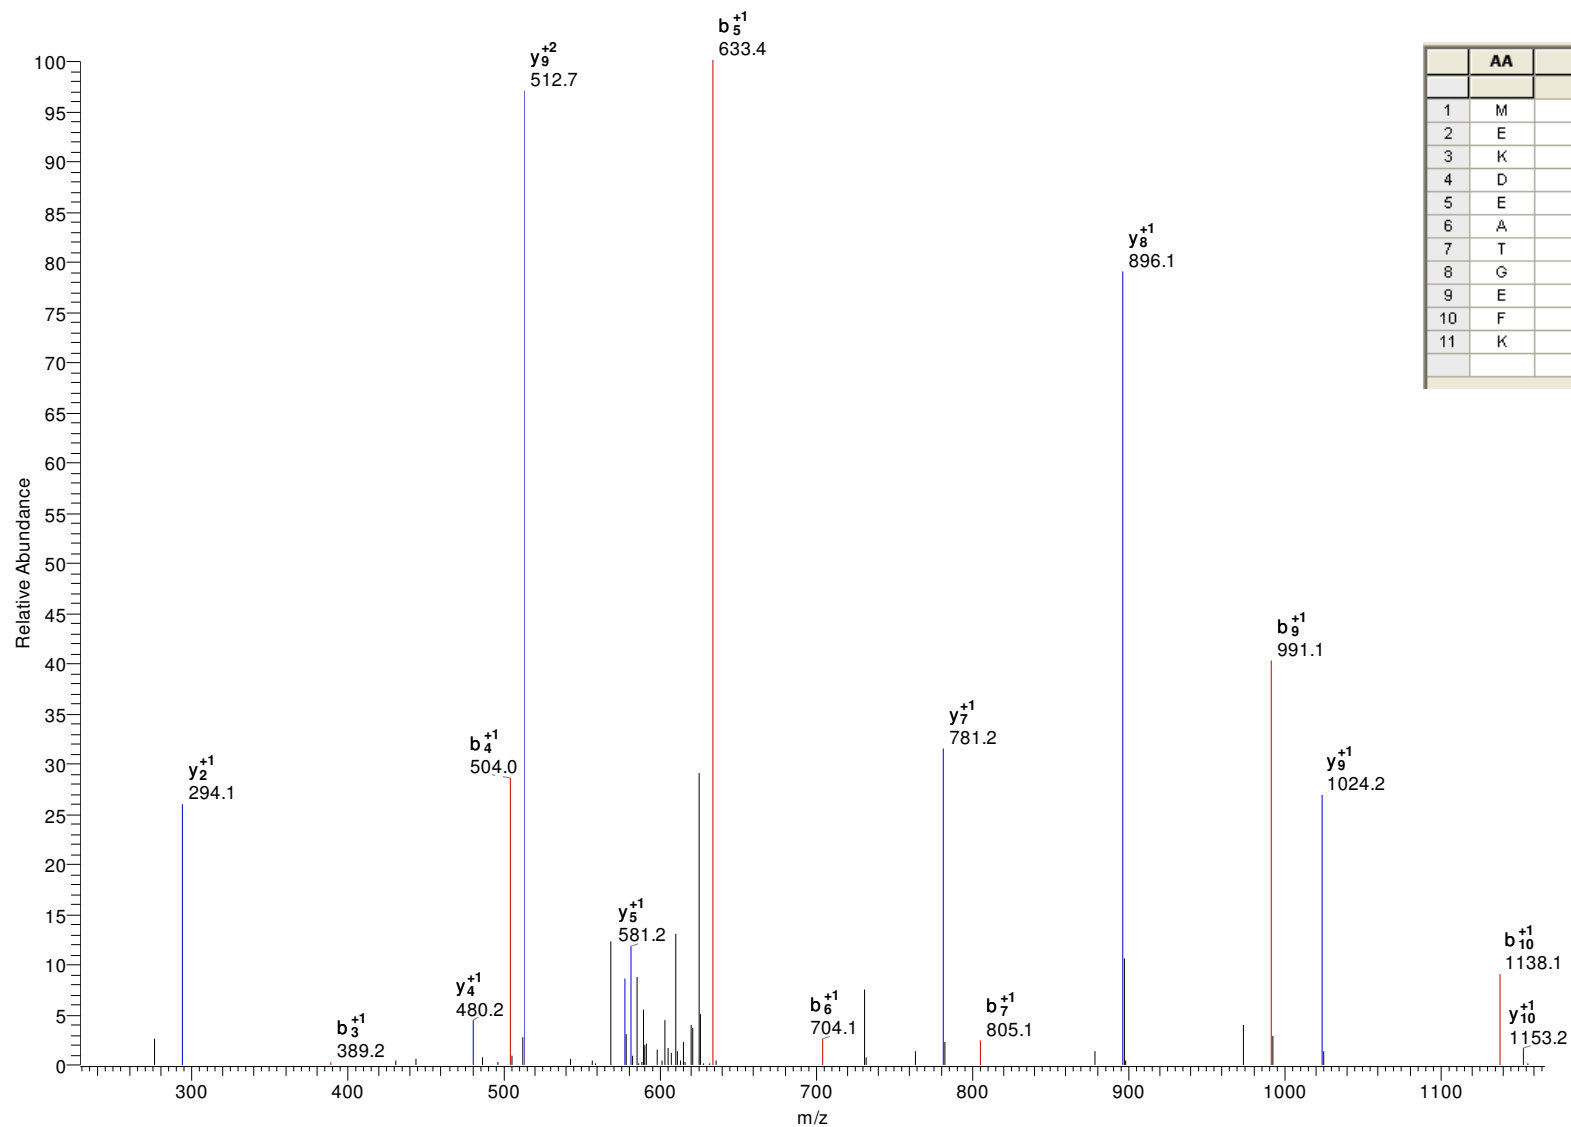

|    | AA | B       | Y       |    |
|----|----|---------|---------|----|
|    |    | ✓       | ✓       |    |
| 1  | M  | 132.05  | -       | 11 |
| 2  | E  | 261.09  | 1153.54 | 10 |
| 3  | K  | 389.19  | 1024.49 | 9  |
| 4  | D  | 504.21  | 896.40  | 8  |
| 5  | E  | 633.25  | 781.37  | 7  |
| 6  | A  | 704.29  | 652.33  | 6  |
| 7  | T  | 805.34  | 581.29  | 5  |
| 8  | G  | 862.36  | 480.25  | 4  |
| 9  | E  | 991.40  | 423.22  | 3  |
| 10 | F  | 1138.47 | 294.18  | 2  |
| 11 | K  | -       | 147.11  | 1  |

gi|70879221|gb|EAN92412.1| hypothetical protein, conserved [Trypanosoma cruzi]  
R.AGAEGHPDTLAECIGAGR.T M+H=1781.823608 DeltaM=0.73235 z=2  
P(pep)=7.39E-06 Xcorr=2.41 DCn=0.51

#2857-2857 NL: 1.37E2

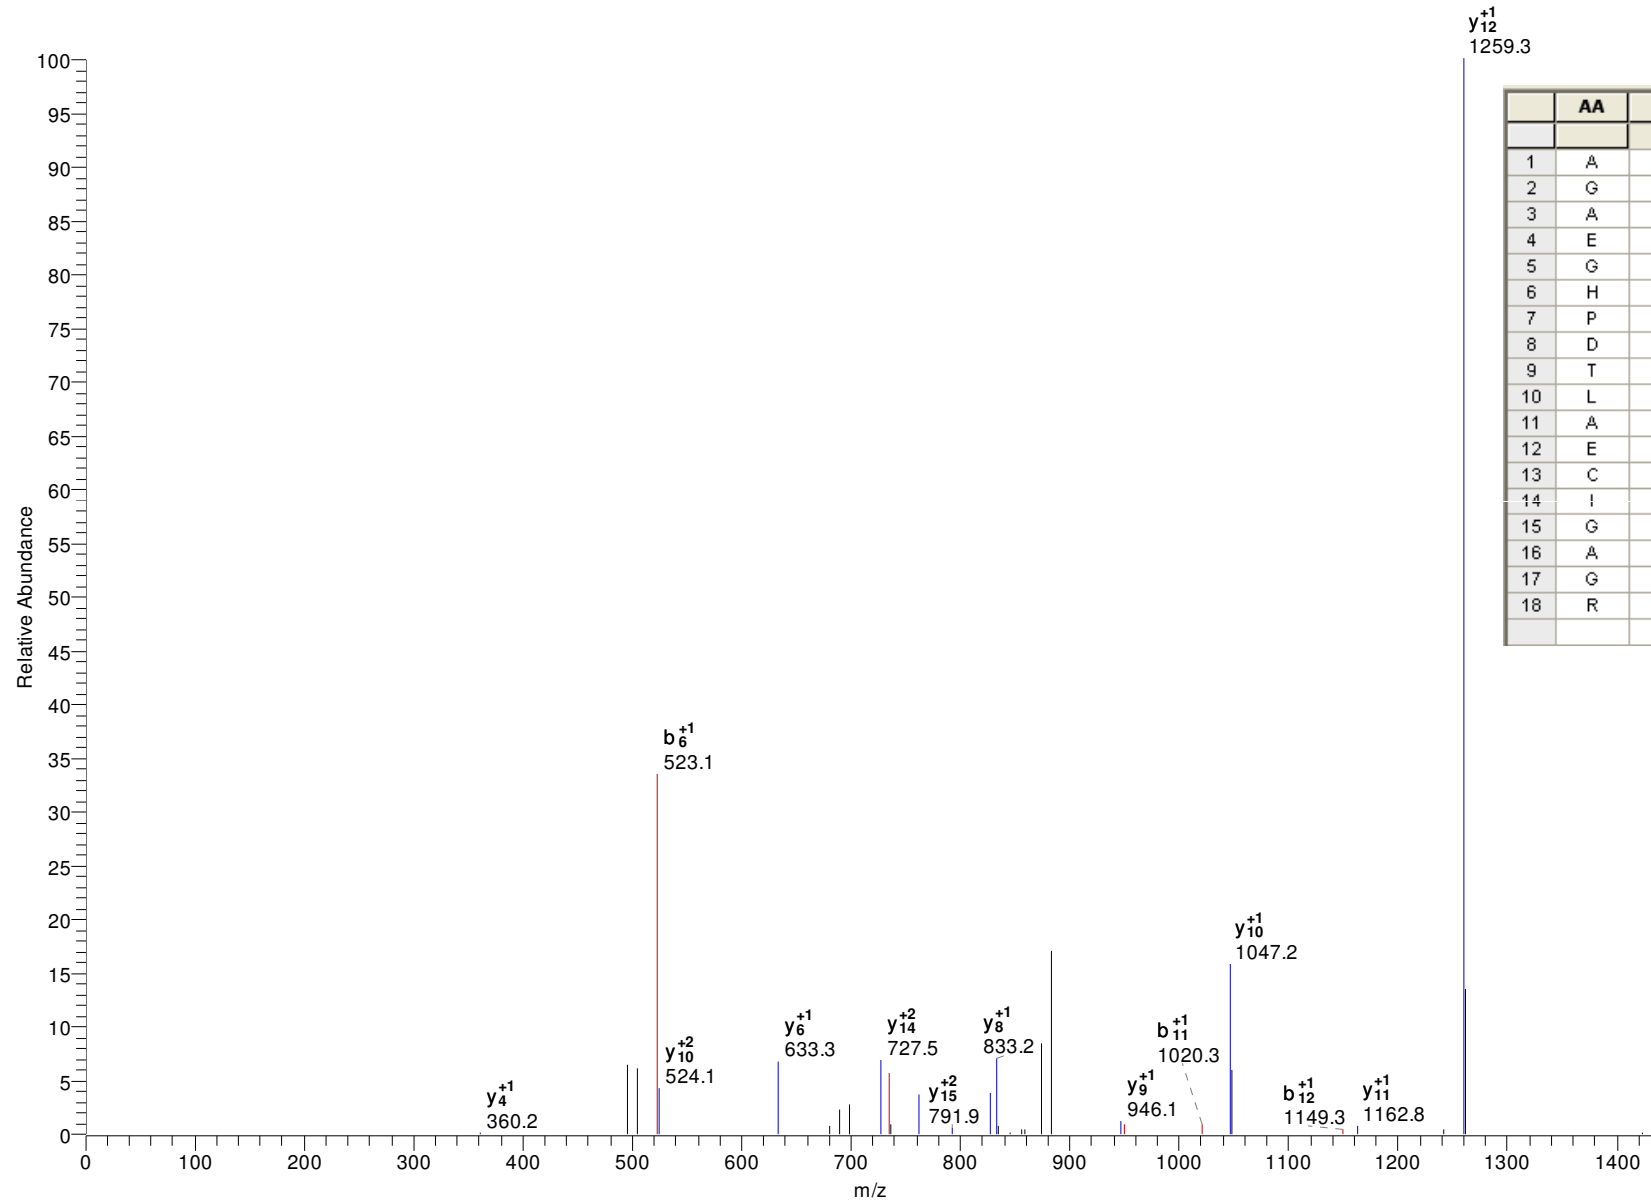

|    | AA | B                                   | Y                                   |    |
|----|----|-------------------------------------|-------------------------------------|----|
|    |    | <input checked="" type="checkbox"/> | <input checked="" type="checkbox"/> |    |
| 1  | A  | 72.04                               | -                                   | 18 |
| 2  | G  | 129.07                              | 1710.79                             | 17 |
| 3  | A  | 200.10                              | 1653.76                             | 16 |
| 4  | E  | 329.15                              | 1582.73                             | 15 |
| 5  | G  | 386.17                              | 1453.69                             | 14 |
| 6  | H  | 523.23                              | 1396.66                             | 13 |
| 7  | P  | 620.28                              | 1259.60                             | 12 |
| 8  | D  | 735.31                              | 1162.55                             | 11 |
| 9  | T  | 836.35                              | 1047.53                             | 10 |
| 10 | L  | 949.44                              | 946.48                              | 9  |
| 11 | A  | 1020.47                             | 833.39                              | 8  |
| 12 | E  | 1149.52                             | 762.36                              | 7  |
| 13 | C  | 1309.55                             | 633.31                              | 6  |
| 14 | I  | 1422.63                             | 473.28                              | 5  |
| 15 | G  | 1479.65                             | 360.20                              | 4  |
| 16 | A  | 1550.69                             | 303.18                              | 3  |
| 17 | G  | 1607.71                             | 232.14                              | 2  |
| 18 | R  | -                                   | 175.12                              | 1  |

gi|70881371|gb|EAN94405.1| cytochrome c oxidase subunit V, putative [Trypanosoma cruzi]

R.GAASLLESYR.G

M+H=1179.636841

DeltaM=1.22344

z=2

P(pep)=0.000706255

Xcorr=2.38

DCn=0.30

#5227-5227 NL: 3.69E1

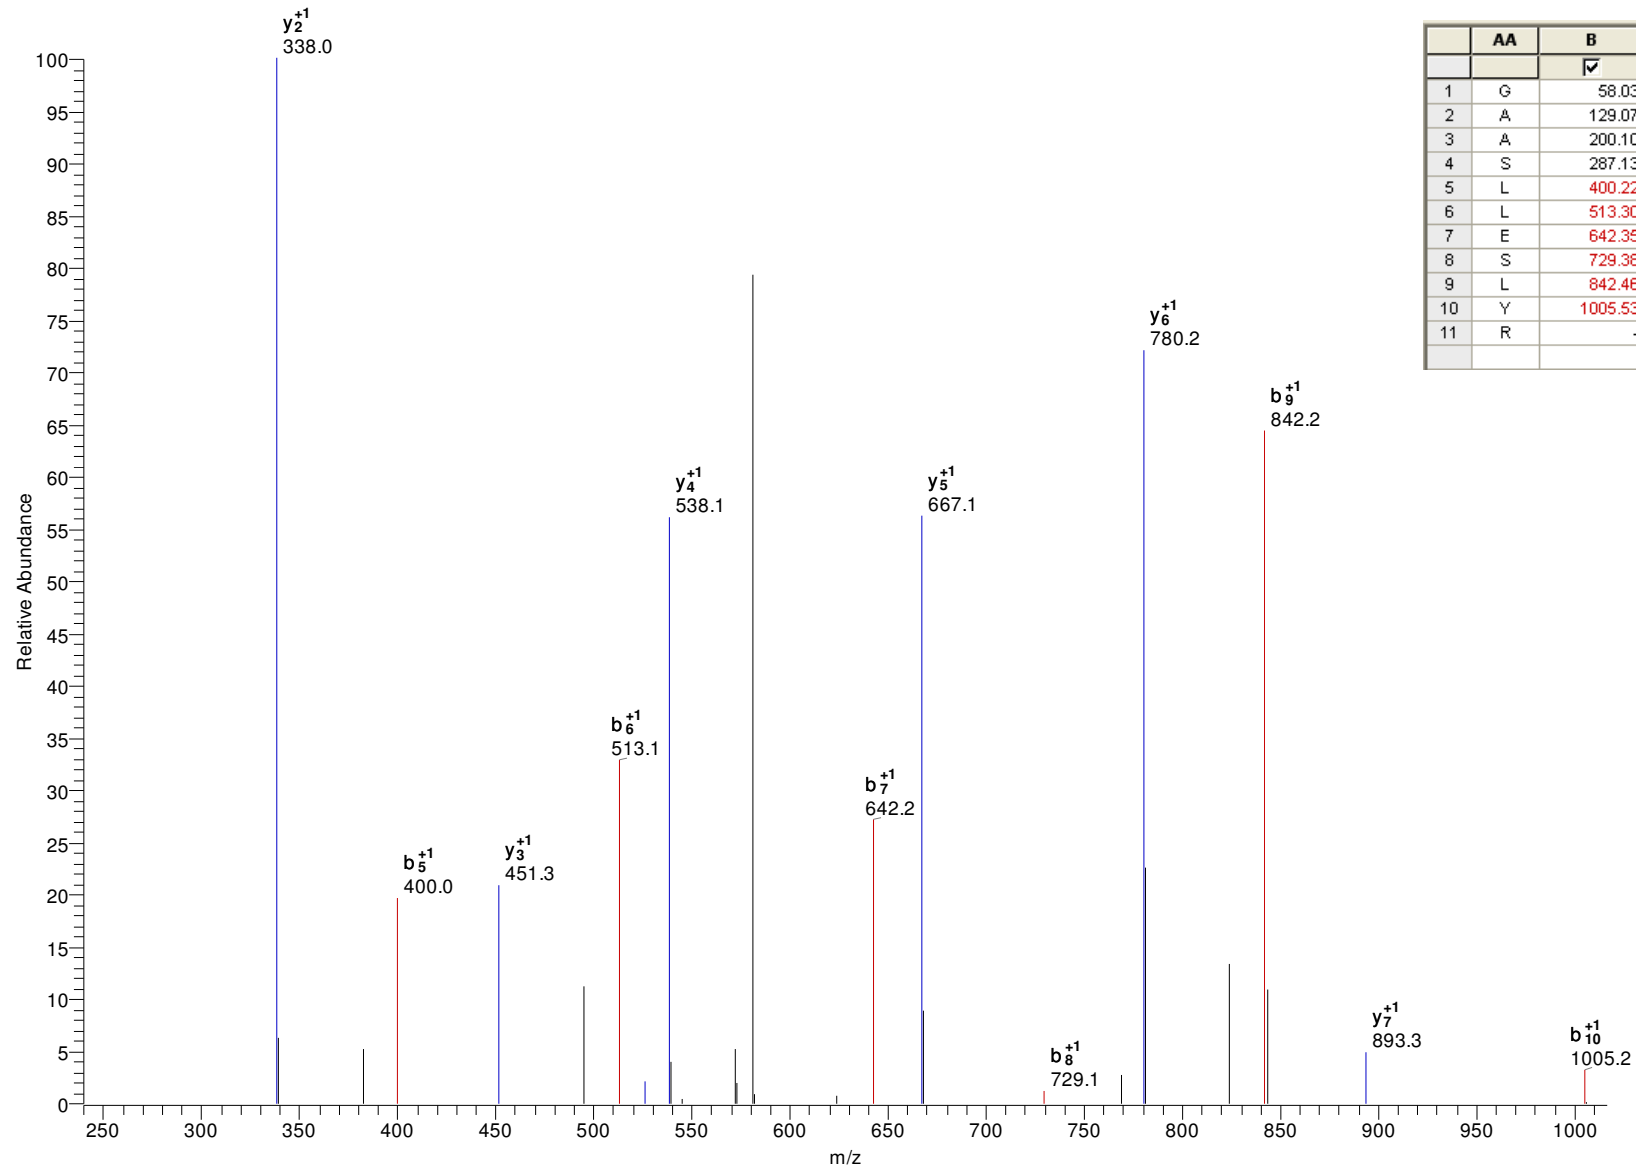

|    | AA | B                                   | Y                                   |    |
|----|----|-------------------------------------|-------------------------------------|----|
|    |    | <input checked="" type="checkbox"/> | <input checked="" type="checkbox"/> |    |
| 1  | G  | 58.03                               | -                                   | 11 |
| 2  | A  | 129.07                              | 1122.62                             | 10 |
| 3  | A  | 200.10                              | 1051.58                             | 9  |
| 4  | S  | 287.13                              | 980.54                              | 8  |
| 5  | L  | 400.22                              | 893.51                              | 7  |
| 6  | L  | 513.30                              | 780.43                              | 6  |
| 7  | E  | 642.35                              | 667.34                              | 5  |
| 8  | S  | 729.38                              | 538.30                              | 4  |
| 9  | L  | 842.46                              | 451.27                              | 3  |
| 10 | Y  | 1005.53                             | 338.18                              | 2  |
| 11 | R  | -                                   | 175.12                              | 1  |

gi|70885013|gb|EAN97849.1| enolase, putative [Trypanosoma cruzi]

-.SPEATWVTAK.-

M+H=1089.557495

DeltaM=0.53960

z=2

P(pep)=0.000930932

Xcorr=2.36

DCn=0.17

#2606-2606 NL: 1.51E2

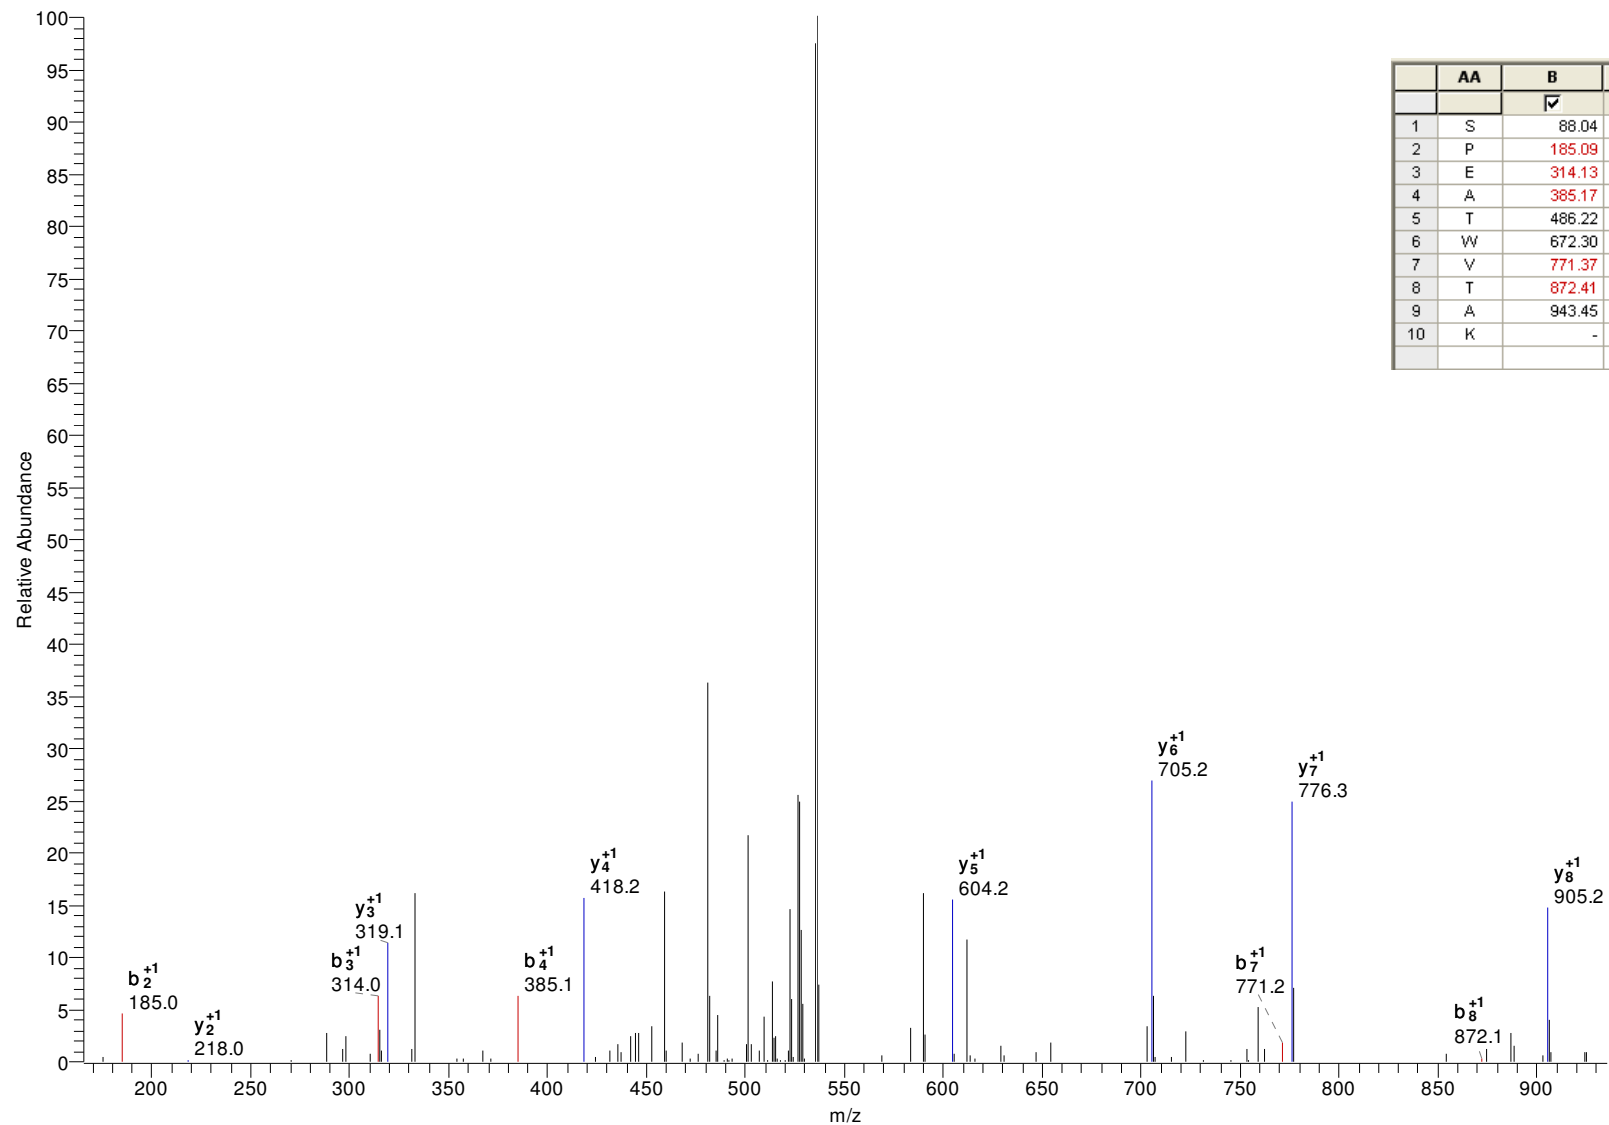

|    | AA | B      | Y       |    |
|----|----|--------|---------|----|
|    |    | ✓      | ✓       |    |
| 1  | S  | 88.04  | -       | 10 |
| 2  | P  | 185.09 | 1002.53 | 9  |
| 3  | E  | 314.13 | 905.47  | 8  |
| 4  | A  | 385.17 | 776.43  | 7  |
| 5  | T  | 486.22 | 705.39  | 6  |
| 6  | W  | 672.30 | 604.35  | 5  |
| 7  | V  | 771.37 | 418.27  | 4  |
| 8  | T  | 872.41 | 319.20  | 3  |
| 9  | A  | 943.45 | 218.15  | 2  |
| 10 | K  | -      | 147.11  | 1  |

gi|70883884|gb|EAN96772.1| hexose transporter, putative [Trypanosoma cruzi]

K.WVYSDEECK.N

M+H=1215.498657

DeltaM=1.23491

z=2

P(pep)=1.01E-06

Xcorr=2.33

DCn=0.46

#2766-2766 NL: 2.40E2

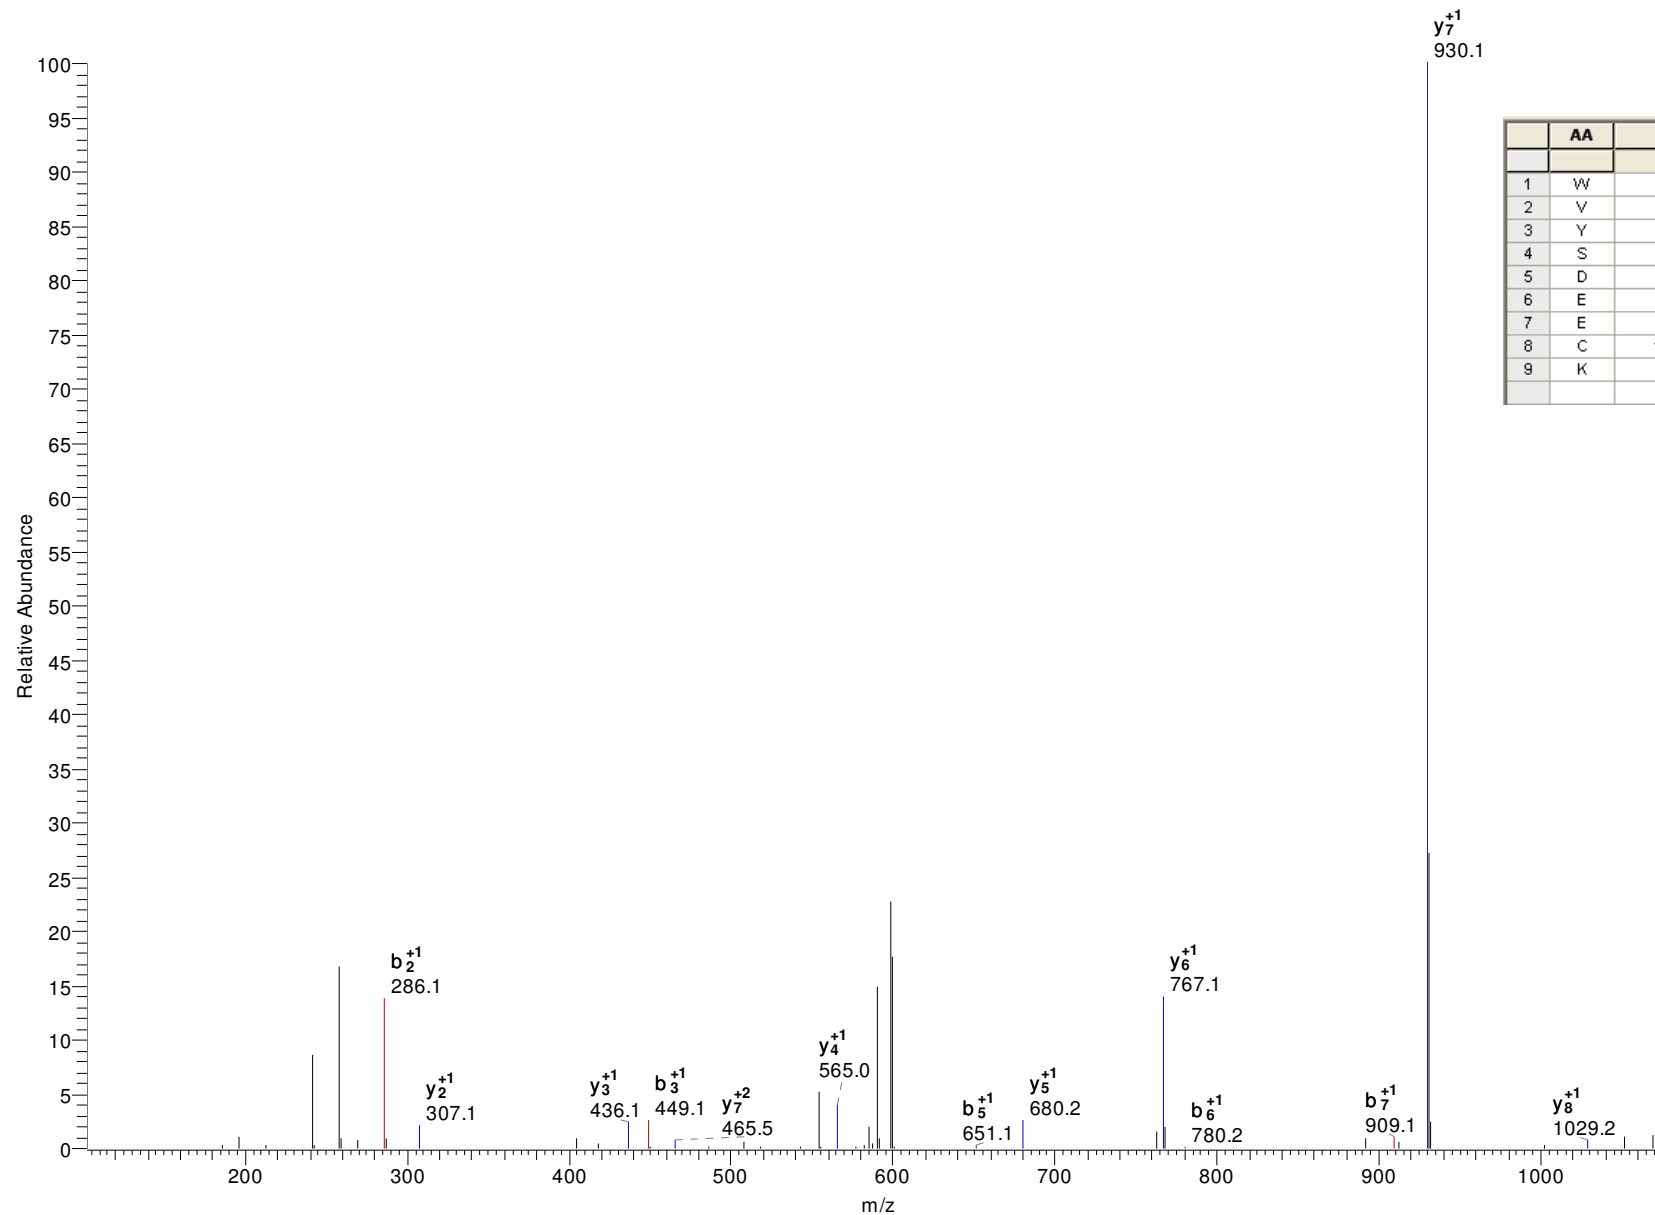

|   | AA | B                                   | Y                                   |   |
|---|----|-------------------------------------|-------------------------------------|---|
|   |    | <input checked="" type="checkbox"/> | <input checked="" type="checkbox"/> |   |
| 1 | W  | 187.09                              | -                                   | 9 |
| 2 | V  | 286.16                              | 1029.42                             | 8 |
| 3 | Y  | 449.22                              | 930.35                              | 7 |
| 4 | S  | 536.25                              | 767.29                              | 6 |
| 5 | D  | 651.28                              | 680.26                              | 5 |
| 6 | E  | 780.32                              | 565.23                              | 4 |
| 7 | E  | 909.36                              | 436.19                              | 3 |
| 8 | C  | 1069.39                             | 307.14                              | 2 |
| 9 | K  | -                                   | 147.11                              | 1 |

gi|70883843|gb|EAN96732.1| succinyl-CoA ligase [GDP-forming] beta-chain, putative [Trypanosoma cruzi]

R.TLEEVEAALGK.I

M+H=1159.620483

DeltaM=1.81072

z=2

P(pep)=5.84E-05

Xcorr=2.32

DCn=0.45

#3871-3871 NL: 6.60E1

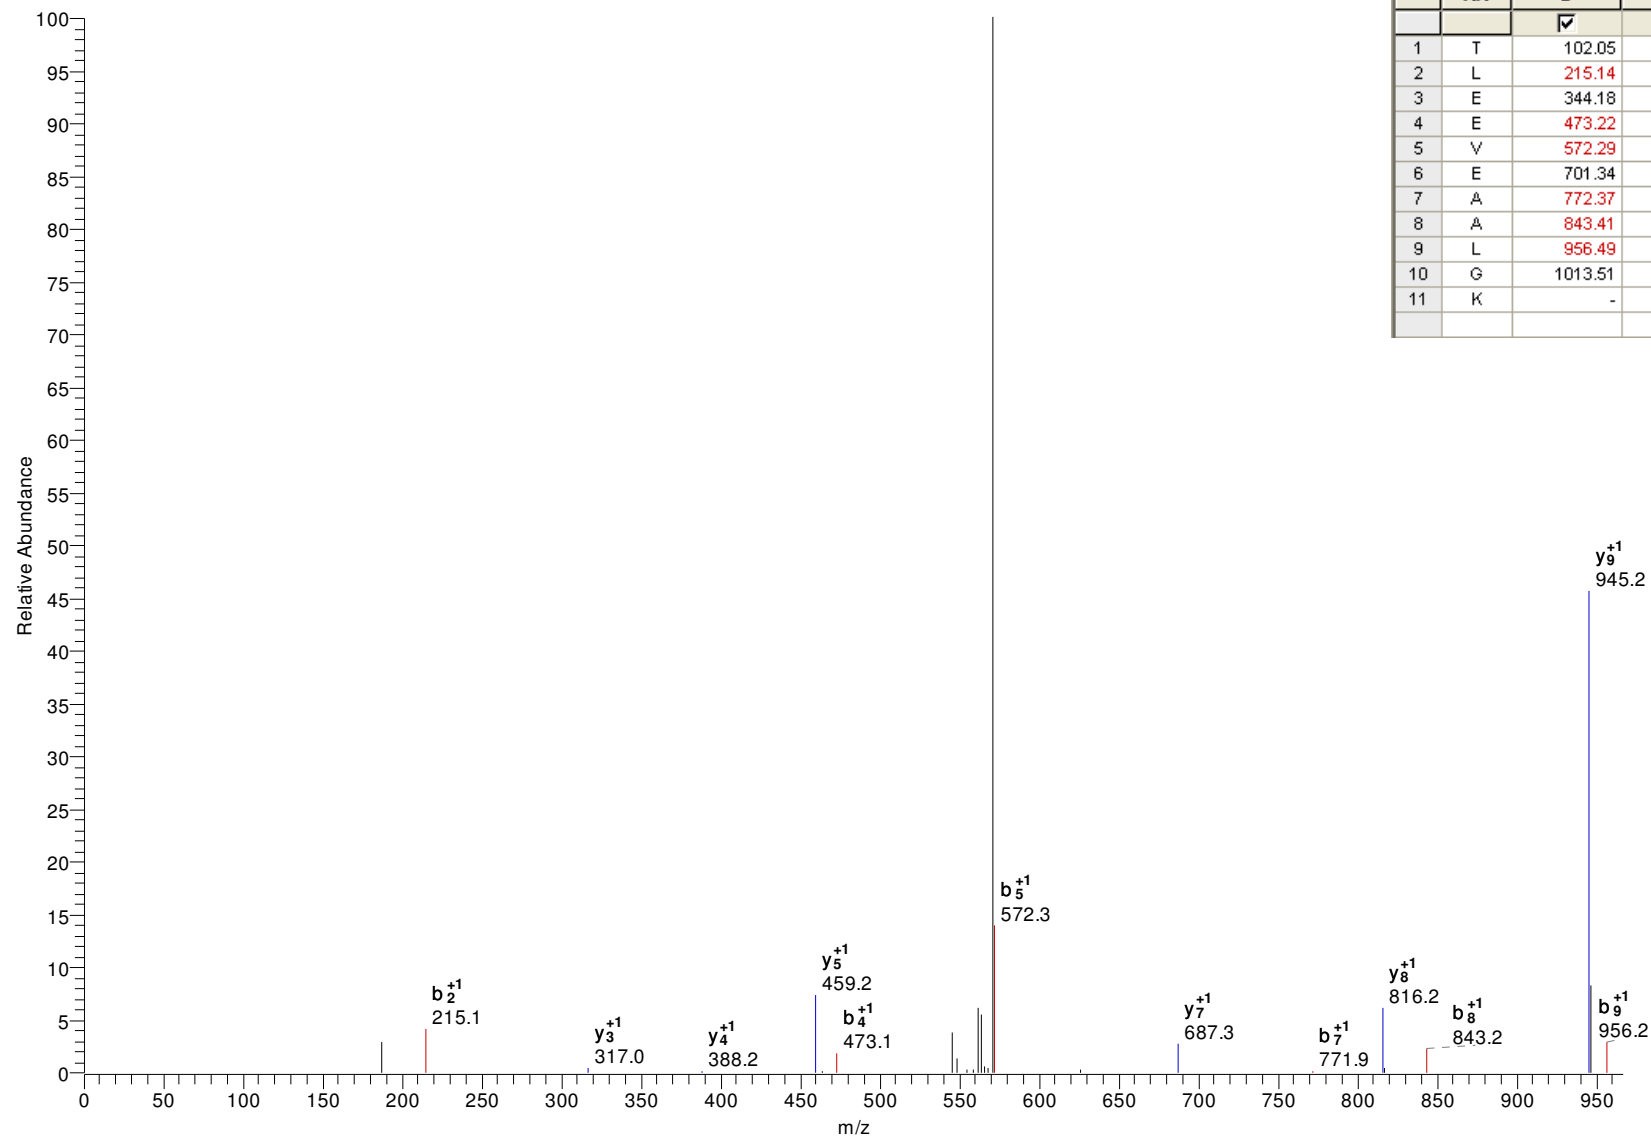

|    | AA | B                                   | Y                                   |    |
|----|----|-------------------------------------|-------------------------------------|----|
|    |    | <input checked="" type="checkbox"/> | <input checked="" type="checkbox"/> |    |
| 1  | T  | 102.05                              | -                                   | 11 |
| 2  | L  | 215.14                              | 1058.57                             | 10 |
| 3  | E  | 344.18                              | 945.49                              | 9  |
| 4  | E  | 473.22                              | 816.45                              | 8  |
| 5  | V  | 572.29                              | 687.40                              | 7  |
| 6  | E  | 701.34                              | 588.34                              | 6  |
| 7  | A  | 772.37                              | 459.29                              | 5  |
| 8  | A  | 843.41                              | 388.26                              | 4  |
| 9  | L  | 956.49                              | 317.22                              | 3  |
| 10 | G  | 1013.51                             | 204.13                              | 2  |
| 11 | K  | -                                   | 147.11                              | 1  |

gi|70874225|gb|EAN87939.1| hypothetical protein, conserved [Trypanosoma cruzi]

K.DYDSAVIDCER.A

M+H=1342.557983

DeltaM=1.35124

z=2

P(pep)=4.50E-05

Xcorr=2.32E

DCn=0.36

#2663-2663 NL: 5.69E1

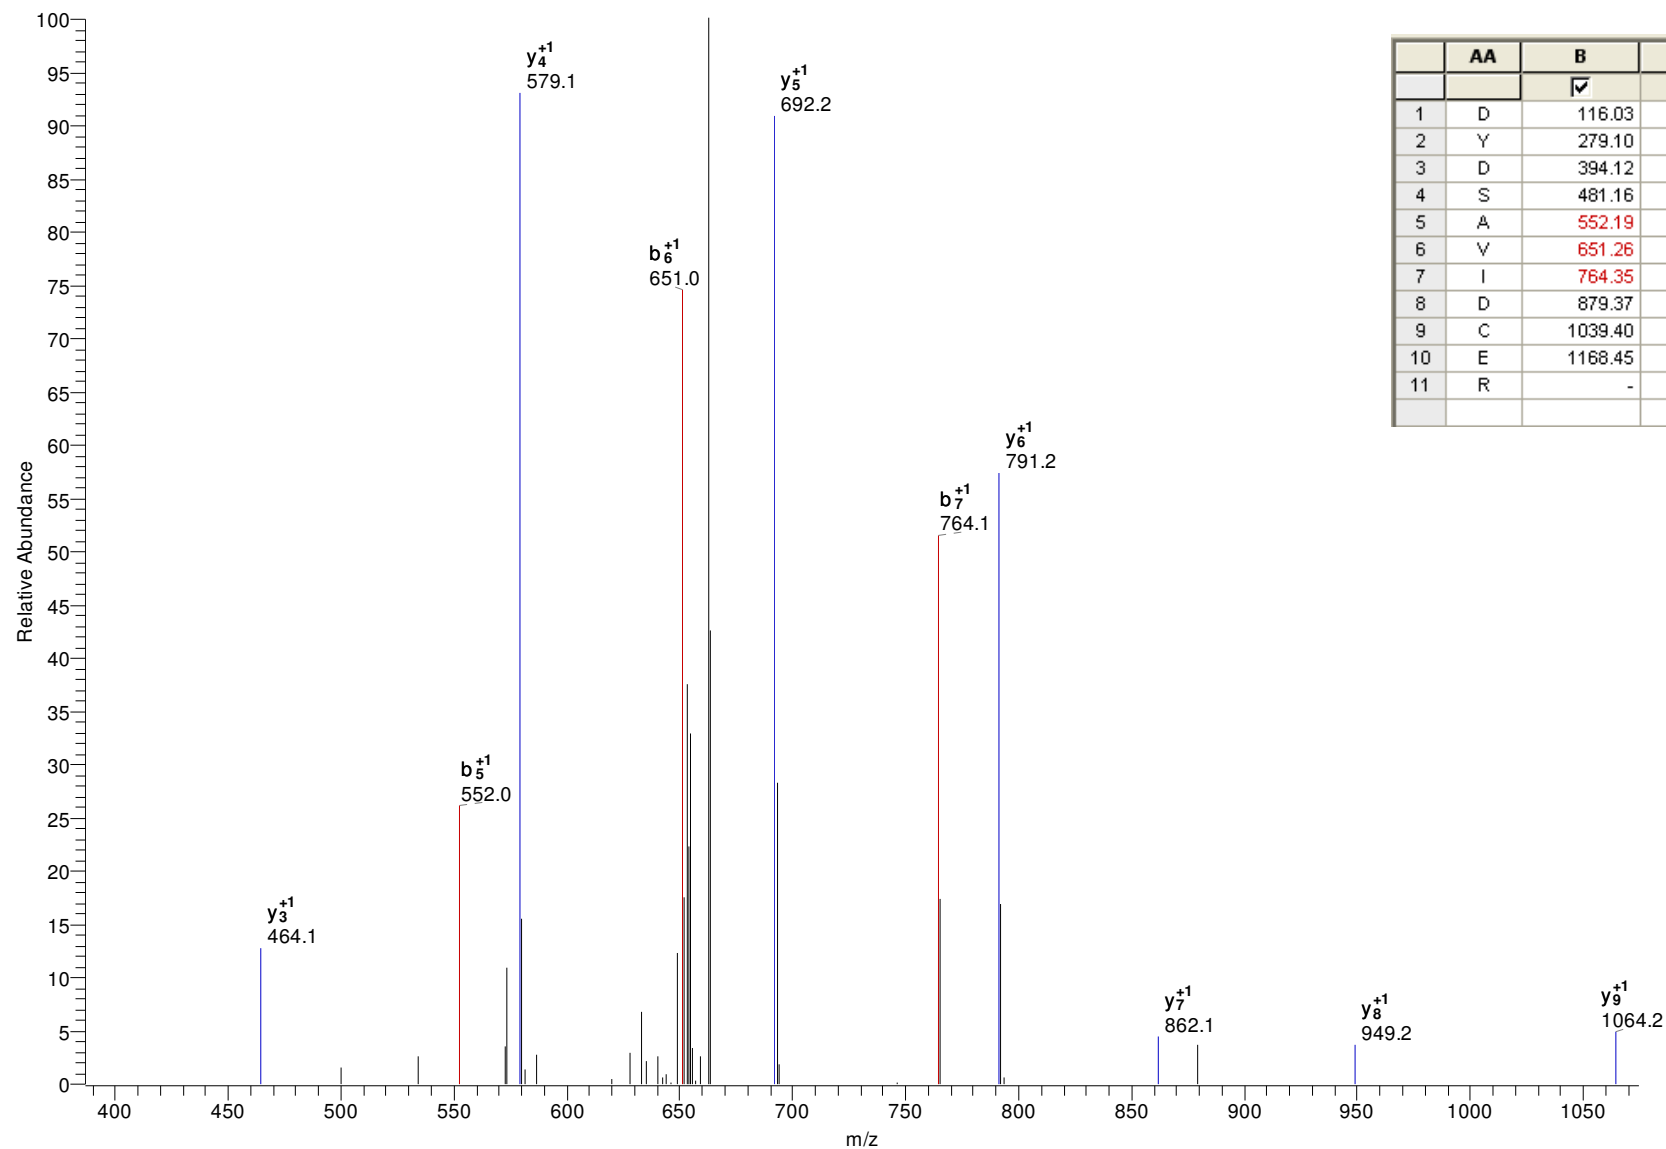

|    | AA | B       | Y       |    |
|----|----|---------|---------|----|
| 1  | D  | 116.03  | -       | 11 |
| 2  | Y  | 279.10  | 1227.53 | 10 |
| 3  | D  | 394.12  | 1064.47 | 9  |
| 4  | S  | 481.16  | 949.44  | 8  |
| 5  | A  | 552.19  | 862.41  | 7  |
| 6  | V  | 651.26  | 791.37  | 6  |
| 7  | I  | 764.35  | 692.30  | 5  |
| 8  | D  | 879.37  | 579.22  | 4  |
| 9  | C  | 1039.40 | 464.19  | 3  |
| 10 | E  | 1168.45 | 304.16  | 2  |
| 11 | R  | -       | 175.12  | 1  |



gi|70877838|gb|EAN91145.1| hypothetical protein, conserved [Trypanosoma cruzi]

R.YVAENWLPPAGTGPTQSQR.E

M+H=2072.019531

DeltaM=1.77519

z=2

P(pep)=5.88E-06

Xcorr=2.31

DCn=0.22

#3938-3938 NL:7.73E2

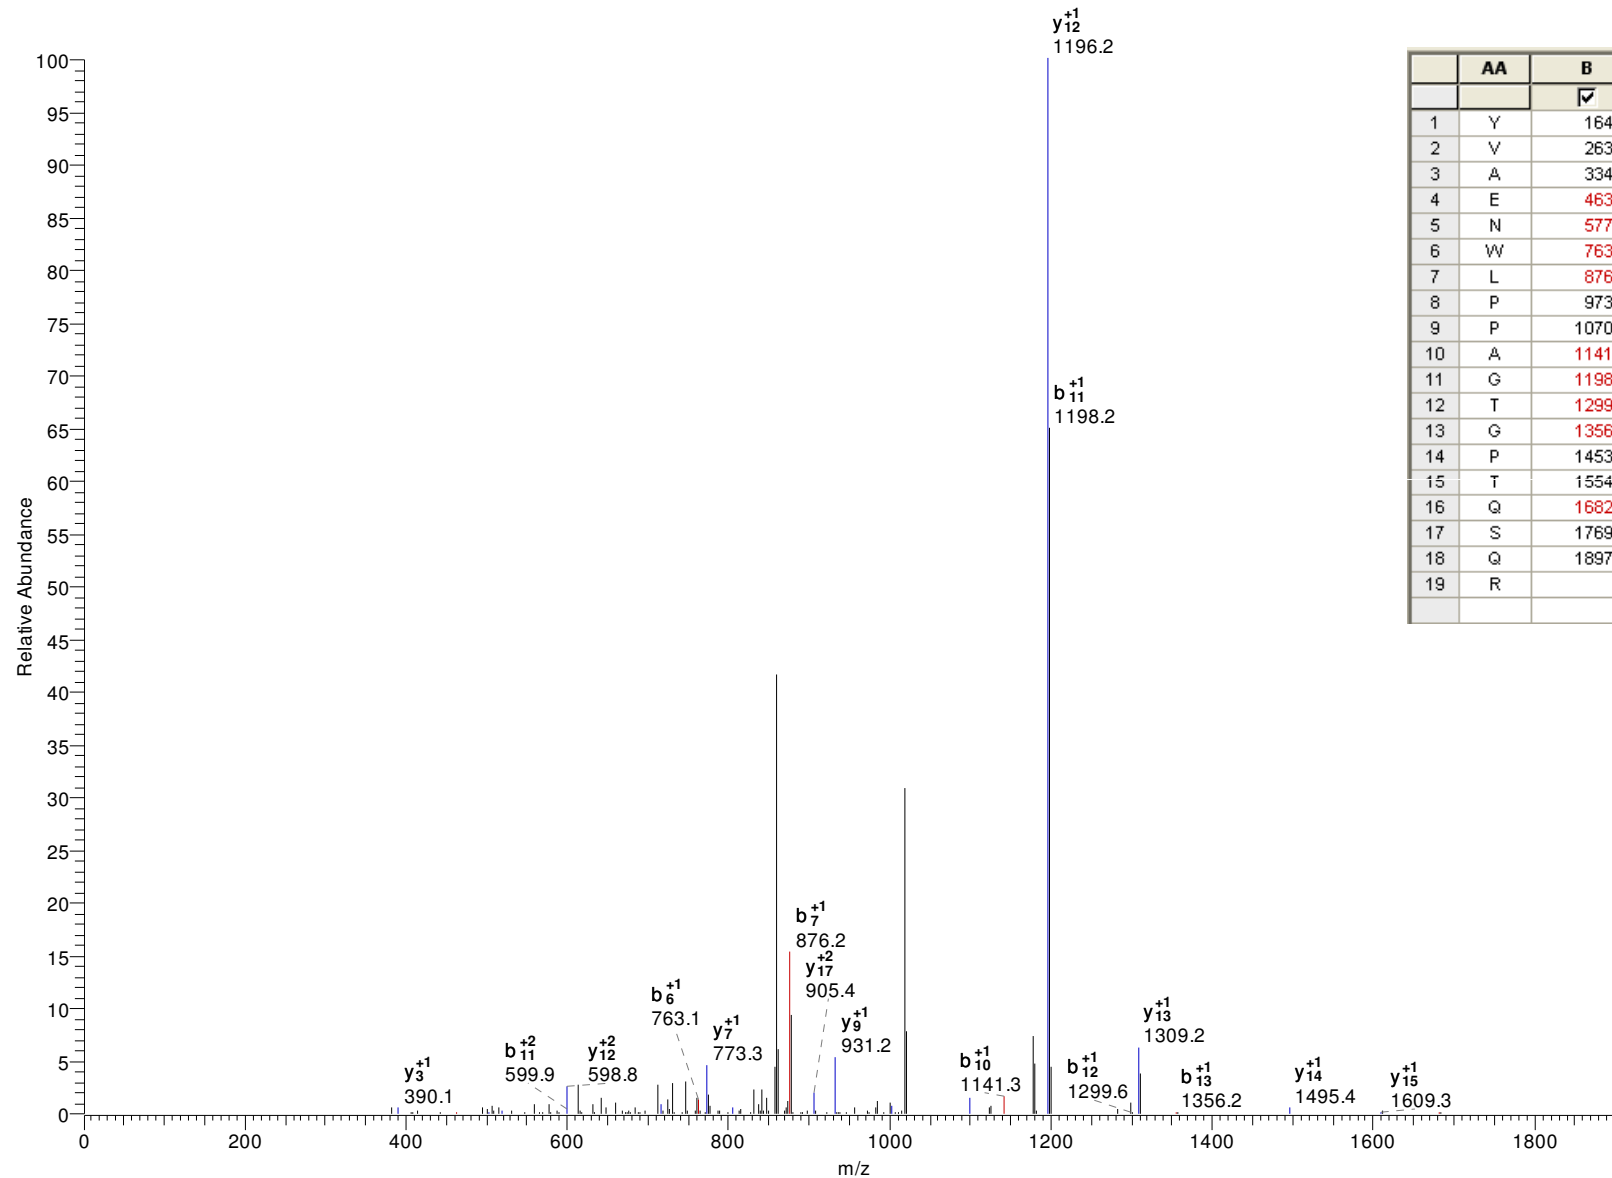

|    | AA | B                                   | Y                                   |    |
|----|----|-------------------------------------|-------------------------------------|----|
|    |    | <input checked="" type="checkbox"/> | <input checked="" type="checkbox"/> |    |
| 1  | Y  | 164.07                              | -                                   | 19 |
| 2  | V  | 263.14                              | 1908.96                             | 18 |
| 3  | A  | 334.18                              | 1809.89                             | 17 |
| 4  | E  | 463.22                              | 1738.85                             | 16 |
| 5  | N  | 577.26                              | 1609.81                             | 15 |
| 6  | W  | 763.34                              | 1495.77                             | 14 |
| 7  | L  | 876.43                              | 1309.69                             | 13 |
| 8  | P  | 973.48                              | 1196.60                             | 12 |
| 9  | P  | 1070.53                             | 1099.55                             | 11 |
| 10 | A  | 1141.57                             | 1002.50                             | 10 |
| 11 | G  | 1198.59                             | 931.46                              | 9  |
| 12 | T  | 1299.64                             | 874.44                              | 8  |
| 13 | G  | 1356.66                             | 773.39                              | 7  |
| 14 | P  | 1453.71                             | 716.37                              | 6  |
| 15 | T  | 1554.76                             | 619.32                              | 5  |
| 16 | Q  | 1682.82                             | 518.27                              | 4  |
| 17 | S  | 1769.85                             | 390.21                              | 3  |
| 18 | Q  | 1897.91                             | 303.18                              | 2  |
| 19 | R  | -                                   | 175.12                              | 1  |

gi|70880838|gb|EAN93909.1| hypothetical protein, conserved [Trypanosoma cruzi]  
R.ASCDYIFK.N M+H=1003.455383 DeltaM=-0.08851 z=2  
P(pep)=2.47E-05 Xcorr=2.30 DCn=0.32

#3192-3192 NL: 2.44E2

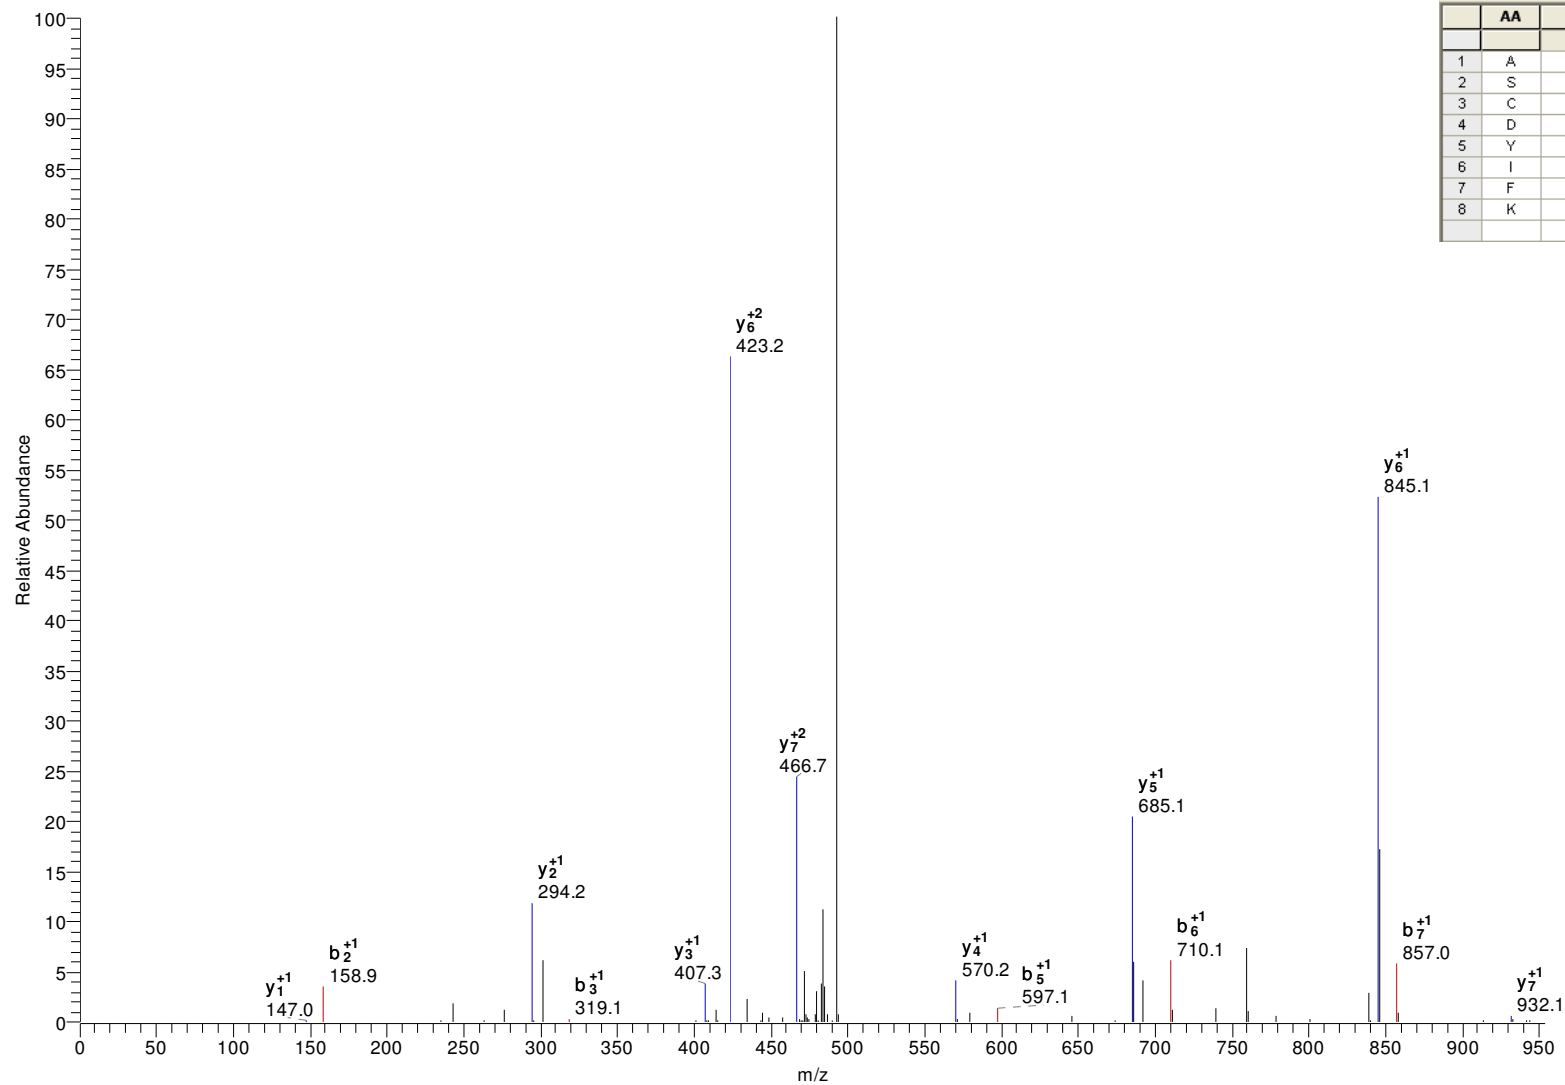

|   | AA | B      | Y      |   |
|---|----|--------|--------|---|
|   |    | ☑      | ☑      |   |
| 1 | A  | 72.04  | -      | 8 |
| 2 | S  | 159.08 | 932.42 | 7 |
| 3 | C  | 319.11 | 845.39 | 6 |
| 4 | D  | 434.13 | 685.36 | 5 |
| 5 | Y  | 597.20 | 570.33 | 4 |
| 6 | I  | 710.28 | 407.27 | 3 |
| 7 | F  | 857.35 | 294.18 | 2 |
| 8 | K  | -      | 147.11 | 1 |

gi|3063546|gb|AAC14082.1| TcC31.26 [Trypanosoma cruzi]

R.TFQEGIWAK.Y

M+H=1079.552002

DeltaM=1.58794

z=2

P(pep)=5.63E-05

Xcorr=2.28

DCn=0.44

#3380-3380 NL: 3.14E2

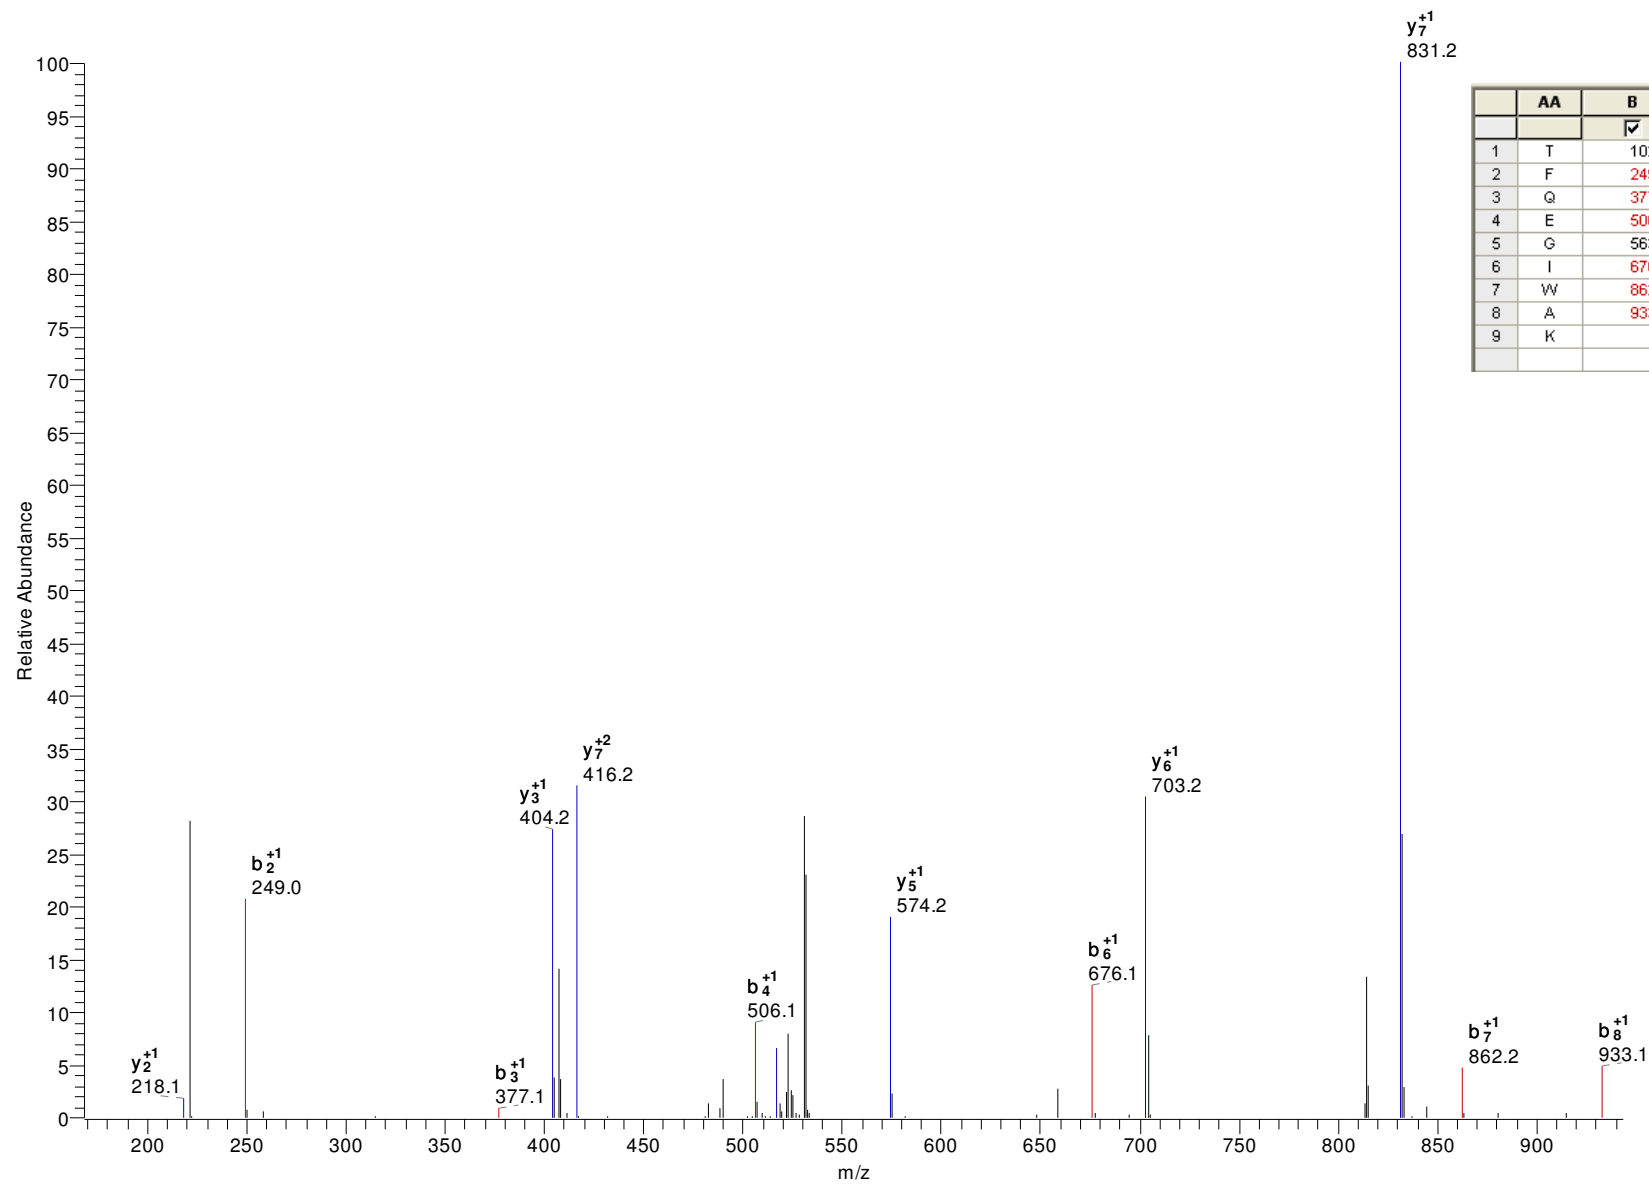

|   | AA | B      | Y      |   |
|---|----|--------|--------|---|
|   |    | ✓      | ✓      |   |
| 1 | T  | 102.05 | -      | 9 |
| 2 | F  | 249.12 | 978.50 | 8 |
| 3 | Q  | 377.18 | 831.44 | 7 |
| 4 | E  | 506.22 | 703.38 | 6 |
| 5 | G  | 563.25 | 574.33 | 5 |
| 6 | I  | 676.33 | 517.31 | 4 |
| 7 | W  | 862.41 | 404.23 | 3 |
| 8 | A  | 933.45 | 218.15 | 2 |
| 9 | K  | -      | 147.11 | 1 |

gi|70883351|gb|EAN96267.1| hypothetical protein, conserved [Trypanosoma cruzi]

K.INEAYAGFFSR.E

M+H=1274.616455

DeltaM=1.00640

z=2

P(pep)=8.40E-06

Xcorr=2.26

DCn=0.35

#4088-4088 NL: 6.05E1

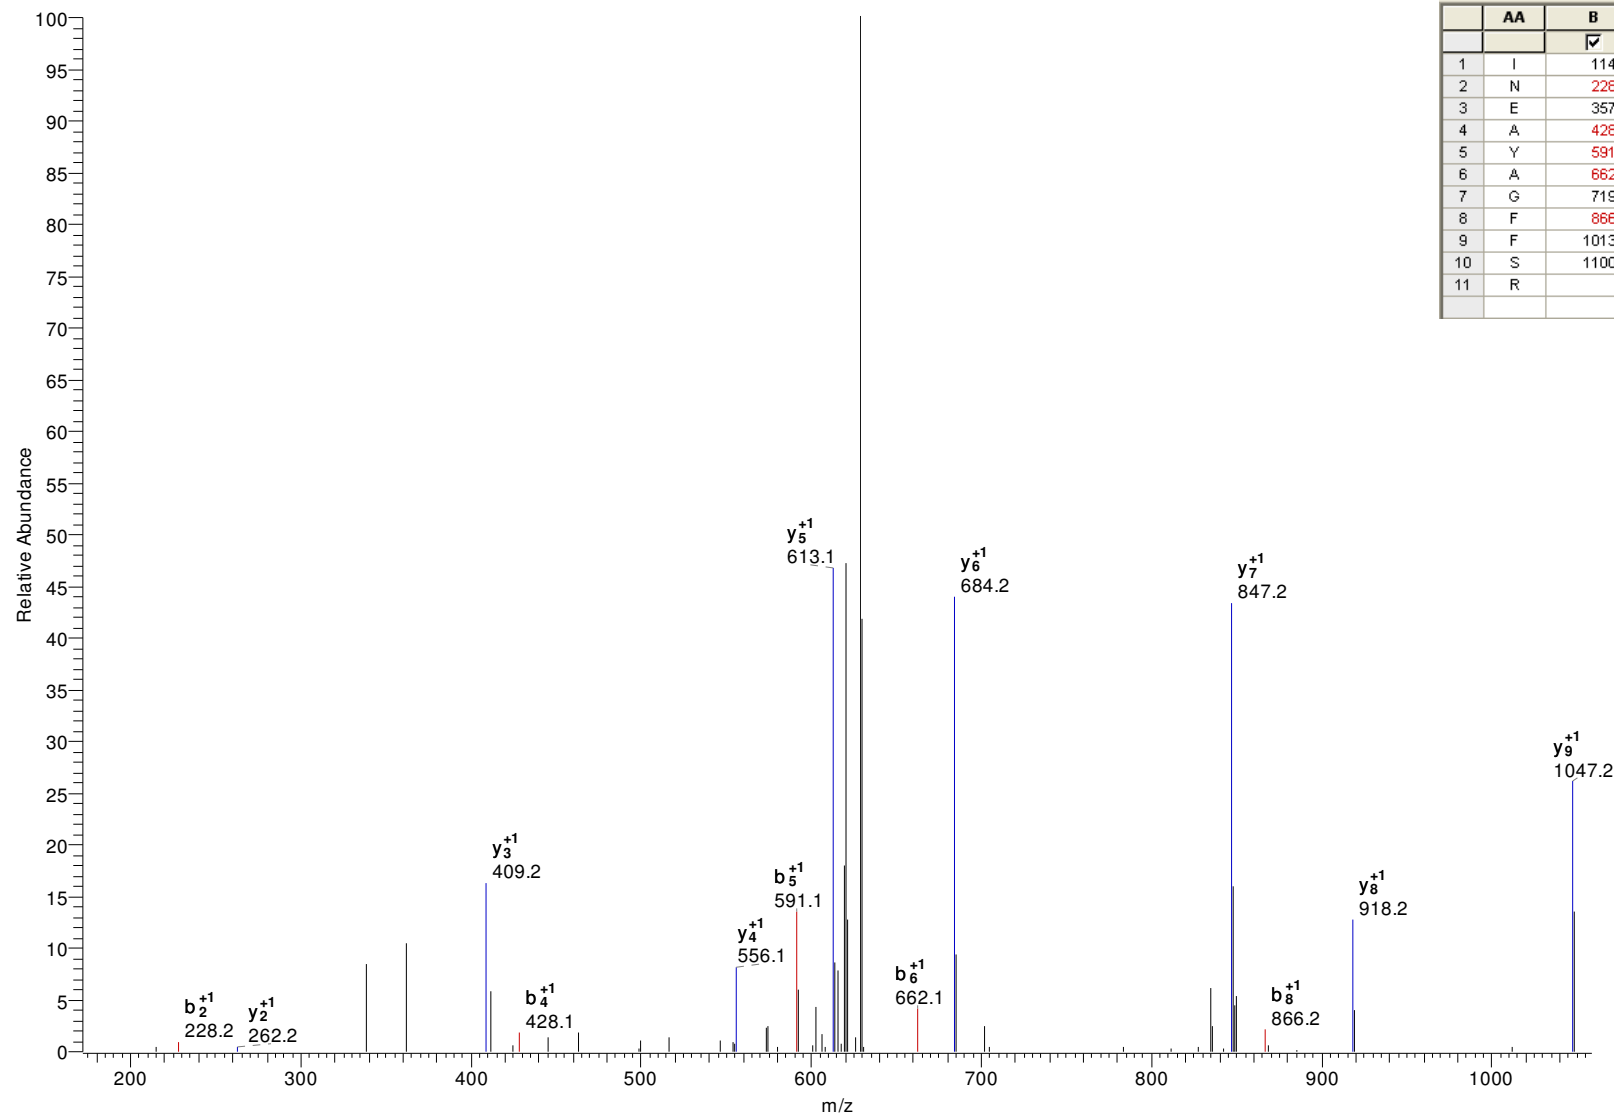

|    | AA | B                                   | Y                                   |    |
|----|----|-------------------------------------|-------------------------------------|----|
|    |    | <input checked="" type="checkbox"/> | <input checked="" type="checkbox"/> |    |
| 1  | I  | 114.09                              | -                                   | 11 |
| 2  | N  | 228.13                              | 1161.53                             | 10 |
| 3  | E  | 357.18                              | 1047.49                             | 9  |
| 4  | A  | 428.21                              | 918.45                              | 8  |
| 5  | Y  | 591.28                              | 847.41                              | 7  |
| 6  | A  | 662.31                              | 684.35                              | 6  |
| 7  | G  | 719.34                              | 613.31                              | 5  |
| 8  | F  | 866.40                              | 556.29                              | 4  |
| 9  | F  | 1013.47                             | 409.22                              | 3  |
| 10 | S  | 1100.50                             | 262.15                              | 2  |
| 11 | R  | -                                   | 175.12                              | 1  |

gi|70887519|gb|EAO00275.1| hypothetical protein, conserved [Trypanosoma cruzi]

K.DWVFTDSQSCFLDR.D

M+H=1775.769409

DeltaM=0.20036

z=2

P(pep)=2.80E-06

Xcorr=2.25

DCn=0.34

#4892-4892 NL: 1.67E1

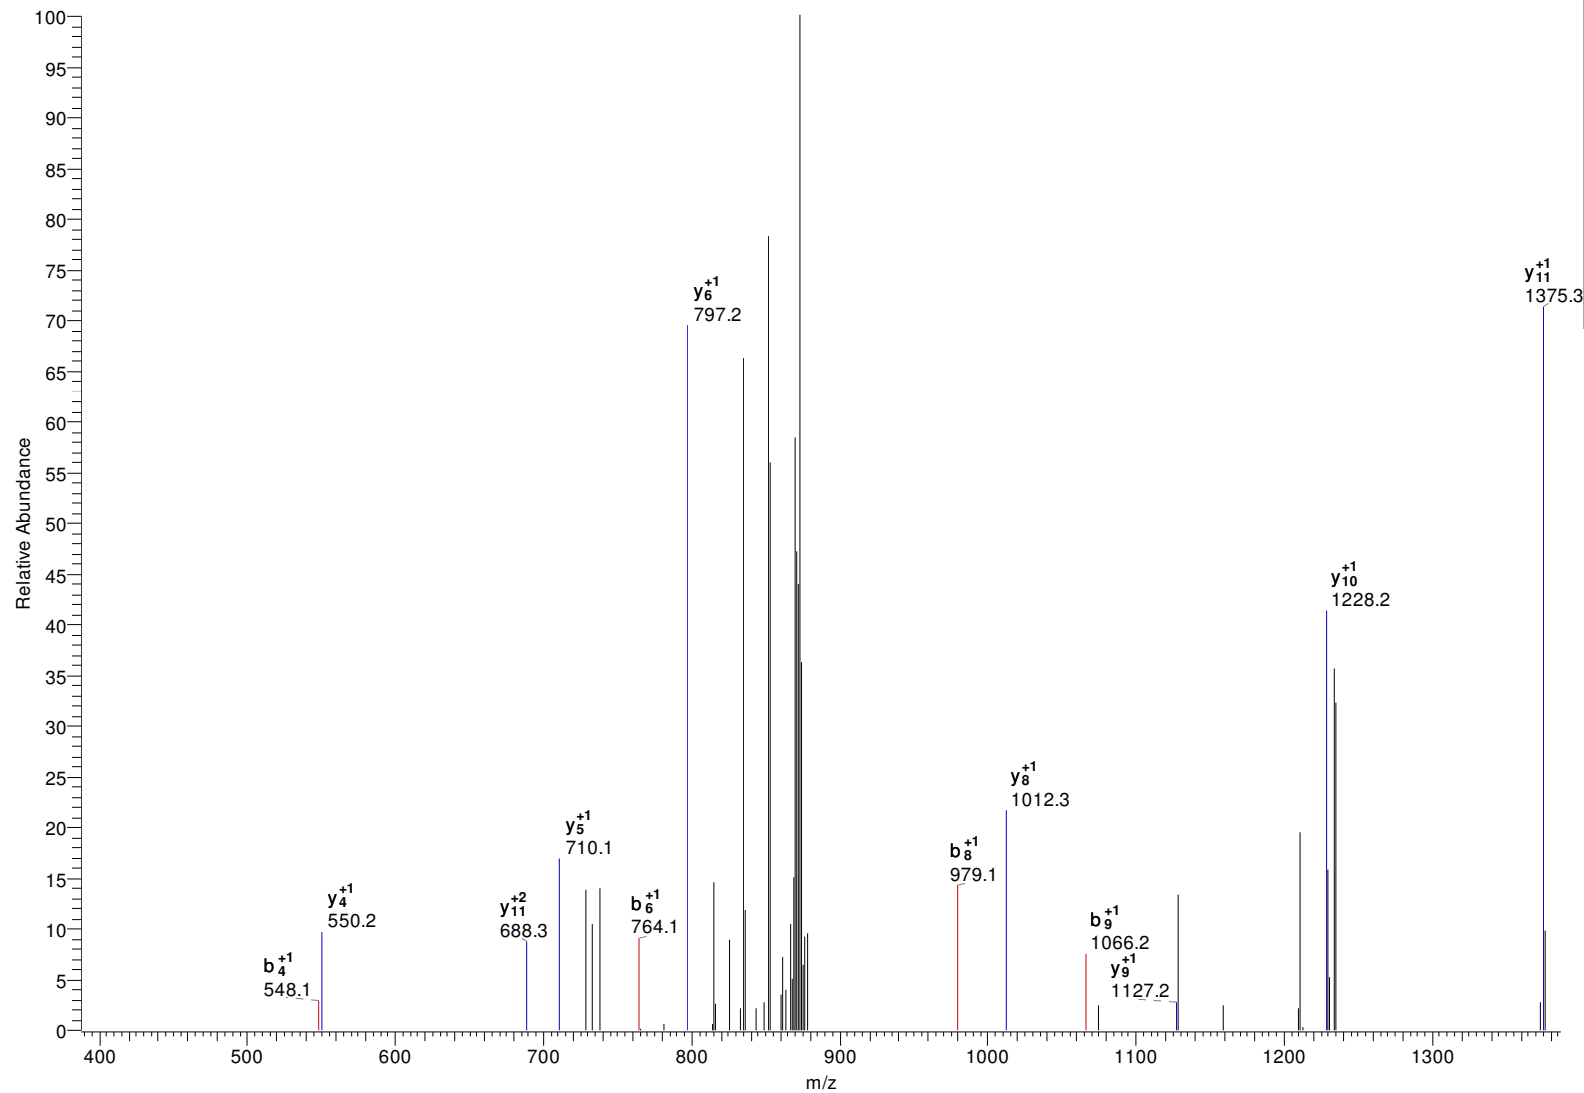

|    | AA | B       | Y       |    |
|----|----|---------|---------|----|
| 1  | D  | 116.03  | -       | 14 |
| 2  | W  | 302.11  | 1660.74 | 13 |
| 3  | V  | 401.18  | 1474.66 | 12 |
| 4  | F  | 548.25  | 1375.59 | 11 |
| 5  | T  | 649.30  | 1228.53 | 10 |
| 6  | D  | 764.32  | 1127.48 | 9  |
| 7  | S  | 851.36  | 1012.45 | 8  |
| 8  | Q  | 979.42  | 925.42  | 7  |
| 9  | S  | 1066.45 | 797.36  | 6  |
| 10 | C  | 1226.48 | 710.33  | 5  |
| 11 | F  | 1373.55 | 550.30  | 4  |
| 12 | L  | 1486.63 | 403.23  | 3  |
| 13 | D  | 1601.66 | 290.15  | 2  |
| 14 | R  | -       | 175.12  | 1  |

gi|70878778|gb|EAN92004.1| 40S ribosomal protein S12, putative [Trypanosoma cruzi]

R.ALEFLLSHLR.-

M+H=1198.694214

Delta=0.36370

z=2

P(pep)=1.32E-06

Xcorr=2.22

DCn=0.45

#5788-5788 NL: 3.75E1

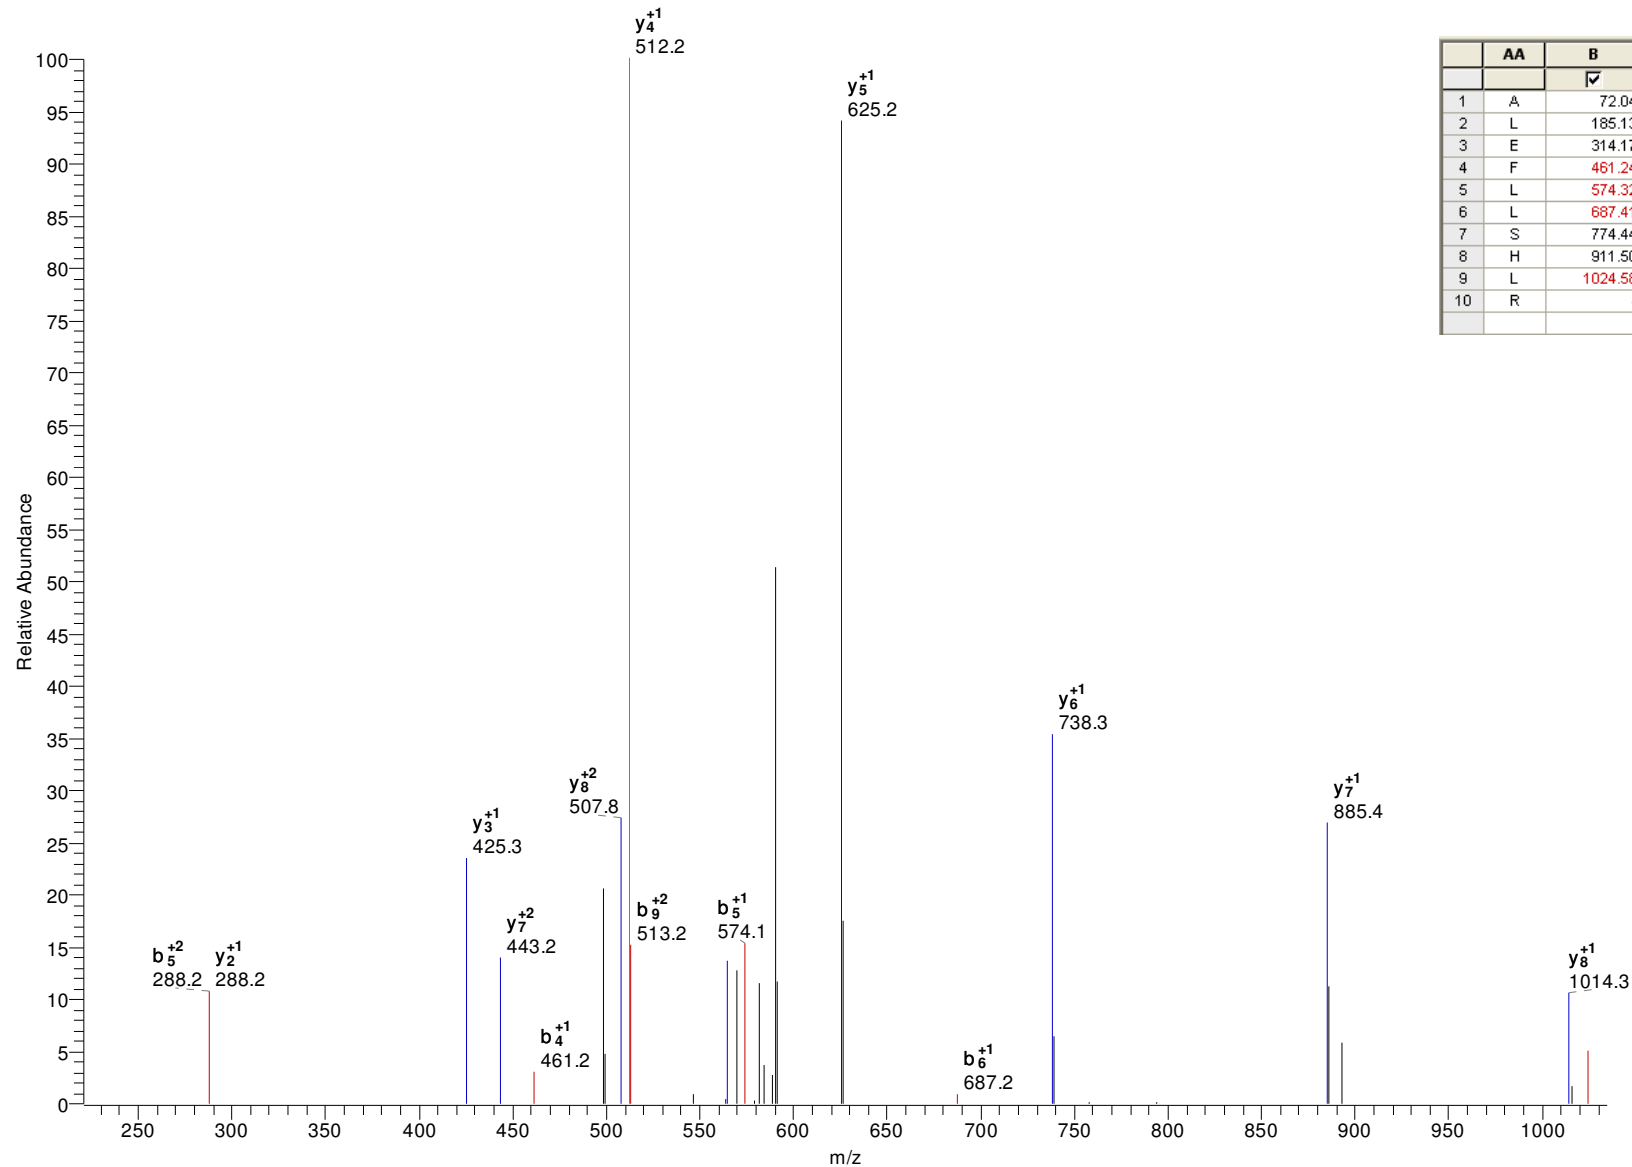

|    | AA | B       | Y       |    |
|----|----|---------|---------|----|
| 1  | A  | 72.04   | -       | 10 |
| 2  | L  | 185.13  | 1127.66 | 9  |
| 3  | E  | 314.17  | 1014.57 | 8  |
| 4  | F  | 461.24  | 885.53  | 7  |
| 5  | L  | 574.32  | 738.46  | 6  |
| 6  | L  | 687.41  | 625.38  | 5  |
| 7  | S  | 774.44  | 512.29  | 4  |
| 8  | H  | 911.50  | 425.26  | 3  |
| 9  | L  | 1024.58 | 288.20  | 2  |
| 10 | R  | -       | 175.12  | 1  |

gi|70874162|gb|EAN87884.1| ras-related protein rab-2a, putative [Trypanosoma cruzi]

K.TAQNVDDAFMK.T

M+H=1239.567383

DeltaM=0.98711

z=2

P(pep)=7.30E-05

Xcorr=2.21

DCn=0.41

#2720-2720 NL: 1.21E2

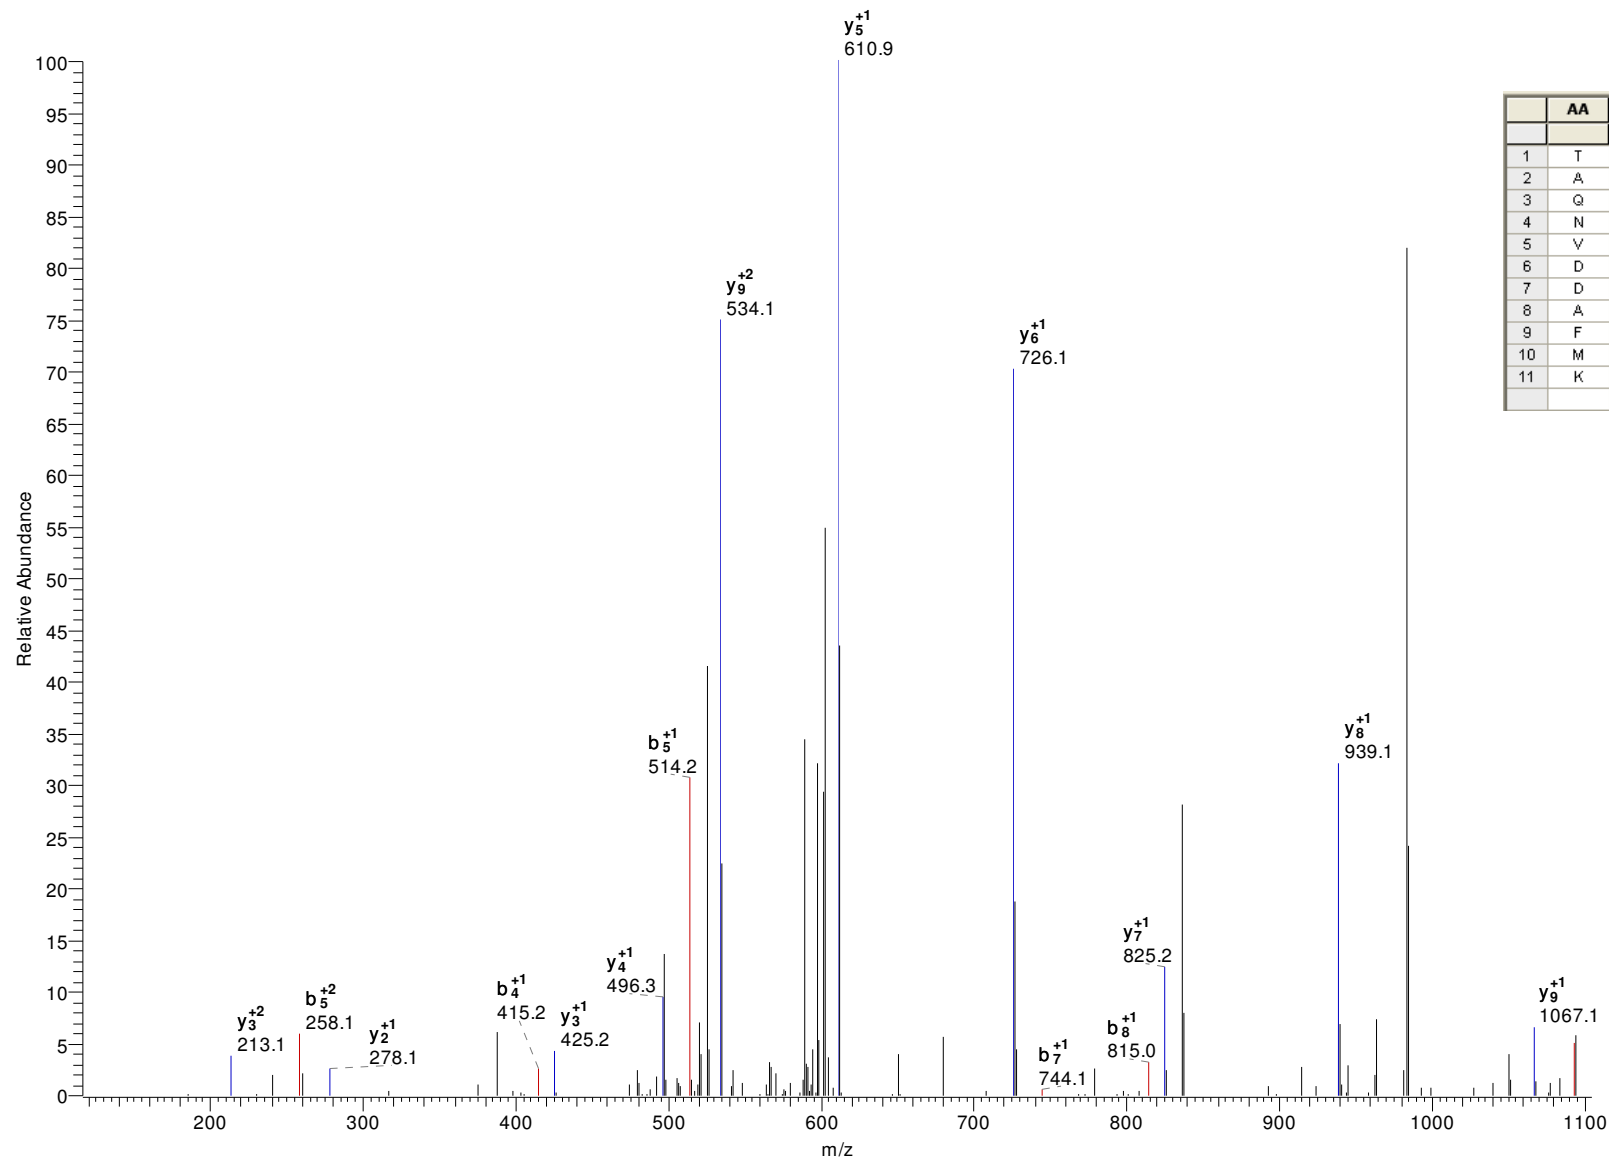

|    | AA | B       | Y       |    |
|----|----|---------|---------|----|
| 1  | T  | 102.05  | -       | 11 |
| 2  | A  | 173.09  | 1138.52 | 10 |
| 3  | Q  | 301.15  | 1067.48 | 9  |
| 4  | N  | 415.19  | 939.42  | 8  |
| 5  | V  | 514.26  | 825.38  | 7  |
| 6  | D  | 629.29  | 726.31  | 6  |
| 7  | D  | 744.32  | 611.29  | 5  |
| 8  | A  | 815.35  | 496.26  | 4  |
| 9  | F  | 962.42  | 425.22  | 3  |
| 10 | M  | 1093.46 | 278.15  | 2  |
| 11 | K  | -       | 147.11  | 1  |

gi|70870671|gb|EAN84965.1| DnaJ chaperone protein, putative [Trypanosoma cruzi]

R.YTFSQGDAFNIFR.S

M+H=1565.738281

DeltaM=1.54558

z=2

P(pep)=1.43E-07

Xcorr=2.21

DCn=0.39

#5551-5551 NL:2.28E1

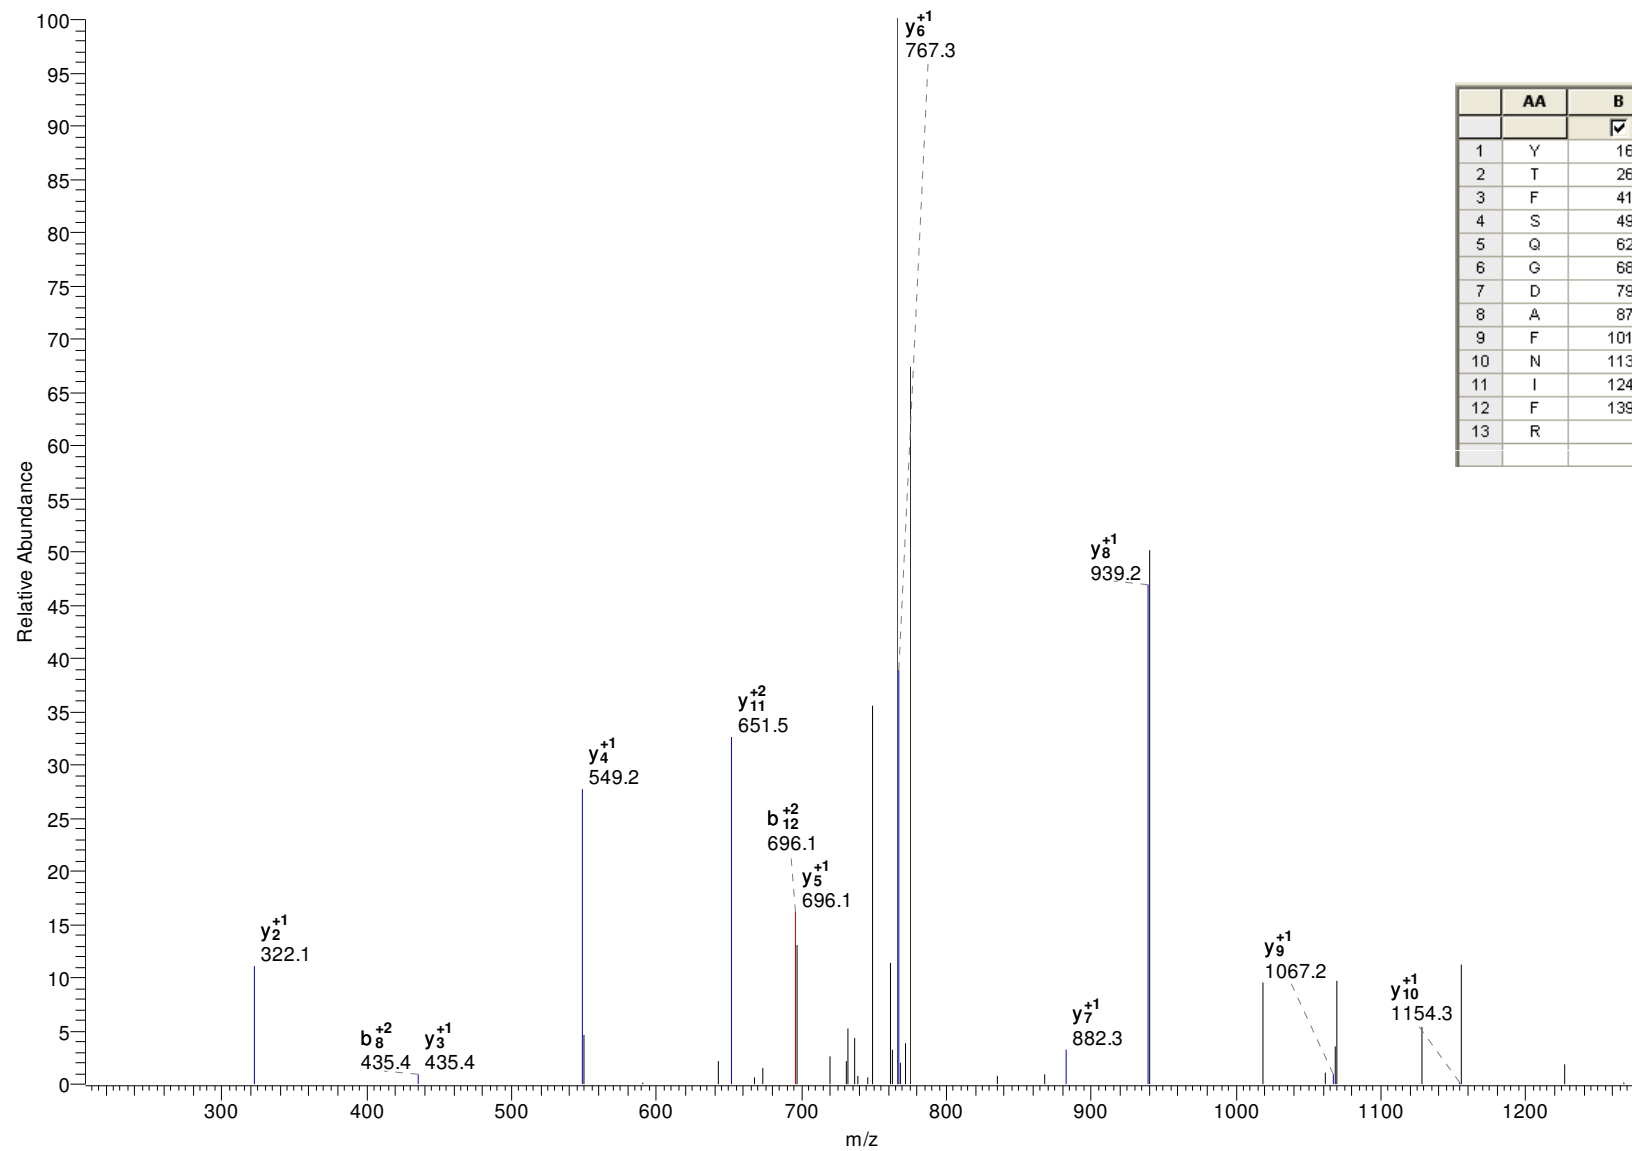

|    | AA | B       | Y       |    |
|----|----|---------|---------|----|
|    |    | ☑       | ☑       |    |
| 1  | Y  | 164.07  | -       | 13 |
| 2  | T  | 265.12  | 1402.67 | 12 |
| 3  | F  | 412.19  | 1301.63 | 11 |
| 4  | S  | 499.22  | 1154.56 | 10 |
| 5  | Q  | 627.28  | 1067.53 | 9  |
| 6  | G  | 684.30  | 939.47  | 8  |
| 7  | D  | 799.33  | 882.45  | 7  |
| 8  | A  | 870.36  | 767.42  | 6  |
| 9  | F  | 1017.43 | 696.38  | 5  |
| 10 | N  | 1131.47 | 549.31  | 4  |
| 11 | I  | 1244.56 | 435.27  | 3  |
| 12 | F  | 1391.63 | 322.19  | 2  |
| 13 | R  | -       | 175.12  | 1  |



gi|70881221|gb|EAN94265.1| hypothetical protein, conserved [Trypanosoma cruzi]

K.LPDCDVVANNR.N

M+H=1272.600098

DeltaM=0.45671

z=2

P(pep)=2.24E-05

Xcorr=2.21

DCn=0.45

#2253-2253 NL: 1.62E2

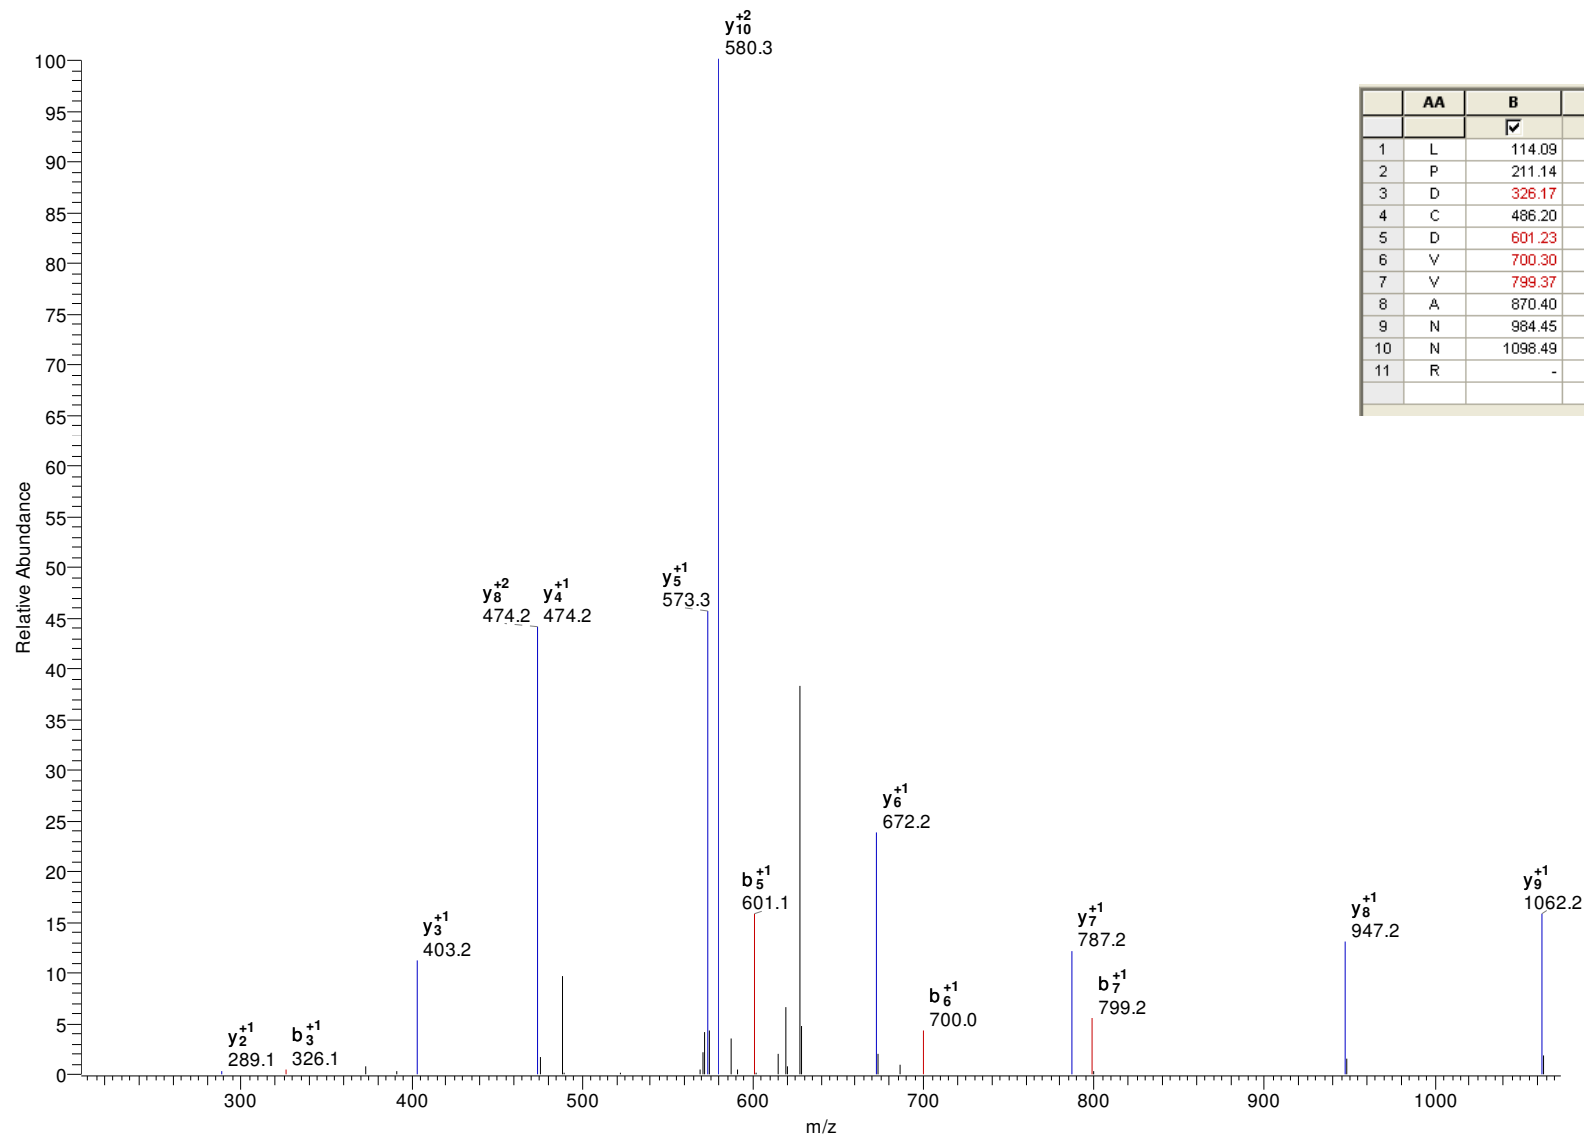

|    | AA | B       | Y       |    |
|----|----|---------|---------|----|
|    |    | ✓       | ✓       |    |
| 1  | L  | 114.09  | -       | 11 |
| 2  | P  | 211.14  | 1159.52 | 10 |
| 3  | D  | 326.17  | 1062.46 | 9  |
| 4  | C  | 486.20  | 947.44  | 8  |
| 5  | D  | 601.23  | 787.41  | 7  |
| 6  | V  | 700.30  | 672.38  | 6  |
| 7  | V  | 799.37  | 573.31  | 5  |
| 8  | A  | 870.40  | 474.24  | 4  |
| 9  | N  | 984.45  | 403.20  | 3  |
| 10 | N  | 1098.49 | 289.16  | 2  |
| 11 | R  | -       | 175.12  | 1  |

gi|70871028|gb|EAN85254.1| hypothetical protein, conserved [Trypanosoma cruzi]

R.IGSETYGGWPVK.L

M+H=1576.779419

DeltaM=1.21086

z=2

P(pep)=4.77E-05

Xcorr=2.19

DCn=0.44

#4976-4976 NL: 4.32E1

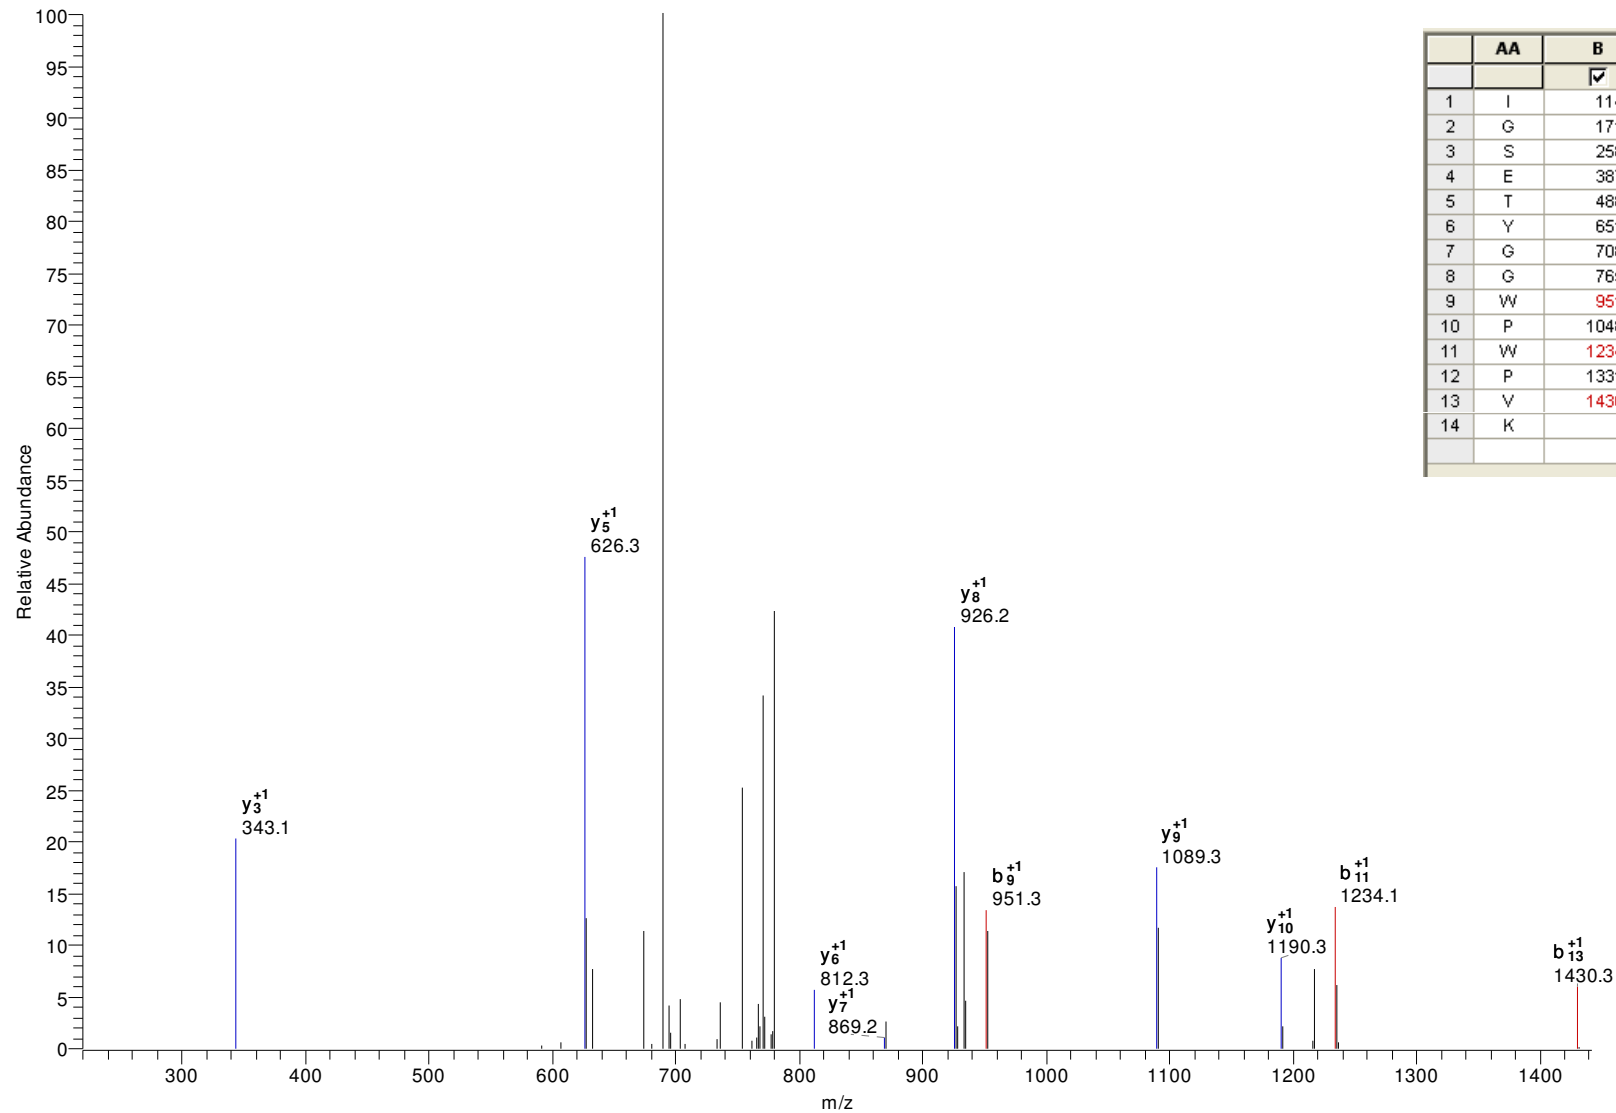

|    | AA | B                                   | Y                                   |    |
|----|----|-------------------------------------|-------------------------------------|----|
|    |    | <input checked="" type="checkbox"/> | <input checked="" type="checkbox"/> |    |
| 1  | I  | 114.09                              | -                                   | 14 |
| 2  | G  | 171.11                              | 1463.70                             | 13 |
| 3  | S  | 258.14                              | 1406.67                             | 12 |
| 4  | E  | 387.19                              | 1319.64                             | 11 |
| 5  | T  | 488.24                              | 1190.60                             | 10 |
| 6  | Y  | 651.30                              | 1089.55                             | 9  |
| 7  | G  | 708.32                              | 926.49                              | 8  |
| 8  | G  | 765.34                              | 869.47                              | 7  |
| 9  | W  | 951.42                              | 812.45                              | 6  |
| 10 | P  | 1048.47                             | 626.37                              | 5  |
| 11 | W  | 1234.55                             | 529.31                              | 4  |
| 12 | P  | 1331.61                             | 343.23                              | 3  |
| 13 | V  | 1430.67                             | 246.18                              | 2  |
| 14 | K  | -                                   | 147.11                              | 1  |

gi|70881841|gb|EAN94845.1| calpain cysteine peptidase, putative [Trypanosoma cruzi]  
K.EFAVDFPTDDTILAECLER.D M+H=2241.038086 DeltaM=1.02934 z=2  
P(pep)=0.000196705 Xcorr=2.14 DCn=0.49

#5736-5736 NL: 3.04E1

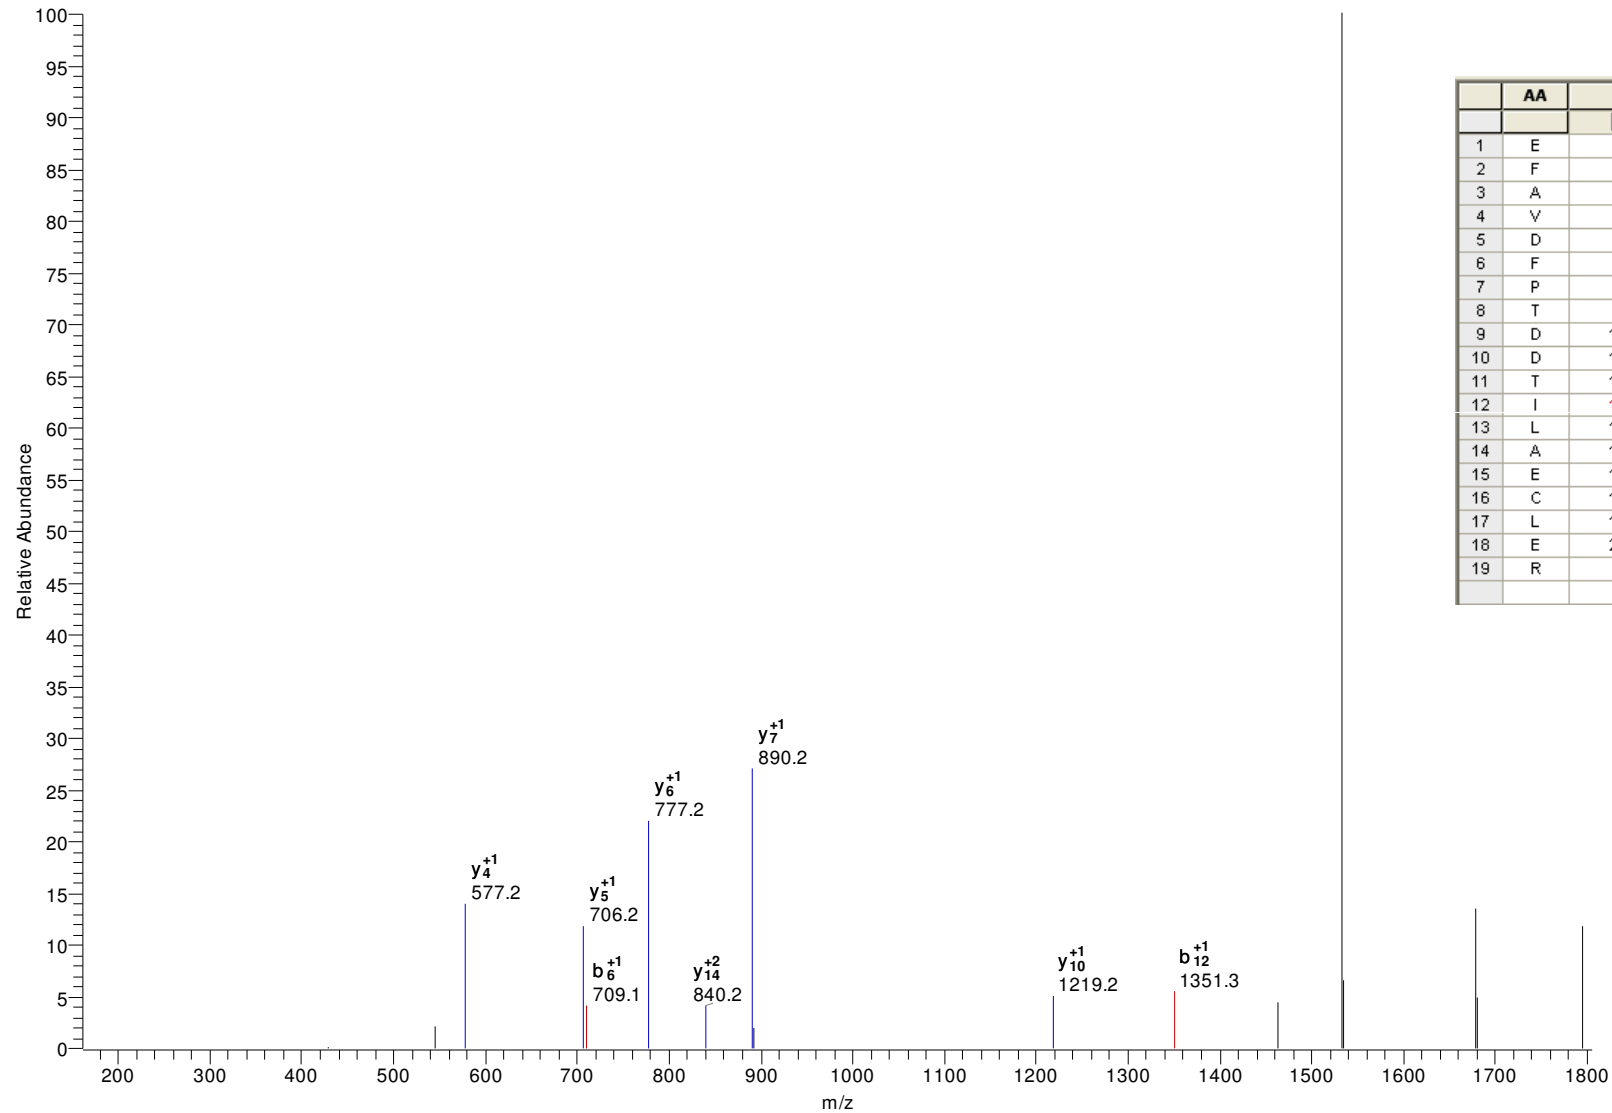

|    | AA | B       | Y       |    |
|----|----|---------|---------|----|
|    |    | ✓       | ✓       |    |
| 1  | E  | 130.05  | -       | 19 |
| 2  | F  | 277.12  | 2112.00 | 18 |
| 3  | A  | 348.16  | 1964.93 | 17 |
| 4  | V  | 447.22  | 1893.89 | 16 |
| 5  | D  | 562.25  | 1794.82 | 15 |
| 6  | F  | 709.32  | 1679.79 | 14 |
| 7  | P  | 806.37  | 1532.73 | 13 |
| 8  | T  | 907.42  | 1435.67 | 12 |
| 9  | D  | 1022.45 | 1334.63 | 11 |
| 10 | D  | 1137.47 | 1219.60 | 10 |
| 11 | T  | 1238.52 | 1104.57 | 9  |
| 12 | I  | 1351.61 | 1003.52 | 8  |
| 13 | L  | 1464.69 | 890.44  | 7  |
| 14 | A  | 1535.73 | 777.36  | 6  |
| 15 | E  | 1664.77 | 706.32  | 5  |
| 16 | C  | 1824.80 | 577.28  | 4  |
| 17 | L  | 1937.88 | 417.25  | 3  |
| 18 | E  | 2066.93 | 304.16  | 2  |
| 19 | R  | -       | 175.12  | 1  |

gi|70886966|gb|EAN99732.1| hypothetical protein Tc00.1047053506925.360 [Trypanosoma cruzi]

K.EAYLAANNGLPGVK.G

M+H=1473.769653

DeltaM=0.92778

z=2

P(pep)=0.000511411

Xcorr=2.12

DCn=0.12

#3071-3071 NL: 6.46E1

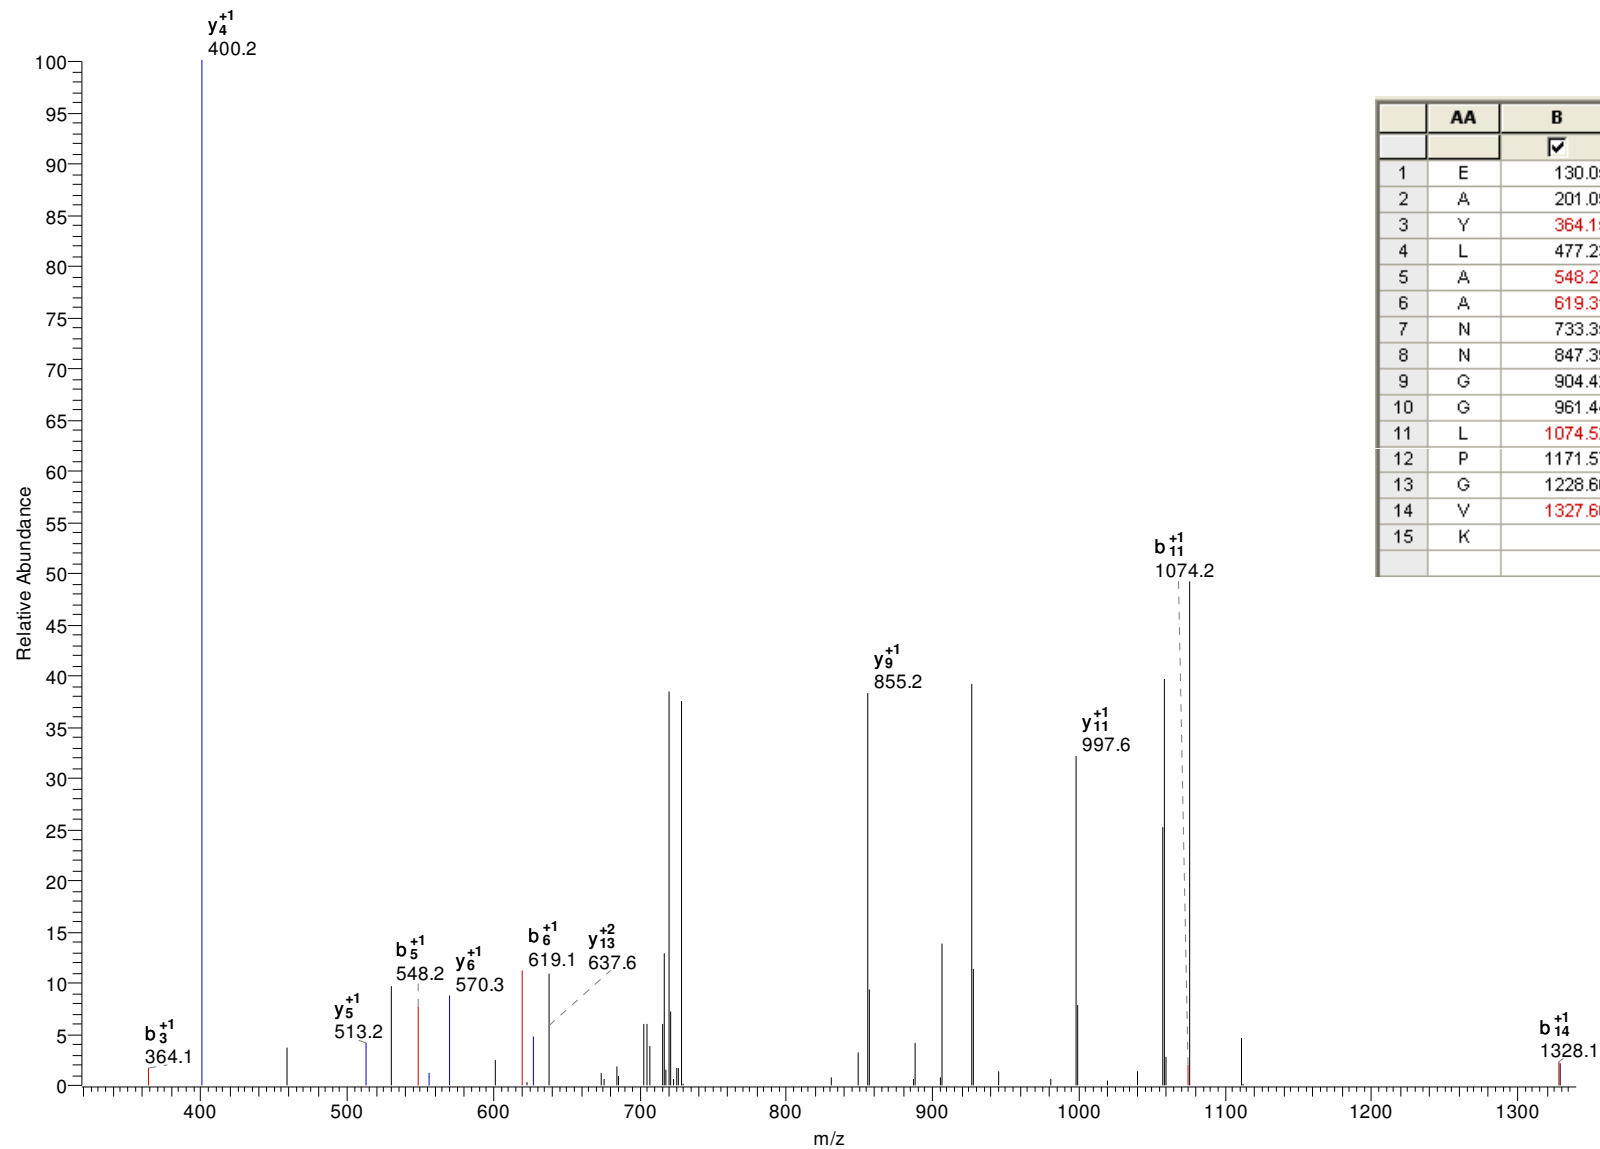

|    | AA | B                                   | Y                                   |    |
|----|----|-------------------------------------|-------------------------------------|----|
|    |    | <input checked="" type="checkbox"/> | <input checked="" type="checkbox"/> |    |
| 1  | E  | 130.05                              | -                                   | 15 |
| 2  | A  | 201.09                              | 1344.73                             | 14 |
| 3  | Y  | 364.15                              | 1273.69                             | 13 |
| 4  | L  | 477.23                              | 1110.63                             | 12 |
| 5  | A  | 548.27                              | 997.54                              | 11 |
| 6  | A  | 619.31                              | 926.51                              | 10 |
| 7  | N  | 733.35                              | 855.47                              | 9  |
| 8  | N  | 847.39                              | 741.43                              | 8  |
| 9  | G  | 904.42                              | 627.36                              | 7  |
| 10 | G  | 961.44                              | 570.36                              | 6  |
| 11 | L  | 1074.52                             | 513.34                              | 5  |
| 12 | P  | 1171.57                             | 400.26                              | 4  |
| 13 | G  | 1228.60                             | 303.20                              | 3  |
| 14 | V  | 1327.66                             | 246.18                              | 2  |
| 15 | K  | -                                   | 147.11                              | 1  |

gi|70877464|gb|EAN90805.1| cation transporter, putative [Trypanosoma cruzi]

R.LSPFLFVLGK.C

M+H=1120.676514

DeltaM=1.60381

z=2

P(pep)=0.000130972

Xcorr=2.11

DCn=0.33

#6609-6609 NL: 1.22E3

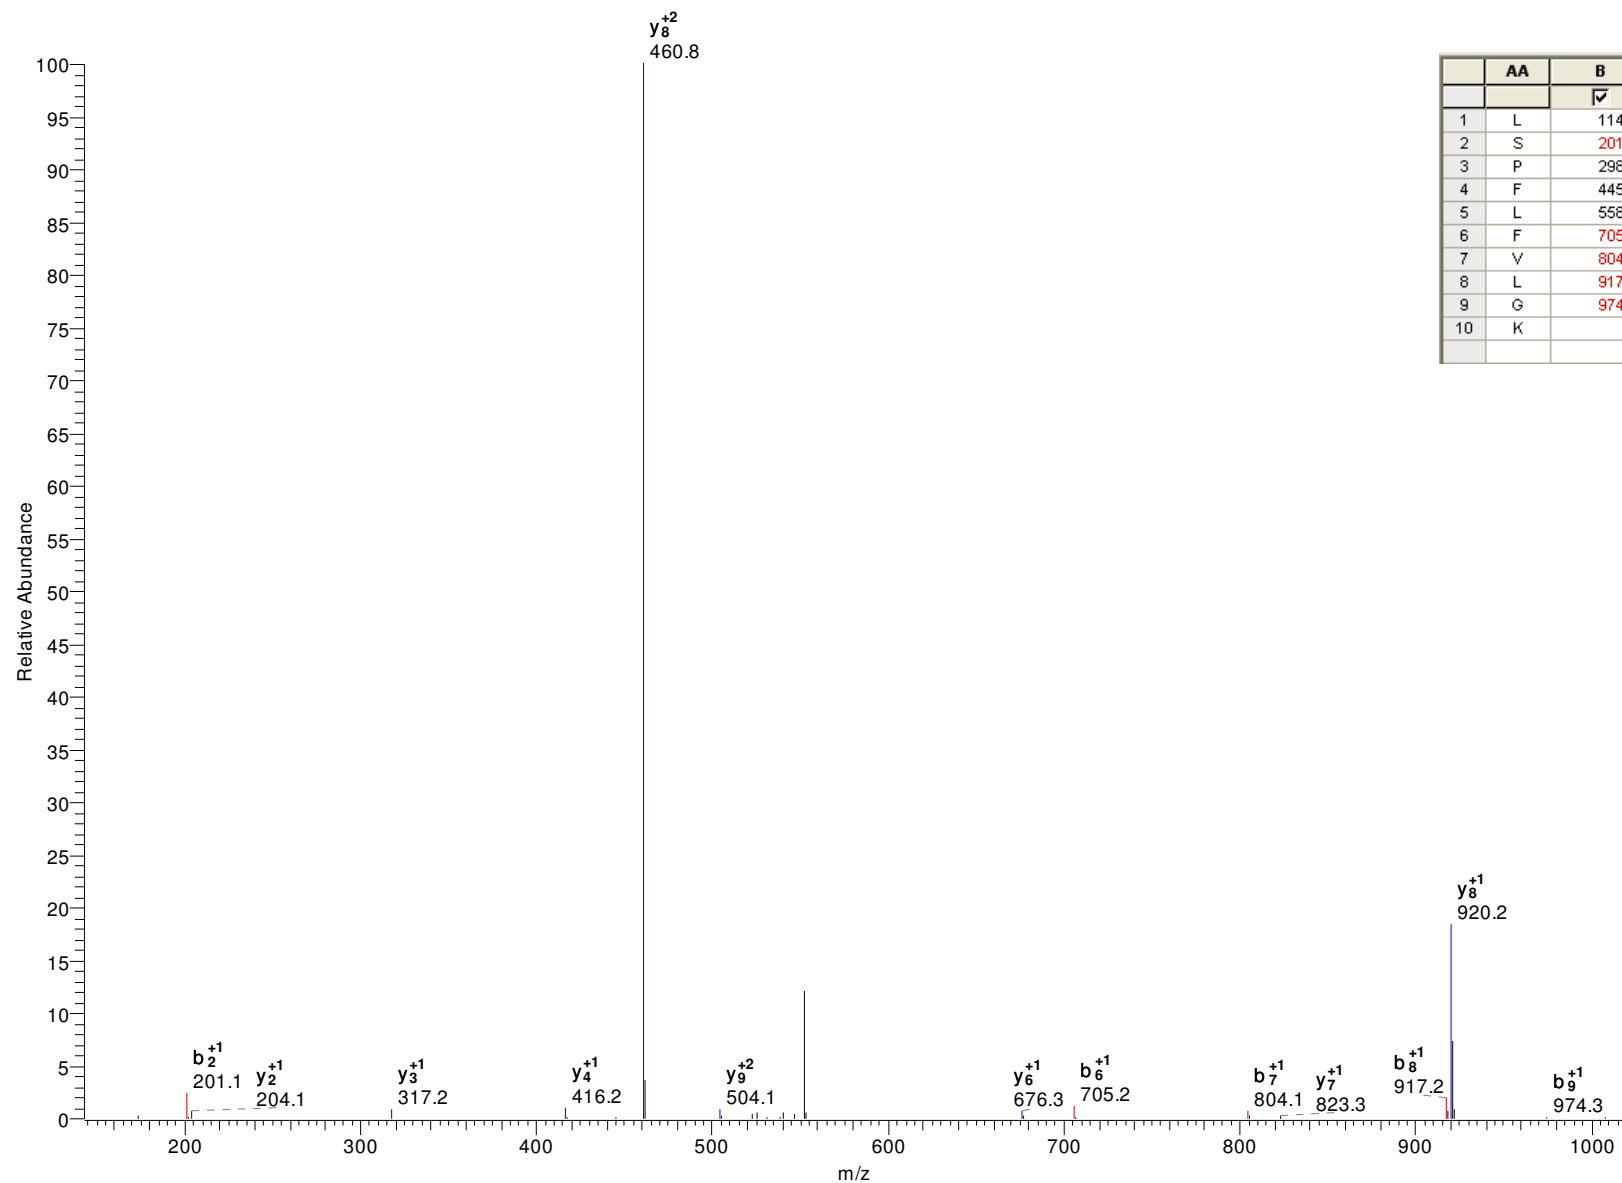

|    | AA | B                                   | Y                                   |    |
|----|----|-------------------------------------|-------------------------------------|----|
|    |    | <input checked="" type="checkbox"/> | <input checked="" type="checkbox"/> |    |
| 1  | L  | 114.09                              | -                                   | 10 |
| 2  | S  | 201.12                              | 1007.59                             | 9  |
| 3  | P  | 298.18                              | 920.56                              | 8  |
| 4  | F  | 445.24                              | 823.51                              | 7  |
| 5  | L  | 558.33                              | 676.44                              | 6  |
| 6  | F  | 705.40                              | 563.36                              | 5  |
| 7  | V  | 804.47                              | 416.29                              | 4  |
| 8  | L  | 917.55                              | 317.22                              | 3  |
| 9  | G  | 974.57                              | 204.13                              | 2  |
| 10 | K  | -                                   | 147.11                              | 1  |

gi|70883150|gb|EAN96077.1| 40S ribosomal protein S8, putative [Trypanosoma cruzi]  
 R.ILDVVYNATSNELVR.T M+H=1705.911865 DeltaM=0.76457  
 P(pep)=3.80E-05 Xcorr=2.10 DCn=0.46

z=2

#4489-4489 NL: 3.36E1

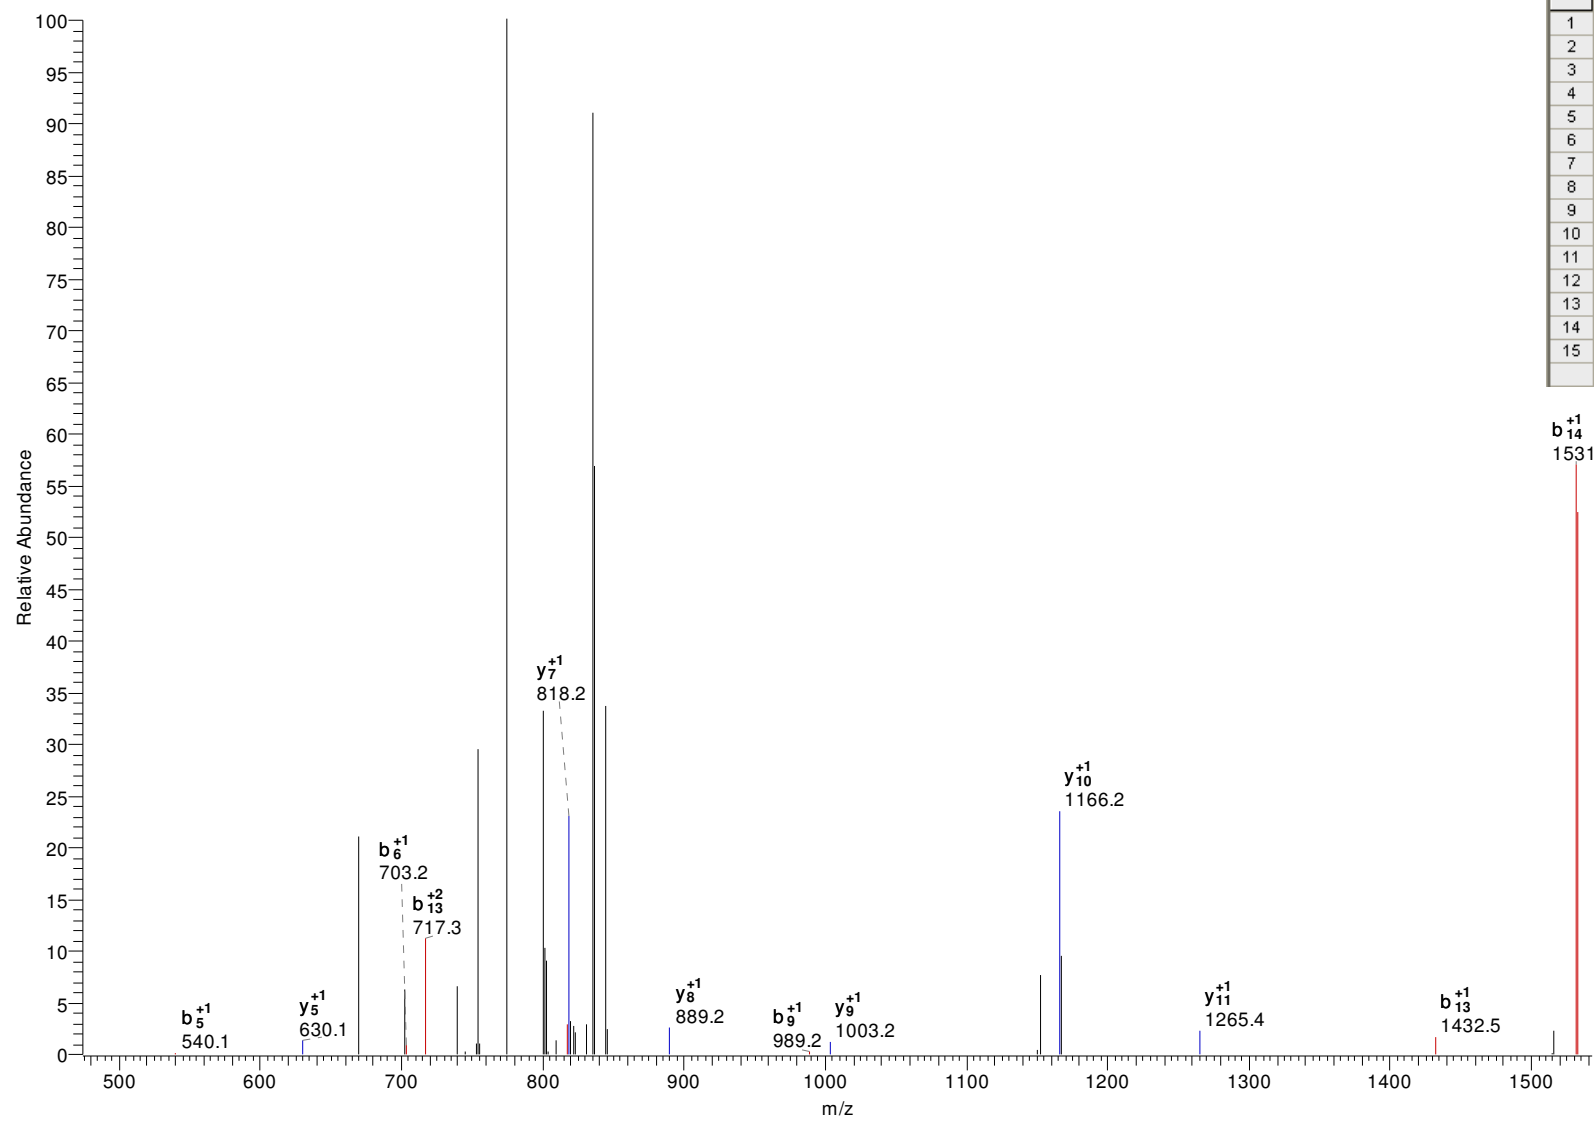

|    | AA | B       | Y       |    |
|----|----|---------|---------|----|
|    |    | ✓       | ✓       |    |
| 1  | I  | 114.09  | -       | 15 |
| 2  | L  | 227.18  | 1592.83 | 14 |
| 3  | D  | 342.20  | 1479.74 | 13 |
| 4  | V  | 441.27  | 1364.72 | 12 |
| 5  | V  | 540.34  | 1265.65 | 11 |
| 6  | Y  | 703.40  | 1166.58 | 10 |
| 7  | N  | 817.45  | 1003.52 | 9  |
| 8  | A  | 886.48  | 889.47  | 8  |
| 9  | T  | 989.53  | 818.44  | 7  |
| 10 | S  | 1076.56 | 717.39  | 6  |
| 11 | N  | 1190.61 | 630.36  | 5  |
| 12 | E  | 1319.65 | 516.31  | 4  |
| 13 | L  | 1432.73 | 387.27  | 3  |
| 14 | V  | 1531.80 | 274.19  | 2  |
| 15 | R  | -       | 175.12  | 1  |

gi|70881384|gb|EAN94418.1| hypothetical protein, conserved [Trypanosoma cruzi]

R.EYLETFVAEVVR.Q

M+H=1454.752563

DeltaM=1.86943

z=2

P(pep)=1.10E-06

Xcorr=2.09

DCn=0.40

#6110-6110 NL: 1.12E1

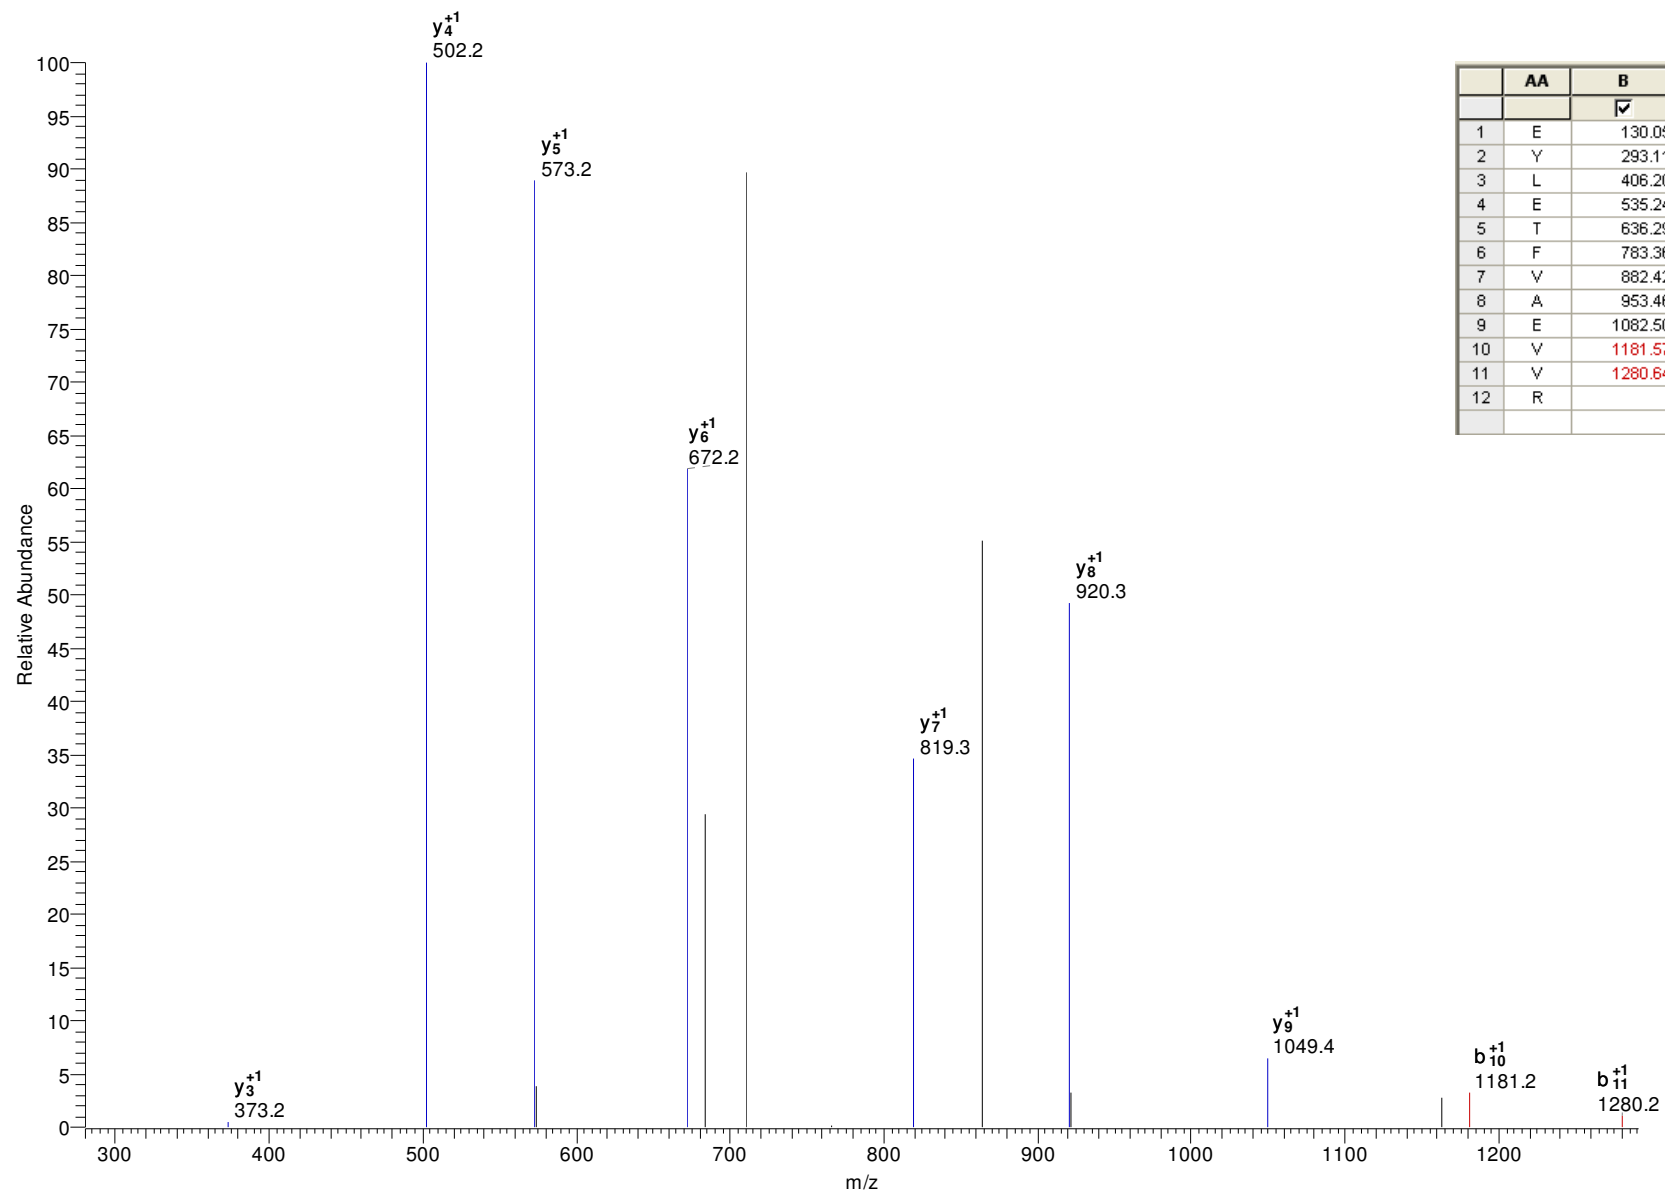

|    | AA | B       | Y       |    |
|----|----|---------|---------|----|
|    |    | ✓       | ✓       |    |
| 1  | E  | 130.05  | -       | 12 |
| 2  | Y  | 293.11  | 1325.71 | 11 |
| 3  | L  | 406.20  | 1162.65 | 10 |
| 4  | E  | 535.24  | 1049.58 | 9  |
| 5  | T  | 636.29  | 920.52  | 8  |
| 6  | F  | 783.36  | 819.47  | 7  |
| 7  | V  | 882.42  | 672.40  | 6  |
| 8  | A  | 953.46  | 573.34  | 5  |
| 9  | E  | 1082.50 | 502.30  | 4  |
| 10 | V  | 1181.57 | 373.26  | 3  |
| 11 | V  | 1280.64 | 274.19  | 2  |
| 12 | R  | -       | 175.12  | 1  |

gi|70867546|gb|EAN82674.1| hypothetical protein, conserved [Trypanosoma cruzi]

-.NELAGGPFGGQFTFLK.-

M+H=1682.853638

DeltaM=1.28594

z=2

P(pep)=9.87E-07

Xcorr=2.08

DCn=0.27

#5410-5410 NL: 1.79E2

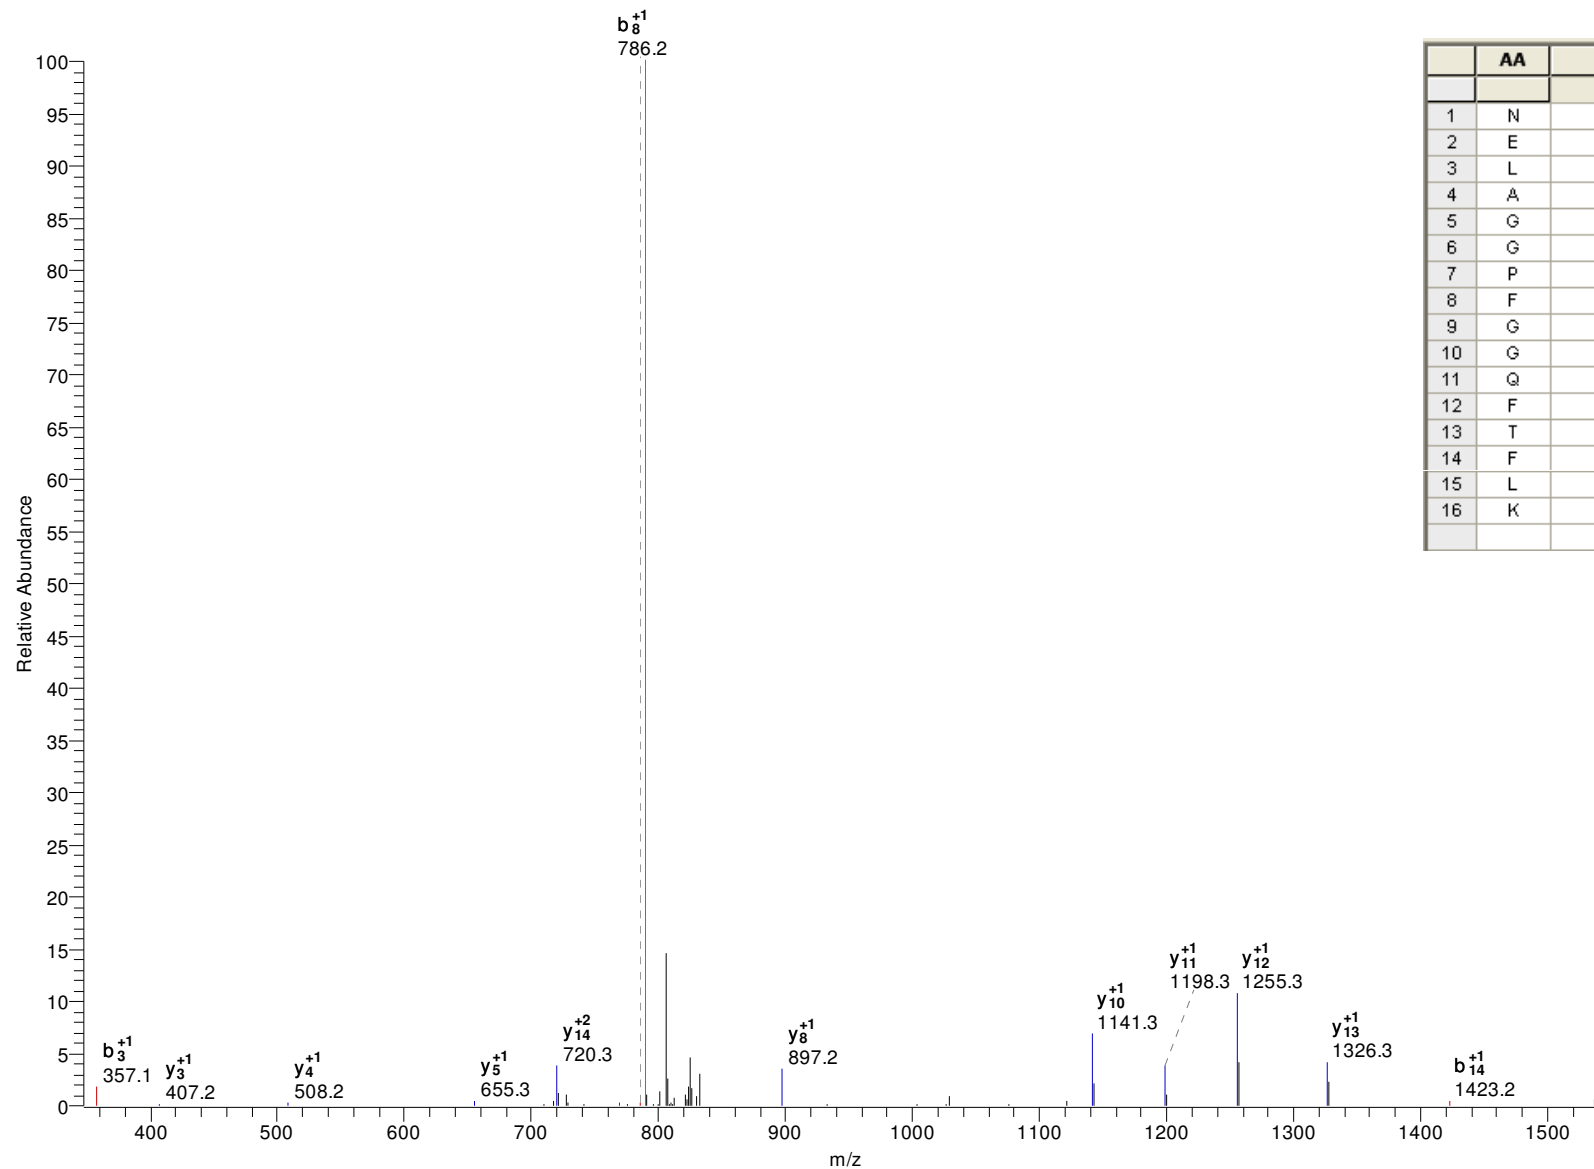

|    | AA | B                                   | Y                                   |    |
|----|----|-------------------------------------|-------------------------------------|----|
|    |    | <input checked="" type="checkbox"/> | <input checked="" type="checkbox"/> |    |
| 1  | N  | 115.05                              | -                                   | 16 |
| 2  | E  | 244.09                              | 1568.81                             | 15 |
| 3  | L  | 357.18                              | 1439.77                             | 14 |
| 4  | A  | 428.21                              | 1326.68                             | 13 |
| 5  | G  | 485.24                              | 1255.65                             | 12 |
| 6  | G  | 542.26                              | 1198.63                             | 11 |
| 7  | P  | 639.31                              | 1141.60                             | 10 |
| 8  | F  | 786.38                              | 1044.55                             | 9  |
| 9  | G  | 843.40                              | 897.48                              | 8  |
| 10 | G  | 900.42                              | 840.46                              | 7  |
| 11 | Q  | 1028.48                             | 783.44                              | 6  |
| 12 | F  | 1175.55                             | 655.38                              | 5  |
| 13 | T  | 1276.60                             | 508.31                              | 4  |
| 14 | F  | 1423.66                             | 407.27                              | 3  |
| 15 | L  | 1536.75                             | 260.20                              | 2  |
| 16 | K  | -                                   | 147.11                              | 1  |



gi|70881155|gb|EAN94202.1| phosphate-repressible phosphate permease, putative [Trypanosoma cruzi]

-.TLVLRPANSVQR.-

M+H=1353.796143

DeltaM=1.21172

z=2

P(pep)=9.18E-05

Xcorr=2.07

DCn=0.34

#2444-2444 NL: 1.02E2

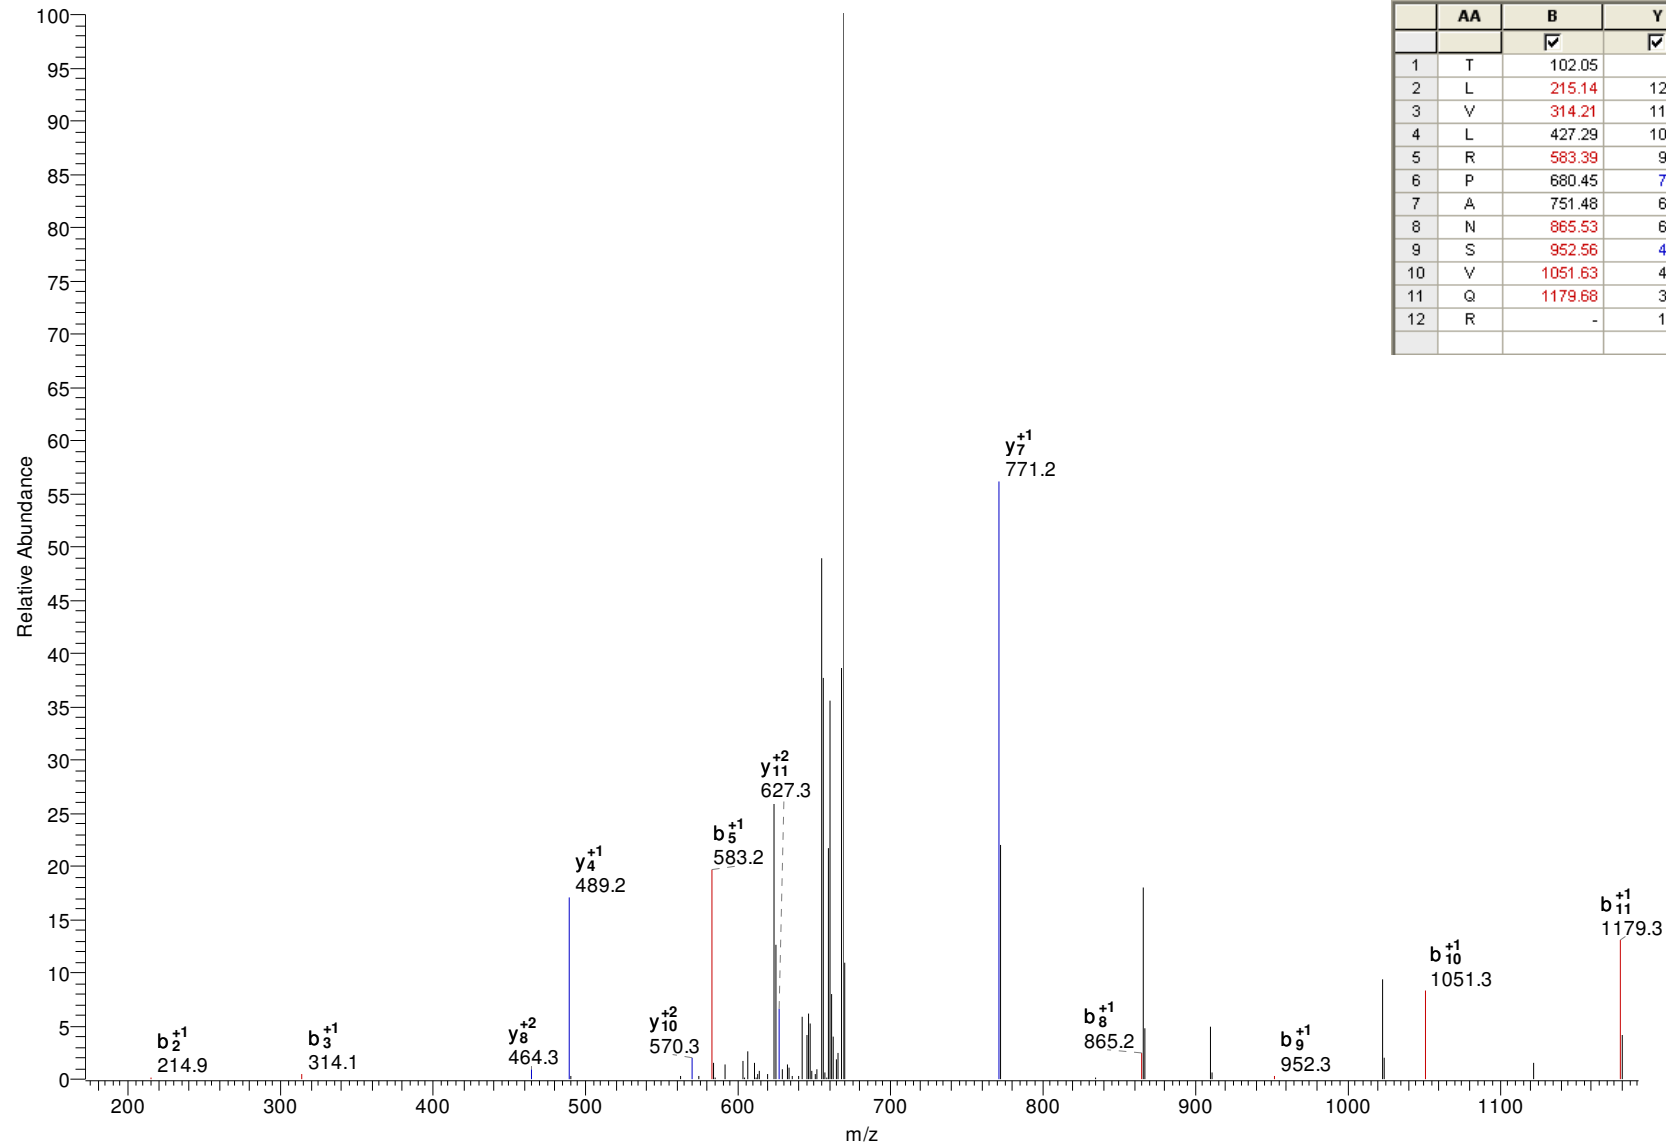

|    | AA | B       | Y       |    |
|----|----|---------|---------|----|
|    |    | ✓       | ✓       |    |
| 1  | T  | 102.05  | -       | 12 |
| 2  | L  | 215.14  | 1252.75 | 11 |
| 3  | V  | 314.21  | 1139.66 | 10 |
| 4  | L  | 427.29  | 1040.60 | 9  |
| 5  | R  | 583.39  | 927.51  | 8  |
| 6  | P  | 680.45  | 771.41  | 7  |
| 7  | A  | 751.48  | 674.36  | 6  |
| 8  | N  | 865.53  | 603.32  | 5  |
| 9  | S  | 952.56  | 489.28  | 4  |
| 10 | V  | 1051.63 | 402.25  | 3  |
| 11 | Q  | 1179.68 | 303.18  | 2  |
| 12 | R  | -       | 175.12  | 1  |

gi|70882514|gb|EAN95480.1| endomembrane protein, putative [Trypanosoma cruzi]

K.IGPLNNAFETYDLFR.V

M+H=1769.885742

DeltaM=1.82475

z=2

P(pep)=9.78E-06

Xcorr=2.04

DCn=0.41

#5810-5810 NL: 3.40E1

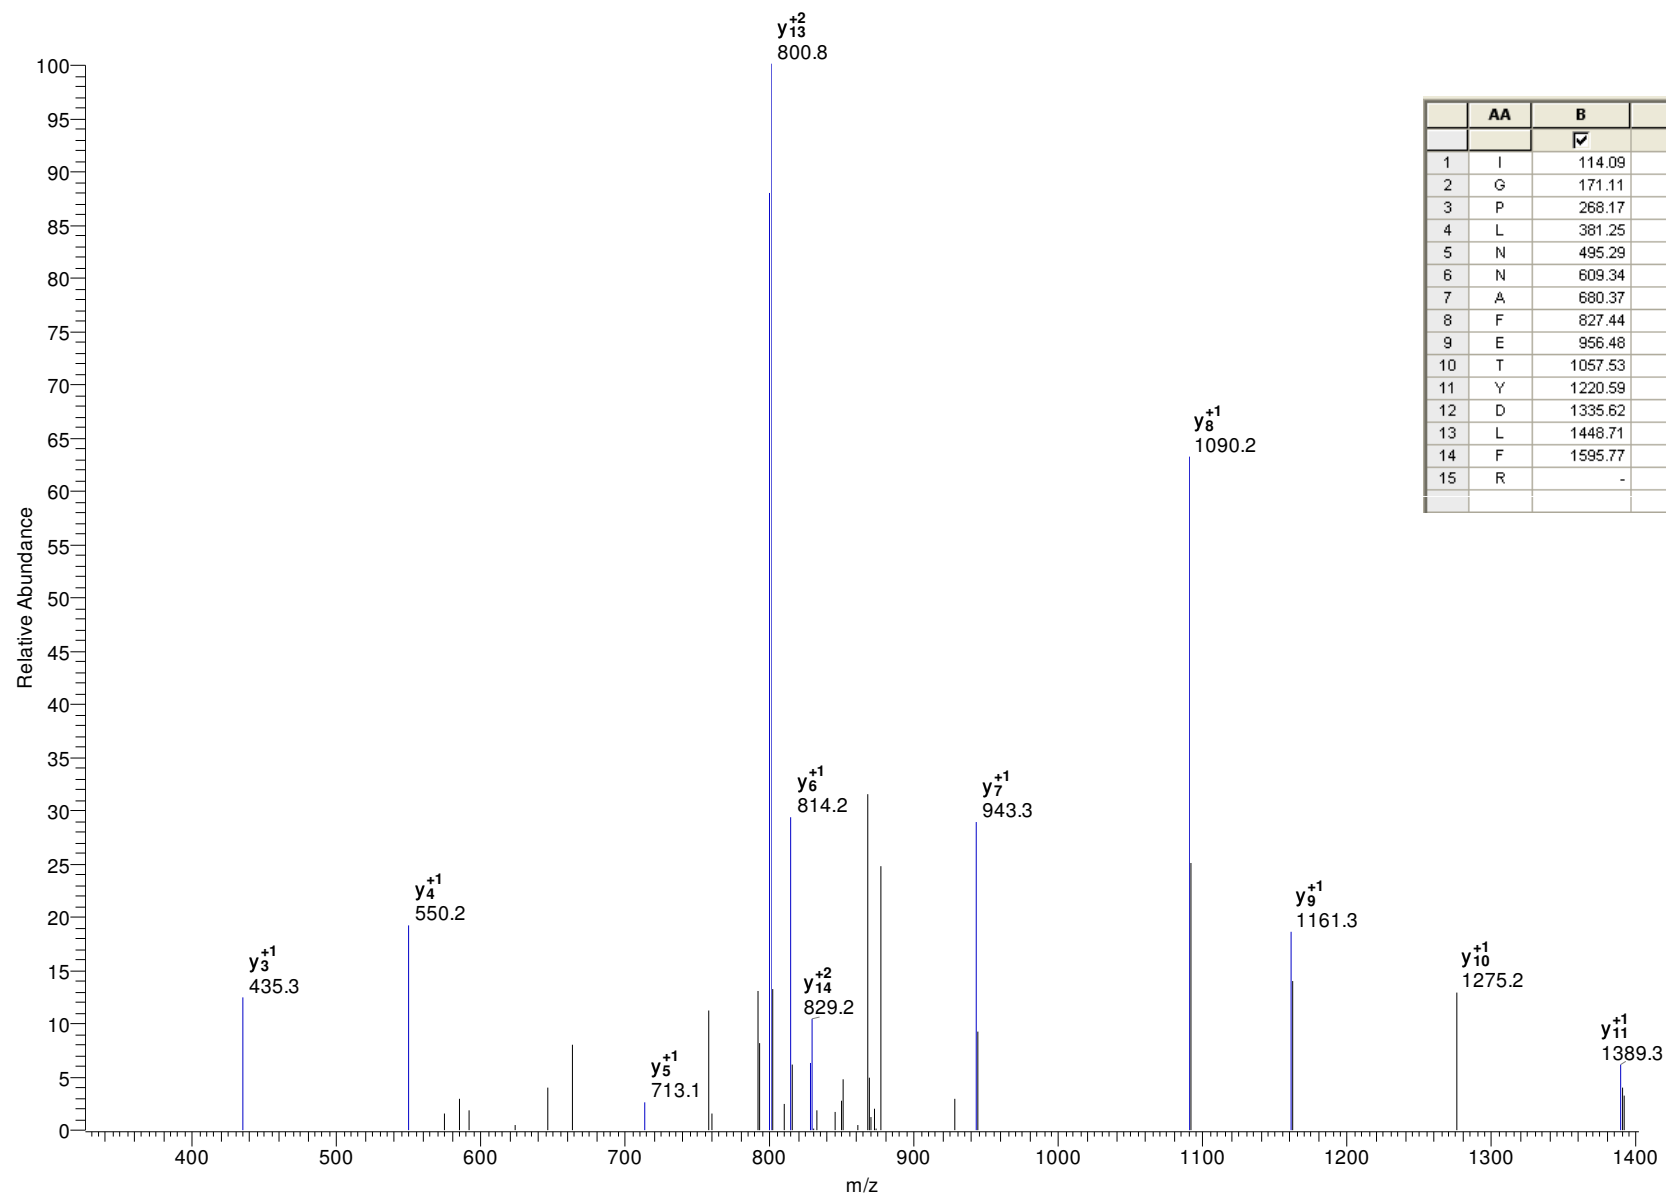

|    | AA | B       | Y       |    |
|----|----|---------|---------|----|
|    |    | ✓       | ✓       |    |
| 1  | I  | 114.09  | -       | 15 |
| 2  | G  | 171.11  | 1656.80 | 14 |
| 3  | P  | 268.17  | 1599.78 | 13 |
| 4  | L  | 381.25  | 1502.73 | 12 |
| 5  | N  | 495.29  | 1389.64 | 11 |
| 6  | N  | 609.34  | 1275.60 | 10 |
| 7  | A  | 680.37  | 1161.56 | 9  |
| 8  | F  | 827.44  | 1090.52 | 8  |
| 9  | E  | 956.48  | 943.45  | 7  |
| 10 | T  | 1057.53 | 814.41  | 6  |
| 11 | Y  | 1220.59 | 713.36  | 5  |
| 12 | D  | 1335.62 | 550.30  | 4  |
| 13 | L  | 1448.71 | 435.27  | 3  |
| 14 | F  | 1595.77 | 322.19  | 2  |
| 15 | R  | -       | 175.12  | 1  |

gi|70869739|gb|EAN84247.1| extracellular receptor, putative [Trypanosoma cruzi]

-.TAGLTILSAHTSNPK.-

M+H=1510.822388

DeltaM=1.37322

z=2

P(pep)=9.46E-06

Xcorr=2.01

DCn=0.30

#3038-3038 NL: 7.08E1

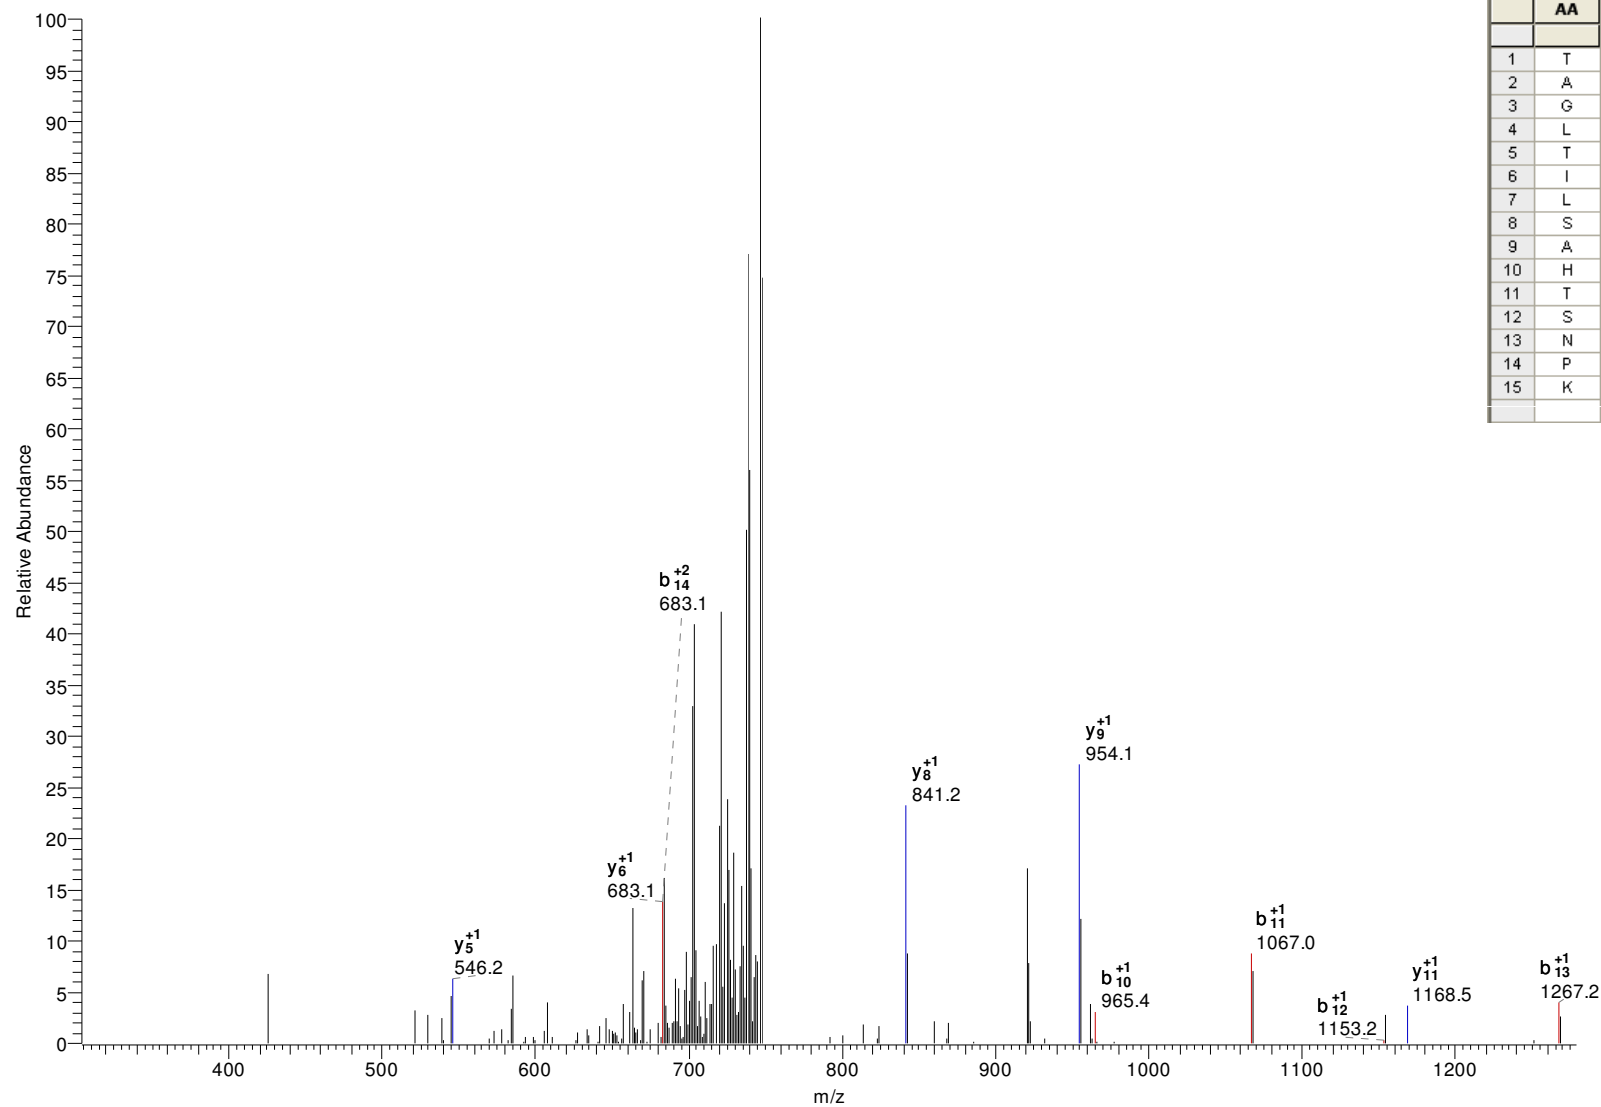

|    | AA | B                                   | Y                                   |    |
|----|----|-------------------------------------|-------------------------------------|----|
|    |    | <input checked="" type="checkbox"/> | <input checked="" type="checkbox"/> |    |
| 1  | T  | 102.05                              | -                                   | 15 |
| 2  | A  | 173.09                              | 1409.77                             | 14 |
| 3  | G  | 230.11                              | 1338.74                             | 13 |
| 4  | L  | 343.20                              | 1281.72                             | 12 |
| 5  | T  | 444.25                              | 1168.63                             | 11 |
| 6  | I  | 557.33                              | 1067.58                             | 10 |
| 7  | L  | 670.41                              | 954.50                              | 9  |
| 8  | S  | 757.45                              | 841.42                              | 8  |
| 9  | A  | 828.48                              | 754.38                              | 7  |
| 10 | H  | 965.54                              | 683.35                              | 6  |
| 11 | T  | 1066.59                             | 546.29                              | 5  |
| 12 | S  | 1153.62                             | 445.24                              | 4  |
| 13 | N  | 1267.66                             | 358.21                              | 3  |
| 14 | P  | 1364.72                             | 244.17                              | 2  |
| 15 | K  | -                                   | 147.11                              | 1  |

gi|157832110|pdb|1NGB|A Chain A, Structural Basis Of The 70-Kilodalton Heat Shock Cognate Protein Atp Hydrolytic Activity, Ii. Structure Of The Active Site With Adp Or Atp Bound To Wild Type And Mutant Atpase Fragment

-.IINQPTAAAIAYGLDK.-  
P(pep)0.000986438

M+H=1658.911255  
Xcorr=2.73E+00

DeltaM=1.21196  
DCn=0.50

Z=

#4333-4333 NL: 6.84E1

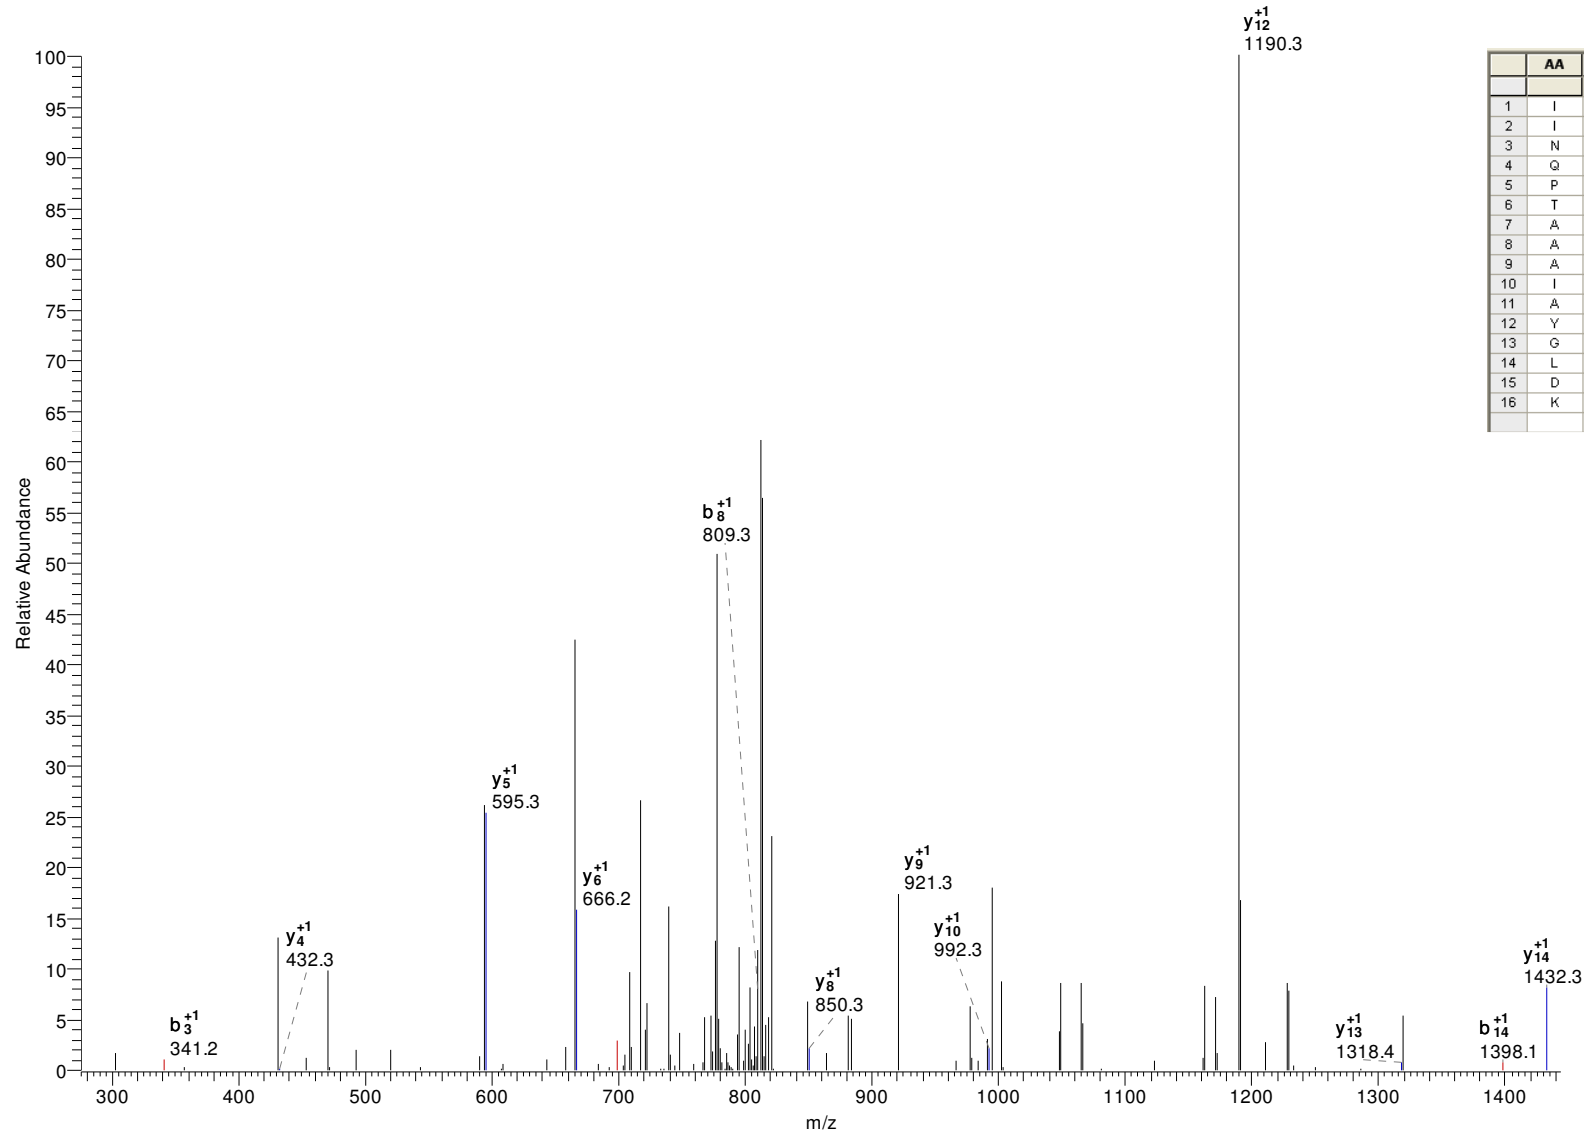

|    | AA | B       | Y       |    |
|----|----|---------|---------|----|
|    |    | ✓       | ✓       |    |
| 1  | I  | 114.09  | -       | 16 |
| 2  | I  | 227.18  | 1545.83 | 15 |
| 3  | N  | 341.22  | 1432.74 | 14 |
| 4  | Q  | 469.28  | 1318.70 | 13 |
| 5  | P  | 566.33  | 1190.64 | 12 |
| 6  | T  | 667.38  | 1093.59 | 11 |
| 7  | A  | 738.41  | 992.54  | 10 |
| 8  | A  | 809.45  | 921.50  | 9  |
| 9  | A  | 880.49  | 850.47  | 8  |
| 10 | I  | 993.57  | 779.43  | 7  |
| 11 | A  | 1064.61 | 666.35  | 6  |
| 12 | Y  | 1227.67 | 595.31  | 5  |
| 13 | G  | 1284.69 | 432.25  | 4  |
| 14 | L  | 1397.78 | 375.22  | 3  |
| 15 | D  | 1512.81 | 262.14  | 2  |
| 16 | K  | -       | 147.11  | 1  |

gi|70881727|gb|EAN94737.1| hypothetical protein, conserved [Trypanosoma cruzi]

-.M\*QQVEHEM\*KK.-

M+H=1319.608233

DeltaM=1.96359

z=2

P(pep)=0.000586814

Xcorr=2.55

DCn=0.45

#3061-3061 NL: 1.05E3

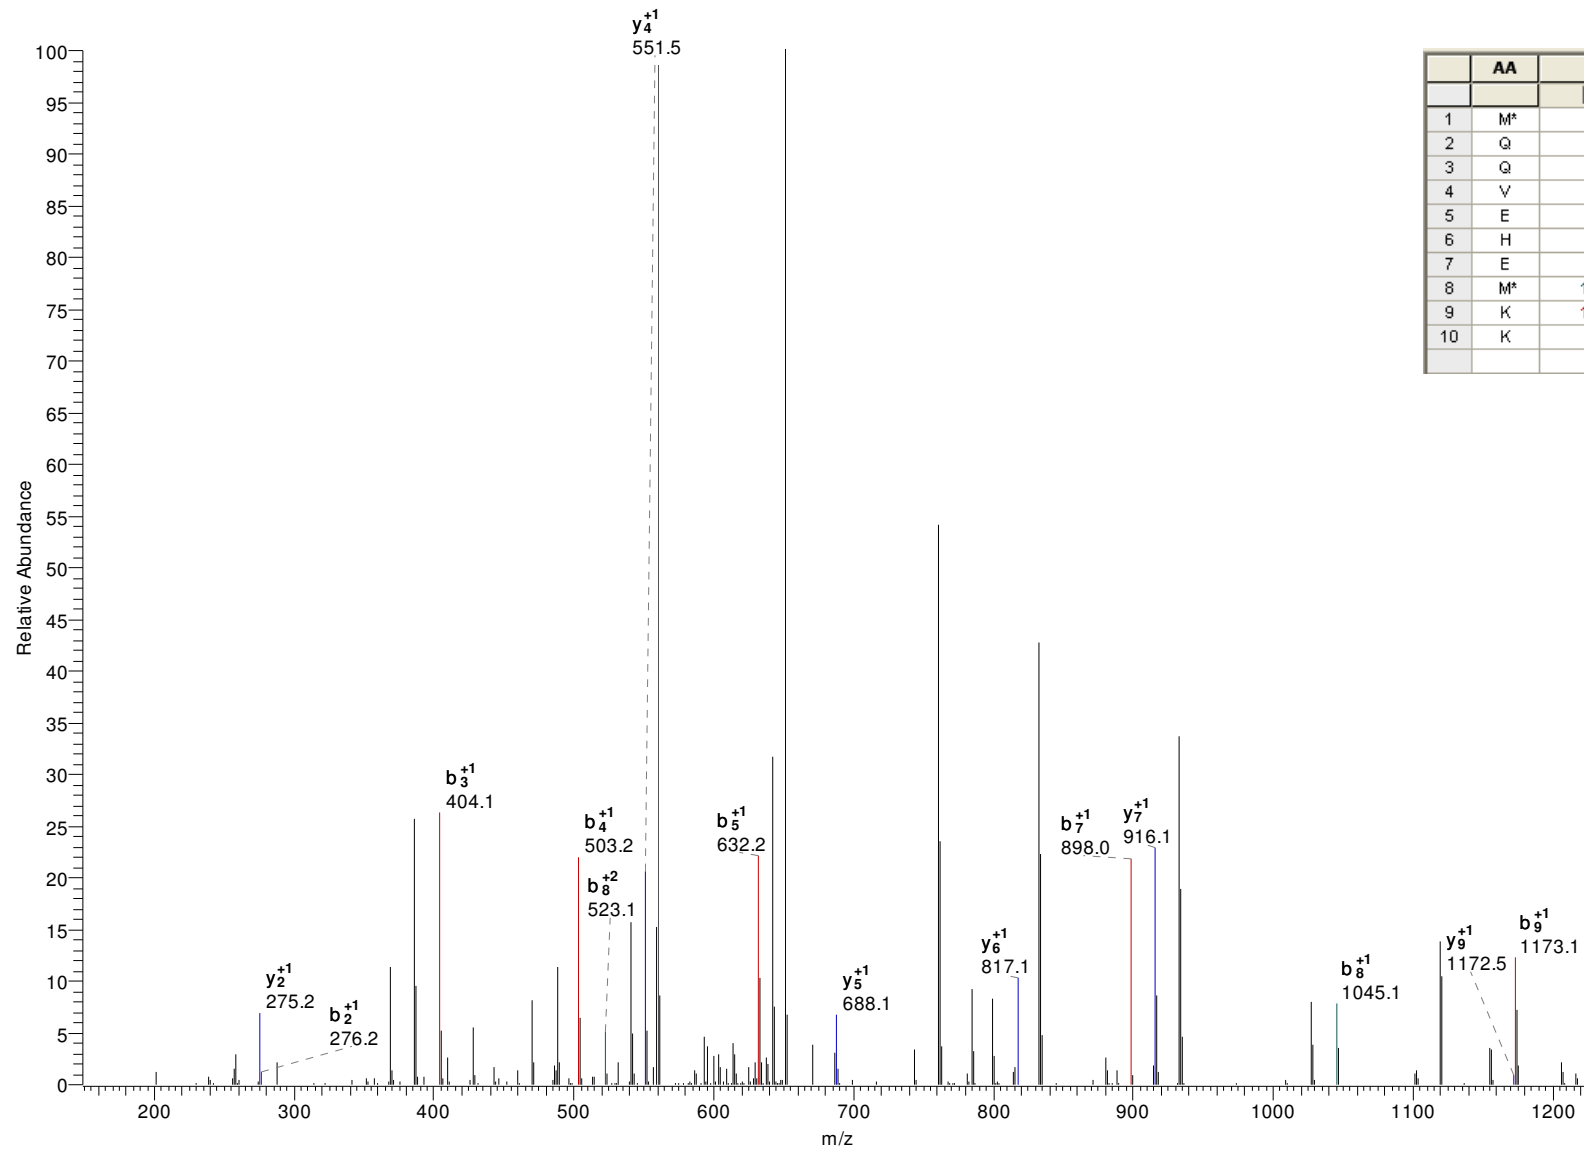

|    | AA | B       | Y       |    |
|----|----|---------|---------|----|
|    |    | ✓       | ✓       |    |
| 1  | M* | 148.04  | -       | 10 |
| 2  | Q  | 276.10  | 1172.57 | 9  |
| 3  | Q  | 404.16  | 1044.51 | 8  |
| 4  | V  | 503.23  | 916.46  | 7  |
| 5  | E  | 632.27  | 817.39  | 6  |
| 6  | H  | 769.33  | 688.34  | 5  |
| 7  | E  | 898.37  | 551.29  | 4  |
| 8  | M* | 1045.41 | 422.24  | 3  |
| 9  | K  | 1173.50 | 275.21  | 2  |
| 10 | K  | -       | 147.11  | 1  |
