# Supplementary material
Source: PubMed Central journal article supplement (PMC2752740)
Supplement: NIHMS110683-supplement-Suppl__Fig__2.pdf [file NIHMS110683-supplement-Suppl__Fig__2.pdf]

gi|129279126|gb|ABO28970.1| *trans*-sialidase-like protein [*Trypanosoma cruzi*] K.AHTVLDTTDGTNR.V

M+H=1400.676392

DeltaM=1.44109

z=2

P(pep)=2.68E-08

Xcorr=3.93

DCn=0.53

#2167-2167 NL: 2.37E3

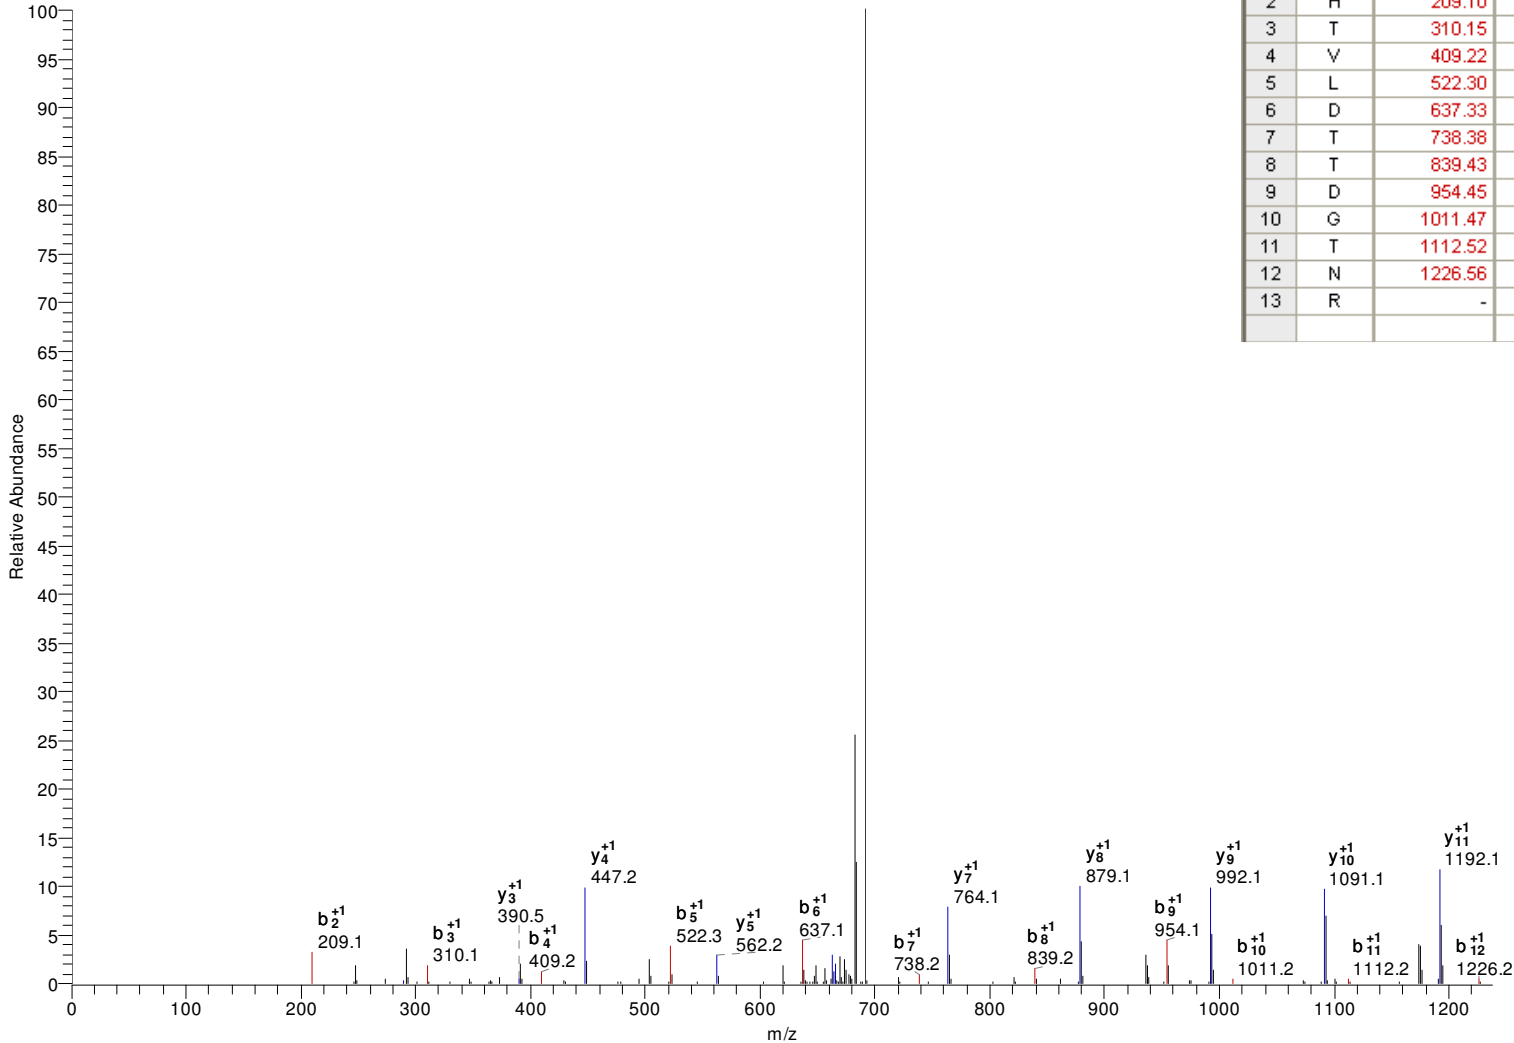

|    | AA | B       | Y       |    |
|----|----|---------|---------|----|
|    |    | ✓       | ✓       |    |
| 1  | A  | 72.04   | -       | 13 |
| 2  | H  | 209.10  | 1329.64 | 12 |
| 3  | T  | 310.15  | 1192.58 | 11 |
| 4  | V  | 409.22  | 1091.53 | 10 |
| 5  | L  | 522.30  | 992.46  | 9  |
| 6  | D  | 637.33  | 879.38  | 8  |
| 7  | T  | 738.38  | 764.35  | 7  |
| 8  | T  | 839.43  | 663.31  | 6  |
| 9  | D  | 954.45  | 562.26  | 5  |
| 10 | G  | 1011.47 | 447.23  | 4  |
| 11 | T  | 1112.52 | 390.21  | 3  |
| 12 | N  | 1226.56 | 289.16  | 2  |
| 13 | R  | -       | 175.12  | 1  |

gi|70884356|gb|EAN97220.1| cytochrome b5, putative [*Trypanosoma cruzi*]

K.YYIGELDPNDAEK.L  
Xcorr=2.65

M+H=1526.700928  
DCn=0.35

DeltaM=1.32585

z=2

P(pep)=6.81E-05

#3808-3808 NL: 4.91E1

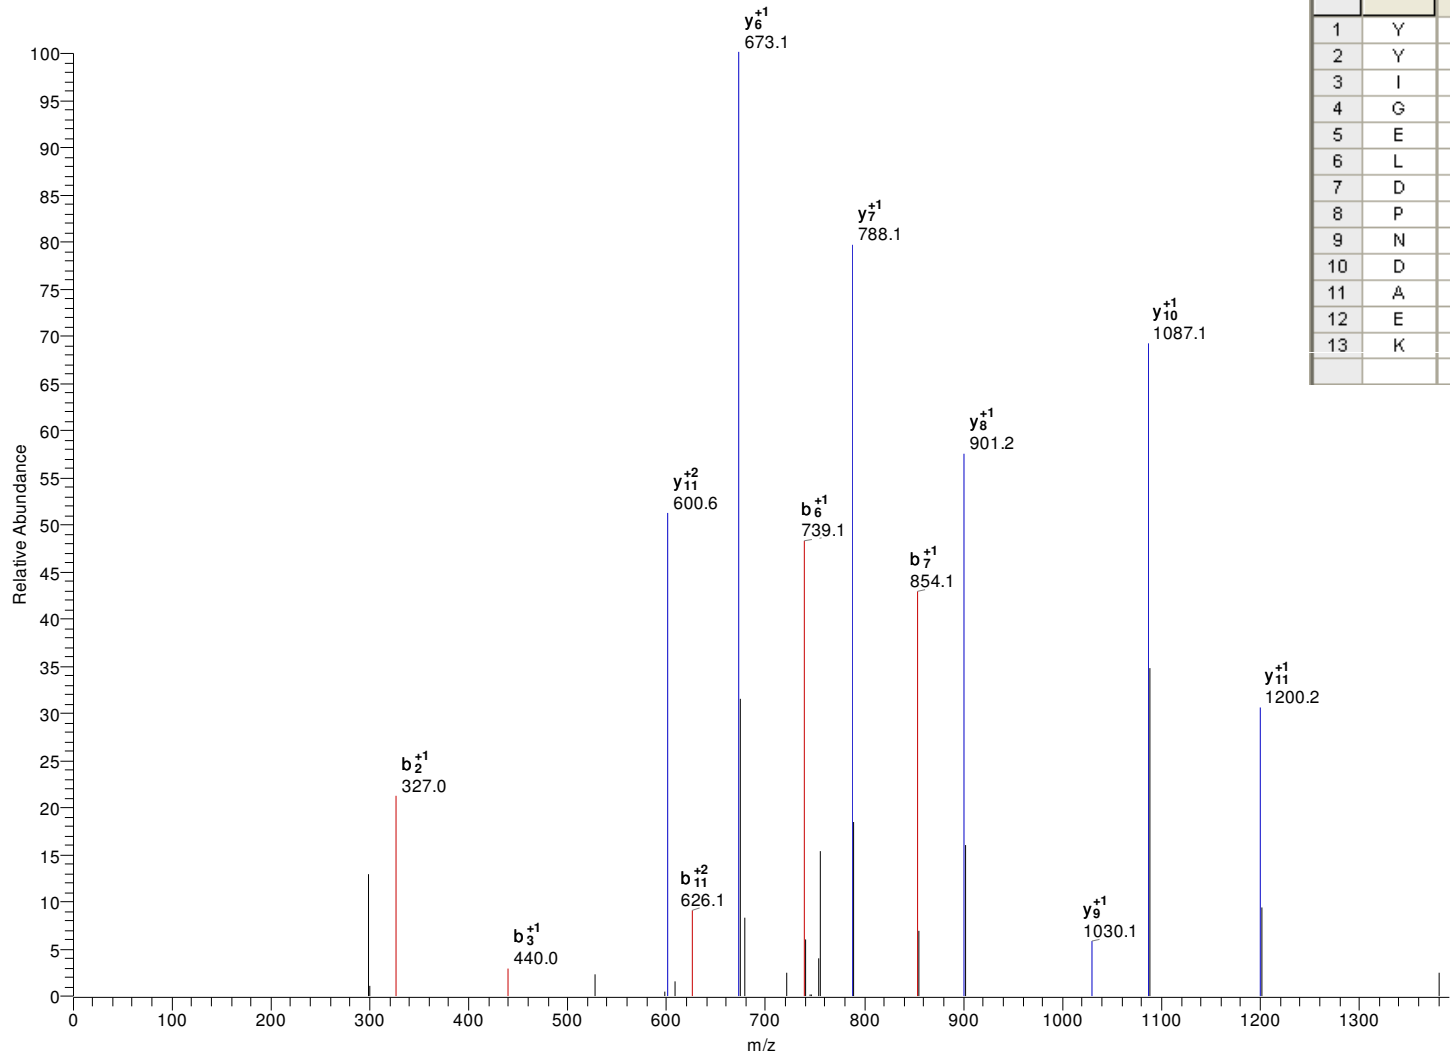

|    | AA | B                                   | Y                                   |    |
|----|----|-------------------------------------|-------------------------------------|----|
|    |    | <input checked="" type="checkbox"/> | <input checked="" type="checkbox"/> |    |
| 1  | Y  | 164.07                              | -                                   | 13 |
| 2  | Y  | 327.13                              | 1363.64                             | 12 |
| 3  | I  | 440.22                              | 1200.57                             | 11 |
| 4  | G  | 497.24                              | 1087.49                             | 10 |
| 5  | E  | 626.28                              | 1030.47                             | 9  |
| 6  | L  | 739.37                              | 901.43                              | 8  |
| 7  | D  | 854.39                              | 788.34                              | 7  |
| 8  | P  | 951.45                              | 673.32                              | 6  |
| 9  | N  | 1065.49                             | 576.26                              | 5  |
| 10 | D  | 1180.52                             | 462.22                              | 4  |
| 11 | A  | 1251.55                             | 347.19                              | 3  |
| 12 | E  | 1380.60                             | 276.16                              | 2  |
| 13 | K  | -                                   | 147.11                              | 1  |

gi|70879199|gb|EAN92392.1| hypothetical protein, conserved [*Trypanosoma cruzi*]

K.GAPQTSSSGGSTTATTAGNAGPK.D

M+H=2106.989746

DeltaM=1.60503

z=2

P(pep)=2.22E-15

Xcorr=6.47

DCn=0.61

#2164-2164 NL: 7.79E2

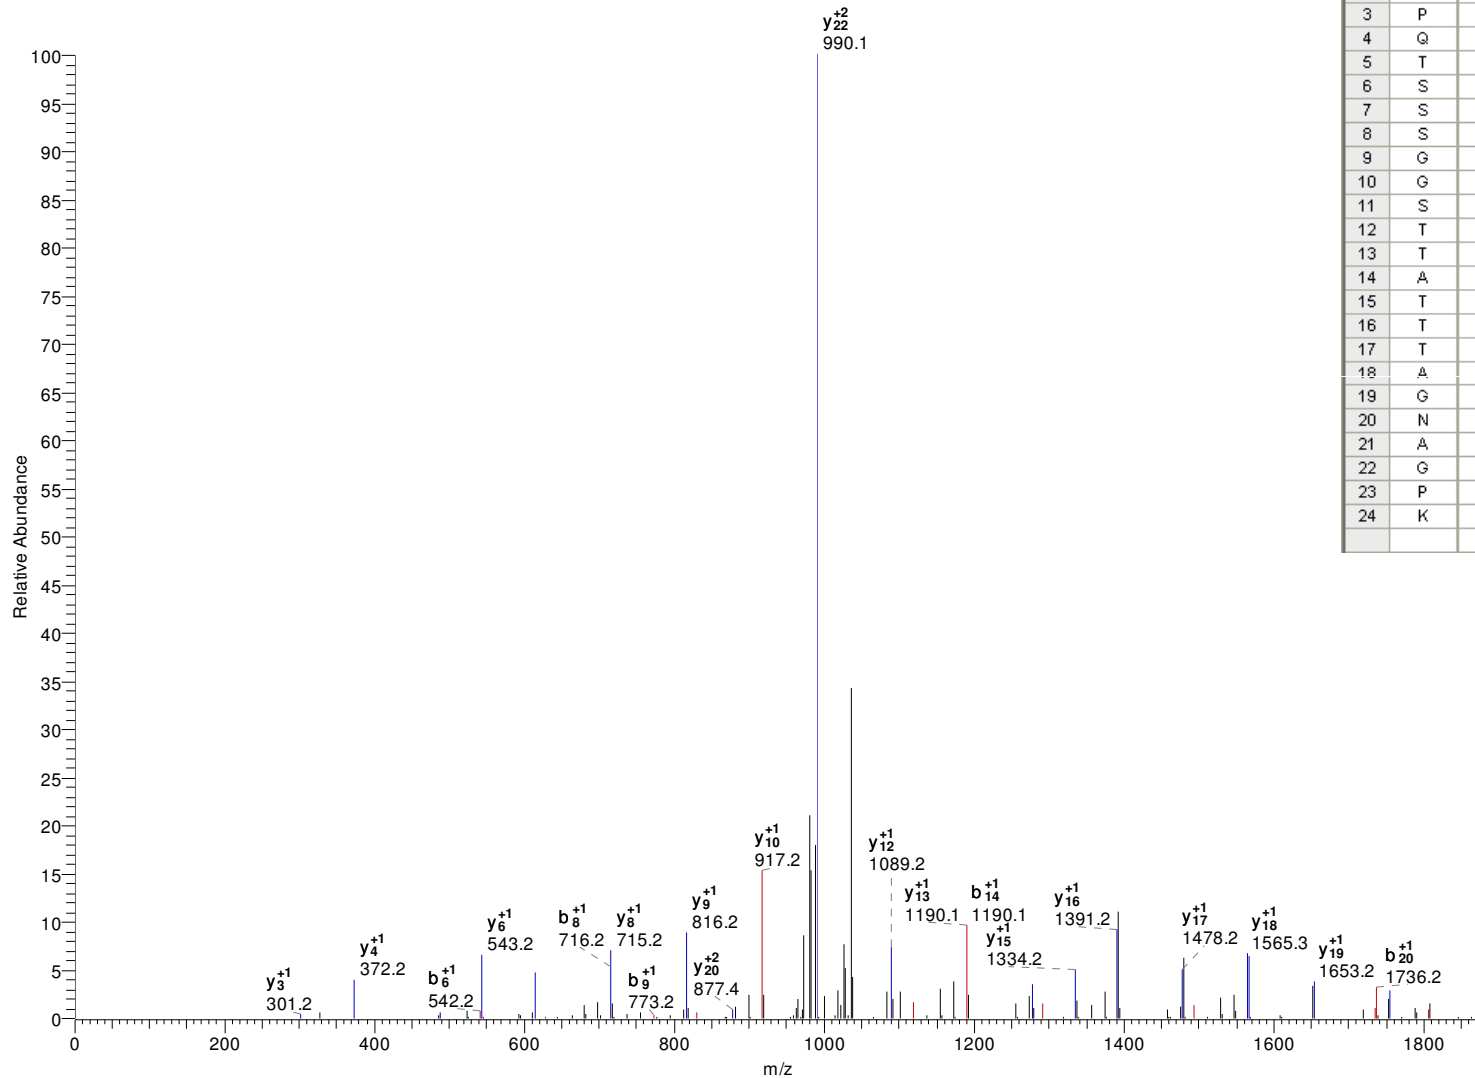

|    | AA | B       | Y       |    |
|----|----|---------|---------|----|
|    |    | ✓       | ✓       |    |
| 1  | G  | 58.03   | -       | 24 |
| 2  | A  | 129.07  | 2049.97 | 23 |
| 3  | P  | 226.12  | 1978.93 | 22 |
| 4  | Q  | 354.18  | 1881.88 | 21 |
| 5  | T  | 455.22  | 1753.82 | 20 |
| 6  | S  | 542.26  | 1652.77 | 19 |
| 7  | S  | 629.29  | 1565.74 | 18 |
| 8  | S  | 716.32  | 1478.71 | 17 |
| 9  | G  | 773.34  | 1391.68 | 16 |
| 10 | G  | 830.36  | 1334.65 | 15 |
| 11 | S  | 917.40  | 1277.63 | 14 |
| 12 | T  | 1018.44 | 1190.60 | 13 |
| 13 | T  | 1119.49 | 1089.55 | 12 |
| 14 | A  | 1190.53 | 988.51  | 11 |
| 15 | T  | 1291.58 | 917.47  | 10 |
| 16 | T  | 1392.62 | 816.42  | 9  |
| 17 | T  | 1493.67 | 715.37  | 8  |
| 18 | A  | 1564.71 | 614.33  | 7  |
| 19 | G  | 1621.73 | 543.29  | 6  |
| 20 | N  | 1735.77 | 486.27  | 5  |
| 21 | A  | 1806.81 | 372.22  | 4  |
| 22 | G  | 1863.83 | 301.19  | 3  |
| 23 | P  | 1960.88 | 244.17  | 2  |
| 24 | K  | -       | 147.11  | 1  |

gi|1658195|gb|AAB18265.1| surface protein-1 [*Trypanosoma cruzi*]

K.APSESTPLLGAGLGDNDGTK.F

M+H=1899.929443

DeltaM=1.79277

z=2

P(pep)=5.00E-10

Xcorr=5.24

DCn=0.64

#3958-3958 NL: 2.67E2

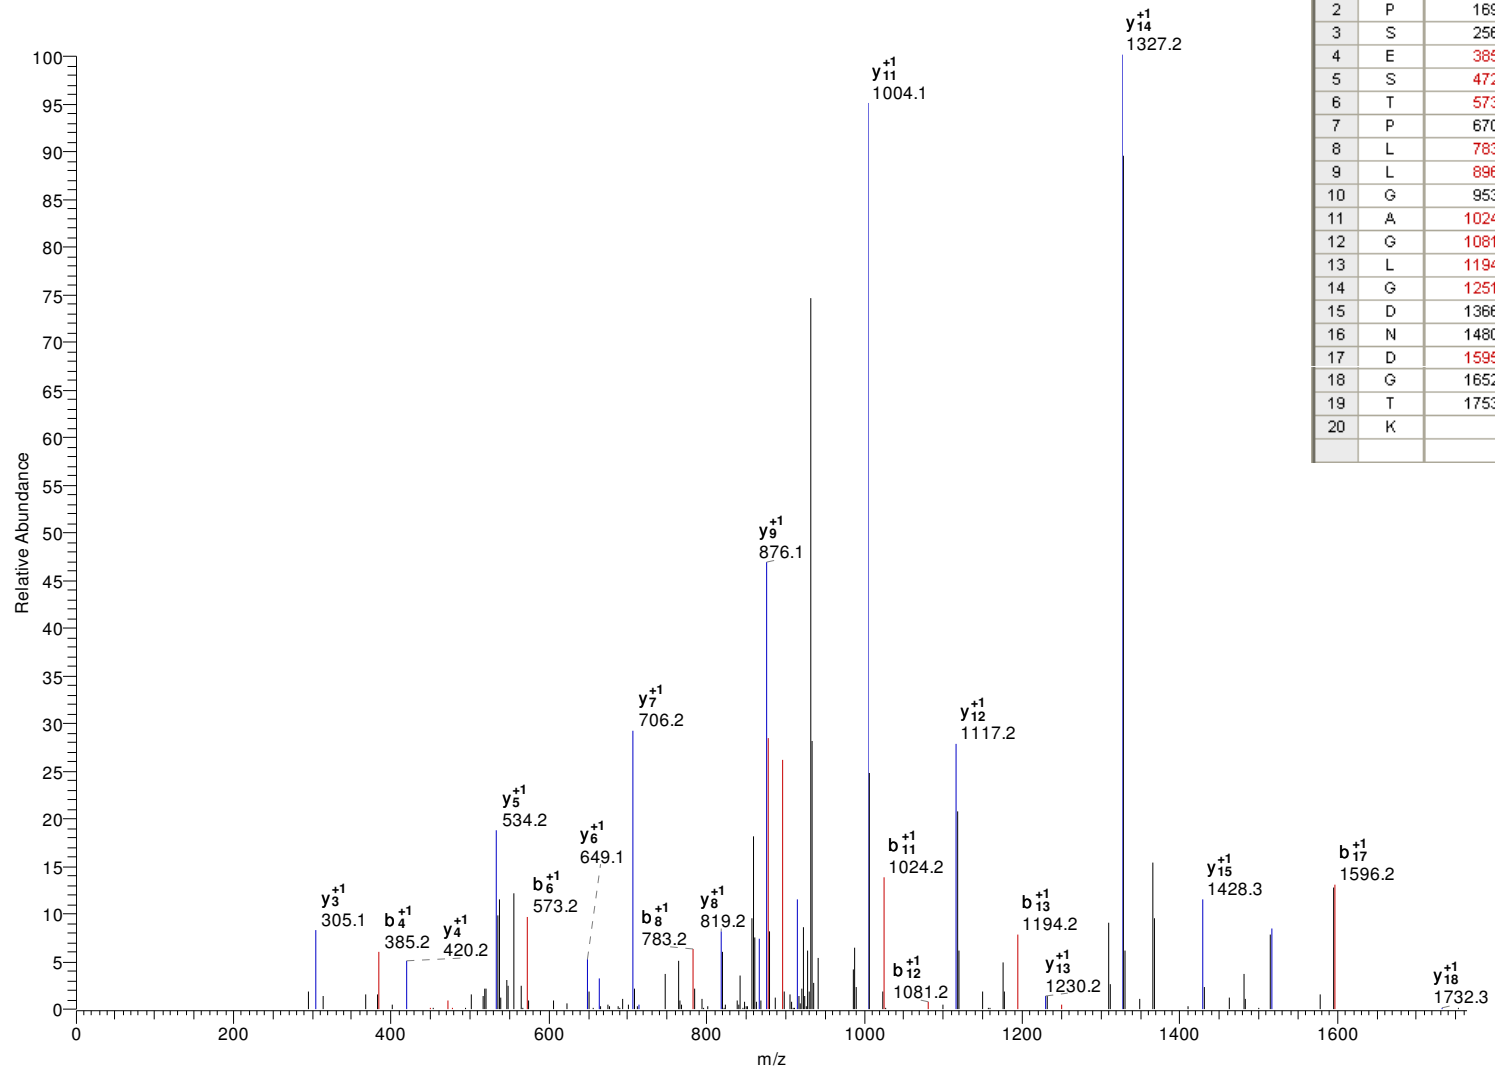

|    | AA | B                                   | Y                                   |    |
|----|----|-------------------------------------|-------------------------------------|----|
|    |    | <input checked="" type="checkbox"/> | <input checked="" type="checkbox"/> |    |
| 1  | A  | 72.04                               | -                                   | 20 |
| 2  | P  | 169.10                              | 1828.89                             | 19 |
| 3  | S  | 256.13                              | 1731.84                             | 18 |
| 4  | E  | 385.17                              | 1644.81                             | 17 |
| 5  | S  | 472.20                              | 1515.76                             | 16 |
| 6  | T  | 573.25                              | 1428.73                             | 15 |
| 7  | P  | 670.30                              | 1327.69                             | 14 |
| 8  | L  | 783.39                              | 1230.63                             | 13 |
| 9  | L  | 896.47                              | 1117.55                             | 12 |
| 10 | G  | 953.49                              | 1004.46                             | 11 |
| 11 | A  | 1024.53                             | 947.44                              | 10 |
| 12 | G  | 1081.55                             | 876.41                              | 9  |
| 13 | L  | 1194.64                             | 819.38                              | 8  |
| 14 | G  | 1251.66                             | 706.30                              | 7  |
| 15 | D  | 1366.68                             | 649.28                              | 6  |
| 16 | N  | 1480.73                             | 534.25                              | 5  |
| 17 | D  | 1595.75                             | 420.21                              | 4  |
| 18 | G  | 1652.78                             | 305.18                              | 3  |
| 19 | T  | 1753.82                             | 248.16                              | 2  |
| 20 | K  | -                                   | 147.11                              | 1  |

gi|70886265|gb|EAN99051.1| hypothetical protein, conserved [*Trypanosoma cruzi*]  
K.VAQCFVEIAGGSSK.N M+H=1452.71521 DCn=1.46745

z=2

P(pep)=7.74E-10

Xcorr=4.84

DCn=0.58

#3491-3491 NL: 1.94E2

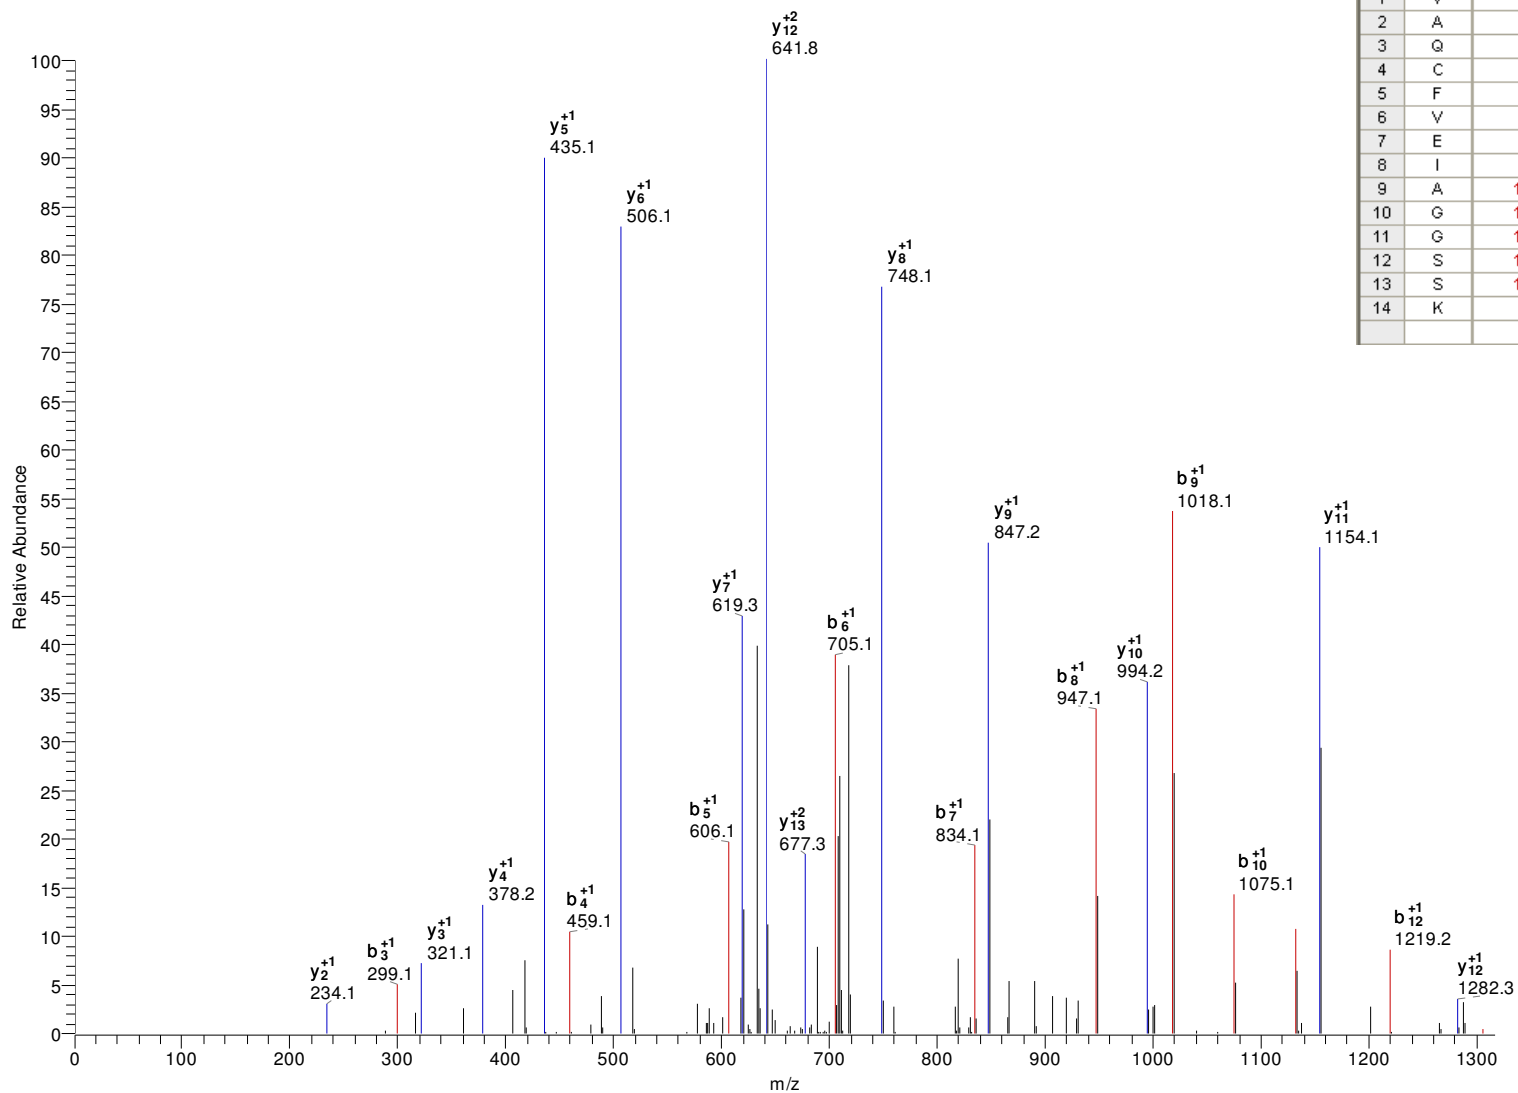

|    | AA | B                                   | Y                                   |    |
|----|----|-------------------------------------|-------------------------------------|----|
|    |    | <input checked="" type="checkbox"/> | <input checked="" type="checkbox"/> |    |
| 1  | V  | 100.08                              | -                                   | 14 |
| 2  | A  | 171.11                              | 1353.65                             | 13 |
| 3  | Q  | 299.17                              | 1282.61                             | 12 |
| 4  | C  | 459.20                              | 1154.55                             | 11 |
| 5  | F  | 606.27                              | 994.52                              | 10 |
| 6  | V  | 705.34                              | 847.45                              | 9  |
| 7  | E  | 834.38                              | 748.38                              | 8  |
| 8  | I  | 947.47                              | 619.34                              | 7  |
| 9  | A  | 1018.50                             | 506.26                              | 6  |
| 10 | G  | 1075.52                             | 435.22                              | 5  |
| 11 | G  | 1132.55                             | 378.20                              | 4  |
| 12 | S  | 1219.58                             | 321.18                              | 3  |
| 13 | S  | 1306.61                             | 234.14                              | 2  |
| 14 | K  | -                                   | 147.11                              | 1  |

gi|70883049|gb|EAN95983.1| ATPase beta subunit, putative [*Trypanosoma cruzi*]

R.FTQANSEVSALLGR.I

M+H=1492.775391

DCn=-0.13655

z=2

P(pep)=5.00E-09

Xcorr=4.69

DCn=0.60

#4979-4979 NL: 6.72E1

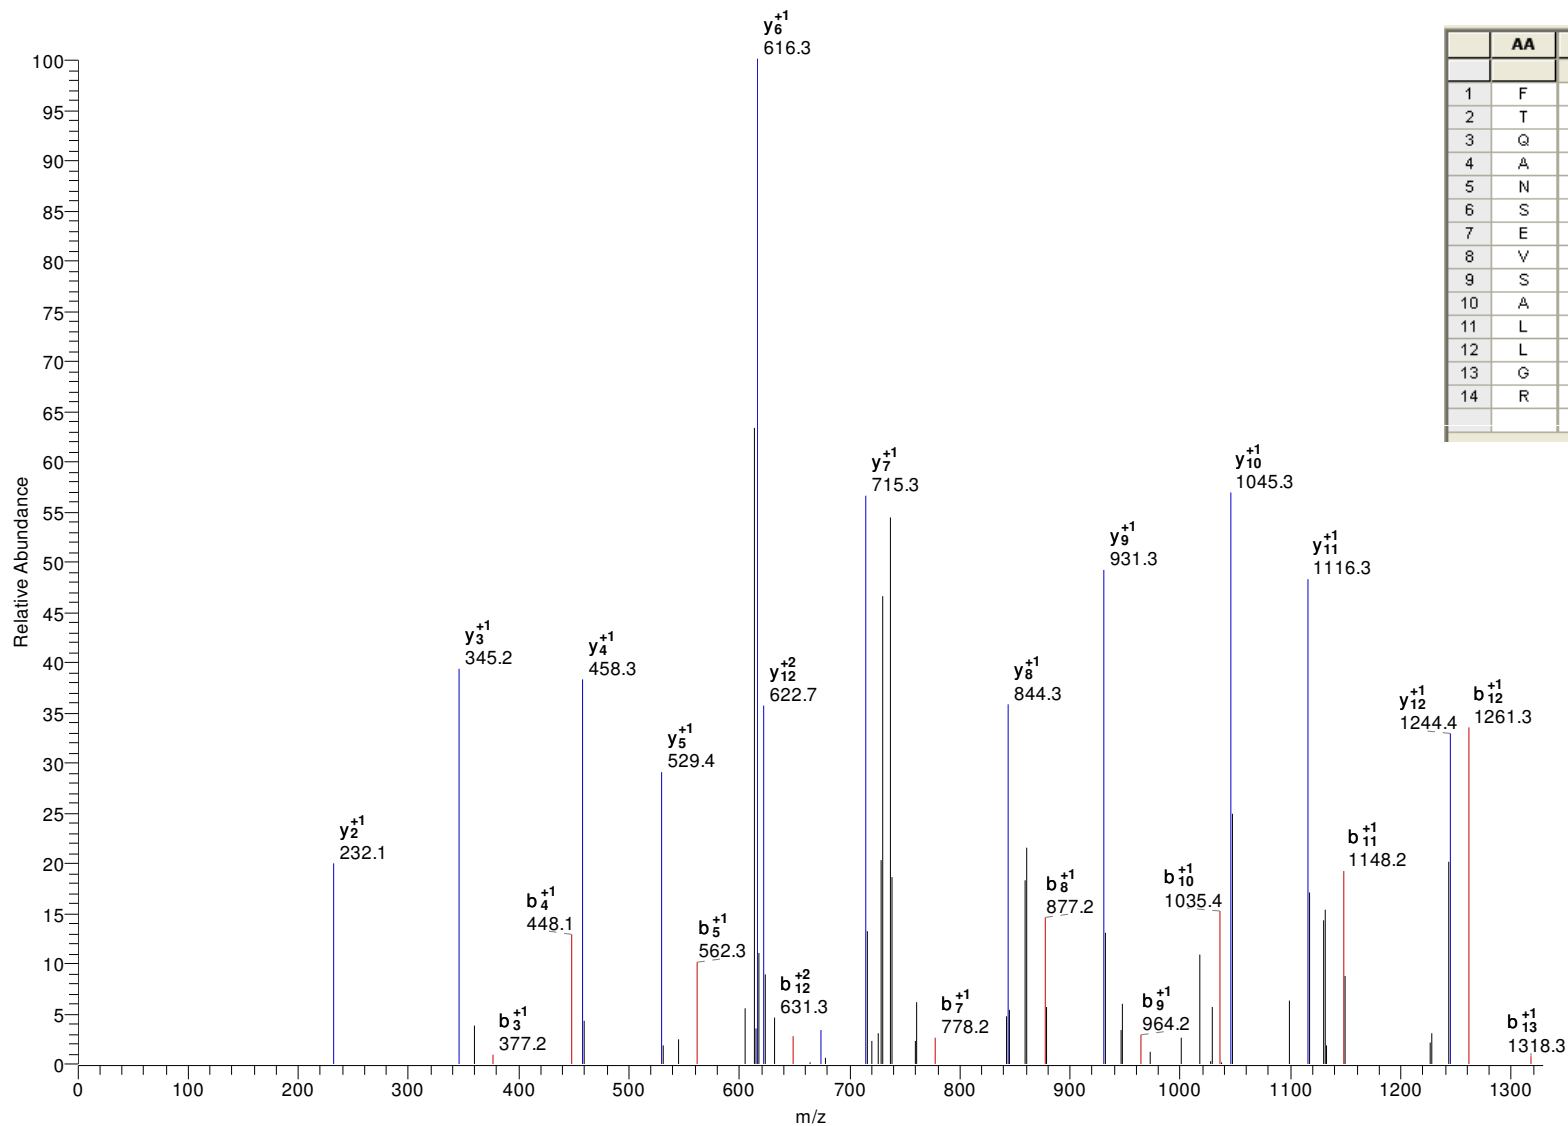

|    | AA | B       | Y       |    |
|----|----|---------|---------|----|
|    |    | ✓       | ✓       |    |
| 1  | F  | 148.08  | -       | 14 |
| 2  | T  | 249.12  | 1345.71 | 13 |
| 3  | Q  | 377.18  | 1244.66 | 12 |
| 4  | A  | 448.22  | 1116.60 | 11 |
| 5  | N  | 562.26  | 1045.56 | 10 |
| 6  | S  | 649.29  | 931.52  | 9  |
| 7  | E  | 778.34  | 844.49  | 8  |
| 8  | V  | 877.41  | 715.45  | 7  |
| 9  | S  | 964.44  | 616.38  | 6  |
| 10 | A  | 1035.47 | 529.35  | 5  |
| 11 | L  | 1148.56 | 458.31  | 4  |
| 12 | L  | 1261.64 | 345.22  | 3  |
| 13 | G  | 1318.66 | 232.14  | 2  |
| 14 | R  | -       | 175.12  | 1  |

gi|70881822|gb|EAN94827.1| protein tyrosine phosphatase, putative [*Trypanosoma cruzi*]

R.VCGLTYDATQLEK.N

M+H=1497.725464

DCn=0.92375

z=2

P(pep)=3.11E-06

Xcorr=4.11

DCn=0.50

#3631-3631 NL: 1.57E2

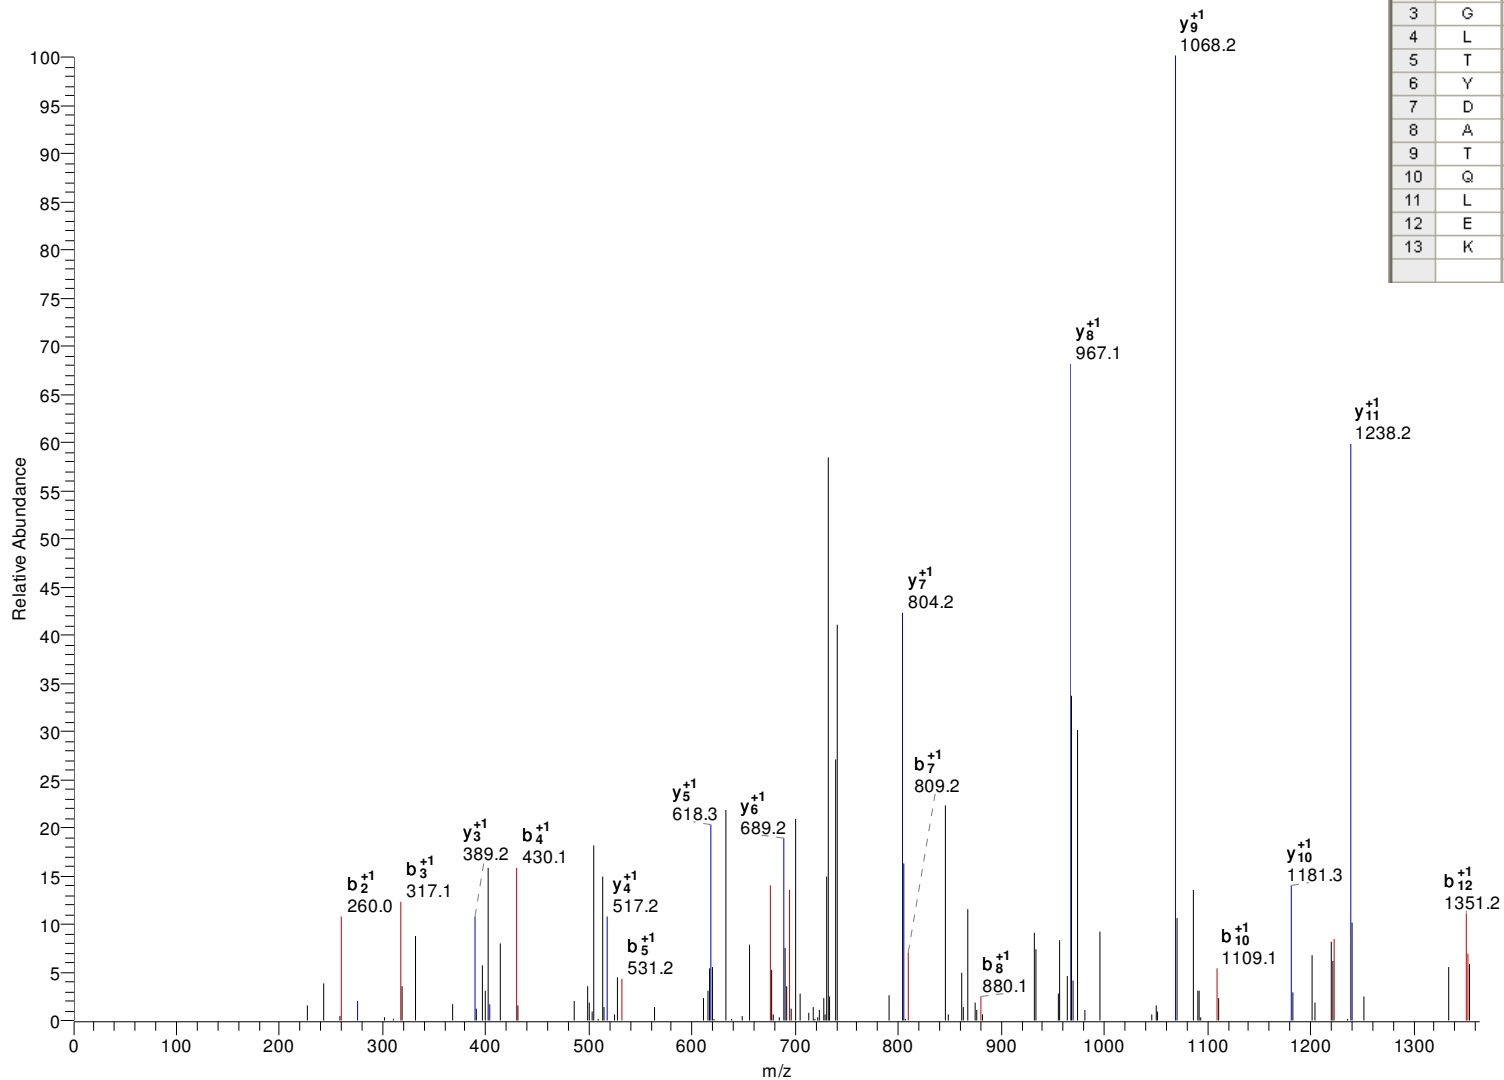

|    | AA | B       | Y       |    |
|----|----|---------|---------|----|
|    |    | ☑       | ☑       |    |
| 1  | V  | 100.08  | -       | 13 |
| 2  | C  | 260.11  | 1398.66 | 12 |
| 3  | G  | 317.13  | 1238.63 | 11 |
| 4  | L  | 430.21  | 1181.60 | 10 |
| 5  | T  | 531.26  | 1068.52 | 9  |
| 6  | Y  | 694.32  | 967.47  | 8  |
| 7  | D  | 809.35  | 804.41  | 7  |
| 8  | A  | 880.39  | 689.38  | 6  |
| 9  | T  | 981.43  | 618.35  | 5  |
| 10 | Q  | 1109.49 | 517.30  | 4  |
| 11 | L  | 1222.58 | 389.24  | 3  |
| 12 | E  | 1351.62 | 276.16  | 2  |
| 13 | K  | -       | 147.11  | 1  |

gi|70874541|gb|EAN88213.1| hypothetical protein, conserved [*Trypanosoma cruzi*]  
R.SSLADEDENTCDR.V M+H=1511.591553 DeltaM=1.09319 z=2  
P(pep)3.65E-08 Xcorr=3.49 DCn=0.18

#2170-2170 NL: 7.70E1

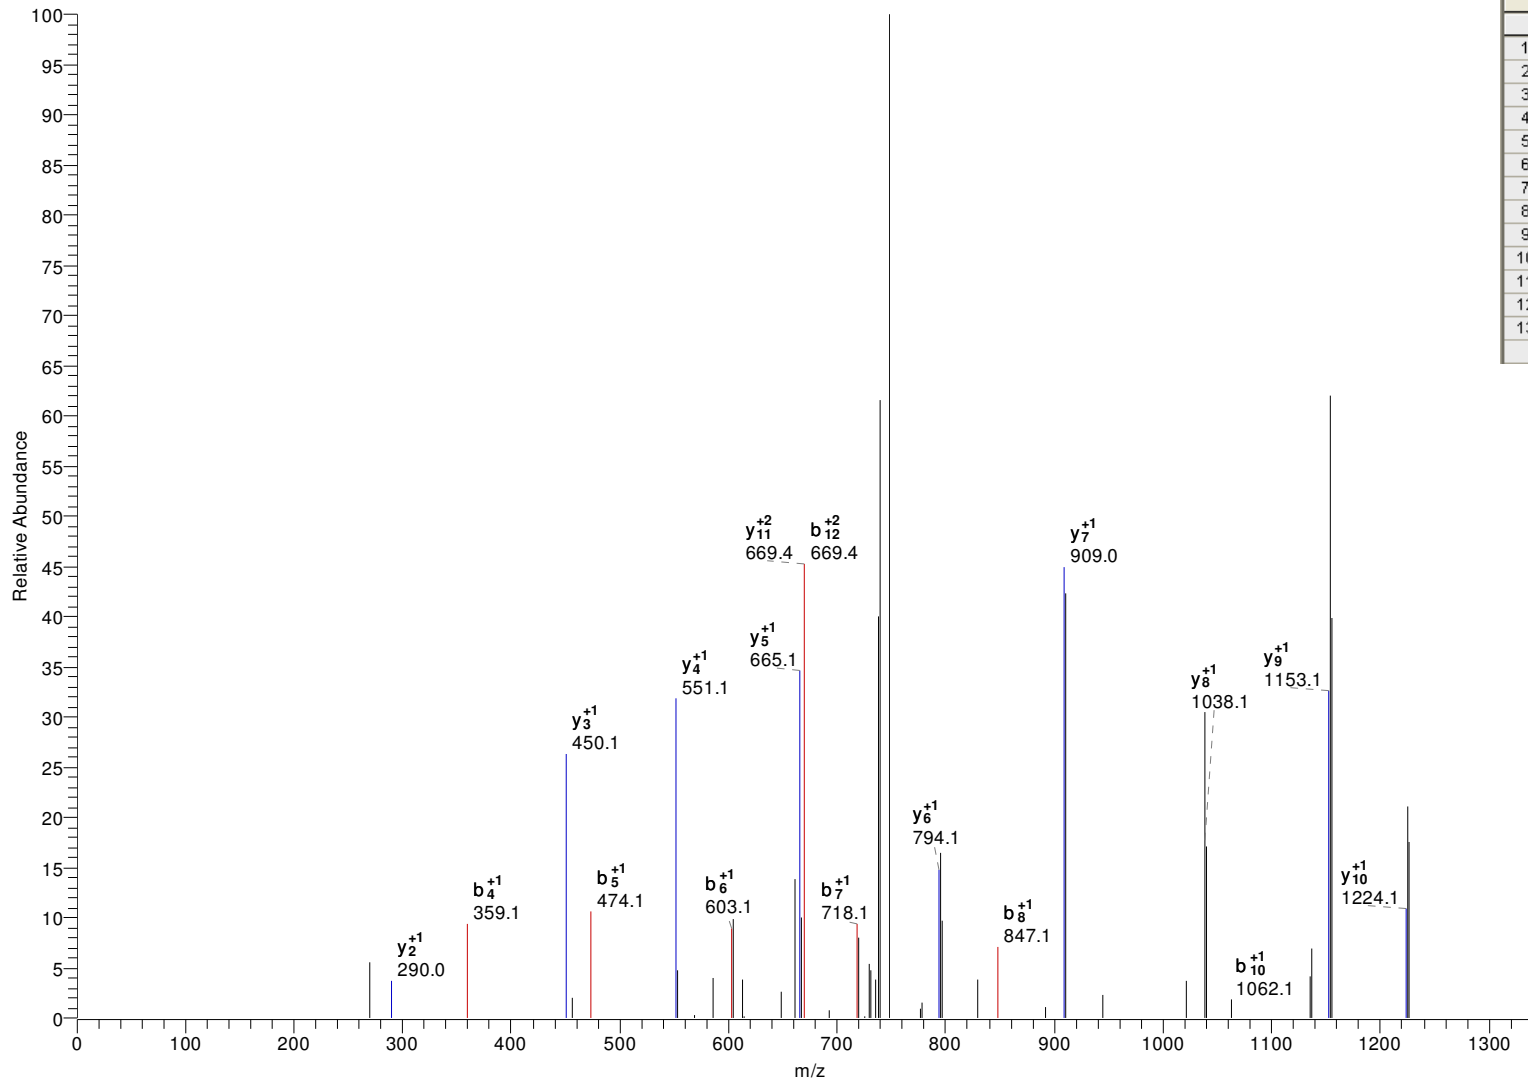

|    | AA | B       | Y       |    |
|----|----|---------|---------|----|
|    |    | ✓       | ✓       |    |
| 1  | S  | 88.04   | -       | 13 |
| 2  | S  | 175.07  | 1424.56 | 12 |
| 3  | L  | 288.16  | 1337.53 | 11 |
| 4  | A  | 359.19  | 1224.44 | 10 |
| 5  | D  | 474.22  | 1153.41 | 9  |
| 6  | E  | 603.26  | 1038.38 | 8  |
| 7  | D  | 718.29  | 909.34  | 7  |
| 8  | E  | 847.33  | 794.31  | 6  |
| 9  | N  | 961.37  | 665.27  | 5  |
| 10 | T  | 1062.42 | 551.22  | 4  |
| 11 | C  | 1222.45 | 450.18  | 3  |
| 12 | D  | 1337.48 | 290.15  | 2  |
| 13 | R  | -       | 175.12  | 1  |



gi|148251368|gb|ABQ53588.1| surface protein-2 [*Trypanosoma cruzi*]

K.GSVYVDGVIVGSPAK.I

M+H=1447.779175

DeltaM=1.35222

z=2

P(pep)=2.42E-4

Xcorr=3.44

DCn=0.45

#3703-3703 NL: 1.40E2

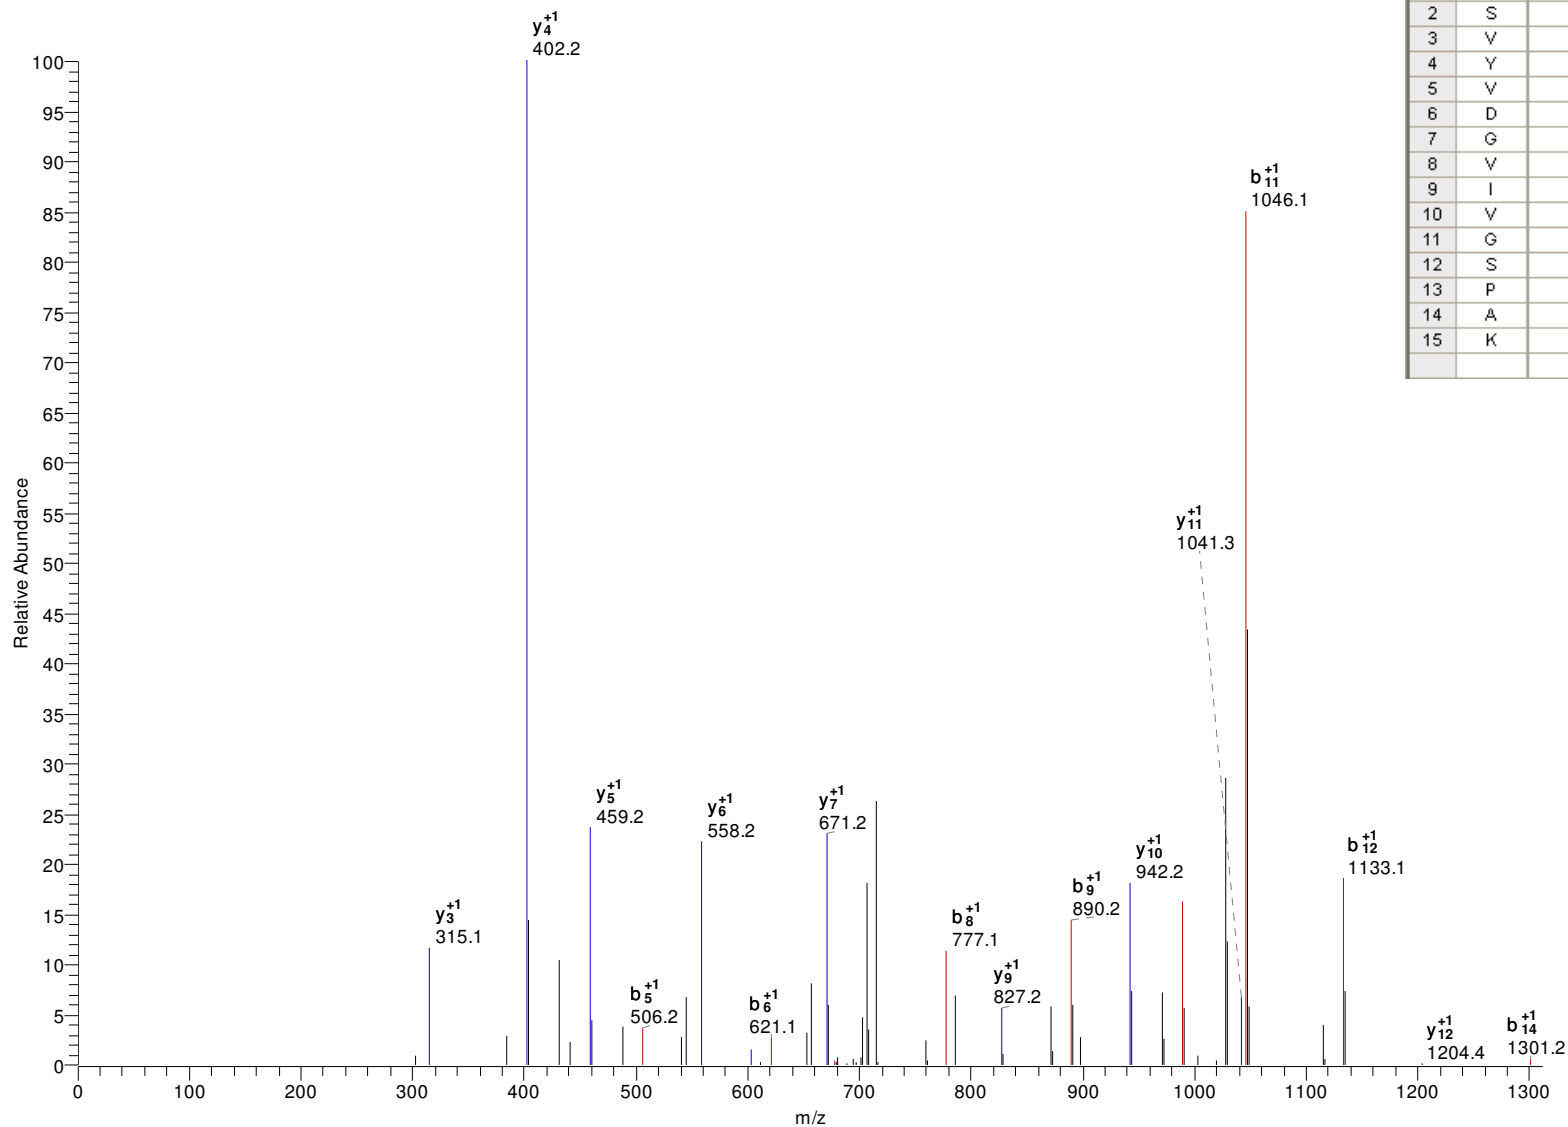

|    | AA | B                                   | Y                                   |    |
|----|----|-------------------------------------|-------------------------------------|----|
|    |    | <input checked="" type="checkbox"/> | <input checked="" type="checkbox"/> |    |
| 1  | G  | 58.03                               | -                                   | 15 |
| 2  | S  | 145.06                              | 1390.76                             | 14 |
| 3  | V  | 244.13                              | 1303.73                             | 13 |
| 4  | Y  | 407.19                              | 1204.66                             | 12 |
| 5  | V  | 506.26                              | 1041.59                             | 11 |
| 6  | D  | 621.29                              | 942.53                              | 10 |
| 7  | G  | 678.31                              | 827.50                              | 9  |
| 8  | V  | 777.38                              | 770.48                              | 8  |
| 9  | I  | 890.46                              | 671.41                              | 7  |
| 10 | V  | 989.53                              | 558.32                              | 6  |
| 11 | G  | 1046.55                             | 459.26                              | 5  |
| 12 | S  | 1133.58                             | 402.23                              | 4  |
| 13 | P  | 1230.64                             | 315.20                              | 3  |
| 14 | A  | 1301.67                             | 218.15                              | 2  |
| 15 | K  | -                                   | 147.11                              | 1  |

gi|70870091|gb|EAN84515.1| calpain-like cysteine peptidase, putative [*Trypanosoma cruzi*]

R.GFDEGNLLFR.I M+H=1224.600708 DeltaM=1.88127 z=2  
P(pep)=8.10E-06 Xcorr=3.41 DCn0.30

#4763-4763 NL: 2.03E2

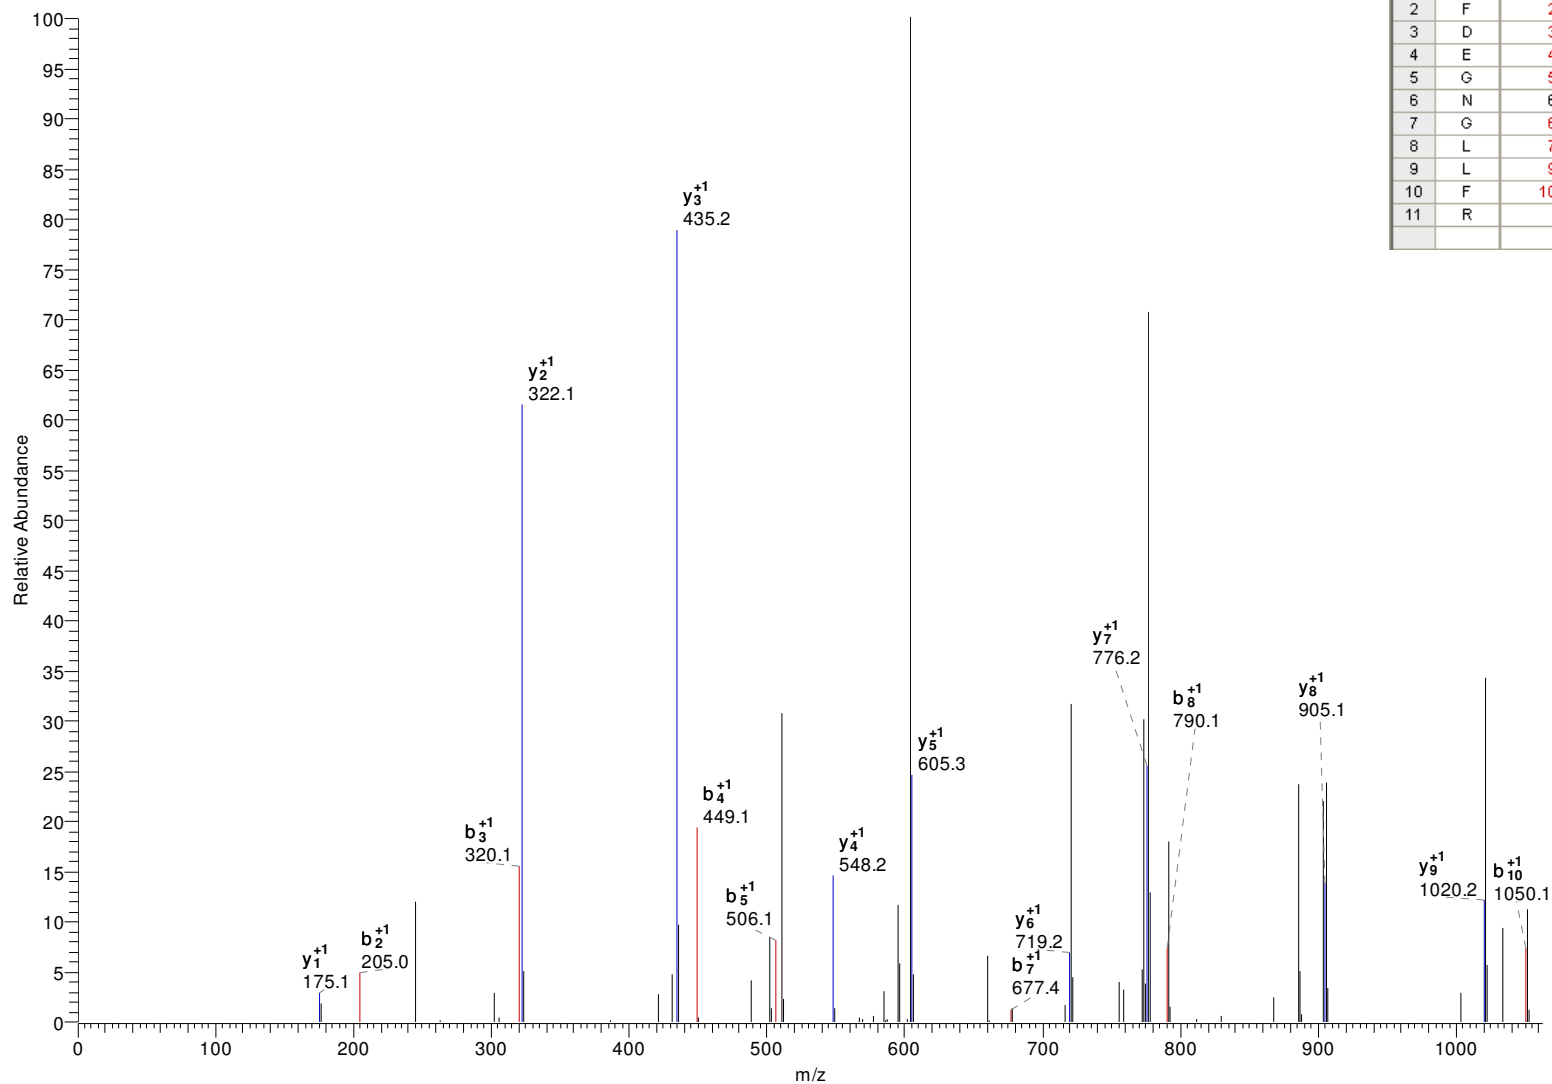

|    | AA | B       | Y       |    |
|----|----|---------|---------|----|
|    |    | ✓       | ✓       |    |
| 1  | G  | 58.03   | -       | 11 |
| 2  | F  | 205.10  | 1167.58 | 10 |
| 3  | D  | 320.12  | 1020.51 | 9  |
| 4  | E  | 449.17  | 905.48  | 8  |
| 5  | G  | 506.19  | 776.44  | 7  |
| 6  | N  | 620.23  | 719.42  | 6  |
| 7  | G  | 677.25  | 605.38  | 5  |
| 8  | L  | 790.34  | 548.36  | 4  |
| 9  | L  | 903.42  | 435.27  | 3  |
| 10 | F  | 1050.49 | 322.19  | 2  |
| 11 | R  | -       | 175.12  | 1  |

gi|21321393|gb|AAM47178.1|AF426134\_1 surface glycoprotein GP90 [*Trypanosoma cruzi*]

K.TTESGTWEPGK.E

M+H=1192.548096

DeltaM=1.52178

z=2

P(pep)=5.48E-07

Xcorr=3.37

DCn=0.49

#2530-2530 NL: 1.68E3

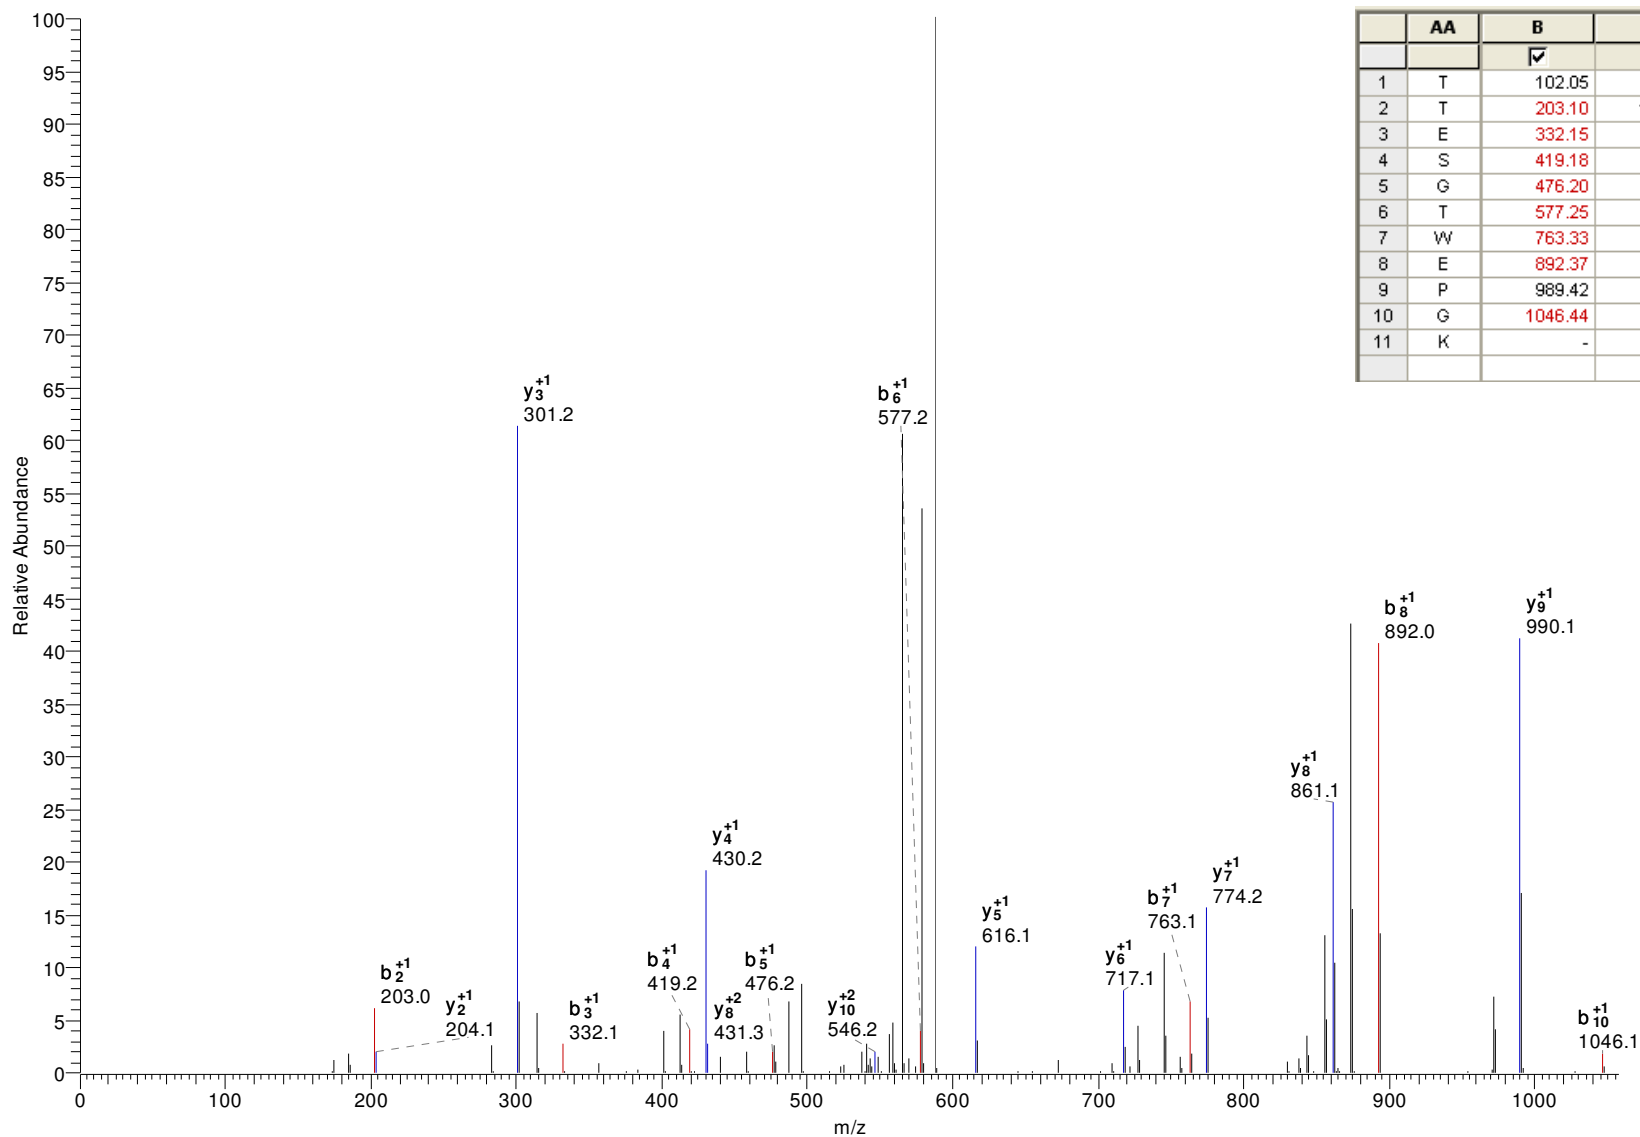

|    | AA | B                                   | Y                                   |    |
|----|----|-------------------------------------|-------------------------------------|----|
|    |    | <input checked="" type="checkbox"/> | <input checked="" type="checkbox"/> |    |
| 1  | T  | 102.05                              | -                                   | 11 |
| 2  | T  | 203.10                              | 1091.50                             | 10 |
| 3  | E  | 332.15                              | 990.45                              | 9  |
| 4  | S  | 419.18                              | 861.41                              | 8  |
| 5  | G  | 476.20                              | 774.38                              | 7  |
| 6  | T  | 577.25                              | 717.36                              | 6  |
| 7  | W  | 763.33                              | 616.31                              | 5  |
| 8  | E  | 892.37                              | 430.23                              | 4  |
| 9  | P  | 989.42                              | 301.19                              | 3  |
| 10 | G  | 1046.44                             | 204.13                              | 2  |
| 11 | K  | -                                   | 147.11                              | 1  |

gi|70871117|gb|EAN85322.1| *trans*-sialidase, putative [*Trypanosoma cruzi*]

R.VDALITATIEGR.K M+H=1258.700195 DeltaM=1.24602 z=2

P(pep)=3.82E-06 Xcorr=3.35 DCn=0.41

#4580-4580 NL: 8.01E1

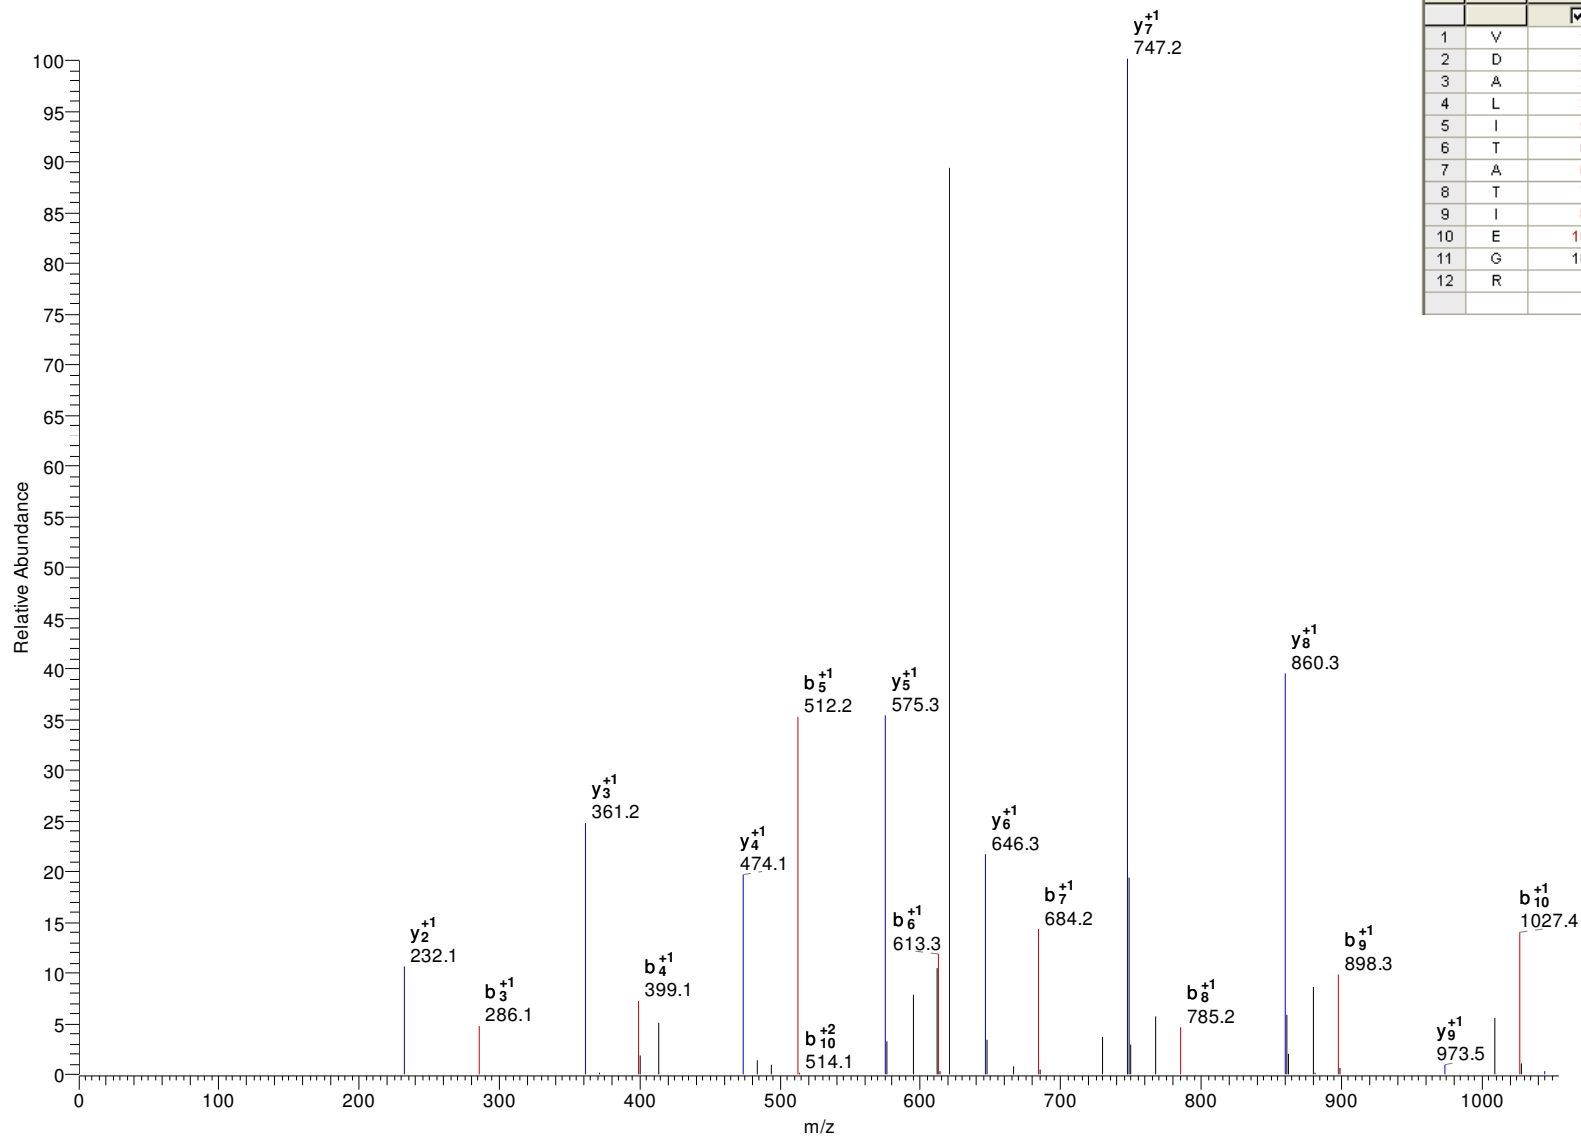

|    | AA | B       | Y       |    |
|----|----|---------|---------|----|
|    |    | ✓       | ✓       |    |
| 1  | V  | 100.08  | -       | 12 |
| 2  | D  | 215.10  | 1159.63 | 11 |
| 3  | A  | 286.14  | 1044.60 | 10 |
| 4  | L  | 399.22  | 973.57  | 9  |
| 5  | I  | 512.31  | 860.48  | 8  |
| 6  | T  | 613.36  | 747.40  | 7  |
| 7  | A  | 684.39  | 646.35  | 6  |
| 8  | T  | 785.44  | 575.31  | 5  |
| 9  | I  | 898.52  | 474.27  | 4  |
| 10 | E  | 1027.57 | 361.18  | 3  |
| 11 | G  | 1084.59 | 232.14  | 2  |
| 12 | R  | -       | 175.12  | 1  |

gi|70881464|gb|EAN94492.1| protein tyrosine phosphatase, putative [*Trypanosoma cruzi*]

R.VCGPTYDASQLEK.D

M+H=1467.678467

DeltaM=1.50029

z=2

P(pep)=2.23E-08

Xcorr=3.20

DCn=0.42

#2894-2894 NL: 7.35E1

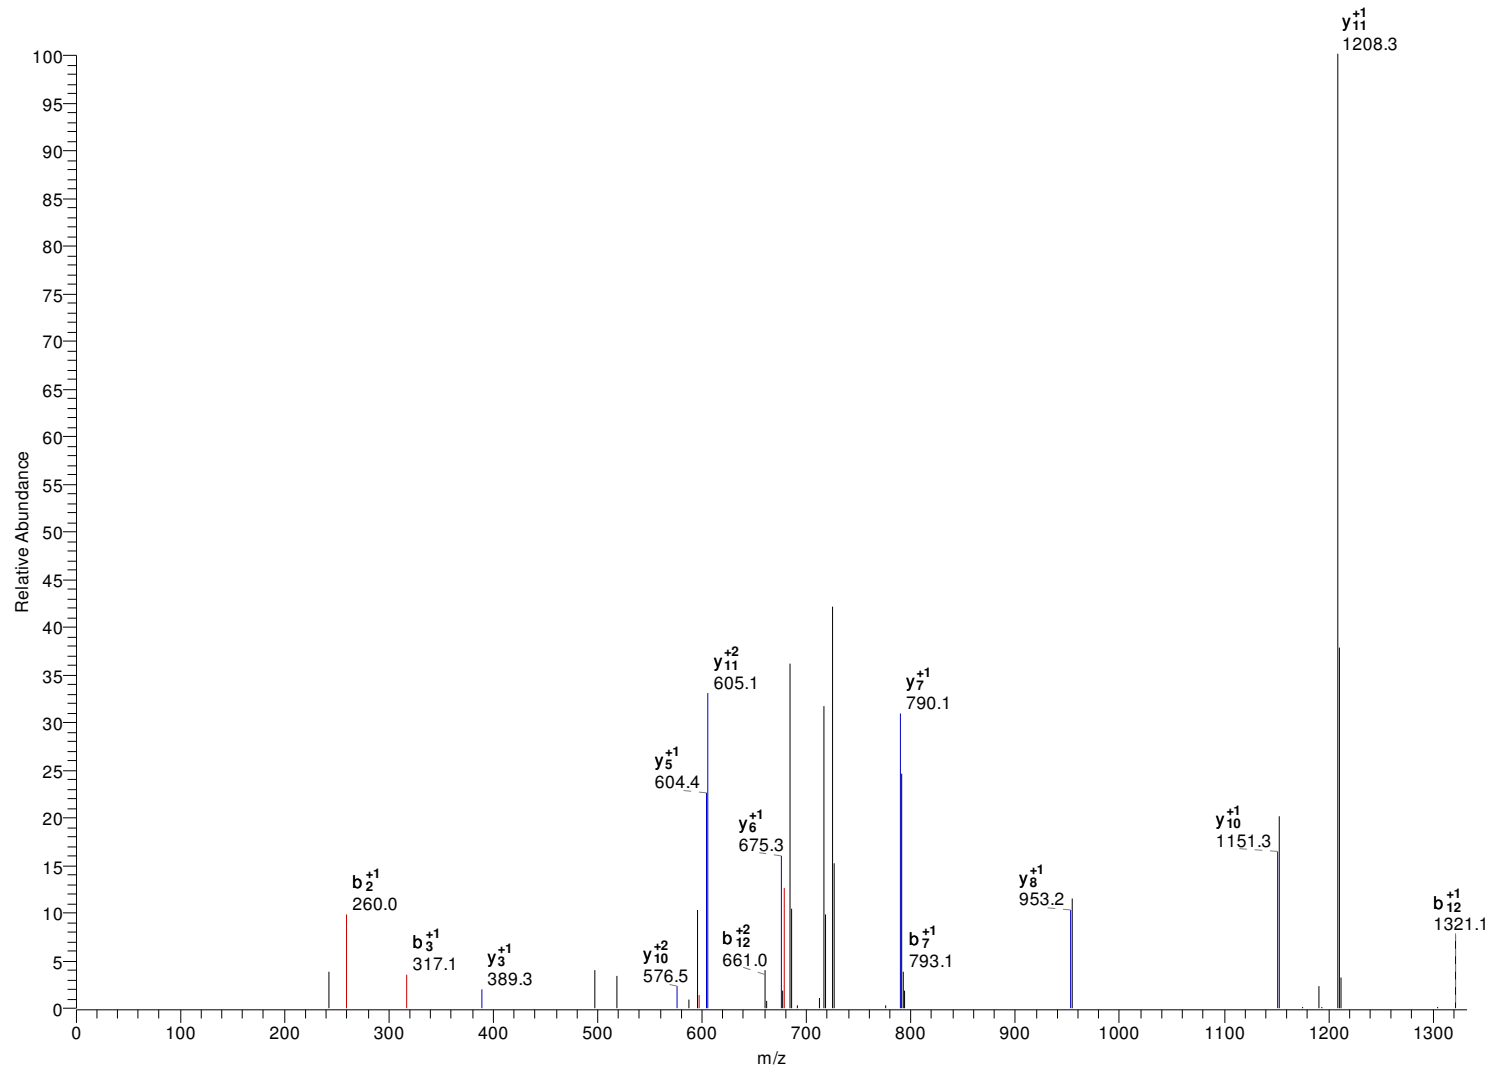

|    | AA | B       | Y       |    |
|----|----|---------|---------|----|
|    |    | ✓       | ✓       |    |
| 1  | V  | 100.08  | -       | 13 |
| 2  | C  | 260.11  | 1368.61 | 12 |
| 3  | G  | 317.13  | 1208.58 | 11 |
| 4  | P  | 414.18  | 1151.56 | 10 |
| 5  | T  | 515.23  | 1054.51 | 9  |
| 6  | Y  | 678.29  | 953.46  | 8  |
| 7  | D  | 793.32  | 790.39  | 7  |
| 8  | A  | 864.36  | 675.37  | 6  |
| 9  | S  | 951.39  | 604.33  | 5  |
| 10 | Q  | 1079.45 | 517.30  | 4  |
| 11 | L  | 1192.53 | 389.24  | 3  |
| 12 | E  | 1321.57 | 276.16  | 2  |
| 13 | K  | -       | 147.11  | 1  |

gi|70880016|gb|EAN93143.1| hypothetical protein, conserved [*Trypanosoma cruzi*]  
R.GGNVETEVLRL M+H=1342.732544 DeltaM=1.83953 z=2  
P(pep)=1.24E-05 Xcorr=3.17 DCn=0.32

#5683-5683 NL: 2.95E1

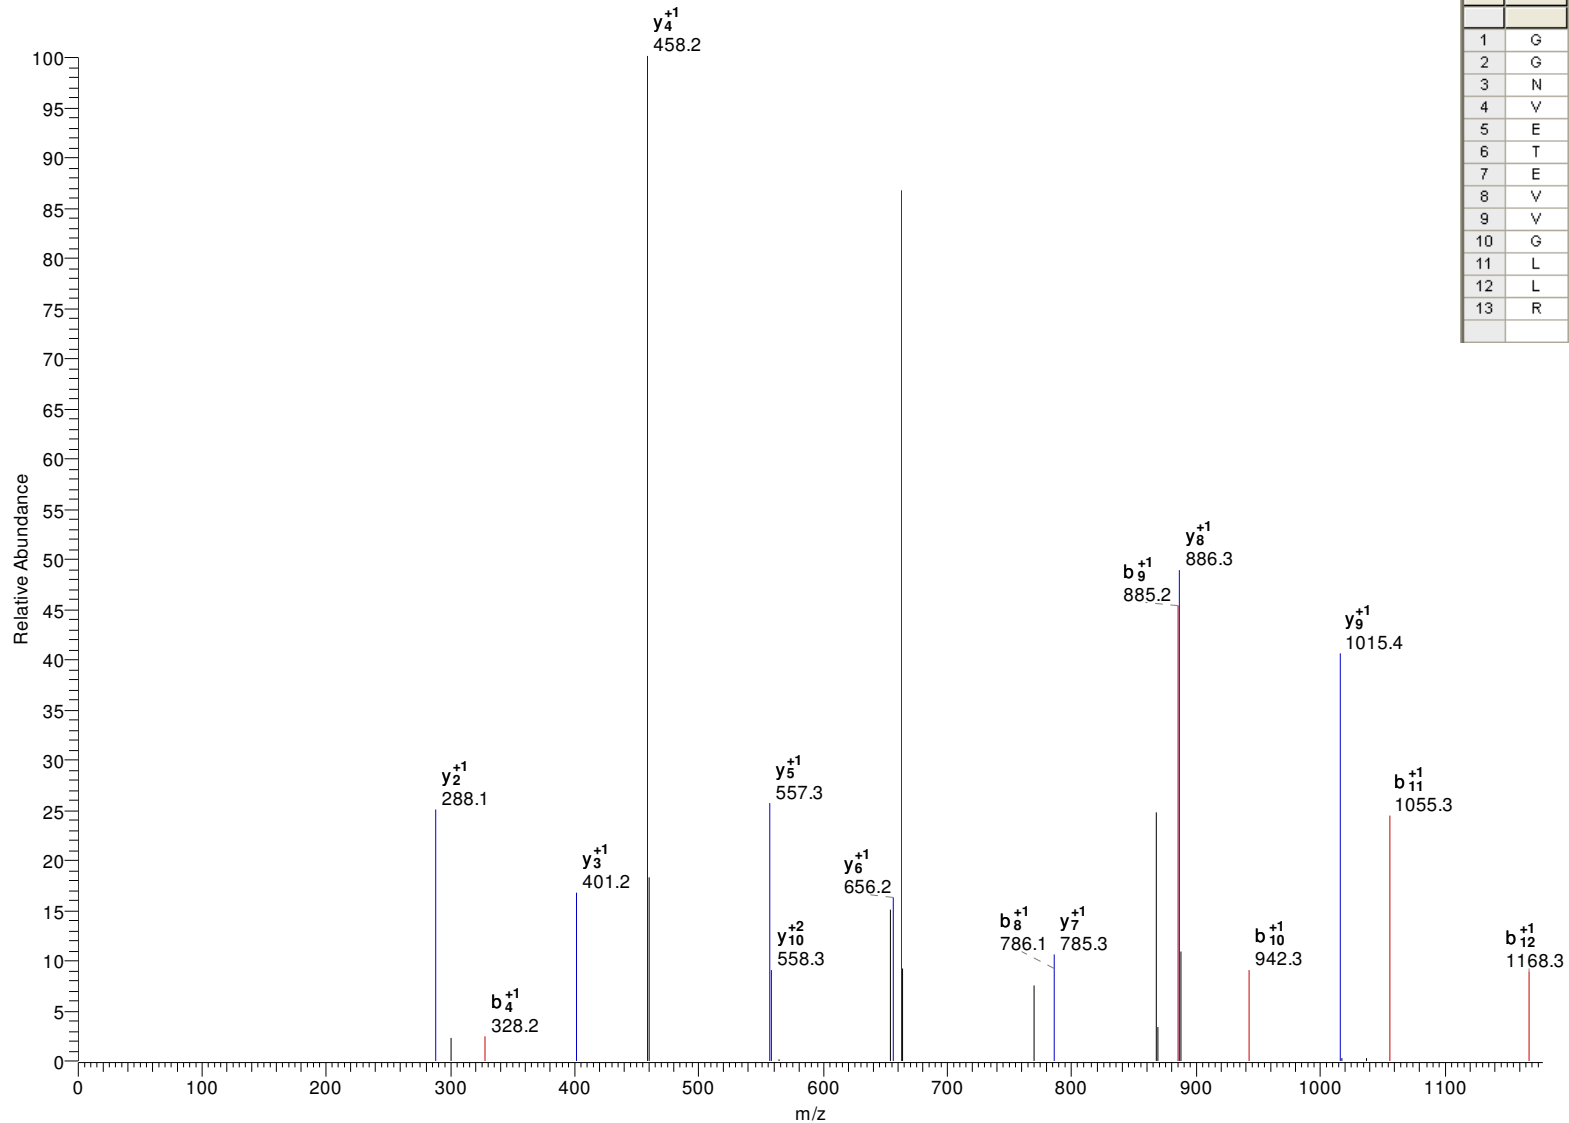

|    | AA | B                                   | Y                                   |    |
|----|----|-------------------------------------|-------------------------------------|----|
|    |    | <input checked="" type="checkbox"/> | <input checked="" type="checkbox"/> |    |
| 1  | G  | 58.03                               | -                                   | 13 |
| 2  | G  | 115.05                              | 1285.71                             | 12 |
| 3  | N  | 229.09                              | 1228.69                             | 11 |
| 4  | V  | 328.16                              | 1114.65                             | 10 |
| 5  | E  | 457.20                              | 1015.58                             | 9  |
| 6  | T  | 558.25                              | 886.54                              | 8  |
| 7  | E  | 687.29                              | 785.49                              | 7  |
| 8  | V  | 786.36                              | 656.45                              | 6  |
| 9  | V  | 885.43                              | 557.38                              | 5  |
| 10 | G  | 942.45                              | 458.31                              | 4  |
| 11 | L  | 1055.54                             | 401.29                              | 3  |
| 12 | L  | 1168.62                             | 288.20                              | 2  |
| 13 | R  | -                                   | 175.12                              | 1  |

gi|70878941|gb|EAN92155.1| hypothetical protein, conserved [*Trypanosoma cruzi*]  
K.SLPFQADPTGQIR.L M+H=1429.743408 DeltaM=1.97783 z=2  
P(pep)=6.39E-06 Xcorr=3.07 DCn=0.40

#3907-3907 NL: 1.40E3

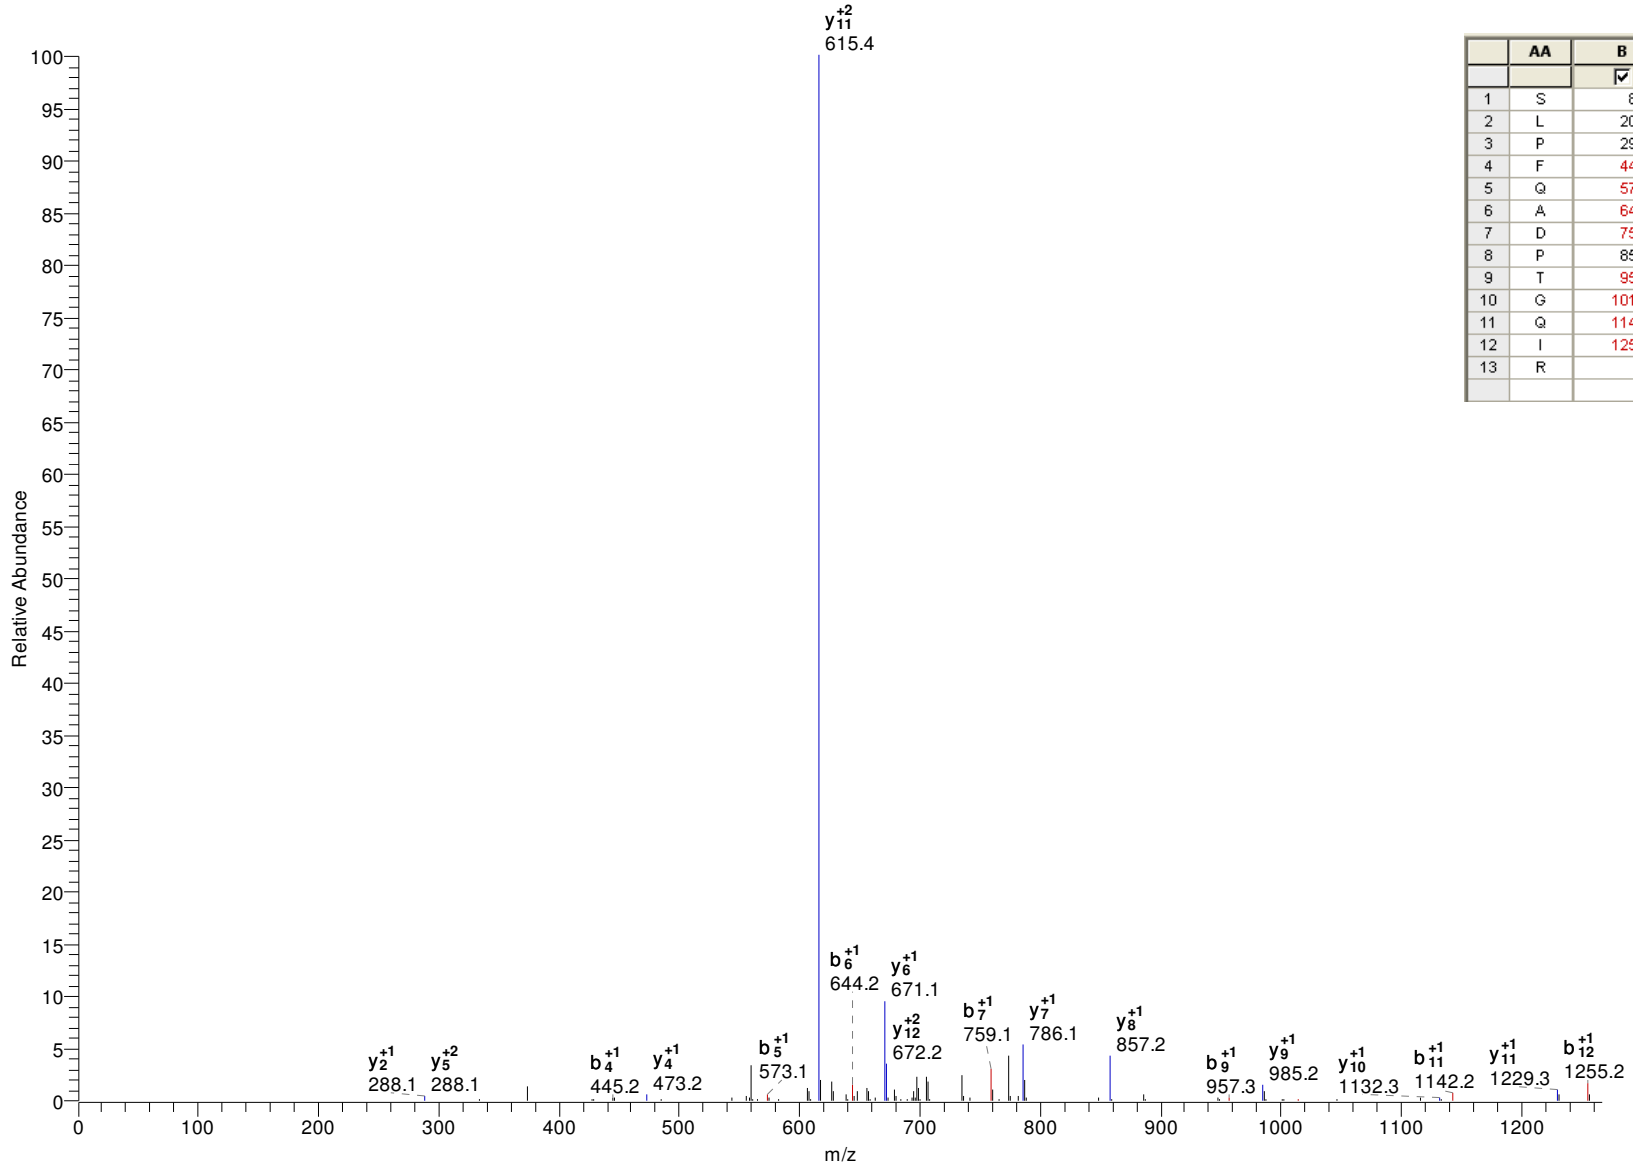

|    | AA | B       | Y       |    |
|----|----|---------|---------|----|
|    |    | ✓       | ✓       |    |
| 1  | S  | 88.04   | -       | 13 |
| 2  | L  | 201.12  | 1342.71 | 12 |
| 3  | P  | 298.18  | 1229.63 | 11 |
| 4  | F  | 445.24  | 1132.57 | 10 |
| 5  | Q  | 573.30  | 985.51  | 9  |
| 6  | A  | 644.34  | 857.45  | 8  |
| 7  | D  | 759.37  | 786.41  | 7  |
| 8  | P  | 856.42  | 671.38  | 6  |
| 9  | T  | 957.47  | 574.33  | 5  |
| 10 | G  | 1014.49 | 473.28  | 4  |
| 11 | Q  | 1142.55 | 416.26  | 3  |
| 12 | I  | 1255.63 | 288.20  | 2  |
| 13 | R  | -       | 175.12  | 1  |

gi|70879974|gb|EAN93104.1| hypothetical protein, conserved [*Trypanosoma cruzi*]  
 K.GLSHEDATTIVNIISK.D M+H=1697.90686 DeltaM=1.21977 z=2  
 P(pep)=1.46E-09 Xcorr=3.03 DCn=0.47

#4602-4602 NL: 1.74E1

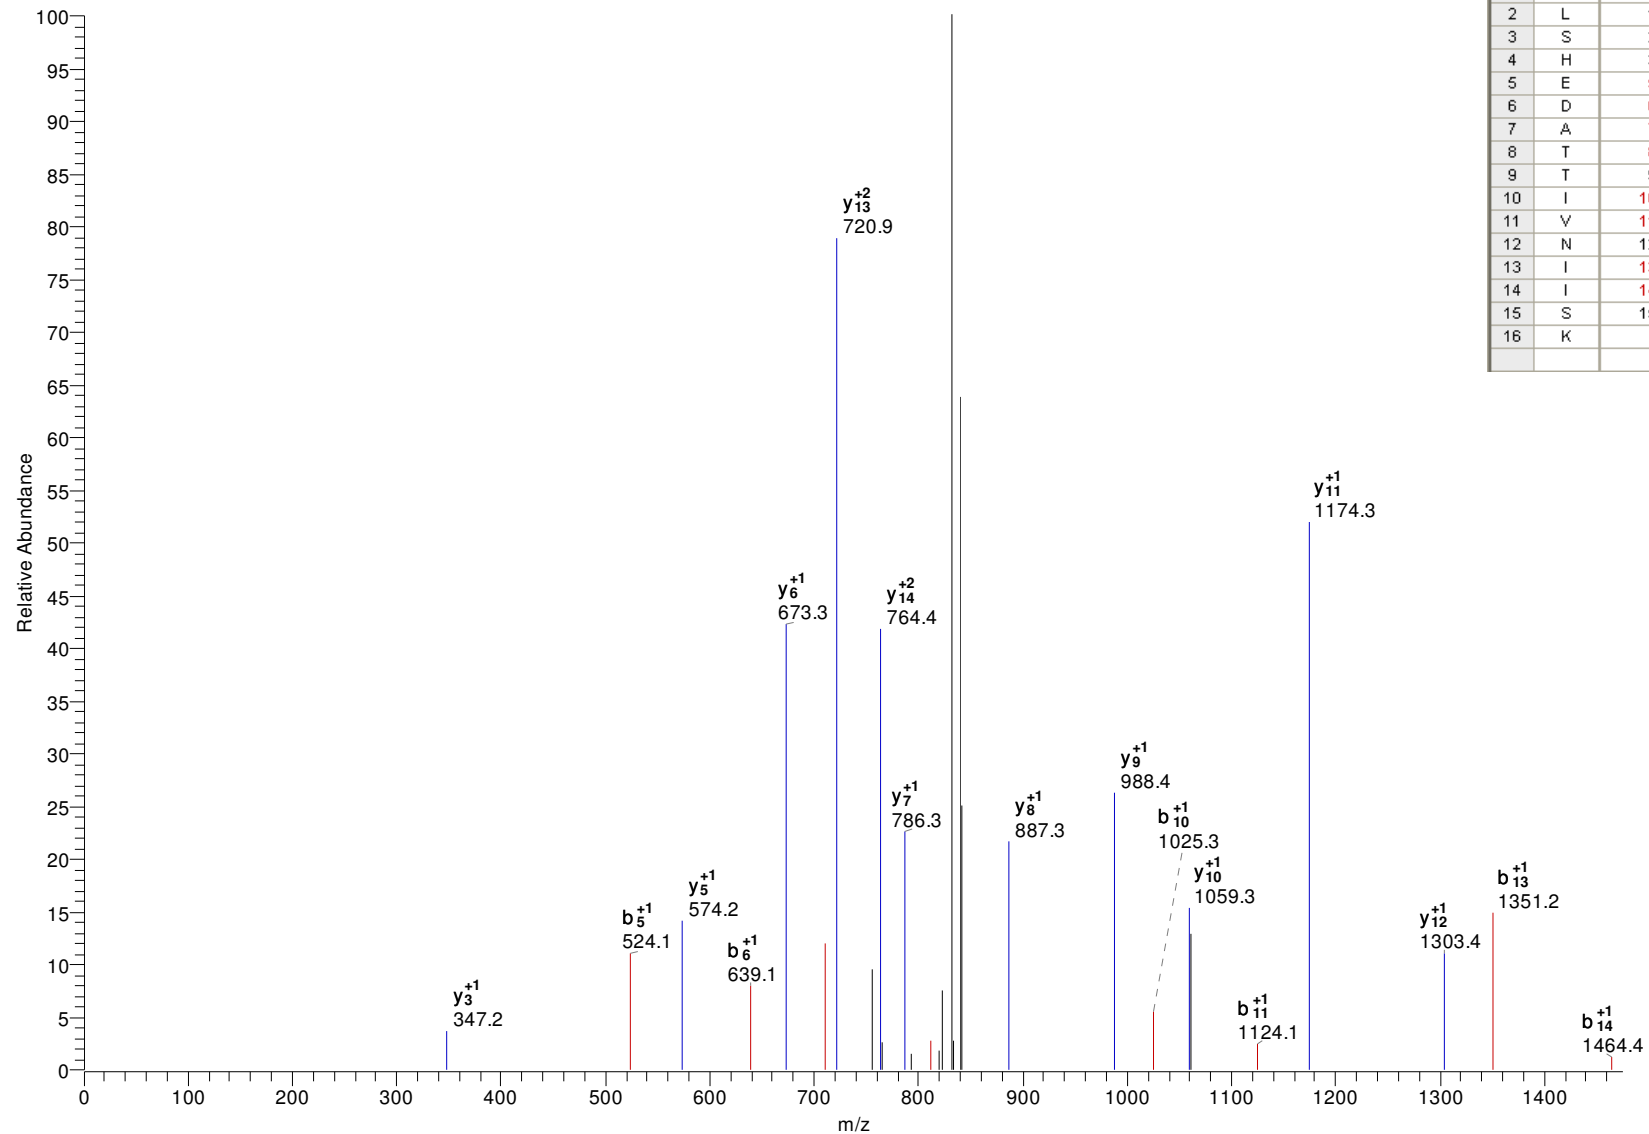

|    | AA | B       | Y       |    |
|----|----|---------|---------|----|
|    |    | ☑       | ☑       |    |
| 1  | G  | 58.03   | -       | 16 |
| 2  | L  | 171.11  | 1640.89 | 15 |
| 3  | S  | 258.14  | 1527.80 | 14 |
| 4  | H  | 395.20  | 1440.77 | 13 |
| 5  | E  | 524.25  | 1303.71 | 12 |
| 6  | D  | 639.27  | 1174.67 | 11 |
| 7  | A  | 710.31  | 1059.64 | 10 |
| 8  | T  | 811.36  | 988.60  | 9  |
| 9  | T  | 912.41  | 887.56  | 8  |
| 10 | I  | 1025.49 | 786.51  | 7  |
| 11 | V  | 1124.56 | 673.42  | 6  |
| 12 | N  | 1238.60 | 574.36  | 5  |
| 13 | I  | 1351.69 | 460.31  | 4  |
| 14 | I  | 1464.77 | 347.23  | 3  |
| 15 | S  | 1551.80 | 234.14  | 2  |
| 16 | K  | -       | 147.11  | 1  |



gi|19401140|gb|AAL87542.1|AF254412\_2 proton motive P-type ATPase 2 [*Trypanosoma cruzi*]  
 -.VDVNDLPDDLGEK.- M+H=1428.685303 DeltaM=-0.05794 z=2  
 P(pep)=3.19E-4 Xcorr=2.97 DCn=0.43

#3733-3733 NL: 3.59E2

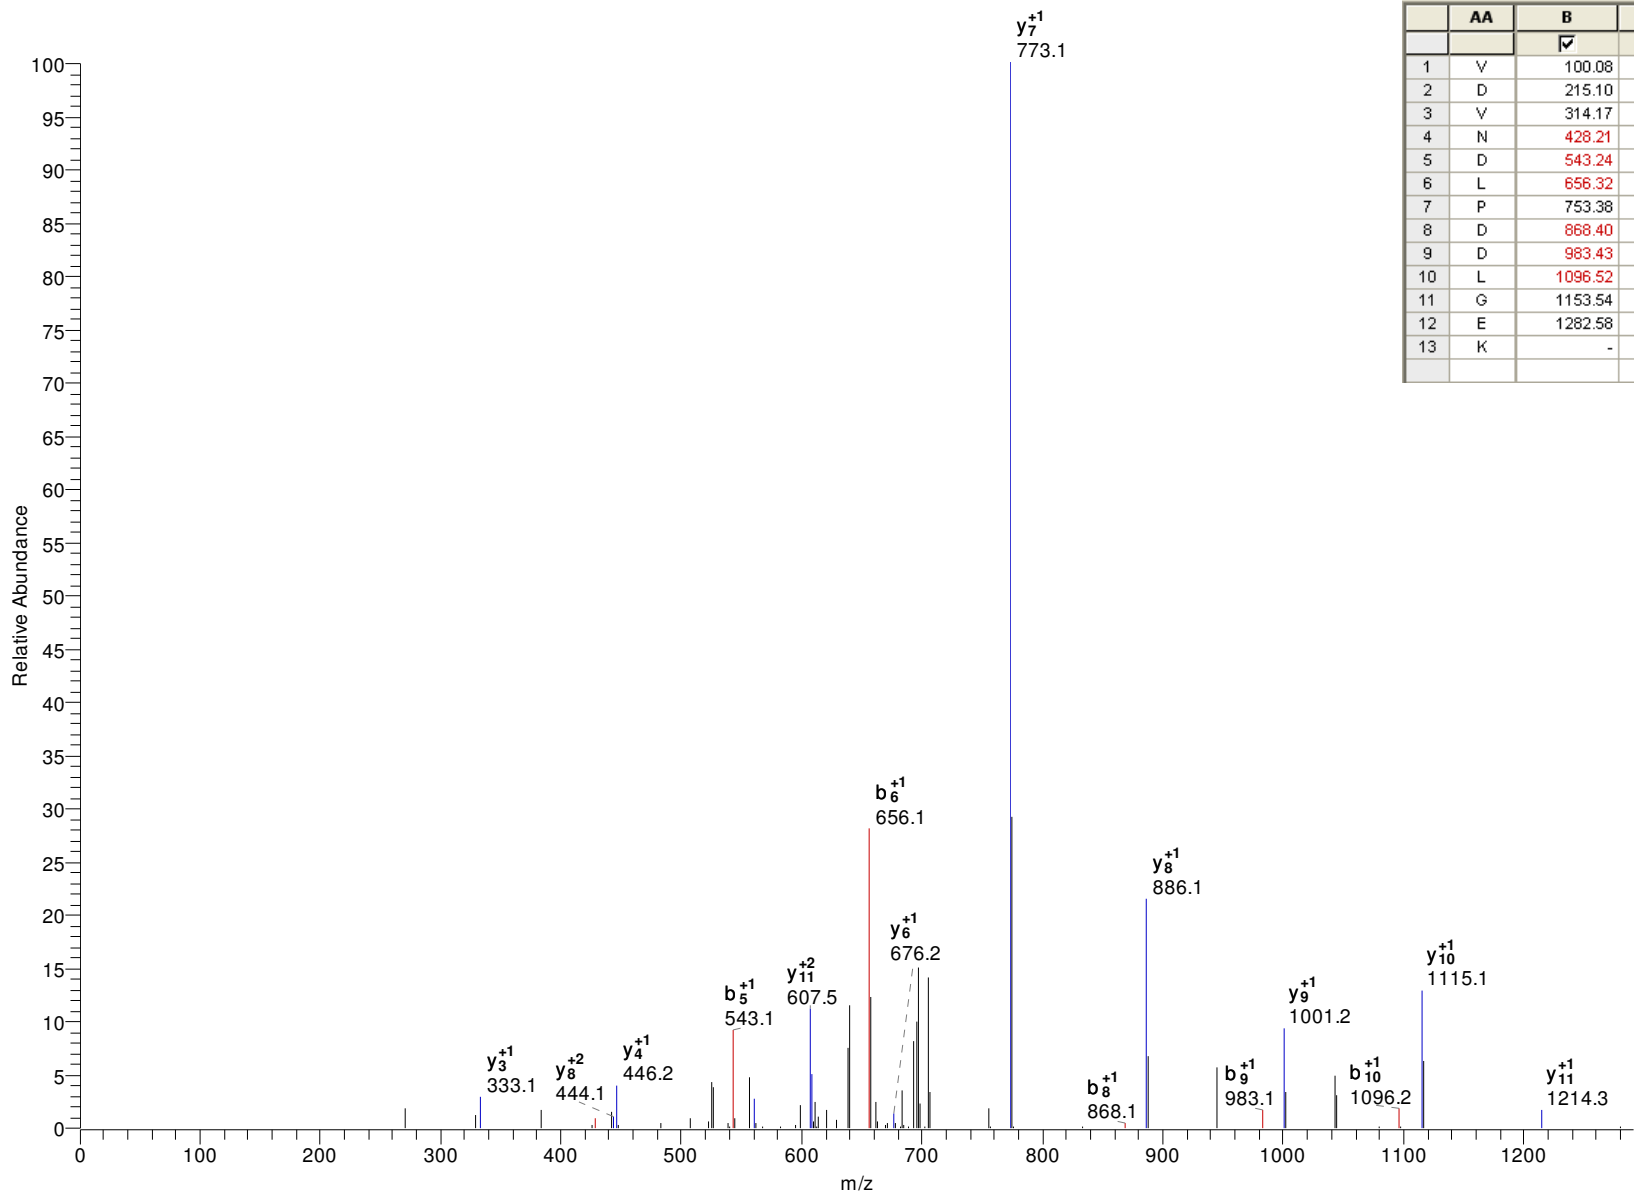

|    | AA | B       | Y       |    |
|----|----|---------|---------|----|
|    |    | ✓       | ✓       |    |
| 1  | V  | 100.08  | -       | 13 |
| 2  | D  | 215.10  | 1329.62 | 12 |
| 3  | V  | 314.17  | 1214.59 | 11 |
| 4  | N  | 428.21  | 1115.52 | 10 |
| 5  | D  | 543.24  | 1001.48 | 9  |
| 6  | L  | 656.32  | 886.45  | 8  |
| 7  | P  | 753.38  | 773.37  | 7  |
| 8  | D  | 868.40  | 676.31  | 6  |
| 9  | D  | 983.43  | 561.29  | 5  |
| 10 | L  | 1096.52 | 446.26  | 4  |
| 11 | G  | 1153.54 | 333.18  | 3  |
| 12 | E  | 1282.58 | 276.16  | 2  |
| 13 | K  | -       | 147.11  | 1  |

gi|70885176|gb|EAN98005.1| procyclic form surface glycoprotein, putative [*Trypanosoma cruzi*]  
 K.GVDGATSVFAEAVVPVSQR.S M+H=1888.976318 DeltaM=0.21904 z=2  
 P(pep)=1.41E-4 Xcorr=2.92 DCn=0.40

#4656-4656 NL: 3.60E2

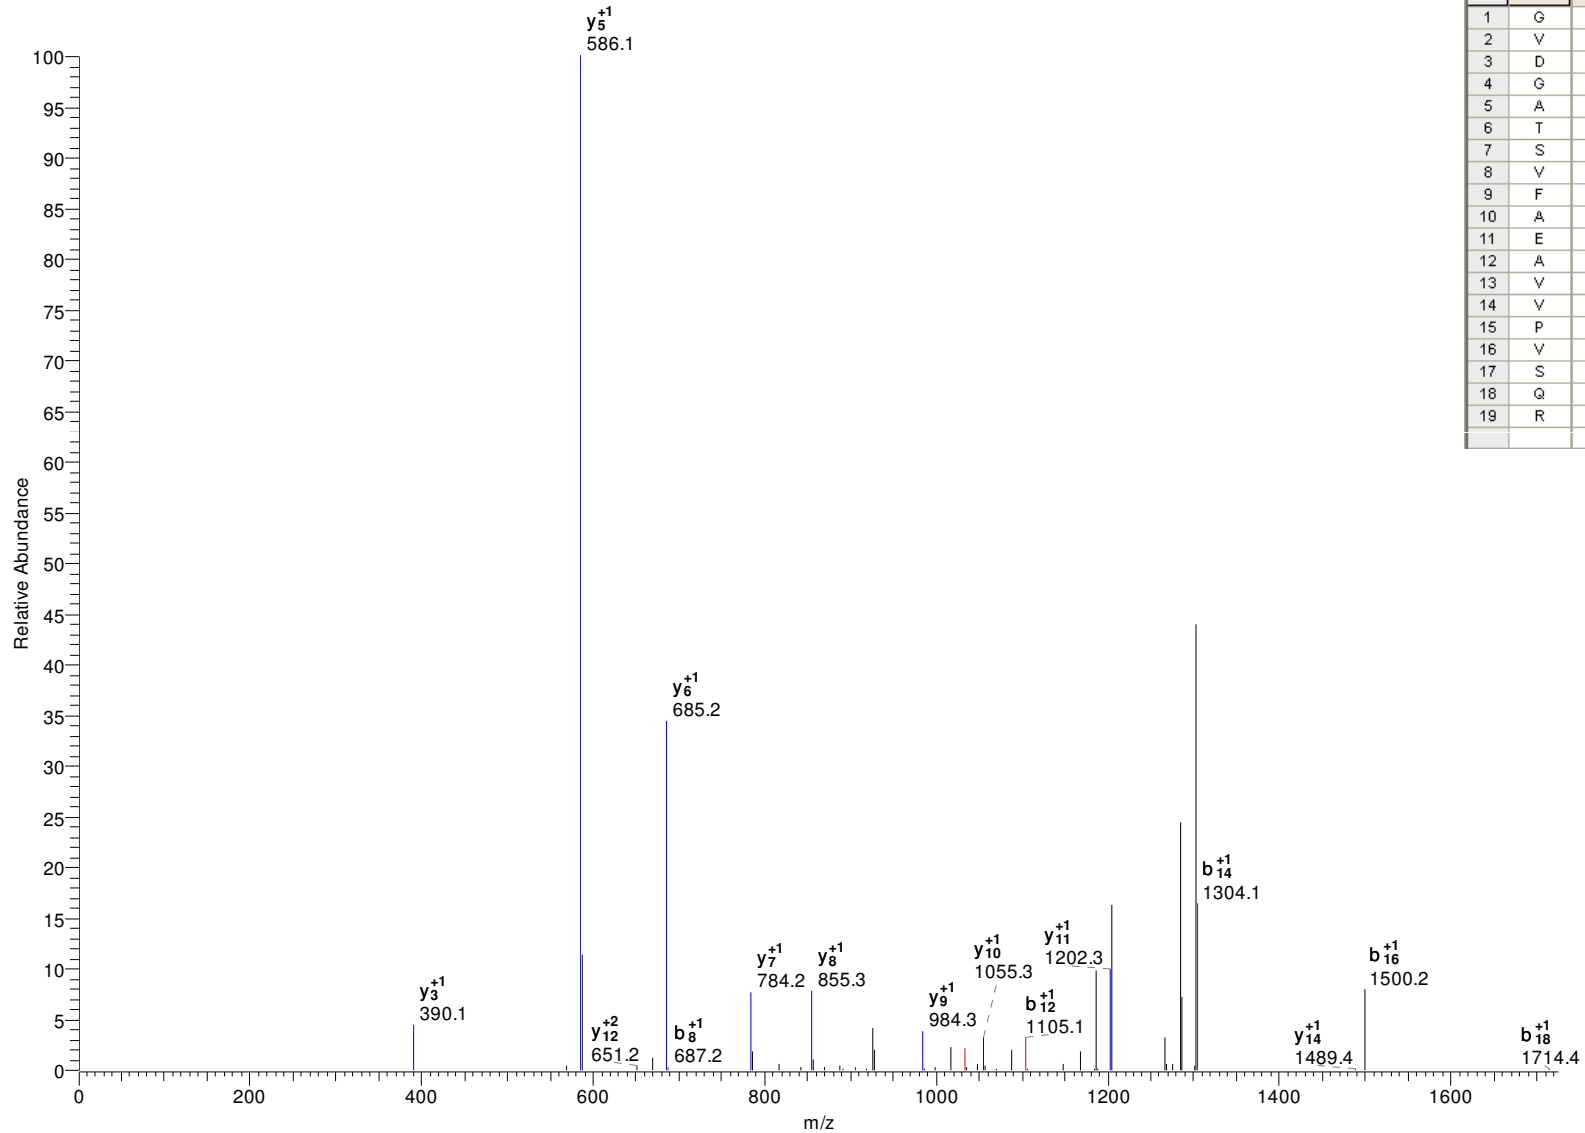

|    | AA | B       | Y       |    |
|----|----|---------|---------|----|
|    |    | ☑       | ☑       |    |
| 1  | G  | 58.03   | -       | 19 |
| 2  | V  | 157.10  | 1831.95 | 18 |
| 3  | D  | 272.12  | 1732.89 | 17 |
| 4  | G  | 329.15  | 1617.86 | 16 |
| 5  | A  | 400.18  | 1560.84 | 15 |
| 6  | T  | 501.23  | 1489.80 | 14 |
| 7  | S  | 588.26  | 1388.75 | 13 |
| 8  | V  | 687.33  | 1301.72 | 12 |
| 9  | F  | 834.40  | 1202.65 | 11 |
| 10 | A  | 905.44  | 1055.58 | 10 |
| 11 | E  | 1034.48 | 984.55  | 9  |
| 12 | A  | 1105.52 | 855.50  | 8  |
| 13 | V  | 1204.58 | 784.47  | 7  |
| 14 | V  | 1303.65 | 685.40  | 6  |
| 15 | P  | 1400.71 | 586.33  | 5  |
| 16 | V  | 1499.77 | 489.28  | 4  |
| 17 | S  | 1586.81 | 390.21  | 3  |
| 18 | Q  | 1714.86 | 303.18  | 2  |
| 19 | R  | -       | 175.12  | 1  |

gi|70880914|gb|EAN93978.1| mucin TcMUCII, putative [*Trypanosoma cruzi*]

K.MNVNSEGSNTQEDEEGGRNK.A

M+H=2194.926514

DeltaM=1.03496

z=2

P(pep)=2.66E-4

Xcorr=2.85

DCn=0.25

#4561-4561 NL: 5.72E1

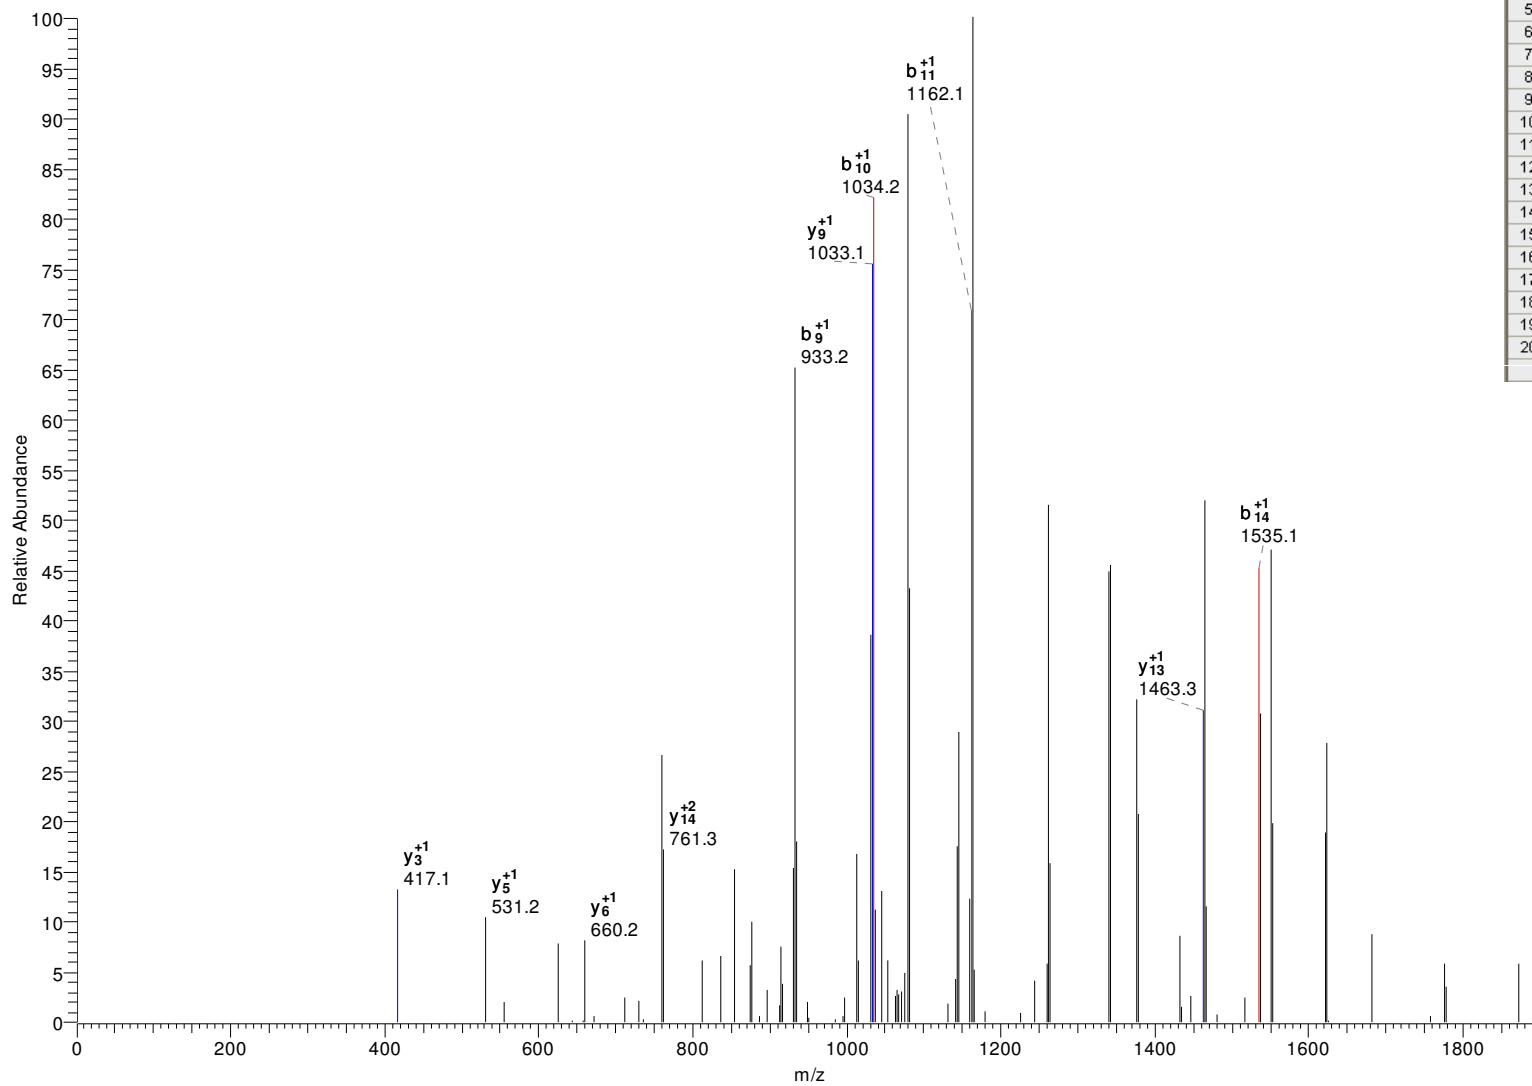

|    | AA | B       | Y       |    |
|----|----|---------|---------|----|
| 1  | M  | 132.05  | -       | 20 |
| 2  | N  | 246.09  | 2063.89 | 19 |
| 3  | V  | 345.16  | 1949.84 | 18 |
| 4  | N  | 459.20  | 1850.77 | 17 |
| 5  | S  | 546.23  | 1736.73 | 16 |
| 6  | E  | 675.28  | 1649.70 | 15 |
| 7  | G  | 732.30  | 1520.66 | 14 |
| 8  | S  | 819.33  | 1463.64 | 13 |
| 9  | N  | 933.37  | 1376.60 | 12 |
| 10 | T  | 1034.42 | 1262.56 | 11 |
| 11 | Q  | 1162.48 | 1161.51 | 10 |
| 12 | E  | 1291.52 | 1033.45 | 9  |
| 13 | D  | 1406.55 | 904.41  | 8  |
| 14 | E  | 1535.59 | 789.38  | 7  |
| 15 | E  | 1664.63 | 660.34  | 6  |
| 16 | G  | 1721.66 | 531.30  | 5  |
| 17 | G  | 1778.68 | 474.28  | 4  |
| 18 | R  | 1934.78 | 417.26  | 3  |
| 19 | N  | 2048.82 | 261.16  | 2  |
| 20 | K  | -       | 147.11  | 1  |

gi|70872828|gb|EAN86738.1| *trans*-sialidase, putative [*Trypanosoma cruzi*]

R.DNGEGSAISLSR.L M+H=1205.575684 DeltaM=0.12883 z=2

P(pep)=9.28E-05 Xcorr=2.70 DCn=0.45

#2562-2562 NL: 1.99E2

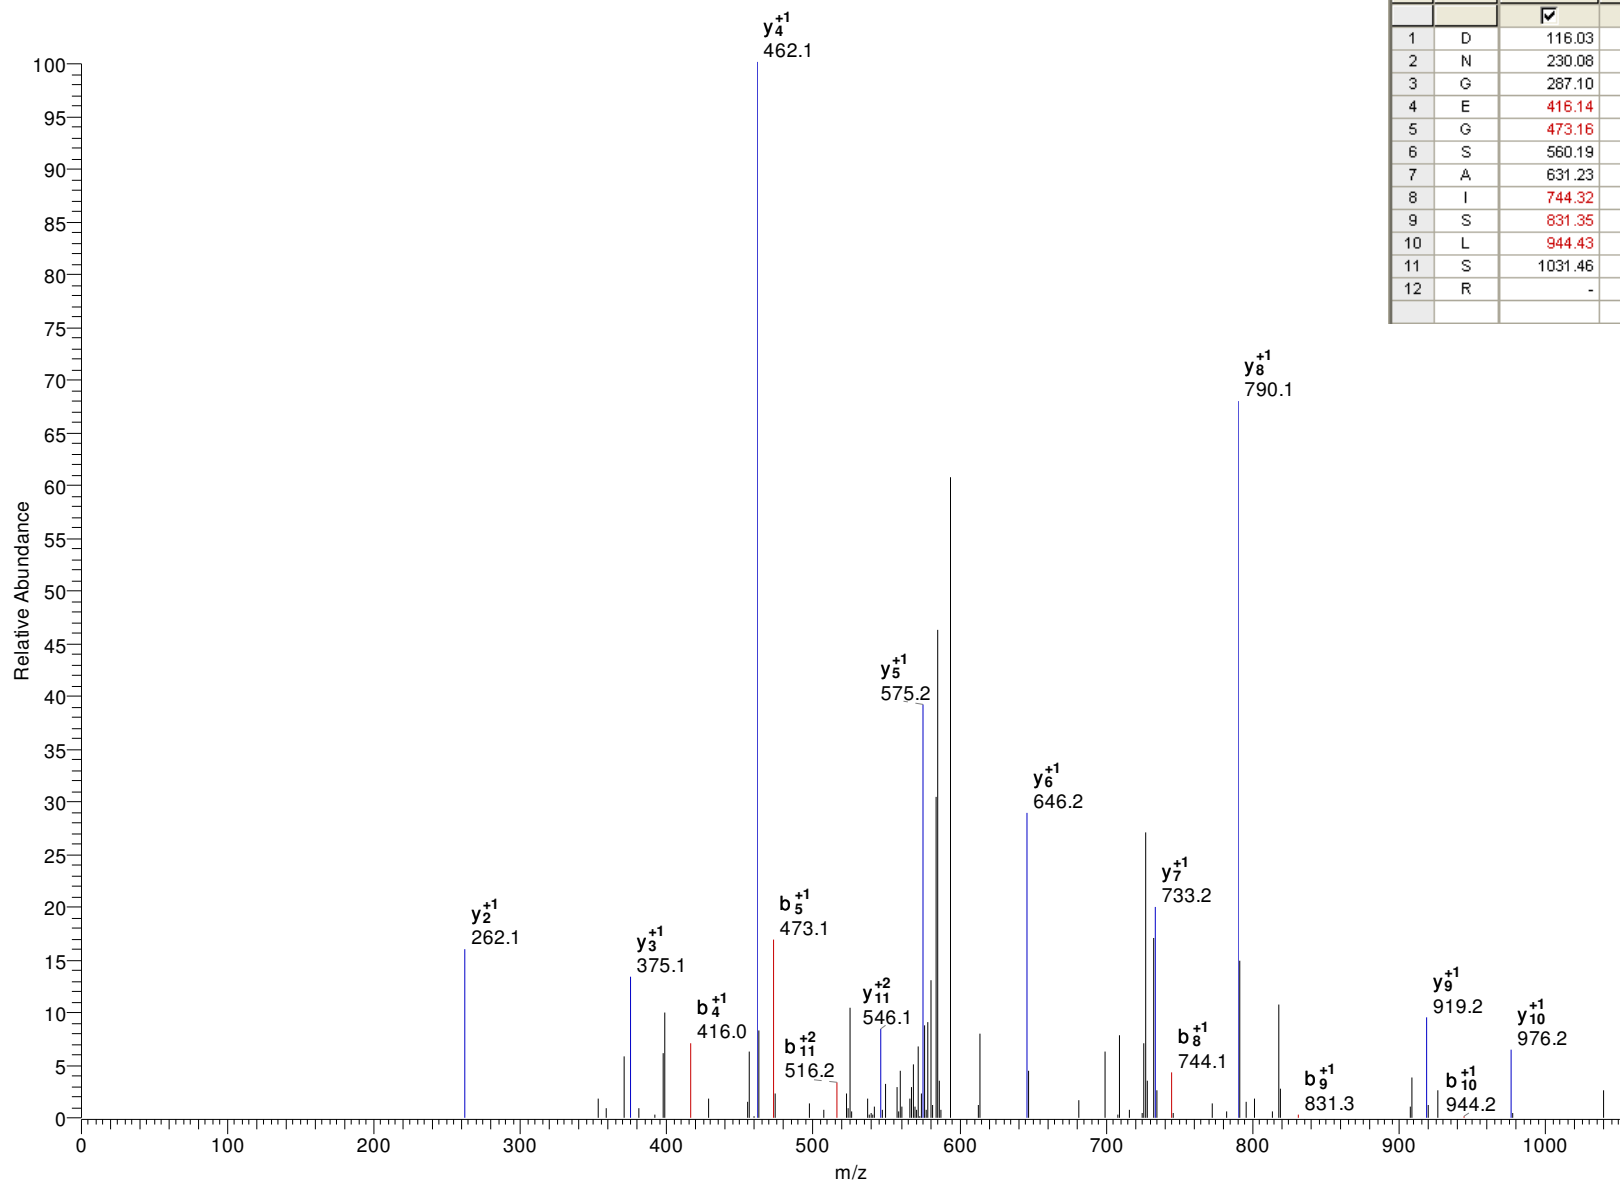

|    | AA | B       | Y       |    |
|----|----|---------|---------|----|
|    |    | ☑       | ☑       |    |
| 1  | D  | 116.03  | -       | 12 |
| 2  | N  | 230.08  | 1090.55 | 11 |
| 3  | G  | 287.10  | 976.51  | 10 |
| 4  | E  | 416.14  | 919.48  | 9  |
| 5  | G  | 473.16  | 790.44  | 8  |
| 6  | S  | 560.19  | 733.42  | 7  |
| 7  | A  | 631.23  | 646.39  | 6  |
| 8  | I  | 744.32  | 575.35  | 5  |
| 9  | S  | 831.35  | 462.27  | 4  |
| 10 | L  | 944.43  | 375.24  | 3  |
| 11 | S  | 1031.46 | 262.15  | 2  |
| 12 | R  | -       | 175.12  | 1  |

gi|70882897|gb|EAN95839.1| hypothetical protein, conserved [*Trypanosoma cruzi*]  
 K.RRPQLTEEER.A M+H=1313.692017 DeltaM=1.28528 z=3  
 P(pep)=3.85E-4 Xcorr=2.66 DCn=0.31

#2148-2148 NL: 4.10E3

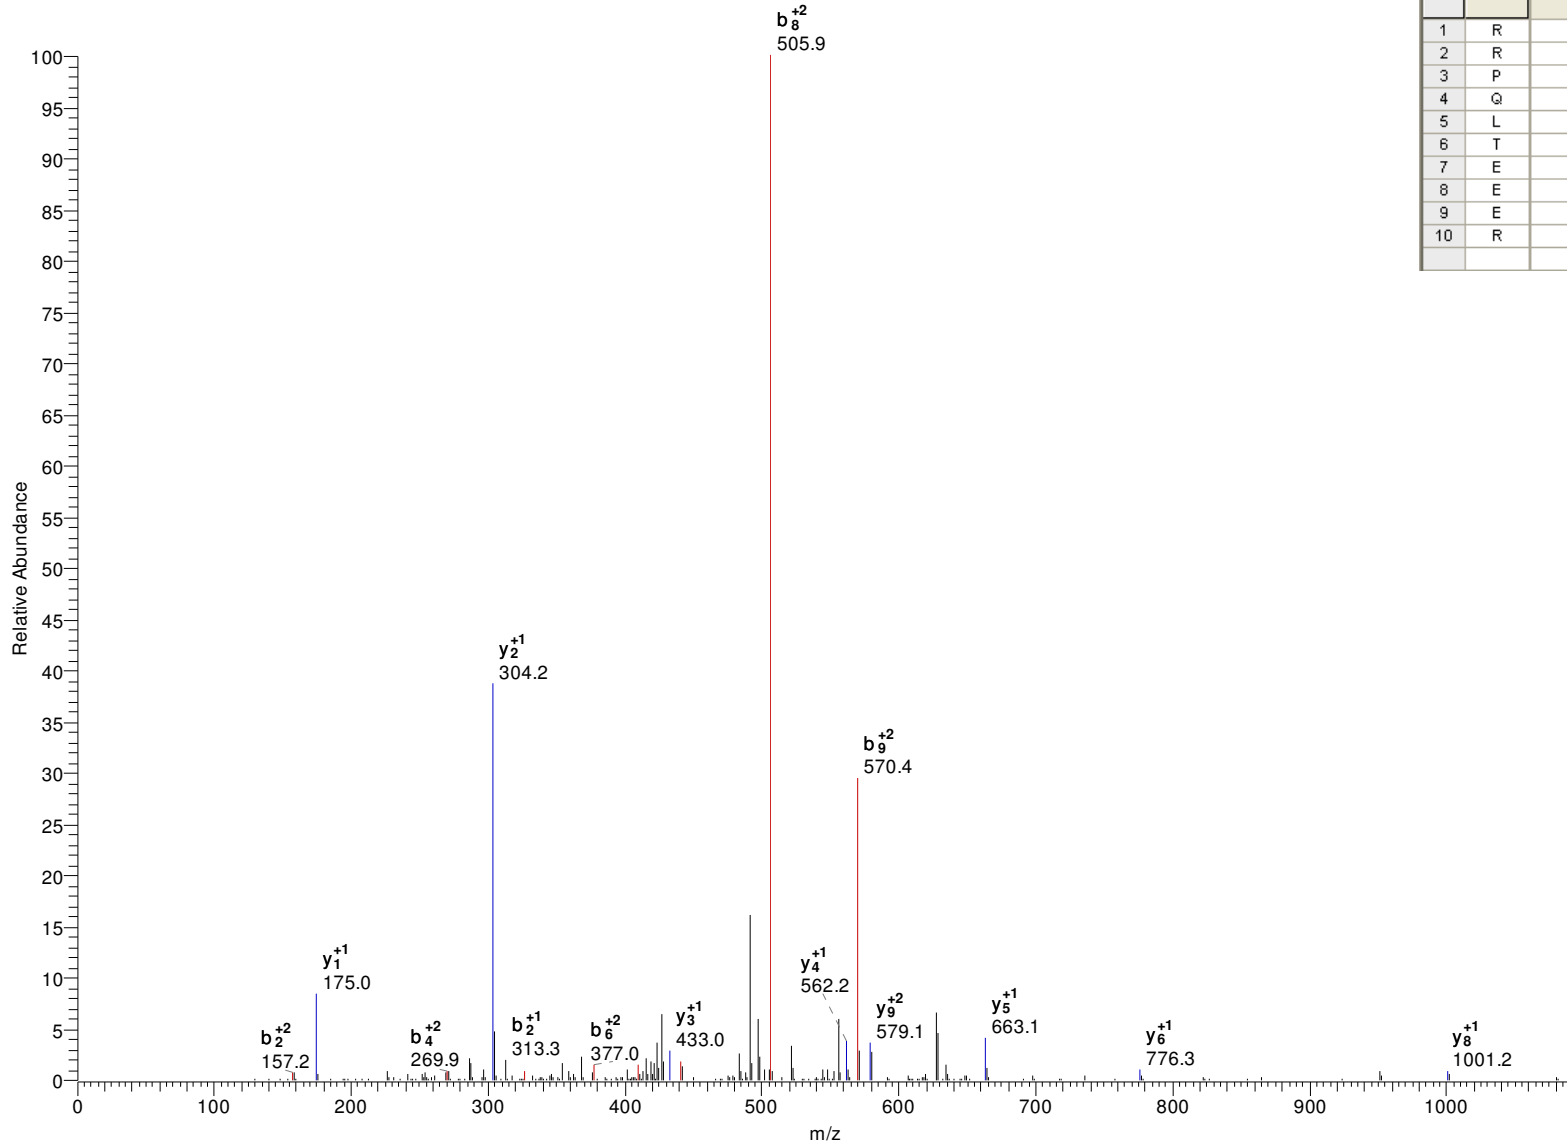

|    | AA | B       | Y       |    |
|----|----|---------|---------|----|
|    |    | ✓       | ✓       |    |
| 1  | R  | 157.11  | -       | 10 |
| 2  | R  | 313.21  | 1157.59 | 9  |
| 3  | P  | 410.26  | 1001.49 | 8  |
| 4  | Q  | 538.32  | 904.44  | 7  |
| 5  | L  | 651.40  | 776.38  | 6  |
| 6  | T  | 752.45  | 663.29  | 5  |
| 7  | E  | 881.50  | 562.25  | 4  |
| 8  | E  | 1010.54 | 433.20  | 3  |
| 9  | E  | 1139.58 | 304.16  | 2  |
| 10 | R  | -       | 175.12  | 1  |

-.VSESTWKAHTVLGPTDGDNR.-

P(pep)=1.01E-06

Xcorr=2.55

M+H=2271.100098

DCn=0.18

DeltaM=1.67179

z=3

#3519-3519 NL: 1.48E2

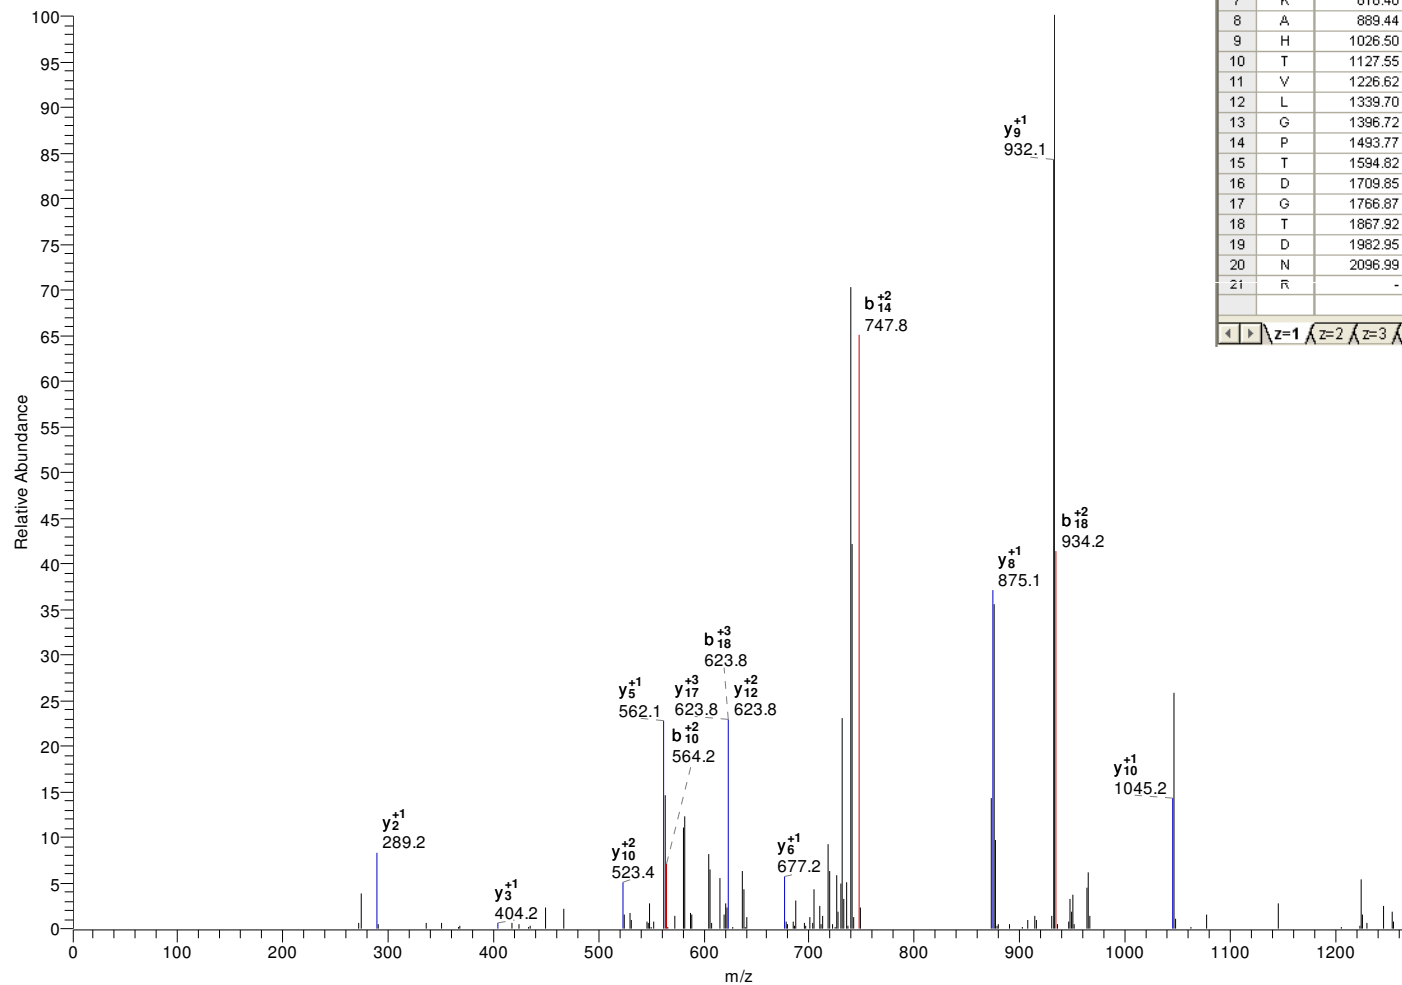

|    | AA | B       | Y       |    |    | AA | B       | Y       |    |
|----|----|---------|---------|----|----|----|---------|---------|----|
| 1  | V  | 100.08  | -       | 21 | 1  | V  | 50.54   | -       | 21 |
| 2  | S  | 187.11  | 2172.03 | 20 | 2  | S  | 94.06   | 1086.52 | 20 |
| 3  | E  | 316.15  | 2085.00 | 19 | 3  | E  | 158.58  | 1043.00 | 19 |
| 4  | S  | 403.18  | 1955.96 | 18 | 4  | S  | 202.09  | 978.48  | 18 |
| 5  | T  | 504.23  | 1868.92 | 17 | 5  | T  | 252.62  | 934.97  | 17 |
| 6  | WV | 690.31  | 1767.88 | 16 | 6  | WV | 345.66  | 884.44  | 16 |
| 7  | K  | 818.40  | 1581.80 | 15 | 7  | K  | 409.71  | 791.40  | 15 |
| 8  | A  | 889.44  | 1453.70 | 14 | 8  | A  | 445.22  | 727.36  | 14 |
| 9  | H  | 1026.50 | 1382.67 | 13 | 9  | H  | 513.75  | 691.84  | 13 |
| 10 | T  | 1127.55 | 1245.61 | 12 | 10 | T  | 564.28  | 623.31  | 12 |
| 11 | V  | 1226.62 | 1144.56 | 11 | 11 | V  | 613.81  | 572.78  | 11 |
| 12 | L  | 1339.70 | 1045.49 | 10 | 12 | L  | 670.35  | 523.25  | 10 |
| 13 | G  | 1396.72 | 932.41  | 9  | 13 | G  | 698.86  | 466.71  | 9  |
| 14 | P  | 1493.77 | 875.39  | 8  | 14 | P  | 747.39  | 438.20  | 8  |
| 15 | T  | 1594.82 | 778.33  | 7  | 15 | T  | 797.91  | 389.67  | 7  |
| 16 | D  | 1709.85 | 677.28  | 6  | 16 | D  | 855.43  | 339.15  | 6  |
| 17 | G  | 1766.87 | 562.26  | 5  | 17 | G  | 883.94  | 281.63  | 5  |
| 18 | T  | 1867.92 | 505.24  | 4  | 18 | T  | 934.46  | 253.12  | 4  |
| 19 | D  | 1982.95 | 404.19  | 3  | 19 | D  | 991.98  | 202.60  | 3  |
| 20 | N  | 2096.99 | 289.16  | 2  | 20 | N  | 1049.00 | 145.08  | 2  |
| 21 | R  | -       | 175.12  | 1  | 21 | R  | -       | 66.06   | 1  |

gi|70885177|gb|EAN98006.1| procyclic form surface glycoprotein, putative [*Trypanosoma cruzi*]

K.YAEDTNLR.S

M+H=981.463623

DeltaM=1.92766

z=2

P(pep)=6.05E-05

Xcorr=2.51

DCn=0.33

#2301-2301 NL: 6.14E2

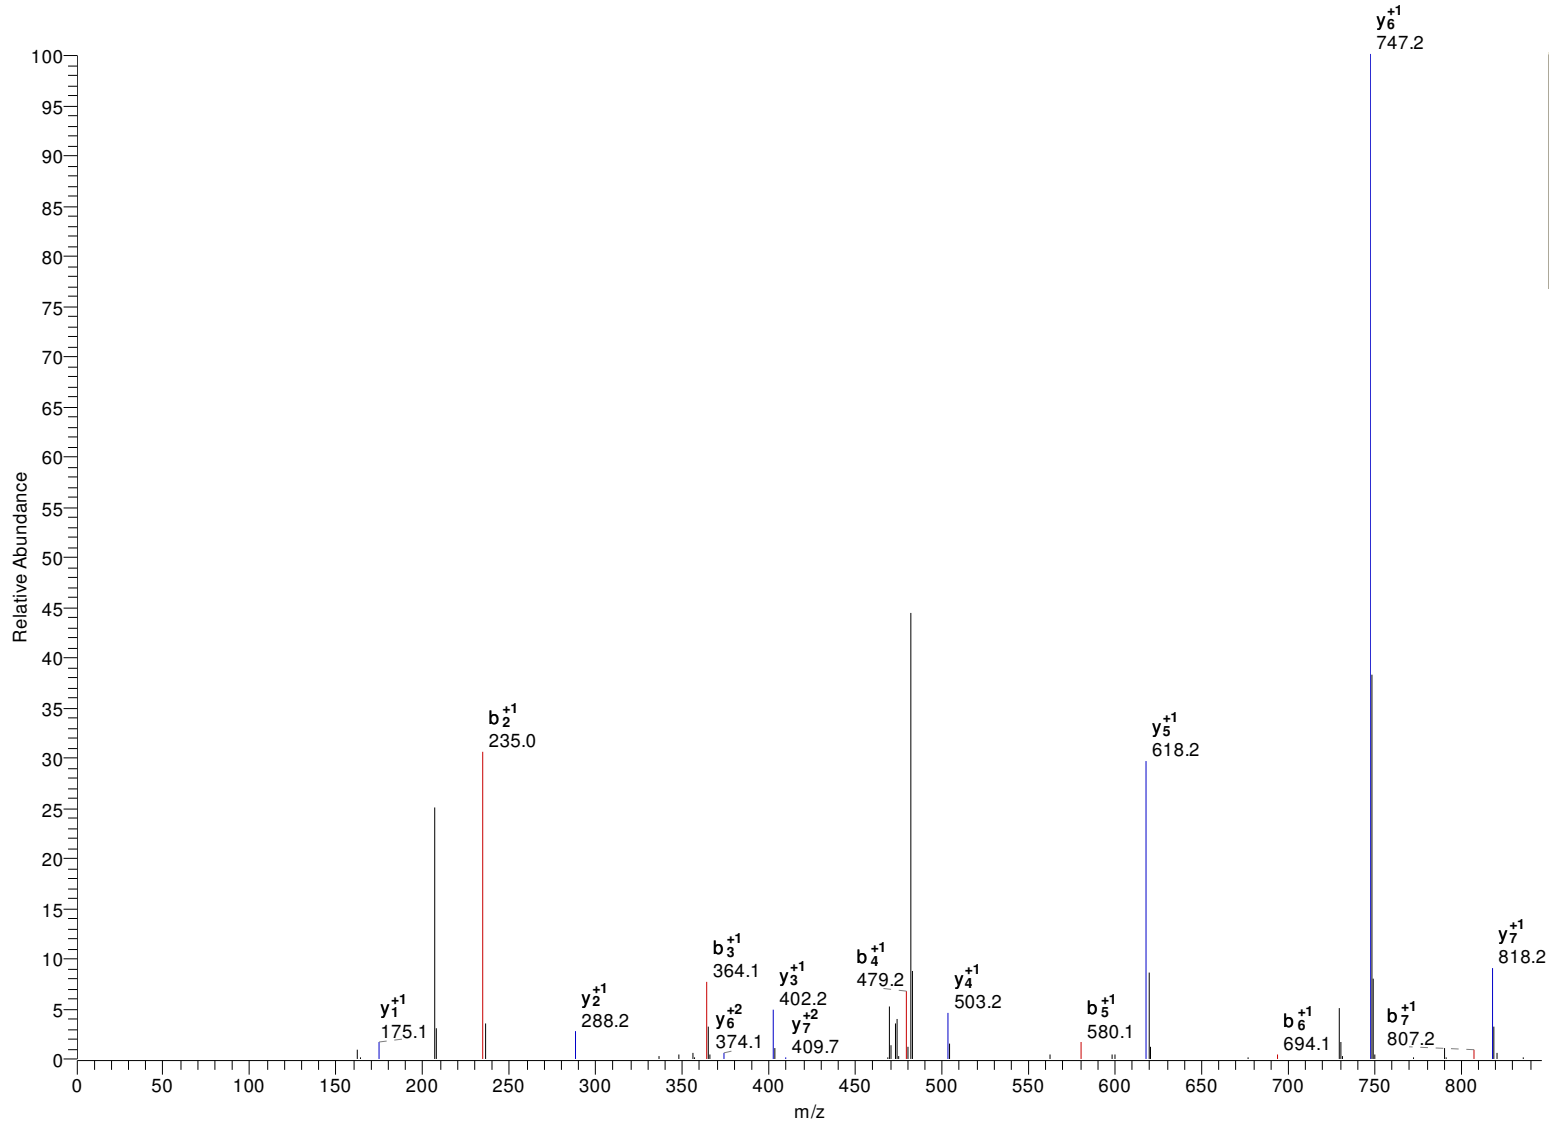

|   | AA | B      | Y      |   |
|---|----|--------|--------|---|
| 1 | Y  | 164.07 | -      | 8 |
| 2 | A  | 235.11 | 818.40 | 7 |
| 3 | E  | 364.15 | 747.36 | 6 |
| 4 | D  | 479.18 | 618.32 | 5 |
| 5 | T  | 580.22 | 503.29 | 4 |
| 6 | N  | 694.27 | 402.25 | 3 |
| 7 | L  | 807.35 | 288.20 | 2 |
| 8 | R  | -      | 175.12 | 1 |

gi|70876860|gb|EAN90267.1| hypothetical protein, conserved [*Trypanosoma cruzi*]  
-.AVFQGLSTK.- M+H=950.5305786 DeltaM=1.94139 z=2  
P(pep)=3.25E-4 Xcorr=2.51 DCn=0.39

#3223-3223 NL: 2.48E2

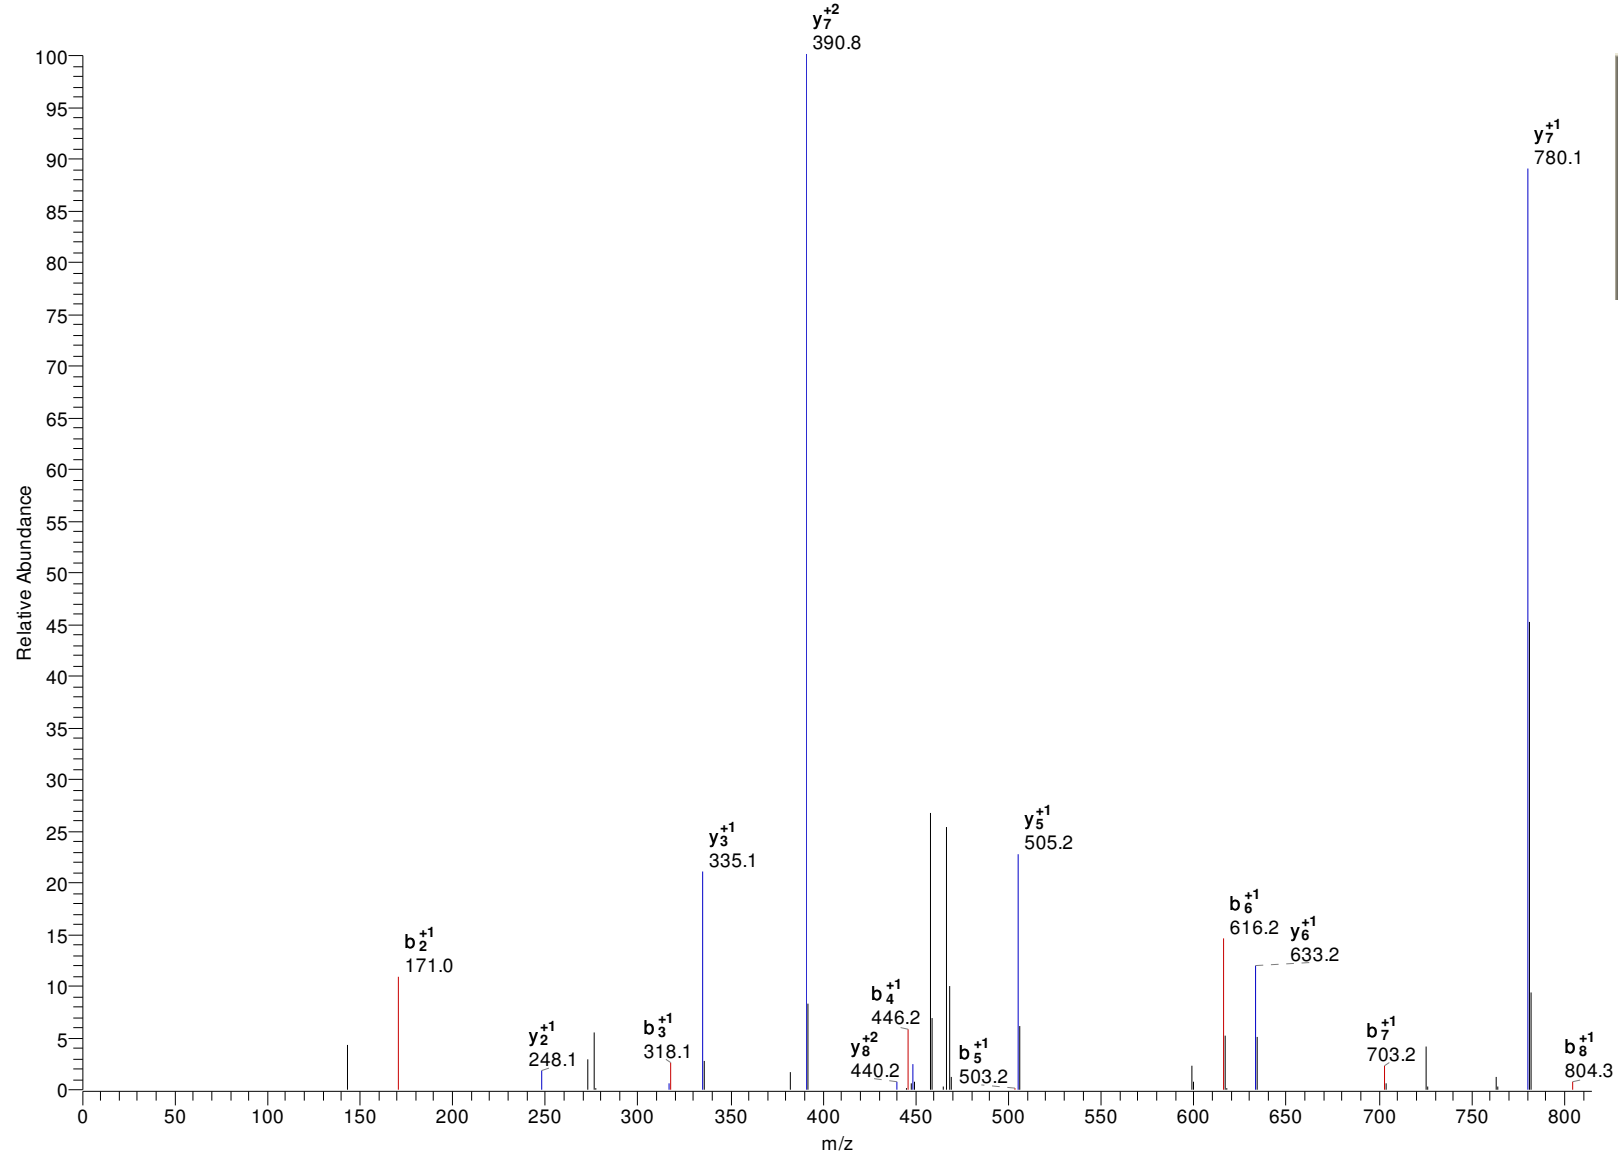

|   | AA | B      | Y      |   |
|---|----|--------|--------|---|
|   |    | ✓      | ✓      |   |
| 1 | A  | 72.04  | -      | 9 |
| 2 | V  | 171.11 | 879.49 | 8 |
| 3 | F  | 318.18 | 780.43 | 7 |
| 4 | Q  | 446.24 | 633.36 | 6 |
| 5 | G  | 503.26 | 505.30 | 5 |
| 6 | L  | 616.35 | 448.28 | 4 |
| 7 | S  | 703.38 | 335.19 | 3 |
| 8 | T  | 804.43 | 248.16 | 2 |
| 9 | K  | -      | 147.11 | 1 |



gi|70884806|gb|EAN97651.1| hypothetical protein, conserved [*Trypanosoma cruzi*]  
 R.ALVEQAAPQGWYSTER.G M+H=1805.881714 DCn=0.14495 z=2  
 P(pep)=6.35E-4 Xcorr=2.45 DCn=0.49

#3830-3830 NL: 2.60E2

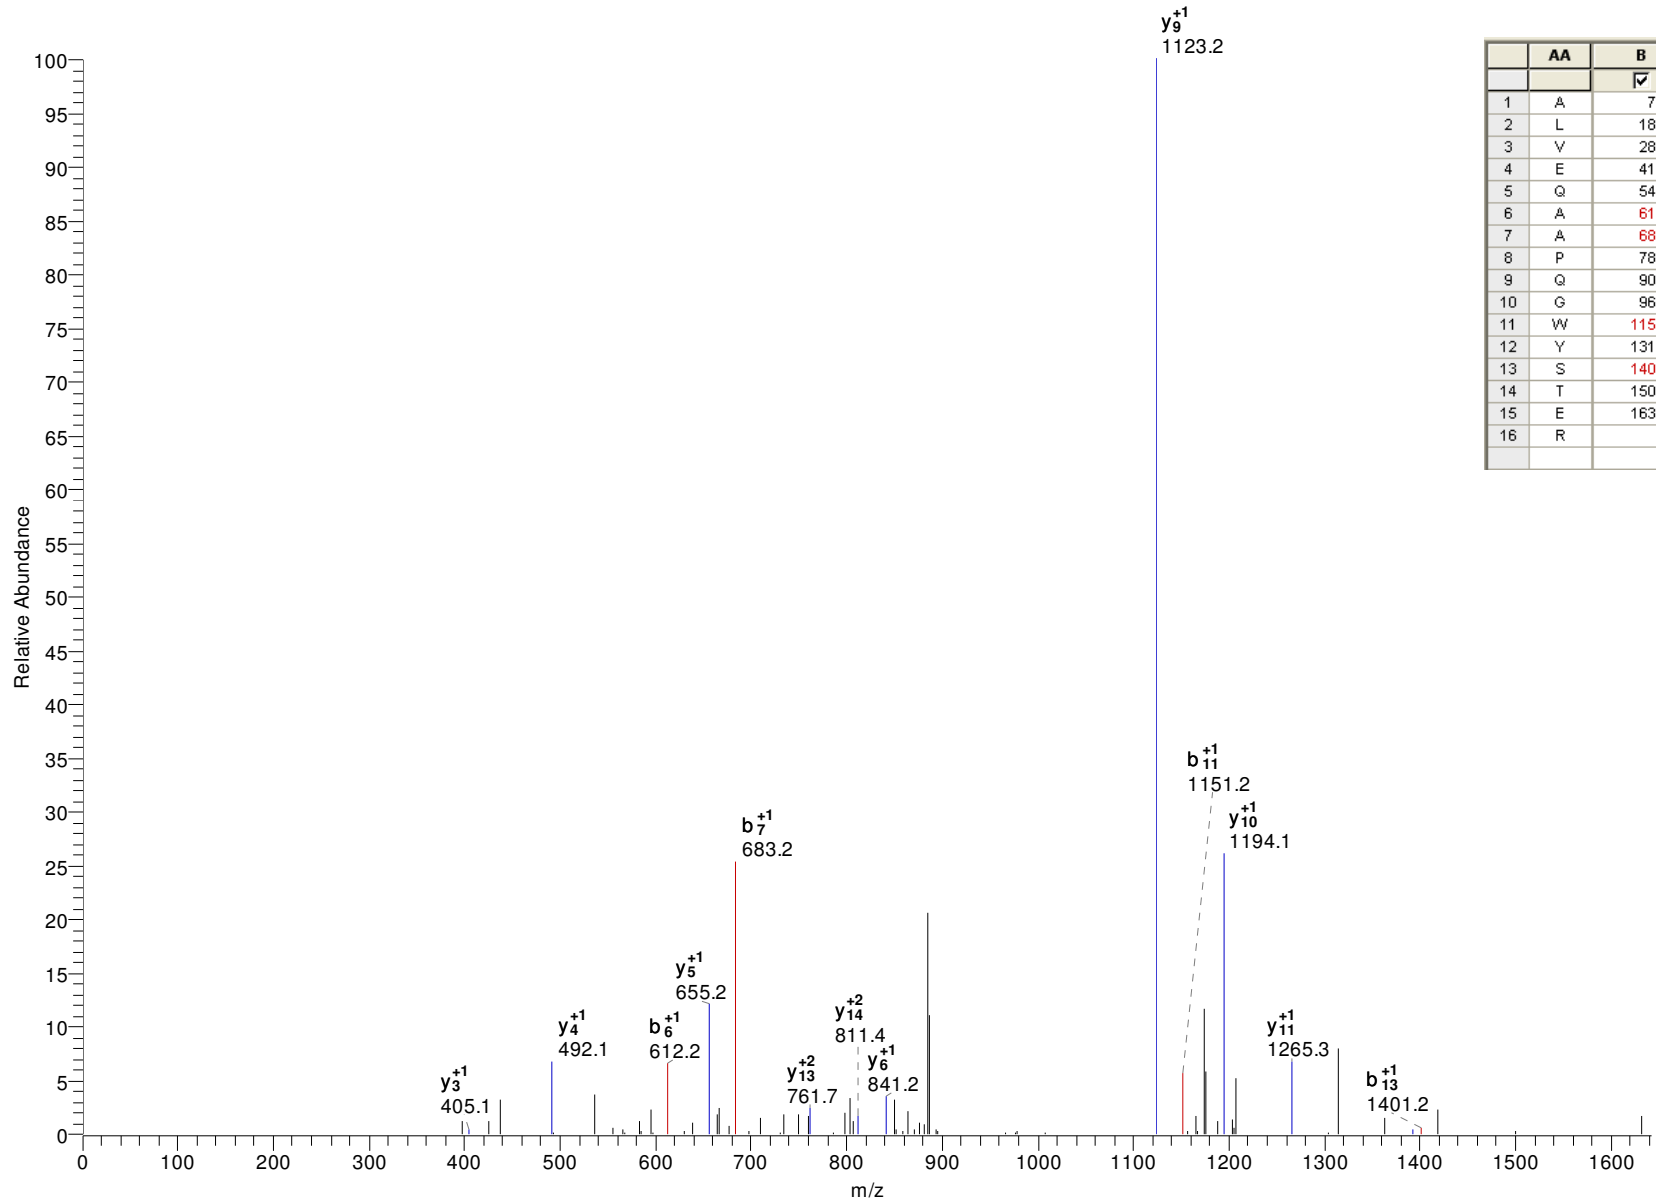

|    | AA | B       | Y       |    |
|----|----|---------|---------|----|
|    |    | ✓       | ✓       |    |
| 1  | A  | 72.04   | -       | 16 |
| 2  | L  | 185.13  | 1734.84 | 15 |
| 3  | V  | 284.20  | 1621.76 | 14 |
| 4  | E  | 413.24  | 1522.69 | 13 |
| 5  | Q  | 541.30  | 1393.65 | 12 |
| 6  | A  | 612.34  | 1265.59 | 11 |
| 7  | A  | 683.37  | 1194.55 | 10 |
| 8  | P  | 780.43  | 1123.52 | 9  |
| 9  | Q  | 908.48  | 1026.46 | 8  |
| 10 | G  | 965.51  | 898.41  | 7  |
| 11 | W  | 1151.58 | 841.38  | 6  |
| 12 | Y  | 1314.65 | 655.30  | 5  |
| 13 | S  | 1401.68 | 492.24  | 4  |
| 14 | T  | 1502.73 | 405.21  | 3  |
| 15 | E  | 1631.77 | 304.16  | 2  |
| 16 | R  | -       | 175.12  | 1  |

gi|70879827|gb|EAN92970.1| hexose transporter, putative [*Trypanosoma cruzi*]

K.TPCLDDSR.C

M+H=963.4200439

DCn=1.57878

z=2

P(pep)=7.46E-05

Xcorr=2.36

DCn=0.28

#2241-2241 NL: 4.47E2

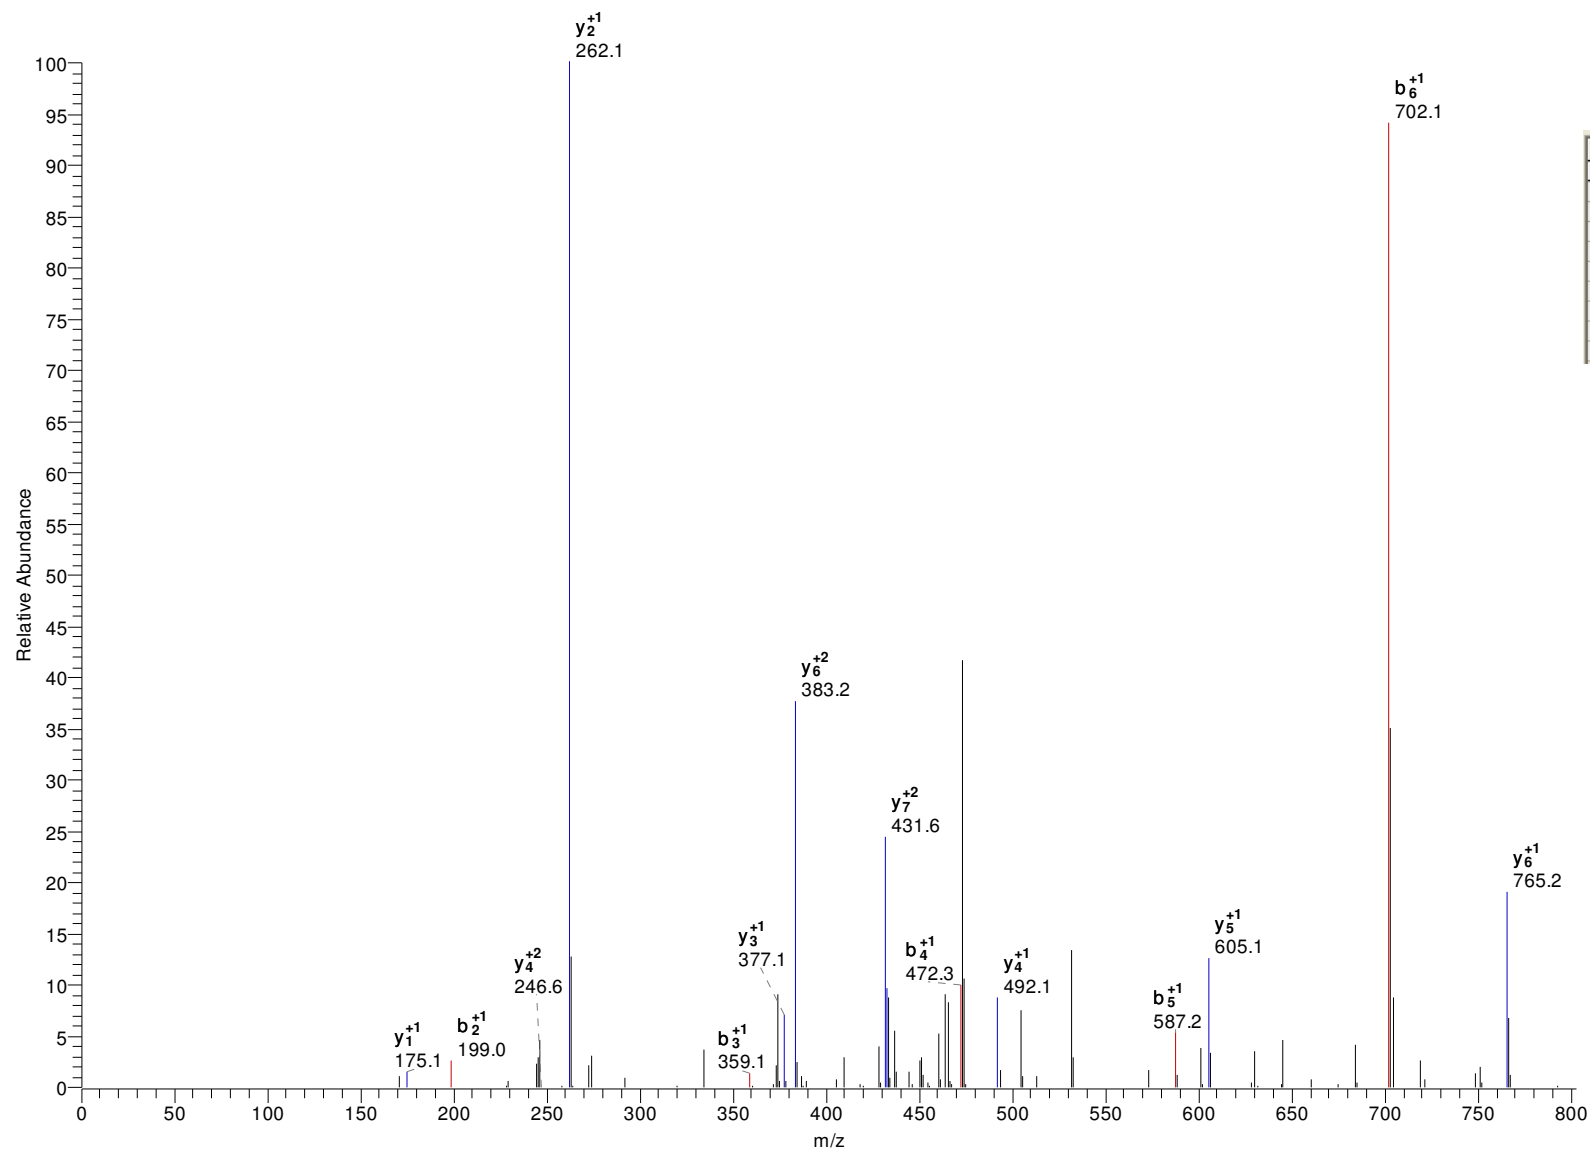

|   | AA | B      | Y      |   |
|---|----|--------|--------|---|
| 1 | T  | 102.05 | -      | 8 |
| 2 | P  | 199.11 | 862.37 | 7 |
| 3 | C  | 359.14 | 765.32 | 6 |
| 4 | L  | 472.22 | 605.29 | 5 |
| 5 | D  | 587.25 | 492.20 | 4 |
| 6 | D  | 702.28 | 377.18 | 3 |
| 7 | S  | 789.31 | 262.15 | 2 |
| 8 | R  | -      | 175.12 | 1 |

gi|22091470|gb|AAM91818.1| flagellar calcium binding protein 3 [*Trypanosoma cruzi*]  
 -.LDADGPDNVPEKA.- M+H=1455.65979 DeltaM=1.27336 z=2  
 P(pep)=3.60E-4 Xcorr=2.35 DCn=0.29

#2886-2888 NL: 3.77E2

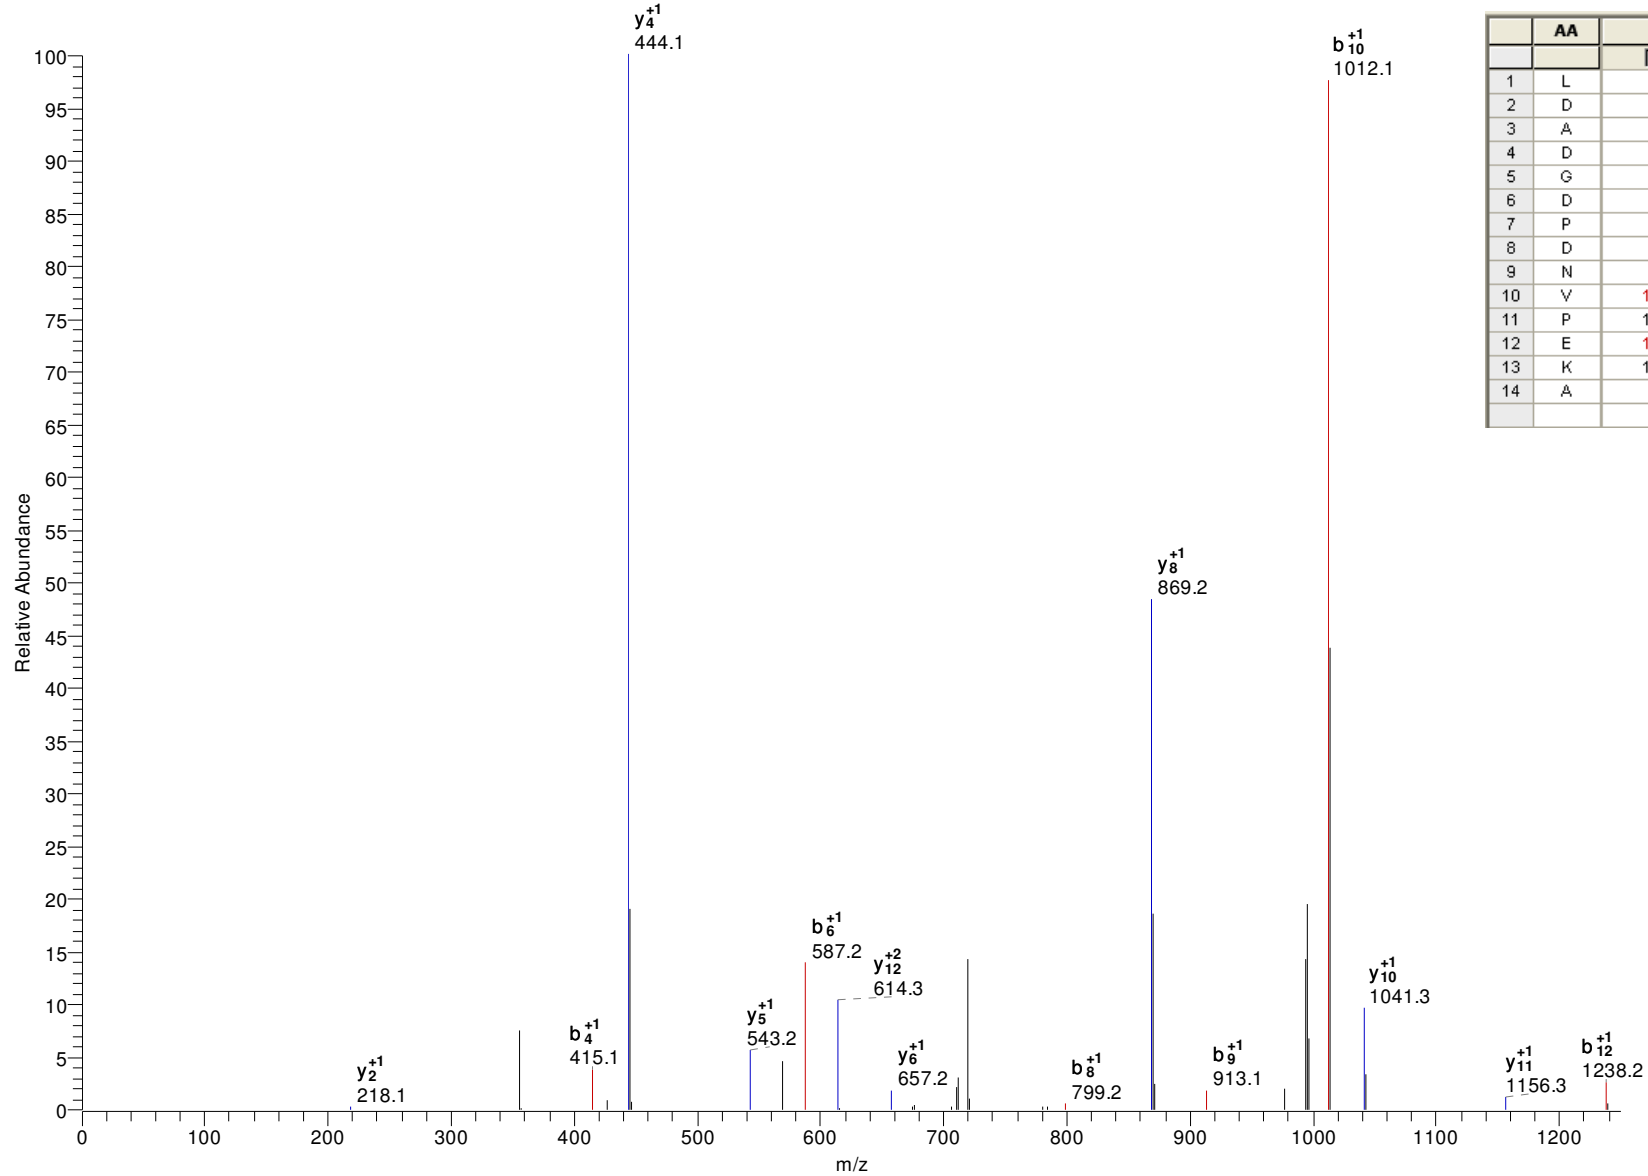

|    | AA | B       | Y       |    |
|----|----|---------|---------|----|
|    |    | ✓       | ✓       |    |
| 1  | L  | 114.09  | -       | 14 |
| 2  | D  | 229.12  | 1342.58 | 13 |
| 3  | A  | 300.16  | 1227.55 | 12 |
| 4  | D  | 415.18  | 1156.51 | 11 |
| 5  | G  | 472.20  | 1041.48 | 10 |
| 6  | D  | 587.23  | 984.46  | 9  |
| 7  | P  | 684.28  | 869.44  | 8  |
| 8  | D  | 799.31  | 772.38  | 7  |
| 9  | N  | 913.35  | 657.36  | 6  |
| 10 | V  | 1012.42 | 543.31  | 5  |
| 11 | P  | 1109.47 | 444.25  | 4  |
| 12 | E  | 1238.52 | 347.19  | 3  |
| 13 | K  | 1366.61 | 218.15  | 2  |
| 14 | A  | -       | 90.05   | 1  |

gi|70887268|gb|EAO00028.1| citrate synthase, putative [*Trypanosoma cruzi*]

R.RADNEAITAATK.T M+H=1260.654297

DeltaM=1.70598

z=2

P(pep)=1.19E-4

Xcorr=2.34

DCn=0.27

#2218-2218 NL: 7.40E1

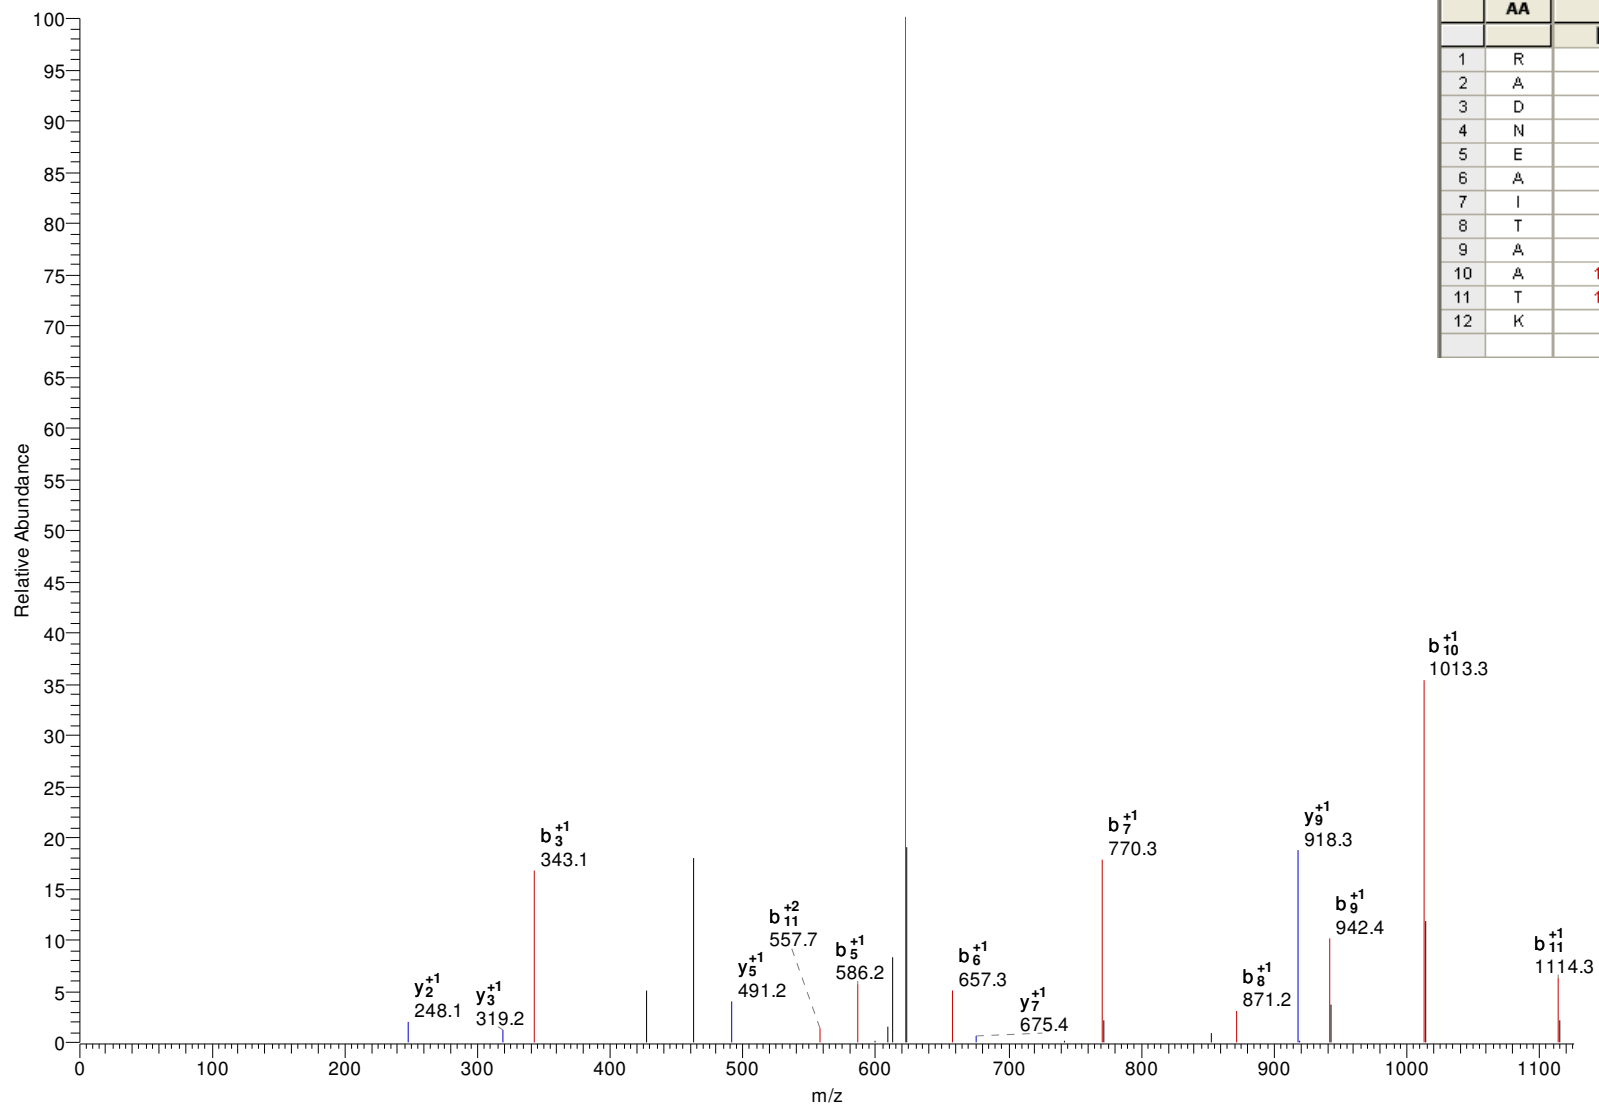

|    | AA | B       | Y       |    |
|----|----|---------|---------|----|
|    |    | ✓       | ✓       |    |
| 1  | R  | 157.11  | -       | 12 |
| 2  | A  | 228.15  | 1104.55 | 11 |
| 3  | D  | 343.17  | 1033.52 | 10 |
| 4  | N  | 457.22  | 918.49  | 9  |
| 5  | E  | 586.26  | 804.45  | 8  |
| 6  | A  | 657.30  | 675.40  | 7  |
| 7  | I  | 770.38  | 604.37  | 6  |
| 8  | T  | 871.43  | 491.28  | 5  |
| 9  | A  | 942.46  | 390.23  | 4  |
| 10 | A  | 1013.50 | 319.20  | 3  |
| 11 | T  | 1114.55 | 248.16  | 2  |
| 12 | K  | -       | 147.11  | 1  |

gi|70879904|gb|EAN93041.1| heat shock protein 85, putative [*Trypanosoma cruzi*]  
R.ELISNSSDACDK.I M+H=1338.584229 DeltaM=1.78288 z=2  
P(pep)=4.83E-05 Xcorr=2.30 DCn=0.20

#2319-2319 NL: 1.06E2

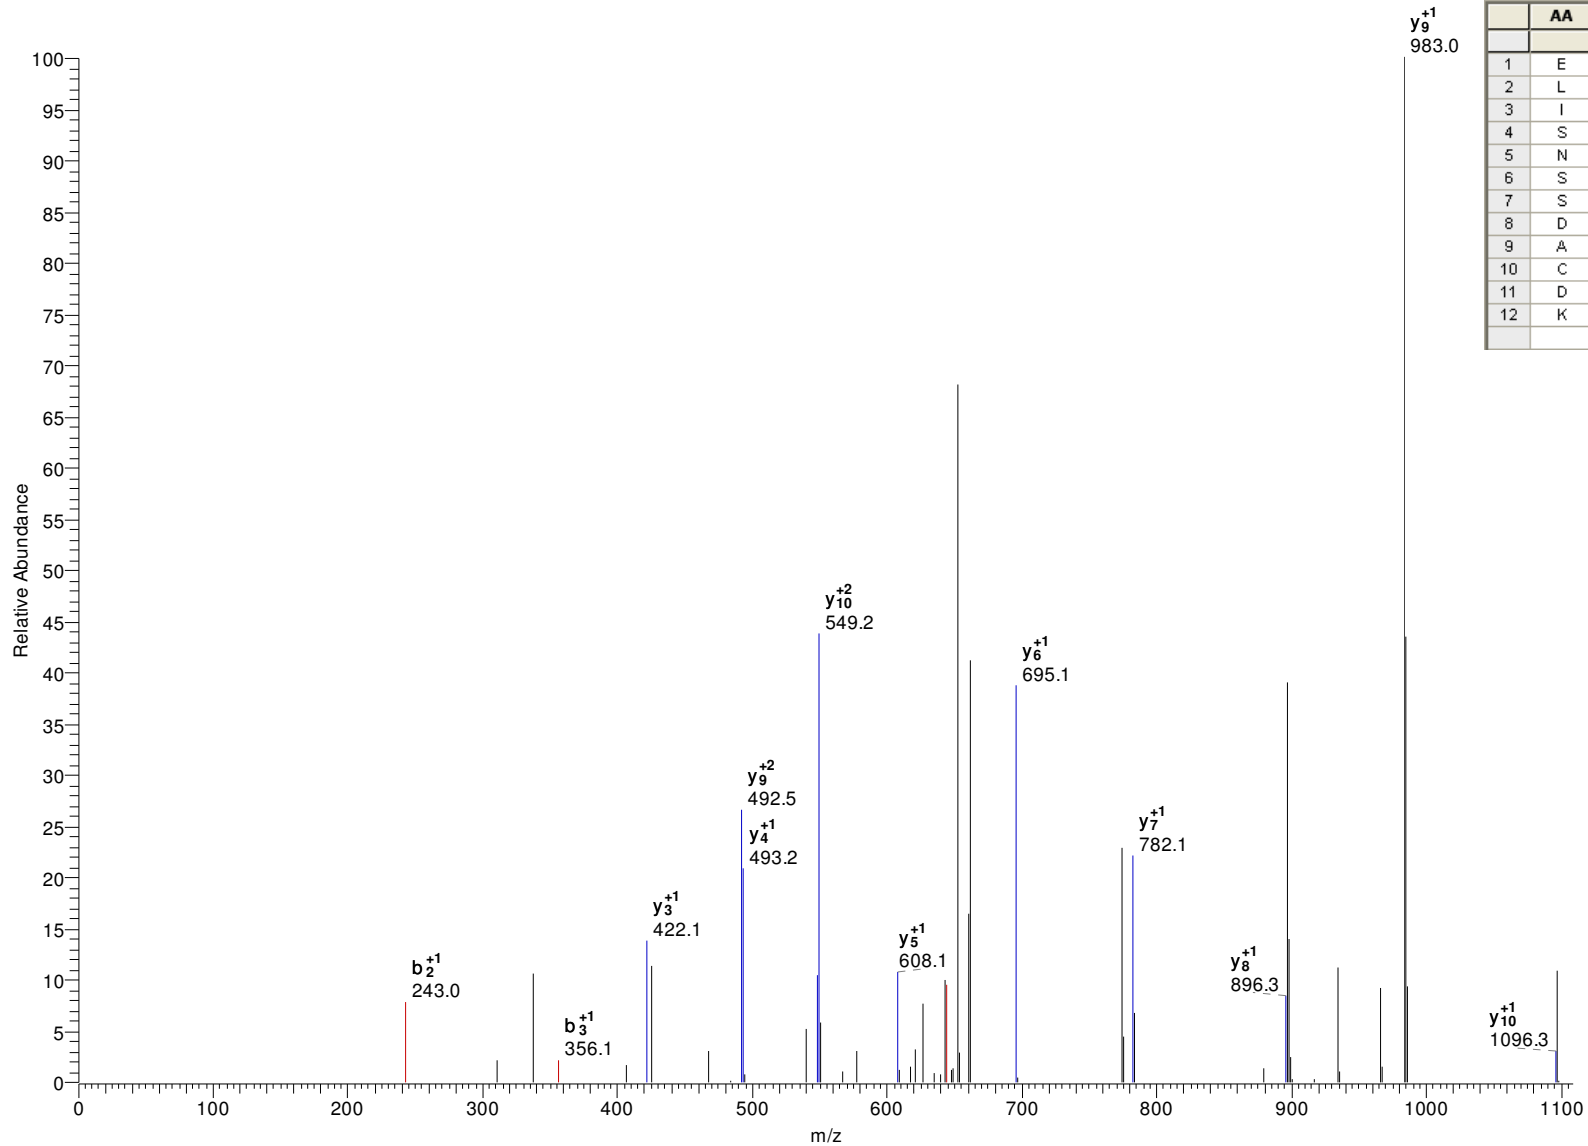

y<sub>9</sub><sup>+1</sup>  
983.0

|    | AA | B       | Y       |    |
|----|----|---------|---------|----|
|    |    | ✓       | ✓       |    |
| 1  | E  | 130.05  | -       | 12 |
| 2  | L  | 243.13  | 1209.54 | 11 |
| 3  | I  | 356.22  | 1096.46 | 10 |
| 4  | S  | 443.25  | 983.37  | 9  |
| 5  | N  | 557.29  | 896.34  | 8  |
| 6  | S  | 644.32  | 782.30  | 7  |
| 7  | S  | 731.36  | 695.27  | 6  |
| 8  | D  | 846.38  | 608.23  | 5  |
| 9  | A  | 917.42  | 493.21  | 4  |
| 10 | C  | 1077.45 | 422.17  | 3  |
| 11 | D  | 1192.48 | 262.14  | 2  |
| 12 | K  | -       | 147.11  | 1  |

gi|70881191|gb|EAN94237.1| hypothetical protein, conserved [*Trypanosoma cruzi*]  
K.EDGSSQWVFESAPDADTR.V M+H=1996.851929 DeltaM=0.85784 z=2  
P(pep)=9.11E-4 Xcorr=2.28 DCn=0.46

#4064-4064 NL: 5.70E1

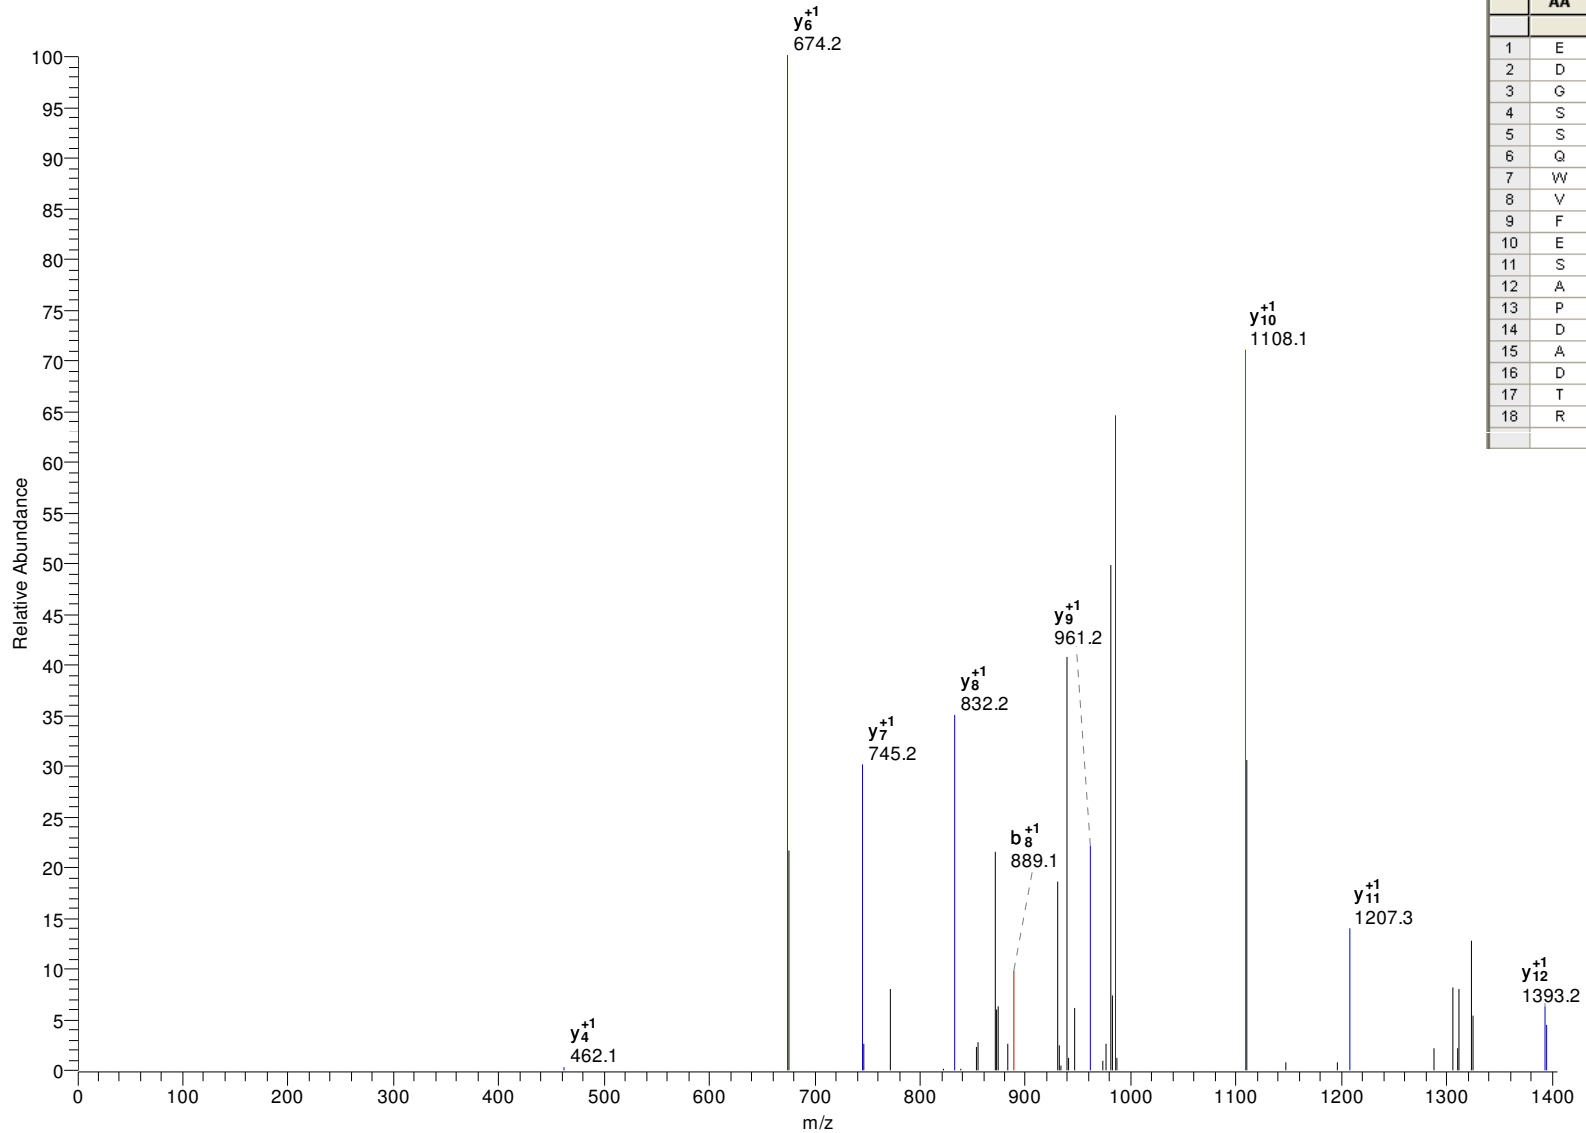

|    | AA | B                                   | Y                                   |    |
|----|----|-------------------------------------|-------------------------------------|----|
|    |    | <input checked="" type="checkbox"/> | <input checked="" type="checkbox"/> |    |
| 1  | E  | 130.05                              | -                                   | 18 |
| 2  | D  | 245.08                              | 1867.81                             | 17 |
| 3  | G  | 302.10                              | 1752.78                             | 16 |
| 4  | S  | 389.13                              | 1695.76                             | 15 |
| 5  | S  | 476.16                              | 1608.73                             | 14 |
| 6  | Q  | 604.22                              | 1521.70                             | 13 |
| 7  | W  | 790.30                              | 1393.64                             | 12 |
| 8  | V  | 889.37                              | 1207.56                             | 11 |
| 9  | F  | 1036.44                             | 1108.49                             | 10 |
| 10 | E  | 1165.48                             | 961.42                              | 9  |
| 11 | S  | 1252.51                             | 832.38                              | 8  |
| 12 | A  | 1323.55                             | 745.35                              | 7  |
| 13 | P  | 1420.60                             | 674.31                              | 6  |
| 14 | D  | 1535.63                             | 577.26                              | 5  |
| 15 | A  | 1606.67                             | 462.23                              | 4  |
| 16 | D  | 1721.69                             | 391.19                              | 3  |
| 17 | T  | 1822.74                             | 276.17                              | 2  |
| 18 | R  | -                                   | 175.12                              | 1  |

gi|70871653|gb|EAN85763.1| small GTP-binding protein Rab1, putative [*Trypanosoma cruzi*]

-.EASNVEEAFTR.-

M+H=1252.580444

DeltaM=0.87505

z=2

P(pep)=6.96E-4

Xcorr=2.18

DCn=0.31

#3318-3318 NL: 1.81E2

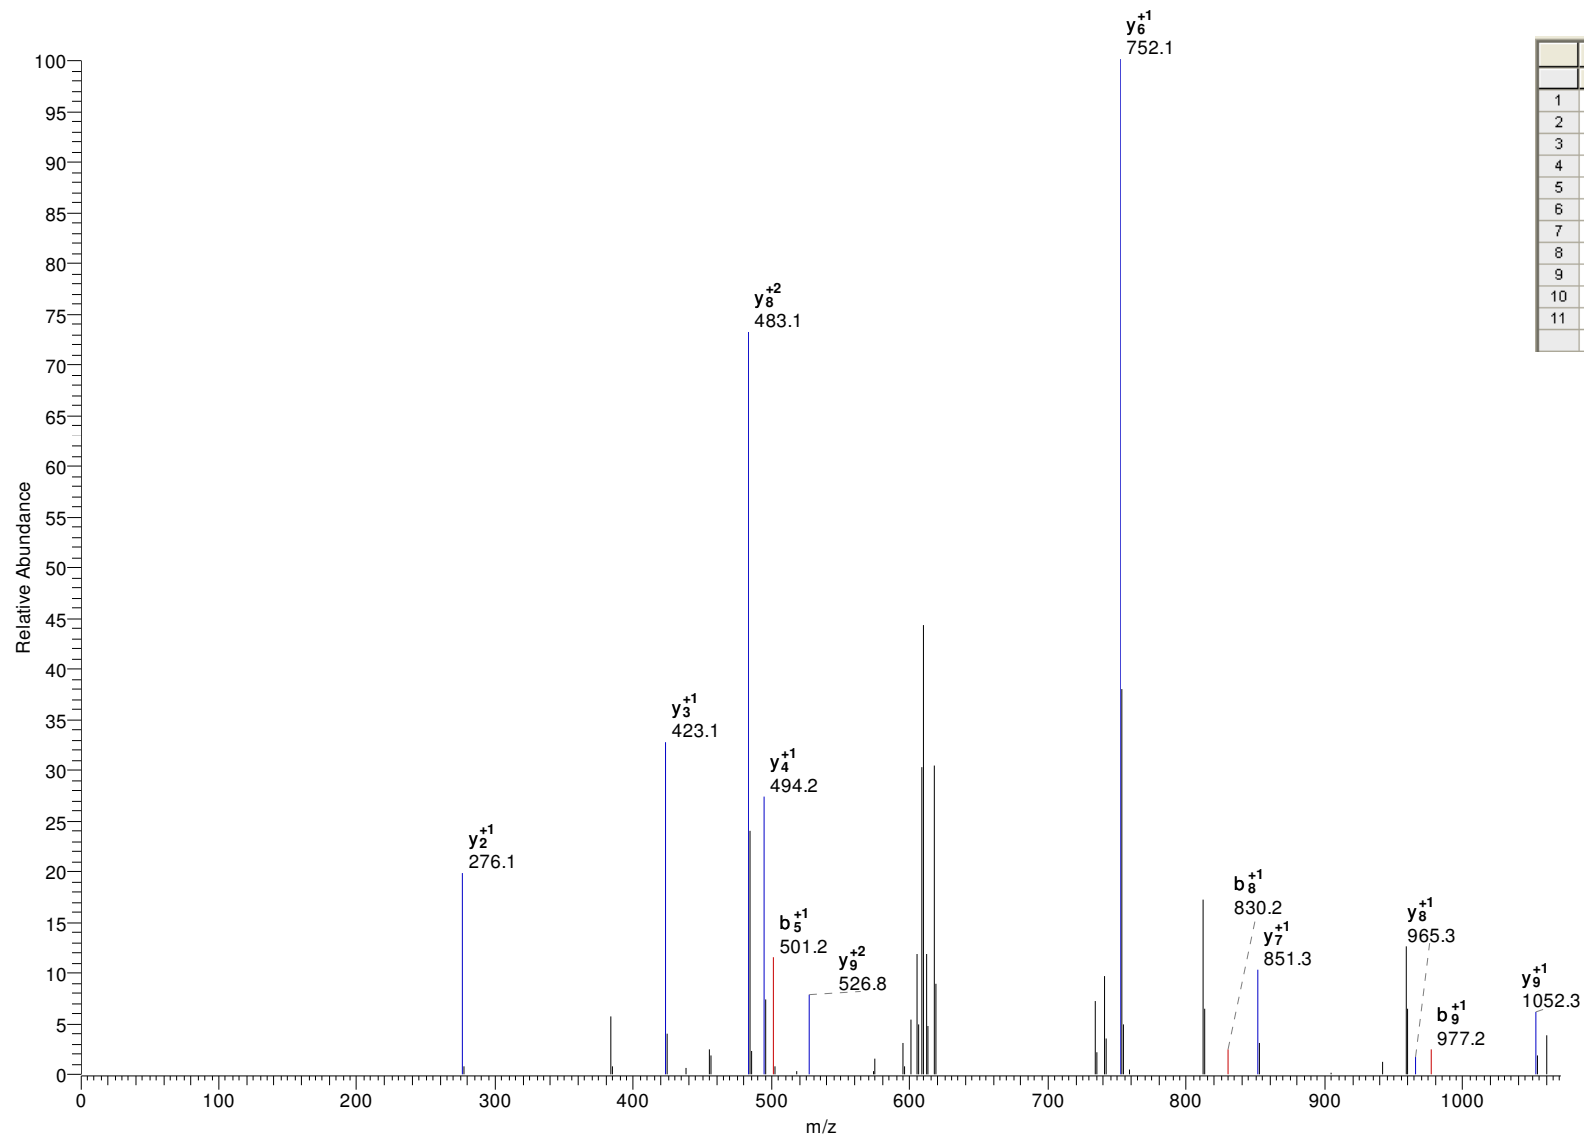

|    | AA | B       | Y       |    |
|----|----|---------|---------|----|
| 1  | E  | 130.05  | -       | 11 |
| 2  | A  | 201.09  | 1123.54 | 10 |
| 3  | S  | 288.12  | 1052.50 | 9  |
| 4  | N  | 402.16  | 965.47  | 8  |
| 5  | V  | 501.23  | 851.43  | 7  |
| 6  | E  | 630.27  | 752.36  | 6  |
| 7  | E  | 759.32  | 623.31  | 5  |
| 8  | A  | 830.35  | 494.27  | 4  |
| 9  | F  | 977.42  | 423.24  | 3  |
| 10 | T  | 1078.47 | 276.17  | 2  |
| 11 | R  | -       | 175.12  | 1  |

gi|70876776|gb|EAN90192.1| *trans*-sialidase, putative [*Trypanosoma cruzi*]

K.NVFLYNRPLNPTEM\*R.A

M+H=1879.948329

DeltaM=0.73312

z=2

P(pep)=9.83E-4

Xcorr=2.06

DCn=0.34

#3723-3723 NL: 5.62E1

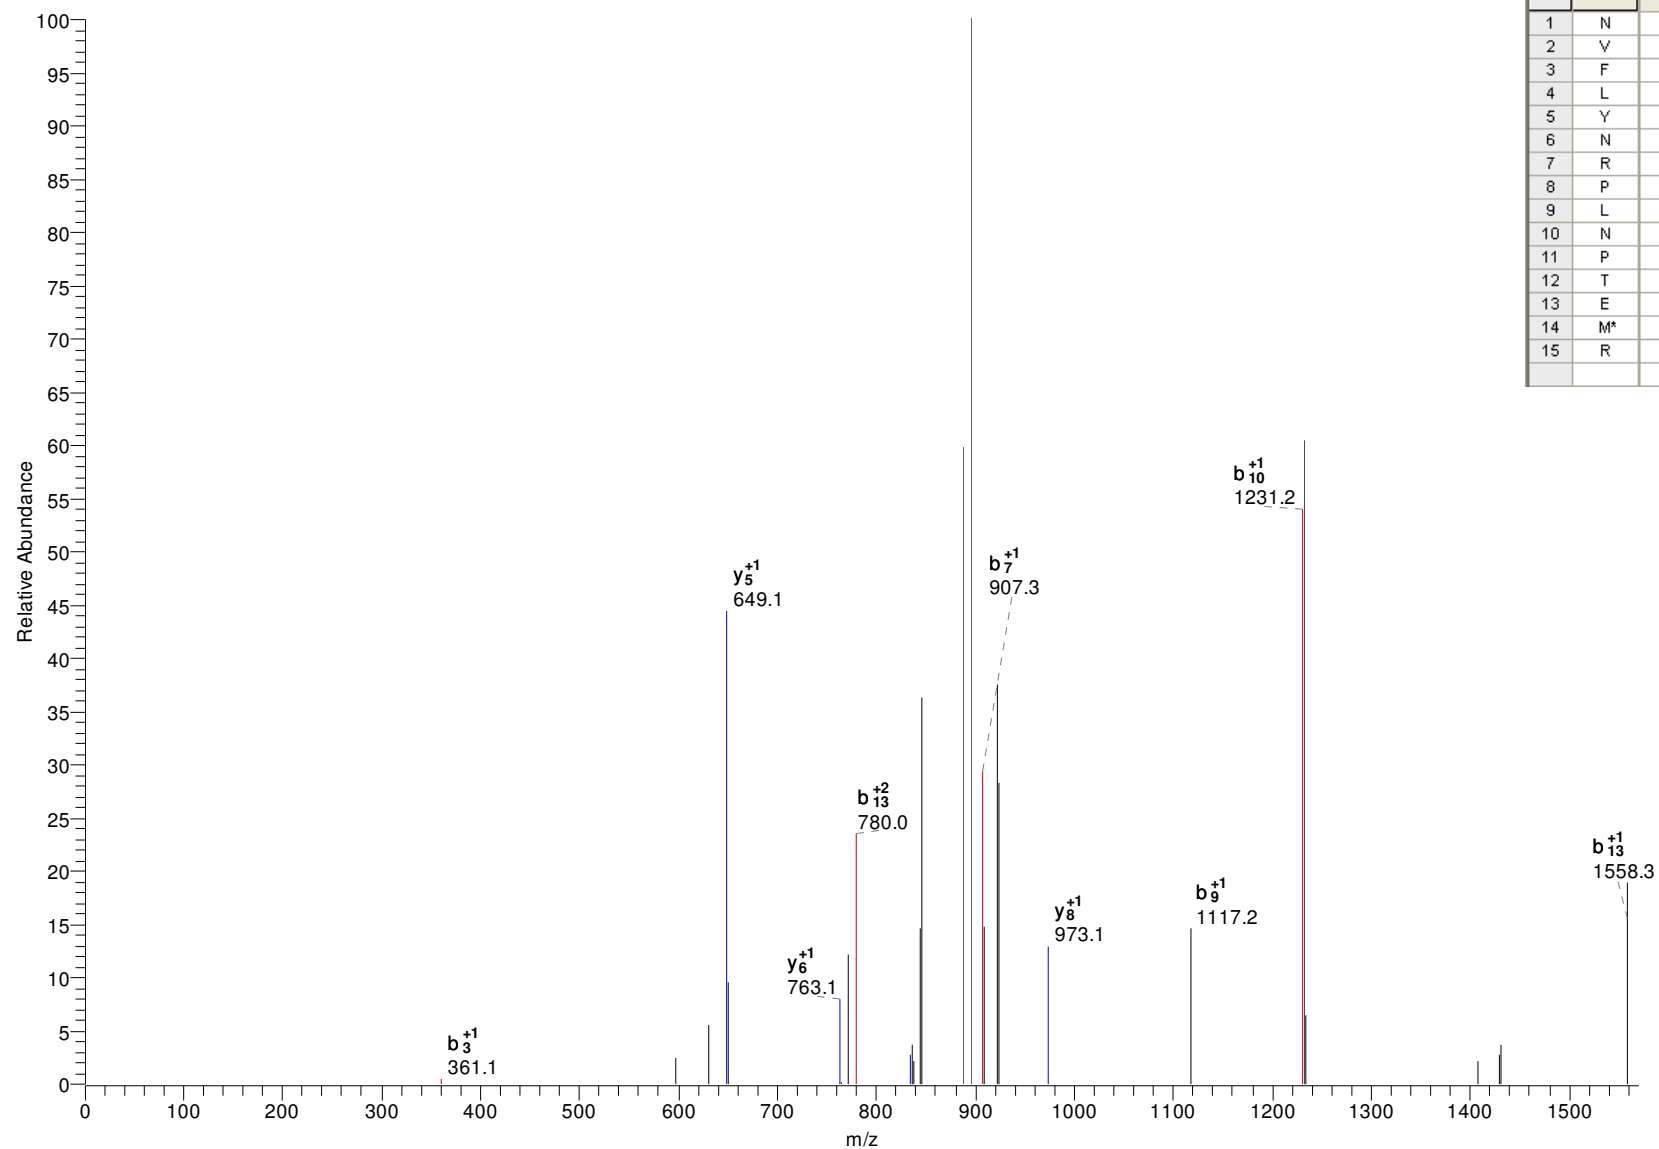

|    | AA | B       | Y       |    |
|----|----|---------|---------|----|
|    |    | ✓       | ✓       |    |
| 1  | N  | 115.05  | -       | 15 |
| 2  | V  | 214.12  | 1765.91 | 14 |
| 3  | F  | 361.19  | 1666.84 | 13 |
| 4  | L  | 474.27  | 1519.77 | 12 |
| 5  | Y  | 637.33  | 1406.68 | 11 |
| 6  | N  | 751.38  | 1243.62 | 10 |
| 7  | R  | 907.48  | 1129.58 | 9  |
| 8  | P  | 1004.53 | 973.48  | 8  |
| 9  | L  | 1117.62 | 876.42  | 7  |
| 10 | N  | 1231.66 | 763.34  | 6  |
| 11 | P  | 1328.71 | 649.30  | 5  |
| 12 | T  | 1429.76 | 552.24  | 4  |
| 13 | E  | 1558.80 | 451.20  | 3  |
| 14 | M* | 1705.84 | 322.15  | 2  |
| 15 | R  | -       | 175.12  | 1  |



gi|70881221|gb|EAN94265.1| hypothetical protein, conserved [Trypanosoma cruzi]  
 K.LPDCDVVANNR.N M+H=1272.600098 DeltaM=0.25688 z=2  
 P(pep)=8.01E-06 Xcorr=2.03 DCn=0.47

#2545-2545 NL: 1.02E2

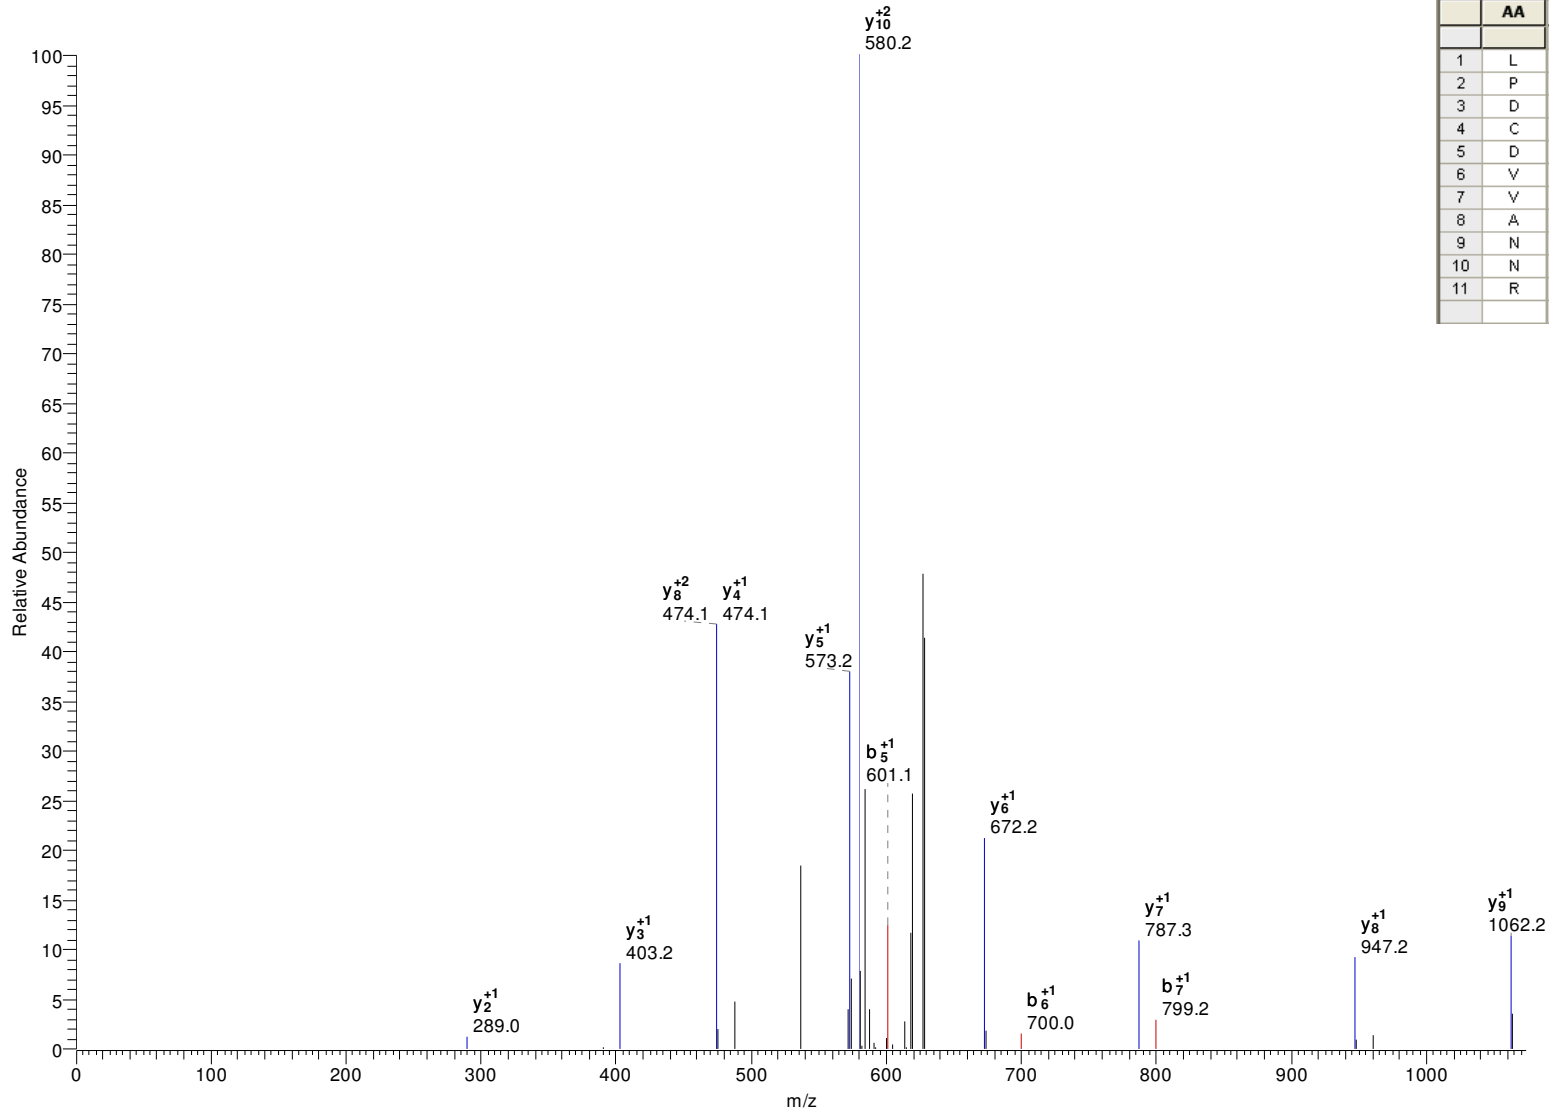

|    | AA | B                                   | Y                                   |    |
|----|----|-------------------------------------|-------------------------------------|----|
|    |    | <input checked="" type="checkbox"/> | <input checked="" type="checkbox"/> |    |
| 1  | L  | 114.09                              | -                                   | 11 |
| 2  | P  | 211.14                              | 1159.52                             | 10 |
| 3  | D  | 326.17                              | 1062.46                             | 9  |
| 4  | C  | 486.20                              | 947.44                              | 8  |
| 5  | D  | 601.23                              | 787.41                              | 7  |
| 6  | V  | 700.30                              | 672.38                              | 6  |
| 7  | V  | 799.37                              | 573.31                              | 5  |
| 8  | A  | 870.40                              | 474.24                              | 4  |
| 9  | N  | 984.45                              | 403.20                              | 3  |
| 10 | N  | 1098.49                             | 289.16                              | 2  |
| 11 | R  | -                                   | 175.12                              | 1  |

gi|3080753|gb|AAC14692.1| glutamate dehydrogenase [*Trypanosoma cruzi*]

-.TNYVNGANIAGFVK.-

M+H=1467.759033

DeltaM=1.08403

z=2

P(pep)=3.63E-4

Xcorr=2.02

DCn=0.25

#4136-4136 NL: 1.81E2

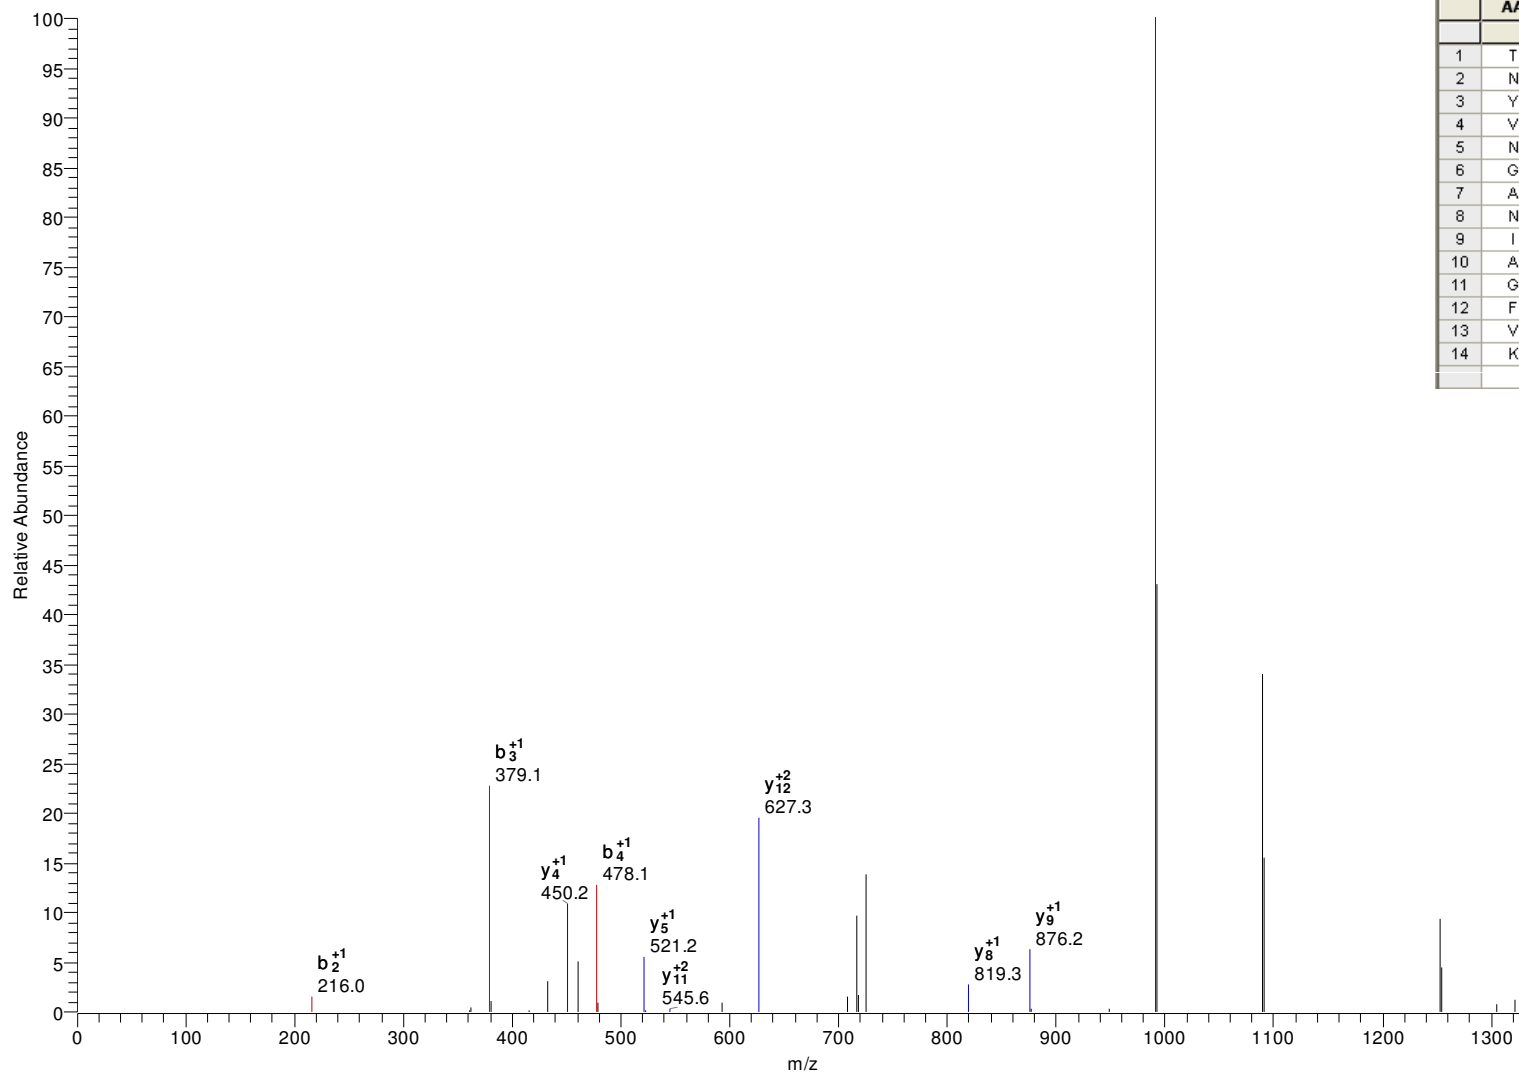

|    | AA | B       | Y       |    |
|----|----|---------|---------|----|
|    |    | ✓       | ✓       |    |
| 1  | T  | 102.05  | -       | 14 |
| 2  | N  | 216.10  | 1366.71 | 13 |
| 3  | Y  | 379.16  | 1252.67 | 12 |
| 4  | V  | 478.23  | 1089.61 | 11 |
| 5  | N  | 592.27  | 990.54  | 10 |
| 6  | G  | 649.29  | 876.49  | 9  |
| 7  | A  | 720.33  | 819.47  | 8  |
| 8  | N  | 834.37  | 748.44  | 7  |
| 9  | I  | 947.46  | 634.39  | 6  |
| 10 | A  | 1018.50 | 521.31  | 5  |
| 11 | G  | 1075.52 | 450.27  | 4  |
| 12 | F  | 1222.59 | 393.25  | 3  |
| 13 | V  | 1321.65 | 246.18  | 2  |
| 14 | K  | -       | 147.11  | 1  |

gi|477257|pir||A48458 gp85/sialidase homolog - *Trypanosoma cruzi* (fragment)

-.VDGVFNPTTTTK.- M+H=1279.652832 DeltaM=1.72319 z=2

P(pep)=2.40E-4 Xcorr=2.88 DCn=0.44

#3046-3046 NL:3.86E2

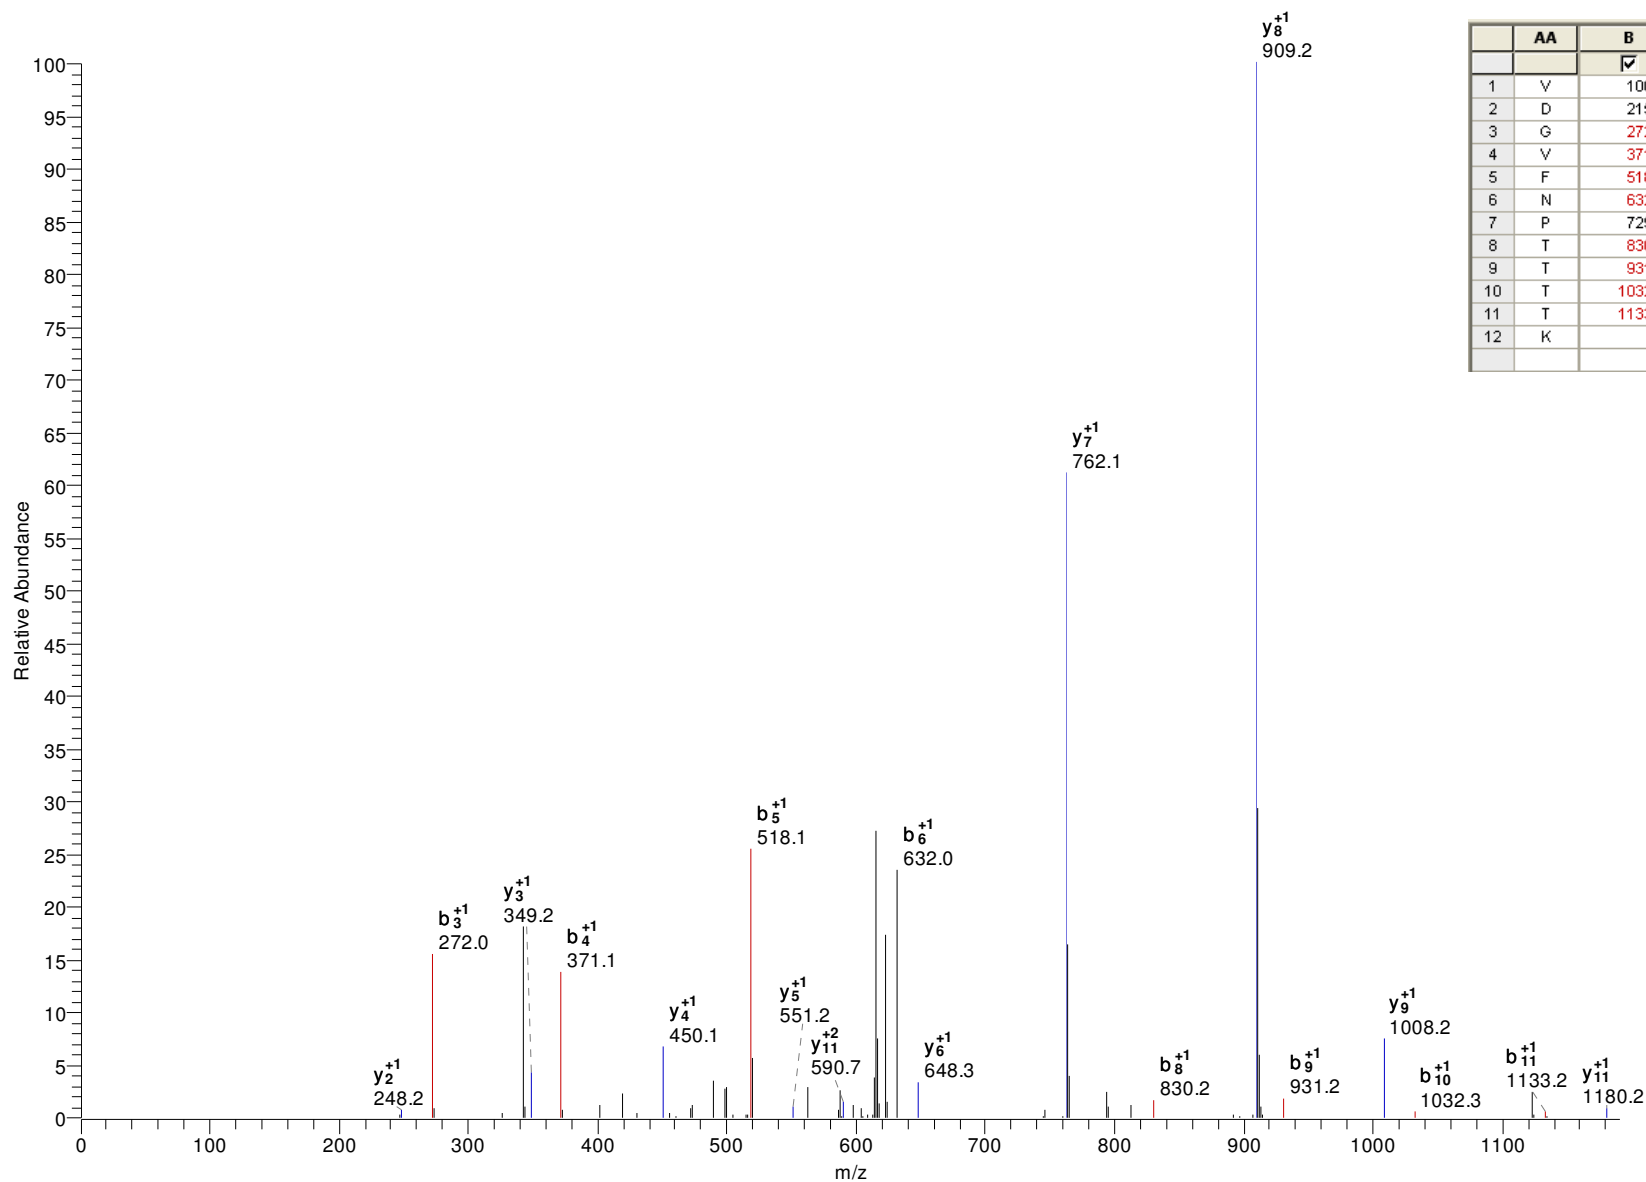

|    | AA | B       | Y       |    |
|----|----|---------|---------|----|
|    |    | ✓       | ✓       |    |
| 1  | V  | 100.08  | -       | 12 |
| 2  | D  | 215.10  | 1180.58 | 11 |
| 3  | G  | 272.12  | 1065.56 | 10 |
| 4  | V  | 371.19  | 1008.54 | 9  |
| 5  | F  | 518.26  | 909.47  | 8  |
| 6  | N  | 632.30  | 762.40  | 7  |
| 7  | P  | 729.36  | 648.36  | 6  |
| 8  | T  | 830.40  | 551.30  | 5  |
| 9  | T  | 931.45  | 450.26  | 4  |
| 10 | T  | 1032.50 | 349.21  | 3  |
| 11 | T  | 1133.55 | 248.16  | 2  |
| 12 | K  | -       | 147.11  | 1  |
